# Supplementary material for: Intrinsic Gata4 expression sensitizes the aortic root to dilation in a Loeys-Dietz syndrome mouse model
Source: Research Square preprint supplement (doi:10.21203/rs.3.rs-4420617/v1), 2024-06-05
Supplement: Supplementary file 1 [file Supplemental Table 1.xlsx]

## Sheet: VSMCs.MRvsWT.diffexp
Supplemental Table 1.
List of all detected transcripts comparing expression in mouse Tgfbr1(M318R/+) VSMC relative to Tgfbr1(+/+) VSMC. Although all detected transcripts are listed, the following filtering criteria were used to select transcripts for downstream analysis: Pct >0.2 in higher expressing sample, Adj P<0.05, Abs FC > 0.25
	p_val	avg_log2FC	pct.1	pct.2	p_val_adj
GFP	1.62e-64	-6.01695	0.001	0.069	3.23e-60
Cacna2d3	1.24e-37	-3.15884	0.005	0.05	2.48e-33
Faim2	8.75e-15	-2.90335	0.002	0.02	1.75e-10
Cck	1.32e-18	-2.85002	0.004	0.026	2.64e-14
AC154546.2	1.17e-10	-2.77606	0.002	0.015	2.34e-06
Ccl21a	1.58e-15	-2.76944	0.008	0.031	3.16e-11
Pnmal2	6.86e-13	-2.68388	0.003	0.019	1.37e-08
Nrn1	8.3e-05	-2.53961	0.003	0.01	1
Mapt	2.23e-22	-2.52526	0.007	0.037	4.46e-18
Arfgef3	9.93e-08	-2.28111	0.002	0.011	0.0019853
Cthrc1	1.44e-12	-2.26637	0.003	0.018	2.88e-08
Lrtm2	1.03e-08	-2.20235	0.003	0.014	0.000205323
Vtcn1	6.92e-11	-2.16707	0.004	0.018	1.38e-06
Rragd	1.01e-05	-2.14886	0.003	0.01	0.20281
Gm17455	2.3e-09	-2.12701	0.004	0.016	4.6e-05
Gm14964	4.35e-12	-2.10244	0.005	0.023	8.69e-08
Mylk2	8.62e-14	-1.97098	0.006	0.025	1.72e-09
Ifit3b	0.000328107	-1.95529	0.007	0.015	1
Ncan	2.58e-06	-1.91582	0.003	0.011	0.0515775
Lrrc7	1.03e-05	-1.9084	0.003	0.011	0.206169
Slc6a7	4.18e-15	-1.89962	0.009	0.032	8.35e-11
Ccdc85a	1.66e-28	-1.8812	0.013	0.055	3.32e-24
Klhl31	3.83e-08	-1.866	0.003	0.014	0.00076634
Cxxc4	2.53e-18	-1.83587	0.013	0.043	5.06e-14
Galnt6	3.37e-65	-1.79179	0.043	0.148	6.73e-61
H2-Aa	9.86e-31	-1.78124	0.031	0.087	1.97e-26
Gm21269	5.38e-07	-1.76711	0.005	0.016	0.0107469
Homer2	1.37e-06	-1.7467	0.003	0.011	0.02746
Wif1	3.09e-113	-1.74285	0.1	0.283	6.18e-109
Perm1	1.02e-09	-1.73961	0.007	0.022	2.03e-05
Lpar1	6.74e-16	-1.73866	0.013	0.04	1.35e-11
Vstm2b	4.3e-33	-1.73153	0.022	0.076	8.6e-29
Slc35g1	5.42e-13	-1.72903	0.008	0.027	1.08e-08
Tfap2b	9.36e-05	-1.70625	0.004	0.011	1
Zfhx4	2.7e-07	-1.70468	0.004	0.013	0.00539909
Pecam1	4.39e-54	-1.69316	0.052	0.148	8.77e-50
Gpd1	4.05e-19	-1.69314	0.016	0.049	8.09e-15
Iglon5	5.88e-08	-1.68513	0.003	0.013	0.00117428
AI463170	3.48e-05	-1.68025	0.003	0.01	0.69503
Gng2	5.85e-13	-1.67159	0.007	0.026	1.17e-08
Btbd11	2.61e-05	-1.66707	0.003	0.01	0.522505
Rab17	2.48e-31	-1.66162	0.023	0.076	4.95e-27
Igf1	2.54e-21	-1.65587	0.033	0.077	5.08e-17
A730017C20Rik	8.62e-05	-1.64446	0.004	0.011	1
Gm7607	5.44e-07	-1.63154	0.003	0.012	0.0108764
Ece2	1.6e-08	-1.60469	0.003	0.014	0.000320659
Cd6	1.07e-05	-1.60011	0.004	0.013	0.21341
Crlf1	3.53e-33	-1.56949	0.045	0.111	7.06e-29
Dbp	1.34e-16	-1.56054	0.013	0.04	2.67e-12
2810433D01Rik	5.86e-21	-1.55963	0.02	0.058	1.17e-16
Tceal6	1.11e-17	-1.55406	0.016	0.047	2.21e-13
Tmem229b	1.04e-05	-1.53928	0.005	0.014	0.207767
Col20a1	4.04e-05	-1.52561	0.004	0.012	0.807073
3110079O15Rik	8.92e-09	-1.51958	0.007	0.021	0.000178292
Ccdc121	6.49e-05	-1.51466	0.003	0.01	1
H2-Ab1	6.3e-41	-1.5128	0.042	0.118	1.26e-36
Ankrd35	1.36e-05	-1.51187	0.006	0.015	0.270994
Kcnj15	3.18e-113	-1.51051	0.107	0.295	6.35e-109
Klhl3	4.74e-13	-1.50737	0.006	0.026	9.47e-09
Krt79	3.9e-08	-1.50621	0.005	0.017	0.000779765
Dpysl5	0.000598507	-1.49715	0.004	0.01	1
Tnnt3	4.4e-07	-1.49039	0.005	0.016	0.00878609
Srrm4	7.32e-06	-1.49004	0.005	0.014	0.146332
Dlx6	1.52e-08	-1.48965	0.008	0.022	0.00030294
Ano2	3.04e-07	-1.48139	0.009	0.022	0.00607241
Jph4	1.5e-11	-1.47693	0.007	0.025	3e-07
Arhgap45	4.44e-05	-1.46403	0.004	0.011	0.887848
Htra3	4.62e-233	-1.45366	0.285	0.594	9.23e-229
Ston2	3.03e-13	-1.44583	0.012	0.034	6.06e-09
H2-Eb1	2.6e-33	-1.43601	0.042	0.108	5.21e-29
Mfap5	5.44e-287	-1.43463	0.391	0.707	1.09e-282
2900055J20Rik	3.28e-36	-1.42806	0.037	0.104	6.56e-32
Ephb2	3.07e-07	-1.42718	0.005	0.015	0.0061322
Nrxn2	5.74e-06	-1.42571	0.004	0.012	0.114702
Cnr1	8.39e-14	-1.42408	0.012	0.036	1.68e-09
Negr1	0.0012563	-1.42091	0.007	0.014	1
Slamf9	0.000264157	-1.41911	0.004	0.01	1
Aspa	8.26e-05	-1.41242	0.004	0.012	1
Slc24a4	1.09e-07	-1.40835	0.004	0.014	0.00217053
Jam2	6.21e-13	-1.40371	0.014	0.037	1.24e-08
Entpd2	1.78e-28	-1.40263	0.032	0.086	3.55e-24
H2-DMb1	1.03e-50	-1.40028	0.055	0.149	2.06e-46
Lurap1l	5.03e-25	-1.3983	0.022	0.067	1e-20
Apobec1	2.11e-12	-1.38332	0.011	0.032	4.22e-08
Chrna1	5.7e-06	-1.3782	0.007	0.017	0.113872
4933431E20Rik	8.58e-07	-1.36684	0.008	0.019	0.0171504
Cdon	4.46e-21	-1.3647	0.028	0.07	8.92e-17
Slc16a9	4.2e-23	-1.35809	0.026	0.07	8.39e-19
Rimklb	1.24e-06	-1.35397	0.008	0.02	0.0248094
Nap1l5	5e-34	-1.34937	0.037	0.101	1e-29
Agmo	1.68e-06	-1.34799	0.003	0.012	0.0335669
Scube1	4.88e-05	-1.34481	0.006	0.014	0.975952
Col27a1	9.05e-22	-1.33017	0.026	0.068	1.81e-17
Enpp3	2.13e-15	-1.32617	0.014	0.041	4.27e-11
Cd74	1.57e-40	-1.32442	0.117	0.217	3.13e-36
Casq1	2.33e-26	-1.32072	0.049	0.108	4.65e-22
Prg4	8.8e-07	-1.31947	0.015	0.03	0.0175928
Ifit3	0.0422399	-1.3179	0.014	0.02	1
Mlxipl	9.39e-17	-1.31752	0.014	0.044	1.88e-12
Sfrp2	1.45e-27	-1.29717	0.101	0.175	2.89e-23
Ly6e	1.93e-05	-1.29449	0.015	0.027	0.385835
4930480K23Rik	0.000374522	-1.29363	0.006	0.013	1
Cldn3	3.03e-28	-1.29094	0.048	0.109	6.06e-24
Igfbp5	4.78e-37	-1.28573	0.089	0.177	9.54e-33
Sfrp4	2.59e-14	-1.28541	0.02	0.049	5.18e-10
1700001O22Rik	0.000768574	-1.28472	0.005	0.012	1
Aknad1	0.00031945	-1.27634	0.004	0.011	1
Zfp661	0.00156717	-1.27303	0.007	0.014	1
Mia	1.36e-16	-1.27189	0.025	0.06	2.73e-12
Mmp9	9.07e-07	-1.2718	0.008	0.02	0.0181202
Aqp11	2.24e-07	-1.27137	0.007	0.019	0.00447465
Tmem35a	7.42e-18	-1.2701	0.018	0.051	1.48e-13
Calml4	6.72e-05	-1.26961	0.009	0.018	1
Gchfr	1.79e-12	-1.26928	0.017	0.042	3.58e-08
Klhl32	2.26e-06	-1.26841	0.007	0.018	0.0451918
Hspa1l	8.91e-17	-1.26309	0.018	0.049	1.78e-12
Ccl19	2.14e-11	-1.26018	0.013	0.034	4.27e-07
Mamstr	2.28e-07	-1.25891	0.005	0.016	0.00456286
Fam174b	2.01e-20	-1.25761	0.025	0.065	4.01e-16
Col6a6	4.26e-07	-1.25689	0.009	0.023	0.00850786
Glrb	9.77e-09	-1.2516	0.013	0.03	0.000195158
Acat3	0.000448971	-1.2498	0.005	0.012	1
Lrrc17	1.33e-120	-1.24853	0.197	0.413	2.66e-116
Emid1	3.55e-20	-1.24758	0.033	0.076	7.1e-16
Apobec2	1.76e-23	-1.24387	0.033	0.081	3.52e-19
Pianp	6.84e-05	-1.23938	0.009	0.018	1
Sdr42e1	0.00186525	-1.23657	0.004	0.01	1
Rgs5	9.09e-26	-1.2342	0.203	0.291	1.82e-21
Clec11a	9.06e-31	-1.23295	0.073	0.146	1.81e-26
Nrep	7.2e-20	-1.23061	0.031	0.073	1.44e-15
Apobr	6.43e-10	-1.22028	0.015	0.034	1.29e-05
Irx3	3.75e-34	-1.21705	0.049	0.119	7.49e-30
Slc22a4	1.62e-10	-1.21697	0.01	0.028	3.24e-06
Psmb9	6.3e-12	-1.21664	0.012	0.034	1.26e-07
Hhip	0.00187093	-1.21435	0.004	0.01	1
Rab3il1	1.42e-06	-1.21147	0.008	0.019	0.0284501
Efna4	0.00076522	-1.20774	0.005	0.012	1
Cdh4	0.000117575	-1.20319	0.006	0.014	1
Tspan15	1.22e-10	-1.19778	0.017	0.039	2.43e-06
Tubg2	1.74e-05	-1.19646	0.005	0.013	0.34863
Actn2	3.65e-28	-1.19412	0.043	0.103	7.3e-24
Xylt1	2.55e-19	-1.18753	0.033	0.076	5.1e-15
Cstad	1.51e-08	-1.17858	0.014	0.032	0.00030275
Eva1a	4.76e-25	-1.1757	0.032	0.082	9.52e-21
F2rl1	2.75e-13	-1.17361	0.02	0.048	5.5e-09
Dpt	1.67e-27	-1.17107	0.039	0.096	3.33e-23
Cpxm1	2.21e-06	-1.1697	0.016	0.031	0.0441587
Foxf1	1.01e-41	-1.16627	0.08	0.172	2.02e-37
Smtnl2	1.18e-06	-1.16575	0.011	0.024	0.0235633
Adora1	3.74e-06	-1.15673	0.006	0.016	0.0748428
Ism1	0.000206145	-1.15627	0.007	0.015	1
Ppm1j	1.84e-24	-1.15611	0.034	0.084	3.67e-20
Ndufa4l2	0.000239275	-1.15371	0.02	0.031	1
Ppp1r36	2.49e-13	-1.15127	0.017	0.043	4.98e-09
Procr	1.53e-15	-1.15082	0.021	0.053	3.05e-11
Olfr328	0.00030763	-1.14801	0.006	0.013	1
Nos3	0.0188845	-1.14499	0.007	0.012	1
Tmem26	7.89e-10	-1.14271	0.013	0.033	1.58e-05
Fxyd2	5.38e-07	-1.14197	0.008	0.02	0.0107443
Rab7b	0.0019004	-1.14043	0.004	0.01	1
Kif1a	7.48e-11	-1.13521	0.019	0.043	1.5e-06
Fap	3e-08	-1.13443	0.014	0.031	0.000598806
Lgals9	7.41e-09	-1.13161	0.014	0.032	0.000148
Gxylt2	4.58e-139	-1.13002	0.312	0.55	9.15e-135
Slc16a10	2.5e-21	-1.1299	0.035	0.081	4.99e-17
Hlf	3.94e-26	-1.12752	0.042	0.098	7.88e-22
6030419C18Rik	3.65e-11	-1.12448	0.02	0.044	7.29e-07
Fam117a	2.27e-05	-1.1201	0.011	0.022	0.453298
Nkain4	2.72e-06	-1.11986	0.008	0.019	0.0542712
Gm14322	0.000104902	-1.11957	0.008	0.016	1
Prss12	2.69e-07	-1.11401	0.014	0.03	0.00538207
Dtx4	0.000131023	-1.11226	0.008	0.016	1
Aff3	7.38e-13	-1.11223	0.025	0.053	1.47e-08
Prrt1	1.3e-05	-1.10929	0.008	0.019	0.258965
Gm5532	1.45e-11	-1.10752	0.015	0.038	2.91e-07
Pex11g	4.48e-09	-1.10683	0.017	0.037	8.96e-05
Dnah7a	0.000220754	-1.10136	0.004	0.011	1
Pdpn	0.000126662	-1.10118	0.004	0.011	1
Stc2	3.04e-09	-1.09815	0.02	0.04	6.07e-05
Hdhd3	7.28e-14	-1.09661	0.022	0.052	1.46e-09
Lamc2	0.0047707	-1.09474	0.007	0.013	1
Clmp	7.6e-22	-1.09278	0.041	0.09	1.52e-17
Tmem44	0.000102301	-1.09207	0.004	0.011	1
Zcchc18	3.28e-12	-1.08998	0.018	0.042	6.57e-08
Abcc9	1.53e-62	-1.08964	0.154	0.296	3.05e-58
Afap1l2	5.02e-05	-1.08957	0.007	0.016	1
Medag	6.09e-34	-1.08956	0.069	0.146	1.22e-29
AL590144.3	1.31e-16	-1.08735	0.023	0.056	2.63e-12
Stard4	3.72e-13	-1.08377	0.024	0.053	7.43e-09
Slc38a4	0.00507336	-1.08148	0.005	0.01	1
Sema3c	1.87e-67	-1.08102	0.146	0.294	3.73e-63
Chst11	3.93e-06	-1.08064	0.007	0.018	0.0786161
Myom3	5.48e-05	-1.0802	0.006	0.015	1
H2-DMa	5.66e-06	-1.0797	0.01	0.021	0.11319
Tnxb	2.46e-54	-1.07592	0.126	0.25	4.92e-50
Myoz2	2.44e-37	-1.0759	0.098	0.189	4.87e-33
Mpped2	4.32e-36	-1.07553	0.059	0.137	8.63e-32
Rcor2	8.8e-06	-1.07445	0.007	0.018	0.175922
E130006D01Rik	1.42e-12	-1.07295	0.027	0.055	2.84e-08
Colca2	0.000805472	-1.0717	0.006	0.013	1
F3	2.36e-26	-1.07123	0.038	0.093	4.72e-22
Fam241b	1.55e-06	-1.07073	0.012	0.025	0.0309958
Dennd2a	2.71e-10	-1.07042	0.018	0.04	5.42e-06
Lrrc38	6.99e-10	-1.07018	0.014	0.033	1.4e-05
Il18bp	0.00318788	-1.06787	0.004	0.01	1
Elovl7	3.26e-13	-1.06556	0.031	0.063	6.51e-09
Hopx	0.018335	-1.06326	0.007	0.012	1
Mfap4	0	-1.06223	0.824	0.921	0
Wasf3	0.000697397	-1.06188	0.004	0.011	1
Cd109	4.46e-28	-1.06157	0.062	0.128	8.91e-24
Pola2	6.08e-21	-1.06098	0.046	0.095	1.22e-16
Nxpe4	2.64e-05	-1.06061	0.008	0.018	0.52838
Prrx2	1.07e-16	-1.0605	0.026	0.061	2.13e-12
Fbln1	5.49e-52	-1.05951	0.122	0.243	1.1e-47
Cnksr1	0.00255581	-1.05883	0.006	0.011	1
Lrrc4b	1.78e-06	-1.05377	0.01	0.023	0.0355674
Ky	1.22e-08	-1.05191	0.014	0.032	0.000244552
Tmem241	0.000319315	-1.05023	0.006	0.014	1
Ccdc85c	1.66e-14	-1.0501	0.03	0.063	3.32e-10
Nanos3	1.87e-05	-1.04938	0.006	0.015	0.37312
Shc2	0.000948119	-1.04829	0.009	0.016	1
Eln	9.01e-267	-1.04316	0.812	0.93	1.8e-262
Aplp1	5.35e-40	-1.04232	0.073	0.162	1.07e-35
Syt15	3.57e-30	-1.03593	0.066	0.138	7.13e-26
Tshz2	4.09e-17	-1.03159	0.034	0.073	8.17e-13
Adcy4	0.00115075	-1.03023	0.004	0.01	1
Tgfbi	1.56e-05	-1.02941	0.016	0.029	0.312195
Actc1	0.030526	-1.02576	0.008	0.012	1
Pdlim4	2.11e-131	-1.02309	0.305	0.544	4.22e-127
Add3	2.16e-41	-1.02264	0.076	0.168	4.31e-37
Mrln	0.00109843	-1.02065	0.004	0.01	1
Dnah7b	0.00163438	-1.01994	0.007	0.013	1
2310030G06Rik	0.00105006	-1.01624	0.006	0.013	1
Map2k6	2.22e-14	-1.00958	0.039	0.075	4.43e-10
6430548M08Rik	0.000937157	-1.00873	0.005	0.011	1
Plvap	1.64e-76	-1.00647	0.172	0.339	3.27e-72
Zfp52	2.31e-05	-1.00389	0.011	0.022	0.461751
Dagla	0.00255662	-1.00302	0.005	0.011	1
Gm20383	6.57e-12	-1.00217	0.025	0.053	1.31e-07
Ccdc42	2.97e-56	-1.00092	0.177	0.312	5.94e-52
Pik3r3	4.71e-09	-0.99994	0.016	0.035	9.42e-05
Alpl	1.97e-07	-0.999095	0.013	0.028	0.00392859
Aqp1	7.16e-67	-0.996957	0.202	0.359	1.43e-62
Ppp1r1b	6.21e-09	-0.995566	0.011	0.028	0.000124074
Dusp18	0.00321988	-0.99552	0.005	0.011	1
Fez1	7.42e-08	-0.994809	0.016	0.034	0.00148298
Pigz	4.84e-06	-0.994465	0.013	0.026	0.0967584
P2ry6	6.27e-28	-0.993594	0.045	0.106	1.25e-23
Fam84a	5.64e-48	-0.99338	0.108	0.219	1.13e-43
Crispld2	2.84e-110	-0.988828	0.318	0.536	5.67e-106
Jmjd4	0.000220037	-0.984432	0.004	0.011	1
Tubb4a	3.52e-25	-0.983351	0.045	0.101	7.04e-21
Dlx6os1	0.000666735	-0.977598	0.007	0.014	1
Bdh1	6.95e-43	-0.96962	0.117	0.222	1.39e-38
Ldb2	8.73e-45	-0.965659	0.109	0.215	1.75e-40
Adcy7	3.99e-64	-0.965502	0.156	0.302	7.97e-60
Hebp2	0.00301884	-0.965442	0.008	0.014	1
Osr1	3.03e-119	-0.96123	0.423	0.629	6.06e-115
Bmpr1b	3.13e-37	-0.959814	0.078	0.165	6.26e-33
Rassf9	0.000385441	-0.959224	0.011	0.02	1
Myadml2	6.18e-06	-0.957943	0.012	0.024	0.123564
Slc35g2	1.17e-08	-0.955683	0.018	0.037	0.000234568
Cxcl16	1.73e-05	-0.951627	0.014	0.027	0.346525
Gm15998	0.000781472	-0.948564	0.005	0.012	1
Casq2	9.24e-06	-0.94685	0.018	0.032	0.184575
Ttyh2	2.09e-09	-0.943704	0.015	0.034	4.18e-05
Sulf2	6.69e-47	-0.941964	0.151	0.269	1.34e-42
L3hypdh	8.06e-24	-0.939801	0.054	0.111	1.61e-19
Gm43573	0.00296431	-0.937863	0.008	0.014	1
Frzb	6.87e-48	-0.937173	0.115	0.229	1.37e-43
Ccdc60	1.02e-09	-0.933188	0.018	0.039	2.05e-05
Larp6	5.79e-05	-0.932079	0.011	0.021	1
Zfp820	0.0100907	-0.931314	0.005	0.01	1
AC161607.1	0.0051456	-0.930726	0.005	0.01	1
Dsp	9.63e-93	-0.92405	0.288	0.483	1.93e-88
AC154509.1	2.16e-22	-0.921829	0.058	0.114	4.31e-18
Itm2a	7.39e-07	-0.920915	0.024	0.042	0.0147626
Gm13305	0.00495555	-0.920655	0.007	0.012	1
Mrc2	1.7e-30	-0.918768	0.077	0.153	3.4e-26
Colec11	0.660368	-0.918023	0.01	0.011	1
Lynx1	2.54e-18	-0.914775	0.045	0.091	5.08e-14
Cd55	1.47e-16	-0.913842	0.04	0.081	2.94e-12
Plppr2	1.26e-05	-0.912928	0.013	0.025	0.251415
Tbxas1	0.0132225	-0.912379	0.007	0.012	1
Mlst8	1.31e-06	-0.911659	0.017	0.033	0.0262327
Pde1b	1.45e-05	-0.909824	0.009	0.02	0.290081
Nav1	6.03e-27	-0.907915	0.074	0.143	1.2e-22
Slc16a11	1.7e-20	-0.907671	0.051	0.102	3.39e-16
Vcan	1.64e-46	-0.905396	0.145	0.265	3.27e-42
Ccdc88c	8.35e-14	-0.904466	0.025	0.055	1.67e-09
Orai2	1.35e-05	-0.903092	0.008	0.019	0.270587
Erg	2.6e-06	-0.900489	0.016	0.031	0.0519268
C1qtnf6	1.12e-33	-0.900484	0.098	0.186	2.23e-29
Gm30524	0.0012278	-0.89699	0.009	0.016	1
4930579P08Rik	6.31e-11	-0.896874	0.031	0.058	1.26e-06
Cabp1	0.000664119	-0.895642	0.009	0.017	1
Cyp26b1	0.0135766	-0.894548	0.008	0.013	1
Ccdc42os	5.8e-07	-0.893084	0.011	0.024	0.0115864
Sel1l3	2.46e-13	-0.892809	0.042	0.078	4.92e-09
Lrp8	0.00310198	-0.891935	0.007	0.013	1
BC043934	0.00530127	-0.89177	0.008	0.014	1
9130023H24Rik	4.77e-07	-0.887694	0.021	0.038	0.00952962
Tanc2	1.05e-36	-0.887047	0.11	0.205	2.1e-32
Gm4724	0.00253091	-0.886461	0.007	0.014	1
Arrdc3	3.46e-38	-0.883902	0.132	0.234	6.91e-34
Med9os	0.000272155	-0.883695	0.009	0.018	1
Gpr153	1.1e-20	-0.883497	0.059	0.114	2.21e-16
Tmem86a	3.17e-16	-0.882203	0.044	0.085	6.34e-12
Zfp984	0.00261776	-0.881775	0.005	0.01	1
Gm1673	1.25e-05	-0.880123	0.012	0.024	0.249424
Pid1	2.11e-48	-0.879927	0.136	0.256	4.23e-44
Gm3739	0.00132049	-0.879548	0.007	0.014	1
Gm16861	0.00203015	-0.876685	0.005	0.011	1
Gm45509	0.00121911	-0.87665	0.005	0.011	1
C3	1.79e-11	-0.875544	0.031	0.059	3.59e-07
Rsph1	3.17e-10	-0.873413	0.019	0.041	6.33e-06
Rnf32	0.0269279	-0.873305	0.006	0.01	1
A530013C23Rik	0.0224662	-0.87143	0.006	0.01	1
Dpy19l3	2.5e-09	-0.871427	0.03	0.054	4.99e-05
Gas1	6.45e-62	-0.870317	0.23	0.388	1.29e-57
Gm20594	0.00415554	-0.869147	0.006	0.011	1
Pcolce2	1.89e-44	-0.861637	0.214	0.339	3.78e-40
Gm16152	0.00318696	-0.856903	0.004	0.01	1
Hgf	2.89e-05	-0.856402	0.013	0.025	0.577542
Igfbp2	0.0135611	-0.855377	0.106	0.12	1
Creb5	9.65e-71	-0.855123	0.255	0.427	1.93e-66
Rnf144a	0.00448483	-0.854322	0.01	0.016	1
Kcnip3	0.000166972	-0.853666	0.011	0.02	1
Btc	1.44e-08	-0.852606	0.036	0.061	0.000286842
Gm26771	3.7e-13	-0.852406	0.025	0.055	7.39e-09
Sept1	2.06e-10	-0.84883	0.04	0.069	4.11e-06
C4b	1.82e-07	-0.848499	0.021	0.04	0.00363121
Alpk2	0.00548861	-0.848437	0.01	0.016	1
Anpep	4.5e-07	-0.847197	0.017	0.034	0.00898971
Qpct	6.6e-39	-0.84582	0.109	0.208	1.32e-34
Pcdhb18	0.0554692	-0.845571	0.006	0.01	1
Scara5	0.00508721	-0.842492	0.01	0.017	1
Ebf2	0.116143	-0.842085	0.008	0.011	1
Tceal3	6.93e-32	-0.840499	0.126	0.217	1.39e-27
Wdr5b	2.15e-06	-0.839139	0.023	0.04	0.0430351
Dhcr7	3.99e-09	-0.838966	0.019	0.04	7.98e-05
Fam198a	0.000356988	-0.838895	0.005	0.012	1
Isg15	0.00372261	-0.837948	0.031	0.043	1
Idi1	1.05e-39	-0.837767	0.173	0.286	2.1e-35
Foxo6	6.11e-08	-0.836634	0.018	0.035	0.00122053
Proser2	3e-11	-0.834598	0.028	0.055	5.99e-07
Fndc10	8.95e-05	-0.834521	0.011	0.021	1
Grid2	1.44e-08	-0.833619	0.031	0.055	0.000286865
Gm44777	0.0270453	-0.833438	0.006	0.01	1
Kctd15	2.9e-11	-0.831888	0.024	0.05	5.8e-07
Ankrd23	0.000178836	-0.828372	0.008	0.017	1
Sypl2	0.00553396	-0.827402	0.008	0.014	1
Ermp1	4.53e-13	-0.826294	0.045	0.082	9.04e-09
Tceal5	7.55e-10	-0.825585	0.042	0.071	1.51e-05
Twist2	1.19e-07	-0.825441	0.023	0.043	0.00237878
Gbp3	0.00612563	-0.825196	0.028	0.038	1
Tdrp	3.35e-06	-0.824959	0.012	0.025	0.0669117
Ifih1	0.00245774	-0.821052	0.008	0.014	1
Upb1	1.92e-09	-0.818018	0.028	0.053	3.85e-05
Pcsk5	6.16e-23	-0.817457	0.089	0.155	1.23e-18
4732414G09Rik	1.18e-05	-0.817294	0.014	0.027	0.23673
Syt17	0.00054473	-0.815046	0.007	0.014	1
Fam234b	0.00526586	-0.813452	0.008	0.014	1
Ampd3	1.21e-05	-0.812989	0.017	0.031	0.242104
Lefty1	2.3e-11	-0.812325	0.035	0.064	4.61e-07
Gm13830	0.00199998	-0.811842	0.008	0.014	1
Rpl10a	2.43e-133	-0.811317	0.923	0.966	4.85e-129
Igsf9	0.0016665	-0.810856	0.006	0.012	1
Gm15721	0.00162642	-0.810469	0.005	0.011	1
Gm43254	0.00384705	-0.810429	0.008	0.014	1
Il17b	3.37e-20	-0.810082	0.062	0.117	6.74e-16
Clec14a	0.00202001	-0.80968	0.008	0.014	1
AW011738	1.47e-06	-0.809631	0.028	0.046	0.029423
Stk26	2.64e-14	-0.80861	0.041	0.078	5.27e-10
Hpgd	0.0486082	-0.808584	0.008	0.012	1
Sqle	3.77e-20	-0.807729	0.092	0.153	7.53e-16
Sdc1	3.89e-19	-0.807363	0.066	0.119	7.77e-15
Lgi2	0.0978155	-0.80695	0.007	0.01	1
Cd302	2.47e-49	-0.806792	0.168	0.3	4.94e-45
Gstm6	0.0109045	-0.806523	0.013	0.02	1
Fam78b	0.0018029	-0.802933	0.013	0.021	1
Ttll5	6.66e-10	-0.802843	0.032	0.058	1.33e-05
Setd4	0.0127948	-0.801932	0.007	0.012	1
Fbln2	2.51e-14	-0.801177	0.037	0.074	5.01e-10
Brip1	6.78e-33	-0.800852	0.112	0.203	1.35e-28
Itgb8	1.58e-16	-0.799664	0.043	0.085	3.15e-12
Olfml1	1.4e-09	-0.799401	0.034	0.06	2.8e-05
Capn6	0.000130489	-0.799156	0.012	0.022	1
Wisp2	4.76e-41	-0.799113	0.181	0.297	9.51e-37
Fabp3	2.73e-41	-0.798952	0.136	0.246	5.45e-37
Ptgfrn	1.93e-22	-0.798123	0.095	0.162	3.85e-18
Fam49a	4.97e-09	-0.797401	0.022	0.043	9.94e-05
Zfp869	0.00166669	-0.796746	0.007	0.013	1
Gm30556	2.43e-07	-0.796728	0.024	0.043	0.00485179
Tmem119	6.52e-06	-0.795741	0.018	0.032	0.130295
Scd2	5.49e-26	-0.795146	0.102	0.177	1.1e-21
Ibsp	1.53e-06	-0.795045	0.003	0.011	0.0306191
Xpnpep1	3.66e-32	-0.794793	0.119	0.209	7.32e-28
Slc43a2	0.0171145	-0.79368	0.006	0.011	1
Tmsb15l	0.00253847	-0.793098	0.005	0.01	1
Itpka	0.0030472	-0.791834	0.008	0.014	1
Msmo1	7.54e-40	-0.790676	0.197	0.314	1.51e-35
Per3	4.24e-13	-0.788003	0.044	0.08	8.47e-09
Hmgn2	2.35e-37	-0.787481	0.146	0.251	4.7e-33
Atp1b1	1.64e-46	-0.786978	0.148	0.272	3.29e-42
Plb1	2.85e-10	-0.785925	0.071	0.107	5.7e-06
C030037D09Rik	0.0155075	-0.785694	0.007	0.012	1
Tacc3	0.000268196	-0.78537	0.011	0.02	1
Thbd	6.34e-42	-0.7842	0.201	0.323	1.27e-37
Uap1l1	3.54e-13	-0.783037	0.042	0.078	7.07e-09
Pi16	1.21e-15	-0.781633	0.082	0.133	2.43e-11
Rnf213	3.75e-05	-0.780948	0.018	0.031	0.749293
Diras2	3.85e-07	-0.780159	0.015	0.031	0.00768866
Dio2	0.00168812	-0.779846	0.008	0.014	1
Exd1	0.000111211	-0.779565	0.009	0.019	1
Col15a1	1.48e-88	-0.779515	0.476	0.648	2.96e-84
Zfp677	5.37e-06	-0.77942	0.013	0.025	0.107353
2700012I20Rik	0.01986	-0.774211	0.007	0.011	1
Dynlt1b	0.0010282	-0.774042	0.013	0.022	1
Mmp2	5.87e-23	-0.773972	0.112	0.184	1.17e-18
Lnx1	4.2e-19	-0.770285	0.057	0.107	8.4e-15
Rinl	0.00822857	-0.769229	0.005	0.01	1
Zfp827	1.92e-12	-0.766061	0.039	0.073	3.85e-08
Them6	2.35e-08	-0.764647	0.019	0.039	0.000470051
2310002D06Rik	0.0103919	-0.764578	0.008	0.013	1
Alox12	9.21e-07	-0.763978	0.013	0.027	0.0183974
C77080	6.42e-05	-0.762734	0.007	0.016	1
Matn4	0.0159573	-0.75719	0.009	0.014	1
Tyro3	1.91e-05	-0.756193	0.017	0.03	0.381194
Stk10	9.95e-10	-0.755057	0.037	0.064	1.99e-05
Psmb8	6.82e-05	-0.754419	0.018	0.03	1
Ccnb1ip1	3.64e-05	-0.753356	0.006	0.015	0.72785
Lyz2	0.169765	-0.75328	0.013	0.017	1
Reep2	1.43e-10	-0.752713	0.032	0.06	2.86e-06
F13a1	0.00307909	-0.752644	0.008	0.014	1
Usp50	2.82e-26	-0.752434	0.102	0.179	5.64e-22
Ttc30a1	0.0282687	-0.751343	0.007	0.011	1
Phactr3	4.56e-05	-0.750537	0.013	0.025	0.912054
Abhd3	9.65e-07	-0.7486	0.024	0.042	0.0192813
Krt18	5.23e-27	-0.746251	0.113	0.194	1.05e-22
Trim34a	0.0228867	-0.744674	0.006	0.01	1
Malt1	3.56e-13	-0.744531	0.067	0.109	7.12e-09
Gm47689	2.83e-05	-0.743602	0.014	0.026	0.564877
Cmtr2	0.000843474	-0.740933	0.008	0.015	1
Hr	7.79e-21	-0.740559	0.077	0.138	1.56e-16
Cabcoco1	0.000286076	-0.739788	0.009	0.017	1
Podn	0.000379332	-0.73913	0.017	0.027	1
Zfp773	0.00966408	-0.737295	0.008	0.014	1
Dnajc12	0.000184815	-0.736877	0.021	0.033	1
P2rx6	0.0277927	-0.736791	0.006	0.01	1
Dbn1	4.04e-30	-0.73414	0.118	0.205	8.08e-26
Nrarp	0.182006	-0.733423	0.009	0.012	1
Tspyl3	0.000425971	-0.733403	0.01	0.018	1
Ntrk2	5.63e-08	-0.732392	0.037	0.061	0.0011242
Heg1	3.99e-18	-0.73135	0.082	0.138	7.97e-14
Hemk1	2.65e-06	-0.730523	0.016	0.031	0.0529865
Camk2b	5.55e-16	-0.730046	0.067	0.114	1.11e-11
Tcim	2.32e-13	-0.729665	0.064	0.105	4.64e-09
Zfp185	0.0110944	-0.729113	0.007	0.012	1
Gpnmb	0.00206259	-0.728573	0.006	0.013	1
Sp110	2.79e-20	-0.727289	0.065	0.121	5.59e-16
Syn1	5.06e-05	-0.7271	0.01	0.021	1
Gria3	0.000151602	-0.726499	0.019	0.031	1
Zfp626	6.28e-08	-0.725694	0.031	0.053	0.0012543
Fndc1	0.0384216	-0.723925	0.006	0.01	1
Stk17b	8.32e-35	-0.721453	0.182	0.289	1.66e-30
Ldhd	1.93e-05	-0.721227	0.016	0.029	0.385643
Lsp1	1.17e-25	-0.718736	0.116	0.195	2.34e-21
Stxbp6	4.75e-11	-0.718223	0.027	0.053	9.48e-07
Celsr2	1.12e-05	-0.716997	0.016	0.03	0.224062
Flnc	1.2e-29	-0.714699	0.16	0.253	2.41e-25
Nmral1	8.2e-11	-0.714553	0.042	0.073	1.64e-06
Gda	0.144869	-0.709977	0.01	0.013	1
4930417O22Rik	0.00682858	-0.709253	0.012	0.019	1
Wfikkn2	0.000207925	-0.707397	0.014	0.025	1
1810010H24Rik	0.000490131	-0.707274	0.011	0.02	1
Col6a1	4.53e-89	-0.707226	0.487	0.665	9.05e-85
Pcdhb22	4.78e-06	-0.705855	0.017	0.032	0.0955956
Olfr329-ps	1.23e-07	-0.704091	0.027	0.048	0.00246755
Pvt1	1.6e-08	-0.702483	0.028	0.051	0.000319789
Abca8a	2.03e-05	-0.702075	0.026	0.041	0.405196
Ldlr	3.65e-17	-0.702061	0.118	0.177	7.3e-13
Timp1	1.47e-11	-0.700279	0.067	0.107	2.94e-07
Rfx2	9.65e-07	-0.699276	0.027	0.046	0.0192938
Gtf2e1	1.07e-08	-0.698889	0.033	0.058	0.000213741
Npy4r	4.2e-09	-0.698359	0.023	0.045	8.4e-05
Eef1akmt4	0.00077256	-0.698226	0.012	0.021	1
Enpp5	3.06e-29	-0.698222	0.132	0.221	6.12e-25
Greb1l	2.56e-05	-0.697807	0.016	0.028	0.51197
Wnt5a	1.19e-08	-0.697102	0.033	0.057	0.000238556
Col6a2	1.89e-76	-0.696646	0.404	0.584	3.79e-72
Nudt10	5.26e-06	-0.695324	0.015	0.029	0.105079
Galnt16	9.51e-44	-0.693826	0.216	0.344	1.9e-39
Ints7	1.04e-06	-0.6934	0.035	0.055	0.0206944
Htra4	7.86e-06	-0.691865	0.018	0.032	0.157068
Il18	0.000180846	-0.690821	0.024	0.037	1
Pcbd1	0.00363823	-0.689909	0.01	0.017	1
Tmcc3	4.59e-38	-0.688324	0.172	0.285	9.16e-34
Gm16485	0.011501	-0.687809	0.007	0.012	1
Stc1	3.79e-06	-0.687497	0.019	0.034	0.075662
Espn	0.000337755	-0.687177	0.011	0.02	1
Nme5	5.8e-07	-0.686982	0.026	0.044	0.0115923
2700046G09Rik	0.0117198	-0.686467	0.006	0.011	1
Mvd	5.04e-05	-0.685615	0.019	0.032	1
Tctn1	1.02e-06	-0.684954	0.027	0.045	0.0204599
Lama2	6.39e-15	-0.684296	0.057	0.1	1.28e-10
Pik3r6	0.00944334	-0.684137	0.011	0.017	1
Cmtm3	4.04e-05	-0.68364	0.023	0.038	0.806633
Tmem181a	1.63e-21	-0.680735	0.09	0.155	3.26e-17
Aacs	6.45e-10	-0.679239	0.035	0.063	1.29e-05
Dpf1	6.28e-05	-0.678177	0.015	0.027	1
Lin7b	0.00264592	-0.677682	0.014	0.022	1
Gdf10	1.55e-09	-0.677176	0.057	0.09	3.1e-05
Comp	4.35e-06	-0.676638	0.04	0.06	0.0868475
Htatip2	6.99e-09	-0.676495	0.034	0.059	0.000139781
Pnma1	0.00444816	-0.676467	0.01	0.017	1
Ablim1	2.35e-11	-0.675425	0.047	0.08	4.71e-07
Nes	4.44e-53	-0.675394	0.208	0.356	8.88e-49
1700109H08Rik	0.0536085	-0.675112	0.006	0.01	1
Gldn	1.17e-23	-0.672208	0.105	0.178	2.33e-19
Olfml2a	5.33e-05	-0.671182	0.032	0.048	1
Ptprb	0.0464779	-0.670759	0.007	0.011	1
Angptl2	7.12e-30	-0.669765	0.151	0.246	1.42e-25
Tiam2	6.6e-06	-0.669572	0.011	0.024	0.131839
Lhpp	4.08e-12	-0.668893	0.054	0.091	8.16e-08
Htra1	1.63e-117	-0.668094	0.721	0.856	3.26e-113
Kcns3	1.96e-09	-0.667986	0.047	0.076	3.92e-05
Zfp385b	2.37e-07	-0.666957	0.022	0.04	0.00472823
Smoc1	1.07e-78	-0.666519	0.424	0.614	2.13e-74
Gm45605	0.0242059	-0.666485	0.008	0.013	1
Matn2	1.85e-23	-0.664566	0.12	0.196	3.69e-19
Prph	8.01e-09	-0.662984	0.007	0.022	0.000160135
Nol3	1.15e-06	-0.662626	0.023	0.04	0.0229863
Fbxo27	1.16e-08	-0.662086	0.029	0.053	0.000231689
Reep1	1.4e-15	-0.66185	0.074	0.123	2.8e-11
Sipa1l3	1.85e-06	-0.661254	0.02	0.037	0.0369296
4732491K20Rik	9.93e-07	-0.660759	0.023	0.041	0.0198545
Prss35	0.0220406	-0.659775	0.011	0.016	1
Nipsnap1	2.07e-12	-0.657498	0.043	0.078	4.14e-08
Lum	1.09e-18	-0.656964	0.195	0.274	2.18e-14
Gm49322	0.00487353	-0.655094	0.007	0.013	1
Clip4	3.18e-38	-0.654838	0.183	0.302	6.36e-34
Clec3b	3.61e-16	-0.654349	0.071	0.121	7.21e-12
Sobp	2.38e-21	-0.654109	0.087	0.151	4.76e-17
Arl5c	9.14e-07	-0.652633	0.022	0.04	0.0182649
Ccdc65	0.00394582	-0.652359	0.009	0.016	1
Unc93b1	8.18e-10	-0.651829	0.037	0.065	1.64e-05
Ddr2	4.28e-38	-0.651193	0.24	0.362	8.56e-34
Hacd4	2.18e-25	-0.650917	0.143	0.227	4.35e-21
Gas7	0.000580347	-0.649539	0.029	0.041	1
Tlr2	0.000166883	-0.649412	0.012	0.022	1
Slc38a1	9.27e-29	-0.64936	0.165	0.26	1.85e-24
Cerkl	0.000752704	-0.649083	0.011	0.019	1
Tmc4	0.00053326	-0.647303	0.022	0.033	1
3110070M22Rik	0.0020348	-0.646916	0.005	0.01	1
Stard6	0.00647793	-0.646834	0.006	0.011	1
Gm11266	0.00206727	-0.645601	0.021	0.03	1
Il13ra1	9.66e-13	-0.645364	0.061	0.101	1.93e-08
Manba	4.46e-18	-0.644001	0.075	0.13	8.91e-14
Kbtbd12	0.00181896	-0.642819	0.009	0.017	1
Thrsp	1.36e-24	-0.642693	0.112	0.188	2.71e-20
Dlx5	9.39e-07	-0.641068	0.014	0.029	0.0187659
Il17ra	0.011936	-0.640989	0.009	0.015	1
Wnt5b	0.000641143	-0.640798	0.018	0.028	1
St3gal4	7.66e-30	-0.63875	0.133	0.224	1.53e-25
Ccdc62	2.63e-05	-0.638249	0.016	0.029	0.526033
Cyb5rl	1.8e-05	-0.634307	0.016	0.029	0.35935
Sod3	1.74e-143	-0.632838	0.818	0.911	3.47e-139
Tcf19	1.01e-06	-0.631188	0.03	0.049	0.0202479
Acta1	0.857332	-0.630981	0.011	0.011	1
Col1a2	1.26e-175	-0.630858	0.863	0.95	2.53e-171
Rsl1	0.0422137	-0.630297	0.009	0.013	1
Sytl4	0.000434283	-0.629743	0.007	0.015	1
Gm16973	0.00344779	-0.628114	0.011	0.018	1
Col3a1	3.12e-178	-0.627489	0.907	0.97	6.24e-174
Chd3os	0.0620368	-0.627096	0.009	0.013	1
Zfp866	5.4e-09	-0.626839	0.035	0.061	0.000107997
Srl	0.0393314	-0.626829	0.01	0.015	1
Npr1	9.05e-54	-0.626518	0.309	0.463	1.81e-49
Tmod2	0.000651225	-0.626469	0.01	0.018	1
Setmar	0.0738331	-0.626382	0.007	0.01	1
Prr5l	0.0119965	-0.626165	0.013	0.019	1
Plaur	1.13e-08	-0.626145	0.055	0.085	0.000225972
Slc16a13	0.00157585	-0.625658	0.009	0.016	1
Tox2	4.43e-06	-0.625279	0.016	0.031	0.0884888
Gpsm2	9.65e-22	-0.624864	0.118	0.191	1.93e-17
B630019K06Rik	0.00106807	-0.624076	0.019	0.029	1
Tmem198b	1.66e-06	-0.623385	0.034	0.054	0.0331697
B3galt6	5.54e-11	-0.62333	0.043	0.075	1.11e-06
Chst3	1.47e-09	-0.623082	0.042	0.071	2.93e-05
Slc27a3	0.00609498	-0.622688	0.007	0.012	1
Tmem141	8.84e-26	-0.62209	0.155	0.242	1.77e-21
Tti2	1.62e-05	-0.621754	0.032	0.05	0.323272
Irx5	0.000140544	-0.621681	0.018	0.03	1
Rtl6	0.00825934	-0.621542	0.009	0.015	1
Tes	8.26e-51	-0.619027	0.307	0.455	1.65e-46
Ufsp1	3.18e-05	-0.618902	0.02	0.033	0.636081
Rbm4	0.00637688	-0.618517	0.014	0.021	1
Pxdn	8.46e-15	-0.618401	0.066	0.112	1.69e-10
Slc39a11	0.00150457	-0.617971	0.009	0.017	1
B230312C02Rik	0.020199	-0.616661	0.009	0.015	1
Gm26910	0.000872668	-0.616396	0.008	0.015	1
Olfr920	0.00648545	-0.614709	0.006	0.011	1
Paqr6	5.08e-20	-0.614388	0.123	0.192	1.01e-15
Ifi47	0.00606409	-0.61366	0.025	0.034	1
Uhrf1bp1	0.048411	-0.613569	0.007	0.011	1
Asb2	7.96e-68	-0.613552	0.351	0.532	1.59e-63
S100a10	5e-56	-0.613112	0.431	0.586	1e-51
Gm4419	0.00653348	-0.610692	0.01	0.016	1
Gm44751	0.0185446	-0.61059	0.006	0.01	1
Mndal	0.0375467	-0.609285	0.006	0.01	1
Nlk	1.78e-09	-0.608966	0.046	0.076	3.57e-05
Fdps	7.72e-29	-0.608346	0.227	0.33	1.54e-24
Ncam1	1.06e-125	-0.608108	0.694	0.86	2.11e-121
Apol6	9.82e-11	-0.60802	0.054	0.089	1.96e-06
Lyplal1	5.37e-15	-0.606857	0.088	0.14	1.07e-10
Adgrd1	0.0292364	-0.606685	0.014	0.019	1
Lsamp	0.0194556	-0.606011	0.009	0.013	1
Fam57a	0.0169722	-0.605694	0.012	0.017	1
Bche	1.65e-11	-0.605094	0.097	0.141	3.29e-07
Fbxo36	5.79e-07	-0.60489	0.027	0.047	0.0115735
Rtn4ip1	0.00391994	-0.604853	0.016	0.024	1
Dhcr24	4.57e-08	-0.603097	0.055	0.083	0.000912985
Helz2	0.00848044	-0.6029	0.013	0.02	1
Oasl2	0.057747	-0.602654	0.009	0.013	1
Cyp51	9.05e-16	-0.602431	0.098	0.153	1.81e-11
Armcx4	0.000130652	-0.601945	0.027	0.04	1
Sema3d	9.84e-38	-0.601654	0.217	0.337	1.97e-33
Gng7	0.00783532	-0.60129	0.013	0.019	1
B3galt4	0.00050529	-0.600266	0.016	0.027	1
Thbs3	1.51e-18	-0.59938	0.093	0.153	3.02e-14
C920021L13Rik	0.00957901	-0.599124	0.012	0.019	1
Gaa	2.35e-34	-0.598322	0.239	0.352	4.7e-30
Gli2	0.000481897	-0.598092	0.018	0.028	1
Erlin2	6.2e-08	-0.596928	0.048	0.074	0.00123812
Socs2	1.14e-55	-0.59692	0.32	0.488	2.27e-51
Lrrc75b	0.00901654	-0.596789	0.012	0.019	1
Vwa3b	0.0240005	-0.595618	0.009	0.014	1
Dok1	1.73e-18	-0.595534	0.106	0.168	3.46e-14
Ace	3.81e-51	-0.595441	0.277	0.428	7.62e-47
Ltk	0.00792162	-0.594596	0.006	0.011	1
1110008L16Rik	0.000777778	-0.594298	0.014	0.023	1
Angpt1	0.05456	-0.594223	0.006	0.01	1
Grem2	0.0320005	-0.593484	0.008	0.012	1
Mocos	0.00119025	-0.592694	0.01	0.018	1
Nudt7	1.69e-07	-0.59264	0.03	0.051	0.00337358
Col23a1	0.0103399	-0.5922	0.008	0.013	1
Ptx3	0.0187425	-0.591664	0.018	0.026	1
Tmem177	0.00131904	-0.591575	0.022	0.033	1
Rapgef4	8.72e-06	-0.591185	0.011	0.023	0.174305
Nudt1	0.00031296	-0.590242	0.022	0.034	1
Nbeal2	0.068066	-0.589414	0.008	0.012	1
Col14a1	1.32e-44	-0.58883	0.414	0.551	2.64e-40
Sparc	1.24e-211	-0.58725	0.989	0.997	2.47e-207
Zfp423	5.36e-08	-0.587188	0.036	0.06	0.00107135
Ank2	2.66e-11	-0.586996	0.098	0.142	5.32e-07
Tef	7.18e-16	-0.586979	0.084	0.136	1.43e-11
Cenpf	0.0274128	-0.586404	0.007	0.012	1
Nhlrc1	1.43e-06	-0.585411	0.023	0.041	0.0286213
Slc45a3	1.86e-06	-0.584304	0.042	0.064	0.0372713
Stard13	1.78e-10	-0.584303	0.069	0.107	3.55e-06
Foxl1	0.000909799	-0.583891	0.016	0.025	1
Artn	0.00216258	-0.583515	0.007	0.013	1
3830403N18Rik	0.0130585	-0.583126	0.009	0.014	1
9430037G07Rik	0.0022357	-0.582954	0.013	0.021	1
Rab4b	3.6e-12	-0.582691	0.053	0.09	7.2e-08
Rap1gap	0.00126239	-0.581799	0.016	0.025	1
Arel1	6.5e-06	-0.580953	0.023	0.04	0.129827
Col1a1	1.99e-138	-0.580201	0.842	0.94	3.97e-134
Zfp760	0.00012157	-0.579847	0.019	0.032	1
Egln3	4.61e-09	-0.577918	0.046	0.075	9.2e-05
Dusp14	2.36e-12	-0.577569	0.041	0.075	4.72e-08
Gucd1	1.86e-13	-0.576583	0.09	0.138	3.71e-09
Mindy4	0.000130575	-0.575278	0.016	0.028	1
Ccdc8	1.39e-09	-0.574788	0.048	0.079	2.77e-05
Pars2	0.000663854	-0.574395	0.016	0.026	1
Gm15337	0.028287	-0.574293	0.006	0.01	1
Srpx2	4.89e-05	-0.57417	0.028	0.044	0.97666
Adamts6	5.09e-14	-0.57157	0.076	0.123	1.02e-09
Col6a3	1.78e-24	-0.571514	0.224	0.318	3.56e-20
Deptor	0.000159099	-0.571342	0.022	0.035	1
Gpt	0.000948168	-0.571304	0.01	0.018	1
Fkbp1b	0.0197151	-0.571025	0.011	0.016	1
Slx4	0.00161781	-0.570268	0.013	0.021	1
Ltbp3	1.41e-70	-0.570107	0.52	0.687	2.82e-66
Aldh3b1	0.0206318	-0.569605	0.008	0.013	1
Lbp	0.0411117	-0.569396	0.015	0.02	1
Tap1	2.42e-05	-0.569114	0.021	0.036	0.484247
Sept4	4.85e-09	-0.568929	0.062	0.095	9.69e-05
Cstf2t	8.48e-12	-0.568468	0.062	0.101	1.69e-07
Exo5	0.000267464	-0.568229	0.012	0.021	1
Insig1	1.04e-19	-0.56745	0.189	0.267	2.08e-15
Gm45716	4.69e-08	-0.56713	0.058	0.086	0.000937409
Grin2b	0.015727	-0.566931	0.005	0.01	1
Loxl1	2.22e-64	-0.565184	0.502	0.66	4.43e-60
Ly6a	3.97e-07	-0.563974	0.05	0.075	0.00792793
Rap2c	6.52e-13	-0.56283	0.063	0.104	1.3e-08
D830036C21Rik	0.0221328	-0.562297	0.008	0.012	1
Rad51b	0.136258	-0.562223	0.007	0.01	1
Setd7	3.77e-30	-0.562095	0.227	0.333	7.53e-26
Zfp799	0.000737513	-0.561867	0.016	0.026	1
C1qtnf12	4.59e-10	-0.561769	0.084	0.122	9.17e-06
Hspb6	4.82e-114	-0.561595	0.822	0.899	9.63e-110
Pcdhb7	0.0628042	-0.561571	0.008	0.011	1
Tbp	0.000241201	-0.56116	0.039	0.055	1
Fam69b	5.55e-08	-0.560619	0.037	0.061	0.00110846
Alox5ap	3.24e-05	-0.560166	0.022	0.037	0.647779
Gm14418	0.00107223	-0.560109	0.022	0.032	1
Cd59b	3.75e-06	-0.56002	0.025	0.042	0.0749209
Zfp365	9.19e-18	-0.559477	0.11	0.173	1.84e-13
Zfp867	0.00191758	-0.558961	0.02	0.029	1
P2rx7	0.00305264	-0.55879	0.014	0.023	1
Ttpal	2.85e-08	-0.558584	0.034	0.058	0.000569512
Igsf8	9.86e-51	-0.558009	0.369	0.52	1.97e-46
Gm5113	0.000353943	-0.557336	0.015	0.025	1
Sh3pxd2a	1.63e-27	-0.557202	0.242	0.345	3.26e-23
Mief2	4.1e-07	-0.556615	0.037	0.059	0.00819745
Pex11a	0.00473289	-0.556261	0.016	0.024	1
Ranbp17	0.000222438	-0.555938	0.013	0.024	1
Mdk	4.9e-05	-0.555533	0.022	0.036	0.978277
Acot11	1.16e-13	-0.55547	0.072	0.117	2.31e-09
Mettl22	1.19e-07	-0.555035	0.054	0.081	0.00237971
Fam212b	1.74e-19	-0.554526	0.1	0.164	3.48e-15
Zfp990	0.0528812	-0.554309	0.01	0.015	1
Gm6277	4.42e-07	-0.554182	0.031	0.052	0.00884192
Samd5	0.00514131	-0.552847	0.012	0.019	1
Platr25	1.2e-06	-0.552686	0.034	0.055	0.023928
Actg2	8.73e-51	-0.55264	0.521	0.643	1.74e-46
Acss2	1.29e-11	-0.552381	0.06	0.098	2.57e-07
Csf2ra	0.000181807	-0.551407	0.023	0.036	1
Ephb6	1.07e-07	-0.551247	0.036	0.059	0.00213205
Cx3cl1	0.0587509	-0.551021	0.016	0.021	1
Tulp1	1.44e-06	-0.550708	0.029	0.048	0.0287406
Serpina3n	1.52e-05	-0.550538	0.036	0.054	0.302784
Ly6c1	1.17e-06	-0.550387	0.021	0.038	0.0233205
Myo18b	3.16e-08	-0.549665	0.04	0.066	0.000631796
Rwdd3	1.87e-07	-0.549302	0.029	0.05	0.00373264
Sp3os	3.92e-14	-0.54885	0.087	0.136	7.84e-10
Gm14399	0.00100257	-0.548354	0.017	0.026	1
Ralgds	0.000322642	-0.547165	0.016	0.026	1
Zfp174	0.227452	-0.54683	0.009	0.011	1
Zfp958	1.52e-05	-0.546818	0.028	0.045	0.302812
Rgs10	0.00198252	-0.546254	0.023	0.034	1
Smcr8	0.00437675	-0.546164	0.013	0.02	1
Bmp1	2.04e-21	-0.54552	0.137	0.213	4.08e-17
Zfp873	1.33e-05	-0.545054	0.027	0.044	0.264893
Mthfd1l	0.000202835	-0.544405	0.013	0.023	1
Itgb3	5.55e-19	-0.544385	0.135	0.205	1.11e-14
Plac9a	0.0264814	-0.544375	0.006	0.01	1
Dglucy	0.00268956	-0.544239	0.015	0.024	1
Tenm3	3.76e-07	-0.544185	0.032	0.053	0.00750823
Gamt	1.31e-37	-0.543895	0.338	0.463	2.62e-33
Zfp420	0.000154683	-0.542736	0.019	0.031	1
Gm4117	1.47e-08	-0.542144	0.059	0.09	0.00029287
Rab30	0.00119808	-0.542087	0.012	0.02	1
Prdm9	0.00308672	-0.541573	0.01	0.017	1
Fyb	0.00052308	-0.541139	0.019	0.03	1
Ctsb	5.19e-174	-0.540829	0.892	0.951	1.04e-169
Eda	0.116943	-0.540694	0.007	0.01	1
Prepl	0.000183471	-0.540584	0.027	0.041	1
Cyp4f14	0.0064165	-0.540454	0.009	0.015	1
Galnt17	0.00840133	-0.540303	0.011	0.017	1
Fbn1	3.46e-39	-0.540038	0.327	0.459	6.91e-35
Msi1	0.00190261	-0.539797	0.009	0.016	1
Coa7	0.000157262	-0.539596	0.022	0.035	1
AI429214	0.00560384	-0.539548	0.01	0.016	1
Taco1	0.00286751	-0.539277	0.011	0.018	1
Arap1	2.39e-08	-0.539017	0.065	0.097	0.000478339
Slc30a4	3.6e-11	-0.538692	0.092	0.134	7.19e-07
Acrbp	0.151902	-0.53778	0.008	0.011	1
Pcdhb19	0.00150785	-0.537291	0.009	0.017	1
6230400D17Rik	0.00382403	-0.537091	0.01	0.017	1
H2-M3	7.41e-05	-0.536485	0.023	0.037	1
Adam19	6.84e-08	-0.535543	0.059	0.087	0.00136692
Tyw3	0.0116631	-0.535459	0.02	0.028	1
Slc25a35	6.68e-10	-0.535307	0.067	0.102	1.34e-05
Zfp747	0.00116264	-0.535019	0.021	0.031	1
Ly6g6d	0.000449465	-0.534608	0.013	0.022	1
Gsdmd	0.0318151	-0.534347	0.012	0.017	1
Tram2	2.14e-11	-0.534224	0.079	0.121	4.29e-07
Gm340	0.00417231	-0.534174	0.006	0.012	1
Scn7a	0.00999565	-0.533813	0.015	0.022	1
Gm26782	0.000621293	-0.533165	0.029	0.041	1
Phgdh	5.85e-08	-0.532724	0.052	0.079	0.00116941
Ucp2	4.72e-15	-0.532679	0.05	0.093	9.44e-11
Arsa	8.7e-11	-0.532364	0.059	0.095	1.74e-06
Polr2l	4.64e-31	-0.532217	0.244	0.354	9.28e-27
Prune2	2.53e-08	-0.531755	0.071	0.103	0.00050595
Uchl1	1.07e-23	-0.531582	0.227	0.32	2.14e-19
Jpx	0.00201109	-0.530591	0.011	0.019	1
Il33	0.0120982	-0.530281	0.021	0.028	1
Rsad1	0.000159479	-0.529422	0.027	0.04	1
Tapbpl	1.76e-06	-0.528786	0.04	0.062	0.0351694
Lgr6	5.75e-38	-0.528603	0.305	0.436	1.15e-33
Dnase2a	1.5e-06	-0.528496	0.025	0.043	0.0300748
Nr1d1	1.09e-20	-0.528044	0.142	0.218	2.18e-16
Dapk1	4e-10	-0.527647	0.042	0.072	7.99e-06
Htr2a	0.000156291	-0.527551	0.026	0.04	1
Sphk1	0.00402601	-0.527257	0.016	0.024	1
Cables1	8.05e-13	-0.527231	0.088	0.135	1.61e-08
Cytl1	1.03e-05	-0.526952	0.031	0.049	0.205051
E230001N04Rik	0.00299345	-0.526293	0.011	0.018	1
Gm33023	0.0158401	-0.524681	0.011	0.017	1
Gnaz	1.16e-06	-0.524532	0.028	0.047	0.023094
Ngef	9.48e-12	-0.524403	0.049	0.084	1.89e-07
Mmachc	4.7e-06	-0.524202	0.03	0.048	0.0939674
Asah2	0.0520467	-0.524139	0.009	0.013	1
2810402E24Rik	0.00117365	-0.523103	0.019	0.029	1
Tspyl4	2.06e-07	-0.522724	0.056	0.083	0.00412436
Serpine2	1.65e-112	-0.522259	0.937	0.967	3.29e-108
Oscp1	4e-07	-0.521209	0.036	0.058	0.00799015
Sec11c	6.84e-44	-0.52085	0.39	0.527	1.37e-39
Dlgap1	5.3e-34	-0.519658	0.206	0.321	1.06e-29
Zfp142	0.000290073	-0.519633	0.032	0.046	1
Armcx6	0.000543227	-0.519584	0.016	0.026	1
Gm6169	0.000254442	-0.519022	0.024	0.037	1
Mov10	0.0731919	-0.518791	0.009	0.012	1
A130010J15Rik	0.00378514	-0.518321	0.022	0.032	1
Rhoq	1.32e-47	-0.517878	0.417	0.565	2.64e-43
Lonrf2	0.00510162	-0.517593	0.007	0.012	1
Slc7a2	3.61e-09	-0.517154	0.065	0.098	7.21e-05
Gm15417	3.34e-22	-0.516672	0.213	0.3	6.68e-18
Zfp979	0.000174996	-0.516273	0.018	0.03	1
Cdsn	0.00607804	-0.515317	0.012	0.019	1
Zfp932	4.3e-07	-0.512404	0.048	0.072	0.00858955
Trim7	3.99e-05	-0.512166	0.034	0.051	0.796779
Pqlc2	3.17e-05	-0.511865	0.027	0.043	0.633278
Hist1h1c	4.47e-20	-0.511749	0.239	0.323	8.93e-16
Slc35e2	0.00548682	-0.511749	0.028	0.038	1
Cep41	9.42e-06	-0.511161	0.033	0.051	0.188286
Bckdhb	5.33e-15	-0.510397	0.131	0.191	1.06e-10
Atp1a2	7.37e-49	-0.510327	0.385	0.541	1.47e-44
Abi3bp	1.29e-34	-0.510232	0.353	0.474	2.59e-30
Foxo1	6.07e-23	-0.509199	0.18	0.267	1.21e-18
A230050P20Rik	0.0319237	-0.508286	0.012	0.017	1
Sugct	0.00348258	-0.507213	0.025	0.035	1
Optc	7.7e-43	-0.507157	0.492	0.619	1.54e-38
Thy1	0.00224617	-0.507109	0.011	0.019	1
Rbm43	1.18e-09	-0.507089	0.059	0.092	2.36e-05
Cela1	0.00300423	-0.5069	0.016	0.024	1
2310015D24Rik	2.19e-06	-0.5067	0.035	0.055	0.0437109
Comtd1	4.59e-17	-0.505607	0.142	0.208	9.17e-13
Gstt2	5.68e-20	-0.505451	0.144	0.218	1.14e-15
Ggct	7.22e-06	-0.505382	0.028	0.045	0.144272
Kcnd3	6.26e-07	-0.505153	0.042	0.065	0.0125032
Gm14327	0.00174463	-0.504949	0.012	0.02	1
Lmtk3	0.000963318	-0.504595	0.01	0.018	1
Abhd8	2.69e-23	-0.504515	0.215	0.305	5.38e-19
Mfsd3	1.97e-06	-0.503797	0.03	0.049	0.0392995
Lzic	2.07e-07	-0.503365	0.055	0.082	0.00413164
Syt3	0.088965	-0.503204	0.008	0.012	1
Gm20400	0.0217717	-0.50309	0.016	0.022	1
Gm9008	8.46e-05	-0.502851	0.028	0.043	1
Gpm6b	4.78e-05	-0.502786	0.016	0.028	0.955526
Hexb	1.27e-59	-0.502392	0.499	0.651	2.54e-55
Pipox	0.00191341	-0.501293	0.019	0.029	1
Pcgf1	1.68e-09	-0.499745	0.046	0.076	3.35e-05
Samd10	2.05e-05	-0.499657	0.025	0.041	0.409967
Srgap3	0.000246209	-0.498995	0.03	0.045	1
Eppk1	0.000143764	-0.498619	0.031	0.046	1
Slc16a4	0.0233036	-0.498454	0.01	0.015	1
Gng10	4.6e-13	-0.498242	0.107	0.158	9.19e-09
Mpzl1	5.12e-10	-0.49819	0.067	0.103	1.02e-05
Scly	4.33e-08	-0.498123	0.053	0.081	0.000865836
Tmem132a	5.03e-15	-0.498072	0.154	0.217	1e-10
C920006O11Rik	0.00631824	-0.498066	0.02	0.029	1
Fan1	0.00143456	-0.497861	0.012	0.021	1
Gm15972	0.00319371	-0.497487	0.012	0.019	1
Ppp1r1a	0.000258755	-0.497475	0.027	0.04	1
Cyp27a1	6.22e-06	-0.496026	0.037	0.057	0.124227
Prmt6	6.05e-05	-0.495466	0.031	0.047	1
Tor3a	1.8e-11	-0.495291	0.089	0.133	3.59e-07
Dock11	3.9e-07	-0.495261	0.053	0.079	0.00779941
Nrgn	1.26e-05	-0.494811	0.081	0.107	0.252115
A430105I19Rik	1.48e-16	-0.494135	0.168	0.236	2.97e-12
Gpr4	0.00827264	-0.494109	0.008	0.014	1
Nkapl	0.0310063	-0.493807	0.008	0.012	1
Gm14410	0.0123802	-0.492666	0.006	0.01	1
F2r	5.3e-55	-0.492216	0.498	0.651	1.06e-50
Arhgef28	0.00613733	-0.491641	0.018	0.027	1
Gm14285	0.0253714	-0.490994	0.01	0.015	1
Qrsl1	0.00110721	-0.490913	0.034	0.047	1
0610040B10Rik	0.0124053	-0.490841	0.008	0.013	1
Zfp93	0.000933216	-0.490676	0.014	0.024	1
Gm4673	0.00990706	-0.490565	0.011	0.017	1
Pkmyt1	0.0772863	-0.489981	0.007	0.011	1
Gm14005	0.00825725	-0.489268	0.005	0.01	1
Gmip	0.00178036	-0.489144	0.024	0.034	1
Dcaf7	1.33e-08	-0.489141	0.062	0.093	0.000266682
Arhgef19	0.008809	-0.488127	0.009	0.015	1
4930447C04Rik	4.41e-05	-0.488038	0.032	0.048	0.880698
Gm45447	0.0118778	-0.487853	0.011	0.017	1
Vamp5	1.86e-16	-0.487509	0.148	0.216	3.73e-12
Pex5l	0.0178619	-0.486725	0.006	0.011	1
Rassf5	0.0332027	-0.485941	0.007	0.012	1
Casp7	6.9e-07	-0.485456	0.026	0.045	0.0137927
Slc26a6	0.00777532	-0.48534	0.014	0.021	1
Atp6v0e2	2.19e-12	-0.485093	0.085	0.131	4.38e-08
Ptgr1	6.54e-11	-0.484812	0.079	0.119	1.31e-06
Gpx7	2.99e-21	-0.484806	0.154	0.234	5.97e-17
Zfp239	0.00764096	-0.48476	0.016	0.023	1
Gm17354	0.00704202	-0.484617	0.018	0.026	1
Fbxl22	1.8e-55	-0.484314	0.612	0.736	3.59e-51
Fam185a	5.47e-05	-0.483722	0.034	0.05	1
Prdm6	2.78e-30	-0.483604	0.301	0.415	5.55e-26
Gm20498	4.25e-06	-0.482912	0.035	0.055	0.0849226
Kdm1b	0.000249727	-0.482667	0.03	0.045	1
Armc9	2.15e-06	-0.482617	0.039	0.06	0.042869
Ltbp2	6.56e-08	-0.48241	0.112	0.149	0.00131104
Bpgm	2.19e-09	-0.482079	0.082	0.119	4.37e-05
Prelp	2.84e-78	-0.480376	0.675	0.808	5.68e-74
Slc2a12	5.53e-06	-0.479946	0.034	0.053	0.110533
2510009E07Rik	3.38e-10	-0.478809	0.082	0.122	6.76e-06
Klc3	1.6e-13	-0.477879	0.083	0.131	3.21e-09
Unc119b	1.34e-05	-0.477737	0.032	0.05	0.267801
Pigs	8.87e-12	-0.477403	0.096	0.141	1.77e-07
Mtx3	0.00462892	-0.477048	0.02	0.029	1
Arl10	2.34e-07	-0.477022	0.036	0.059	0.00468392
S100b	0.0784355	-0.476463	0.013	0.017	1
Hist2h2be	2.41e-05	-0.476058	0.027	0.043	0.481695
Zfp3	0.0344026	-0.475638	0.015	0.021	1
Flt3l	0.000108305	-0.474715	0.032	0.048	1
Chic1	1.29e-08	-0.474521	0.063	0.094	0.000257445
Ptpn3	2.26e-07	-0.47387	0.035	0.058	0.00451318
Xlr	0.0131625	-0.472872	0.016	0.023	1
Nat10	3.57e-07	-0.472214	0.053	0.079	0.00713019
Nhs	0.000992975	-0.471942	0.03	0.042	1
Zfp995	0.000103133	-0.471844	0.02	0.033	1
Prkab2	1.41e-16	-0.471658	0.135	0.201	2.81e-12
Bicc1	0.0789294	-0.471607	0.042	0.049	1
Bdh2	0.0781892	-0.470881	0.007	0.011	1
Hist1h2be	0.000447981	-0.470507	0.019	0.03	1
Chrna1os	1.2e-05	-0.470419	0.027	0.043	0.240141
Dusp16	2.94e-05	-0.470097	0.056	0.077	0.588394
Flrt2	0.00548534	-0.469845	0.013	0.02	1
Als2	0.395744	-0.469818	0.01	0.012	1
Gsn	9.5e-78	-0.469425	0.939	0.969	1.9e-73
Slc22a17	1.51e-07	-0.469336	0.061	0.089	0.00302733
Xpo1	6.3e-17	-0.468005	0.156	0.224	1.26e-12
Epha1	6.17e-07	-0.467994	0.053	0.079	0.0123325
Gm32352	0.00308309	-0.467784	0.017	0.026	1
Dcaf4	0.000206961	-0.467561	0.023	0.036	1
Pcdhgc3	0.611562	-0.467551	0.014	0.016	1
Mdga1	3.12e-11	-0.466597	0.048	0.082	6.23e-07
Bmp3	2.48e-26	-0.464739	0.166	0.259	4.95e-22
Angptl4	0.000711363	-0.464565	0.021	0.033	1
Smoc2	0.000577515	-0.464448	0.063	0.081	1
Xaf1	5.05e-06	-0.464201	0.077	0.104	0.101005
Mmd	6.18e-32	-0.463537	0.313	0.435	1.24e-27
Slc15a2	0.000205029	-0.462353	0.032	0.047	1
Gm16845	0.0421115	-0.462086	0.014	0.02	1
2700038G22Rik	4.29e-08	-0.461871	0.04	0.065	0.000857444
Proca1	0.00202553	-0.46162	0.011	0.019	1
Stat5a	1.21e-08	-0.461593	0.062	0.093	0.000241562
Echdc2	8.36e-12	-0.461382	0.099	0.145	1.67e-07
Hmgcs1	2.33e-20	-0.461127	0.315	0.406	4.65e-16
Prps1l3	0.000249787	-0.461056	0.026	0.039	1
Tmem18	1.32e-16	-0.460648	0.138	0.204	2.63e-12
Rnf113a2	2.88e-06	-0.460493	0.056	0.08	0.0576201
Krt10	7.1e-11	-0.459439	0.117	0.164	1.42e-06
Tet1	3.56e-05	-0.459366	0.057	0.078	0.710764
Zkscan8	7.6e-06	-0.459107	0.044	0.065	0.151942
Tesk2	0.00202262	-0.458869	0.013	0.021	1
Gpd2	4.01e-14	-0.457732	0.085	0.135	8.02e-10
Igip	6.46e-08	-0.45773	0.068	0.099	0.00129029
Acot6	0.00176085	-0.457442	0.014	0.022	1
Rep15	0.0439215	-0.45696	0.009	0.013	1
Rgs2	9.09e-15	-0.456929	0.064	0.11	1.82e-10
Rpusd3	0.0205067	-0.456621	0.021	0.029	1
Atrnl1	2.23e-09	-0.456604	0.071	0.107	4.46e-05
Col4a6	1.2e-30	-0.456256	0.345	0.462	2.39e-26
Polr3h	2.85e-08	-0.455786	0.075	0.108	0.000569518
Gm45871	0.00037631	-0.455386	0.02	0.031	1
Zswim7	8.26e-07	-0.455183	0.049	0.074	0.0165172
Scyl2	1.16e-06	-0.454837	0.043	0.066	0.0232803
Zfyve28	0.00486198	-0.454501	0.011	0.018	1
AL591952.3	0.00142282	-0.454463	0.013	0.021	1
Tex9	0.000357145	-0.453676	0.026	0.039	1
Mn1	1.06e-39	-0.453288	0.301	0.44	2.13e-35
Prnp	3.06e-31	-0.453097	0.369	0.485	6.11e-27
Txnl4b	0.00168168	-0.45289	0.02	0.03	1
Mgst1	1.7e-34	-0.452588	0.255	0.385	3.39e-30
Tesc	1.84e-21	-0.452551	0.172	0.254	3.68e-17
Cygb	5.22e-05	-0.451883	0.065	0.087	1
6030443J06Rik	0.00911371	-0.451791	0.009	0.015	1
2700097O09Rik	1.08e-07	-0.451612	0.04	0.064	0.00216103
Krt8	0.130471	-0.45145	0.01	0.013	1
Ccnj	0.00247395	-0.451356	0.016	0.025	1
Hnmt	7.99e-10	-0.451286	0.076	0.113	1.6e-05
Dnah8	0.175723	-0.450965	0.007	0.01	1
Cbr3	3.63e-05	-0.450446	0.04	0.059	0.724908
Smim20	7.45e-18	-0.450375	0.181	0.257	1.49e-13
Ppic	1.77e-33	-0.45007	0.386	0.518	3.54e-29
H1f0	4.64e-25	-0.449599	0.342	0.448	9.28e-21
Gm5141	0.00212218	-0.449534	0.018	0.028	1
Itga2b	0.0108823	-0.449132	0.02	0.027	1
Zfp518a	0.00036544	-0.44907	0.026	0.039	1
Robo1	0.0150763	-0.448876	0.016	0.023	1
Pigm	5.39e-06	-0.448381	0.038	0.058	0.107646
Dhrs7	1.15e-30	-0.448355	0.336	0.455	2.31e-26
Shroom3	2.27e-09	-0.447768	0.081	0.119	4.54e-05
Pdgfrl	9.43e-17	-0.447662	0.147	0.214	1.88e-12
Zfp641	0.00738471	-0.447477	0.014	0.021	1
Apol7d	0.107574	-0.447387	0.012	0.016	1
Xk	1.79e-20	-0.447345	0.203	0.29	3.58e-16
Fam111a	0.00454959	-0.447242	0.012	0.019	1
Sdhaf4	2.62e-17	-0.447098	0.17	0.243	5.23e-13
Dtx1	0.0176919	-0.447036	0.006	0.011	1
Rdh5	2.21e-10	-0.447027	0.075	0.114	4.42e-06
Zfp758	0.000282564	-0.446992	0.027	0.04	1
Cradd	4.14e-10	-0.446902	0.08	0.12	8.27e-06
Synpo2l	0.00686828	-0.446784	0.027	0.036	1
Eif5a2	5.47e-06	-0.446677	0.05	0.073	0.109263
Dram1	7.17e-08	-0.446668	0.066	0.097	0.001433
Rgs19	9.81e-09	-0.446416	0.051	0.08	0.000196055
D130040H23Rik	0.00334313	-0.445676	0.015	0.023	1
Bend6	2.46e-06	-0.445598	0.035	0.055	0.0491941
Cldn22	4.51e-08	-0.445458	0.049	0.077	0.000901343
Zfp287	0.000429905	-0.445287	0.019	0.03	1
Snx10	4.03e-14	-0.445026	0.11	0.165	8.05e-10
Coq3	9e-07	-0.444824	0.035	0.056	0.0179916
Wdr54	0.00205983	-0.443791	0.012	0.02	1
Erg28	2.15e-23	-0.443731	0.212	0.306	4.3e-19
Ramp2	0.00033618	-0.443264	0.021	0.033	1
Zfp612	9.01e-13	-0.443161	0.11	0.161	1.8e-08
AC163032.1	0.0702618	-0.442977	0.01	0.014	1
Zik1	0.156545	-0.442819	0.012	0.015	1
Wipf1	3.4e-15	-0.442135	0.159	0.224	6.8e-11
Sfxn4	0.000241034	-0.442128	0.033	0.048	1
A930033H14Rik	1.21e-05	-0.441888	0.036	0.055	0.241905
Msto1	7e-06	-0.441808	0.053	0.076	0.139827
Glb1l2	4.17e-06	-0.44172	0.032	0.052	0.0832391
Elp6	4.95e-06	-0.441671	0.038	0.058	0.0989365
Siah1b	0.00221084	-0.441608	0.022	0.032	1
Srxn1	1.11e-09	-0.440871	0.079	0.117	2.21e-05
Hivep3	1.21e-08	-0.440669	0.074	0.108	0.000241766
Kdelr3	4.68e-28	-0.440668	0.305	0.415	9.36e-24
Ttc39c	0.0012099	-0.440139	0.02	0.03	1
Gm5784	0.0829321	-0.440131	0.011	0.015	1
Rreb1	0.000337187	-0.440098	0.035	0.05	1
Parp10	0.000131277	-0.440053	0.019	0.031	1
D16Ertd472e	1.61e-06	-0.439986	0.052	0.077	0.0321422
Osbpl7	0.00798994	-0.439718	0.019	0.027	1
Xrcc2	0.0454017	-0.43927	0.01	0.015	1
Recql5	0.00031293	-0.439204	0.023	0.035	1
Gpr157	0.0834493	-0.439007	0.008	0.011	1
Pqlc3	2.15e-18	-0.438845	0.167	0.243	4.31e-14
Ctsc	3.41e-19	-0.438706	0.209	0.293	6.81e-15
Pcbp3	2.24e-08	-0.438624	0.047	0.075	0.000447772
Immp2l	0.0355751	-0.438619	0.012	0.017	1
Olfr330	0.0033845	-0.437753	0.018	0.027	1
Tmem216	1.51e-09	-0.437514	0.084	0.123	3.01e-05
Fkbp10	1.83e-23	-0.437447	0.267	0.365	3.66e-19
Cyb561	6.41e-19	-0.437401	0.169	0.246	1.28e-14
Smim8	6.04e-14	-0.437388	0.158	0.22	1.21e-09
Dach1	0.00925842	-0.436719	0.013	0.019	1
Cebpzos	4.73e-10	-0.436094	0.086	0.126	9.45e-06
Gspt2	6.74e-06	-0.43607	0.035	0.054	0.134655
Gm16794	0.0952182	-0.435901	0.007	0.01	1
Sh3d19	6.78e-14	-0.435872	0.106	0.159	1.35e-09
Shroom4	0.0135698	-0.435791	0.013	0.02	1
Grtp1	1.98e-06	-0.435538	0.058	0.083	0.0395773
3632451O06Rik	1.51e-07	-0.434936	0.037	0.061	0.00302734
Traf3	0.000174786	-0.434869	0.063	0.083	1
Zfp629	0.00268178	-0.434425	0.017	0.025	1
Slc27a1	2.9e-08	-0.434295	0.073	0.106	0.00058055
Nlrp10	0.0915832	-0.433969	0.007	0.011	1
C1qtnf2	5.88e-27	-0.433701	0.313	0.424	1.17e-22
Pon3	3.66e-15	-0.433423	0.186	0.253	7.31e-11
Plekhb1	0.0563962	-0.433314	0.006	0.01	1
Gm45076	0.0241368	-0.432826	0.017	0.024	1
Sned1	0.00237629	-0.43257	0.013	0.02	1
Zfp963	0.0183499	-0.432503	0.014	0.02	1
Heatr1	0.0256601	-0.432029	0.024	0.032	1
Rab32	1.17e-05	-0.432002	0.035	0.054	0.233461
Fasn	3.81e-06	-0.431705	0.06	0.085	0.076176
Car11	6.14e-13	-0.431578	0.139	0.195	1.23e-08
Slc41a2	0.000262426	-0.431557	0.033	0.047	1
Ahcy	0.0152032	-0.430708	0.014	0.021	1
Rcn1	3.3e-18	-0.429755	0.222	0.303	6.6e-14
Abat	9.77e-11	-0.42964	0.082	0.123	1.95e-06
Rsph3a	0.000403793	-0.429522	0.018	0.03	1
Prex1	0.00290472	-0.429366	0.009	0.016	1
Rab10os	8.64e-11	-0.429211	0.087	0.13	1.73e-06
Commd5	0.00118889	-0.429122	0.023	0.034	1
Man2c1os	0.126721	-0.4291	0.008	0.011	1
Dctpp1	7.62e-10	-0.428568	0.075	0.112	1.52e-05
1810062O18Rik	0.184986	-0.428337	0.009	0.012	1
Arl5b	1.17e-07	-0.42823	0.049	0.076	0.00233531
Zfp583	0.0190645	-0.428132	0.018	0.025	1
Pfkfb3	1.64e-08	-0.4279	0.061	0.092	0.000327166
Tppp	3.82e-05	-0.427616	0.02	0.034	0.763361
Ankmy1	0.000554955	-0.427539	0.037	0.051	1
Cenpl	0.0535563	-0.427521	0.011	0.016	1
Tjp2	1.59e-07	-0.427203	0.063	0.092	0.00318073
Pex12	4.18e-07	-0.427135	0.042	0.066	0.00835264
Arhgap42	0.0233703	-0.427009	0.014	0.02	1
Slc30a7	1.31e-07	-0.426906	0.074	0.106	0.00261051
Hinfp	0.00187198	-0.426518	0.027	0.039	1
Ipo11	0.000674503	-0.426384	0.025	0.037	1
Slc36a3os	0.176853	-0.425985	0.012	0.015	1
Col5a1	3.46e-30	-0.425793	0.371	0.495	6.92e-26
Ttc12	1.29e-11	-0.425517	0.079	0.122	2.58e-07
Slc46a3	0.0610233	-0.42548	0.007	0.01	1
Ikzf2	4.49e-08	-0.424992	0.076	0.109	0.00089773
Tmed1	6.65e-18	-0.424876	0.194	0.27	1.33e-13
Loxl3	1.89e-17	-0.424812	0.141	0.211	3.77e-13
Znrd1as	2.63e-05	-0.42473	0.05	0.071	0.525985
Lgals3bp	0.0413299	-0.424438	0.036	0.044	1
Nhsl2	2.53e-13	-0.424163	0.101	0.152	5.05e-09
Vav3	1.55e-06	-0.424153	0.044	0.066	0.0309758
Usp24	0.000297166	-0.424133	0.054	0.072	1
Rwdd2b	0.0662445	-0.423766	0.012	0.016	1
Agrn	1.85e-13	-0.42304	0.123	0.178	3.71e-09
Glt8d2	0.0613605	-0.422818	0.008	0.012	1
1190007I07Rik	6.23e-09	-0.422437	0.078	0.114	0.000124442
Nfkbie	0.102249	-0.422343	0.008	0.011	1
Gnpda1	6.07e-08	-0.422336	0.054	0.083	0.00121254
Gm47469	0.000352113	-0.421743	0.024	0.037	1
Tbx3	0.125452	-0.421004	0.022	0.027	1
Usp35	0.024587	-0.420536	0.019	0.026	1
Rfx5	9.99e-05	-0.419935	0.03	0.045	1
Mcm6	0.31895	-0.41947	0.012	0.014	1
Gm10399	0.0517596	-0.419407	0.009	0.013	1
Ctnnb1	6.34e-71	-0.41914	0.717	0.841	1.27e-66
Mnd1	0.000600986	-0.418894	0.022	0.034	1
Akap5	3.86e-10	-0.418665	0.042	0.072	7.72e-06
Cacna1c	1.32e-09	-0.418567	0.064	0.099	2.64e-05
Alg14	1.5e-17	-0.418439	0.182	0.258	3e-13
Smyd3	1.38e-05	-0.418434	0.037	0.056	0.275469
Chrd	8.88e-07	-0.417725	0.062	0.089	0.0177472
Pik3r4	0.000180933	-0.417723	0.046	0.064	1
Fads2	0.00203888	-0.417673	0.028	0.039	1
Unc119	5.84e-18	-0.417601	0.239	0.319	1.17e-13
Dnajc16	0.00257142	-0.417139	0.02	0.029	1
Atr	0.000609538	-0.416725	0.054	0.071	1
Unc5d	0.0434113	-0.416413	0.012	0.016	1
Klf8	0.00355604	-0.416181	0.018	0.027	1
Adat2	2.8e-08	-0.415972	0.076	0.109	0.000559267
Gja6	7.99e-05	-0.415809	0.036	0.052	1
Pthlh	0.000562302	-0.415634	0.005	0.011	1
Cbs	0.063918	-0.415171	0.015	0.02	1
Prdm16	3.46e-11	-0.41509	0.117	0.165	6.92e-07
Gm11837	0.0164774	-0.414891	0.024	0.032	1
Hoxb3os	6e-21	-0.414405	0.199	0.285	1.2e-16
Gas6	5.97e-60	-0.414278	0.798	0.889	1.19e-55
Ydjc	0.0608881	-0.414171	0.007	0.01	1
Arhgef4	0.0688794	-0.413737	0.007	0.011	1
Acad10	0.155628	-0.413272	0.013	0.016	1
Cmtm8	3.44e-08	-0.413182	0.056	0.085	0.000687849
Msrb1	8.19e-57	-0.413147	0.75	0.834	1.64e-52
Zfp281	1.68e-15	-0.413012	0.134	0.198	3.37e-11
Gstm5	8.36e-25	-0.4124	0.257	0.359	1.67e-20
Tspan7	2.3e-17	-0.412263	0.223	0.303	4.6e-13
Ankrd13b	5.36e-05	-0.412217	0.028	0.043	1
Coro2b	0.13828	-0.412066	0.008	0.01	1
Rfc5	0.000751895	-0.411835	0.034	0.048	1
Osbpl3	1.31e-20	-0.411721	0.242	0.33	2.62e-16
Efna1	0.00313289	-0.411694	0.016	0.024	1
Itga5	2.59e-14	-0.411446	0.238	0.308	5.17e-10
Cdr2l	0.000227184	-0.411238	0.033	0.048	1
Zfp748	0.0267992	-0.410887	0.01	0.015	1
Def8	2.87e-06	-0.41088	0.055	0.079	0.0573684
Tbc1d31	0.0493704	-0.410854	0.007	0.011	1
Lamc1	1.22e-22	-0.410578	0.262	0.358	2.44e-18
Ctsh	2.76e-30	-0.410557	0.403	0.526	5.51e-26
Ift122	0.000161787	-0.410444	0.037	0.054	1
Capn9	0.153905	-0.410081	0.009	0.011	1
Mettl27	0.000237551	-0.409972	0.042	0.059	1
B3gnt8	7.7e-07	-0.409826	0.039	0.061	0.0153809
Gm20632	0.000323901	-0.409628	0.024	0.036	1
St6galnac4	8e-13	-0.409606	0.111	0.164	1.6e-08
Sh3bp5	0.028109	-0.409571	0.015	0.021	1
Eml5	0.0097498	-0.409553	0.013	0.02	1
Zfp784	0.116632	-0.409354	0.007	0.01	1
Rem1	0.00311358	-0.408481	0.017	0.026	1
Vamp1	0.0329425	-0.408463	0.016	0.021	1
Fam118b	2.71e-06	-0.408339	0.055	0.08	0.0541206
Ercc2	0.00384325	-0.408113	0.028	0.038	1
Fuca2	5.7e-06	-0.407841	0.061	0.086	0.113831
Nipal3	0.00012407	-0.407576	0.034	0.049	1
Slc12a7	0.000257458	-0.407407	0.025	0.039	1
Zfp46	0.00585242	-0.407276	0.026	0.035	1
Fkbp11	1.01e-07	-0.407187	0.069	0.1	0.0020158
Laptm4b	1.22e-23	-0.406999	0.275	0.377	2.44e-19
Lysmd2	1.04e-19	-0.406962	0.203	0.289	2.09e-15
Tsr2	1.06e-05	-0.406759	0.069	0.093	0.211665
1810021B22Rik	0.0218463	-0.406703	0.017	0.024	1
Edem3	0.00010743	-0.406697	0.07	0.091	1
Zfp940	0.0305265	-0.406538	0.007	0.011	1
Shisa4	5.12e-43	-0.406468	0.573	0.704	1.02e-38
AW146154	0.00014073	-0.406405	0.029	0.043	1
9430038I01Rik	0.000334055	-0.406342	0.042	0.058	1
Ndrg4	1.75e-07	-0.406001	0.065	0.094	0.00350106
Esam	3.07e-12	-0.406001	0.106	0.156	6.14e-08
Scrn2	2.19e-06	-0.405425	0.044	0.067	0.0438535
Abcg2	0.000457549	-0.404268	0.047	0.063	1
Acsf2	7.85e-05	-0.403893	0.035	0.052	1
Kdelc1	1.5e-10	-0.403648	0.098	0.142	2.99e-06
Gm9958	0.114144	-0.403614	0.008	0.011	1
Zfp59	0.0260105	-0.40333	0.008	0.012	1
Gm37494	5.89e-06	-0.403298	0.088	0.116	0.117718
Dynlt1a	9.32e-09	-0.403293	0.08	0.116	0.000186299
Trim39	2.46e-05	-0.403217	0.071	0.095	0.492237
Rnf113a1	0.0672467	-0.403203	0.012	0.017	1
Il15	0.037703	-0.402836	0.014	0.019	1
Ccdc71	5.85e-08	-0.402561	0.07	0.101	0.00116893
Zfp956	0.253043	-0.402109	0.012	0.015	1
Prpsap2	3.63e-07	-0.401678	0.066	0.095	0.00726361
Tbcd	0.00173898	-0.401633	0.024	0.035	1
Hexa	7.76e-24	-0.401549	0.363	0.467	1.55e-19
Prkci	1.79e-08	-0.401226	0.116	0.156	0.000358393
Cdk5rap1	0.000102117	-0.400665	0.035	0.051	1
A330041J22Rik	0.00611772	-0.400421	0.014	0.022	1
Pamr1	1.55e-17	-0.400333	0.19	0.265	3.11e-13
Hspa1b	9.8e-45	-0.400311	0.508	0.649	1.96e-40
BC048403	0.00972335	-0.399868	0.016	0.023	1
Klhl29	0.0113738	-0.399811	0.011	0.017	1
Pfn2	5.81e-21	-0.399809	0.176	0.261	1.16e-16
Adamtsl4	2.31e-05	-0.399804	0.077	0.101	0.460712
Il1rap	0.000221605	-0.399537	0.03	0.044	1
Hsf4	0.00114375	-0.399265	0.017	0.027	1
2410131K14Rik	0.000179713	-0.3992	0.038	0.054	1
Dtx3l	1.54e-08	-0.399172	0.054	0.084	0.00030753
Gm48882	1.86e-05	-0.398569	0.043	0.063	0.371558
Col12a1	0.0167632	-0.398113	0.012	0.018	1
Gtpbp8	4.63e-05	-0.397732	0.051	0.071	0.926007
Bysl	3.83e-08	-0.397649	0.085	0.12	0.000765588
Hid1	1.14e-05	-0.3975	0.041	0.061	0.228045
6430573P05Rik	0.000949584	-0.397297	0.023	0.035	1
Pigw	0.0230701	-0.39707	0.011	0.016	1
Naaa	1.12e-07	-0.397054	0.075	0.106	0.00223592
Apobec3	3.83e-06	-0.397019	0.048	0.07	0.0766084
Pcdhb13	0.180464	-0.396974	0.013	0.016	1
Hyal1	7.36e-07	-0.396777	0.051	0.076	0.0147124
Tomm40l	1.54e-06	-0.396713	0.081	0.109	0.0308366
Rdm1	3.19e-13	-0.396655	0.165	0.226	6.37e-09
Sh3rf2	0.00173727	-0.396549	0.037	0.05	1
Tmem87a	9.55e-09	-0.396406	0.099	0.138	0.000190946
Arsb	5.2e-07	-0.39578	0.056	0.082	0.0103919
Arntl2	0.0145929	-0.395651	0.008	0.013	1
Fkbpl	0.00809585	-0.395176	0.022	0.03	1
Rab36	0.0124734	-0.394726	0.017	0.025	1
Mtrr	0.000135119	-0.394628	0.045	0.063	1
Nectin1	0.034451	-0.394602	0.014	0.019	1
Ikbke	0.0350386	-0.394546	0.011	0.016	1
6330403L08Rik	1.15e-06	-0.394294	0.053	0.078	0.0230024
Chac2	2.93e-06	-0.394034	0.059	0.084	0.0586322
Nudt14	8.57e-06	-0.393987	0.066	0.091	0.171319
Slc25a23	4.16e-20	-0.393234	0.258	0.347	8.32e-16
Plxdc2	1.92e-33	-0.393215	0.38	0.513	3.83e-29
Myrf	3.17e-08	-0.393099	0.096	0.132	0.000633022
Ptprg	5.21e-05	-0.393098	0.066	0.088	1
Rab26	0.0656481	-0.3929	0.013	0.017	1
Hspa14	7.52e-15	-0.392335	0.173	0.241	1.5e-10
Tpd52	2.39e-23	-0.391829	0.281	0.382	4.77e-19
Zfp329	1.48e-11	-0.391436	0.132	0.184	2.96e-07
Mgp	7.85e-75	-0.390659	0.982	0.995	1.57e-70
Ypel4	2.43e-05	-0.390469	0.035	0.052	0.485282
Tigar	0.00677839	-0.390368	0.028	0.038	1
Cpeb1	7.96e-05	-0.390191	0.044	0.062	1
Sil1	5.69e-12	-0.390176	0.111	0.16	1.14e-07
Adamts10	2.53e-19	-0.390098	0.221	0.308	5.05e-15
Ccl4	0.553828	-0.390001	0.01	0.011	1
Thbs2	9.04e-12	-0.389809	0.118	0.168	1.81e-07
Cryzl2	5.4e-09	-0.389724	0.05	0.08	0.000107897
Map7d3	0.0290877	-0.389645	0.022	0.028	1
Pi15	3.99e-33	-0.389637	0.534	0.655	7.97e-29
Tpcn1	0.000232148	-0.389571	0.048	0.066	1
Thnsl1	4.69e-06	-0.388992	0.041	0.062	0.0936612
Cgref1	7.3e-05	-0.388677	0.037	0.054	1
Rps6ka3	1.63e-07	-0.388512	0.09	0.123	0.00325528
Lmln	0.197403	-0.387839	0.011	0.013	1
Tbc1d7	1.85e-10	-0.387541	0.096	0.139	3.69e-06
9330179D12Rik	0.00372925	-0.38753	0.021	0.03	1
Ccdc69	1.74e-10	-0.386987	0.119	0.166	3.48e-06
Gm10138	0.233732	-0.386815	0.01	0.013	1
Mgat5	1.83e-05	-0.386774	0.056	0.079	0.366314
Gm10273	0.0584178	-0.386493	0.008	0.012	1
Rgs4	1.89e-12	-0.386408	0.195	0.258	3.79e-08
Bmyc	1.71e-22	-0.386353	0.414	0.518	3.42e-18
5430403G16Rik	0.000121684	-0.386186	0.05	0.068	1
Polr2d	1.9e-18	-0.386085	0.22	0.304	3.8e-14
Mbd5	1.37e-08	-0.385864	0.082	0.117	0.000274748
Galnt18	0.000151661	-0.385843	0.045	0.063	1
Abcg4	0.00727052	-0.385761	0.023	0.032	1
Fgfrl1	1.9e-11	-0.385649	0.204	0.262	3.79e-07
Olfml2b	7.18e-25	-0.385592	0.352	0.463	1.44e-20
Gab2	2.41e-09	-0.38505	0.104	0.146	4.82e-05
Fubp1	6.52e-18	-0.384583	0.236	0.318	1.3e-13
Phospho2	1.27e-08	-0.384135	0.107	0.147	0.000253348
Fkbp9	2.28e-38	-0.383907	0.628	0.743	4.57e-34
Tmem220	3.53e-06	-0.383551	0.051	0.075	0.0705865
1010001N08Rik	0.000106022	-0.383463	0.051	0.07	1
2610044O15Rik8	4.59e-07	-0.38325	0.057	0.084	0.0091813
Itih5	0.00312425	-0.383192	0.015	0.023	1
Elac1	2.03e-05	-0.382839	0.054	0.076	0.405185
Trmt12	0.00154413	-0.38282	0.028	0.04	1
H2afy2	3.22e-13	-0.382527	0.153	0.212	6.44e-09
Traip	0.0356868	-0.382515	0.007	0.011	1
Slc22a15	0.00972129	-0.382176	0.022	0.031	1
G2e3	0.000339318	-0.382118	0.054	0.072	1
Tifa	1.19e-05	-0.381738	0.039	0.058	0.238072
Ranbp6	0.000207118	-0.381603	0.04	0.056	1
Nif3l1	9.55e-06	-0.381575	0.044	0.064	0.190797
Zfp26	4.36e-06	-0.381221	0.059	0.084	0.0870428
Mpv17l	7.76e-12	-0.381029	0.137	0.191	1.55e-07
Tnnt1	0.0352001	-0.380813	0.018	0.024	1
Agbl3	0.0128249	-0.380805	0.033	0.042	1
Steap3	8.52e-12	-0.380752	0.126	0.178	1.7e-07
Cpped1	1.32e-12	-0.380286	0.143	0.201	2.63e-08
6030458C11Rik	9.64e-07	-0.380073	0.062	0.089	0.0192673
Pdik1l	0.00038838	-0.379903	0.038	0.053	1
Fam229b	0.00319742	-0.379769	0.03	0.041	1
Gm14325	0.30369	-0.379396	0.022	0.025	1
Tdg	4.39e-07	-0.379244	0.062	0.09	0.00877338
Zdhhc4	3.27e-10	-0.379198	0.151	0.201	6.54e-06
Psap	1.04e-102	-0.379159	0.95	0.978	2.07e-98
Adi1	3.25e-05	-0.378825	0.038	0.057	0.648986
Atp8b2	6.34e-06	-0.378688	0.068	0.093	0.126737
Nudt18	4.54e-22	-0.37865	0.254	0.352	9.08e-18
Gpatch2	0.000559114	-0.378613	0.055	0.072	1
Scara3	1.09e-17	-0.378562	0.19	0.268	2.17e-13
Nit2	1.04e-10	-0.378383	0.13	0.179	2.07e-06
Art4	1.87e-05	-0.377655	0.074	0.099	0.373089
Zfp386	6.46e-08	-0.377497	0.07	0.102	0.00129035
Pnldc1	8.08e-06	-0.376914	0.048	0.07	0.161461
Cul7	0.000839385	-0.37688	0.034	0.048	1
Fah	8.75e-08	-0.376702	0.082	0.116	0.00174809
Fzd6	2.39e-05	-0.376408	0.052	0.073	0.47742
Sgsm2	0.000615284	-0.37633	0.032	0.045	1
Haghl	1.36e-11	-0.376303	0.146	0.2	2.71e-07
Gm49334	0.0335894	-0.376125	0.009	0.013	1
AW554918	0.0111121	-0.376065	0.041	0.051	1
Focad	0.000837672	-0.375894	0.027	0.039	1
Bola1	1.15e-14	-0.375629	0.216	0.286	2.3e-10
Ice2	1.38e-05	-0.375439	0.039	0.058	0.274929
Lsm2	1.69e-15	-0.37541	0.208	0.281	3.38e-11
Tctn3	0.00475819	-0.375399	0.019	0.028	1
Cyb5b	4.39e-13	-0.375204	0.17	0.233	8.78e-09
Mylk4	3.04e-28	-0.375139	0.391	0.511	6.07e-24
Plat	2.66e-07	-0.374778	0.087	0.119	0.00531411
Uck2	9.39e-07	-0.374575	0.053	0.079	0.0187651
Tigd5	0.0164852	-0.374519	0.015	0.021	1
Tvp23bos	0.00259908	-0.373964	0.019	0.028	1
Galnt2	0.117466	-0.373894	0.007	0.01	1
Nxf1	2.5e-27	-0.373616	0.372	0.489	4.99e-23
Ankrd45	0.00176372	-0.373424	0.025	0.036	1
Smg8	0.0240715	-0.372389	0.026	0.034	1
Cep85l	2.52e-06	-0.372255	0.067	0.094	0.0503395
Tsc22d1	4.49e-60	-0.372189	0.771	0.868	8.96e-56
Gpr27	0.000627709	-0.372122	0.028	0.041	1
Adar	0.109308	-0.372041	0.028	0.033	1
Usp36	3.77e-05	-0.37198	0.055	0.076	0.754345
1700030K09Rik	0.00512848	-0.371886	0.023	0.032	1
Zfp830	1.58e-08	-0.371698	0.13	0.172	0.000316616
Olfr224	3.14e-08	-0.371536	0.075	0.109	0.000628019
Mmp17	9.43e-18	-0.371466	0.24	0.323	1.88e-13
Rassf4	2.8e-06	-0.371025	0.058	0.083	0.0558991
Ubald1	5.55e-05	-0.37093	0.049	0.068	1
Vit	0.0097443	-0.370813	0.029	0.038	1
Npas2	1.06e-11	-0.370686	0.15	0.205	2.11e-07
Gm15446	0.00840596	-0.370516	0.015	0.023	1
1110008P14Rik	2.8e-26	-0.370471	0.342	0.455	5.6e-22
Kif18a	0.0385685	-0.370409	0.011	0.015	1
Mmp23	4.78e-39	-0.370313	0.581	0.706	9.56e-35
Msl3l2	4.47e-06	-0.369904	0.062	0.087	0.0894249
Sat2	5.74e-06	-0.369811	0.074	0.101	0.114654
Lrig1	5.31e-08	-0.369733	0.074	0.107	0.00106188
Gm20878	0.0409034	-0.369677	0.012	0.017	1
P2ry2	0.000718648	-0.36939	0.028	0.041	1
Zfp872	0.022803	-0.369386	0.011	0.016	1
Cmtr1	0.00856822	-0.369207	0.021	0.029	1
D830026I12Rik	0.00608324	-0.369029	0.009	0.015	1
Mettl18	0.000615884	-0.368794	0.021	0.033	1
Hoxb3	6.24e-06	-0.368485	0.077	0.104	0.124732
Isoc2b	2.35e-09	-0.368479	0.094	0.135	4.7e-05
Pms1	0.0745096	-0.36845	0.013	0.018	1
Pafah2	0.00121505	-0.368395	0.026	0.037	1
Gba	0.00293958	-0.368353	0.025	0.036	1
Shprh	2.19e-08	-0.36817	0.081	0.116	0.000436874
Srsf6	1.97e-15	-0.368153	0.296	0.374	3.95e-11
Rragb	4.82e-05	-0.368019	0.044	0.063	0.963748
Pwp2	0.00088175	-0.368002	0.025	0.037	1
Pgap1	0.051525	-0.36776	0.03	0.037	1
Gm10848	0.170604	-0.367739	0.011	0.014	1
1500002C15Rik	0.0364246	-0.367633	0.017	0.022	1
Pcsk6	0.181632	-0.367434	0.014	0.018	1
Blm	0.0374048	-0.367223	0.008	0.012	1
Apex2	0.00646567	-0.366859	0.027	0.037	1
Zeb2os	2.35e-05	-0.366634	0.039	0.057	0.46883
Cyb561d2	7.34e-05	-0.366509	0.066	0.087	1
Zfp976	0.000346082	-0.366485	0.036	0.051	1
9030025P20Rik	1.14e-07	-0.366481	0.079	0.111	0.00227333
Tmem230	9.01e-14	-0.366444	0.163	0.226	1.8e-09
Gypc	6.21e-06	-0.366429	0.062	0.086	0.124115
Zfp952	0.000874757	-0.366378	0.036	0.05	1
Selenop	6.33e-43	-0.366368	0.806	0.877	1.27e-38
Synpo2	3.25e-50	-0.366333	0.779	0.864	6.5e-46
Anxa2	1.87e-41	-0.366194	0.658	0.757	3.73e-37
Zfp947	0.0765395	-0.365764	0.009	0.013	1
Tfpi	4.91e-07	-0.365632	0.058	0.085	0.00981022
Wdr77	1.65e-07	-0.365599	0.103	0.139	0.00330339
Serp2	0.00248528	-0.365539	0.035	0.047	1
Pitpnm2	2.56e-05	-0.365533	0.067	0.09	0.51171
Eif2ak3	0.00108968	-0.365287	0.027	0.038	1
Catsper2	0.222572	-0.364938	0.007	0.01	1
Tom1l1	0.000251816	-0.364849	0.044	0.06	1
Ptrh2	3.03e-10	-0.36471	0.077	0.116	6.06e-06
Ssr2	1.25e-22	-0.364559	0.358	0.457	2.5e-18
Pmp22	1.28e-49	-0.364539	0.648	0.77	2.57e-45
Sox13	0.0618758	-0.364488	0.024	0.03	1
Pigyl	2.74e-23	-0.364084	0.369	0.474	5.47e-19
Cep78	0.182688	-0.364074	0.021	0.025	1
Nr3c2	0.00153316	-0.36385	0.04	0.054	1
Rpusd1	0.0248242	-0.363816	0.038	0.047	1
Itih4	3.09e-16	-0.363797	0.442	0.523	6.17e-12
Oaf	3.82e-07	-0.362474	0.061	0.089	0.00762855
Rhbdf2	0.00134442	-0.362377	0.046	0.061	1
Hspb8	1.81e-21	-0.362175	0.353	0.454	3.63e-17
Nme3	0.000613517	-0.361878	0.052	0.069	1
Pcyt2	1.01e-07	-0.361753	0.105	0.141	0.00201064
Pop1	0.0678302	-0.361658	0.009	0.013	1
Scarb2	4.07e-14	-0.361369	0.181	0.247	8.14e-10
Anapc1	9.66e-08	-0.361083	0.114	0.152	0.0019311
Mocs3	0.000547599	-0.361003	0.036	0.05	1
Alkbh1	2.24e-06	-0.360938	0.073	0.101	0.0447515
Mrpl16	2.32e-08	-0.360759	0.127	0.169	0.000463626
Sars2	0.016114	-0.360453	0.023	0.031	1
Senp8	0.00397309	-0.360144	0.018	0.027	1
Pign	0.0143573	-0.360139	0.021	0.028	1
Iqcc	2.39e-07	-0.359466	0.075	0.107	0.00477432
Nol10	0.00883927	-0.359241	0.029	0.039	1
Timm10	7.77e-08	-0.359119	0.11	0.148	0.00155217
Cxcl12	7.57e-29	-0.358906	0.394	0.507	1.51e-24
Zfp960	0.00270238	-0.358778	0.021	0.03	1
Brd3os	0.00136665	-0.358725	0.03	0.042	1
Clp1	0.000718763	-0.358724	0.045	0.061	1
Wdr53	2.34e-05	-0.358131	0.07	0.094	0.468242
Coa4	0.00123595	-0.358043	0.045	0.06	1
Itfg1	6.06e-28	-0.357881	0.404	0.523	1.21e-23
Tmem110	6.44e-25	-0.357741	0.509	0.617	1.29e-20
Zfp51	0.0268609	-0.357418	0.028	0.036	1
Mcc	0.00889154	-0.35733	0.013	0.02	1
Mfap2	0.000257153	-0.357085	0.051	0.068	1
Pigc	1.33e-08	-0.356759	0.087	0.124	0.000266037
Nlgn3	0.00148703	-0.356726	0.033	0.046	1
Zfp113	6.6e-06	-0.356708	0.036	0.055	0.131869
Usp53	4.93e-09	-0.356557	0.18	0.229	9.86e-05
Nop9	3.45e-08	-0.35654	0.065	0.097	0.000689658
Trp53inp1	1.89e-11	-0.356492	0.154	0.208	3.79e-07
Ebpl	2.51e-16	-0.356142	0.209	0.287	5.02e-12
Rpp38	0.000375157	-0.355955	0.035	0.049	1
Trim46	0.00214969	-0.355648	0.028	0.04	1
Gusb	7.46e-12	-0.355607	0.229	0.292	1.49e-07
Ccdc115	1.12e-07	-0.355602	0.105	0.141	0.00222839
Rad18	0.00471829	-0.355549	0.019	0.028	1
Zfp623	0.0013258	-0.355441	0.02	0.031	1
Ppil3	1.25e-10	-0.355414	0.167	0.222	2.5e-06
Zfp39	0.00994563	-0.35496	0.023	0.032	1
Ndufv3	6.93e-50	-0.354554	0.751	0.847	1.38e-45
Podxl2	3.16e-13	-0.354471	0.206	0.273	6.31e-09
Rnf145	1.07e-12	-0.354411	0.127	0.183	2.13e-08
2410080I02Rik	0.0511873	-0.353947	0.007	0.011	1
Ppdpf	4.07e-20	-0.35384	0.341	0.44	8.13e-16
Gm26881	9.77e-05	-0.353663	0.049	0.069	1
Hsd17b7	0.000564931	-0.353092	0.032	0.045	1
Unkl	0.0829453	-0.353042	0.03	0.036	1
Gnptg	4.12e-08	-0.352823	0.093	0.129	0.000823976
Fhl1	6.97e-104	-0.35278	0.987	0.994	1.39e-99
Rhou	1.99e-11	-0.352589	0.116	0.166	3.97e-07
Mrpl36	1.18e-19	-0.352401	0.317	0.412	2.37e-15
Tmem50b	3.57e-11	-0.35221	0.155	0.21	7.14e-07
Fstl1	1.24e-94	-0.352198	0.958	0.982	2.47e-90
Kptn	0.0003098	-0.352119	0.06	0.078	1
Thg1l	3.91e-05	-0.351984	0.063	0.085	0.781255
Pdgfb	0.00630419	-0.351851	0.016	0.024	1
Tmem143	6.45e-06	-0.351785	0.054	0.077	0.128849
Slc36a1	0.0168232	-0.351744	0.01	0.015	1
Pde1a	1.06e-15	-0.351656	0.138	0.202	2.11e-11
Cox11	2.46e-06	-0.35147	0.078	0.107	0.0490718
Zfp729b	0.000606616	-0.35145	0.041	0.056	1
Trim41	0.00023877	-0.351427	0.062	0.082	1
Sorl1	1.29e-22	-0.351217	0.336	0.443	2.58e-18
Sh3kbp1	0.000919936	-0.35109	0.043	0.058	1
Tmem9	1.09e-15	-0.351055	0.158	0.227	2.17e-11
Otub2	0.00169399	-0.350821	0.018	0.027	1
Ptpn4	0.000740615	-0.35066	0.031	0.044	1
Tirap	0.000535495	-0.350448	0.049	0.065	1
Astn2	0.00818463	-0.350403	0.036	0.047	1
Gm21083	0.0750344	-0.350272	0.007	0.01	1
Hacd3	3.18e-06	-0.349711	0.071	0.099	0.0635436
Tmtc2	2.73e-10	-0.349671	0.146	0.195	5.46e-06
Npat	0.00126382	-0.349559	0.05	0.065	1
Mxra7	1.4e-24	-0.349537	0.376	0.488	2.79e-20
Gdpd5	3.24e-05	-0.349535	0.072	0.096	0.647944
Prickle1	0.000831692	-0.349395	0.041	0.056	1
Alx1	0.101761	-0.349317	0.024	0.029	1
G730003C15Rik	0.129947	-0.349189	0.007	0.01	1
Arsj	0.0684588	-0.349149	0.009	0.013	1
Gm26982	0.348113	-0.348771	0.008	0.01	1
Eif3j2	3.43e-14	-0.348752	0.323	0.399	6.85e-10
Sbk1	0.142581	-0.348487	0.015	0.019	1
Med31	1.59e-17	-0.34838	0.257	0.344	3.18e-13
Adamts9	0.000844037	-0.348227	0.048	0.063	1
Tcea3	1.47e-14	-0.347957	0.261	0.338	2.94e-10
Nme1	4.78e-20	-0.347916	0.343	0.443	9.56e-16
Pde3b	0.0047439	-0.347796	0.026	0.036	1
1700113A16Rik	0.0644689	-0.347784	0.01	0.014	1
Tpcn2	0.000119737	-0.347542	0.041	0.058	1
Pabpc4l	0.045861	-0.347489	0.009	0.014	1
Gm6710	8.89e-05	-0.347376	0.064	0.085	1
Ddx55	3.44e-05	-0.347127	0.066	0.089	0.686667
Adamts2	3.34e-22	-0.347093	0.377	0.481	6.67e-18
Glb1l	0.00072762	-0.347074	0.032	0.045	1
Zfp7	0.00282433	-0.346311	0.014	0.023	1
Lgmn	3.04e-33	-0.346107	0.566	0.687	6.08e-29
Nle1	3.38e-05	-0.346104	0.062	0.084	0.675753
Mterf2	0.000368095	-0.345893	0.035	0.049	1
Klhdc10	0.00117716	-0.345633	0.05	0.066	1
Cat	2.51e-13	-0.345473	0.227	0.296	5.01e-09
Tpmt	2.67e-06	-0.345426	0.059	0.084	0.0534037
Ackr3	3.33e-11	-0.345341	0.099	0.145	6.66e-07
Cxxc1	6.88e-15	-0.34528	0.19	0.26	1.37e-10
Exosc9	5.19e-08	-0.345082	0.097	0.134	0.00103815
Zfp286	2.82e-05	-0.345014	0.027	0.044	0.564137
Lrrc51	0.00243017	-0.344929	0.022	0.032	1
Gstt1	3.06e-22	-0.344774	0.398	0.505	6.12e-18
Coprs	0.00478319	-0.344695	0.034	0.045	1
Tmem185b	2.54e-10	-0.344575	0.081	0.121	5.08e-06
Hmgb3	0.000257257	-0.344453	0.037	0.052	1
Dock4	0.000298215	-0.344437	0.043	0.06	1
Pam	3.22e-67	-0.344423	0.984	0.99	6.44e-63
Slc39a14	2.72e-06	-0.34424	0.117	0.149	0.0543004
Abca2	8.98e-08	-0.344156	0.123	0.162	0.00179458
Rabl3	0.00229897	-0.344075	0.04	0.053	1
Dhrs3	2.88e-38	-0.343972	0.624	0.742	5.75e-34
Npc1	2.47e-08	-0.343915	0.113	0.153	0.000493882
Dcn	2.26e-23	-0.343911	0.402	0.51	4.51e-19
Cptp	0.00039041	-0.343891	0.039	0.054	1
Mrps34	1.96e-14	-0.343783	0.229	0.301	3.92e-10
Bag2	2.01e-13	-0.343776	0.208	0.275	4.01e-09
Fam216a	2.87e-08	-0.343763	0.09	0.126	0.000573312
2310001H17Rik	0.0661236	-0.34372	0.015	0.02	1
Angptl7	0.733625	-0.343307	0.022	0.023	1
Gm3448	0.0576724	-0.343118	0.016	0.021	1
Tank	2.82e-13	-0.343116	0.173	0.238	5.63e-09
Fam81a	7.44e-18	-0.342831	0.288	0.376	1.49e-13
Kif26b	0.0716012	-0.342815	0.023	0.029	1
Zfp414	8.09e-12	-0.342804	0.158	0.215	1.62e-07
3110040N11Rik	3.31e-05	-0.342753	0.054	0.076	0.661526
Epb41l4b	0.0403552	-0.342736	0.012	0.017	1
Vars2	0.0201655	-0.342731	0.016	0.023	1
Hmgn1	1.62e-63	-0.342443	0.837	0.91	3.23e-59
Ccdc73	0.00215675	-0.342226	0.043	0.056	1
Disp1	0.00860826	-0.342196	0.017	0.025	1
Gm10643	0.0065774	-0.342048	0.013	0.02	1
Gtf2h4	0.000609019	-0.341902	0.07	0.089	1
Bace2	0.011446	-0.341395	0.019	0.026	1
Tnk2	2.21e-10	-0.341247	0.128	0.176	4.41e-06
AC165953.2	0.00313457	-0.341059	0.031	0.042	1
Gm6634	1.22e-09	-0.340824	0.082	0.121	2.44e-05
Tor2a	1.2e-06	-0.34072	0.094	0.126	0.0239958
Pold2	9.35e-11	-0.340632	0.135	0.186	1.87e-06
Ptprf	0.000217919	-0.34034	0.045	0.062	1
Ecm1	7.4e-47	-0.340201	0.844	0.899	1.48e-42
1700048O20Rik	0.00140259	-0.33988	0.014	0.023	1
Rab34	4.64e-24	-0.339792	0.375	0.484	9.27e-20
Plpp7	0.000210353	-0.339577	0.041	0.057	1
Tcap	2.22e-07	-0.339575	0.303	0.352	0.00444553
Mrgprf	7.95e-27	-0.339492	0.466	0.581	1.59e-22
Postn	1.44e-31	-0.339175	0.748	0.817	2.88e-27
Ybey	0.0215355	-0.338905	0.04	0.049	1
Cbfa2t3	0.000230729	-0.338736	0.049	0.067	1
Ten1	7.16e-13	-0.338728	0.151	0.211	1.43e-08
Smim3	1.42e-19	-0.338687	0.226	0.315	2.84e-15
Ostc	2.6e-35	-0.338578	0.614	0.726	5.2e-31
Slc29a3	1.15e-05	-0.338155	0.046	0.067	0.230341
Nubp1	6.8e-09	-0.337955	0.15	0.195	0.000135934
Amdhd2	0.00040618	-0.337884	0.049	0.066	1
Tshz3	0.000745438	-0.337417	0.045	0.061	1
Gm26523	0.000790174	-0.337054	0.034	0.048	1
Nat6	4.32e-06	-0.336962	0.108	0.14	0.0862494
Extl3	2.07e-06	-0.336699	0.066	0.092	0.0412899
Aph1c	0.0772882	-0.336655	0.009	0.013	1
Rpp25l	2.86e-08	-0.336453	0.116	0.156	0.00057213
Vps13a	1.75e-07	-0.336396	0.127	0.165	0.00350554
Nkrf	3.54e-06	-0.33639	0.024	0.041	0.0708418
CAAA01147332.1	4.52e-05	-0.336375	0.026	0.041	0.904122
Styx	0.0102946	-0.336342	0.027	0.036	1
Fdft1	8.36e-10	-0.336067	0.127	0.174	1.67e-05
Smad3	0.00268029	-0.33593	0.039	0.052	1
Zfp458	0.00123634	-0.335636	0.016	0.026	1
Angptl6	0.00042471	-0.33553	0.039	0.054	1
Iigp1	1.89e-05	-0.335526	0.034	0.052	0.377864
Pak6	0.000293263	-0.335437	0.036	0.051	1
Kcnt2	0.00256734	-0.335282	0.062	0.078	1
Mtss1	1.01e-10	-0.335127	0.198	0.257	2.02e-06
Abcc1	4.73e-14	-0.334844	0.188	0.255	9.45e-10
Nucb1	1.44e-32	-0.334843	0.597	0.703	2.89e-28
Adamtsl2	0.00387405	-0.334691	0.01	0.017	1
Gm26724	0.00101673	-0.334374	0.029	0.041	1
Gpalpp1	0.000594008	-0.334344	0.048	0.064	1
Col5a2	7.75e-31	-0.33432	0.553	0.667	1.55e-26
Tmlhe	0.000157666	-0.333966	0.037	0.053	1
Mrgbp	6.31e-08	-0.333922	0.081	0.115	0.00126174
Pigh	8.41e-06	-0.333914	0.073	0.099	0.168046
Pcdhb16	0.0567683	-0.333816	0.015	0.02	1
Noc3l	1.35e-05	-0.333708	0.055	0.078	0.269814
Naa60	3.03e-05	-0.333649	0.063	0.086	0.606242
Hspa1a	3.07e-38	-0.333398	0.48	0.623	6.13e-34
Gpt2	0.00251466	-0.333224	0.02	0.03	1
Ccdc136	2.99e-07	-0.332871	0.055	0.082	0.00596858
Fam162a	1.76e-25	-0.332659	0.576	0.676	3.51e-21
Scn2a	1.5e-05	-0.332269	0.059	0.082	0.300628
Alg12	0.00154409	-0.332038	0.039	0.052	1
Ntn1	1.77e-10	-0.33188	0.234	0.292	3.53e-06
Mrpl40	9.73e-09	-0.331507	0.146	0.191	0.000194498
Fn1	2.41e-27	-0.331478	0.525	0.648	4.81e-23
Acyp1	1.12e-10	-0.331441	0.189	0.247	2.24e-06
Tmem98	3.82e-10	-0.331429	0.149	0.2	7.64e-06
Nucb2	1.07e-12	-0.331262	0.25	0.318	2.15e-08
Clec2d	0.000522281	-0.330525	0.064	0.083	1
Thap7	4.13e-10	-0.330485	0.148	0.197	8.25e-06
Dpp7	1.38e-09	-0.329928	0.097	0.139	2.76e-05
Trub2	2.01e-09	-0.329888	0.1	0.141	4.01e-05
Zfp354c	1.64e-05	-0.329887	0.075	0.101	0.328684
Riox2	4.24e-05	-0.329867	0.071	0.094	0.846647
Tmem219	1.19e-10	-0.329641	0.193	0.251	2.37e-06
Nln	0.000244157	-0.329566	0.036	0.051	1
Nme2	2.53e-12	-0.329378	0.29	0.357	5.06e-08
Cuta	5.62e-28	-0.32886	0.513	0.627	1.12e-23
Fuk	0.00310017	-0.328723	0.04	0.053	1
Adamts12	0.118041	-0.328606	0.009	0.013	1
Hebp1	1.49e-16	-0.328425	0.276	0.361	2.98e-12
Mrpl27	6.14e-16	-0.328392	0.307	0.39	1.23e-11
Acaca	1.09e-05	-0.328302	0.067	0.092	0.218332
Rogdi	2.04e-09	-0.328251	0.117	0.161	4.09e-05
Zcchc14	3.2e-15	-0.328198	0.17	0.239	6.4e-11
Ahnak2	9.73e-22	-0.328009	0.369	0.47	1.94e-17
Mfsd5	0.0182258	-0.327748	0.051	0.062	1
Adssl1	2.67e-08	-0.327697	0.133	0.175	0.000532799
Galnt4	0.000656311	-0.327585	0.03	0.043	1
Zfp709	0.00657947	-0.327566	0.009	0.014	1
Trdmt1	6.26e-05	-0.327462	0.08	0.104	1
Sra1	1.82e-15	-0.327224	0.308	0.39	3.64e-11
Szt2	0.0121011	-0.326966	0.018	0.026	1
Ptrhd1	1.57e-09	-0.326885	0.105	0.147	3.13e-05
Rbmxl1	2.03e-11	-0.326843	0.192	0.251	4.06e-07
Ndor1	0.0190342	-0.326829	0.01	0.015	1
Plce1	5.33e-08	-0.326475	0.084	0.118	0.00106611
Sh3bgr	1.02e-52	-0.326397	0.829	0.896	2.03e-48
Cdk20	0.000208763	-0.326347	0.029	0.044	1
Arsg	0.0181074	-0.326285	0.016	0.023	1
Bid	0.0208959	-0.326279	0.007	0.011	1
Zcchc10	2.33e-07	-0.326138	0.146	0.187	0.00464713
Smim27	3e-19	-0.32592	0.396	0.491	5.99e-15
1700052K11Rik	1.01e-06	-0.325653	0.074	0.102	0.0201779
Mapkapk5	0.0238446	-0.325466	0.026	0.033	1
Umps	1.01e-05	-0.325428	0.064	0.088	0.202818
Pcdhga12	0.030203	-0.325415	0.023	0.03	1
Ogfod3	1.26e-08	-0.325218	0.14	0.184	0.00025149
Aars2	0.0318615	-0.32521	0.02	0.027	1
Med7	5.17e-11	-0.325162	0.152	0.206	1.03e-06
Plxna4	4.62e-07	-0.325087	0.103	0.137	0.00924175
Skida1	0.283384	-0.325052	0.009	0.011	1
Ptprs	4.61e-22	-0.32505	0.473	0.58	9.21e-18
Gen1	0.054884	-0.325016	0.009	0.014	1
Zfp945	0.00228174	-0.324654	0.061	0.076	1
Retreg1	0.00154648	-0.324484	0.027	0.039	1
Trmt61a	5.25e-07	-0.324415	0.063	0.091	0.0104846
Tekt2	0.0146728	-0.324283	0.013	0.019	1
Pdgfrb	5.96e-17	-0.324253	0.296	0.384	1.19e-12
Irf7	0.720293	-0.323542	0.022	0.023	1
Colgalt1	3.3e-18	-0.322968	0.314	0.409	6.6e-14
Itln1	0.00156424	-0.322927	0.024	0.035	1
Fbxw17	4.17e-07	-0.322829	0.097	0.13	0.00833363
Pald1	4.44e-08	-0.322822	0.065	0.096	0.000887432
Pparg	0.0532969	-0.322654	0.014	0.02	1
Golm1	0.324302	-0.322582	0.009	0.011	1
Cav3	6.61e-13	-0.322407	0.189	0.253	1.32e-08
Anapc7	6.74e-18	-0.322392	0.288	0.38	1.35e-13
Dgkq	0.000486507	-0.322136	0.035	0.049	1
Wdr6	6.34e-10	-0.321942	0.117	0.163	1.27e-05
Cand2	0.000737672	-0.321911	0.022	0.033	1
Xpo5	0.033323	-0.321814	0.013	0.019	1
Pigu	0.000317245	-0.32177	0.053	0.071	1
Dkk3	4.21e-26	-0.321686	0.469	0.574	8.4e-22
Bin1	3.04e-12	-0.321458	0.194	0.258	6.07e-08
Rnf135	0.0757948	-0.321415	0.017	0.022	1
Nphp3	0.000549601	-0.321332	0.041	0.057	1
Zfp825	0.00035896	-0.321235	0.05	0.068	1
Qdpr	1.73e-13	-0.321189	0.183	0.248	3.46e-09
Col4a5	1.03e-19	-0.320967	0.473	0.572	2.05e-15
Ubl5	5.13e-39	-0.320872	0.691	0.8	1.02e-34
Zscan22	0.0313558	-0.320796	0.02	0.027	1
Dgke	0.000998601	-0.320737	0.04	0.055	1
Alyref2	0.000170872	-0.320669	0.038	0.054	1
Lipt2	0.000396707	-0.320469	0.032	0.046	1
Nod1	4.19e-05	-0.320464	0.05	0.071	0.837643
Rab39b	0.000367891	-0.320335	0.025	0.038	1
Sardh	1.97e-05	-0.320315	0.058	0.081	0.392793
Brdt	0.00382389	-0.320143	0.029	0.04	1
Csdc2	1.05e-06	-0.319931	0.097	0.13	0.021027
Cyp4v3	8.92e-07	-0.319611	0.069	0.097	0.0178201
Prrx1	1.11e-22	-0.319584	0.272	0.374	2.23e-18
Impad1	4.68e-19	-0.319524	0.295	0.389	9.36e-15
Uqcc2	1.03e-22	-0.319234	0.465	0.574	2.05e-18
Cox7a1	0.0177145	-0.319132	0.012	0.017	1
Spats2	5.25e-07	-0.319021	0.051	0.076	0.0104949
Mrnip	0.0469173	-0.318902	0.014	0.02	1
A4galt	7.17e-11	-0.318877	0.239	0.3	1.43e-06
Slc8a2	0.00293383	-0.318575	0.047	0.06	1
Zfp687	0.00631431	-0.318495	0.043	0.055	1
Polr2b	1.34e-07	-0.318167	0.106	0.142	0.00266802
Zfp870	0.0102319	-0.318151	0.022	0.031	1
1110059G10Rik	9.95e-12	-0.318073	0.156	0.213	1.99e-07
Gm48053	2.63e-05	-0.318028	0.058	0.081	0.526042
Ddx17	2.67e-14	-0.317914	0.316	0.395	5.34e-10
Pdp2	9.54e-11	-0.317597	0.117	0.165	1.91e-06
Tmed8	0.0251109	-0.317473	0.049	0.059	1
Amot	0.0118985	-0.317454	0.006	0.011	1
Mrpl50	4.72e-12	-0.317282	0.181	0.242	9.43e-08
Gm16365	0.016278	-0.317158	0.012	0.018	1
Ogdh	5.61e-15	-0.317137	0.3	0.383	1.12e-10
Myl6b	0.0123041	-0.317091	0.034	0.044	1
Dcun1d2	2.19e-05	-0.316709	0.078	0.103	0.438587
Zfp101	0.00363007	-0.316692	0.043	0.055	1
Stox2	2.08e-08	-0.316535	0.117	0.158	0.000416304
Parp14	0.00296673	-0.316522	0.022	0.032	1
Zfp729a	0.00142901	-0.316518	0.045	0.06	1
Prcp	7.29e-09	-0.316486	0.09	0.128	0.000145788
Pecr	9.38e-06	-0.316429	0.078	0.105	0.187509
Usp38	0.000358198	-0.316321	0.052	0.07	1
Zbed4	0.0938633	-0.316241	0.019	0.024	1
Eif2ak2	1.66e-06	-0.316104	0.081	0.111	0.0332136
Zfp692	0.024785	-0.316074	0.036	0.045	1
Mterf1a	0.00190558	-0.315855	0.027	0.039	1
Gm12258	0.0119706	-0.315803	0.011	0.017	1
Stum	2.34e-14	-0.315434	0.223	0.297	4.69e-10
Mapk12	0.0165425	-0.315407	0.022	0.029	1
Slc25a1	2.06e-07	-0.315339	0.13	0.169	0.0041142
Lyrm9	2.41e-08	-0.315109	0.061	0.092	0.000481463
St3gal2	1.73e-14	-0.314928	0.261	0.34	3.45e-10
Tmx2	1.09e-14	-0.314818	0.217	0.292	2.18e-10
Tln2	0.00743321	-0.314795	0.04	0.051	1
Tex2	8.23e-08	-0.31479	0.111	0.149	0.00164533
Atcayos	2.75e-10	-0.31476	0.182	0.236	5.49e-06
Ccdc92	0.080699	-0.314432	0.009	0.013	1
Ccdc152	0.0265493	-0.314275	0.014	0.02	1
Taf10	1.42e-14	-0.314214	0.258	0.333	2.84e-10
Zfp566	0.00664684	-0.314095	0.015	0.023	1
Pfn1	1.05e-94	-0.313889	0.973	0.991	2.09e-90
Lrrc1	0.149742	-0.313869	0.015	0.019	1
Kbtbd3	2.24e-09	-0.313848	0.115	0.159	4.48e-05
Dclre1b	0.00549651	-0.31376	0.022	0.031	1
Amacr	0.000138718	-0.31362	0.048	0.067	1
Slirp	1.32e-19	-0.313352	0.4	0.499	2.63e-15
Nmrk1	2.89e-06	-0.313254	0.06	0.086	0.0577052
Pdxk	1.74e-05	-0.313245	0.07	0.095	0.347469
Tmem106a	0.0120607	-0.313207	0.018	0.026	1
Zbtb33	0.00825843	-0.313187	0.035	0.046	1
Psmc3ip	0.00103892	-0.313089	0.052	0.068	1
Gm2415	0.275033	-0.313011	0.02	0.023	1
Prkd3	1.19e-08	-0.312964	0.161	0.208	0.00023786
Higd1b	0.712441	-0.312903	0.011	0.011	1
Acat2	2.23e-06	-0.312876	0.084	0.113	0.0445563
Tm9sf1	0.00848511	-0.312836	0.02	0.028	1
Gm20696	0.000370549	-0.3128	0.031	0.045	1
Def6	0.01283	-0.312781	0.013	0.019	1
Kat5	0.000168969	-0.312611	0.08	0.102	1
Rnf141	4.59e-09	-0.312553	0.099	0.139	9.18e-05
Gns	1.33e-11	-0.31253	0.214	0.277	2.65e-07
B4galt4	1.35e-05	-0.312524	0.084	0.111	0.270221
Acvrl1	2.03e-07	-0.312468	0.09	0.123	0.00405428
Sik2	6.69e-06	-0.312402	0.09	0.119	0.133736
Tmod1	2.77e-10	-0.312381	0.198	0.256	5.54e-06
Prss53	0.0806788	-0.311888	0.012	0.016	1
Rpf2	5.27e-06	-0.311569	0.097	0.127	0.105362
Ppef1	1.68e-05	-0.311429	0.097	0.125	0.336099
Scrn1	9.65e-07	-0.311385	0.113	0.148	0.0192848
Terf2ip	5.08e-10	-0.311206	0.15	0.2	1.02e-05
Suox	0.0016404	-0.31097	0.04	0.054	1
Slc35a4	3.11e-07	-0.310769	0.122	0.159	0.00622021
Brd7	5.19e-13	-0.310691	0.319	0.393	1.04e-08
Ddo	0.043048	-0.310633	0.015	0.02	1
Mettl14	0.00962751	-0.310495	0.048	0.06	1
Mis12	5.85e-05	-0.310381	0.065	0.087	1
Sub1	9.47e-30	-0.310379	0.543	0.664	1.89e-25
Sv2a	4.89e-05	-0.310371	0.052	0.072	0.977448
Hspa2	2.27e-36	-0.310265	0.506	0.639	4.53e-32
Tars2	0.00493944	-0.31015	0.059	0.074	1
Adam17	2.55e-08	-0.310108	0.141	0.185	0.000510454
Ltbr	1.77e-12	-0.310049	0.175	0.237	3.53e-08
Cnot9	0.000115893	-0.309921	0.062	0.082	1
Igsf9b	1.37e-14	-0.3098	0.223	0.297	2.74e-10
Tmem70	8.56e-16	-0.309778	0.261	0.345	1.71e-11
Zfp930	4.26e-05	-0.309669	0.035	0.052	0.850406
Blcap	2.5e-08	-0.309567	0.106	0.146	0.000500591
Scnm1	3.15e-07	-0.30926	0.083	0.114	0.00629674
Polr2i	7.57e-17	-0.30914	0.382	0.472	1.51e-12
Slc39a1	1.73e-31	-0.30901	0.728	0.806	3.45e-27
Rnf19a	1.69e-12	-0.309007	0.219	0.286	3.37e-08
Ndufaf7	3.77e-08	-0.309	0.12	0.161	0.00075316
Wdr7	0.00123518	-0.308274	0.041	0.055	1
Tmem191c	0.004317	-0.308245	0.039	0.051	1
Cd59a	6.39e-30	-0.308042	0.646	0.739	1.28e-25
Bcl6	1.46e-05	-0.307985	0.081	0.107	0.292598
Morn2	1.21e-07	-0.307851	0.088	0.123	0.00241527
Tapbp	8.42e-16	-0.307699	0.345	0.434	1.68e-11
Hmgcr	1.39e-09	-0.307464	0.126	0.172	2.77e-05
Mfsd10	4.81e-13	-0.307334	0.266	0.339	9.61e-09
Cox18	1.82e-08	-0.307266	0.155	0.201	0.000362918
Sgcd	1.79e-19	-0.307125	0.439	0.54	3.58e-15
Cst6	0.488206	-0.307037	0.008	0.01	1
P4htm	2.31e-12	-0.306542	0.146	0.204	4.63e-08
Trub1	0.000770991	-0.306427	0.039	0.053	1
Tor1aip2	8.77e-10	-0.306344	0.158	0.209	1.75e-05
Naprt	3e-05	-0.306314	0.058	0.08	0.599532
Siae	0.000134265	-0.306274	0.066	0.087	1
Tldc1	0.0838767	-0.306135	0.025	0.031	1
Creb3l1	6.53e-12	-0.306092	0.187	0.247	1.31e-07
Zfp971	0.00992435	-0.305791	0.025	0.034	1
Sipa1l2	0.00011929	-0.305463	0.053	0.072	1
Morf4l2	1.1e-20	-0.305418	0.526	0.618	2.19e-16
Tmem104	0.0468465	-0.305273	0.03	0.037	1
Emc6	7.69e-16	-0.304815	0.3	0.386	1.54e-11
Bcdin3d	0.00262461	-0.304788	0.034	0.047	1
Ndufaf5	1.15e-05	-0.304753	0.063	0.087	0.229684
Erap1	2.55e-09	-0.304678	0.12	0.165	5.1e-05
Lrba	0.0324147	-0.304554	0.035	0.043	1
Olfr1034	0.00140569	-0.304553	0.018	0.027	1
Mettl1	2.88e-13	-0.304061	0.206	0.275	5.76e-09
D930016D06Rik	0.00586645	-0.303746	0.036	0.048	1
Pcdhb17	0.00038649	-0.303696	0.049	0.066	1
Hps1	0.000293827	-0.303569	0.035	0.05	1
Mapkbp1	0.20205	-0.303406	0.03	0.034	1
Zscan29	0.0203071	-0.303366	0.029	0.038	1
Kti12	2.32e-06	-0.303055	0.07	0.097	0.0464563
Zfp719	8.09e-06	-0.302953	0.055	0.079	0.161768
CT025619.1	7.07e-13	-0.30289	0.269	0.34	1.41e-08
Ppp1r9b	4.38e-06	-0.302817	0.107	0.139	0.0874375
Tbc1d16	1.04e-05	-0.302784	0.049	0.071	0.207793
Chpf2	4.12e-07	-0.302726	0.078	0.108	0.00822599
Cdh13	1.53e-28	-0.302658	0.604	0.713	3.05e-24
Fndc3b	1.86e-14	-0.302358	0.337	0.42	3.72e-10
D3Ertd751e	0.000315174	-0.302327	0.051	0.068	1
Nepro	0.0090554	-0.302312	0.018	0.026	1
AC129328.1	0.00352445	-0.302277	0.026	0.037	1
Ern1	0.000215913	-0.301926	0.032	0.047	1
Tbc1d14	0.0237336	-0.301814	0.036	0.045	1
Lrsam1	0.0129487	-0.301793	0.024	0.033	1
Zfp157	0.0001283	-0.301758	0.061	0.081	1
Ehhadh	0.0208467	-0.301567	0.016	0.023	1
Wfs1	4.82e-09	-0.301522	0.162	0.211	9.63e-05
Nfix	1.11e-55	-0.301281	0.895	0.943	2.22e-51
Pprc1	0.0436546	-0.300986	0.029	0.036	1
Celf4	0.0452358	-0.300959	0.011	0.015	1
Brat1	0.00946857	-0.300938	0.025	0.034	1
Gstt3	1.29e-09	-0.300689	0.113	0.158	2.57e-05
Taf9b	1.24e-06	-0.300561	0.092	0.123	0.0248054
Fam213a	6.59e-06	-0.30052	0.089	0.118	0.13168
Fgfbp3	0.0283005	-0.300202	0.013	0.018	1
Efs	7.19e-09	-0.3	0.097	0.137	0.000143617
Gm10076	2.51e-10	-0.299893	0.296	0.358	5.02e-06
Thyn1	6.4e-08	-0.2998	0.133	0.175	0.00127894
Rpa3	8.72e-07	-0.299746	0.145	0.183	0.0174229
Tbk1	6.38e-05	-0.299745	0.077	0.101	1
Fads1	3.95e-06	-0.299546	0.121	0.155	0.0790291
Fzd2	6.43e-22	-0.299521	0.415	0.523	1.29e-17
Acad12	0.0109503	-0.299449	0.018	0.026	1
Ube2e3	2.74e-22	-0.29942	0.479	0.588	5.48e-18
Rida	8.71e-09	-0.299264	0.111	0.152	0.000174095
Pank3	2.99e-07	-0.299187	0.108	0.145	0.00597886
Ccl25	0.000723901	-0.299132	0.039	0.054	1
B4galt1	3.66e-21	-0.298966	0.336	0.439	7.31e-17
Sec22a	2.72e-10	-0.298948	0.136	0.185	5.45e-06
Psmb10	5.21e-05	-0.298815	0.091	0.117	1
Cstf3	1.51e-09	-0.298762	0.153	0.203	3.02e-05
Eri2	0.00131349	-0.298607	0.017	0.027	1
Tctex1d2	8.21e-08	-0.2986	0.129	0.17	0.0016407
Zbtb12	0.000823987	-0.298487	0.054	0.071	1
Tmem17	0.00285046	-0.298161	0.038	0.05	1
Rad54l2	0.000274586	-0.298148	0.05	0.068	1
Zbtb5	0.00734967	-0.298125	0.025	0.034	1
Snx2	1.24e-17	-0.298047	0.285	0.376	2.49e-13
Ttc30b	2.3e-05	-0.297865	0.058	0.08	0.460267
Mtus1	1.09e-10	-0.297762	0.23	0.291	2.18e-06
Cmtm7	6.09e-12	-0.297742	0.181	0.243	1.22e-07
Palm	7.71e-14	-0.297494	0.189	0.258	1.54e-09
Mgmt	1.49e-05	-0.297478	0.085	0.112	0.297004
Nr1d2	3.83e-05	-0.297376	0.061	0.083	0.76539
Trim65	0.00214127	-0.297346	0.051	0.066	1
Itgb3bp	6.88e-10	-0.297266	0.147	0.198	1.38e-05
Gdpgp1	0.0108917	-0.297209	0.013	0.019	1
A630023A22Rik	0.142995	-0.297152	0.009	0.012	1
Kbtbd7	0.00073227	-0.297097	0.042	0.058	1
Timp3	8.13e-34	-0.297056	0.867	0.918	1.62e-29
Ddx28	0.0166438	-0.296619	0.025	0.033	1
Zfp141	0.0142889	-0.296352	0.017	0.024	1
4933404O12Rik	0.00143776	-0.29628	0.04	0.054	1
Pradc1	0.000114842	-0.296244	0.072	0.094	1
2310009B15Rik	5.91e-06	-0.295725	0.126	0.159	0.118067
Adam10	1.65e-08	-0.295643	0.167	0.215	0.000329335
Hax1	6.54e-09	-0.29562	0.196	0.246	0.00013072
Smox	0.0012894	-0.295539	0.038	0.051	1
Mthfsd	2.6e-07	-0.295349	0.096	0.13	0.00519729
Adamts15	0.00306338	-0.295206	0.054	0.069	1
Pym1	2.65e-05	-0.295041	0.086	0.112	0.529837
Zcchc24	2.72e-12	-0.294927	0.26	0.333	5.44e-08
BC002059	0.269274	-0.294838	0.02	0.023	1
Zfp672	1.89e-07	-0.294766	0.123	0.162	0.00377192
Zbtb11os1	1.36e-06	-0.294707	0.074	0.103	0.0270969
Ift140	0.0778508	-0.294453	0.025	0.03	1
Prim2	0.000375395	-0.294435	0.036	0.051	1
Brwd3	0.0162945	-0.294383	0.035	0.044	1
Limk1	0.089182	-0.294348	0.009	0.013	1
Asb5	0.00285105	-0.294213	0.057	0.072	1
Synj1	0.00483373	-0.294202	0.038	0.05	1
Bbs9	0.0204413	-0.2942	0.031	0.04	1
Cbr1	2.76e-10	-0.294129	0.165	0.219	5.52e-06
Zswim1	0.00198757	-0.294121	0.033	0.045	1
Gin1	0.000156094	-0.293989	0.057	0.077	1
Hif1a	6.23e-19	-0.293932	0.413	0.513	1.25e-14
Gins3	0.0116291	-0.293707	0.02	0.027	1
P4ha3	0.210002	-0.293581	0.018	0.021	1
Asb8	3.74e-10	-0.29313	0.168	0.223	7.47e-06
Mcts2	4.54e-05	-0.292899	0.062	0.084	0.90765
Rnaset2a	2.31e-09	-0.292781	0.213	0.267	4.61e-05
Pigx	9.34e-09	-0.29246	0.177	0.227	0.00018657
Mien1	1.96e-14	-0.292288	0.339	0.42	3.91e-10
Hilpda	3.27e-06	-0.292242	0.071	0.098	0.0653228
Romo1	1.79e-34	-0.29222	0.713	0.801	3.58e-30
B3glct	2.48e-05	-0.292017	0.088	0.114	0.495634
Fkbp7	9.45e-20	-0.291732	0.494	0.594	1.89e-15
Megf9	0.00127669	-0.291647	0.058	0.074	1
Eral1	0.000995976	-0.291633	0.054	0.071	1
Ddost	6.8e-31	-0.291625	0.677	0.773	1.36e-26
Nat2	0.00146116	-0.291554	0.026	0.038	1
Cwf19l1	0.0104059	-0.291488	0.016	0.023	1
Rab23	1.57e-08	-0.291125	0.145	0.19	0.000313921
Cdo1	1.06e-17	-0.291097	0.349	0.444	2.13e-13
Grk3	0.00031538	-0.290936	0.044	0.061	1
Cd164	2e-13	-0.290587	0.292	0.369	3.99e-09
Gpr161	0.0377272	-0.290189	0.034	0.042	1
Nhlrc3	0.0462464	-0.290026	0.038	0.046	1
Arpc5	2.44e-14	-0.289801	0.388	0.471	4.87e-10
AI413582	1.4e-05	-0.289777	0.055	0.077	0.280128
Fibin	2.44e-17	-0.289676	0.509	0.605	4.87e-13
Pgd	2.12e-07	-0.289606	0.134	0.173	0.00424057
Edem2	4.42e-06	-0.289512	0.082	0.111	0.0883528
Dnlz	7.32e-13	-0.289479	0.335	0.41	1.46e-08
Rbmx	7.05e-09	-0.289469	0.113	0.154	0.000140973
Sgsh	0.00254065	-0.28944	0.042	0.055	1
Armt1	3.94e-06	-0.289336	0.071	0.098	0.0788111
Mlxip	0.00343915	-0.289315	0.065	0.08	1
Alpk3	0.062555	-0.2893	0.014	0.019	1
BC052040	0.0633284	-0.289216	0.021	0.027	1
Ap3m1	5.1e-15	-0.289171	0.238	0.315	1.02e-10
Ccdc66	1.66e-07	-0.289115	0.111	0.148	0.00332324
Tmem97	1.6e-05	-0.288838	0.083	0.109	0.318918
1810058I24Rik	8.17e-23	-0.288741	0.521	0.633	1.63e-18
Prkcz	0.0155258	-0.288738	0.016	0.023	1
Pltp	4.23e-05	-0.288294	0.111	0.139	0.844411
Mad2l1	0.00179952	-0.288172	0.022	0.032	1
Tmem101	2.56e-06	-0.288162	0.081	0.11	0.0512046
Acy1	0.000228609	-0.288065	0.04	0.056	1
2310040G24Rik	0.0394064	-0.288011	0.014	0.019	1
Ercc5	5.86e-06	-0.28779	0.078	0.105	0.117057
Atxn7l2	0.466755	-0.287781	0.014	0.015	1
Dcun1d4	0.000466429	-0.287766	0.041	0.057	1
Mtx2	2.67e-09	-0.287729	0.164	0.215	5.34e-05
Sec61b	1.19e-31	-0.287688	0.697	0.792	2.37e-27
Zkscan14	0.0236211	-0.287632	0.026	0.033	1
Zfp931	2.09e-09	-0.287628	0.138	0.187	4.18e-05
Tkfc	0.0600249	-0.287505	0.029	0.036	1
Sept9	1.06e-13	-0.287493	0.25	0.324	2.11e-09
Ccdc39	0.105151	-0.287486	0.02	0.025	1
Snrpe	1.65e-25	-0.287354	0.568	0.669	3.3e-21
Smarcd2	5.04e-06	-0.287198	0.089	0.119	0.100709
Cox20	2.14e-22	-0.287174	0.555	0.653	4.28e-18
Zfp260	2.27e-12	-0.287067	0.224	0.293	4.55e-08
Ust	0.000409529	-0.287048	0.052	0.069	1
Lrp1	2.89e-22	-0.286708	0.499	0.607	5.77e-18
Ogfod1	0.000327403	-0.286701	0.038	0.054	1
4933427D14Rik	0.0482384	-0.286509	0.019	0.025	1
Nqo1	1.02e-11	-0.286323	0.22	0.285	2.04e-07
Rrnad1	3.06e-05	-0.28619	0.109	0.138	0.61104
Napb	0.0243627	-0.286168	0.026	0.034	1
Wdr35	0.000525878	-0.285935	0.063	0.081	1
Dync2li1	5.45e-08	-0.285449	0.13	0.172	0.0010887
Znrf3	2.72e-08	-0.28519	0.098	0.137	0.000543735
Adam15	1.36e-13	-0.285177	0.24	0.315	2.72e-09
Naa38	5.33e-19	-0.285103	0.389	0.49	1.06e-14
Surf2	1.82e-10	-0.285086	0.175	0.231	3.63e-06
Crtap	1.22e-15	-0.284734	0.435	0.522	2.44e-11
Garem1	0.0669226	-0.284555	0.034	0.041	1
[truncated: 9,768 more rows]
