# Supplementary material for: Intrinsic Gata4 expression sensitizes the aortic root to dilation in a Loeys-Dietz syndrome mouse model
Source: Research Square preprint supplement (doi:10.21203/rs.3.rs-4420617/v1), 2024-06-05
Supplement: Supplementary file 5 [file Supplemental Table 2.xlsx]

## Sheet: Human_Orthologue_for_ClueGO
Supplemental Table 2.
List of transcripts differentially detected in mouse Tgfbr1M318R/+ VSMCs relative to Tgfbr1+/+ VSMCs (Pct >0.2 in higher expressing sample, Adj P<0.05, Abs FC > 0.25) and conversion to Human Orthologue prior to ClueGo and EnrichR analysis. Analysis log and enrichment results are shown in subsequent tabs.
Downregulated Transcripts in mouse LDS VSMCs v Control VSMCs
initial_mouse_gene	initial_ensg	Human ortholog_name	ortholog_ensg
Hsd17b8	ENSMUSG00000073422	HSD17B8	ENSG00000204228
1110059G10Rik	ENSMUSG00000032551	KIAA1143	ENSG00000163807
2310011J03Rik	ENSMUSG00000020133	C19orf25	ENSG00000119559
A4galt	ENSMUSG00000047878	A4GALT	ENSG00000128274
Abcc1	ENSMUSG00000023088	ABCC1	ENSG00000103222
Abcc9	ENSMUSG00000030249	ABCC9	ENSG00000069431
Abhd8	ENSMUSG00000007950	ABHD8	ENSG00000127220
Abi3bp	ENSMUSG00000035258	ABI3BP	ENSG00000154175
Ace	ENSMUSG00000020681	ACE	ENSG00000159640
Actg2	ENSMUSG00000059430	ACTG2	ENSG00000163017
Acyp1	ENSMUSG00000008822	ACYP1	ENSG00000119640
Adam10	ENSMUSG00000054693	ADAM10	ENSG00000137845
Adam15	ENSMUSG00000028041	ADAM15	ENSG00000143537
Adamts10	ENSMUSG00000024299	ADAMTS10	ENSG00000142303
Adamts2	ENSMUSG00000036545	ADAMTS2	ENSG00000087116
Adcy7	ENSMUSG00000031659	ADCY7	ENSG00000121281
Adm	ENSMUSG00000030790	ADM	ENSG00000148926
Ahnak2	ENSMUSG00000118667	AHNAK2	ENSG00000185567
Aig1	ENSMUSG00000019806	AIG1	ENSG00000146416
Ak1	ENSMUSG00000026817	AK1	ENSG00000106992
Alcam	ENSMUSG00000022636	ALCAM	ENSG00000170017
Alg14	ENSMUSG00000039887	ALG14	ENSG00000172339
Anapc7	ENSMUSG00000029466	ANAPC7	ENSG00000196510
Angptl2	ENSMUSG00000004105	ANGPTL2	ENSG00000136859
Ank	ENSMUSG00000022265	ANKH	ENSG00000154122
Anxa2	ENSMUSG00000032231	ANXA2	ENSG00000182718
Ap3m1	ENSMUSG00000021824	AP3M1	ENSG00000185009
Aqp1	ENSMUSG00000004655	AQP1	ENSG00000240583
Araf	ENSMUSG00000001127	ARAF	ENSG00000078061
Arpc5	ENSMUSG00000008475	ARPC5	ENSG00000162704
Arpc5l	ENSMUSG00000026755	ARPC5L	ENSG00000136950
Arrdc3	ENSMUSG00000074794	ARRDC3	ENSG00000113369
Asb2	ENSMUSG00000021200	ASB2	ENSG00000100628
Asb8	ENSMUSG00000048175	ASB8	ENSG00000177981
Asph	ENSMUSG00000028207	ASPH	ENSG00000198363
Atcayos	ENSMUSG00000085779	N/A	N/A
Atp1a2	ENSMUSG00000007097	ATP1A2	ENSG00000018625
Atp1b1	ENSMUSG00000026576	ATP1B1	ENSG00000143153
B4galt1	ENSMUSG00000028413	B4GALT1	ENSG00000086062
Bag2	ENSMUSG00000042215	BAG2	ENSG00000112208
Bbln	ENSMUSG00000039195	BBLN	ENSG00000171159
Bdh1	ENSMUSG00000046598	BDH1	ENSG00000161267
Bin1	ENSMUSG00000024381	BIN1	ENSG00000136717
Bmp1	ENSMUSG00000022098	BMP1	ENSG00000168487
Bmp3	ENSMUSG00000029335	BMP3	ENSG00000152785
Bmyc	ENSMUSG00000049086	MYC	ENSG00000136997
Bola1	ENSMUSG00000015943	BOLA1	ENSG00000178096
Bpnt2	ENSMUSG00000066324	BPNT2	ENSG00000104331
Brd7	ENSMUSG00000031660	BRD7	ENSG00000166164
Brip1	ENSMUSG00000034329	BRIP1	ENSG00000136492
Bud31	ENSMUSG00000038722	BUD31	ENSG00000106245
C1qtnf2	ENSMUSG00000046491	C1QTNF2	ENSG00000145861
Calu	ENSMUSG00000029767	CALU	ENSG00000128595
Cat	ENSMUSG00000027187	CAT	ENSG00000121691
Cav3	ENSMUSG00000062694	CAV3	ENSG00000182533
Cbr1	ENSMUSG00000051483	CBR1	ENSG00000159228
Ccdc42	ENSMUSG00000045915	CCDC42	ENSG00000161973
Ccdc9b	ENSMUSG00000045838	CCDC9B	ENSG00000188549
Ccn5	ENSMUSG00000027656	CCN5	ENSG00000064205
Cd164	ENSMUSG00000019818	CD164	ENSG00000135535
Cd302	ENSMUSG00000060703	CD302	ENSG00000241399
Cd59a	ENSMUSG00000032679	CD59	ENSG00000085063
Cd74	ENSMUSG00000024610	CD74	ENSG00000019582
Cdh13	ENSMUSG00000031841	CDH13	ENSG00000140945
Cdipt	ENSMUSG00000030682	CDIPT	ENSG00000103502
Cdo1	ENSMUSG00000033022	CDO1	ENSG00000129596
Cep20	ENSMUSG00000022677	CEP20	ENSG00000133393
Cfap298	ENSMUSG00000022972	CFAP298	ENSG00000159079
Clcn3	ENSMUSG00000004319	CLCN3	ENSG00000109572
Clip4	ENSMUSG00000024059	CLIP4	ENSG00000115295
Cmtm7	ENSMUSG00000032436	CMTM7	ENSG00000153551
Cndp1	ENSMUSG00000056162	CNDP1	ENSG00000150656
Col14a1	ENSMUSG00000022371	COL14A1	ENSG00000187955
Col15a1	ENSMUSG00000028339	COL15A1	ENSG00000204291
Col1a1	ENSMUSG00000001506	COL1A1	ENSG00000108821
Col1a2	ENSMUSG00000029661	COL1A2	ENSG00000164692
Col3a1	ENSMUSG00000026043	COL3A1	ENSG00000168542
Col4a5	ENSMUSG00000031274	COL4A5	ENSG00000188153
Col4a6	ENSMUSG00000031273	COL4A6	ENSG00000197565
Col5a1	ENSMUSG00000026837	COL5A1	ENSG00000130635
Col5a2	ENSMUSG00000026042	COL5A2	ENSG00000204262
Col6a1	ENSMUSG00000001119	COL6A1	ENSG00000142156
Col6a2	ENSMUSG00000020241	COL6A2	ENSG00000142173
Col6a3	ENSMUSG00000048126	COL6A3	ENSG00000163359
Colgalt1	ENSMUSG00000034807	COLGALT1	ENSG00000130309
Comtd1	ENSMUSG00000021773	COMTD1	ENSG00000165644
Cox18	ENSMUSG00000035505	COX18	ENSG00000163626
Cox20	ENSMUSG00000026500	COX20	ENSG00000203667
Cpped1	ENSMUSG00000065979	CPPED1	ENSG00000103381
Creb3l1	ENSMUSG00000027230	CREB3L1	ENSG00000157613
Creb5	ENSMUSG00000053007	CREB5	ENSG00000146592
Crispld2	ENSMUSG00000031825	CRISPLD2	ENSG00000103196
Crtap	ENSMUSG00000032431	CRTAP	ENSG00000170275
Cstf3	ENSMUSG00000027176	CSTF3	ENSG00000176102
CT025619.1	N/A	N/A	N/A
Ctnnb1	ENSMUSG00000006932	CTNNB1	ENSG00000168036
Ctsb	ENSMUSG00000021939	CTSB	ENSG00000164733
Ctsc	ENSMUSG00000030560	CTSC	ENSG00000109861
Ctsh	ENSMUSG00000032359	CTSH	ENSG00000103811
Cuta	ENSMUSG00000024194	CUTA	ENSG00000112514
Cxcl12	ENSMUSG00000061353	CXCL12	ENSG00000107562
Cxxc1	ENSMUSG00000024560	CXXC1	ENSG00000154832
Cyb561	ENSMUSG00000019590	CYB561	ENSG00000008283
Cyb5b	ENSMUSG00000031924	CYB5B	ENSG00000103018
Cyba	ENSMUSG00000006519	CYBA	ENSG00000051523
Czib	ENSMUSG00000028608	CZIB	ENSG00000162384
Dbi	ENSMUSG00000026385	DBI	ENSG00000155368
Dbn1	ENSMUSG00000034675	DBN1	ENSG00000113758
Dcn	ENSMUSG00000019929	DCN	ENSG00000011465
Ddost	ENSMUSG00000028757	DDOST	ENSG00000244038
Ddr2	ENSMUSG00000026674	DDR2	ENSG00000162733
Ddx17	ENSMUSG00000055065	DDX17	ENSG00000100201
Ddx3x	ENSMUSG00000000787	DDX3X	ENSG00000215301
Dhrs3	ENSMUSG00000066026	DHRS3	ENSG00000162496
Dhrs7	ENSMUSG00000021094	DHRS7	ENSG00000100612
Diablo	ENSMUSG00000029433	DIABLO	ENSG00000184047
Dkk3	ENSMUSG00000030772	DKK3	ENSG00000050165
Dlgap1	ENSMUSG00000003279	DLGAP1	ENSG00000170579
Dnlz	ENSMUSG00000075467	DNLZ	ENSG00000213221
Dsp	ENSMUSG00000054889	DSP	ENSG00000096696
Dynlrb1	ENSMUSG00000047459	DYNLRB1	ENSG00000125971
Ebpl	ENSMUSG00000021928	EBPL	ENSG00000123179
Ecm1	ENSMUSG00000028108	ECM1	ENSG00000143369
Efemp2	ENSMUSG00000024909	EFEMP2	ENSG00000172638
Eif3j2	ENSMUSG00000043424	EIF3J	ENSG00000104131
Eln	ENSMUSG00000029675	ELN	ENSG00000049540
Emc6	ENSMUSG00000047260	EMC6	ENSG00000127774
Emc8	ENSMUSG00000031819	EMC8	ENSG00000131148
Emd	ENSMUSG00000001964	EMD	ENSG00000102119
Emp3	ENSMUSG00000040212	EMP3	ENSG00000142227
Enpp5	ENSMUSG00000023960	ENPP5	ENSG00000112796
Erg28	ENSMUSG00000021252	ERG28	ENSG00000133935
Erh	ENSMUSG00000021131	ERH	ENSG00000100632
F2r	ENSMUSG00000048376	F2R	ENSG00000181104
Fabp3	ENSMUSG00000028773	FABP3	ENSG00000121769
Fam162a	ENSMUSG00000003955	FAM162A	ENSG00000114023
Fam81a	ENSMUSG00000032224	FAM81A	ENSG00000157470
Fbln1	ENSMUSG00000006369	FBLN1	ENSG00000077942
Fbln5	ENSMUSG00000021186	FBLN5	ENSG00000140092
Fbn1	ENSMUSG00000027204	FBN1	ENSG00000166147
Fbxl22	ENSMUSG00000050503	FBXL22	ENSG00000197361
Fdps	ENSMUSG00000059743	FDPS	ENSG00000160752
Fgfrl1	ENSMUSG00000008090	FGFRL1	ENSG00000127418
Fhl1	ENSMUSG00000023092	FHL1	ENSG00000022267
Fibin	ENSMUSG00000074971	FIBIN	ENSG00000176971
Fis1	ENSMUSG00000019054	FIS1	ENSG00000214253
Fkbp10	ENSMUSG00000001555	FKBP10	ENSG00000141756
Fkbp7	ENSMUSG00000002732	FKBP7	ENSG00000079150
Fkbp9	ENSMUSG00000029781	FKBP9	ENSG00000122642
Flnc	ENSMUSG00000068699	FLNC	ENSG00000128591
Fn1	ENSMUSG00000026193	FN1	ENSG00000115414
Fndc3b	ENSMUSG00000039286	FNDC3B	ENSG00000075420
Foxo1	ENSMUSG00000044167	FOXO1	ENSG00000150907
Frzb	ENSMUSG00000027004	FRZB	ENSG00000162998
Fstl1	ENSMUSG00000022816	FSTL1	ENSG00000163430
Fubp1	ENSMUSG00000028034	FUBP1	ENSG00000162613
Fzd2	ENSMUSG00000050288	FZD2	ENSG00000180340
Gaa	ENSMUSG00000025579	GAA	ENSG00000171298
Galnt16	ENSMUSG00000021130	GALNT16	ENSG00000100626
Gamt	ENSMUSG00000020150	GAMT	ENSG00000130005
Gas1	ENSMUSG00000052957	GAS1	ENSG00000180447
Gas6	ENSMUSG00000031451	GAS6	ENSG00000183087
Ggcx	ENSMUSG00000053460	GGCX	ENSG00000115486
Gja1	ENSMUSG00000050953	GJA1	ENSG00000152661
Glrx	ENSMUSG00000021591	GLRX	ENSG00000173221
Gm10076	ENSMUSG00000060143	N/A	N/A
Gm15417	ENSMUSG00000074466	N/A	N/A
Gns	ENSMUSG00000034707	GNS	ENSG00000135677
Gpx7	ENSMUSG00000028597	GPX7	ENSG00000116157
Grn	ENSMUSG00000034708	GRN	ENSG00000030582
Gsn	ENSMUSG00000026879	GSN	ENSG00000148180
Gstm5	ENSMUSG00000004032	GSTM3	ENSG00000134202
Gstt1	ENSMUSG00000001663	GSTT1	N/A
Gstt2	ENSMUSG00000033318	GSTT2	ENSG00000099984
Gusb	ENSMUSG00000025534	GUSB	ENSG00000169919
Gxylt2	ENSMUSG00000030074	GXYLT2	ENSG00000172986
H1f0	ENSMUSG00000096210	H1-0	ENSG00000189060
H1f2	ENSMUSG00000036181	H1-2	ENSG00000187837
H2-D1	ENSMUSG00000073411	HLA-A	ENSG00000206503
Hacd4	ENSMUSG00000028497	HACD4	ENSG00000188921
Haghl	ENSMUSG00000061046	HAGHL	ENSG00000103253
Hax1	ENSMUSG00000027944	HAX1	ENSG00000143575
Hebp1	ENSMUSG00000042770	HEBP1	ENSG00000013583
Hexa	ENSMUSG00000025232	HEXA	ENSG00000213614
Hexb	ENSMUSG00000021665	HEXB	ENSG00000049860
Heyl	ENSMUSG00000032744	HEYL	ENSG00000163909
Hif1a	ENSMUSG00000021109	HIF1A	ENSG00000100644
Hmgcs1	ENSMUSG00000093930	HMGCS1	ENSG00000112972
Hmgcs2	ENSMUSG00000027875	HMGCS2	ENSG00000134240
Hmgn1	ENSMUSG00000040681	HMGN1	ENSG00000205581
Hmgn2	ENSMUSG00000003038	HMGN2	ENSG00000198830
Hnrnph3	ENSMUSG00000020069	HNRNPH3	ENSG00000096746
Hoxb3os	ENSMUSG00000084844	HOXB-AS1	ENSG00000230148
Hsf2	ENSMUSG00000019878	HSF2	ENSG00000025156
Hspa14	ENSMUSG00000109865	HSPA14	ENSG00000187522
Hspa1a	ENSMUSG00000091971	HSPA1A	ENSG00000204389
Hspa1b	ENSMUSG00000090877	HSPA1B	ENSG00000204388
Hspa2	ENSMUSG00000059970	HSPA2	ENSG00000126803
Hspb6	ENSMUSG00000036854	HSPB6	ENSG00000004776
Hspb8	ENSMUSG00000041548	HSPB8	ENSG00000152137
Htra1	ENSMUSG00000006205	HTRA1	ENSG00000166033
Htra3	ENSMUSG00000029096	HTRA3	ENSG00000170801
Hyou1	ENSMUSG00000032115	HYOU1	ENSG00000149428
Idi1	ENSMUSG00000058258	IDI1	ENSG00000067064
Igsf8	ENSMUSG00000038034	IGSF8	ENSG00000162729
Igsf9b	ENSMUSG00000034275	IGSF9B	ENSG00000080854
Ikbip	ENSMUSG00000019975	IKBIP	ENSG00000166130
Impa1	ENSMUSG00000027531	IMPA1	ENSG00000133731
Insig1	ENSMUSG00000045294	INSIG1	ENSG00000186480
Itfg1	ENSMUSG00000031703	ITFG1	ENSG00000129636
Itga5	ENSMUSG00000000555	ITGA5	ENSG00000161638
Itga9	ENSMUSG00000039115	ITGA9	ENSG00000144668
Itgb3	ENSMUSG00000020689	ITGB3	ENSG00000259207
Itih4	ENSMUSG00000021922	ITIH4	ENSG00000055955
Kcnj15	ENSMUSG00000062609	KCNJ15	ENSG00000157551
Kdelr3	ENSMUSG00000010830	KDELR3	ENSG00000100196
Kdsr	ENSMUSG00000009905	KDSR	ENSG00000119537
Lamc1	ENSMUSG00000026478	LAMC1	ENSG00000135862
Lamp1	ENSMUSG00000031447	LAMP1	ENSG00000185896
Laptm4a	ENSMUSG00000020585	LAPTM4A	ENSG00000068697
Laptm4b	ENSMUSG00000022257	LAPTM4B	ENSG00000104341
Lars2	ENSMUSG00000035202	LARS2	ENSG00000011376
Ldb2	ENSMUSG00000039706	LDB2	ENSG00000169744
Lgmn	ENSMUSG00000021190	LGMN	ENSG00000100600
Lgr6	ENSMUSG00000042793	LGR6	ENSG00000133067
Loxl1	ENSMUSG00000032334	LOXL1	ENSG00000129038
Loxl3	ENSMUSG00000000693	LOXL3	ENSG00000115318
Lratd1	ENSMUSG00000020607	LRATD1	ENSG00000162981
Lrp1	ENSMUSG00000040249	LRP1	ENSG00000123384
Lrrc17	ENSMUSG00000039883	LRRC17	ENSG00000128606
Lsm2	ENSMUSG00000007050	LSM2	ENSG00000204392
Ltbp1	ENSMUSG00000001870	LTBP1	ENSG00000049323
Ltbp3	ENSMUSG00000024940	LTBP3	ENSG00000168056
Ltbr	ENSMUSG00000030339	LTBR	ENSG00000111321
Lum	ENSMUSG00000036446	LUM	ENSG00000139329
Lysmd2	ENSMUSG00000032184	LYSMD2	ENSG00000140280
Macroh2a2	ENSMUSG00000020086	MACROH2A2	ENSG00000099284
Magohb	ENSMUSG00000030188	MAGOHB	ENSG00000111196
Map3k7cl	ENSMUSG00000025610	MAP3K7CL	ENSG00000156265
Mecp2	ENSMUSG00000031393	MECP2	ENSG00000169057
Med31	ENSMUSG00000020801	MED31	ENSG00000108590
Med7	ENSMUSG00000020397	MED7	ENSG00000155868
Mettl1	ENSMUSG00000006732	METTL1	ENSG00000037897
Mfap4	ENSMUSG00000042436	MFAP4	ENSG00000166482
Mfap5	ENSMUSG00000030116	MFAP5	ENSG00000197614
Mfsd10	ENSMUSG00000001082	MFSD10	ENSG00000109736
Mgp	ENSMUSG00000030218	MGP	ENSG00000111341
Mgst1	ENSMUSG00000008540	MGST1	ENSG00000008394
Mien1	ENSMUSG00000002580	MIEN1	ENSG00000141741
Mmd	ENSMUSG00000003948	MMD	ENSG00000108960
Mmp17	ENSMUSG00000029436	MMP17	ENSG00000198598
Mmp23	ENSMUSG00000029061	MMP23B	ENSG00000189409
Mn1	ENSMUSG00000070576	MN1	ENSG00000169184
Morf4l2	ENSMUSG00000031422	MORF4L2	ENSG00000123562
Mrgprf	ENSMUSG00000031070	MRGPRF	ENSG00000172935
Mrpl17	ENSMUSG00000030879	MRPL17	ENSG00000158042
Mrpl27	ENSMUSG00000024414	MRPL27	ENSG00000108826
Mrpl36	ENSMUSG00000021607	MRPL36	ENSG00000171421
Mrpl41	ENSMUSG00000036850	MRPL41	ENSG00000182154
Mrpl50	ENSMUSG00000044018	MRPL50	ENSG00000136897
Mrps28	ENSMUSG00000040269	MRPS28	ENSG00000147586
Mrps34	ENSMUSG00000038880	MRPS34	ENSG00000074071
Msmo1	ENSMUSG00000031604	MSMO1	ENSG00000052802
Msrb1	ENSMUSG00000075705	MSRB1	ENSG00000198736
Mtss1	ENSMUSG00000022353	MTSS1	ENSG00000170873
Mtus1	ENSMUSG00000045636	MTUS1	ENSG00000129422
Mtx2	ENSMUSG00000027099	MTX2	ENSG00000128654
Mxra7	ENSMUSG00000020814	MXRA7	ENSG00000182534
Mydgf	ENSMUSG00000019579	MYDGF	ENSG00000074842
Mylk4	ENSMUSG00000044951	MYLK4	ENSG00000145949
Naa38	ENSMUSG00000059278	NAA38	ENSG00000183011
Naxe	ENSMUSG00000028070	NAXE	ENSG00000163382
Ncam1	ENSMUSG00000039542	NCAM1	ENSG00000149294
Ndufa8	ENSMUSG00000026895	NDUFA8	ENSG00000119421
Ndufaf4	ENSMUSG00000028261	NDUFAF4	ENSG00000123545
Ndufb2	ENSMUSG00000002416	NDUFB2	ENSG00000090266
Ndufs4	ENSMUSG00000021764	NDUFS4	ENSG00000164258
Ndufv2	ENSMUSG00000024099	NDUFV2	ENSG00000178127
Ndufv3	ENSMUSG00000024038	NDUFV3	ENSG00000160194
Nemf	ENSMUSG00000020982	NEMF	ENSG00000165525
Nes	ENSMUSG00000004891	NES	ENSG00000132688
Nfix	ENSMUSG00000001911	NFIX	ENSG00000008441
Nkd1	ENSMUSG00000031661	NKD1	ENSG00000140807
Nme1	ENSMUSG00000037601	NME1	ENSG00000239672
Nme2	ENSMUSG00000020857	NME2	ENSG00000243678
Npas2	ENSMUSG00000026077	NPAS2	ENSG00000170485
Npdc1	ENSMUSG00000015094	NPDC1	ENSG00000107281
Npr1	ENSMUSG00000027931	NPR1	ENSG00000169418
Nqo1	ENSMUSG00000003849	NQO1	ENSG00000181019
Nr1d1	ENSMUSG00000020889	NR1D1	ENSG00000126368
Ntn1	ENSMUSG00000020902	NTN1	ENSG00000065320
Nucb1	ENSMUSG00000030824	NUCB1	ENSG00000104805
Nucb2	ENSMUSG00000030659	NUCB2	ENSG00000070081
Nudt18	ENSMUSG00000045211	NUDT18	ENSG00000275074
Nxf1	ENSMUSG00000010097	NXF1	ENSG00000162231
Ogdh	ENSMUSG00000020456	OGDH	ENSG00000105953
Olfml2b	ENSMUSG00000038463	OLFML2B	ENSG00000162745
Optc	ENSMUSG00000010311	OPTC	ENSG00000188770
Osbpl3	ENSMUSG00000029822	OSBPL3	ENSG00000070882
Osr1	ENSMUSG00000048387	OSR1	ENSG00000143867
Ostc	ENSMUSG00000041084	OSTC	ENSG00000198856
Otud1	ENSMUSG00000043415	OTUD1	ENSG00000165312
P3h3	ENSMUSG00000023191	P3H3	ENSG00000110811
P4ha2	ENSMUSG00000018906	P4HA2	ENSG00000072682
P4htm	ENSMUSG00000006675	P4HTM	ENSG00000178467
Palm	ENSMUSG00000035863	PALM	ENSG00000099864
Pam	ENSMUSG00000026335	PAM	ENSG00000145730
Pamr1	ENSMUSG00000027188	PAMR1	ENSG00000149090
Parp3	ENSMUSG00000023249	PARP3	ENSG00000041880
Pcolce2	ENSMUSG00000015354	PCOLCE2	ENSG00000163710
Pde1a	ENSMUSG00000059173	PDE1A	ENSG00000115252
Pdgfrb	ENSMUSG00000024620	PDGFRB	ENSG00000113721
Pdgfrl	ENSMUSG00000031595	PDGFRL	ENSG00000104213
Pdlim4	ENSMUSG00000020388	PDLIM4	ENSG00000131435
Pfn1	ENSMUSG00000018293	PFN1	ENSG00000108518
Pfn2	ENSMUSG00000027805	PFN2	ENSG00000070087
Phyh	ENSMUSG00000026664	PHYH	ENSG00000107537
Pi15	ENSMUSG00000067780	PI15	ENSG00000137558
Pid1	ENSMUSG00000045658	PID1	ENSG00000153823
Pigp	ENSMUSG00000022940	PIGP	ENSG00000185808
Pigt	ENSMUSG00000017721	PIGT	ENSG00000124155
Pigx	ENSMUSG00000023791	PIGX	ENSG00000163964
Pigyl	ENSMUSG00000010607	PIGY	ENSG00000255072
Pkd2	ENSMUSG00000034462	PKD2	ENSG00000118762
Plgrkt	ENSMUSG00000016495	PLGRKT	ENSG00000107020
Plvap	ENSMUSG00000034845	PLVAP	ENSG00000130300
Plxdc2	ENSMUSG00000026748	PLXDC2	ENSG00000120594
Pmepa1	ENSMUSG00000038400	PMEPA1	ENSG00000124225
Pmp22	ENSMUSG00000018217	PMP22	ENSG00000109099
Pnck	ENSMUSG00000002012	PNCK	ENSG00000130822
Podxl2	ENSMUSG00000033152	PODXL2	ENSG00000114631
Polr2d	ENSMUSG00000024258	POLR2D	ENSG00000144231
Polr2i	ENSMUSG00000019738	POLR2I	ENSG00000105258
Polr2l	ENSMUSG00000038489	POLR2L	ENSG00000177700
Pon3	ENSMUSG00000029759	PON3	ENSG00000105852
Postn	ENSMUSG00000027750	POSTN	ENSG00000133110
Ppdpf	ENSMUSG00000016344	PPDPF	ENSG00000125534
Ppic	ENSMUSG00000024538	PPIC	ENSG00000168938
Ppil3	ENSMUSG00000026035	PPIL3	ENSG00000240344
Praf2	ENSMUSG00000031149	PRAF2	ENSG00000243279
Prdm6	ENSMUSG00000069378	PRDM6	ENSG00000061455
Prelp	ENSMUSG00000041577	PRELP	ENSG00000188783
Prkab2	ENSMUSG00000038205	PRKAB2	ENSG00000131791
Prkd3	ENSMUSG00000024070	PRKD3	ENSG00000115825
Prnp	ENSMUSG00000079037	PRNP	ENSG00000171867
Prorsd1	ENSMUSG00000032673	PRORSD1	ENSG00000162997
Prps2	ENSMUSG00000025742	PRPS2	ENSG00000101911
Prrx1	ENSMUSG00000026586	PRRX1	ENSG00000116132
Psap	ENSMUSG00000004207	PSAP	ENSG00000197746
Psmd14	ENSMUSG00000026914	PSMD14	ENSG00000115233
Ptprs	ENSMUSG00000013236	PTPRS	ENSG00000105426
Qdpr	ENSMUSG00000015806	QDPR	ENSG00000151552
Qpct	ENSMUSG00000024084	QPCT	ENSG00000115828
Rab34	ENSMUSG00000002059	RAB34	ENSG00000109113
Ramp1	ENSMUSG00000034353	RAMP1	ENSG00000132329
Rasl12	ENSMUSG00000041696	RASL12	ENSG00000103710
Rbmxl1	ENSMUSG00000037070	RBMXL1	ENSG00000213516
Rbpj	ENSMUSG00000039191	RBPJ	ENSG00000168214
Rc3h2	ENSMUSG00000075376	RC3H2	ENSG00000056586
Rcn1	ENSMUSG00000005973	RCN1	ENSG00000049449
Rdm1	ENSMUSG00000010362	RDM1	ENSG00000278023
Rgs4	ENSMUSG00000038530	RGS4	ENSG00000117152
Rgs5	ENSMUSG00000026678	RGS5	ENSG00000143248
Rhoq	ENSMUSG00000024143	RHOQ	ENSG00000119729
Rnaset2b	ENSMUSG00000094724	RNASET2	ENSG00000026297
Rnf19a	ENSMUSG00000022280	RNF19A	ENSG00000034677
Romo1	ENSMUSG00000067847	ROMO1	ENSG00000125995
Rpl10a	ENSMUSG00000037805	RPL10A	ENSG00000198755
Rpl7l1	ENSMUSG00000063888	RPL7L1	ENSG00000146223
Rps27l	ENSMUSG00000036781	RPS27L	ENSG00000185088
Rsrp1	ENSMUSG00000037266	RSRP1	ENSG00000117616
S100a10	ENSMUSG00000041959	S100A10	ENSG00000197747
S100a16	ENSMUSG00000074457	S100A16	ENSG00000188643
Sbds	ENSMUSG00000025337	SBDS	ENSG00000126524
Sc5d	ENSMUSG00000032018	SC5D	ENSG00000109929
Scara3	ENSMUSG00000034463	SCARA3	ENSG00000168077
Scarb2	ENSMUSG00000029426	SCARB2	ENSG00000138760
Scpep1	ENSMUSG00000000278	SCPEP1	ENSG00000121064
Sdhaf1	ENSMUSG00000074211	SDHAF1	ENSG00000205138
Sdhaf4	ENSMUSG00000026154	SDHAF4	ENSG00000154079
Sec11c	ENSMUSG00000024516	SEC11C	ENSG00000166562
Sec24d	ENSMUSG00000039234	SEC24D	ENSG00000150961
Sec61b	ENSMUSG00000053317	SEC61B	ENSG00000106803
Selenom	ENSMUSG00000075702	SELENOM	ENSG00000198832
Selenop	ENSMUSG00000064373	SELENOP	ENSG00000250722
Sema3c	ENSMUSG00000028780	SEMA3C	ENSG00000075223
Sema3d	ENSMUSG00000040254	SEMA3D	ENSG00000153993
Septin9	ENSMUSG00000059248	SEPTIN9	ENSG00000184640
Serpine2	ENSMUSG00000026249	SERPINE2	ENSG00000135919
Serpinh1	ENSMUSG00000070436	SERPINH1	ENSG00000149257
Setd7	ENSMUSG00000037111	SETD7	ENSG00000145391
Sf3b6	ENSMUSG00000037361	SF3B6	ENSG00000115128
Sgcd	ENSMUSG00000020354	SGCD	ENSG00000170624
Sgcg	ENSMUSG00000035296	SGCG	ENSG00000102683
Sh3bgr	ENSMUSG00000040666	SH3BGR	ENSG00000185437
Sh3pxd2a	ENSMUSG00000053617	SH3PXD2A	ENSG00000107957
Shisa4	ENSMUSG00000041889	SHISA4	ENSG00000198892
Slc25a23	ENSMUSG00000046329	SLC25A23	ENSG00000125648
Slc35b1	ENSMUSG00000020873	SLC35B1	ENSG00000121073
Slc38a1	ENSMUSG00000023169	SLC38A1	ENSG00000111371
Slc39a1	ENSMUSG00000052310	SLC39A1	ENSG00000143570
Slc66a3	ENSMUSG00000045679	SLC66A3	ENSG00000162976
Slirp	ENSMUSG00000021040	SLIRP	ENSG00000119705
Smarca2	ENSMUSG00000024921	SMARCA2	ENSG00000080503
Smim20	ENSMUSG00000061461	SMIM20	ENSG00000250317
Smim27	ENSMUSG00000028407	SMIM27	NSG00000235453
Smim3	ENSMUSG00000038059	SMIM3	ENSG00000256235
Smim5	ENSMUSG00000048442	SMIM5	ENSG00000204323
Smim8	ENSMUSG00000028295	SMIM8	ENSG00000111850
Smoc1	ENSMUSG00000021136	SMOC1	ENSG00000198732
Snrpe	ENSMUSG00000090553	SNRPE	ENSG00000182004
Snx2	ENSMUSG00000034484	SNX2	ENSG00000205302
Snx5	ENSMUSG00000027423	SNX5	ENSG00000089006
Socs2	ENSMUSG00000020027	SOCS2	ENSG00000120833
Sod3	ENSMUSG00000072941	SOD3	ENSG00000109610
Sorl1	ENSMUSG00000049313	SORL1	ENSG00000137642
Sparc	ENSMUSG00000018593	SPARC	ENSG00000113140
Sra1	ENSMUSG00000006050	SRA1	ENSG00000213523
Srp19	ENSMUSG00000014504	SRP19	ENSG00000153037
Srsf1	ENSMUSG00000018379	SRSF1	ENSG00000136450
Srsf5	ENSMUSG00000021134	SRSF5	ENSG00000100650
Srsf6	ENSMUSG00000016921	SRSF6	ENSG00000124193
Ssr1	ENSMUSG00000021427	SSR1	ENSG00000124783
Ssr2	ENSMUSG00000041355	SSR2	ENSG00000163479
St3gal2	ENSMUSG00000031749	ST3GAL2	ENSG00000157350
St3gal4	ENSMUSG00000032038	ST3GAL4	ENSG00000110080
Stimate	ENSMUSG00000006526	STIMATE	ENSG00000213533
Stk17b	ENSMUSG00000026094	STK17B	ENSG00000081320
Stmp1	ENSMUSG00000073155	STMP1	ENSG00000243317	STMP1
Stum	ENSMUSG00000053963	STUM	ENSG00000203685
Sub1	ENSMUSG00000022205	SUB1	ENSG00000113387
Sulf2	ENSMUSG00000006800	SULF2	ENSG00000196562
Surf2	ENSMUSG00000014873	SURF2	ENSG00000148291
Synpo2	ENSMUSG00000050315	SYNPO2	ENSG00000172403
Taf10	ENSMUSG00000043866	TAF10	ENSG00000166337
Tagln2	ENSMUSG00000026547	TAGLN2	ENSG00000158710
Tanc2	ENSMUSG00000053580	TANC2	ENSG00000170921
Tank	ENSMUSG00000064289	TANK	ENSG00000136560
Tapbp	ENSMUSG00000024308	TAPBP	ENSG00000231925
Tcap	ENSMUSG00000007877	TCAP	ENSG00000173991
Tcea3	ENSMUSG00000001604	TCEA3	ENSG00000204219
Tceal1	ENSMUSG00000049536	TCEAL1	ENSG00000172465
Tceal3	ENSMUSG00000044550	TCEAL3	ENSG00000196507
Ten1	ENSMUSG00000020778	TEN1	ENSG00000257949
Terf2ip	ENSMUSG00000033430	TERF2IP	ENSG00000166848
Tes	ENSMUSG00000029552	TES	ENSG00000135269
Tesc	ENSMUSG00000029359	TESC	ENSG00000088992
Thbd	ENSMUSG00000074743	THBD	ENSG00000178726
Timp2	ENSMUSG00000017466	TIMP2	ENSG00000035862
Timp3	ENSMUSG00000020044	TIMP3	ENSG00000100234
Tmcc3	ENSMUSG00000020023	TMCC3	ENSG00000057704
Tmed1	ENSMUSG00000032180	TMED1	ENSG00000099203
Tmed3	ENSMUSG00000032353	TMED3	ENSG00000166557
Tmem128	ENSMUSG00000067365	TMEM128	ENSG00000132406
Tmem132a	ENSMUSG00000024736	TMEM132A	ENSG00000006118
Tmem141	ENSMUSG00000026939	TMEM141	ENSG00000244187
Tmem14c	ENSMUSG00000021361	TMEM14C	ENSG00000111843
Tmem18	ENSMUSG00000043061	TMEM18	ENSG00000151353
Tmem219	ENSMUSG00000060538	TMEM219	ENSG00000149932
Tmem230	ENSMUSG00000027341	TMEM230	ENSG00000089063
Tmem258	ENSMUSG00000036372	TMEM258	ENSG00000134825
Tmem50b	ENSMUSG00000022964	TMEM50B	ENSG00000142188
Tmem70	ENSMUSG00000025940	TMEM70	ENSG00000175606
Tmem9	ENSMUSG00000026411	TMEM9	ENSG00000116857
Tmem98	ENSMUSG00000035413	TMEM98	ENSG00000006042
Tmod1	ENSMUSG00000028328	TMOD1	ENSG00000136842
Tmx2	ENSMUSG00000050043	TMX2	ENSG00000213593
Tnxb	ENSMUSG00000033327	TNXB	ENSG00000168477
Tob2	ENSMUSG00000048546	TOB2	ENSG00000183864
Tor1aip2	ENSMUSG00000050565	TOR1AIP2	ENSG00000169905
Tpd52	ENSMUSG00000027506	TPD52	ENSG00000076554
Tpst1	ENSMUSG00000034118	TPST1	ENSG00000169902
Trappc1	ENSMUSG00000049299	TRAPPC1	ENSG00000170043
Trnau1ap	ENSMUSG00000028898	TRNAU1AP	ENSG00000180098
Trp53inp1	ENSMUSG00000028211	TP53INP1	ENSG00000164938
Tsc22d1	ENSMUSG00000022010	TSC22D1	ENSG00000102804
Tspan7	ENSMUSG00000058254	TSPAN7	ENSG00000156298
Twsg1	ENSMUSG00000024098	TWSG1	ENSG00000128791
Ube2e3	ENSMUSG00000027011	UBE2E3	ENSG00000170035
Ubl5	ENSMUSG00000084786	UBL5	ENSG00000198258
Uchl1	ENSMUSG00000029223	UCHL1	ENSG00000154277
Unc119	ENSMUSG00000002058	UNC119	ENSG00000109103
Uqcc2	ENSMUSG00000024208	UQCC2	ENSG00000137288
Uqcrq	ENSMUSG00000044894	UQCRQ	ENSG00000164405
Usp53	ENSMUSG00000039701	USP53	ENSG00000145390
Vamp3	ENSMUSG00000028955	VAMP3	ENSG00000049245
Vamp5	ENSMUSG00000073002	VAMP5	ENSG00000168899
Vcan	ENSMUSG00000021614	VCAN	ENSG00000038427
Wfs1	ENSMUSG00000039474	WFS1	ENSG00000109501
Wif1	ENSMUSG00000020218	WIF1	ENSG00000156076
Wipf1	ENSMUSG00000075284	WIPF1	ENSG00000115935
Xk	ENSMUSG00000015342	XK	ENSG00000047597
Xpnpep1	ENSMUSG00000025027	XPNPEP1	ENSG00000108039
Xpo1	ENSMUSG00000020290	XPO1	ENSG00000082898
Zbtb8os	ENSMUSG00000057572	ZBTB8OS	ENSG00000176261
Zcchc14	ENSMUSG00000061410	ZCCHC14	ENSG00000140948
Zcchc17	ENSMUSG00000028772	ZCCHC17	ENSG00000121766
Zcchc24	ENSMUSG00000055538	ZCCHC24	ENSG00000165424
Zdhhc4	ENSMUSG00000001844	ZDHHC4	ENSG00000136247
Zfp260	ENSMUSG00000049421	ZNF260	ENSG00000254004
Zfp322a	ENSMUSG00000046351	ZNF322	ENSG00000181315
Zfp414	ENSMUSG00000073423	ZNF414	ENSG00000133250
Upregulated Transcripts LDS v Control
initial_mouse_gene	initial_ensg	Human ortholog_name	ortholog_ensg
2310022B05Rik	ENSMUSG00000031983	C1orf198	ENSG00000119280
2900026A02Rik	ENSMUSG00000051339	KIAA1671	ENSG00000197077
Actn4	ENSMUSG00000054808	ACTN4	ENSG00000130402
Ak3	ENSMUSG00000024782	AK3	ENSG00000147853
Amotl2	ENSMUSG00000032531	AMOTL2	ENSG00000114019
Anln	ENSMUSG00000036777	ANLN	ENSG00000011426
Arhgdib	ENSMUSG00000030220	ARHGDIB	ENSG00000111348
Art3	ENSMUSG00000034842	ART3	ENSG00000156219
Atf3	ENSMUSG00000026628	ATF3	ENSG00000162772
Atf5	ENSMUSG00000038539	ATF5	ENSG00000169136
Atoh8	ENSMUSG00000037621	ATOH8	ENSG00000168874
Bcl2l1	ENSMUSG00000007659	BCL2L1	ENSG00000171552
Bex4	ENSMUSG00000047844	BEX4	ENSG00000102409
Bicd2	ENSMUSG00000037933	BICD2	ENSG00000185963
Brd2	ENSMUSG00000024335	BRD2	ENSG00000204256
Btg1	ENSMUSG00000036478	BTG1	ENSG00000133639
Btg2	ENSMUSG00000020423	BTG2	ENSG00000159388
C1ra	ENSMUSG00000055172	C1R	ENSG00000159403
C1s1	ENSMUSG00000038521	C1S	ENSG00000182326
Camk2g	ENSMUSG00000021820	CAMK2G	ENSG00000148660
Ccn1	ENSMUSG00000028195	CCN1	ENSG00000142871
Ccn2	ENSMUSG00000019997	CCN2	ENSG00000118523
Ccn3	ENSMUSG00000037362	CCN3	ENSG00000136999
Ccnl1	ENSMUSG00000027829	CCNL1	ENSG00000163660
Cd200	ENSMUSG00000022661	CD200	ENSG00000091972
Cdc42ep3	ENSMUSG00000036533	CDC42EP3	ENSG00000163171
Cdkn1a	ENSMUSG00000023067	CDKN1A	ENSG00000124762
Cebpb	ENSMUSG00000056501	CEBPB	ENSG00000172216
Cebpd	ENSMUSG00000071637	CEBPD	ENSG00000221869
Cggbp1	ENSMUSG00000054604	CGGBP1	ENSG00000163320
Cited2	ENSMUSG00000039910	CITED2	ENSG00000164442
Coro1c	ENSMUSG00000004530	CORO1C	ENSG00000110880
Cped1	ENSMUSG00000062980	CPED1	ENSG00000106034
Cpne8	ENSMUSG00000052560	CPNE8	ENSG00000139117
Crim1	ENSMUSG00000024074	CRIM1	ENSG00000150938
Csrnp1	ENSMUSG00000032515	CSRNP1	ENSG00000144655
Ctnna3	ENSMUSG00000060843	CTNNA3	ENSG00000183230
Ddit3	ENSMUSG00000025408	DDIT3	ENSG00000175197
Dusp1	ENSMUSG00000024190	DUSP1	ENSG00000120129
Ebf1	ENSMUSG00000057098	EBF1	ENSG00000164330
Eef2	ENSMUSG00000034994	EEF2	ENSG00000167658
Egln1	ENSMUSG00000031987	EGLN1	ENSG00000135766
Egr1	ENSMUSG00000038418	EGR1	ENSG00000120738
Ehd1	ENSMUSG00000024772	EHD1	ENSG00000110047
Eif3j1	ENSMUSG00000027236	EIF3J	ENSG00000104131
Eml2	ENSMUSG00000040811	EML2	ENSG00000125746
Endod1	ENSMUSG00000037419	ENDOD1	ENSG00000149218
Enpep	ENSMUSG00000028024	ENPEP	ENSG00000138792
Epas1	ENSMUSG00000024140	EPAS1	ENSG00000116016
Epb41	ENSMUSG00000028906	EPB41	ENSG00000159023
Esyt2	ENSMUSG00000021171	ESYT2	ENSG00000117868
Fam13c	ENSMUSG00000043259	FAM13C	ENSG00000148541
Fam241a	ENSMUSG00000050549	FAM241A	ENSG00000174749
Fez2	ENSMUSG00000056121	FEZ2	ENSG00000171055
Fhl2	ENSMUSG00000008136	FHL2	ENSG00000115641
Fmo2	ENSMUSG00000040170	FMO2	ENSG00000094963
Fos	ENSMUSG00000021250	FOS	ENSG00000170345
Fosb	ENSMUSG00000003545	FOSB	ENSG00000125740
Ftl1	ENSMUSG00000050708	FTL	ENSG00000087086
Gadd45b	ENSMUSG00000015312	GADD45B	ENSG00000099860
Gadd45g	ENSMUSG00000021453	GADD45G	ENSG00000130222
Gatad1	ENSMUSG00000007415	GATAD1	ENSG00000157259
Gcnt2	ENSMUSG00000021360	GCNT2	ENSG00000111846
Gm34030	ENSMUSG00000109697	N/A	N/A
Gne	ENSMUSG00000028479	GNE	ENSG00000159921
Golgb1	ENSMUSG00000034243	GOLGB1	ENSG00000173230
Gpc3	ENSMUSG00000055653	GPC3	ENSG00000147257
H2ax	ENSMUSG00000049932	H2AX	ENSG00000188486
H2az1	ENSMUSG00000037894	H2AZ1	ENSG00000164032
Hbegf	ENSMUSG00000024486	HBEGF	ENSG00000113070
Hes1	ENSMUSG00000022528	HES1	ENSG00000114315
Hip1	ENSMUSG00000039959	HIP1	ENSG00000127946
Hk2	ENSMUSG00000000628	HK2	ENSG00000159399
Hmgb2	ENSMUSG00000054717	HMGB2	ENSG00000164104
Hrct1	ENSMUSG00000071001	HRCT1	ENSG00000196196
Hspb1	ENSMUSG00000004951	HSPB1	ENSG00000106211
Id1	ENSMUSG00000042745	ID1	ENSG00000125968
Id2	ENSMUSG00000020644	ID2	ENSG00000115738
Id3	ENSMUSG00000007872	ID3	ENSG00000117318
Id4	ENSMUSG00000021379	ID4	ENSG00000172201
Ier2	ENSMUSG00000053560	IER2	ENSG00000160888
Ier3	ENSMUSG00000003541	IER3	ENSG00000137331
Ier5	ENSMUSG00000056708	IER5	ENSG00000162783
Ier5l	ENSMUSG00000089762	IER5L	ENSG00000188483
Ifrd1	ENSMUSG00000001627	IFRD1	ENSG00000006652
Igf1r	ENSMUSG00000005533	IGF1R	ENSG00000140443
Inafm2	ENSMUSG00000074918	INAFM2	ENSG00000259330
Irf1	ENSMUSG00000018899	IRF1	ENSG00000125347
Irf2bp2	ENSMUSG00000051495	IRF2BP2	ENSG00000168264
Jun	ENSMUSG00000052684	JUN	ENSG00000177606
Junb	ENSMUSG00000052837	JUNB	ENSG00000171223
Jund	ENSMUSG00000071076	JUND	ENSG00000130522
Kcmf1	ENSMUSG00000055239	KCMF1	ENSG00000176407
Klf15	ENSMUSG00000030087	KLF15	ENSG00000163884
Klf2	ENSMUSG00000055148	KLF2	ENSG00000127528
Klf3	ENSMUSG00000029178	KLF3	ENSG00000109787
Klf4	ENSMUSG00000003032	KLF4	ENSG00000136826
Klf6	ENSMUSG00000000078	KLF6	ENSG00000067082
Klf7	ENSMUSG00000025959	KLF7	ENSG00000118263
Klhl24	ENSMUSG00000062901	KLHL24	ENSG00000114796
Lbh	ENSMUSG00000024063	LBH	ENSG00000213626
Limd1	ENSMUSG00000025239	LIMD1	ENSG00000144791
Lmcd1	ENSMUSG00000057604	LMCD1	ENSG00000071282
Lrch1	ENSMUSG00000068015	LRCH1	ENSG00000136141
Maco1	ENSMUSG00000028826	MACO1	ENSG00000204178
Maff	ENSMUSG00000042622	MAFF	ENSG00000185022
Mafk	ENSMUSG00000018143	MAFK	ENSG00000198517
Malat1	ENSMUSG00000092341	MALAT1	ENSG00000251562
Map7d2	ENSMUSG00000041020	MAP7D2	ENSG00000184368
Mark1	ENSMUSG00000026620	MARK1	ENSG00000116141
Marveld1	ENSMUSG00000044345	MARVELD1	ENSG00000155254
Mcl1	ENSMUSG00000038612	MCL1	ENSG00000143384
Mef2c	ENSMUSG00000005583	MEF2C	ENSG00000081189
Meg3	ENSMUSG00000021268	MEG3	ENSG00000214548
Mertk	ENSMUSG00000014361	MERTK	ENSG00000153208
Mfhas1	ENSMUSG00000070056	MFHAS1	ENSG00000147324
Mob2	ENSMUSG00000025147	MOB2	ENSG00000182208
Mrps6	ENSMUSG00000039680	MRPS6	ENSG00000243927
Mt1	ENSMUSG00000031765	MT1F	ENSG00000198417
Mt2	ENSMUSG00000031762	MT2A	ENSG00000125148
Ncs1	ENSMUSG00000062661	NCS1	ENSG00000107130
Ndrg1	ENSMUSG00000005125	NDRG1	ENSG00000104419
Nexn	ENSMUSG00000039103	NEXN	ENSG00000162614
Nfkbia	ENSMUSG00000021025	NFKBIA	ENSG00000100906
Nfkbiz	ENSMUSG00000035356	NFKBIZ	ENSG00000144802
Npy1r	ENSMUSG00000036437	NPY1R	ENSG00000164128
Nr4a1	ENSMUSG00000023034	NR4A1	ENSG00000123358
Nxn	ENSMUSG00000020844	NXN	ENSG00000167693
Omd	ENSMUSG00000048368	OMD	ENSG00000127083
Osbpl9	ENSMUSG00000028559	OSBPL9	ENSG00000117859
Pacsin2	ENSMUSG00000016664	PACSIN2	ENSG00000100266
Palld	ENSMUSG00000058056	PALLD	ENSG00000129116
Pcgf5	ENSMUSG00000024805	PCGF5	ENSG00000180628
Pcp4l1	ENSMUSG00000038370	PCP4L1	ENSG00000248485
Pde4b	ENSMUSG00000028525	PDE4B	ENSG00000184588
Pdlim3	ENSMUSG00000031636	PDLIM3	ENSG00000154553
Phlda1	ENSMUSG00000020205	PHLDA1	ENSG00000139289
Phldb2	ENSMUSG00000033149	PHLDB2	ENSG00000144824
Pim1	ENSMUSG00000024014	PIM1	ENSG00000137193
Pim3	ENSMUSG00000035828	PIM3	ENSG00000198355
Pkig	ENSMUSG00000035268	PKIG	ENSG00000168734
Pln	ENSMUSG00000038583	PLN	ENSG00000198523
Plpp1	ENSMUSG00000021759	PLPP1	ENSG00000067113
Pnpla2	ENSMUSG00000025509	PNPLA2	ENSG00000177666
Pnrc1	ENSMUSG00000040128	PNRC1	ENSG00000146278
Ppp1r12c	ENSMUSG00000019254	PPP1R12C	ENSG00000125503
Ppp1r15a	ENSMUSG00000040435	PPP1R15A	ENSG00000087074
Prex2	ENSMUSG00000048960	PREX2	ENSG00000046889
Prkcd	ENSMUSG00000021948	PRKCD	ENSG00000163932
Prkg1	ENSMUSG00000052920	PRKG1	ENSG00000185532
Prss23	ENSMUSG00000039405	PRSS23	ENSG00000150687
Pth1r	ENSMUSG00000032492	PTH1R	ENSG00000160801
Pxdc1	ENSMUSG00000021411	PXDC1	ENSG00000168994
Rab3a	ENSMUSG00000031840	RAB3A	ENSG00000105649
Raly	ENSMUSG00000027593	RALY	ENSG00000125970
Rasal2	ENSMUSG00000070565	RASAL2	ENSG00000075391
Rasl11a	ENSMUSG00000029641	RASL11A	ENSG00000122035
Rftn2	ENSMUSG00000025978	RFTN2	ENSG00000162944
Rgs7bp	ENSMUSG00000021719	RGS7BP	ENSG00000186479
Rnd3	ENSMUSG00000017144	RND3	ENSG00000115963
Rock1	ENSMUSG00000024290	ROCK1	ENSG00000067900
Samd1	ENSMUSG00000079003	SAMD1	ENSG00000141858
Sbno2	ENSMUSG00000035673	SBNO2	ENSG00000064932
Sdc2	ENSMUSG00000022261	SDC2	ENSG00000169439
Septin11	ENSMUSG00000058013	SEPTIN11	ENSG00000138758
Sertad1	ENSMUSG00000008384	SERTAD1	ENSG00000197019
Sfrp1	ENSMUSG00000031548	SFRP1	ENSG00000104332
Sgk1	ENSMUSG00000019970	SGK1	ENSG00000118515
Slbp	ENSMUSG00000004642	SLBP	ENSG00000163950
Slc22a1	ENSMUSG00000023829	SLC22A1	ENSG00000175003
Slc22a3	ENSMUSG00000023828	SLC22A3	ENSG00000146477
Slc38a2	ENSMUSG00000022462	SLC38A2	ENSG00000134294
Smad6	ENSMUSG00000036867	SMAD6	ENSG00000137834
Smad7	ENSMUSG00000025880	SMAD7	ENSG00000101665
Snrk	ENSMUSG00000038145	SNRK	ENSG00000163788
Socs3	ENSMUSG00000053113	SOCS3	ENSG00000184557
Sorbs1	ENSMUSG00000025006	SORBS1	ENSG00000095637
Sorbs2	ENSMUSG00000031626	SORBS2	ENSG00000154556
Spry1	ENSMUSG00000037211	SPRY1	ENSG00000164056
Tgfb3	ENSMUSG00000021253	TGFB3	ENSG00000119699
Tln1	ENSMUSG00000028465	TLN1	ENSG00000137076
Tmem176b	ENSMUSG00000029810	TMEM176B	ENSG00000106565
Tmem38b	ENSMUSG00000028420	TMEM38B	ENSG00000095209
Tmt1a	ENSMUSG00000054619	TMT1A	ENSG00000185432
Tnnt2	ENSMUSG00000026414	TNNT2	ENSG00000118194
Tob1	ENSMUSG00000037573	TOB1	ENSG00000141232
Tpm3-rs7	ENSMUSG00000058126	N/A	N/A
Trim8	ENSMUSG00000025034	TRIM8	ENSG00000171206
Ttll7	ENSMUSG00000036745	TTLL7	ENSG00000137941
Twist1	ENSMUSG00000035799	TWIST1	ENSG00000122691
Txnip	ENSMUSG00000038393	TXNIP	ENSG00000265972
Ubald2	ENSMUSG00000050628	UBALD2	ENSG00000185262
Ubb	ENSMUSG00000019505	UBB	ENSG00000170315
Vgll3	ENSMUSG00000091243	VGLL3	ENSG00000206538
Wtip	ENSMUSG00000036459	WTIP	ENSG00000142279
Zbtb16	ENSMUSG00000066687	ZBTB16	ENSG00000109906
Zc2hc1a	ENSMUSG00000043542	ZC2HC1A	ENSG00000104427
Zfp36	ENSMUSG00000044786	ZFP36	ENSG00000128016
Zfp36l2	ENSMUSG00000045817	ZFP36L2	ENSG00000152518
Zhx3	ENSMUSG00000035877	ZHX3	ENSG00000174306

## Sheet: ClueGO Results
ID	Term	Ontology Source	Term PValue	Term PValue Corrected with Bonferroni	Group PValue	Group PValue Corrected with Bonferroni	GOLevels	GOGroups	% Associated Genes	Nr. Genes	Cluster	Genes Cluster #1	Genes Cluster #2	%Genes Cluster #1	%Genes Cluster #2	%Genes Cluster #1.adjusted.to.input.list.size	%Genes Cluster #2.adjusted.to.input.list.size	Associated Genes Found
HALLMARK_EPITHELIAL_MESENCHYMAL_TRANSITION_13	HALLMARK_EPITHELIAL_MESENCHYMAL_TRANSITION	CUSTOM_h.all.v2023.2.Hs.symbols.gmt_09.04.2024	5.84467e-35	3.35484e-32	5.84467e-35	1.69495e-33	[-1]	Group23	29	58	Specific for Cluster #1	[ABI3BP, BMP1, CALU, CD59, COL1A1, COL1A2, COL3A1, COL5A1, COL5A2, COL6A2, COL6A3, COLGALT1, CXCL12, DCN, ECM1, EFEMP2, ELN, EMP3, FBLN1, FBLN5, FBN1, FN1, FSTL1, GAS1, GJA1, GPX7, HTRA1, ITGA5, ITGB3, LAMC1, LOXL1, LRP1, LUM, MFAP5, MGP, PCOLCE2, PDGFRB, PDLIM4, PFN2, PMEPA1, PMP22, POSTN, PRRX1, RGS4, SERPINE2, SERPINH1, SGCD, SGCG, SPARC, TIMP3, VCAN, WIPF1]	[CCN1, CCN2, GADD45B, ID2, JUN, SFRP1]	89.6552	10.3448	86.6375	13.3625	[ABI3BP, BMP1, CALU, CCN1, CCN2, CD59, COL1A1, COL1A2, COL3A1, COL5A1, COL5A2, COL6A2, COL6A3, COLGALT1, CXCL12, DCN, ECM1, EFEMP2, ELN, EMP3, FBLN1, FBLN5, FBN1, FN1, FSTL1, GADD45B, GAS1, GJA1, GPX7, HTRA1, ID2, ITGA5, ITGB3, JUN, LAMC1, LOXL1, LRP1, LUM, MFAP5, MGP, PCOLCE2, PDGFRB, PDLIM4, PFN2, PMEPA1, PMP22, POSTN, PRRX1, RGS4, SERPINE2, SERPINH1, SFRP1, SGCD, SGCG, SPARC, TIMP3, VCAN, WIPF…
WP2911_188	miRNA targets in ECM and membrane receptors	CUSTOM_wikipathways-20240310-gmt-Homo-sapiens (1).gmt_09.04.2024	1.22828e-07	7.05035e-05	8.53221e-21	2.47434e-19	[-1]	Group29	28.9474	11	Specific for Cluster #1	[COL1A2, COL3A1, COL5A1, COL5A2, COL6A1, COL6A2, COL6A3, FN1, LAMC1, TNXB]	[SDC2]	90.9091	9.09091	88.2091	11.7909	[COL1A2, COL3A1, COL5A1, COL5A2, COL6A1, COL6A2, COL6A3, FN1, LAMC1, SDC2, TNXB]
WP306_195	Focal adhesion	CUSTOM_wikipathways-20240310-gmt-Homo-sapiens (1).gmt_09.04.2024	9.39489e-06	0.00539267	8.53221e-21	2.47434e-19	[-1]	Group29	11.0553	22	Specific for Cluster #1	[CAV3, COL1A1, COL1A2, COL4A6, COL5A2, COL6A2, CTNNB1, FLNC, FN1, ITGA5, ITGA9, ITGB3, LAMC1, MYLK4, PDGFRB, TNXB]	[ACTN4, IGF1R, JUN, PPP1R12C, ROCK1, TLN1]	72.7273	27.2727	66.6106	33.3894	[ACTN4, CAV3, COL1A1, COL1A2, COL4A6, COL5A2, COL6A2, CTNNB1, FLNC, FN1, IGF1R, ITGA5, ITGA9, ITGB3, JUN, LAMC1, MYLK4, PDGFRB, PPP1R12C, ROCK1, TLN1, TNXB]
WP4786_521	Type I collagen synthesis in the context of osteogenesis imperfecta	CUSTOM_wikipathways-20240310-gmt-Homo-sapiens (1).gmt_09.04.2024	2.35632e-08	1.35253e-05	8.53221e-21	2.47434e-19	[-1]	Group29	33.3333	11	Specific for Cluster #1	[ADAMTS2, BMP1, COL1A1, COL1A2, COLGALT1, CREB3L1, CRTAP, FKBP10, P4HA2, SERPINH1]	[TMEM38B]	90.9091	9.09091	88.2091	11.7909	[ADAMTS2, BMP1, COL1A1, COL1A2, COLGALT1, CREB3L1, CRTAP, FKBP10, P4HA2, SERPINH1, TMEM38B]
KEGG:04510	Focal adhesion	KEGG_09.04.2024	3.58919e-06	0.00206019	8.53221e-21	2.47434e-19	[-1]	Group29	11.3861	23	Specific for Cluster #1	[CAV3, COL1A1, COL1A2, COL4A5, COL4A6, COL6A1, COL6A2, COL6A3, CTNNB1, FN1, ITGA5, ITGA9, ITGB3, LAMC1, MYLK4, PDGFRB, TNXB]	[ACTN4, IGF1R, JUN, PPP1R12C, ROCK1, TLN1]	73.913	26.087	67.9451	32.0549	[ACTN4, CAV3, COL1A1, COL1A2, COL4A5, COL4A6, COL6A1, COL6A2, COL6A3, CTNNB1, FN1, IGF1R, ITGA5, ITGA9, ITGB3, JUN, LAMC1, MYLK4, PDGFRB, PPP1R12C, ROCK1, TLN1, TNXB]
KEGG:04820	Cytoskeleton in muscle cells	KEGG_09.04.2024	6.00036e-13	3.4442e-10	8.53221e-21	2.47434e-19	[-1]	Group29	15.7205	36	Specific for Cluster #1	[ACTG2, ATP1A2, ATP1B1, COL1A1, COL1A2, COL3A1, COL4A5, COL4A6, COL5A1, COL5A2, COL6A1, COL6A2, COL6A3, DCN, DSP, ELN, EMD, FBN1, FHL1, FLNC, FN1, ITGA5, ITGA9, ITGB3, PDLIM4, SGCD, SGCG, SYNPO2, TCAP, TMOD1, VCAN]	[FHL2, PDLIM3, SDC2, TLN1, TNNT2]	86.1111	13.8889	82.2641	17.7359	[ACTG2, ATP1A2, ATP1B1, COL1A1, COL1A2, COL3A1, COL4A5, COL4A6, COL5A1, COL5A2, COL6A1, COL6A2, COL6A3, DCN, DSP, ELN, EMD, FBN1, FHL1, FHL2, FLNC, FN1, ITGA5, ITGA9, ITGB3, PDLIM3, PDLIM4, SDC2, SGCD, SGCG, SYNPO2, TCAP, TLN1, TMOD1, TNNT2, VCAN]
KEGG:04974	Protein digestion and absorption	KEGG_09.04.2024	2.02424e-06	0.00116191	8.53221e-21	2.47434e-19	[-1]	Group29	15.534	16	Specific for Cluster #1	[ATP1A2, ATP1B1, COL14A1, COL15A1, COL1A1, COL1A2, COL3A1, COL4A5, COL4A6, COL5A1, COL5A2, COL6A1, COL6A2, COL6A3, ELN]	[SLC38A2]	93.75	6.25	91.8178	8.18219	[ATP1A2, ATP1B1, COL14A1, COL15A1, COL1A1, COL1A2, COL3A1, COL4A5, COL4A6, COL5A1, COL5A2, COL6A1, COL6A2, COL6A3, ELN, SLC38A2]
R-HSA:1442490	Collagen degradation	REACTOME_Pathways_09.04.2024	1.15388e-07	6.62325e-05	8.53221e-21	2.47434e-19	[-1]	Group29	21.875	14	Specific for Cluster #1	[ADAM10, COL14A1, COL15A1, COL1A1, COL1A2, COL3A1, COL4A5, COL4A6, COL5A1, COL5A2, COL6A1, COL6A2, COL6A3, CTSB]	[]	100	0	100	0	[ADAM10, COL14A1, COL15A1, COL1A1, COL1A2, COL3A1, COL4A5, COL4A6, COL5A1, COL5A2, COL6A1, COL6A2, COL6A3, CTSB]
R-HSA:1474228	Degradation of the extracellular matrix	REACTOME_Pathways_09.04.2024	1.34197e-10	7.70289e-08	8.53221e-21	2.47434e-19	[-1]	Group29	17.8571	25	Specific for Cluster #1	[ADAM10, ADAM15, BMP1, COL14A1, COL15A1, COL1A1, COL1A2, COL3A1, COL4A5, COL4A6, COL5A1, COL5A2, COL6A1, COL6A2, COL6A3, CTSB, DCN, ELN, FBN1, FN1, HTRA1, LAMC1, MMP17, OPTC, TIMP2]	[]	100	0	100	0	[ADAM10, ADAM15, BMP1, COL14A1, COL15A1, COL1A1, COL1A2, COL3A1, COL4A5, COL4A6, COL5A1, COL5A2, COL6A1, COL6A2, COL6A3, CTSB, DCN, ELN, FBN1, FN1, HTRA1, LAMC1, MMP17, OPTC, TIMP2]
R-HSA:1474244	Extracellular matrix organization	REACTOME_Pathways_09.04.2024	1.16954e-21	6.71318e-19	8.53221e-21	2.47434e-19	[-1]	Group29	18	54	Specific for Cluster #1	[ADAM10, ADAM15, ADAMTS2, BMP1, COL14A1, COL15A1, COL1A1, COL1A2, COL3A1, COL4A5, COL4A6, COL5A1, COL5A2, COL6A1, COL6A2, COL6A3, COLGALT1, CRTAP, CTSB, DCN, DDR2, EFEMP2, ELN, FBLN1, FBLN5, FBN1, FN1, HTRA1, ITGA5, ITGA9, ITGB3, LAMC1, LOXL1, LOXL3, LTBP1, LTBP3, LUM, MFAP4, MFAP5, MMP17, NCAM1, OPTC, P3H3, P4HA2, PCOLCE2, PTPRS, SERPINH1, SH3PXD2A, SPARC, TIMP2, TNXB, VCAN]	[SDC2, TGFB3]	96.2963	3.7037	95.1102	4.88977	[ADAM10, ADAM15, ADAMTS2, BMP1, COL14A1, COL15A1, COL1A1, COL1A2, COL3A1, COL4A5, COL4A6, COL5A1, COL5A2, COL6A1, COL6A2, COL6A3, COLGALT1, CRTAP, CTSB, DCN, DDR2, EFEMP2, ELN, FBLN1, FBLN5, FBN1, FN1, HTRA1, ITGA5, ITGA9, ITGB3, LAMC1, LOXL1, LOXL3, LTBP1, LTBP3, LUM, MFAP4, MFAP5, MMP17, NCAM1, OPTC, P3H3, P4HA2, PCOLCE2, PTPRS, SDC2, SERPINH1, SH3PXD2A, SPARC, TGFB3, TIMP2, TNXB, VCAN]
R-HSA:1474290	Collagen formation	REACTOME_Pathways_09.04.2024	2.94826e-13	1.6923e-10	8.53221e-21	2.47434e-19	[-1]	Group29	25.5556	23	Specific for Cluster #1	[ADAMTS2, BMP1, COL14A1, COL15A1, COL1A1, COL1A2, COL3A1, COL4A5, COL4A6, COL5A1, COL5A2, COL6A1, COL6A2, COL6A3, COLGALT1, CRTAP, CTSB, LOXL1, LOXL3, P3H3, P4HA2, PCOLCE2, SERPINH1]	[]	100	0	100	0	[ADAMTS2, BMP1, COL14A1, COL15A1, COL1A1, COL1A2, COL3A1, COL4A5, COL4A6, COL5A1, COL5A2, COL6A1, COL6A2, COL6A3, COLGALT1, CRTAP, CTSB, LOXL1, LOXL3, P3H3, P4HA2, PCOLCE2, SERPINH1]
R-HSA:1650814	Collagen biosynthesis and modifying enzymes	REACTOME_Pathways_09.04.2024	4.31989e-13	2.47962e-10	8.53221e-21	2.47434e-19	[-1]	Group29	29.8507	20	Specific for Cluster #1	[ADAMTS2, BMP1, COL14A1, COL15A1, COL1A1, COL1A2, COL3A1, COL4A5, COL4A6, COL5A1, COL5A2, COL6A1, COL6A2, COL6A3, COLGALT1, CRTAP, P3H3, P4HA2, PCOLCE2, SERPINH1]	[]	100	0	100	0	[ADAMTS2, BMP1, COL14A1, COL15A1, COL1A1, COL1A2, COL3A1, COL4A5, COL4A6, COL5A1, COL5A2, COL6A1, COL6A2, COL6A3, COLGALT1, CRTAP, P3H3, P4HA2, PCOLCE2, SERPINH1]
R-HSA:2022090	Assembly of collagen fibrils and other multimeric structures	REACTOME_Pathways_09.04.2024	8.25075e-10	4.73593e-07	8.53221e-21	2.47434e-19	[-1]	Group29	26.2295	16	Specific for Cluster #1	[BMP1, COL14A1, COL15A1, COL1A1, COL1A2, COL3A1, COL4A5, COL4A6, COL5A1, COL5A2, COL6A1, COL6A2, COL6A3, CTSB, LOXL1, LOXL3]	[]	100	0	100	0	[BMP1, COL14A1, COL15A1, COL1A1, COL1A2, COL3A1, COL4A5, COL4A6, COL5A1, COL5A2, COL6A1, COL6A2, COL6A3, CTSB, LOXL1, LOXL3]
R-HSA:216083	Integrin cell surface interactions	REACTOME_Pathways_09.04.2024	1.35192e-07	7.76003e-05	8.53221e-21	2.47434e-19	[-1]	Group29	18.8235	16	Specific for Cluster #1	[COL1A1, COL1A2, COL3A1, COL4A5, COL4A6, COL5A1, COL5A2, COL6A1, COL6A2, COL6A3, FBN1, FN1, ITGA5, ITGA9, ITGB3, LUM]	[]	100	0	100	0	[COL1A1, COL1A2, COL3A1, COL4A5, COL4A6, COL5A1, COL5A2, COL6A1, COL6A2, COL6A3, FBN1, FN1, ITGA5, ITGA9, ITGB3, LUM]
R-HSA:2243919	Crosslinking of collagen fibrils	REACTOME_Pathways_09.04.2024	2.74432e-06	0.00157524	8.53221e-21	2.47434e-19	[-1]	Group29	38.8889	7	Specific for Cluster #1	[BMP1, COL1A1, COL1A2, COL4A5, COL4A6, LOXL1, LOXL3]	[]	100	0	100	0	[BMP1, COL1A1, COL1A2, COL4A5, COL4A6, LOXL1, LOXL3]
R-HSA:3000170	Syndecan interactions	REACTOME_Pathways_09.04.2024	5.53174e-06	0.00317522	8.53221e-21	2.47434e-19	[-1]	Group29	29.6296	8	Specific for Cluster #1	[COL1A1, COL1A2, COL3A1, COL5A1, COL5A2, FN1, ITGB3]	[SDC2]	87.5	12.5	83.9661	16.0339	[COL1A1, COL1A2, COL3A1, COL5A1, COL5A2, FN1, ITGB3, SDC2]
R-HSA:3000171	Non-integrin membrane-ECM interactions	REACTOME_Pathways_09.04.2024	2.12615e-06	0.00122041	8.53221e-21	2.47434e-19	[-1]	Group29	20.339	12	Specific for Cluster #1	[COL1A1, COL1A2, COL3A1, COL4A5, COL4A6, COL5A1, COL5A2, DDR2, FN1, ITGB3, LAMC1]	[SDC2]	91.6667	8.33333	89.1648	10.8352	[COL1A1, COL1A2, COL3A1, COL4A5, COL4A6, COL5A1, COL5A2, DDR2, FN1, ITGB3, LAMC1, SDC2]
R-HSA:3000178	ECM proteoglycans	REACTOME_Pathways_09.04.2024	5.85167e-14	3.35886e-11	8.53221e-21	2.47434e-19	[-1]	Group29	28.9474	22	Specific for Cluster #1	[COL1A1, COL1A2, COL3A1, COL4A5, COL4A6, COL5A1, COL5A2, COL6A1, COL6A2, COL6A3, DCN, FN1, ITGA9, ITGB3, LAMC1, LUM, NCAM1, PTPRS, SPARC, TNXB, VCAN]	[TGFB3]	95.4545	4.54545	94.0157	5.98432	[COL1A1, COL1A2, COL3A1, COL4A5, COL4A6, COL5A1, COL5A2, COL6A1, COL6A2, COL6A3, DCN, FN1, ITGA9, ITGB3, LAMC1, LUM, NCAM1, PTPRS, SPARC, TGFB3, TNXB, VCAN]
R-HSA:8948216	Collagen chain trimerization	REACTOME_Pathways_09.04.2024	6.8095e-08	3.90865e-05	8.53221e-21	2.47434e-19	[-1]	Group29	27.2727	12	Specific for Cluster #1	[COL14A1, COL15A1, COL1A1, COL1A2, COL3A1, COL4A5, COL4A6, COL5A1, COL5A2, COL6A1, COL6A2, COL6A3]	[]	100	0	100	0	[COL14A1, COL15A1, COL1A1, COL1A2, COL3A1, COL4A5, COL4A6, COL5A1, COL5A2, COL6A1, COL6A2, COL6A3]
bioplanet_1110	Extracellular matrix organization	CUSTOM_BioPlanet-pathway.txt.txt_09.04.2024	4.15931e-11	2.38745e-08	8.53221e-21	2.47434e-19	[-1]	Group29	22.5806	21	Specific for Cluster #1	[ADAMTS2, BMP1, COL14A1, COL15A1, COL1A1, COL1A2, COL3A1, COL4A5, COL4A6, COL5A1, COL5A2, COL6A1, COL6A2, COL6A3, COLGALT1, CRTAP, MMP17, P3H3, PCOLCE2, SERPINH1, TIMP2]	[]	100	0	100	0	[ADAMTS2, BMP1, COL14A1, COL15A1, COL1A1, COL1A2, COL3A1, COL4A5, COL4A6, COL5A1, COL5A2, COL6A1, COL6A2, COL6A3, COLGALT1, CRTAP, MMP17, P3H3, PCOLCE2, SERPINH1, TIMP2]
bioplanet_1295	Beta-1 integrin cell surface interactions	CUSTOM_BioPlanet-pathway.txt.txt_09.04.2024	2.90763e-09	1.66898e-06	8.53221e-21	2.47434e-19	[-1]	Group29	24.2424	16	Specific for Cluster #1	[COL1A1, COL1A2, COL3A1, COL4A5, COL4A6, COL5A1, COL5A2, COL6A1, COL6A2, COL6A3, FBN1, FN1, IGSF8, ITGA5, ITGA9, LAMC1]	[]	100	0	100	0	[COL1A1, COL1A2, COL3A1, COL4A5, COL4A6, COL5A1, COL5A2, COL6A1, COL6A2, COL6A3, FBN1, FN1, IGSF8, ITGA5, ITGA9, LAMC1]
bioplanet_1303	Beta-3 integrin cell surface interactions	CUSTOM_BioPlanet-pathway.txt.txt_09.04.2024	4.20154e-06	0.00241168	8.53221e-21	2.47434e-19	[-1]	Group29	23.2558	10	Specific for Cluster #1	[COL1A1, COL1A2, COL4A5, COL4A6, FBN1, FN1, ITGB3, LAMC1, PDGFRB]	[CCN1]	90	10	87.0684	12.9316	[CCN1, COL1A1, COL1A2, COL4A5, COL4A6, FBN1, FN1, ITGB3, LAMC1, PDGFRB]
bioplanet_1337	Integrins in angiogenesis	CUSTOM_BioPlanet-pathway.txt.txt_09.04.2024	2.27348e-09	1.30498e-06	8.53221e-21	2.47434e-19	[-1]	Group29	22.973	17	Specific for Cluster #1	[COL14A1, COL15A1, COL1A1, COL1A2, COL3A1, COL4A5, COL4A6, COL5A1, COL5A2, COL6A1, COL6A2, COL6A3, FN1, ITGB3]	[IGF1R, ROCK1, TLN1]	82.3529	17.6471	77.7342	22.2658	[COL14A1, COL15A1, COL1A1, COL1A2, COL3A1, COL4A5, COL4A6, COL5A1, COL5A2, COL6A1, COL6A2, COL6A3, FN1, IGF1R, ITGB3, ROCK1, TLN1]
bioplanet_1352	Syndecan 1 pathway	CUSTOM_BioPlanet-pathway.txt.txt_09.04.2024	1.17038e-07	6.71797e-05	8.53221e-21	2.47434e-19	[-1]	Group29	26.087	12	Specific for Cluster #1	[COL14A1, COL15A1, COL1A1, COL1A2, COL3A1, COL4A5, COL4A6, COL5A1, COL5A2, COL6A1, COL6A2, COL6A3]	[]	100	0	100	0	[COL14A1, COL15A1, COL1A1, COL1A2, COL3A1, COL4A5, COL4A6, COL5A1, COL5A2, COL6A1, COL6A2, COL6A3]
bioplanet_197	Focal adhesion	CUSTOM_BioPlanet-pathway.txt.txt_09.04.2024	4.02099e-06	0.00230805	8.53221e-21	2.47434e-19	[-1]	Group29	10.7296	25	Specific for Cluster #1	[ARAF, CAV3, COL1A1, COL1A2, COL3A1, COL4A6, COL5A1, COL5A2, COL6A1, COL6A2, COL6A3, CTNNB1, FLNC, FN1, ITGA5, ITGA9, ITGB3, LAMC1, PDGFRB, TNXB]	[ACTN4, IGF1R, JUN, ROCK1, TLN1]	80	20	74.9527	25.0473	[ACTN4, ARAF, CAV3, COL1A1, COL1A2, COL3A1, COL4A6, COL5A1, COL5A2, COL6A1, COL6A2, COL6A3, CTNNB1, FLNC, FN1, IGF1R, ITGA5, ITGA9, ITGB3, JUN, LAMC1, PDGFRB, ROCK1, TLN1, TNXB]
bioplanet_237	ECM-receptor interaction	CUSTOM_BioPlanet-pathway.txt.txt_09.04.2024	1.13753e-07	6.5294e-05	8.53221e-21	2.47434e-19	[-1]	Group29	19.0476	16	Specific for Cluster #1	[COL1A1, COL1A2, COL3A1, COL4A6, COL5A1, COL5A2, COL6A1, COL6A2, COL6A3, FN1, ITGA5, ITGA9, ITGB3, LAMC1, TNXB]	[SDC2]	93.75	6.25	91.8178	8.18219	[COL1A1, COL1A2, COL3A1, COL4A6, COL5A1, COL5A2, COL6A1, COL6A2, COL6A3, FN1, ITGA5, ITGA9, ITGB3, LAMC1, SDC2, TNXB]
bioplanet_769	Collagen biosynthesis and modifying enzymes	CUSTOM_BioPlanet-pathway.txt.txt_09.04.2024	1.86833e-12	1.07242e-09	8.53221e-21	2.47434e-19	[-1]	Group29	29.6875	19	Specific for Cluster #1	[ADAMTS2, BMP1, COL14A1, COL15A1, COL1A1, COL1A2, COL3A1, COL4A5, COL4A6, COL5A1, COL5A2, COL6A1, COL6A2, COL6A3, COLGALT1, CRTAP, P3H3, PCOLCE2, SERPINH1]	[]	100	0	100	0	[ADAMTS2, BMP1, COL14A1, COL15A1, COL1A1, COL1A2, COL3A1, COL4A5, COL4A6, COL5A1, COL5A2, COL6A1, COL6A2, COL6A3, COLGALT1, CRTAP, P3H3, PCOLCE2, SERPINH1]
bioplanet_900	NCAM1 interactions	CUSTOM_BioPlanet-pathway.txt.txt_09.04.2024	6.33764e-07	0.00036378	8.53221e-21	2.47434e-19	[-1]	Group29	25	11	Specific for Cluster #1	[COL1A1, COL1A2, COL3A1, COL4A5, COL5A1, COL5A2, COL6A1, COL6A2, COL6A3, NCAM1, PRNP]	[]	100	0	100	0	[COL1A1, COL1A2, COL3A1, COL4A5, COL5A1, COL5A2, COL6A1, COL6A2, COL6A3, NCAM1, PRNP]
bioplanet_1443	BDNF signaling pathway	CUSTOM_BioPlanet-pathway.txt.txt_09.04.2024	9.19823e-20	5.27979e-17	9.19823e-20	2.66749e-18	[-1]	Group12	18.3908	48	None Specific Cluster	[ADM, CXCL12, DDX17, EMP3, FBN1, FLNC, HSPA1A, HSPA1B, HYOU1, INSIG1, MGP, MYC, MYDGF, NQO1, NUCB2, P4HA2, PDLIM4, RAMP1, S100A10, SERPINH1, SRSF5, SSR1, TMOD1, VCAN]	[ATF3, BTG1, BTG2, CD200, CDKN1A, DDIT3, DUSP1, EGR1, FHL2, FOS, FOSB, HSPB1, ID2, IER2, JUN, JUNB, KLF6, MAFF, NR4A1, PDE4B, PDLIM3, RND3, TXNIP, ZFP36]	50	50	42.7954	57.2046	[ADM, ATF3, BTG1, BTG2, CD200, CDKN1A, CXCL12, DDIT3, DDX17, DUSP1, EGR1, EMP3, FBN1, FHL2, FLNC, FOS, FOSB, HSPA1A, HSPA1B, HSPB1, HYOU1, ID2, IER2, INSIG1, JUN, JUNB, KLF6, MAFF, MGP, MYC, MYDGF, NQO1, NR4A1, NUCB2, P4HA2, PDE4B, PDLIM3, PDLIM4, RAMP1, RND3, S100A10, SERPINH1, SRSF5, SSR1, TMOD1, TXNIP, VCAN, ZFP36]
HALLMARK_HYPOXIA_21	HALLMARK_HYPOXIA	CUSTOM_h.all.v2023.2.Hs.symbols.gmt_09.04.2024	1.13634e-19	6.52257e-17	1.13634e-19	3.29537e-18	[-1]	Group02	21	42	Specific for Cluster #2	[ADM, ANXA2, CCN5, COL5A1, DCN, FAM162A, GAA, GLRX, HEXA, KDELR3, P4HA2, PAM, RBPJ, TES, TPD52, XPNPEP1]	[ATF3, BTG1, CCN1, CCN2, CDKN1A, CITED2, DDIT3, DUSP1, FOS, GCNT2, GPC3, HK2, IER3, JUN, KLF6, KLF7, KLHL24, MAFF, MT2A, NDRG1, PIM1, PNRC1, PPP1R15A, SDC2, TGFB3, ZFP36]	38.0952	61.9048	31.5245	68.4755	[ADM, ANXA2, ATF3, BTG1, CCN1, CCN2, CCN5, CDKN1A, CITED2, COL5A1, DCN, DDIT3, DUSP1, FAM162A, FOS, GAA, GCNT2, GLRX, GPC3, HEXA, HK2, IER3, JUN, KDELR3, KLF6, KLF7, KLHL24, MAFF, MT2A, NDRG1, P4HA2, PAM, PIM1, PNRC1, PPP1R15A, RBPJ, SDC2, TES, TGFB3, TPD52, XPNPEP1, ZFP36]
HALLMARK_TNFA_SIGNALING_VIA_NFKB_44	HALLMARK_TNFA_SIGNALING_VIA_NFKB	CUSTOM_h.all.v2023.2.Hs.symbols.gmt_09.04.2024	1.13634e-19	6.52257e-17	1.13634e-19	3.29537e-18	[-1]	Group18	21	42	Specific for Cluster #2	[B4GALT1, MYC, PMEPA1, TANK, TSC22D1]	[ATF3, BTG1, BTG2, CCN1, CCNL1, CDKN1A, CEBPB, CEBPD, DUSP1, EGR1, EHD1, FOS, FOSB, GADD45B, HBEGF, HES1, ID2, IER2, IER3, IER5, IRF1, JUN, JUNB, KLF2, KLF4, KLF6, MAFF, MCL1, NFKBIA, NR4A1, PDE4B, PHLDA1, PNRC1, PPP1R15A, SGK1, SOCS3, ZFP36]	11.9048	88.0952	9.1814	90.8186	[ATF3, B4GALT1, BTG1, BTG2, CCN1, CCNL1, CDKN1A, CEBPB, CEBPD, DUSP1, EGR1, EHD1, FOS, FOSB, GADD45B, HBEGF, HES1, ID2, IER2, IER3, IER5, IRF1, JUN, JUNB, KLF2, KLF4, KLF6, MAFF, MCL1, MYC, NFKBIA, NR4A1, PDE4B, PHLDA1, PMEPA1, PNRC1, PPP1R15A, SGK1, SOCS3, TANK, TSC22D1, ZFP36]
bioplanet_1442	TGF-beta regulation of extracellular matrix	CUSTOM_BioPlanet-pathway.txt.txt_09.04.2024	9.27294e-13	5.32267e-10	9.27294e-13	2.68915e-11	[-1]	Group11	10.6195	60	Specific for Cluster #1	[ABCC9, ATP1B1, CCN5, COL15A1, COL1A1, COL1A2, CTSC, ELN, F2R, FBLN1, FBLN5, FBN1, FN1, GAS1, GSTM3, HEBP1, HEYL, HMGCS1, IDI1, INSIG1, LAMC1, LUM, MFAP5, MGST1, MORF4L2, MYC, PDE1A, PDGFRL, POSTN, QPCT, RGS4, RGS5, S100A10, SC5D, SELENOP, SOD3, SSR1, STK17B, TIMP3, UCHL1, VCAN]	[ATF3, BCL2L1, BRD2, C1R, C1S, CCN1, CCN2, CEBPD, CITED2, FMO2, ID2, ID4, JUNB, PIM1, PLN, SFRP1, SMAD7, SPRY1, TOB1]	68.3333	31.6667	61.7495	38.2505	[ABCC9, ATF3, ATP1B1, BCL2L1, BRD2, C1R, C1S, CCN1, CCN2, CCN5, CEBPD, CITED2, COL15A1, COL1A1, COL1A2, CTSC, ELN, F2R, FBLN1, FBLN5, FBN1, FMO2, FN1, GAS1, GSTM3, HEBP1, HEYL, HMGCS1, ID2, ID4, IDI1, INSIG1, JUNB, LAMC1, LUM, MFAP5, MGST1, MORF4L2, MYC, PDE1A, PDGFRL, PIM1, PLN, POSTN, QPCT, RGS4, RGS5, S100A10, SC5D, SELENOP, SFRP1, SMAD7, SOD3, SPRY1, SSR1, STK17B, TIMP3, TOB1, UCHL1, VCAN]
WP306_195	Focal adhesion	CUSTOM_wikipathways-20240310-gmt-Homo-sapiens (1).gmt_09.04.2024	9.39489e-06	0.00539267	3.8146e-12	1.10623e-10	[-1]	Group28	11.0553	22	Specific for Cluster #1	[CAV3, COL1A1, COL1A2, COL4A6, COL5A2, COL6A2, CTNNB1, FLNC, FN1, ITGA5, ITGA9, ITGB3, LAMC1, MYLK4, PDGFRB, TNXB]	[ACTN4, IGF1R, JUN, PPP1R12C, ROCK1, TLN1]	72.7273	27.2727	66.6106	33.3894	[ACTN4, CAV3, COL1A1, COL1A2, COL4A6, COL5A2, COL6A2, CTNNB1, FLNC, FN1, IGF1R, ITGA5, ITGA9, ITGB3, JUN, LAMC1, MYLK4, PDGFRB, PPP1R12C, ROCK1, TLN1, TNXB]
KEGG:04510	Focal adhesion	KEGG_09.04.2024	3.58919e-06	0.00206019	3.8146e-12	1.10623e-10	[-1]	Group28	11.3861	23	Specific for Cluster #1	[CAV3, COL1A1, COL1A2, COL4A5, COL4A6, COL6A1, COL6A2, COL6A3, CTNNB1, FN1, ITGA5, ITGA9, ITGB3, LAMC1, MYLK4, PDGFRB, TNXB]	[ACTN4, IGF1R, JUN, PPP1R12C, ROCK1, TLN1]	73.913	26.087	67.9451	32.0549	[ACTN4, CAV3, COL1A1, COL1A2, COL4A5, COL4A6, COL6A1, COL6A2, COL6A3, CTNNB1, FN1, IGF1R, ITGA5, ITGA9, ITGB3, JUN, LAMC1, MYLK4, PDGFRB, PPP1R12C, ROCK1, TLN1, TNXB]
KEGG:05205	Proteoglycans in cancer	KEGG_09.04.2024	3.90408e-06	0.00224094	3.8146e-12	1.10623e-10	[-1]	Group28	11.33	23	None Specific Cluster	[ARAF, CAV3, COL1A1, COL1A2, CTNNB1, DCN, FN1, FZD2, HIF1A, ITGA5, ITGB3, LUM, MYC, TIMP3]	[CAMK2G, CDKN1A, GPC3, HBEGF, IGF1R, PPP1R12C, ROCK1, SDC2, TWIST1]	60.8696	39.1304	53.7835	46.2165	[ARAF, CAMK2G, CAV3, CDKN1A, COL1A1, COL1A2, CTNNB1, DCN, FN1, FZD2, GPC3, HBEGF, HIF1A, IGF1R, ITGA5, ITGB3, LUM, MYC, PPP1R12C, ROCK1, SDC2, TIMP3, TWIST1]
R-HSA:216083	Integrin cell surface interactions	REACTOME_Pathways_09.04.2024	1.35192e-07	7.76003e-05	3.8146e-12	1.10623e-10	[-1]	Group28	18.8235	16	Specific for Cluster #1	[COL1A1, COL1A2, COL3A1, COL4A5, COL4A6, COL5A1, COL5A2, COL6A1, COL6A2, COL6A3, FBN1, FN1, ITGA5, ITGA9, ITGB3, LUM]	[]	100	0	100	0	[COL1A1, COL1A2, COL3A1, COL4A5, COL4A6, COL5A1, COL5A2, COL6A1, COL6A2, COL6A3, FBN1, FN1, ITGA5, ITGA9, ITGB3, LUM]
R-HSA:2243919	Crosslinking of collagen fibrils	REACTOME_Pathways_09.04.2024	2.74432e-06	0.00157524	3.8146e-12	1.10623e-10	[-1]	Group28	38.8889	7	Specific for Cluster #1	[BMP1, COL1A1, COL1A2, COL4A5, COL4A6, LOXL1, LOXL3]	[]	100	0	100	0	[BMP1, COL1A1, COL1A2, COL4A5, COL4A6, LOXL1, LOXL3]
R-HSA:3000170	Syndecan interactions	REACTOME_Pathways_09.04.2024	5.53174e-06	0.00317522	3.8146e-12	1.10623e-10	[-1]	Group28	29.6296	8	Specific for Cluster #1	[COL1A1, COL1A2, COL3A1, COL5A1, COL5A2, FN1, ITGB3]	[SDC2]	87.5	12.5	83.9661	16.0339	[COL1A1, COL1A2, COL3A1, COL5A1, COL5A2, FN1, ITGB3, SDC2]
R-HSA:3000171	Non-integrin membrane-ECM interactions	REACTOME_Pathways_09.04.2024	2.12615e-06	0.00122041	3.8146e-12	1.10623e-10	[-1]	Group28	20.339	12	Specific for Cluster #1	[COL1A1, COL1A2, COL3A1, COL4A5, COL4A6, COL5A1, COL5A2, DDR2, FN1, ITGB3, LAMC1]	[SDC2]	91.6667	8.33333	89.1648	10.8352	[COL1A1, COL1A2, COL3A1, COL4A5, COL4A6, COL5A1, COL5A2, DDR2, FN1, ITGB3, LAMC1, SDC2]
R-HSA:3000178	ECM proteoglycans	REACTOME_Pathways_09.04.2024	5.85167e-14	3.35886e-11	3.8146e-12	1.10623e-10	[-1]	Group28	28.9474	22	Specific for Cluster #1	[COL1A1, COL1A2, COL3A1, COL4A5, COL4A6, COL5A1, COL5A2, COL6A1, COL6A2, COL6A3, DCN, FN1, ITGA9, ITGB3, LAMC1, LUM, NCAM1, PTPRS, SPARC, TNXB, VCAN]	[TGFB3]	95.4545	4.54545	94.0157	5.98432	[COL1A1, COL1A2, COL3A1, COL4A5, COL4A6, COL5A1, COL5A2, COL6A1, COL6A2, COL6A3, DCN, FN1, ITGA9, ITGB3, LAMC1, LUM, NCAM1, PTPRS, SPARC, TGFB3, TNXB, VCAN]
bioplanet_1295	Beta-1 integrin cell surface interactions	CUSTOM_BioPlanet-pathway.txt.txt_09.04.2024	2.90763e-09	1.66898e-06	3.8146e-12	1.10623e-10	[-1]	Group28	24.2424	16	Specific for Cluster #1	[COL1A1, COL1A2, COL3A1, COL4A5, COL4A6, COL5A1, COL5A2, COL6A1, COL6A2, COL6A3, FBN1, FN1, IGSF8, ITGA5, ITGA9, LAMC1]	[]	100	0	100	0	[COL1A1, COL1A2, COL3A1, COL4A5, COL4A6, COL5A1, COL5A2, COL6A1, COL6A2, COL6A3, FBN1, FN1, IGSF8, ITGA5, ITGA9, LAMC1]
bioplanet_1303	Beta-3 integrin cell surface interactions	CUSTOM_BioPlanet-pathway.txt.txt_09.04.2024	4.20154e-06	0.00241168	3.8146e-12	1.10623e-10	[-1]	Group28	23.2558	10	Specific for Cluster #1	[COL1A1, COL1A2, COL4A5, COL4A6, FBN1, FN1, ITGB3, LAMC1, PDGFRB]	[CCN1]	90	10	87.0684	12.9316	[CCN1, COL1A1, COL1A2, COL4A5, COL4A6, FBN1, FN1, ITGB3, LAMC1, PDGFRB]
bioplanet_1337	Integrins in angiogenesis	CUSTOM_BioPlanet-pathway.txt.txt_09.04.2024	2.27348e-09	1.30498e-06	3.8146e-12	1.10623e-10	[-1]	Group28	22.973	17	Specific for Cluster #1	[COL14A1, COL15A1, COL1A1, COL1A2, COL3A1, COL4A5, COL4A6, COL5A1, COL5A2, COL6A1, COL6A2, COL6A3, FN1, ITGB3]	[IGF1R, ROCK1, TLN1]	82.3529	17.6471	77.7342	22.2658	[COL14A1, COL15A1, COL1A1, COL1A2, COL3A1, COL4A5, COL4A6, COL5A1, COL5A2, COL6A1, COL6A2, COL6A3, FN1, IGF1R, ITGB3, ROCK1, TLN1]
bioplanet_197	Focal adhesion	CUSTOM_BioPlanet-pathway.txt.txt_09.04.2024	4.02099e-06	0.00230805	3.8146e-12	1.10623e-10	[-1]	Group28	10.7296	25	Specific for Cluster #1	[ARAF, CAV3, COL1A1, COL1A2, COL3A1, COL4A6, COL5A1, COL5A2, COL6A1, COL6A2, COL6A3, CTNNB1, FLNC, FN1, ITGA5, ITGA9, ITGB3, LAMC1, PDGFRB, TNXB]	[ACTN4, IGF1R, JUN, ROCK1, TLN1]	80	20	74.9527	25.0473	[ACTN4, ARAF, CAV3, COL1A1, COL1A2, COL3A1, COL4A6, COL5A1, COL5A2, COL6A1, COL6A2, COL6A3, CTNNB1, FLNC, FN1, IGF1R, ITGA5, ITGA9, ITGB3, JUN, LAMC1, PDGFRB, ROCK1, TLN1, TNXB]
bioplanet_237	ECM-receptor interaction	CUSTOM_BioPlanet-pathway.txt.txt_09.04.2024	1.13753e-07	6.5294e-05	3.8146e-12	1.10623e-10	[-1]	Group28	19.0476	16	Specific for Cluster #1	[COL1A1, COL1A2, COL3A1, COL4A6, COL5A1, COL5A2, COL6A1, COL6A2, COL6A3, FN1, ITGA5, ITGA9, ITGB3, LAMC1, TNXB]	[SDC2]	93.75	6.25	91.8178	8.18219	[COL1A1, COL1A2, COL3A1, COL4A6, COL5A1, COL5A2, COL6A1, COL6A2, COL6A3, FN1, ITGA5, ITGA9, ITGB3, LAMC1, SDC2, TNXB]
R-HSA:1566948	Elastic fibre formation	REACTOME_Pathways_09.04.2024	4.42176e-11	2.53809e-08	4.48038e-12	1.29931e-10	[-1]	Group26	34.0909	15	Specific for Cluster #1	[EFEMP2, ELN, FBLN1, FBLN5, FBN1, FN1, ITGA5, ITGB3, LOXL1, LOXL3, LTBP1, LTBP3, MFAP4, MFAP5]	[TGFB3]	93.3333	6.66667	91.2843	8.7157	[EFEMP2, ELN, FBLN1, FBLN5, FBN1, FN1, ITGA5, ITGB3, LOXL1, LOXL3, LTBP1, LTBP3, MFAP4, MFAP5, TGFB3]
R-HSA:2129379	Molecules associated with elastic fibres	REACTOME_Pathways_09.04.2024	7.66574e-09	4.40013e-06	4.48038e-12	1.29931e-10	[-1]	Group26	32.4324	12	Specific for Cluster #1	[EFEMP2, ELN, FBLN1, FBLN5, FBN1, FN1, ITGB3, LTBP1, LTBP3, MFAP4, MFAP5]	[TGFB3]	91.6667	8.33333	89.1648	10.8352	[EFEMP2, ELN, FBLN1, FBLN5, FBN1, FN1, ITGB3, LTBP1, LTBP3, MFAP4, MFAP5, TGFB3]
R-HSA:2173789	TGF-beta receptor signaling activates SMADs	REACTOME_Pathways_09.04.2024	9.86976e-06	0.00566524	4.48038e-12	1.29931e-10	[-1]	Group26	21.2766	10	None Specific Cluster	[FBN1, ITGB3, LTBP1, LTBP3, PMEPA1, XPO1]	[PPP1R15A, SMAD7, TGFB3, UBB]	60	40	52.8783	47.1217	[FBN1, ITGB3, LTBP1, LTBP3, PMEPA1, PPP1R15A, SMAD7, TGFB3, UBB, XPO1]
HALLMARK_MYOGENESIS_33	HALLMARK_MYOGENESIS	CUSTOM_h.all.v2023.2.Hs.symbols.gmt_09.04.2024	3.64446e-11	2.09192e-08	3.64446e-11	1.05689e-09	[-1]	Group16	15.5	31	Specific for Cluster #1	[AK1, BIN1, CAV3, CDH13, COL15A1, COL1A1, COL3A1, COL6A2, COL6A3, FABP3, FDPS, FHL1, GAA, GSN, HSPB8, NCAM1, NQO1, PRNP, SGCD, SGCG, SH3BGR, SOD3, SPARC, TCAP]	[CDKN1A, GADD45B, HBEGF, IFRD1, MEF2C, SORBS1, TNNT2]	77.4194	22.5806	71.9491	28.0509	[AK1, BIN1, CAV3, CDH13, CDKN1A, COL15A1, COL1A1, COL3A1, COL6A2, COL6A3, FABP3, FDPS, FHL1, GAA, GADD45B, GSN, HBEGF, HSPB8, IFRD1, MEF2C, NCAM1, NQO1, PRNP, SGCD, SGCG, SH3BGR, SOD3, SORBS1, SPARC, TCAP, TNNT2]
HALLMARK_UV_RESPONSE_DN_46	HALLMARK_UV_RESPONSE_DN	CUSTOM_h.all.v2023.2.Hs.symbols.gmt_09.04.2024	4.41714e-11	2.53544e-08	4.41714e-11	1.28097e-09	[-1]	Group19	18.0556	26	None Specific Cluster	[ABCC1, ANXA2, COL1A1, COL1A2, COL3A1, COL5A2, FBLN5, FZD2, GJA1, INSIG1, ITGB3, LAMC1, LTBP1, MYC, PDGFRB, PMP22, RGS4]	[CCN1, CITED2, DUSP1, FHL2, ID1, IGF1R, RND3, SDC2, SMAD7]	65.3846	34.6154	58.5595	41.4405	[ABCC1, ANXA2, CCN1, CITED2, COL1A1, COL1A2, COL3A1, COL5A2, DUSP1, FBLN5, FHL2, FZD2, GJA1, ID1, IGF1R, INSIG1, ITGB3, LAMC1, LTBP1, MYC, PDGFRB, PMP22, RGS4, RND3, SDC2, SMAD7]
HALLMARK_APOPTOSIS_6	HALLMARK_APOPTOSIS	CUSTOM_h.all.v2023.2.Hs.symbols.gmt_09.04.2024	1.08916e-10	6.25179e-08	1.08916e-10	3.15857e-09	[-1]	Group01	16.7702	27	Specific for Cluster #2	[ANKH, CTNNB1, DCN, DIABLO, F2R, GSN, H1-0, LUM, PDGFRB, SC5D, TIMP2, TIMP3]	[ATF3, BCL2L1, BTG2, CDKN1A, DDIT3, GADD45B, HMGB2, HSPB1, IER3, IRF1, JUN, MCL1, ROCK1, SMAD7, TXNIP]	44.4444	55.5556	37.4409	62.5591	[ANKH, ATF3, BCL2L1, BTG2, CDKN1A, CTNNB1, DCN, DDIT3, DIABLO, F2R, GADD45B, GSN, H1-0, HMGB2, HSPB1, IER3, IRF1, JUN, LUM, MCL1, PDGFRB, ROCK1, SC5D, SMAD7, TIMP2, TIMP3, TXNIP]
bioplanet_1343	AP-1 transcription factor network	CUSTOM_BioPlanet-pathway.txt.txt_09.04.2024	7.30138e-09	4.19099e-06	7.30138e-09	2.1174e-07	[-1]	Group05	22.8571	16	Specific for Cluster #2	[COL1A2, CTNNB1, GJA1, HIF1A, HLA-A, MYC]	[ATF3, CCN1, DUSP1, EGR1, FOS, FOSB, JUN, JUNB, JUND, MT2A]	37.5	62.5	30.9805	69.0195	[ATF3, CCN1, COL1A2, CTNNB1, DUSP1, EGR1, FOS, FOSB, GJA1, HIF1A, HLA-A, JUN, JUNB, JUND, MT2A, MYC]
WP5373_792	Osteoarthritic chondrocyte hypertrophy	CUSTOM_wikipathways-20240310-gmt-Homo-sapiens (1).gmt_09.04.2024	3.6155e-08	2.0753e-05	3.6155e-08	1.0485e-06	[-1]	Group21	26	13	Specific for Cluster #2	[COL1A1, COL3A1, DDR2, HIF1A, P4HTM]	[CCN2, CEBPB, EPAS1, FOS, FOSB, JUN, JUNB, JUND]	38.4615	61.5385	31.8601	68.1399	[CCN2, CEBPB, COL1A1, COL3A1, DDR2, EPAS1, FOS, FOSB, HIF1A, JUN, JUNB, JUND, P4HTM]
HALLMARK_ANDROGEN_RESPONSE_2	HALLMARK_ANDROGEN_RESPONSE	CUSTOM_h.all.v2023.2.Hs.symbols.gmt_09.04.2024	5.42163e-08	3.11202e-05	5.42163e-08	1.57227e-06	[-1]	Group00	17.8218	18	Specific for Cluster #1	[ANKH, B4GALT1, DBI, H1-0, HMGCS1, IDI1, INSIG1, PMEPA1, SEC24D, SELENOP, SRP19, TPD52, TSC22D1]	[MERTK, NDRG1, PLPP1, SGK1, SLC38A2]	72.2222	27.7778	66.0452	33.9548	[ANKH, B4GALT1, DBI, H1-0, HMGCS1, IDI1, INSIG1, MERTK, NDRG1, PLPP1, PMEPA1, SEC24D, SELENOP, SGK1, SLC38A2, SRP19, TPD52, TSC22D1]
bioplanet_1433	TSH regulation of gene expression	CUSTOM_BioPlanet-pathway.txt.txt_09.04.2024	1.63653e-07	9.39367e-05	1.63653e-07	4.74593e-06	[-1]	Group09	17.5258	17	Specific for Cluster #2	[ADM, CYBA, MYC, PPIC, TANC2, TIMP3]	[EGR1, FOS, GADD45B, HES1, ID1, JUN, MEF2C, NR4A1, PHLDB2, PPP1R15A, PXDC1]	35.2941	64.7059	28.9803	71.0197	[ADM, CYBA, EGR1, FOS, GADD45B, HES1, ID1, JUN, MEF2C, MYC, NR4A1, PHLDB2, PPIC, PPP1R15A, PXDC1, TANC2, TIMP3]
WP236_100	Adipogenesis	CUSTOM_wikipathways-20240310-gmt-Homo-sapiens (1).gmt_09.04.2024	1.45438e-07	8.34813e-05	1.87692e-07	5.44307e-06	[-1]	Group24	15.2672	20	Specific for Cluster #2	[BMP1, BMP3, CTNNB1, FOXO1, FRZB, HIF1A]	[CDKN1A, CEBPB, CEBPD, DDIT3, EBF1, EPAS1, GADD45B, ID3, KLF15, KLF6, KLF7, MEF2C, SOCS3, TWIST1]	30	70	24.2779	75.7221	[BMP1, BMP3, CDKN1A, CEBPB, CEBPD, CTNNB1, DDIT3, EBF1, EPAS1, FOXO1, FRZB, GADD45B, HIF1A, ID3, KLF15, KLF6, KLF7, MEF2C, SOCS3, TWIST1]
bioplanet_1732	Adipogenesis	CUSTOM_BioPlanet-pathway.txt.txt_09.04.2024	1.87692e-07	0.000107735	1.87692e-07	5.44307e-06	[-1]	Group24	15.0376	20	Specific for Cluster #2	[BMP1, BMP3, CTNNB1, FOXO1, FRZB, HIF1A]	[CDKN1A, CEBPB, CEBPD, DDIT3, EBF1, EPAS1, GADD45B, ID3, KLF15, KLF6, KLF7, MEF2C, SOCS3, TWIST1]	30	70	24.2779	75.7221	[BMP1, BMP3, CDKN1A, CEBPB, CEBPD, CTNNB1, DDIT3, EBF1, EPAS1, FOXO1, FRZB, GADD45B, HIF1A, ID3, KLF15, KLF6, KLF7, MEF2C, SOCS3, TWIST1]
bioplanet_1747	Oxidative stress	CUSTOM_BioPlanet-pathway.txt.txt_09.04.2024	4.57972e-07	0.000262876	4.57972e-07	1.32812e-05	[-1]	Group13	33.3333	9	Specific for Cluster #1	[CAT, CYBA, GSTT2, MGST1, NFIX, NQO1, SOD3]	[FOS, JUNB]	77.7778	22.2222	72.3634	27.6366	[CAT, CYBA, FOS, GSTT2, JUNB, MGST1, NFIX, NQO1, SOD3]
HALLMARK_P53_PATHWAY_36	HALLMARK_P53_PATHWAY	CUSTOM_h.all.v2023.2.Hs.symbols.gmt_09.04.2024	7.82858e-07	0.00044936	7.82858e-07	2.27029e-05	[-1]	Group17	12.0603	24	Specific for Cluster #2	[AK1, CDH13, F2R, FAM162A, H1-2, RPS27L, S100A10, TSC22D1]	[ATF3, BTG1, BTG2, CDKN1A, DDIT3, FOS, HBEGF, IER3, IER5, JUN, KLF4, NDRG1, PPP1R15A, TOB1, TXNIP, ZBTB16]	33.3333	66.6667	27.2227	72.7773	[AK1, ATF3, BTG1, BTG2, CDH13, CDKN1A, DDIT3, F2R, FAM162A, FOS, H1-2, HBEGF, IER3, IER5, JUN, KLF4, NDRG1, PPP1R15A, RPS27L, S100A10, TOB1, TSC22D1, TXNIP, ZBTB16]
R-HSA:1638074	Keratan sulfate/keratin metabolism	REACTOME_Pathways_09.04.2024	6.7348e-06	0.00386577	9.81649e-07	2.84678e-05	[-1]	Group27	25	9	Specific for Cluster #1	[B4GALT1, GNS, HEXA, HEXB, LUM, PRELP, ST3GAL2, ST3GAL4]	[OMD]	88.8889	11.1111	85.6834	14.3166	[B4GALT1, GNS, HEXA, HEXB, LUM, OMD, PRELP, ST3GAL2, ST3GAL4]
R-HSA:2022857	Keratan sulfate degradation	REACTOME_Pathways_09.04.2024	1.21313e-05	0.00696335	9.81649e-07	2.84678e-05	[-1]	Group27	40	6	Specific for Cluster #1	[GNS, HEXA, HEXB, LUM, PRELP]	[OMD]	83.3333	16.6667	78.9054	21.0946	[GNS, HEXA, HEXB, LUM, OMD, PRELP]
R-HSA:3560782	Diseases associated with glycosaminoglycan metabolism	REACTOME_Pathways_09.04.2024	2.63431e-06	0.0015121	9.81649e-07	2.84678e-05	[-1]	Group27	24.3902	10	Specific for Cluster #1	[B4GALT1, DCN, HEXA, HEXB, LUM, PRELP, VCAN]	[GPC3, OMD, SDC2]	70	30	63.578	36.422	[B4GALT1, DCN, GPC3, HEXA, HEXB, LUM, OMD, PRELP, SDC2, VCAN]
bioplanet_864	Keratan sulfate/keratin metabolism	CUSTOM_BioPlanet-pathway.txt.txt_09.04.2024	1.71479e-06	0.000984289	9.81649e-07	2.84678e-05	[-1]	Group27	29.0323	9	Specific for Cluster #1	[B4GALT1, GNS, HEXA, HEXB, LUM, PRELP, ST3GAL2, ST3GAL4]	[OMD]	88.8889	11.1111	85.6834	14.3166	[B4GALT1, GNS, HEXA, HEXB, LUM, OMD, PRELP, ST3GAL2, ST3GAL4]
bioplanet_882	Keratan sulfate degradation	CUSTOM_BioPlanet-pathway.txt.txt_09.04.2024	1.27902e-06	0.000734159	9.81649e-07	2.84678e-05	[-1]	Group27	54.5455	6	Specific for Cluster #1	[GNS, HEXA, HEXB, LUM, PRELP]	[OMD]	83.3333	16.6667	78.9054	21.0946	[GNS, HEXA, HEXB, LUM, OMD, PRELP]
WP3888_287	VEGFA VEGFR2 signaling	CUSTOM_wikipathways-20240310-gmt-Homo-sapiens (1).gmt_09.04.2024	1.40114e-06	0.000804256	1.40114e-06	4.06332e-05	[-1]	Group20	9.00693	39	None Specific Cluster	[ADAM10, ARPC5L, BIN1, CALU, CTNNB1, FN1, FOXO1, GJA1, HSPA1A, HTRA1, HYOU1, ITGB3, LDB2, P4HA2, PFN1, RCN1, RPL10A, SMARCA2, TMOD1, TNXB]	[BCL2L1, CCN1, CCN2, EGR1, EPB41, FHL2, HBEGF, HSPB1, IER5, JUN, MEF2C, NDRG1, NEXN, NFKBIA, NR4A1, PRKCD, PRKG1, ROCK1, TXNIP]	51.2821	48.7179	44.0555	55.9445	[ADAM10, ARPC5L, BCL2L1, BIN1, CALU, CCN1, CCN2, CTNNB1, EGR1, EPB41, FHL2, FN1, FOXO1, GJA1, HBEGF, HSPA1A, HSPB1, HTRA1, HYOU1, IER5, ITGB3, JUN, LDB2, MEF2C, NDRG1, NEXN, NFKBIA, NR4A1, P4HA2, PFN1, PRKCD, PRKG1, RCN1, ROCK1, RPL10A, SMARCA2, TMOD1, TNXB, TXNIP]
bioplanet_1414	Oncostatin M	CUSTOM_BioPlanet-pathway.txt.txt_09.04.2024	1.40677e-06	0.000807486	1.40677e-06	4.07963e-05	[-1]	Group07	9.96785	31	None Specific Cluster	[COL1A1, COL1A2, CTSB, CTSH, CXCL12, ECM1, F2R, FN1, H1-0, HIF1A, HMGCS1, MYC, SELENOP, TCEAL3, TIMP2]	[ATF3, C1R, C1S, CCN1, CCN2, CDKN1A, CEBPD, EPAS1, HK2, IER3, IRF1, JUN, JUNB, MT2A, SLC22A1, SOCS3]	48.3871	51.6129	41.2233	58.7767	[ATF3, C1R, C1S, CCN1, CCN2, CDKN1A, CEBPD, COL1A1, COL1A2, CTSB, CTSH, CXCL12, ECM1, EPAS1, F2R, FN1, H1-0, HIF1A, HK2, HMGCS1, IER3, IRF1, JUN, JUNB, MT2A, MYC, SELENOP, SLC22A1, SOCS3, TCEAL3, TIMP2]
R-HSA:381426	Regulation of Insulin-like Growth Factor (IGF) transport and uptake by Insulin-like Growth Factor Binding Proteins (IGFBPs)	REACTOME_Pathways_09.04.2024	1.46854e-06	0.00084294	1.46854e-06	4.25876e-05	[-1]	Group25	14.4	18	Specific for Cluster #1	[ADAM10, CALU, FBN1, FN1, FSTL1, GAS6, LAMC1, LTBP1, NUCB1, RCN1, TMEM132A, VCAN, WFS1]	[CCN1, GPC3, PNPLA2, PRSS23, SDC2]	72.2222	27.7778	66.0452	33.9548	[ADAM10, CALU, CCN1, FBN1, FN1, FSTL1, GAS6, GPC3, LAMC1, LTBP1, NUCB1, PNPLA2, PRSS23, RCN1, SDC2, TMEM132A, VCAN, WFS1]
R-HSA:8957275	Post-translational protein phosphorylation	REACTOME_Pathways_09.04.2024	1.57247e-07	9.026e-05	1.46854e-06	4.25876e-05	[-1]	Group25	16.6667	18	Specific for Cluster #1	[ADAM10, CALU, FBN1, FN1, FSTL1, GAS6, LAMC1, LTBP1, NUCB1, RCN1, TMEM132A, VCAN, WFS1]	[CCN1, GPC3, PNPLA2, PRSS23, SDC2]	72.2222	27.7778	66.0452	33.9548	[ADAM10, CALU, CCN1, FBN1, FN1, FSTL1, GAS6, GPC3, LAMC1, LTBP1, NUCB1, PNPLA2, PRSS23, RCN1, SDC2, TMEM132A, VCAN, WFS1]
HALLMARK_COAGULATION_9	HALLMARK_COAGULATION	CUSTOM_h.all.v2023.2.Hs.symbols.gmt_09.04.2024	1.51161e-06	0.000867665	1.51161e-06	4.38367e-05	[-1]	Group22	13.7681	19	Specific for Cluster #1	[BMP1, CTSB, CTSH, FBN1, FN1, GSN, HMGCS2, HTRA1, ITGB3, LGMN, LRP1, SPARC, THBD, TIMP3]	[C1R, C1S, KLF7, MAFF, PRSS23]	73.6842	26.3158	67.6868	32.3132	[BMP1, C1R, C1S, CTSB, CTSH, FBN1, FN1, GSN, HMGCS2, HTRA1, ITGB3, KLF7, LGMN, LRP1, MAFF, PRSS23, SPARC, THBD, TIMP3]
R-HSA:9031628	NGF-stimulated transcription	REACTOME_Pathways_09.04.2024	1.60191e-06	0.000919495	1.60191e-06	4.64553e-05	[-1]	Group04	25.641	10	Specific for Cluster #2	[]	[EGR1, FOS, FOSB, ID1, ID2, ID3, ID4, JUNB, JUND, SGK1]	0	100	0	100	[EGR1, FOS, FOSB, ID1, ID2, ID3, ID4, JUNB, JUND, SGK1]
HALLMARK_IL2_STAT5_SIGNALING_22	HALLMARK_IL2_STAT5_SIGNALING	CUSTOM_h.all.v2023.2.Hs.symbols.gmt_09.04.2024	2.77827e-06	0.00159473	2.77827e-06	8.05699e-05	[-1]	Group08	11.5578	23	Specific for Cluster #2	[ALCAM, COL6A1, DHRS3, ECM1, MYC, PRAF2, PRNP, SOCS2, ST3GAL4, TWSG1]	[BCL2L1, GADD45B, HK2, IGF1R, KLF6, MAFF, NCS1, NDRG1, NFKBIZ, PHLDA1, PIM1, PLPP1, PTH1R]	43.4783	56.5217	36.5269	63.4731	[ALCAM, BCL2L1, COL6A1, DHRS3, ECM1, GADD45B, HK2, IGF1R, KLF6, MAFF, MYC, NCS1, NDRG1, NFKBIZ, PHLDA1, PIM1, PLPP1, PRAF2, PRNP, PTH1R, SOCS2, ST3GAL4, TWSG1]
R-HSA:9006934	Signaling by Receptor Tyrosine Kinases	REACTOME_Pathways_09.04.2024	5.46476e-06	0.00313677	5.46476e-06	0.000158478	[-1]	Group03	8.05243	43	None Specific Cluster	[ADAM10, COL1A1, COL1A2, COL3A1, COL4A5, COL5A1, COL5A2, COL6A1, COL6A2, COL6A3, CTNNB1, CXCL12, CYBA, FGFRL1, FN1, HIF1A, ITGB3, LAMC1, MYC, PDGFRB, POLR2D, POLR2I, POLR2L, PTPRS, SPARC]	[EGR1, FOS, FOSB, HBEGF, HSPB1, ID1, ID2, ID3, ID4, IGF1R, JUNB, JUND, MEF2C, PRKCD, ROCK1, SGK1, SPRY1, UBB]	58.1395	41.8605	50.9574	49.0426	[ADAM10, COL1A1, COL1A2, COL3A1, COL4A5, COL5A1, COL5A2, COL6A1, COL6A2, COL6A3, CTNNB1, CXCL12, CYBA, EGR1, FGFRL1, FN1, FOS, FOSB, HBEGF, HIF1A, HSPB1, ID1, ID2, ID3, ID4, IGF1R, ITGB3, JUNB, JUND, LAMC1, MEF2C, MYC, PDGFRB, POLR2D, POLR2I, POLR2L, PRKCD, PTPRS, ROCK1, SGK1, SPARC, SPRY1, UBB]
bioplanet_1438	EGFR1 pathway	CUSTOM_BioPlanet-pathway.txt.txt_09.04.2024	6.48926e-06	0.00372483	6.48926e-06	0.000188188	[-1]	Group10	12.5	19	Specific for Cluster #2	[CDO1, CTSH, GRN, LRP1, MYC, PDLIM4, TIMP3]	[BTG1, CDKN1A, DUSP1, EHD1, HBEGF, HSPB1, ID3, IER3, MT1F, PHLDA1, TXNIP, ZFP36L2]	36.8421	63.1579	30.3814	69.6186	[BTG1, CDKN1A, CDO1, CTSH, DUSP1, EHD1, GRN, HBEGF, HSPB1, ID3, IER3, LRP1, MT1F, MYC, PDLIM4, PHLDA1, TIMP3, TXNIP, ZFP36L2]
bioplanet_1413	T cell receptor regulation of apoptosis	CUSTOM_BioPlanet-pathway.txt.txt_09.04.2024	1.15308e-05	0.00661868	1.15308e-05	0.000334393	[-1]	Group06	7.62852	46	Specific for Cluster #2	[BAG2, CTSB, F2R, FDPS, FOXO1, HAX1, HMGN1, HMGN2, HSPA1A, HSPA2, IKBIP, MYC, NME1, NQO1, NUCB1, PALM, RPL10A, S100A10, SEC61B, SERPINE2, STK17B]	[ARHGDIB, ATF3, BTG1, CDKN1A, CEBPD, DDIT3, DUSP1, EEF2, EGR1, EPAS1, FOS, FOSB, GADD45B, GOLGB1, IER2, IER3, IRF1, JUN, JUNB, JUND, MCL1, NFKBIA, NR4A1, PIM1, PNRC1]	45.6522	54.3478	38.5905	61.4095	[ARHGDIB, ATF3, BAG2, BTG1, CDKN1A, CEBPD, CTSB, DDIT3, DUSP1, EEF2, EGR1, EPAS1, F2R, FDPS, FOS, FOSB, FOXO1, GADD45B, GOLGB1, HAX1, HMGN1, HMGN2, HSPA1A, HSPA2, IER2, IER3, IKBIP, IRF1, JUN, JUNB, JUND, MCL1, MYC, NFKBIA, NME1, NQO1, NR4A1, NUCB1, PALM, PIM1, PNRC1, RPL10A, S100A10, SEC61B, SERPINE2, STK17B]
bioplanet_629	Interleukin-6 signaling pathway	CUSTOM_BioPlanet-pathway.txt.txt_09.04.2024	1.59237e-05	0.0091402	1.59237e-05	0.000461787	[-1]	Group15	16.9014	12	Specific for Cluster #2	[FOXO1, MYC]	[BCL2L1, CEBPB, CEBPD, FOS, IRF1, JUN, JUNB, MCL1, PRKCD, SOCS3]	16.6667	83.3333	13.0149	86.9851	[BCL2L1, CEBPB, CEBPD, FOS, FOXO1, IRF1, JUN, JUNB, MCL1, MYC, PRKCD, SOCS3]
bioplanet_202	Lysosome	CUSTOM_BioPlanet-pathway.txt.txt_09.04.2024	1.69429e-05	0.00972522	1.69429e-05	0.000491344	[-1]	Group14	13.2231	16	Specific for Cluster #1	[AP3M1, CD164, CTSB, CTSC, CTSH, GAA, GNS, GUSB, HEXA, HEXB, LAMP1, LAPTM4A, LAPTM4B, LGMN, PSAP, SCARB2]	[]	100	0	100	0	[AP3M1, CD164, CTSB, CTSC, CTSH, GAA, GNS, GUSB, HEXA, HEXB, LAMP1, LAPTM4A, LAPTM4B, LGMN, PSAP, SCARB2]

## Sheet: ClueGOResults3 ClueGOLog
Selection Citeria:
Statistical Test Used = Enrichment/Depletion (Two-sided hypergeometric test)
Use pvalue cutoff = true
pvalue cutoff = 0.01
Correction Method Used = Bonferroni
Min GO Level = 3
Max GO Level = 8
Cluster #1
Sample File Name = File selection:
Number of Genes = 3
Min Percentage = 4.0
Cluster #2
Sample File Name = File selection:
Number of Genes = 3
Min Percentage = 4.0
Combine Clusters With 'Or' = true
Percentage for a Cluster to be Specific = 60.0
GO Fusion = false
GO Group = true
Kappa Score Threshold = 0.4
Over View Term = GenePercentInitialList
Group By Kappa Statistics = true
Initial Group Size = 1
Sharing Group Percentage = 50.0
ClueGO Log:
### All results were created with ClueGO v2.5.10 ###
Organism analyzed: Homo Sapiens [9606]
Identifier types used: [SymbolID]
Evidence codes used: [All]
#Genes in CUSTOM_h.all.v2023.2.Hs.symbols.gmt_09.04.2024 : 4382
#Genes in KEGG_09.04.2024 : 8736
#Genes in CUSTOM_wikipathways-20240310-gmt-Homo-sapiens (1).gmt_09.04.2024 : 8421
#Genes in CUSTOM_BioPlanet-pathway.txt.txt_09.04.2024 : 9819
#Genes in REACTOME_Pathways_09.04.2024 : 11091
#All unique genes in selected ontologies: 14836 (reference set for hypergeometric test)
#Genes from Cluster#1: unique uploaded ids 499 -> corresponding genes 497, with 2 (0.4%) missing -> 497 recognized by ClueGO.
#Genes from Cluster#2: unique uploaded ids 199 -> corresponding genes 197, with 2 (1.01%) missing -> 197 recognized by ClueGO.
-> To improve the % of found genes, verify gene identifiers, download new available ClueGO conversion files or add/request additional files.
#Genes with functional annotations in all selected Ontologies from Cluster#1: 413 (83.1%) -> 84 (16.9%) are not functionally annotated in any selected Ontology!
#Genes with functional annotations in all selected Ontologies from Cluster#2: 162 (82.23%) -> 35 (17.77%) are not functionally annotated in any selected Ontology!
#Unique genes with functional annotations in all selected ontologies from the 2 Clusters: 574 (82.83%) -> 119 (17.17%) are not functionally annotated!
-> To improve the % of annotated genes, chose additional ontologies.
#Genes from all Clusters associated to 883 representative Terms and Pathways (after applying general selection criteria): 540 (77.92%)
#Genes from all Clusters associated to 64 representative Terms and Pathways (after p-value significance selection criteria): 331 (47.76%)
KappaScore Grouping:
Iteration: 0 with 37 groups
Iteration: 1 with 30 groups
Final KappaScore groups = 30
# Terms not grouped = 0
# Merge redundant groups with >50.0% overlap
Final group size after merging: 30
#GO All Terms Specific for Cluster #1: 43
#GO All Terms Specific for Cluster #2: 14
#GO All Terms not Specific for a Cluster: 7
#GO Terms: 64
#GO Term Connections: 126
List of missing Genes -> make sure the ids exists or are written propperly -> if yes make sure you have their annotation in ClueGO!
Cluster #1
Gene IDs not found (no annotation or wrong ids) in Cluster#1:
N/A
PRORSD1
Cluster #2
Gene IDs not found (no annotation or wrong ids) in Cluster#2:
N/A
TMT1A

## Sheet: EnrichR_Downregulated
Downregulated Transcripts mouse Tgfbr1(M318R/+) vs Tgfbr1(+/+) VSMC
Table of top 10 significant p-values and q-values for ENCODE and ChEA Consensus TFs from ChIP-X
term	p-value	q-value	overlap_genes
USF2 ENCODE	1.1e-05	0.001189	[CUTA, SCARB2, GRN, PTPRS, DDX3X, INSIG1, HEXA, PIGP, ZBTB8OS, MRPL36, DBI, GNS, HIF1A, MRPL41, SOCS2, COMTD1, LAPTM4A, MIEN1, SNX2, XPO1, LAMP1, HSF2, PSAP, SSR1, SC5D, HMGN2, GUSB, TMEM14C, HMGN1, SEC11C, CTSB, CD164, UQCC2, GAA, ARRDC3, MRPL27, NME2, ADAM10, NR1D1, ARPC5, RC3H2, NME1, TEN1, TMEM258, SUB1, STK17B, OTUD1]
USF1 ENCODE	9.9e-05	0.005128	[SCARB2, PTPRS, DDX3X, HEXA, PIGP, ZBTB8OS, MRPL36, DBI, MRPL41, SCPEP1, LAPTM4B, COMTD1, C1QTNF2, EFEMP2, XPO1, LAMP1, HMGN2, GUSB, SLC39A1, TMEM14C, HMGN1, CTSB, SLC38A1, GAA, ARRDC3, BOLA1, NME2, FNDC3B, ADAM10, RC3H2, NME1, ASPH, TMEM258, SUB1, CLIP4, SNRPE, HNRNPH3, CUTA, GRN, INSIG1, GNS, HIF1A, SOCS2, MIEN1, SNX2, HSF2, TCEAL1, PSAP, SSR1, SC5D, SEC11C, CD164, MRPL27, NR1D1, ARPC5, TEN1, S…
NFE2L2 CHEA	0.000188	0.006513	[ECM1, COL14A1, SYNPO2, SRA1, LAMC1, RPL10A, ADCY7, RGS4, SCPEP1, LAPTM4B, GJA1, ST3GAL4, DLGAP1, ENPP5, ST3GAL2, CTSB, CD164, NQO1, ABCC1, PRRX1, MMD, BUD31, FN1, ACYP1, PLXDC2, MAGOHB, ATP1B1, CPPED1, TANC2, DCN, MN1, VCAN, COL1A2, COL5A1, SUB1, QPCT, PPDPF, CAT, PI15, GAS1, CD302, SEC24D, PAM, DDR2, COX20]
MAX ENCODE	0.00029	0.007542	[SRP19, PTPRS, DDX3X, HEXA, PIGP, ARPC5L, ZBTB8OS, MRPL36, DBI, RPL10A, MRPL41, LAPTM4B, COMTD1, XPO1, LAMP1, FAM162A, TMED1, SEC61B, GUSB, SLC39A1, CTSC, SLC38A1, PARP3, ANAPC7, METTL1, BUD31, BOLA1, NME2, NME1, ADAM15, ASPH, TMEM258, MORF4L2, RAB34, SUB1, RPL7L1, DNLZ, SNRPE, TAGLN2, NAA38, HNRNPH3, SRSF6, PFN1, CUTA, GRN, DIABLO, INSIG1, CSTF3, COX18, SRSF1, MRPL17, TOB2, GNS, HIF1A, SOCS2, AP…
TCF7L2 ENCODE	0.000399	0.008296	[IDI1, TES, SEMA3C, LRP1, PLGRKT, HSPB6, HEXB, SRSF1, CXXC1, SOCS2, NXF1, AP3M1, RGS5, XPO1, CDIPT, S100A10, TMOD1, DSP, PRKAB2, SSR2, NR1D1, ATP1B1, CPPED1, XK, OGDH, TAGLN2, HNRNPH3, SRSF6, COX20]
BHLHE40 ENCODE	0.001356	0.02351	[CUTA, CD164, DDX3X, UQCC2, HEXA, MRPS34, NR1D1, GNS, HIF1A, SOCS2, SNX2, XPO1, MIEN1, TEN1, LAMP1, HSF2, PSAP, PFN1, HMGN2]
SMC3 ENCODE	0.002107	0.029856	[GRN, SMIM5, SEMA3C, LRP1, COL14A1, NPR1, SYNPO2, ELN, SLC35B1, MRPS34, CXXC1, MRPL17, LAMC1, LTBP1, MYLK4, MRPL41, SOCS2, THBD, COMTD1, MIEN1, SLC25A23, NDUFV2, NPDC1, PARP3, UQCC2, OSBPL3, UBE2E3, ARRDC3, DHRS3, PDGFRL, COL1A1, COL1A2, CXCL12, BMP1, GGCX, NEMF, SMOC1, MORF4L2, NDUFAF4, DNLZ, CCDC42, SNRPE, LGR6, NES, RAMP1, RHOQ]
SOX2 CHEA	0.002297	0.029856	[PRPS2, SMIM3, SCARB2, CSTF3, FBLN1, NTN1, FOXO1, ZCCHC14, SOCS2, GJA1, LAPTM4A, FAM162A, ST3GAL4, TPD52, DDX17, FZD2, SSR2, ARRDC3, FN1, MTUS1, FNDC3B, ATP1B1, MTSS1, SULF2, RCN1, TWSG1, NEMF, FKBP7, CTNNB1, CDH13, LGR6, SRSF6, PPIC]
ERG CHEA	0.003487	0.04029	[LARS2, IDI1, CD164, PIGT, LAMP1, OGDH, CALU, CTNNB1, NDUFV3, SMIM20]
CTCF ENCODE	0.005861	0.058005	[FKBP10, GALNT16, COL14A1, ELN, ITGB3, SLC35B1, LAMC1, RPL10A, TMEM141, MYLK4, THBD, COMTD1, ALCAM, FAM162A, PARP3, GAA, UBE2E3, ARRDC3, NME2, PDGFRL, NME1, NEMF, MORF4L2, PPDPF, DNLZ, GAS1, FKBP7, CCDC42, SNRPE, HNRNPH3, RHOQ, ITGA9, GRN, SMIM5, LRP1, NPR1, MRPS34, ABHD8, CXXC1, MRPL17, CLCN3, LTBP1, SMIM8, SOCS2, AP3M1, MIEN1, SLC25A23, CDIPT, NPDC1, CD164, UQCC2, TAF10, SORL1, SULF2, COL1A1, C…

## Sheet: EnrichR_Upregulated
Upregulated Transcripts Tgfbr1(M318R/+) vs Tgfbr1(+/+) VSMC
Table of top 10 significant p-values and q-values for ENCODE and ChEA Consensus TFs from ChIP-X
term	p-value	q-value	overlap_genes
GATA2 CHEA	7.95083e-12	7.95083e-10	[PPP1R15A, BTG2, CDKN1A, CEBPB, HMGB2, FHL2, ART3, ZFP36L2, IGF1R, ARHGDIB, PACSIN2, GCNT2, PIM1, HES1, IER5, IER2, JUN, MEF2C, ZBTB16, IRF2BP2, UBALD2, SORBS2, ACTN4, FOS, SORBS1, KLF2, GADD45G, EHD1, KLF6, TXNIP, PKIG, BCL2L1]
NELFE ENCODE	2.21723e-10	8.7275e-09	[EGR1, BTG1, GADD45B, DUSP1, CITED2, HMGB2, FOS, EEF2, TOB1, EHD1, KLF6, ID2, DDIT3, PACSIN2, MALAT1, JUNB, IER5]
CEBPD ENCODE	2.61825e-10	8.7275e-09	[PPP1R15A, BTG2, CEBPB, BTG1, HMGB2, TOB1, ZFP36L2, UBB, CCNL1, JUNB, IER5, SLC38A2, MCL1, JUN, GADD45B, DUSP1, FOS, KLHL24, EEF2, SMAD6, KLF3, NFKBIA, ANLN, KLF6, DDIT3, ID1, TXNIP, MALAT1, TLN1]
NFE2L2 CHEA	2.35119e-09	5.87799e-08	[CPNE8, CDKN1A, CEBPB, BTG1, EPB41, CITED2, FAM13C, TWIST1, RND3, PREX2, SOCS3, PDLIM3, LBH, PLN, ARHGDIB, PACSIN2, PXDC1, HES1, LMCD1, PHLDA1, PRKG1, DUSP1, PRKCD, CRIM1, IRF2BP2, SORBS2, KLF4, GADD45G, KLF6, LRCH1, MAFF, CDC42EP3, SGK1]
PPARG CHEA	2.21792e-08	4.43584e-07	[BRD2, JUN, CDKN1A, BTG1, CITED2, ACTN4, FOS, SMAD6, TOB1, ZFP36L2, EHD1, KLF7, KLF6, UBB, DDIT3, GCNT2, AMOTL2, PIM3, PHLDA1, GNE, PNPLA2, BCL2L1]
ZMIZ1 ENCODE	3.62807e-08	6.04679e-07	[BTG2, CEBPB, BTG1, EPB41, CITED2, HMGB2, AK3, TOB1, NDRG1, ZFP36L2, ZFP36, SERTAD1, PIM3, SAMD1, JUNB, IER5, IER2, IER3, MCL1, EGR1, JUND, GADD45B, DUSP1, IRF2BP2, MRPS6, PNRC1, KLF7, KLF6, ESYT2]
TCF3 ENCODE	8.70203e-08	1.163e-06	[CSRNP1, CEBPB, BTG1, IER5L, AK3, TOB1, ZFP36L2, TRIM8, SERTAD1, PACSIN2, HES1, RALY, CCNL1, JUNB, PHLDA1, MCL1, EGR1, GADD45B, DUSP1, IRF2BP2, EEF2, SMAD7, KLF7, KLF6, CDC42EP3, MALAT1, ATF3]
RELA ENCODE	9.304e-08	1.163e-06	[JUN, BTG1, GADD45B, CITED2, HMGB2, IRF2BP2, EEF2, PNRC1, ZFP36L2, EHD1, NFKBIA, KLF6, IRF1, NFKBIZ, MALAT1, CCNL1, JUNB, IER5, IER3, MCL1]
SALL4 CHEA	1.13257e-07	1.25841e-06	[CEBPB, CITED2, UBALD2, PRSS23, HK2, NFKBIA, ANLN, PLN, UBB, ID2, ARHGDIB, GCNT2, ID3, HES1, TLN1, PHLDB2, SLC38A2]
AR CHEA	1.51765e-07	1.51765e-06	[SLC22A3, FAM13C, RASAL2, LIMD1, NDRG1, RND3, ZFP36L2, IGF1R, PREX2, SOCS3, PACSIN2, CCNL1, TMEM38B, PRKG1, MARK1, KCMF1, OSBPL9, MEF2C, GADD45B, NPY1R, CRIM1, SORBS2, SORBS1, KLF2, SFRP1, KLF6, PALLD, CDC42EP3, SPRY1, PHLDB2, BCL2L1]
