# Supplementary material for: Intrinsic Gata4 expression sensitizes the aortic root to dilation in a Loeys-Dietz syndrome mouse model
Source: Research Square preprint supplement (doi:10.21203/rs.3.rs-4420617/v1), 2024-06-05
Supplement: Supplementary file 9 [file Supplemental Table 3.xlsx]

## Sheet: Table 1
Supplemental Table 3.
List of transcripts included in custom MERFISH panel "AorticAneurysmandDissection" Details Reference Mouse Tissue Pan Mouse Total Genes 425 MERFISH 425 Sequential 0 Comment Tissue is mouse aorta Panel ID 49afc220-150f-470a-be16-5c14a650e9b4 Serial Number CP0953 Genes list Genes list С - Custom Input P - Predesigned Panel E - Exogenous Sequence
	Gene Input	Identiﬁed Gene Name	Abundance, FPKM	Target Regions
C	CAV2	Cav2	8.99053	51
C	ACTR2	Actr2	37.15	77
C	PDGFB	Pdgfb	4.01221	53
C	SOX9	Sox9	4.39167	94
C	SERPINF1	Serpinf1	11.9705	51
C	COL6A1	Col6a1	20.5869	129
C	COL6A2	Col6a2	18.4809	59
C	CNN1	Cnn1	16.4285	56
C	SOST	Sost	0.59509	53
C	COL1A1	Col1a1	30.5439	156
C	FXR1	Fxr1	11.0539	75
C	GSTT1	Gstt1	30.2379	55
C	ACE	Ace	15.0898	50
C	LTBP2	Ltbp2	1.0955	184
C	TGFB1	Tgfb1	12.2128	58
C	IER3	Ier3	15.3847	51
C	FOSB	Fosb	1.23291	79
C	TGFB3	Tgfb3	2.74639	97
C	AQP1	Aqp1	33.8077	86
C	GATAD1	Gatad1	15.1737	58
C	TGFBR1	Tgfbr1	6.5758	81
C	RHOA	Rhoa	73.1494	55
C	ID3	Id3	45.6432	53
C	FHL2	Fhl2	20.0831	56
C	TBX1	Tbx1	1.45609	66
C	PPP1CB	Ppp1cb	53.6738	105
C	ELN	Eln	9.51361	115
C	GADD45B	Gadd45b	12.2887	52
C	NOTCH4	Notch4	2.39726	135
C	SDC4	Sdc4	40.7612	70
C	TIMP2	Timp2	27.69	92
C	IGFBP4	Igfbp4	32.2662	73
C	MAFK	Mafk	6.56977	83
C	PFN1	Pfn1	467.097	62
C	PDLIM4	Pdlim4	9.73881	69
C	YWHAH	Ywhah	86.0732	60
C	HEY2	Hey2	0.53769	66
C	LIMS1	Lims1	12.0574	113
C	SGK1	Sgk1	21.871	62
C	TIMP3	Timp3	23.5264	122
C	SIRT1	Sirt1	1.98728	101
C	WIF1	Wif1	1.48384	53
C	HMMR	Hmmr	4.16128	75
C	RACK1	Rack1	290.672	56
C	BTG2	Btg2	28.2309	81
C	SMTN	Smtn	15.1396	50
C	PGAM2	Pgam2	146.416	72
C	ROCK2	Rock2	10.8695	82
C	MAP2K6	Map2k6	2.90545	64
C	ID2	Id2	43.6408	60
C	ITGB3	Itgb3	4.93311	55
C	NFKBIA	Nfkbia	65.1787	59
C	ACTN1	Actn1	17.4831	88
C	ASB2	Asb2	14.1581	80
C	FOS	Fos	17.6275	52
C	EDN1	Edn1	2.52097	61
C	ASPN	Aspn	6.43189	58
C	OGN	Ogn	16.0237	70
C	GADD45G	Gadd45g	14.7149	55
C	VCL	Vcl	6.07169	114
C	DPYSL2	Dpysl2	10.7477	133
C	EDNRB	Ednrb	1.91042	54
C	FBXO32	Fbxo32	5.92839	196
C	PARVB	Parvb	8.33966	105
C	SLC38A2	Slc38a2	23.0617	76
C	HES1	Hes1	20.0235	57
C	RETNLA	Retnla	90.3944	42
C	MYLK	Mylk	15.0528	72
C	WNT1	Wnt1	0.17177	64
C	NR4A1	Nr4a1	9.20758	73
C	SNCG	Sncg	27.6779	64
C	FHL1	Fhl1	38.9538	71
C	P3H3	P3h3	3.43406	71
C	SERPING1	Serping1	53.3201	53
C	WFDC1	Wfdc1	7.74082	57
C	XDH	Xdh	17.134	95
C	RALBP1	Ralbp1	16.4782	105
C	BAMBI	Bambi	1.23756	134
C	ZEB1	Zeb1	4.93725	76
C	LIMS2	Lims2	111.098	55
C	HBEGF	Hbegf	4.4222	50
C	SMAD4	Smad4	15.1366	51
C	LOX	Lox	1.61789	119
C	SMAD2	Smad2	4.65393	57
C	PDGFRB	Pdgfrb	3.79859	168
C	ANKRD1	Ankrd1	4.23471	55
C	PDCD4	Pdcd4	33.271	67
C	DDIT3	Ddit3	17.8603	66
C	TMEM47	Tmem47	3.52315	50
C	CLEC3B	Clec3b	23.1279	53
C	NRP1	Nrp1	7.51376	63
C	SMAD7	Smad7	4.74526	51
C	HSPD1	Hspd1	72.9573	65
C	TNNT2	Tnnt2	80.4416	61
C	ATP1B1	Atp1b1	130.122	51
C	ATF3	Atf3	3.21367	60
C	RGS4	Rgs4	6.42783	88
C	RGS5	Rgs5	20.0796	118
C	VIM	Vim	67.3296	65
C	ITGA8	Itga8	1.54008	98
C	LAMC3	Lamc3	0.36584	61
C	NOTCH1	Notch1	3.96898	225
C	FBN1	Fbn1	4.00076	302
C	JAG1	Jag1	2.59359	120
C	BMP2	Bmp2	3.62727	88
C	IL1B	Il1b	6.5093	53
C	CCN5	Ccn5	1.15398	60
C	NPR1	Npr1	2.64574	60
C	VCAM1	Vcam1	9.7159	63
C	SFRP2	Sfrp2	30.6242	52
C	ENPEP	Enpep	22.5308	51
C	ITGA10	Itga10	0.53414	83
C	CCN1	Ccn1	6.65494	59
C	TNC	Tnc	1.60571	213
C	TLN1	Tln1	16.4791	228
C	PNRC2	Pnrc2	35.2656	51
C	SEMA3C	Sema3c	3.74276	57
C	RHEB	Rheb	22.0228	54
C	SEMA3D	Sema3d	1.07055	160
C	MMP23	Mmp23	4.209	60
C	TGFBR3	Tgfbr3	4.34555	123
C	SPP1	Spp1	28.4023	62
C	SPARCL1	Sparcl1	61.8068	64
C	BMP3	Bmp3	1.22855	180
C	TESC	Tesc	11.2507	66
C	MMP17	Mmp17	1.08754	168
C	COL1A2	Col1a2	42.3829	149
C	WNT16	Wnt16	0.47547	59
C	GXYLT2	Gxylt2	0.64824	194
C	MGP	Mgp	270.926	52
C	LMCD1	Lmcd1	4.6277	60
C	NOX4	Nox4	1.85982	99
C	CTTN	Cttn	22.5251	89
C	BGN	Bgn	40.985	55
C	GAS6	Gas6	35.927	77
C	EDNRA	Ednra	1.68032	62
C	PDLIM3	Pdlim3	18.2699	50
C	NKD1	Nkd1	2.05009	50
C	MMP15	Mmp15	5.209	136
C	TAGLN	Tagln	94.3709	60
C	MCAM	Mcam	6.95196	88
C	SMAD3	Smad3	6.13767	129
C	CSRNP1	Csrnp1	4.42058	78
C	CSPG4	Cspg4	1.58045	113
C	ISL1	Isl1	3.85581	60
C	PMEPA1	Pmepa1	8.38524	104
C	KLF9	Klf9	16.6518	95
C	TTLL7	Ttll7	3.06254	53
C	MCL1	Mcl1	47.3331	91
C	CITED2	Cited2	18.1164	54
C	LUM	Lum	12.0702	74
C	ID1	Id1	48.2874	62
C	BTG1	Btg1	32.6987	131
C	VASN	Vasn	3.25517	83
C	THBS1	Thbs1	6.54358	170
C	ACTA2	Acta2	92.9844	55
C	ADAMTS2	Adamts2	1.57656	113
C	FGF1	Fgf1	5.63989	119
C	FERMT3	Fermt3	15.4435	80
C	HEYL	Heyl	1.47444	117
C	SMAD6	Smad6	3.45089	61
C	SERPINE1	Serpine1	1.06411	87
C	ENPP2	Enpp2	17.6107	98
C	VWA1	Vwa1	3.73203	106
C	HEY1	Hey1	3.53753	50
C	INHBA	Inhba	1.18117	117
C	PIM3	Pim3	12.176	55
C	SCX	Scx	1.50942	52
C	GADD45A	Gadd45a	21.2728	53
C	RAC2	Rac2	31.4227	72
C	PDE3A	Pde3a	1.54311	285
C	SMARCA5	Smarca5	12.3389	62
C	SCUBE3	Scube3	1.59713	57
C	CLDN5	Cldn5	10.9838	50
C	F11R	F11r	18.1075	57
C	FKBP1A	Fkbp1a	72.2976	56
C	HSPB6	Hspb6	36.6507	51
C	ITGA9	Itga9	2.15611	153
C	LGR6	Lgr6	0.66441	101
C	PPP1R12B	Ppp1r12b	5.3448	128
C	FMO2	Fmo2	8.43975	119
C	C1QA	C1qa	66.818	62
C	C1QB	C1qb	48.6292	51
C	IGFBP2	Igfbp2	20.0006	64
C	ATF5	Atf5	14.8262	52
C	CREB5	Creb5	0.65843	51
C	GATA6	Gata6	5.23529	51
C	FMOD	Fmod	5.58026	96
C	PPP1R14A	Ppp1r14a	14.8772	69
C	TWIST1	Twist1	1.27092	55
C	LRP1	Lrp1	8.20998	304
C	PNRC1	Pnrc1	39.3812	61
C	TCF21	Tcf21	7.40073	63
C	CCN3	Ccn3	4.69855	76
C	ZFP36	Zfp36	10.9263	56
C	CAVIN2	Cavin2	18.27	82
C	PTGES3	Ptges3	47.841	55
C	AR	Ar	2.16881	285
C	MIB1	Mib1	4.15721	98
C	IER5	Ier5	11.5199	81
C	PIK3R1	Pik3r1	8.49233	105
C	FBXL22	Fbxl22	3.37473	116
C	OSR1	Osr1	1.86304	57
C	GDF6	Gdf6	0.42461	93
C	F2R	F2r	7.45952	91
C	LMOD1	Lmod1	3.60447	118
C	ITGB6	Itgb6	2.49027	51
C	RCAN1	Rcan1	7.91812	67
C	HIP1	Hip1	2.36931	51
C	IER2	Ier2	22.1552	51
C	CAVIN1	Cavin1	28.3003	87
C	KCNA5	Kcna5	0.66298	80
C	TGFBR2	Tgfbr2	4.65124	138
C	BMYC	Bmyc	13.6764	53
C	ITGA1	Itga1	3.69557	223
C	LOXL1	Loxl1	5.70033	90
C	RASD1	Rasd1	2.82383	57
C	RGS7BP	Rgs7bp	2.48336	184
C	EPHA3	Epha3	0.77363	65
C	MFAP4	Mfap4	10.6042	54
C	JUNB	Junb	26.0436	51
C	NR1D1	Nr1d1	12.6569	71
C	GAS1	Gas1	6.46193	64
C	AGTR1A	Agtr1a	2.44063	51
C	SOX4	Sox4	13.4205	115
C	PXN	Pxn	12.1342	50
C	RHOB	Rhob	23.5575	56
C	KLF2	Klf2	38.9571	56
C	ROCK1	Rock1	10.2423	55
C	ACTN4	Actn4	44.325	109
C	AGTR1B	Agtr1b	0.11019	54
C	Ep300	Ep300	6.29082	110
C	PDLIM1	Pdlim1	20.8975	52
C	GJA1	Gja1	21.1557	83
C	MAPK1	Mapk1	13.1804	74
C	GPC3	Gpc3	5.68262	60
C	CEBPB	Cebpb	20.6331	49
C	YES1	Yes1	3.49444	59
C	BMP4	Bmp4	2.49274	54
C	ACTG2	Actg2	73.2538	50
C	CAV3	Cav3	5.61911	53
C	JAG2	Jag2	2.64766	57
C	PDGFA	Pdgfa	8.19531	52
C	TSPAN7	Tspan7	48.5734	54
C	EFNA5	Efna5	2.06929	94
C	AIRN	Airn	2.25026	59
C	TNFRSF11B	Tnfrsf11b	0.90484	78
C	NOTCH2	Notch2	2.98328	268
C	LTBP3	Ltbp3	4.62162	75
C	SH3PXD2A	Sh3pxd2a	5.28968	217
C	COL18A1	Col18a1	7.20886	59
C	CD36	Cd36	14.6906	84
C	CRIP2	Crip2	65.7917	51
C	ATP1A2	Atp1a2	15.4377	82
C	COL5A2	Col5a2	4.98204	132
C	YAP1	Yap1	6.90626	117
C	HSPA1A	Hspa1a	6.78383	67
C	ADAMTS10	Adamts10	5.52825	125
C	HTRA3	Htra3	7.10008	55
C	NOTCH3	Notch3	2.99201	211
C	COL3A1	Col3a1	48.3723	126
C	GPC6	Gpc6	1.13822	60
C	TCF15	Tcf15	1.57089	40
C	ZFP148	Zfp148	3.42855	57
C	ITGB1	Itgb1	47.4596	84
C	MYH11	Myh11	21.3447	195
C	PTPRZ1	Ptprz1	1.22854	169
C	ZBTB16	Zbtb16	1.88426	82
C	CCND1	Ccnd1	51.0364	84
C	SERPINH1	Serpinh1	23.975	67
C	CLDN3	Cldn3	52.184	52
C	SELENOM	Selenom	40.3456	53
C	JUND	Jund	68.5155	58
C	ABI3BP	Abi3bp	3.01414	94
C	MAFF	Maff	3.62554	50
C	MBNL1	Mbnl1	20.1251	60
C	THBD	Thbd	10.1947	111
C	ARRDC3	Arrdc3	8.56414	118
C	FIBIN	Fibin	3.26838	63
C	HSPA5	Hspa5	116.351	69
C	ABCC9	Abcc9	1.86945	215
C	SOD3	Sod3	11.4952	112
C	EBF1	Ebf1	6.14759	75
C	FLNC	Flnc	4.22417	274
C	MYH10	Myh10	6.58426	223
C	AEBP1	Aebp1	5.93459	52
C	PECAM1	Pecam1	14.4934	101
C	DSTN	Dstn	203.867	58
C	CLTC	Cltc	19.2635	176
C	DCN	Dcn	102.697	55
C	FBLIM1	Fblim1	8.60403	84
C	ACTG1	Actg1	280.028	69
C	UBE2D3	Ube2d3	47.1759	70
C	JUN	Jun	16.006	88
C	KLF4	Klf4	37.5766	67
C	COL15A1	Col15a1	6.00452	52
C	SPARC	Sparc	144.06	65
C	IRF1	Irf1	16.4982	67
C	FBLN1	Fbln1	11.6867	66
C	NR3C2	Nr3c2	1.57943	162
C	LGMN	Lgmn	22.3214	56
C	PTK2	Ptk2	4.19046	130
C	GDF15	Gdf15	0.86782	62
C	TAGLN2	Tagln2	123.542	52
C	ARHGDIB	Arhgdib	71.6528	54
C	RBP4	Rbp4	117.428	52
C	CRIM1	Crim1	5.32792	65
C	LTBP1	Ltbp1	2.59172	110
C	NR4A2	Nr4a2	4.05303	65
C	CXCL12	Cxcl12	9.84308	55
C	ADGRF5	Adgrf5	2.96527	87
C	KCNJ15	Kcnj15	3.63225	147
C	KLF7	Klf7	5.19673	183
C	FLNA	Flna	15.7604	270
C	FSTL1	Fstl1	17.0055	105
C	ITGB5	Itgb5	9.07774	51
C	PLXNA4	Plxna4	1.07587	364
C	PRDM6	Prdm6	0.55396	61
C	CAV1	Cav1	14.3603	79
C	TES	Tes	12.1443	64
C	CDH13	Cdh13	3.70941	54
C	POSTN	Postn	8.27076	81
C	MSN	Msn	35.8943	98
C	NPNT	Npnt	3.92318	83
C	SKIL	Skil	4.16986	158
C	ACVRL1	Acvrl1	4.51252	56
C	LTBP4	Ltbp4	9.64452	136
C	PALLD	Palld	10.8384	119
C	FRMD5	Frmd5	0.80944	69
C	GATA4	Gata4	3.71728	72
C	IGF1	Igf1	6.66695	54
C	JMJD6	Jmjd6	11.8244	65
C	ITGA6	Itga6	24.3859	51
C	RGS2	Rgs2	12.9402	73
C	SKI	Ski	7.84486	128
C	HOTAIRM1	Hotairm1	18.5523	34
C	PIEZO2	Piezo2	0.84068	55
C	YWHAQ	Ywhaq	48.886	52
C	ADAMTS9	Adamts9	0.5546	50
C	MMP12	Mmp12	0.29211	32
C	ADGRL1	Adgrl1	5.63184	58
C	SVIL	Svil	3.13323	175
C	MEG3	Meg3	11.2659	58
C	TXNIP	Txnip	269.4	47
C	MMP9	Mmp9	11.1376	51
C	MAP1LC3A	Map1lc3a	40.1089	65
C	CTTNBP2	Cttnbp2	0.88505	124
C	ECM1	Ecm1	101.574	33
C	PLCB4	Plcb4	3.30616	62
C	E030013I19RIK	E030013I19Rik	0.18961	54
C	MFAP5	Mfap5	6.00201	56
C	PRDX1	Prdx1	122.203	56
C	MYOCD	Myocd	0.40351	54
C	HTRA1	Htra1	16.1072	51
C	OPTC	Optc	0.63352	59
C	RGS3	Rgs3	4.18752	56
C	HSPG2	Hspg2	4.20607	63
C	PIEZO1	Piezo1	2.74787	58
C	MYC	Myc	2.67566	59
C	FILIP1L	Filip1l	12.7341	99
C	VCAN	Vcan	0.86965	65
C	ZMIZ1	Zmiz1	10.1168	54
C	NEDD9	Nedd9	3.50898	121
C	IFRD1	Ifrd1	29.2018	33
C	PKIG	Pkig	28.2197	60
C	EGR1	Egr1	5.75796	83
C	BCAR1	Bcar1	7.06577	92
C	WWP2	Wwp2	6.37312	50
C	CORIN	Corin	0.47485	137
C	ENG	Eng	5.5836	98
C	TGFB1I1	Tgfb1i1	2.95655	52
C	GDF10	Gdf10	1.0986	145
C	TNS1	Tns1	6.08367	298
C	DDR2	Ddr2	2.01702	249
C	LRRC10B	Lrrc10b	1.46736	57
C	PACSIN2	Pacsin2	6.21282	109
C	BMP6	Bmp6	2.4601	68
C	HSPA1B	Hspa1b	14.6165	41
C	RBM38	Rbm38	12.9643	55
C	NEAT1	Neat1	78.7437	88
C	CCN2	Ccn2	5.26376	64
C	BDNF	Bdnf	0.3619	100
C	TMEM215	Tmem215	0.30719	58
C	AGRN	Agrn	9.32073	166
C	CARMN	Carmn	1.03473	57
C	BVHT	Bvht	10.9866	43
C	DUBR	Dubr	1.28609	59
C	FN1	Fn1	8.05509	150
C	LY6A	Ly6a	91.1714	43
C	HMGN3	Hmgn3	8.2034	34
C	NCAM1	Ncam1	4.93941	78
C	TGFB2	Tgfb2	5.20456	30
C	PCDH9	Pcdh9	0.66153	180
C	PDCL3	Pdcl3	16.7049	41
C	MEF2C	Mef2c	6.09099	108
C	FGF2	Fgf2	1.00434	132
C	ZYX	Zyx	26.5727	76
C	CREBBP	Crebbp	27.6086	45
C	ACAN	Acan	0.50283	77
C	ADAM9	Adam9	4.20717	115
C	IRF3	Irf3	11.3381	32
C	PPP1R15A	Ppp1r15a	59.2421	30
C	MMP2	Mmp2	14.5257	58
C	CDKN2D	Cdkn2d	12.5833	56
C	GM34829	Gm34829	0.17916	53
C	CSK	Csk	28.631	57
C	ARID5B	Arid5b	3.60664	115
C	SBNO2	Sbno2	6.58262	70
C	ITGA7	Itga7	4.7928	54
C	PPP1R12A	Ppp1r12a	9.48163	66
C	CSRP2	Csrp2	29.8534	52
C	GM48228	Gm48228	1.78763	33
C	FBLN5	Fbln5	4.32297	72
C	SORBS1	Sorbs1	5.61281	41
C	PSD	Psd	5.1336	57
C	PCGF5	Pcgf5	2.68629	124
C	ITGB7	Itgb7	58.2525	41
C	VAPA	Vapa	22.9547	57
C	SH3BGR	Sh3bgr	24.8328	41
C	MAP3K4	Map3k4	2.90194	150
C	PIM1	Pim1	27.2345	52
C	EFEMP2	Efemp2	2.49134	53
C	DUSP1	Dusp1	18.8676	51
C	TNXB	Tnxb	1.93756	366
C	MYLK4	Mylk4	3.5319	158
