# Supplementary material for: Intrinsic Gata4 expression sensitizes the aortic root to dilation in a Loeys-Dietz syndrome mouse model
Source: Research Square preprint supplement (doi:10.21203/rs.3.rs-4420617/v1), 2024-06-05
Supplement: Supplementary file 13 [file Supplemental_Table 4.xlsx]

## Sheet: VSMC1.cluster_def_markers_mus
Supplemental Table 4.
List of cluster-defining transcripts for VSMC1 (this tab) and VSMC2 subcluster (next tab) . CoGAPS Pattern 4 and Pattern 5 gene lists, and EnrichR results for CoGAPS patterns are shown in subsequent tabs.
	p_val	avg_log2FC	pct.1	pct.2	p_val_adj
Sost	0	2.59946	0.948	0.435	0
Ncam1	0	2.31105	0.879	0.368	0
Postn	0	2.16087	0.865	0.419	0
Sgcg	0	2.09216	0.849	0.354	0
Eln	0	1.88569	0.944	0.578	0
AC154546.2	1.34146e-05	3.95378	0.012	0.001	0.268091
Aebp1	0	1.74619	0.948	0.631	0
Nupr1	0	1.57887	0.934	0.618	0
Cd6	2.91009e-05	3.72866	0.011	0.001	0.581582
Mfap4	0	1.49809	0.948	0.558	0
Npnt	0	1.31933	0.957	0.754	0
Zfp984	9.66238e-05	3.51986	0.01	0.001	1
Pam	0	1.3125	0.998	0.936	0
Cpe	0	1.06199	1	0.977	0
Itga8	0	1.05047	0.986	0.892	0
Crip1	0	-1.17338	0.99	0.997	0
Mustn1	0	-1.32664	0.879	0.978	0
Tfap2b	0.000306324	3.32774	0.01	0.001	1
Tmem176b	0	-2.21859	0.166	0.628	0
Palld	0	-2.72208	0.484	0.862	0
C1s1	0	-2.82712	0.134	0.59	0
Enpep	0	-3.08256	0.11	0.567	0
Col8a1	0	-3.1468	0.054	0.36	0
Pln	0	-3.26169	0.157	0.534	0
Olfr328	3.15845e-05	3.08685	0.012	0.001	0.631217
Gja4	0	-3.96173	0.041	0.393	0
Thbs1	0	-4.00648	0.052	0.55	0
Pgam2	0	-4.40746	0.034	0.405	0
Olfr558	0	-10.5216	0	0.174	0
Dnah7b	0.000154174	3.0196	0.012	0.002	1
Fhl2	2.88891e-304	-2.26548	0.192	0.578	5.77348e-300
Nr2f2	9.78957e-287	-2.07799	0.399	0.752	1.95645e-282
Tmem229b	0.000262409	2.93623	0.012	0.002	1
Adra1a	1.69341e-05	2.90689	0.014	0.002	0.338429
Gm14964	1.41253e-05	2.90464	0.018	0.004	0.282293
Gpr4	0.00019928	2.90128	0.013	0.003	1
Tmem215	3.4716e-285	-3.73336	0.019	0.236	6.93798e-281
Notch3	2.19147e-266	-3.0063	0.08	0.377	4.37965e-262
Pcdh7	2.15165e-264	0.999953	0.977	0.838	4.30008e-260
Sncg	7.04247e-261	-3.32926	0.065	0.34	1.40744e-256
Osr1	6.55936e-258	2.42399	0.625	0.157	1.31089e-253
Naalad2	2.68498e-241	-3.22865	0.029	0.243	5.36594e-237
Scube1	6.1599e-05	2.78595	0.012	0.002	1
Tmem176a	1.30453e-238	-2.57306	0.067	0.336	2.6071e-234
Sod3	2.96185e-238	1.1891	0.913	0.678	5.91925e-234
Gng11	5.89793e-234	-1.76819	0.327	0.673	1.1787e-229
Col18a1	7.8591e-227	1.07924	0.937	0.781	1.57064e-222
Ckb	2.203e-221	-1.56006	0.6	0.837	4.4027e-217
Cpxm2	4.52238e-220	-3.17957	0.041	0.261	9.03797e-216
Col15a1	9.01605e-220	1.88851	0.65	0.223	1.80186e-215
Mrps6	6.05152e-217	-1.52758	0.44	0.753	1.2094e-212
Sorbs2	7.07136e-212	-2.40798	0.533	0.733	1.41321e-207
Ndrg1	1.83054e-210	-1.83292	0.252	0.583	3.65834e-206
St5	8.97369e-207	1.05211	0.893	0.613	1.79339e-202
Corin	2.23855e-206	-2.54091	0.074	0.326	4.47375e-202
Mylk4	2.42274e-201	2.62462	0.529	0.135	4.84184e-197
Hes1	7.66847e-201	-2.08432	0.272	0.594	1.53254e-196
Ier2	2.36858e-200	-1.05199	0.54	0.843	4.7336e-196
Rab9b	0.000277112	2.54642	0.011	0.002	1
Gadd45b	3.4352e-198	-1.64401	0.389	0.694	6.86524e-194
Isl1	7.63873e-06	2.51912	0.022	0.006	0.15266
Cdh18	5.19124e-06	2.49619	0.019	0.004	0.103747
Sept11	1.97493e-197	-1.91229	0.198	0.514	3.94689e-193
Tsc22d3	2.36818e-195	-2.26139	0.164	0.462	4.73281e-191
Trim2	2.01342e-192	-2.34271	0.087	0.34	4.02382e-188
Tes	1.05132e-190	3.04813	0.459	0.078	2.10106e-186
S1pr3	2.31815e-190	-5.80096	0.002	0.113	4.63281e-186
4930417O22Rik	8.71219e-06	2.46566	0.019	0.004	0.174113
Npr1	1.5918e-189	3.06283	0.465	0.086	3.18122e-185
Pcolce	6.16931e-189	-2.24215	0.185	0.481	1.23294e-184
C1ra	4.78022e-187	-1.93263	0.168	0.462	9.55327e-183
Pmepa1	1.62873e-184	0.685414	0.992	0.942	3.25502e-180
Ctsd	6.16855e-182	0.788773	0.948	0.836	1.23278e-177
Rasd1	2.42098e-181	-3.15664	0.035	0.221	4.83832e-177
Slc24a4	0.000454483	2.40495	0.011	0.002	1
Fmo2	8.05043e-179	0.841965	0.945	0.619	1.60888e-174
Cfh	9.28296e-177	-1.16498	0.708	0.899	1.8552e-172
B430010I23Rik	4.28401e-06	2.36649	0.017	0.003	0.085616
Dsp	1.60772e-176	2.6394	0.466	0.1	3.21303e-172
Ly6g6d	4.83149e-06	2.3451	0.021	0.005	0.0965574
Ftl1	8.07509e-176	-0.9931	0.828	0.929	1.61381e-171
Junb	1.87527e-175	-0.877919	0.699	0.935	3.74773e-171
Ntn4	2.85498e-173	-2.36088	0.103	0.351	5.70569e-169
Ctsb	4.60864e-171	0.771225	0.945	0.842	9.21036e-167
Ier3	1.77697e-168	-1.34016	0.434	0.715	3.55127e-164
Id3	2.84845e-164	-1.03597	0.929	0.971	5.69263e-160
Sertad1	8.89816e-163	-1.47581	0.34	0.636	1.7783e-158
Mybpc2	5.53451e-05	2.26937	0.016	0.003	1
Mkx	1.79813e-161	-4.42783	0.005	0.11	3.59357e-157
Lpl	2.85591e-161	-3.26234	0.033	0.2	5.70754e-157
Egr1	3.23349e-161	-0.969024	0.642	0.897	6.46213e-157
Cd93	6.80261e-157	-3.80387	0.013	0.141	1.3595e-152
Emb	6.13362e-156	2.42301	0.468	0.129	1.2258e-151
Mhrt	0.00365351	2.23381	0.01	0.003	1
Ptprz1	8.176e-156	2.01645	0.552	0.217	1.63397e-151
Vtcn1	4.0124e-05	2.19974	0.014	0.002	0.801877
Spsb4	6.12662e-06	2.19169	0.024	0.007	0.12244
Rcor2	0.000367461	2.17985	0.015	0.005	1
mt-Co3	3.68544e-155	0.510507	1	1	7.36536e-151
Ppp1r15a	9.51127e-155	-1.33475	0.471	0.741	1.90083e-150
A630023A22Rik	0.000376896	2.1414	0.012	0.003	1
Tdrp	4.01232e-06	2.13106	0.022	0.006	0.0801862
Sypl2	0.000228891	2.09761	0.013	0.003	1
Nkain2	0.000218926	2.09248	0.012	0.002	1
Gxylt2	2.29875e-154	1.71059	0.515	0.152	4.59406e-150
Krt8	0.000233863	2.09085	0.014	0.003	1
Dlx6os1	0.000383379	2.0863	0.012	0.003	1
Nlrp10	0.000773094	2.08175	0.011	0.002	1
Chrna1	3.96886e-05	2.07576	0.015	0.003	0.793177
2210010C04Rik	0.00179917	2.07039	0.011	0.003	1
2210407C18Rik	2.63865e-154	2.5628	0.427	0.087	5.27335e-150
Pdlim4	7.86614e-154	2.05007	0.506	0.159	1.57205e-149
Rab33a	0.000258537	2.06431	0.015	0.004	1
Itga9	7.203e-153	1.16678	0.766	0.477	1.43952e-148
Kcna5	1.10754e-152	-4.03574	0.009	0.123	2.21341e-148
Myh10	5.88132e-152	1.23936	0.75	0.47	1.17538e-147
1190005I06Rik	4.38815e-151	1.41306	0.662	0.344	8.76972e-147
3110079O15Rik	6.38978e-06	2.04249	0.018	0.003	0.1277
Celf2	1.60015e-150	1.13025	0.729	0.38	3.1979e-146
Apoe	1.8375e-150	-2.67256	0.279	0.534	3.67224e-146
Nov	9.29426e-150	0.706119	0.976	0.862	1.85746e-145
Hoxaas3	1.11355e-05	2.02682	0.018	0.004	0.222542
Gucy2g	2.60408e-147	-4.45239	0.006	0.109	5.20425e-143
Pgf	3.42479e-147	-3.96277	0.011	0.126	6.84445e-143
Crim1	1.9986e-146	-1.44263	0.424	0.665	3.99419e-142
Rtn4rl1	3.49838e-146	-2.81035	0.03	0.185	6.99152e-142
Gprc5c	1.04167e-145	-5.02139	0.002	0.09	2.08177e-141
Bicc1	2.14393e-144	-3.1786	0.023	0.163	4.28465e-140
Msx1	6.46243e-144	-2.07576	0.133	0.372	1.29152e-139
D830026I12Rik	0.000611704	1.96239	0.015	0.005	1
Psap	1.08975e-142	0.634596	0.974	0.929	2.17787e-138
Ptchd4	0.000106	1.95548	0.013	0.002	1
Tbxas1	0.000336801	1.95012	0.012	0.002	1
C77080	0.00109463	1.94641	0.014	0.005	1
Igfbp4	1.96295e-142	-1.44916	0.441	0.693	3.92295e-138
Cped1	6.63187e-142	0.666851	0.973	0.894	1.32538e-137
Prdm6	7.35415e-140	2.34361	0.423	0.104	1.46973e-135
Hoxb5	0.000659611	1.9115	0.01	0.002	1
Gm49322	0.000968513	1.90971	0.012	0.003	1
Mfap5	2.40018e-139	1.25316	0.637	0.294	4.79677e-135
Gm16485	0.00355665	1.89827	0.011	0.003	1
Dlx6	0.000531334	1.88939	0.018	0.007	1
Sparc	1.92686e-138	0.510127	0.995	0.989	3.85083e-134
Pkig	1.18767e-137	-0.956702	0.686	0.841	2.37356e-133
Bgn	7.07366e-136	0.447415	0.999	0.99	1.41367e-131
Tmsb4x	1.12887e-135	0.511995	1	0.995	2.25604e-131
Ubb	2.49127e-135	-0.440598	0.996	0.999	4.97881e-131
Pik3r6	8.53544e-05	1.86908	0.017	0.005	1
Gucy1a1	6.34495e-135	-0.9469	0.756	0.883	1.26804e-130
Gm17218	5.05997e-05	1.85549	0.016	0.003	1
Rbm20	3.80819e-05	1.85213	0.026	0.01	0.761066
Unc5d	0.00029754	1.85196	0.016	0.005	1
Shisa4	7.18026e-134	1.18328	0.698	0.417	1.43498e-129
Ndufa4l2	1.65266e-132	-5.03333	0.009	0.112	3.30285e-128
Sh3bgr	7.40559e-131	0.774719	0.889	0.773	1.48001e-126
Htra1	9.66355e-131	1.0621	0.83	0.657	1.93126e-126
Cdkn2c	5.68025e-130	-1.84462	0.11	0.329	1.1352e-125
Htra3	4.27392e-129	1.29701	0.526	0.185	8.54143e-125
Prrx1	8.75604e-129	-1.37936	0.288	0.552	1.74989e-124
Cdh13	2.90111e-127	1.10431	0.716	0.437	5.79787e-123
Tmem51	1.17016e-126	-2.1615	0.078	0.27	2.33857e-122
Col1a2	5.07996e-126	0.477561	0.941	0.784	1.01523e-121
Nr4a1	6.80498e-125	-1.05152	0.503	0.75	1.35998e-120
Slc6a7	1.21699e-05	1.80463	0.025	0.009	0.243215
Limch1	1.08361e-124	1.71862	0.495	0.186	2.16559e-120
Calm2	1.40227e-122	-0.55123	0.972	0.981	2.80243e-118
Map2	1.20784e-120	-2.81529	0.027	0.158	2.41387e-116
Hspb6	1.83978e-119	0.784731	0.892	0.75	3.67679e-115
Actn1	4.0158e-119	0.475115	0.989	0.957	8.02557e-115
H3f3b	1.0059e-118	-0.525784	0.991	0.997	2.0103e-114
Pcdh1	4.06228e-118	-5.19033	0.003	0.078	8.11847e-114
Bex4	1.23224e-117	-2.22039	0.115	0.315	2.46263e-113
Eif2c5	0.00502628	1.76857	0.011	0.004	1
Serpinf1	2.28732e-117	-2.5145	0.176	0.398	4.57121e-113
Gdf10	4.72476e-117	-2.39858	0.049	0.208	9.44242e-113
Gm16701.1	2.47944e-05	1.75433	0.021	0.006	0.495516
mt-Cytb	5.37426e-117	0.421129	1	1	1.07405e-112
Thsd4	7.6096e-117	1.90597	0.467	0.182	1.52078e-112
Mlf1	1.66488e-116	-2.1894	0.068	0.243	3.32725e-112
Epb41	2.86176e-116	-1.63985	0.174	0.403	5.71922e-112
Tmem44	0.0105235	1.73495	0.01	0.003	1
Ifitm3	9.22882e-116	-0.831367	0.794	0.889	1.84438e-111
Ptger3	5.07973e-115	-4.47768	0.004	0.081	1.01518e-110
Egr2	9.09252e-115	-2.45761	0.024	0.147	1.81714e-110
Epas1	4.71608e-114	-1.12583	0.368	0.628	9.42508e-110
E030013I19Rik	6.74504e-114	1.2004	0.68	0.425	1.348e-109
Hspa8	2.70308e-113	-0.608459	0.977	0.99	5.4021e-109
Serf2	5.48582e-113	0.429553	0.989	0.989	1.09634e-108
Aspn	2.17421e-112	-1.04688	0.472	0.716	4.34517e-108
Ccdc65	6.27756e-05	1.69409	0.015	0.003	1
Nid1	2.26339e-112	-2.57763	0.032	0.165	4.52339e-108
Phactr3	1.35175e-05	1.68254	0.023	0.007	0.270147
Igsf9	0.0131551	1.68202	0.011	0.005	1
Gm15998	0.00273169	1.68153	0.01	0.003	1
Flrt3	8.46821e-06	1.67512	0.028	0.01	0.169237
Fgf7	8.12665e-112	-3.04675	0.019	0.131	1.62411e-107
Pde1a	1.27278e-111	-1.73106	0.14	0.352	2.54365e-107
Zfp108	0.00454615	1.66166	0.011	0.004	1
mt-Nd4	1.9929e-111	0.430159	1	0.999	3.98281e-107
Tmem25	3.20797e-05	1.65896	0.018	0.005	0.641112
Higd1b	8.1984e-111	-7.72881	0.001	0.061	1.63845e-106
Rspo1	1.09123e-110	-6.0173	0.001	0.065	2.18082e-106
Frmd8os	0.00518466	1.63973	0.012	0.005	1
Lrtm2	0.000467808	1.63802	0.011	0.002	1
Dnah5	0.00277597	1.63485	0.015	0.006	1
Wwp2	2.37537e-110	1.26792	0.608	0.332	4.74718e-106
Prex1	0.00277333	1.6287	0.015	0.006	1
Slc22a1	4.74071e-110	1.12251	0.675	0.415	9.47431e-106
Nxph3	0.00872743	1.61002	0.01	0.003	1
Gm13861	4.85029e-110	-2.69729	0.058	0.216	9.69331e-106
Ccdc3	1.00743e-109	-1.05955	0.543	0.737	2.01335e-105
Dgkb	2.34282e-108	-1.79888	0.112	0.309	4.68212e-104
Cbr2	3.88548e-108	0.856844	0.781	0.534	7.76513e-104
Prss23	8.71684e-108	-0.924283	0.731	0.861	1.74206e-103
Farp1	3.21102e-107	-2.99255	0.015	0.116	6.41722e-103
Adamts1	4.12837e-107	-1.32666	0.386	0.622	8.25056e-103
Kif26b	1.1602e-05	1.57436	0.03	0.011	0.231866
Kcnq5	0.000592583	1.55957	0.018	0.007	1
Hotairm1	3.96356e-106	1.9464	0.382	0.11	7.92117e-102
Pbxip1	4.34818e-105	0.548217	0.964	0.905	8.68985e-101
Rap1a	5.77043e-105	-0.821715	0.75	0.837	1.15322e-100
Sgcd	2.98466e-104	1.32368	0.546	0.269	5.96485e-100
Dmpk	3.33267e-104	0.865974	0.78	0.596	6.66035e-100
Lamp1	6.05824e-104	0.431881	0.986	0.963	1.21074e-99
Nrip2	8.75062e-104	-4.5119	0.007	0.086	1.74881e-99
Pkp4	3.28111e-103	1.08367	0.67	0.429	6.55731e-99
Selenop	4.80067e-103	0.41866	0.883	0.675	9.59413e-99
Abca8a	1.4621e-102	-3.5292	0.018	0.12	2.92201e-98
Ptma	5.50466e-102	-0.386912	0.993	0.999	1.10011e-97
Slc5a3	8.4697e-102	-1.67661	0.121	0.317	1.69267e-97
Alx1	4.0829e-05	1.51473	0.03	0.012	0.815967
Aldh1l1	0.00965593	1.50789	0.01	0.003	1
Gm32036	7.00108e-05	1.50297	0.024	0.009	1
Wisp1	9.43258e-102	-2.32422	0.031	0.154	1.8851e-97
Sbspon	1.79498e-101	-2.44506	0.053	0.2	3.58726e-97
Srpx	5.87811e-101	-3.23623	0.018	0.121	1.17474e-96
Tmem26	2.93849e-05	1.49135	0.028	0.011	0.587258
Cnn3	1.59093e-99	0.769658	0.811	0.618	3.17947e-95
Klf4	4.03983e-99	-1.06545	0.315	0.556	8.07359e-95
Ltbp4	4.4062e-99	0.552329	0.96	0.8	8.80579e-95
Aqp11	0.00131423	1.47979	0.015	0.006	1
Cygb	1.19144e-98	-3.60002	0.054	0.195	2.38109e-94
Susd2	4.80542e-98	-2.01786	0.087	0.257	9.60363e-94
Hoxa1	9.11523e-06	1.46943	0.023	0.007	0.182168
Ppfia4	0.00290585	1.46832	0.018	0.009	1
Rcn3	6.8623e-97	0.621289	0.892	0.79	1.37143e-92
Gm10516	0.00820023	1.46782	0.011	0.004	1
Jun	1.82026e-96	-0.624041	0.821	0.901	3.63779e-92
Gm15721	0.00146892	1.46333	0.01	0.002	1
Rpusd2	0.00558289	1.4591	0.011	0.004	1
mt-Atp6	8.99116e-95	0.405383	1	0.999	1.79688e-90
Gm8113	0.00401905	1.45881	0.014	0.006	1
Gm21987	0.00401774	1.45609	0.015	0.006	1
Klf2	1.42495e-94	-0.804527	0.426	0.669	2.84777e-90
Arc	2.22458e-94	-2.1643	0.035	0.158	4.44582e-90
Syt3	0.00381163	1.44164	0.012	0.004	1
D430036J16Rik	1.60568e-05	1.43342	0.021	0.006	0.320896
Flna	2.26476e-94	0.483447	0.994	0.974	4.52612e-90
Ebf1	2.49568e-94	-0.729007	0.787	0.897	4.98761e-90
Eif1	1.12475e-93	-0.264944	0.999	1	2.24782e-89
Reep5	1.1624e-93	0.591482	0.887	0.789	2.32306e-89
Hoxa2	3.08257e-06	1.42619	0.031	0.011	0.0616051
Cox8a	1.30077e-93	-0.445664	0.958	0.98	2.59959e-89
Fam198b	2.08881e-93	0.917594	0.693	0.441	4.17448e-89
Cdh4	0.0046847	1.42144	0.012	0.005	1
Sema3d	3.28838e-93	2.05704	0.329	0.084	6.57182e-89
Cited2	8.45021e-93	-1.22189	0.336	0.556	1.68877e-88
Alkal2	1.56262e-92	-6.44216	0.001	0.055	3.1229e-88
Tns1	2.93008e-92	0.635515	0.926	0.837	5.85577e-88
Dusp1	3.88379e-92	-0.517684	0.806	0.919	7.76175e-88
Fbln5	6.27189e-92	0.597621	0.957	0.847	1.25344e-87
Cd34	1.37824e-91	-1.82276	0.099	0.272	2.75442e-87
Tcf21	4.6024e-91	-2.91018	0.04	0.164	9.19789e-87
Trpm3	0.00056383	1.39716	0.019	0.007	1
Myadml2	0.0002104	1.39659	0.021	0.008	1
Aqp1	4.64951e-91	1.87891	0.337	0.092	9.29205e-87
Zfp36	2.64212e-90	-0.773346	0.477	0.719	5.28028e-86
Serpine2	1.69102e-89	0.634859	0.963	0.915	3.3795e-85
Mapt	6.69606e-05	1.38023	0.028	0.011	1
Csrp2	2.50447e-89	0.393682	0.999	0.994	5.00519e-85
Gja1	2.83759e-89	1.84534	0.388	0.144	5.67093e-85
Qsox1	5.90666e-89	0.844126	0.749	0.563	1.18045e-84
Ier5	9.10744e-89	-0.875505	0.455	0.653	1.82012e-84
mt-Nd5	1.1889e-88	0.623608	0.909	0.826	2.37602e-84
Scube3	2.62008e-88	1.26833	0.529	0.278	5.23623e-84
Alcam	3.49813e-88	1.46793	0.414	0.158	6.99101e-84
Dusp3	8.90676e-88	0.697416	0.87	0.731	1.78002e-83
Nav2	3.15116e-87	1.3908	0.486	0.236	6.2976e-83
Nrap	0.00256176	1.35438	0.015	0.006	1
Atp6v1a	8.88708e-87	1.00791	0.65	0.428	1.77608e-82
Igfbp5	1.32352e-86	-2.57321	0.113	0.283	2.64505e-82
mt-Co2	1.88548e-86	0.397035	1	1	3.76812e-82
Gm45184	0.00621423	1.35256	0.015	0.007	1
Cdo1	3.52334e-86	1.36576	0.448	0.197	7.04139e-82
Pigz	0.000413555	1.32879	0.023	0.01	1
Ramp1	6.63223e-86	0.59171	0.882	0.791	1.32545e-81
Dkk3	7.22962e-86	1.00099	0.575	0.315	1.44484e-81
Scn7a	2.07841e-85	-3.83035	0.007	0.077	4.1537e-81
Adk	2.17714e-85	0.873239	0.699	0.471	4.35102e-81
Fosb	1.10108e-84	-0.679866	0.273	0.522	2.2005e-80
Bmp2	1.40899e-84	-1.81602	0.087	0.245	2.81587e-80
Tnfsf9	2.41693e-84	-2.50551	0.039	0.157	4.83024e-80
Creb5	3.08359e-84	1.54491	0.398	0.154	6.16256e-80
Zfp773	0.00535738	1.31427	0.013	0.005	1
Tob1	3.21666e-84	-1.07691	0.517	0.678	6.42849e-80
Ston2	4.37934e-05	1.31115	0.028	0.011	0.875211
Irf1	7.11251e-84	-1.76314	0.131	0.311	1.42143e-79
Ccdc152	0.00204977	1.30643	0.02	0.009	1
Tbx2	1.83161e-83	-2.05605	0.069	0.214	3.66048e-79
Gm26724	4.15951e-06	1.30429	0.04	0.018	0.0831278
Wnt16	1.04722e-82	1.47593	0.445	0.207	2.09286e-78
Adam11	0.00448187	1.29953	0.013	0.005	1
Mt1	1.23292e-82	0.549995	0.912	0.701	2.46399e-78
Tuba1a	2.43308e-82	-0.966295	0.564	0.718	4.86251e-78
Ltbp1	3.51565e-82	0.727106	0.795	0.631	7.02603e-78
Cdc42ep3	4.03349e-82	-0.858611	0.695	0.798	8.06093e-78
Zc3h12b	7.87934e-06	1.29591	0.046	0.023	0.157469
Lims1	1.55674e-81	-0.983743	0.407	0.601	3.11114e-77
Ddx5	2.97445e-81	-0.440278	0.953	0.969	5.94444e-77
Zfp991	0.0246193	1.2858	0.011	0.005	1
Cds1	0.00094075	1.28325	0.023	0.011	1
Fbxw10	6.79809e-05	1.27989	0.032	0.015	1
Actg1	4.57216e-81	-0.315157	0.999	0.998	9.13745e-77
Rhoc	6.62748e-81	0.437612	0.955	0.917	1.3245e-76
Asah2	0.0156299	1.26807	0.012	0.006	1
Gm13889	6.63173e-81	-0.708171	0.804	0.887	1.32535e-76
Itgb1	6.67772e-81	0.322939	0.998	0.994	1.33454e-76
Dmd	9.21267e-81	0.757094	0.825	0.697	1.84115e-76
Lum	1.0492e-80	-1.89055	0.211	0.394	2.09683e-76
Fxyd6	2.36285e-80	-1.91272	0.044	0.165	4.72216e-76
Dpt	4.32166e-80	-3.16282	0.052	0.176	8.63683e-76
Nudt10	0.00108884	1.24472	0.025	0.012	1
Ccnd1	4.53989e-80	-2.36084	0.04	0.155	9.07297e-76
Gm8797	5.31681e-80	-0.539578	0.871	0.943	1.06256e-75
Col1a1	7.79811e-80	0.335652	0.93	0.756	1.55845e-75
Lrrfip1	1.65764e-79	0.527409	0.909	0.812	3.31279e-75
Bend5	0.000549465	1.24077	0.018	0.007	1
Ptp4a3	2.74698e-79	-1.10719	0.532	0.686	5.48984e-75
Slc9a2	0.00010344	1.23789	0.029	0.012	1
Kcnq3	0.0322242	1.23702	0.011	0.005	1
Slc26a6	0.00206605	1.23509	0.02	0.009	1
Fos	4.09315e-79	-0.37248	0.781	0.952	8.18015e-75
Rimklb	0.000873977	1.23385	0.017	0.006	1
Gm12840	4.24856e-79	-1.27292	0.572	0.711	8.49074e-75
Ky	0.000676302	1.22975	0.027	0.013	1
Daam2	7.92659e-79	-2.68633	0.019	0.107	1.58413e-74
Ece2	0.0108749	1.22847	0.01	0.004	1
Ppm1l	9.45767e-79	-2.87278	0.019	0.107	1.89012e-74
App	1.60785e-78	0.55134	0.912	0.85	3.2133e-74
Emc10	3.38898e-78	0.634847	0.811	0.67	6.77288e-74
Trim7	5.23822e-06	1.22085	0.048	0.024	0.104686
Rarres1	3.60461e-78	-2.10312	0.062	0.195	7.20382e-74
Tnni3k	0.00462698	1.21564	0.025	0.014	1
Fmn1	0.000272518	1.21513	0.029	0.014	1
Ndp	0.00118714	1.21307	0.018	0.007	1
Prrx2	0.0608119	1.20832	0.048	0.039	1
Vim	9.13372e-78	0.363686	1	0.998	1.82537e-73
Eml5	0.00197411	1.20357	0.019	0.009	1
Parm1	1.03932e-77	-1.73074	0.101	0.258	2.07709e-73
Gm20594	0.00735214	1.20312	0.01	0.003	1
Msrb1	1.70906e-77	0.689792	0.818	0.71	3.41555e-73
Col4a6	4.95723e-77	1.38015	0.454	0.224	9.90702e-73
Plk2	9.61355e-77	-1.55902	0.074	0.22	1.92127e-72
Ltk	0.0120099	1.20001	0.01	0.004	1
Cnn1	2.56822e-76	0.369134	0.988	0.954	5.13259e-72
Olfr78	2.57329e-76	-6.6205	0.001	0.043	5.14273e-72
Gm15867	2.63687e-76	-2.14016	0.034	0.141	5.26978e-72
Cyr61	8.2635e-76	-0.540424	0.643	0.832	1.65146e-71
Slc46a3	0.0303658	1.19579	0.01	0.005	1
Lrrc17	1.06123e-75	1.61454	0.363	0.14	2.12086e-71
Itpk1	1.07137e-75	-1.29386	0.227	0.415	2.14112e-71
Acta1	3.16791e-75	-5.55202	0.002	0.052	6.33106e-71
Nhlrc1	1.13028e-05	1.18731	0.037	0.016	0.225886
Gas6	3.22827e-75	0.358339	0.883	0.702	6.4517e-71
Ogn	1.45996e-74	-0.668906	0.847	0.887	2.91773e-70
Hspg2	3.89656e-74	0.800178	0.757	0.575	7.78728e-70
Slc23a1	0.0147243	1.18091	0.011	0.005	1
Perm1	0.000169961	1.18076	0.018	0.006	1
Colec12	6.71152e-74	0.553129	0.856	0.68	1.3413e-69
Tigd5	0.000114991	1.1793	0.021	0.007	1
Myo1b	6.75584e-74	-5.64945	0.001	0.043	1.35015e-69
Shd	0.00853595	1.17296	0.015	0.007	1
Optc	7.79735e-74	1.02195	0.604	0.39	1.5583e-69
Gpm6b	9.27615e-74	-3.19404	0.011	0.082	1.85384e-69
Gm21083	0.00981173	1.16221	0.01	0.003	1
Fn3k	0.0309593	1.16203	0.013	0.007	1
Bend4	0.000294006	1.16016	0.024	0.01	1
Kcnj15	1.10449e-73	2.29503	0.252	0.056	2.20732e-69
Dhrs11	7.93631e-06	1.15671	0.038	0.016	0.158607
Sytl5	0.000253473	1.15611	0.022	0.009	1
Nebl	0.000162618	1.15466	0.039	0.02	1
H2afz	1.28027e-73	-0.658962	0.781	0.868	2.55861e-69
Diras2	0.000134524	1.1506	0.027	0.012	1
Zfp709	0.00713038	1.1477	0.013	0.006	1
Atpif1	1.33169e-73	-0.669248	0.812	0.871	2.66138e-69
Col19a1	0.000116182	1.1467	0.035	0.017	1
Cnksr1	0.0278956	1.14596	0.01	0.005	1
Sertad4	1.39075e-73	-2.46737	0.02	0.106	2.77941e-69
4732414G09Rik	0.00310447	1.14263	0.024	0.012	1
Suclg2	1.65115e-73	1.08028	0.541	0.312	3.29983e-69
Msn	9.06441e-73	0.504304	0.918	0.838	1.81152e-68
Lbhd1	0.0131143	1.13907	0.015	0.007	1
Apol7d	0.008551	1.13628	0.015	0.007	1
Rbp1	2.98429e-72	0.428	0.966	0.817	5.96411e-68
Cth	0.00661775	1.13331	0.017	0.008	1
Prelp	3.14827e-72	0.557919	0.79	0.58	6.29182e-68
Ngf	6.22312e-72	-5.14972	0.002	0.048	1.24369e-67
Dcn	7.23846e-72	-2.67983	0.439	0.596	1.44661e-67
Rab26	0.000736764	1.12916	0.017	0.006	1
Mamdc2	9.28769e-72	-2.26967	0.039	0.146	1.85615e-67
Rpl27a	1.11498e-71	-0.411248	0.952	0.98	2.22829e-67
Gm34829	1.30699e-71	-4.25876	0.003	0.053	2.61202e-67
Hspb1	1.61968e-71	-0.854148	0.948	0.952	3.23693e-67
Lmcd1	1.90181e-71	0.676164	0.803	0.657	3.80076e-67
Pnrc1	6.42293e-71	-0.573958	0.823	0.888	1.28362e-66
Ebf2	7.61417e-71	-4.73761	0.002	0.047	1.52169e-66
Ier5l	2.85374e-70	-1.13608	0.178	0.361	5.70319e-66
Abcc10	0.00680192	1.11914	0.019	0.01	1
Nudt12	9.24167e-05	1.11008	0.027	0.011	1
Ndst3	0.00444181	1.10633	0.016	0.007	1
Fblim1	4.73882e-70	0.463263	0.95	0.87	9.47053e-66
Hspb7	2.08948e-69	0.837924	0.668	0.493	4.17582e-65
Clu	3.16523e-69	0.51943	0.948	0.856	6.3257e-65
Rnf152	5.6705e-69	-2.54372	0.021	0.105	1.13325e-64
Ltbp3	1.06847e-68	0.887513	0.653	0.455	2.13534e-64
Id2	1.1308e-68	-0.848528	0.635	0.76	2.2599e-64
Zeb2	1.75494e-68	-1.3238	0.292	0.478	3.50724e-64
Serping1	4.25461e-68	-1.10706	0.667	0.762	8.50284e-64
Gm7160	0.0271891	1.09645	0.014	0.007	1
Dnajc28	0.00781012	1.09548	0.012	0.005	1
Nox4	5.25463e-68	0.816709	0.606	0.38	1.05014e-63
Gm15445	0.00887042	1.09362	0.01	0.003	1
Shroom4	0.00118287	1.09169	0.019	0.008	1
Pparg	0.0031542	1.08738	0.019	0.009	1
Tnfrsf21	0.000330764	1.08654	0.019	0.007	1
6720427I07Rik	0.0142888	1.08462	0.018	0.01	1
Limd1	1.00702e-67	-1.03667	0.272	0.466	2.01252e-63
Itm2b	1.98526e-67	-0.323239	0.996	0.997	3.96754e-63
Ccdc42os	0.0119413	1.08018	0.02	0.011	1
Zcchc18	1.20698e-05	1.08015	0.036	0.015	0.241216
Rbpms	2.22049e-67	0.326196	0.994	0.989	4.43764e-63
Ano1	4.00617e-67	1.80237	0.293	0.094	8.00632e-63
Osbpl3	4.18333e-67	1.66042	0.328	0.126	8.36039e-63
Raph1	6.7053e-67	-1.33739	0.154	0.321	1.34005e-62
Rnd3	9.58941e-67	-0.99595	0.371	0.554	1.91644e-62
Fibin	9.61306e-67	1.00661	0.601	0.396	1.92117e-62
Tpd52l1	1.84186e-66	2.21594	0.244	0.059	3.68095e-62
Tgfb3	3.53511e-66	-1.24746	0.326	0.5	7.06492e-62
Pde10a	3.77421e-66	-3.095	0.009	0.072	7.54276e-62
Dgkg	1.45815e-65	-2.48858	0.02	0.1	2.9141e-61
Rflnb	2.19798e-65	-2.26502	0.032	0.126	4.39267e-61
Cfl2	2.2755e-65	0.45143	0.926	0.858	4.54758e-61
Dstn	3.11968e-65	0.229404	1	0.999	6.23469e-61
St3gal5	3.46054e-65	1.22946	0.413	0.2	6.91589e-61
Myoz2	8.229e-65	3.38252	0.179	0.019	1.64457e-60
Btg2	1.26219e-64	-0.416273	0.798	0.914	2.5225e-60
Gipc3	0.00574845	1.042	0.018	0.009	1
Wasf1	0.0240089	1.03299	0.013	0.007	1
Nanos3	0.00713313	1.03232	0.013	0.005	1
S100a8	0.632581	1.03136	0.011	0.01	1
Atf3	1.28524e-64	-0.733375	0.514	0.689	2.56856e-60
Ms4a4d	1.32907e-64	-3.97275	0.005	0.058	2.65615e-60
Icam1	3.23647e-64	-3.0847	0.017	0.092	6.46808e-60
Xpr1	3.77938e-64	1.09776	0.481	0.267	7.55309e-60
Ddit4	4.95452e-64	-1.43442	0.084	0.218	9.90161e-60
Adcy1	1.31797e-63	2.52672	0.227	0.053	2.63396e-59
Adcy7	2.48435e-63	1.79934	0.275	0.086	4.96497e-59
Kcnj12	2.77365e-63	-3.18804	0.007	0.064	5.54313e-59
Cp	3.99853e-63	-1.49313	0.095	0.234	7.99107e-59
Gpx3	8.21729e-63	-3.06328	0.048	0.154	1.64223e-58
Rpa1	9.60761e-63	-1.36401	0.15	0.309	1.92008e-58
Gnai1	1.25105e-62	0.693693	0.724	0.551	2.50021e-58
Krt18	1.33713e-62	3.37378	0.188	0.029	2.67225e-58
Astn2	2.26323e-05	1.01577	0.046	0.024	0.452307
Zbtb20	2.34566e-62	0.445144	0.943	0.875	4.68779e-58
Camk2d	2.67065e-62	0.623722	0.798	0.651	5.33729e-58
Id1	1.15677e-61	-0.851814	0.501	0.671	2.3118e-57
Faim2	0.0511264	1.01179	0.014	0.008	1
Tbx20	1.37769e-61	-1.41081	0.111	0.258	2.75331e-57
Alox12	0.000868423	1.00829	0.023	0.011	1
Hspa1l	0.000982791	1.00808	0.039	0.023	1
G0s2	2.29477e-61	-3.13854	0.011	0.073	4.5861e-57
Cxcl12	2.70155e-61	0.391619	0.503	0.256	5.39905e-57
Ntng1	0.000922863	1.00725	0.035	0.02	1
Gata4	2.80135e-61	-1.42509	0.089	0.224	5.59851e-57
F13a1	0.0403336	1.00441	0.013	0.007	1
Gpr20	8.24692e-61	-4.31693	0.003	0.048	1.64815e-56
Hoxa3	8.80692e-61	1.87595	0.25	0.072	1.76006e-56
Macrod2	1.355e-05	1.0008	0.044	0.022	0.270796
Nrarp	1.1536e-60	-4.38441	0.003	0.047	2.30546e-56
Gm9951	0.000345681	0.999344	0.034	0.018	1
Atm	6.38462e-06	0.997783	0.056	0.03	0.127597
2700046G09Rik	0.0111066	0.992831	0.01	0.004	1
Emc8	1.29433e-60	0.745663	0.662	0.474	2.58671e-56
Nrk	0.0140148	0.991753	0.013	0.006	1
Sema3c	1.31228e-60	1.94056	0.264	0.084	2.62258e-56
Lxn	1.73591e-60	-1.20566	0.303	0.467	3.46923e-56
Slc10a6	3.37559e-60	-1.84611	0.053	0.163	6.74612e-56
Efna5	7.67934e-60	0.809492	0.577	0.362	1.53472e-55
mt-Nd3	1.00537e-59	0.47362	0.951	0.901	2.00924e-55
Ankrd23	0.00122108	0.978143	0.015	0.005	1
Ace	1.06107e-59	1.10589	0.402	0.192	2.12055e-55
Aacs	2.62096e-06	0.976886	0.056	0.029	0.0523798
Ddx11	0.0779128	0.976272	0.01	0.006	1
Efna4	0.0027756	0.975942	0.01	0.003	1
Pdlim7	2.243e-59	0.395916	0.935	0.88	4.48264e-55
Aplp2	3.11838e-59	0.419135	0.936	0.875	6.23208e-55
Skap2	3.75248e-59	1.24338	0.365	0.163	7.49932e-55
Lurap1	0.000150368	0.973558	0.042	0.023	1
Med12l	0.0178074	0.9725	0.014	0.007	1
Ccl21a	0.549727	0.971503	0.021	0.024	1
Plxdc2	4.81551e-59	0.67276	0.499	0.263	9.6238e-55
Mafb	7.54357e-59	-1.40241	0.071	0.192	1.50758e-54
Kbtbd12	0.0611228	0.968847	0.015	0.009	1
Nucb1	7.81473e-59	0.730613	0.688	0.526	1.56177e-54
Tnnt3	0.0517656	0.96738	0.013	0.007	1
Slc46a1	0.015639	0.966115	0.023	0.014	1
Alox5ap	0.000217731	0.963047	0.034	0.017	1
Cdkn1a	9.70878e-59	-1.0985	0.278	0.449	1.9403e-54
Chd3	1.13017e-58	1.18743	0.407	0.208	2.25864e-54
Acat3	0.0644542	0.959915	0.01	0.005	1
Slc11a1	2.0389e-58	-3.3551	0.01	0.068	4.07473e-54
Eef1a2	0.0261088	0.957326	0.017	0.01	1
Ppara	0.0226512	0.956042	0.017	0.01	1
Ppm1h	4.01327e-06	0.954814	0.064	0.036	0.0802051
2310002D06Rik	0.0457046	0.951636	0.012	0.006	1
Samd10	1.25675e-05	0.949343	0.038	0.017	0.251161
Celsr2	0.000387379	0.947121	0.027	0.012	1
Abcg1	0.0497867	0.943707	0.01	0.005	1
Dlc1	2.40008e-58	-0.956243	0.289	0.47	4.79656e-54
Cd81	6.27783e-58	0.265927	0.999	0.997	1.25462e-53
Cenpo	0.00358734	0.936366	0.018	0.009	1
mt-Nd1	8.12299e-58	0.314335	0.999	0.997	1.62338e-53
Plcb4	9.02736e-58	0.479455	0.844	0.688	1.80412e-53
Afap1l2	1.09527e-57	-3.62825	0.005	0.052	2.18891e-53
Socs3	1.18728e-57	-0.607891	0.26	0.454	2.37278e-53
H2afx	1.26857e-57	-1.23219	0.159	0.314	2.53524e-53
Steap4	2.38011e-57	-3.39817	0.008	0.061	4.75665e-53
D2hgdh	0.00180315	0.930985	0.022	0.011	1
Park2	0.00038933	0.929969	0.04	0.023	1
Rab6b	0.000142374	0.928478	0.023	0.009	1
Fhl1	3.40203e-57	0.326361	0.994	0.98	6.79895e-53
Rfx2	0.000329604	0.919565	0.041	0.023	1
Zbtb39	0.00715593	0.919278	0.02	0.011	1
Adamtsl1	3.76623e-57	-1.76414	0.021	0.097	7.52681e-53
Ccdc173	0.00142621	0.917258	0.037	0.022	1
Zfp428	0.023681	0.916101	0.021	0.012	1
Soga1	3.02064e-05	0.915003	0.051	0.028	0.603674
Sgo2a	0.0120157	0.91464	0.017	0.009	1
Tceal5	1.72221e-05	0.913666	0.064	0.037	0.344184
Dnaja1	4.28186e-57	-0.716655	0.661	0.763	8.5573e-53
Ramp2	4.41558e-57	-2.80455	0.016	0.085	8.82453e-53
Nrp2	0.000336689	0.910727	0.035	0.019	1
Kcnt2	1.38905e-56	-1.65883	0.054	0.16	2.77602e-52
Errfi1	1.42352e-56	-0.84111	0.639	0.761	2.8449e-52
B230312C02Rik	0.0325032	0.909359	0.014	0.007	1
Itgb5	2.37761e-56	0.510221	0.84	0.718	4.75165e-52
Capn9	0.0194548	0.908555	0.011	0.005	1
Chst3	1.3686e-05	0.907217	0.064	0.037	0.273514
Gm26808	0.091319	0.90618	0.01	0.006	1
Tuba1b	3.05669e-56	-0.669136	0.592	0.725	6.1088e-52
Tubg2	0.0297401	0.9051	0.011	0.005	1
Lrrtm3	0.101619	0.904951	0.012	0.007	1
Nrtn	3.65658e-56	1.52304	0.318	0.133	7.30767e-52
Ctsh	4.66262e-56	0.833436	0.512	0.302	9.31824e-52
Ociad2	4.89216e-56	-3.32626	0.008	0.061	9.77698e-52
Gm26873	0.048945	0.901232	0.014	0.009	1
Pdlim3	5.65152e-56	-0.47878	0.904	0.919	1.12946e-51
Kif21a	0.0265789	0.898579	0.013	0.007	1
Emp1	5.68918e-56	-1.7629	0.066	0.178	1.13698e-51
Oas1c	0.0153705	0.896704	0.018	0.01	1
Tpx2	0.0919264	0.896516	0.016	0.011	1
Slc38a1	1.05028e-55	1.83002	0.249	0.082	2.09898e-51
Pamr1	1.49147e-55	1.79962	0.263	0.093	2.98071e-51
Ccdc60	0.000461644	0.893582	0.033	0.018	1
Prkar1a	1.68359e-55	-0.470023	0.894	0.932	3.36466e-51
Gm29107	0.0218554	0.889869	0.013	0.006	1
Exoc6	6.96809e-06	0.889111	0.075	0.045	0.139257
Synm	3.82507e-55	-1.13037	0.209	0.368	7.64439e-51
Zbtb7c	4.02103e-55	-2.27241	0.016	0.082	8.03602e-51
Fam241b	0.0192961	0.885941	0.021	0.012	1
Alms1	0.0026579	0.885861	0.044	0.028	1
Tmsb10	4.49208e-55	-0.796018	0.759	0.835	8.97742e-51
Zfp661	0.174289	0.883925	0.012	0.008	1
Ildr2	4.30009e-54	-3.53592	0.004	0.048	8.59373e-50
Flrt1	0.000968056	0.88106	0.026	0.013	1
Zfp985	0.0265821	0.879289	0.013	0.007	1
P2ry14	0.00913993	0.878887	0.018	0.01	1
Susd4	0.00469615	0.878401	0.015	0.006	1
Gale	0.00231853	0.878355	0.024	0.012	1
Myh6	0.0932187	0.878123	0.011	0.006	1
Rin3	0.000242079	0.878065	0.041	0.023	1
Rasd2	3.05496e-06	0.877287	0.033	0.012	0.0610534
Nr4a2	5.45768e-54	-1.55653	0.134	0.275	1.09072e-49
Rgs11	0.00500463	0.876562	0.02	0.01	1
Cgref1	3.89459e-05	0.875448	0.051	0.028	0.778334
Slc12a7	0.00060554	0.87427	0.036	0.02	1
Hbegf	6.62229e-54	-1.14228	0.254	0.416	1.32347e-49
Ttll5	2.20423e-05	0.871289	0.051	0.028	0.440514
Efhc2	3.34333e-05	0.868479	0.047	0.025	0.668164
Gm47547	0.000397948	0.866901	0.03	0.015	1
Tmsb15b1	0.00343033	0.866786	0.027	0.015	1
Sdc3	7.67347e-54	-1.25944	0.103	0.236	1.53354e-49
Neil1	0.00178562	0.865519	0.031	0.018	1
Psme2b	0.00559589	0.864731	0.015	0.006	1
Gal3st3	1.00054e-53	2.38216	0.193	0.043	1.99957e-49
Serpinb1a	1.41022e-53	-2.18301	0.025	0.103	2.81832e-49
Esam	2.05643e-53	-1.35475	0.113	0.247	4.10978e-49
Gm17477	0.00733418	0.860804	0.021	0.011	1
Foxo6	5.30794e-05	0.859325	0.031	0.014	1
B630019A10Rik	0.0189023	0.857489	0.014	0.007	1
P4ha3	2.47502e-53	-2.69929	0.01	0.066	4.94633e-49
Chn2	3.38093e-53	-2.46466	0.014	0.077	6.7568e-49
Tmem47	4.92743e-53	0.568073	0.729	0.568	9.84747e-49
Bdnf	5.58929e-53	1.79202	0.244	0.081	1.11702e-48
Chek2	0.00116179	0.852407	0.028	0.014	1
AL591952.3	0.0472679	0.850763	0.019	0.012	1
Nfkbia	6.275e-53	-0.802473	0.562	0.689	1.25406e-48
Tmem154	0.0112107	0.848566	0.01	0.004	1
Cst6	0.0542043	0.846999	0.01	0.005	1
Gm10645	0.109301	0.846797	0.012	0.007	1
Mamstr	0.0169396	0.846726	0.013	0.006	1
Pex11a	0.00821135	0.846664	0.022	0.012	1
Dtx1	0.0277183	0.845849	0.01	0.005	1
Tbc1d16	1.50647e-05	0.844813	0.066	0.039	0.301068
Fbxo27	0.000203873	0.844599	0.046	0.027	1
Rbp4	8.90355e-53	0.278744	0.491	0.265	1.77937e-48
Btg1	3.15404e-52	-0.516178	0.799	0.871	6.30336e-48
Notch1	3.2273e-52	-2.06	0.026	0.104	6.44977e-48
Snai1	4.2263e-52	-2.40212	0.014	0.074	8.44625e-48
Rsad1	0.00344451	0.842315	0.037	0.023	1
Zfp872	0.0089205	0.842213	0.015	0.007	1
Igfbp3	5.50656e-52	-3.98022	0.012	0.07	1.10049e-47
Cald1	1.09826e-51	-0.305693	0.996	0.997	2.19487e-47
Gm9780	0.0327391	0.839971	0.014	0.007	1
Ankrd13b	0.000158236	0.838729	0.04	0.022	1
Srp54c	0.0222932	0.838171	0.016	0.009	1
Clec3b	3.94974e-51	-2.79113	0.082	0.192	7.89356e-47
Colca2	0.155999	0.835845	0.01	0.007	1
Myoz1	0.000318791	0.835504	0.025	0.011	1
Hyal1	6.79209e-06	0.835042	0.07	0.041	0.13574
Brip1	4.71847e-51	2.25407	0.191	0.044	9.42986e-47
Gm26910	0.0353665	0.833347	0.013	0.007	1
mt-Nd2	6.27986e-51	0.329364	0.998	0.995	1.25503e-46
Dnajb1	7.19134e-51	-1.02657	0.272	0.432	1.43719e-46
Cmya5	0.02401	0.831293	0.023	0.014	1
Fam84a	8.80404e-51	2.23406	0.199	0.051	1.75949e-46
Top3a	0.0128341	0.827496	0.019	0.01	1
Cpq	1.26944e-50	0.626509	0.716	0.564	2.53698e-46
Atp1b2	1.81385e-50	-1.00803	0.285	0.441	3.62498e-46
Itm2a	4.8403e-50	-2.14371	0.023	0.094	9.67334e-46
Ctcflos	0.0935136	0.823204	0.012	0.007	1
Klhl11	0.00562103	0.820503	0.026	0.015	1
9430037G07Rik	0.0141246	0.818503	0.019	0.011	1
Nxnl2	5.14955e-50	-2.64861	0.011	0.065	1.02914e-45
Lgr6	5.2659e-50	1.12217	0.412	0.234	1.05239e-45
Focad	0.00937845	0.815944	0.036	0.024	1
Dap	5.31851e-50	0.655515	0.664	0.503	1.06291e-45
Ch25h	5.36917e-50	-3.23024	0.006	0.052	1.07303e-45
Slc38a7	4.68022e-06	0.812595	0.062	0.034	0.0935342
Rhpn2	0.000981532	0.810921	0.025	0.012	1
Dpep1	7.03768e-50	-2.96624	0.027	0.102	1.40648e-45
Nat10	4.63998e-05	0.808709	0.072	0.046	0.9273
Gng7	0.0122967	0.808276	0.018	0.01	1
Tbx3	1.08265e-49	-2.46984	0.014	0.074	2.16367e-45
Wdr95	0.000122625	0.806985	0.054	0.032	1
Oaf	1.54448e-49	-1.66824	0.06	0.163	3.08664e-45
Sugct	0.000189223	0.805353	0.034	0.017	1
Slc25a26	4.18042e-06	0.80464	0.056	0.029	0.0835456
Lbh	2.08073e-49	-0.669358	0.608	0.734	4.15835e-45
Saxo2	0.000894913	0.802672	0.029	0.015	1
Cycs	2.2437e-49	-0.605436	0.692	0.777	4.48404e-45
Sept7	2.73517e-49	-0.380082	0.948	0.972	5.46623e-45
Tmem204	5.09747e-49	-1.50055	0.067	0.172	1.01873e-44
Scn2a	1.1295e-05	0.798613	0.078	0.048	0.22573
Tmem119	5.13333e-49	-2.92425	0.016	0.077	1.0259e-44
Sh3bp5	5.49901e-49	-2.9692	0.01	0.061	1.09898e-44
Gm45871	0.0216502	0.796183	0.028	0.019	1
Serpina3n	5.50258e-49	-2.02339	0.033	0.114	1.09969e-44
Tspan5	5.91077e-49	1.19861	0.347	0.171	1.18127e-44
Ptges3l	6.63271e-49	-1.04492	0.23	0.38	1.32555e-44
Tmc4	0.00945474	0.792422	0.031	0.019	1
H2al1k	0.0459906	0.791812	0.01	0.005	1
Cd276	0.00482594	0.791082	0.029	0.017	1
Abca8b	6.87105e-49	-3.47915	0.004	0.043	1.37318e-44
Fam19a1	6.96679e-49	4.02513	0.134	0.012	1.39231e-44
Uba2	8.40724e-49	-0.815931	0.665	0.75	1.68019e-44
Ephb3	0.00185849	0.787964	0.04	0.024	1
Fam185a	0.000205788	0.786408	0.047	0.027	1
Gramd1c	0.00158424	0.786097	0.023	0.011	1
Slmap	9.65857e-49	0.383227	0.931	0.869	1.93026e-44
Dclk1	1.48609e-48	-2.15512	0.028	0.103	2.96995e-44
Trpc6	1.78585e-48	-7.81398	0	0.026	3.56901e-44
Rhoq	1.78782e-48	0.807826	0.535	0.354	3.57297e-44
Usp2	2.42251e-48	-2.15206	0.036	0.119	4.84139e-44
Auts2	2.71547e-48	0.645363	0.658	0.481	5.42687e-44
Zfp36l2	3.52572e-48	-0.5958	0.582	0.716	7.04616e-44
Hmgb2	6.94345e-48	-1.1907	0.165	0.307	1.38765e-43
Arl4c	0.000217721	0.778278	0.036	0.019	1
S100a1	7.33631e-48	0.603554	0.698	0.564	1.46616e-43
Fbxo30	7.34648e-48	1.03045	0.465	0.293	1.46819e-43
Rftn1	8.06316e-48	-1.63852	0.057	0.155	1.61142e-43
Hexim1	1.22459e-47	-1.20543	0.123	0.254	2.44735e-43
Art3	1.4908e-47	-1.10689	0.166	0.31	2.97937e-43
Gm15952	0.0422322	0.776326	0.014	0.008	1
Slc9b2	0.00524223	0.775794	0.029	0.018	1
Lrrc75b	0.0286687	0.775589	0.017	0.01	1
Myo18b	8.65575e-05	0.775431	0.059	0.036	1
Aff2	1.95126e-05	0.774773	0.078	0.049	0.38996
Lpp	1.64958e-47	0.352371	0.963	0.932	3.29669e-43
Piezo2	0.00440318	0.774628	0.033	0.02	1
Txlnb	0.00250922	0.774544	0.031	0.018	1
Psat1	0.121645	0.774359	0.017	0.012	1
E530011L22Rik	0.0125	0.774358	0.024	0.014	1
Gm45187	0.268248	0.77263	0.011	0.009	1
Pnp	2.43469e-47	-1.08534	0.261	0.407	4.86573e-43
Csrp1	2.98353e-47	-0.333324	0.991	0.988	5.96258e-43
Slc25a33	6.56313e-05	0.770406	0.064	0.04	1
Lin7b	0.00661971	0.769939	0.02	0.011	1
Ppp1r10	3.68764e-47	-1.05414	0.274	0.423	7.36975e-43
Brd2	3.98424e-47	-0.663332	0.523	0.655	7.9625e-43
Spred3	0.00902953	0.768567	0.036	0.024	1
Ttll12	6.90307e-05	0.768217	0.07	0.045	1
Stk10	8.3603e-05	0.767814	0.057	0.034	1
Lrrc27	0.00394256	0.767524	0.025	0.014	1
Cd82	4.70072e-47	-1.35826	0.093	0.209	9.39438e-43
Ifit3b	0.351468	0.766683	0.011	0.014	1
Bcl2	5.78908e-47	0.905753	0.48	0.301	1.15695e-42
Podn	6.57953e-47	-3.01711	0.013	0.069	1.31492e-42
Osbpl6	0.000753037	0.765834	0.041	0.024	1
Slc24a3	1.27398e-46	1.53797	0.239	0.086	2.54605e-42
Chrnb1	1.11574e-05	0.763098	0.059	0.032	0.22298
Polr3a	0.00145285	0.762568	0.054	0.036	1
Vcan	1.65609e-46	1.51542	0.242	0.089	3.30969e-42
Tcf19	0.000388555	0.762089	0.045	0.026	1
Itln1	0.00144496	0.761895	0.033	0.019	1
Ermp1	0.000119209	0.760977	0.071	0.047	1
Gda	1.75682e-46	-3.34941	0.005	0.046	3.511e-42
Mmp15	0.0626219	0.758268	0.015	0.009	1
Trp53bp1	3.54196e-05	0.757836	0.07	0.044	0.707861
9030624G23Rik	0.10412	0.757589	0.017	0.012	1
Net1	2.09273e-46	-0.998865	0.302	0.455	4.18231e-42
Gria3	0.0370553	0.756925	0.027	0.019	1
Trpc3	2.31509e-46	-3.42879	0.003	0.04	4.6267e-42
Rassf4	1.38836e-05	0.755794	0.078	0.048	0.277464
Olfml3	2.85922e-46	-2.49637	0.021	0.087	5.71415e-42
Tmem35a	0.000572021	0.755134	0.04	0.023	1
Serpinb6b	3.0638e-46	1.02007	0.399	0.224	6.12301e-42
Epb41l5	0.000152339	0.754355	0.043	0.024	1
Ptgis	4.57276e-46	0.291058	0.984	0.922	9.13866e-42
Gm47689	0.00467625	0.75413	0.023	0.012	1
Rbpms2	8.52016e-46	-0.713497	0.588	0.685	1.70275e-41
Sox6	2.00307e-45	-1.40844	0.067	0.168	4.00313e-41
Flywch2	0.0001445	0.751293	0.074	0.049	1
Slc2a10	3.17214e-05	0.750678	0.078	0.05	0.633952
Elmo3	0.193591	0.747708	0.013	0.009	1
Trim63	0.0223611	0.747492	0.016	0.009	1
Hoxb3os	3.45409e-45	1.2601	0.278	0.116	6.903e-41
Ipp	0.0181563	0.746052	0.033	0.023	1
Cmbl	4.32846e-45	-1.93946	0.039	0.121	8.65044e-41
Gadd45g	5.28592e-45	-0.722974	0.699	0.768	1.05639e-40
1700056E22Rik	0.11616	0.74366	0.013	0.009	1
Bmpr1b	5.86549e-45	2.70766	0.151	0.028	1.17222e-40
Stk35	1.04147e-05	0.743418	0.061	0.035	0.208139
Neurl1b	5.9091e-45	-4.26606	0.002	0.035	1.18093e-40
Fabp4	6.54631e-45	0.354786	0.482	0.292	1.30828e-40
Arl10	0.000412839	0.742273	0.053	0.033	1
Napepld	6.72364e-45	1.20554	0.333	0.164	1.34372e-40
Rexo2	8.73763e-45	0.377363	0.888	0.829	1.74622e-40
Aox1	0.000103356	0.74086	0.055	0.033	1
Col4a5	8.81285e-45	0.728226	0.561	0.387	1.76125e-40
4930522L14Rik	0.0012931	0.740158	0.035	0.02	1
Ptn	1.06235e-44	-2.81196	0.015	0.071	2.1231e-40
Tmem206	0.00844585	0.739247	0.027	0.016	1
Clmp	6.71401e-05	0.739159	0.075	0.048	1
Galnt6	1.55588e-44	3.97578	0.124	0.012	3.10943e-40
Napb	0.00366215	0.735739	0.033	0.02	1
Gstm6	0.140387	0.734549	0.018	0.013	1
AC162302.1	0.0401844	0.734338	0.01	0.005	1
Gm11423	0.00786264	0.733859	0.025	0.015	1
Pdgfc	6.15994e-06	0.733422	0.089	0.057	0.123106
Mmp16	0.0049014	0.731398	0.053	0.037	1
Ngb	1.89153e-44	-2.46781	0.013	0.066	3.78023e-40
Col6a1	1.91443e-44	0.53316	0.628	0.421	3.82598e-40
Cabcoco1	0.0269538	0.730425	0.015	0.008	1
Arid3b	0.00762772	0.730251	0.025	0.015	1
Tbx3os1	3.52372e-44	-4.96553	0.002	0.032	7.04215e-40
Jpt2	0.000233905	0.729217	0.05	0.029	1
Col6a2	4.43216e-44	0.723987	0.542	0.358	8.85767e-40
Gfra2	4.85263e-44	-2.25957	0.019	0.079	9.69798e-40
Fbf1	0.00232937	0.727436	0.04	0.025	1
Dpy19l3	0.000879881	0.727196	0.047	0.029	1
Ednra	6.23092e-44	-1.89607	0.039	0.12	1.24525e-39
Cep85	0.00712697	0.726155	0.033	0.02	1
Foxf1	7.50185e-44	2.47032	0.155	0.032	1.49924e-39
Pgpep1l	0.12284	0.725517	0.016	0.011	1
Ptger4	9.64629e-44	-2.71412	0.007	0.049	1.92781e-39
Cdkl5	1.03493e-43	1.76472	0.22	0.078	2.06831e-39
Pfkfb3	0.000129503	0.723156	0.084	0.057	1
Chst10	0.100815	0.722832	0.015	0.01	1
Gdpgp1	0.0543063	0.721401	0.018	0.011	1
Adora1	0.0317466	0.720779	0.013	0.007	1
Gpr27	0.000145835	0.720641	0.039	0.02	1
mt-Nd4l	1.20167e-43	0.35586	0.956	0.901	2.40154e-39
Adam33	1.21072e-43	1.18374	0.33	0.167	2.41962e-39
Actc1	1.99147e-43	-3.31491	0.004	0.041	3.97995e-39
Irf5	0.0294311	0.716031	0.015	0.009	1
Sipa1l3	0.0602535	0.715046	0.031	0.023	1
Lmod1	2.09068e-43	0.2897	0.97	0.939	4.17823e-39
S100b	2.30898e-43	-2.75613	0.008	0.053	4.61449e-39
Mmp9	0.0280024	0.714743	0.016	0.009	1
Pex1	0.00295952	0.714525	0.033	0.02	1
Pear1	2.7152e-43	-1.55066	0.055	0.147	5.42632e-39
Man1a	2.80421e-43	-2.0293	0.027	0.096	5.60422e-39
2310015D24Rik	0.00414326	0.713457	0.05	0.034	1
Lipt1	0.00301512	0.713419	0.028	0.016	1
Fli1	2.93767e-05	0.712239	0.075	0.048	0.587093
Lrrc56	0.118529	0.712187	0.022	0.016	1
Socs1	2.93285e-43	-1.04571	0.14	0.271	5.8613e-39
Hs3st1	3.74379e-43	-2.65855	0.009	0.056	7.48196e-39
Slc36a3os	0.0400304	0.710037	0.015	0.009	1
Asph	3.8138e-43	0.607494	0.7	0.571	7.62188e-39
Svil	3.85782e-43	0.562369	0.737	0.604	7.70986e-39
Smad9	0.000740153	0.708023	0.057	0.037	1
Ankrd1	5.61339e-43	-2.22597	0.109	0.219	1.12184e-38
Cabp1	6.42335e-43	-3.00592	0.006	0.048	1.28371e-38
Galnt16	6.44784e-43	1.1275	0.32	0.157	1.2886e-38
B4galt6	7.30869e-06	0.706014	0.101	0.067	0.146064
Chchd2	6.84065e-43	-0.260831	0.971	0.981	1.3671e-38
Prr5l	0.0127029	0.703961	0.018	0.01	1
Pcdhgb4	0.0180557	0.703473	0.011	0.005	1
Fbxo5	0.0980537	0.702935	0.017	0.011	1
Zfhx2	0.00348181	0.702678	0.027	0.015	1
Nptxr	2.29377e-05	0.701777	0.105	0.073	0.45841
Wsb1	7.35609e-43	-0.760923	0.343	0.495	1.47011e-38
Cand2	0.0239975	0.698889	0.03	0.02	1
Degs1	1.30709e-42	0.509495	0.784	0.663	2.61222e-38
Abhd2	1.64489e-42	-1.00841	0.27	0.412	3.28732e-38
Tbc1d22b	0.000159594	0.697816	0.043	0.024	1
Hopx	2.15408e-42	-4.06742	0.004	0.04	4.30494e-38
Alpk2	0.00760586	0.697114	0.015	0.007	1
Ralgps1	0.0357166	0.6966	0.028	0.019	1
Ddah1	2.32772e-42	-3.97415	0.003	0.035	4.65195e-38
Ovca2	0.0996026	0.696239	0.01	0.006	1
Thada	0.102378	0.696055	0.026	0.02	1
Phldb2	4.79938e-42	-0.806289	0.377	0.516	9.59156e-38
Epb41l4b	0.0674835	0.695482	0.016	0.01	1
Itih5	7.89357e-42	-2.50983	0.012	0.061	1.57753e-37
Rpn2	1.22129e-41	0.501953	0.747	0.611	2.44074e-37
Isyna1	1.24752e-41	-0.888231	0.374	0.508	2.49317e-37
Ifi27l2b	0.14195	0.693116	0.013	0.009	1
Igsf9b	1.65433e-41	1.32685	0.293	0.141	3.30619e-37
Epha4	0.00646185	0.693038	0.038	0.025	1
Enpp6	1.65874e-41	-2.65899	0.01	0.056	3.31498e-37
Fuk	8.67461e-05	0.690682	0.051	0.029	1
Lmo4	1.80618e-41	0.33964	0.861	0.744	3.60964e-37
Tmtc2	2.63063e-41	1.84967	0.198	0.065	5.2573e-37
Cyp7b1	2.74409e-41	-3.60631	0.004	0.037	5.48407e-37
Snhg10	0.00743288	0.688419	0.027	0.016	1
Chpf2	0.000331226	0.687822	0.1	0.074	1
Lsamp	3.97666e-41	-2.81299	0.005	0.043	7.94735e-37
Meox2	3.98217e-41	-2.99189	0.008	0.051	7.95837e-37
Pnpla7	0.0545841	0.686146	0.015	0.009	1
Gm26722	4.5705e-41	0.931654	0.396	0.231	9.13414e-37
Nfix	5.81324e-41	0.320969	0.934	0.87	1.16178e-36
Mgat4a	8.42904e-41	1.38422	0.267	0.121	1.68454e-36
A530017D24Rik	0.168673	0.683715	0.016	0.011	1
Usp54	0.00255821	0.683605	0.061	0.043	1
Fam3c	1.07667e-40	0.614201	0.657	0.506	2.15172e-36
Esr1	0.00114213	0.68332	0.045	0.028	1
Mreg	0.0478211	0.682977	0.016	0.01	1
Gtf2ird1	1.67865e-05	0.681785	0.097	0.065	0.335478
Ifi27l2a	1.14407e-40	-1.95826	0.051	0.136	2.28643e-36
Hoxb2	1.70734e-40	1.39869	0.236	0.093	3.41212e-36
Fkbp9	2.0109e-40	0.524774	0.719	0.588	4.01879e-36
Dhcr7	0.0291679	0.679373	0.033	0.023	1
Spata2l	0.0342801	0.67902	0.015	0.009	1
Gm49334	0.0945204	0.678138	0.012	0.007	1
Ikbkg	0.000287331	0.67806	0.074	0.05	1
Kcnn1	0.0440898	0.676303	0.016	0.01	1
Hacd4	2.32157e-40	1.73581	0.215	0.081	4.63967e-36
Fstl1	2.73851e-40	0.270752	0.977	0.951	5.4729e-36
Atp6ap1l	0.168447	0.676025	0.02	0.015	1
Enox2	8.3914e-05	0.673953	0.054	0.032	1
Zfp142	0.00790188	0.6731	0.042	0.029	1
Ppef1	3.02236e-40	2.80268	0.133	0.023	6.04018e-36
Tm7sf2	0.0236558	0.672582	0.032	0.022	1
Rps12	3.13392e-40	-0.318005	0.922	0.969	6.26314e-36
Cpne8	3.1388e-40	-0.977843	0.197	0.335	6.27289e-36
Hrct1	4.02929e-40	-1.08282	0.146	0.271	8.05254e-36
Plce1	4.33375e-40	-1.34917	0.087	0.191	8.661e-36
Zfp960	0.027336	0.668711	0.028	0.019	1
Tubb4b	7.99869e-40	-0.741947	0.483	0.609	1.59854e-35
Tenm3	0.0152756	0.667681	0.047	0.034	1
Wls	1.02385e-39	0.572793	0.67	0.531	2.04617e-35
H2-D1	1.05283e-39	0.422366	0.829	0.709	2.10409e-35
Igfbp7	1.05735e-39	0.219131	1	1	2.11312e-35
Htr1b	1.22168e-39	1.77357	0.194	0.065	2.44152e-35
Mtus2	1.64867e-39	0.555315	0.707	0.578	3.29487e-35
Sema3b	1.99838e-39	1.49266	0.233	0.095	3.99376e-35
Apbb2	2.8687e-39	-1.09801	0.15	0.274	5.73309e-35
Elf4	0.0262506	0.660922	0.021	0.013	1
Gm43136	0.126553	0.66025	0.01	0.006	1
Rhobtb1	2.99344e-39	1.48045	0.243	0.104	5.98239e-35
Gspt2	0.00536741	0.658839	0.049	0.034	1
Platr25	0.00212574	0.658254	0.049	0.032	1
Flnc	3.07748e-39	1.52429	0.239	0.1	6.15034e-35
Sag	5.8554e-05	0.657325	0.075	0.048	1
Ankrd45	0.00100866	0.657324	0.034	0.019	1
Bmyc	5.14162e-39	0.728796	0.503	0.338	1.02755e-34
Gm26909	0.00117453	0.655906	0.048	0.031	1
Cyb561	5.67046e-39	1.41292	0.238	0.099	1.13324e-34
Bche	5.8448e-39	2.41973	0.142	0.031	1.16808e-34
Ubc	7.44936e-39	-0.56274	0.666	0.763	1.48875e-34
Pth1r	7.55789e-39	-0.925869	0.207	0.34	1.51045e-34
Cpne5	7.56582e-39	-2.56716	0.013	0.061	1.51203e-34
Selenow	8.37164e-39	-0.334438	0.871	0.939	1.67307e-34
Gcgr	9.18447e-39	-4.84544	0.001	0.024	1.83552e-34
Zfp185	0.247273	0.651444	0.01	0.007	1
Bmf	0.00174979	0.650372	0.028	0.015	1
Iigp1	4.65479e-06	0.649049	0.049	0.024	0.093026
Fau	1.69767e-38	-0.216849	0.99	0.995	3.39279e-34
Pcp4l1	2.18999e-38	-1.07124	0.421	0.531	4.3767e-34
AC154509.1	2.21818e-38	3.51015	0.108	0.01	4.43304e-34
AI480526	0.000505769	0.647393	0.05	0.031	1
Zfp760	0.00846525	0.647251	0.029	0.018	1
Gm47802	0.029726	0.647112	0.018	0.011	1
Tmem132a	2.34936e-38	1.728	0.213	0.083	4.6952e-34
Zfp607a	0.0070567	0.6464	0.029	0.018	1
Gm20655	0.00419528	0.646041	0.023	0.012	1
Igf1	3.42994e-38	-1.95791	0.046	0.124	6.85473e-34
Gm26870	0.75176	0.645433	0.024	0.023	1
Pla2g16	3.44541e-38	-1.06169	0.172	0.297	6.88565e-34
Bik	3.86283e-38	2.03352	0.173	0.053	7.71986e-34
Hps6	0.00155683	0.644159	0.026	0.013	1
Prss36	0.00435568	0.644067	0.038	0.024	1
Sparcl1	5.75989e-38	0.255234	0.991	0.936	1.15111e-33
Myl6b	0.0070676	0.643922	0.042	0.028	1
Atp13a3	6.13526e-38	1.10056	0.33	0.178	1.22613e-33
Tlr2	0.208014	0.64299	0.018	0.014	1
Vps37c	4.93515e-06	0.641402	0.103	0.067	0.0986291
Gm3739	0.254539	0.640528	0.012	0.009	1
Cobll1	6.84947e-38	-1.13258	0.122	0.234	1.36887e-33
D830025C05Rik	1.34879e-37	-1.90432	0.015	0.065	2.69556e-33
Anln	1.3586e-37	0.756564	0.504	0.342	2.71517e-33
Map7d2	1.40002e-37	-1.07934	0.143	0.261	2.79795e-33
Snx33	0.00127352	0.638306	0.047	0.029	1
Smim3	1.40647e-37	1.14172	0.304	0.155	2.81082e-33
Col23a1	0.32229	0.63769	0.011	0.009	1
Pim2	0.0183654	0.63579	0.021	0.012	1
Col27a1	0.0182027	0.635542	0.053	0.04	1
Anxa11	1.9116e-37	0.407954	0.84	0.771	3.82033e-33
Loxl1	1.98106e-37	0.543517	0.623	0.463	3.95915e-33
Atp2b1	2.08538e-37	-0.743901	0.397	0.53	4.16764e-33
Sox9	2.30791e-37	-1.37574	0.043	0.12	4.61236e-33
Nes	2.61214e-37	1.01824	0.321	0.17	5.22035e-33
Lrrc10b	2.70068e-37	-2.79561	0.009	0.051	5.39731e-33
As3mt	3.1757e-37	-1.46227	0.056	0.141	6.34664e-33
Bhlhe40	4.4625e-37	-1.04288	0.084	0.185	8.9183e-33
Tcim	6.41721e-37	-1.39434	0.073	0.165	1.28248e-32
Gm28523	0.122318	0.632972	0.018	0.012	1
Mindy2	6.88811e-37	-1.00505	0.15	0.27	1.37659e-32
Dock11	1.26551e-05	0.630598	0.073	0.044	0.252912
Tpm1	6.94241e-37	-0.286194	0.998	0.998	1.38744e-32
Flnb	8.7151e-06	0.629182	0.117	0.081	0.174171
AC124739.1	0.117964	0.627894	0.013	0.009	1
Ndc1	0.00211893	0.627758	0.045	0.029	1
Cntrob	0.0178432	0.627577	0.02	0.011	1
Eif2ak1	0.000256466	0.626581	0.07	0.046	1
Egflam	1.31711e-36	-3.6623	0.003	0.031	2.63224e-32
Slc43a3	1.6104e-36	-1.12655	0.149	0.267	3.21838e-32
Zgpat	4.58555e-05	0.626018	0.118	0.086	0.916423
Fst	1.81469e-36	-3.16633	0.041	0.113	3.62665e-32
Zfp36l1	2.03186e-36	-0.633468	0.64	0.717	4.06067e-32
Pim1	2.26555e-36	-0.711894	0.227	0.366	4.52771e-32
Cacna1d	2.30383e-36	1.79953	0.191	0.07	4.60421e-32
Rapgef5	2.60708e-36	-1.06469	0.173	0.295	5.21026e-32
Tmem109	2.76757e-36	0.526119	0.678	0.545	5.53099e-32
Gm42067	0.0450531	0.623408	0.026	0.018	1
Foxn3	3.07135e-36	0.45334	0.785	0.661	6.1381e-32
Nt5dc3	0.0376755	0.622045	0.038	0.028	1
Slc38a11	3.30444e-36	-1.20193	0.116	0.224	6.60393e-32
Ifi203	3.93273e-36	-2.97508	0.006	0.042	7.85957e-32
Zfp174	0.0485419	0.620805	0.011	0.006	1
Thnsl2	2.17129e-05	0.619809	0.103	0.07	0.433932
Ccdc42	4.22488e-36	1.14458	0.281	0.14	8.44342e-32
Nudt7	0.000667354	0.618326	0.046	0.028	1
A530046M15Rik	0.0887879	0.618242	0.012	0.007	1
Kpna2	0.00591066	0.617423	0.037	0.024	1
Slc25a35	3.0397e-06	0.616849	0.094	0.059	0.0607483
Fbxo24	0.022953	0.616829	0.026	0.016	1
Rbm38	6.34406e-36	-1.10698	0.12	0.23	1.26786e-31
Atrn	0.00258136	0.615915	0.072	0.053	1
Lrig3	1.25143e-05	0.614842	0.094	0.062	0.250098
Mmp23	6.3804e-36	0.494076	0.68	0.533	1.27512e-31
Ctnnb1	6.70515e-36	0.439203	0.803	0.727	1.34002e-31
Zfp827	0.000971209	0.613849	0.062	0.042	1
Csrnp1	7.67943e-36	-0.691254	0.246	0.387	1.53473e-31
Stard13	1.72436e-05	0.611945	0.097	0.065	0.344614
Gm3336	7.98508e-36	-3.14936	0.003	0.031	1.59582e-31
Mettl27	0.000128009	0.611382	0.056	0.033	1
Camkk1	0.0204913	0.61127	0.038	0.027	1
Tvp23bos	0.0384597	0.610106	0.026	0.018	1
Dnajc17	3.59299e-05	0.609888	0.088	0.058	0.71806
Syn1	0.0125737	0.609387	0.018	0.01	1
Pgm5	8.84927e-36	1.06895	0.331	0.188	1.76853e-31
Slc25a25	9.54644e-36	-1.533	0.059	0.142	1.90786e-31
Grk3	0.000706969	0.608092	0.057	0.037	1
Acaca	2.3438e-05	0.60791	0.087	0.057	0.468408
Alkbh1	7.48427e-05	0.607743	0.095	0.065	1
Sorbs1	9.92748e-36	-1.00176	0.351	0.471	1.98401e-31
Zcchc2	0.00292659	0.607188	0.051	0.035	1
Mvd	0.00900564	0.606862	0.029	0.018	1
Cntrl	5.28366e-05	0.6065	0.092	0.062	1
Hps1	0.0242183	0.606312	0.046	0.034	1
Rbm3	1.08211e-35	-0.414542	0.781	0.851	2.16259e-31
Zfyve1	0.00138442	0.605973	0.062	0.042	1
Tmcc3	1.15872e-35	1.12041	0.263	0.123	2.3157e-31
Dynlt1a	4.89486e-05	0.605327	0.107	0.075	0.978238
Srgap3	0.00855668	0.605084	0.041	0.028	1
Zfyve28	0.209708	0.605017	0.016	0.012	1
Alg2	6.98309e-05	0.604376	0.088	0.06	1
Runx1	1.17724e-35	-1.61191	0.041	0.113	2.35272e-31
Zfp239	0.0129281	0.60369	0.022	0.012	1
Stx1a	1.57167e-35	1.62891	0.188	0.068	3.14098e-31
6030443J06Rik	0.0609957	0.602937	0.013	0.008	1
Fam46b	1.08507e-05	0.602897	0.12	0.083	0.216851
Dmxl2	0.00234502	0.602683	0.044	0.028	1
Zfp169	0.10111	0.602357	0.01	0.006	1
Prkci	8.66751e-05	0.601917	0.145	0.111	1
Antxr2	1.72899e-35	1.33468	0.233	0.102	3.45538e-31
Serinc5	0.00275538	0.601388	0.077	0.057	1
Vstm4	2.1306e-35	-1.369	0.085	0.18	4.25801e-31
Paqr7	2.4208e-05	0.601332	0.104	0.071	0.483798
Cpeb3	1.00425e-05	0.600728	0.083	0.052	0.200699
Xrcc2	0.020479	0.600149	0.014	0.007	1
Zdhhc23	0.0629156	0.599183	0.028	0.02	1
Aldh1a1	3.66482e-35	-2.13294	0.022	0.079	7.32414e-31
Sorl1	4.03564e-35	0.855792	0.425	0.274	8.06523e-31
Gnpda1	0.000132822	0.598391	0.075	0.05	1
6030458C11Rik	9.39891e-05	0.598372	0.082	0.055	1
9530068E07Rik	4.11698e-35	0.442056	0.755	0.643	8.22779e-31
Cox6c	4.18618e-35	-0.254151	0.962	0.985	8.36609e-31
Rcbtb1	5.04707e-06	0.597461	0.111	0.075	0.100866
Hapln3	4.33279e-35	-3.49832	0.002	0.027	8.65907e-31
Svep1	4.83862e-35	-3.69183	0.002	0.029	9.66999e-31
Xlr3b	0.110387	0.59611	0.023	0.017	1
Cage1	0.067636	0.595773	0.028	0.02	1
Fancg	0.0914174	0.594863	0.02	0.014	1
Ecm1	5.36515e-35	0.435618	0.883	0.846	1.07222e-30
Gfpt2	5.55062e-35	-2.41199	0.021	0.077	1.10929e-30
Pla2g15	4.24728e-05	0.592525	0.094	0.064	0.848819
Scrn2	0.00187549	0.5922	0.061	0.042	1
Prelid2	2.85932e-05	0.591752	0.082	0.053	0.571435
Mdh2	1.14752e-34	-0.498496	0.673	0.745	2.29333e-30
Hspa4	1.18093e-34	0.630134	0.58	0.436	2.36009e-30
Usp13	0.0108818	0.591243	0.058	0.043	1
Mtss1	1.37574e-34	1.20254	0.256	0.121	2.74942e-30
Nphp3	0.00429801	0.590567	0.053	0.037	1
Wscd2	1.67375e-34	1.04652	0.333	0.189	3.34499e-30
Mgat5	0.001585	0.589819	0.073	0.052	1
Jag1	1.69355e-34	-0.874402	0.298	0.429	3.38455e-30
Bicdl1	0.000180343	0.589293	0.06	0.037	1
Kcnip4	1.7495e-34	2.49474	0.118	0.022	3.49637e-30
Tesc	2.05472e-34	-1.15018	0.201	0.319	4.10635e-30
Kcnk3	2.40241e-34	-1.50677	0.083	0.176	4.80121e-30
4732491K20Rik	0.00877521	0.588244	0.036	0.023	1
Abca7	0.510325	0.587851	0.019	0.017	1
Mrm1	0.0220637	0.587735	0.031	0.021	1
Lrrc32	2.63776e-34	-1.58343	0.042	0.114	5.27155e-30
Rap2c	0.000236441	0.587464	0.092	0.065	1
Hemk1	0.0415466	0.586625	0.026	0.018	1
Adamts9	0.000587384	0.586288	0.06	0.04	1
Sh3pxd2b	9.83054e-05	0.585994	0.117	0.086	1
Mt2	2.82915e-34	0.469824	0.494	0.32	5.65406e-30
Map3k4	8.23501e-06	0.585919	0.118	0.082	0.164577
Hspb8	2.90582e-34	0.745287	0.44	0.282	5.80728e-30
Ccdc141	2.91284e-34	1.24749	0.237	0.106	5.82131e-30
Chrnb3	0.0665685	0.584649	0.013	0.007	1
Gga2	3.26477e-34	1.1962	0.268	0.134	6.52464e-30
C1qtnf7	3.63794e-34	-1.16876	0.142	0.254	7.27043e-30
Ndn	4.04323e-34	-1.09287	0.154	0.268	8.0804e-30
Hcfc1	3.76791e-06	0.583681	0.176	0.133	0.0753016
Styx	0.0465086	0.583525	0.033	0.024	1
1500011B03Rik	0.000253854	0.583195	0.068	0.044	1
Spon1	5.24288e-34	-1.51768	0.051	0.128	1.04779e-29
Blm	0.180289	0.582988	0.011	0.007	1
Gen1	0.0899058	0.582983	0.013	0.008	1
Hyal2	0.00194021	0.582924	0.068	0.048	1
Mpped2	6.30458e-34	2.34031	0.122	0.024	1.25997e-29
Papss2	0.0372821	0.582798	0.062	0.049	1
Ddo	0.117867	0.582194	0.019	0.014	1
Ydjc	0.108456	0.58192	0.01	0.006	1
9130221H12Rik	0.209454	0.581844	0.016	0.012	1
Glo1	6.63868e-34	0.334395	0.845	0.782	1.32674e-29
Zfp7	0.121214	0.581303	0.02	0.015	1
Ldhb	7.02708e-34	0.525824	0.654	0.519	1.40436e-29
Ankrd52	0.0274346	0.580483	0.027	0.018	1
Tsacc	0.006768	0.58018	0.035	0.022	1
Prkdc	0.0222992	0.580032	0.035	0.024	1
Pomgnt2	2.20124e-05	0.57886	0.103	0.07	0.439918
Ccne2	0.291629	0.578743	0.013	0.01	1
Glipr1	8.5344e-34	0.958034	0.318	0.173	1.7056e-29
Rasl11a	9.52877e-34	-0.621969	0.614	0.712	1.90433e-29
Cdsn	0.0775421	0.578087	0.017	0.011	1
Zfp446	0.0459213	0.577612	0.027	0.019	1
Hic1	1.02515e-33	-3.20785	0.004	0.033	2.04877e-29
Ndufv3	1.05479e-33	0.400022	0.819	0.754	2.10799e-29
CT025619.1	1.08847e-33	1.01303	0.335	0.193	2.1753e-29
Cdkn2a	1.12044e-33	-5.12127	0.001	0.02	2.23919e-29
Enah	1.13526e-33	0.439623	0.81	0.735	2.26882e-29
Zfyve26	0.00204356	0.575873	0.041	0.026	1
Map7	0.00288826	0.575663	0.041	0.026	1
Tet1	0.000307285	0.575396	0.073	0.049	1
Pim3	1.13785e-33	-0.882122	0.177	0.298	2.27398e-29
Osmr	1.63668e-33	-1.23592	0.087	0.181	3.27091e-29
Ttf2	0.0194631	0.573099	0.024	0.015	1
Pdgfd	1.64409e-33	0.496999	0.661	0.516	3.28572e-29
Slc41a2	0.0015496	0.572744	0.044	0.028	1
Gas7	1.94086e-33	-1.7106	0.026	0.085	3.87881e-29
Gm26797	0.203114	0.572101	0.011	0.008	1
Sobp	3.71461e-06	0.572056	0.132	0.092	0.0742365
Zfp738	0.000421666	0.57186	0.061	0.04	1
Spata13	0.0011672	0.571776	0.067	0.046	1
Gm6712	0.0955366	0.570827	0.011	0.007	1
Pemt	0.102717	0.570201	0.013	0.009	1
Prlr	1.95851e-33	-6.27462	0	0.018	3.91408e-29
Scara5	2.56935e-33	-2.74337	0.008	0.045	5.13484e-29
Coil	0.0837086	0.568823	0.03	0.023	1
Pars2	0.0206003	0.568467	0.023	0.014	1
Mfsd3	0.00663861	0.568308	0.044	0.029	1
Epha1	0.000169229	0.568193	0.073	0.048	1
Atp6v0b	2.81907e-33	0.384225	0.839	0.767	5.63391e-29
Orai2	0.101977	0.567857	0.015	0.01	1
Scn3a	3.43397e-33	-4.31126	0.002	0.028	6.86278e-29
Zfp790	0.0815429	0.567331	0.022	0.016	1
Dok4	0.00114353	0.566756	0.057	0.038	1
Grpel2	0.000900562	0.566482	0.067	0.046	1
Mlh1	0.022375	0.565189	0.023	0.014	1
Olfr224	3.72693e-33	2.88658	0.111	0.019	7.44827e-29
Hus1	0.00234988	0.564129	0.055	0.037	1
Serhl	0.000292122	0.563756	0.095	0.068	1
Glb1l	0.0759995	0.563632	0.041	0.032	1
Ctnnal1	3.22637e-06	0.563065	0.16	0.118	0.0644789
Tpt1	7.11629e-33	-0.241516	0.981	0.995	1.42219e-28
Pcbp3	3.00704e-05	0.562249	0.069	0.041	0.600957
Pcsk4	0.109646	0.561442	0.01	0.006	1
Ndrg4	0.000397528	0.561334	0.086	0.061	1
Dlx5	0.377852	0.56055	0.023	0.02	1
Sugp2	0.000220937	0.560107	0.065	0.041	1
Lgals1	8.00627e-33	0.332104	0.952	0.935	1.60005e-28
Nfrkb	3.05355e-05	0.559495	0.105	0.071	0.610251
H2-DMb1	8.78193e-33	2.31549	0.128	0.03	1.75507e-28
Smoc1	1.01049e-32	0.585469	0.564	0.404	2.01946e-28
AC164424.1	0.0544404	0.558736	0.014	0.009	1
Klhl3	0.0262058	0.558665	0.019	0.011	1
Agrn	1.7735e-05	0.557921	0.162	0.123	0.354433
Dio2	1.13522e-32	-3.34638	0.006	0.039	2.26873e-28
D130017N08Rik	0.132546	0.557428	0.017	0.012	1
Zfp870	0.101941	0.557418	0.028	0.022	1
Rfx5	0.00642956	0.557417	0.041	0.027	1
Yars2	0.00627204	0.557086	0.072	0.054	1
Greb1l	0.0102454	0.556979	0.025	0.015	1
Dgke	0.0178284	0.556369	0.051	0.038	1
Sgcb	1.35609e-32	0.611651	0.547	0.4	2.71014e-28
Zbtb38	1.35947e-32	0.455587	0.773	0.653	2.7169e-28
Herc3	0.000956955	0.556243	0.088	0.065	1
Poll	0.0176547	0.556237	0.034	0.023	1
Pla2g6	0.0397921	0.556001	0.035	0.026	1
1110008L16Rik	0.0511692	0.555995	0.021	0.014	1
Pnisr	1.53296e-32	0.608606	0.574	0.431	3.06363e-28
Prep	0.00225583	0.554625	0.077	0.057	1
Garem1	0.00414688	0.554567	0.04	0.026	1
Spg11	0.056569	0.554505	0.035	0.026	1
Fuca2	0.000236298	0.5541	0.08	0.054	1
Ccdc28a	0.000353335	0.55394	0.069	0.045	1
Arl4a	1.58348e-32	0.705796	0.538	0.397	3.16459e-28
Actn4	1.83445e-32	-0.364836	0.902	0.921	3.66614e-28
Fem1c	2.67871e-05	0.55333	0.114	0.08	0.53534
Lsm11	0.0069913	0.553288	0.048	0.033	1
Cck	0.0150989	0.553267	0.018	0.01	1
Wfdc1	1.95147e-32	0.500944	0.688	0.56	3.90001e-28
9130019O22Rik	0.196537	0.552942	0.015	0.011	1
Slc23a2	0.00108825	0.55248	0.066	0.045	1
Stmn4	0.10062	0.552447	0.016	0.011	1
Hsd11b1	2.42276e-32	-3.49106	0.006	0.039	4.84188e-28
Ndnf	2.79724e-32	2.46775	0.132	0.034	5.59029e-28
Zfp973	0.0942285	0.552002	0.023	0.017	1
Dcp1b	0.00164965	0.551802	0.065	0.045	1
Nipal2	2.9601e-32	1.81625	0.161	0.054	5.91575e-28
Plxna4	1.7734e-05	0.551772	0.129	0.093	0.354413
Pnmal2	0.151405	0.551699	0.013	0.009	1
Prkcd	3.67449e-32	-0.585033	0.446	0.563	7.34347e-28
Trmt44	0.0108591	0.551097	0.052	0.037	1
Zfp423	0.00767872	0.551024	0.052	0.037	1
Gin1	0.00135145	0.550935	0.072	0.051	1
Gm47101	0.00174892	0.550772	0.038	0.023	1
Mdn1	0.00981276	0.550585	0.048	0.034	1
Inca1	0.11895	0.550404	0.012	0.008	1
Sypl	3.93378e-32	0.39954	0.832	0.729	7.86165e-28
Serpini1	4.49696e-32	-0.980625	0.257	0.375	8.98718e-28
Dph2	0.230511	0.549968	0.021	0.016	1
Mylk2	0.0387857	0.549494	0.018	0.011	1
Zfp235	0.034141	0.54949	0.035	0.025	1
Sbk1	0.0241496	0.548815	0.018	0.011	1
Ap1s2	4.6053e-32	0.776897	0.411	0.261	9.20369e-28
Cep131	0.223218	0.547786	0.034	0.028	1
Fam20b	0.00022322	0.547017	0.109	0.08	1
Rpl35a	6.30356e-32	-0.240609	0.959	0.982	1.25977e-27
Cfp	0.212644	0.546545	0.014	0.01	1
Ttc30b	0.00167043	0.546342	0.075	0.054	1
Tmem104	0.00242289	0.545936	0.037	0.022	1
Hspa1a	6.39535e-32	-0.589518	0.546	0.656	1.27811e-27
BC024978	0.0115549	0.545075	0.045	0.032	1
Irx3	8.04901e-32	2.80201	0.105	0.018	1.6086e-27
Filip1l	1.33888e-31	-0.560408	0.822	0.845	2.67575e-27
Cndp1	1.5075e-31	0.89973	0.363	0.221	3.01274e-27
AU020206	0.0172648	0.54351	0.029	0.019	1
Arl5c	0.00937795	0.543452	0.035	0.023	1
Cacnb1	7.0109e-05	0.543323	0.06	0.036	1
Hexb	1.79802e-31	0.489698	0.616	0.459	3.59335e-27
Ago4	0.0485915	0.54328	0.046	0.035	1
Cyp26b1	0.0260691	0.543195	0.012	0.006	1
Kcns3	9.0567e-05	0.542801	0.068	0.043	1
Dus2	9.88501e-05	0.54245	0.088	0.06	1
Abcc9	1.84964e-31	0.903869	0.261	0.127	3.69651e-27
Tgfbi	1.95537e-31	-2.5029	0.016	0.062	3.90781e-27
Zdhhc12	6.68848e-05	0.541035	0.074	0.048	1
Prr7	0.110269	0.540658	0.017	0.012	1
Lcor	0.010211	0.540514	0.07	0.054	1
Zkscan14	0.0202481	0.539423	0.032	0.022	1
Zzef1	0.000220145	0.539187	0.093	0.066	1
Mov10	0.461591	0.539164	0.011	0.009	1
Mmp17	2.19978e-31	0.975892	0.312	0.177	4.39627e-27
Lpar1	2.51863e-31	-1.88296	0.02	0.071	5.03349e-27
Gm20721	0.316753	0.538855	0.014	0.011	1
A430105I19Rik	2.88313e-31	1.26635	0.229	0.107	5.76194e-27
Fam184b	0.00787395	0.538068	0.022	0.012	1
Gm15737	0.294307	0.537035	0.011	0.008	1
Mrc2	3.47544e-06	0.536368	0.129	0.089	0.0694567
Ywhah	4.00433e-31	0.339559	0.884	0.834	8.00265e-27
Nr1d1	4.48587e-31	1.32679	0.206	0.09	8.96501e-27
Ipo13	0.0185735	0.533815	0.061	0.047	1
Cmtm3	5.81065e-31	-1.98207	0.023	0.076	1.16126e-26
Gcfc2	0.0159435	0.533339	0.043	0.031	1
Gpr157	0.251333	0.533277	0.01	0.007	1
Gpsm2	5.97098e-31	1.43176	0.18	0.069	1.1933e-26
Cxcl1	8.84493e-31	-3.10333	0.104	0.195	1.76766e-26
Tnfaip6	1.17009e-30	-2.90809	0.016	0.061	2.33843e-26
Chd3os	0.155454	0.532495	0.013	0.009	1
Blmh	1.28338e-30	-0.689807	0.391	0.507	2.56484e-26
Il33	1.84642e-30	-2.34154	0.017	0.064	3.69008e-26
Egr3	2.01413e-30	-1.32683	0.034	0.097	4.02525e-26
Hspa1b	2.05148e-30	-0.705218	0.572	0.683	4.09989e-26
Rnaseh2b	0.000108582	0.531229	0.101	0.071	1
Klf12	0.0538897	0.530832	0.033	0.024	1
Nol3	2.64171e-30	-1.79741	0.024	0.078	5.27947e-26
Pigg	0.0179473	0.530532	0.049	0.036	1
Vps25	2.699e-05	0.530373	0.074	0.046	0.539395
mt-Co1	2.69335e-30	0.197785	1	1	5.38266e-26
Rock2	2.95917e-30	0.37955	0.815	0.746	5.91391e-26
Slc25a29	2.68208e-05	0.52975	0.08	0.05	0.536014
Zfp287	0.0396315	0.52968	0.027	0.019	1
Cep192	0.00212969	0.529369	0.053	0.036	1
Ccdc17	0.137207	0.529367	0.011	0.007	1
Fchsd1	0.0876624	0.5277	0.028	0.021	1
Ercc8	0.00533402	0.527444	0.059	0.043	1
Lgals9	3.17516e-30	-1.98156	0.016	0.062	6.34556e-26
Bcorl1	0.00160129	0.526463	0.074	0.053	1
Plekha7	0.0262171	0.526307	0.028	0.019	1
Asb11	3.78332e-30	-3.00225	0.006	0.038	7.56097e-26
Atp2a2	3.9058e-30	0.279619	0.951	0.91	7.80573e-26
Zfp955b	0.00370498	0.525753	0.035	0.022	1
Mtcl1	0.444659	0.525737	0.01	0.008	1
Wdr37	0.000154504	0.525574	0.124	0.093	1
Rps20	4.04464e-30	-0.220618	0.987	0.992	8.08322e-26
Dcaf17	0.00159529	0.525101	0.076	0.055	1
Cavin3	4.10444e-30	-0.275052	0.926	0.96	8.20273e-26
Fabp3	4.27967e-30	1.23181	0.222	0.103	8.55293e-26
Susd5	4.46337e-30	0.402376	0.76	0.645	8.92004e-26
Zfp3	0.229391	0.524708	0.02	0.015	1
Rpsa	4.68698e-30	-0.220054	0.979	0.995	9.36692e-26
Frat1	0.00932116	0.5242	0.018	0.01	1
Stat5a	0.000132672	0.524076	0.085	0.058	1
Zfp146	0.0139028	0.52402	0.049	0.035	1
Zbtb7b	0.00147745	0.523594	0.082	0.06	1
Prdm5	0.00155966	0.522906	0.102	0.078	1
Katnb1	0.0263546	0.522901	0.055	0.043	1
Slc11a2	0.000393773	0.522876	0.089	0.063	1
Zfp78	0.208623	0.522662	0.015	0.011	1
Mlst8	0.0461882	0.522588	0.028	0.019	1
Tril	6.82212e-30	-4.02441	0.002	0.025	1.3634e-25
Trim68	7.31727e-30	-1.61712	0.031	0.09	1.46236e-25
Slc16a9	0.00100886	0.520889	0.055	0.036	1
Tnfrsf23	7.7146e-30	-2.20006	0.012	0.053	1.54176e-25
Eef1a1	7.82739e-30	-0.183815	0.997	0.997	1.5643e-25
Lyrm1	0.000953832	0.520357	0.082	0.059	1
Alkbh4	0.074845	0.520175	0.019	0.012	1
Mospd2	2.35627e-05	0.51982	0.117	0.082	0.470901
St3gal2	8.15249e-30	0.902356	0.33	0.198	1.62928e-25
Pnpo	0.00422426	0.519414	0.07	0.052	1
1110034G24Rik	8.19493e-05	0.518964	0.104	0.073	1
Lrch3	2.59908e-06	0.518441	0.168	0.124	0.0519427
Hilpda	0.000224059	0.518257	0.092	0.065	1
Vcam1	8.40449e-30	-0.883996	0.118	0.217	1.67964e-25
Alpk3	9.5426e-30	-2.56413	0.011	0.049	1.90709e-25
Grtp1	0.00651531	0.517665	0.076	0.058	1
Dusp10	4.1327e-05	0.516956	0.108	0.075	0.82592
Sphk2	1.55556e-05	0.516868	0.147	0.108	0.310879
2900055J20Rik	9.94747e-30	3.17336	0.09	0.011	1.988e-25
Pecr	0.000330317	0.516465	0.099	0.071	1
Hps3	0.00328161	0.516418	0.072	0.053	1
Apba1	0.157241	0.515559	0.04	0.033	1
5430403G16Rik	0.00132842	0.515297	0.064	0.044	1
Cep170b	9.26751e-06	0.515225	0.142	0.102	0.185211
Pnpla6	0.0217698	0.51469	0.044	0.032	1
Rrbp1	1.2842e-29	0.349039	0.849	0.75	2.56647e-25
Pkm	1.51182e-29	0.25209	0.939	0.917	3.02137e-25
Ptdss1	0.000130492	0.51337	0.108	0.078	1
Pms2	0.040454	0.513237	0.043	0.033	1
Kdm4b	0.0195632	0.513175	0.065	0.05	1
Negr1	0.113556	0.512705	0.01	0.015	1
Tal1	1.94801e-29	-4.72103	0.001	0.019	3.8931e-25
Tspo	2.30178e-29	0.261101	0.946	0.92	4.6001e-25
Adcy3	1.16147e-05	0.511475	0.103	0.069	0.232119
Trim13	0.0167277	0.511354	0.026	0.016	1
Mbd5	0.000101502	0.51134	0.108	0.077	1
1010001N08Rik	0.000419161	0.510819	0.066	0.044	1
Cldn3	2.67042e-29	3.11628	0.098	0.017	5.33683e-25
Sfrp1	2.7624e-29	-1.17775	0.175	0.282	5.52066e-25
Gm48715	3.62318e-29	-1.75843	0.018	0.065	7.24093e-25
Rps24	3.95772e-29	-0.227528	0.978	0.992	7.90951e-25
4921504A21Rik	0.0280932	0.509808	0.033	0.023	1
Edem3	0.000340394	0.509807	0.087	0.061	1
Fastkd1	0.0114553	0.509651	0.046	0.032	1
Tanc2	4.5614e-29	1.47702	0.184	0.078	9.11596e-25
Jph1	0.00252326	0.509064	0.054	0.036	1
Rps10	4.91058e-29	-0.220283	0.963	0.986	9.81379e-25
Ccdc39	0.108895	0.508618	0.024	0.018	1
Ctf1	0.000348595	0.508403	0.08	0.056	1
Mybl1	1.62704e-05	0.507882	0.131	0.094	0.325164
Gm17300	5.3653e-29	-1.31952	0.031	0.088	1.07226e-24
Asap2	5.84732e-29	0.716188	0.458	0.327	1.16859e-24
Cep57l1	0.00319229	0.5075	0.059	0.041	1
Fah	6.164e-05	0.507187	0.107	0.076	1
Fam213a	2.85225e-06	0.506741	0.113	0.074	0.0570022
Spint2	6.77607e-29	0.323203	0.862	0.801	1.3542e-24
Ablim3	7.44476e-29	-4.42654	0	0.016	1.48784e-24
Prdx4	7.90362e-29	0.445917	0.728	0.636	1.57954e-24
AI606181	0.190881	0.505699	0.017	0.013	1
Smg9	0.000777055	0.50502	0.06	0.04	1
Znrf3	4.14587e-06	0.504999	0.128	0.088	0.0828553
Stk17b	8.0064e-29	0.934878	0.267	0.142	1.60008e-24
Coa4	0.0179237	0.504353	0.056	0.043	1
Sprn	8.34525e-29	-3.37919	0.003	0.027	1.6678e-24
Armcx6	0.204118	0.50401	0.023	0.018	1
Tmem69	0.0264555	0.503968	0.03	0.02	1
Carf	0.00152391	0.5036	0.088	0.065	1
Gm12359	0.247787	0.503528	0.016	0.012	1
Vps13d	0.00188934	0.503493	0.119	0.094	1
Itga6	0.0448779	0.503147	0.011	0.006	1
Pgam5	0.000224785	0.503038	0.107	0.078	1
Sprtn	0.00803677	0.50274	0.044	0.03	1
Pcyt2	0.000302415	0.502325	0.131	0.101	1
Gm6169	0.0592155	0.502231	0.033	0.024	1
Rgs5	9.3885e-29	0.481333	0.278	0.147	1.87629e-24
B3gnt5	4.7383e-05	0.501799	0.122	0.087	0.94695
Gjc1	9.58516e-29	-0.771911	0.371	0.484	1.91559e-24
Lyplal1	6.09755e-06	0.501455	0.126	0.087	0.121859
Xrcc6	2.96077e-05	0.501118	0.12	0.085	0.59171
9230111E07Rik	0.140226	0.50098	0.019	0.014	1
Ankzf1	0.00359647	0.50096	0.079	0.059	1
Ppia	1.02219e-28	0.154729	0.997	0.998	2.04285e-24
Lrrc51	0.0297228	0.500827	0.03	0.02	1
Nbeal1	1.05966e-28	0.498487	0.687	0.572	2.11773e-24
Nxpe4	0.185985	0.500414	0.015	0.011	1
Ephx3	1.12563e-28	-6.14986	0	0.016	2.24957e-24
Bri3	1.24957e-28	0.239155	0.94	0.907	2.49727e-24
Rpusd3	0.0644058	0.500056	0.027	0.019	1
Sema3f	1.28303e-28	0.894483	0.355	0.223	2.56414e-24
Tbc1d32	0.118966	0.499212	0.031	0.024	1
Angptl6	0.00780151	0.498513	0.05	0.036	1
Smim14	1.4048e-28	0.27184	0.924	0.873	2.80749e-24
Vav3	0.0145315	0.498415	0.059	0.045	1
Chic1	0.0012563	0.498109	0.085	0.062	1
Asap3	0.0356957	0.497505	0.029	0.02	1
Ccnl1	1.42333e-28	-0.67121	0.374	0.488	2.84453e-24
Pdgfra	1.49164e-28	-1.68803	0.048	0.116	2.98104e-24
Mocs3	0.0176953	0.49622	0.047	0.034	1
Slc35c1	0.0440593	0.496125	0.022	0.015	1
Tcf15	1.53489e-28	-6.07391	0	0.017	3.06748e-24
Krt1	1.96007e-28	-4.37857	0.001	0.019	3.91719e-24
Zfand2a	0.00207829	0.495416	0.069	0.049	1
A930004D18Rik	0.0977937	0.4953	0.026	0.019	1
Usf3	0.000704809	0.495289	0.112	0.085	1
8430408G22Rik	0.59572	0.495175	0.013	0.011	1
Layn	0.00383994	0.495077	0.079	0.059	1
Rap1gds1	2.8154e-05	0.49498	0.14	0.104	0.562657
Lrrc4b	0.304208	0.494927	0.018	0.015	1
Nudt11	0.000567966	0.494795	0.049	0.03	1
Gzf1	0.00246698	0.494699	0.085	0.064	1
Erg	0.0621764	0.49441	0.026	0.019	1
Ifit2	0.00263253	0.494216	0.063	0.044	1
P3h4	2.12245e-28	0.585922	0.507	0.372	4.24172e-24
Cpxm1	2.22948e-28	-2.54003	0.017	0.062	4.45561e-24
Tab3	0.0221095	0.493229	0.021	0.013	1
Tmem108	2.29778e-28	2.42666	0.101	0.02	4.59212e-24
Ccdc163	4.34522e-06	0.493113	0.119	0.08	0.0868392
5033417F24Rik	0.118466	0.492927	0.012	0.008	1
Man2b1	2.47337e-28	0.711733	0.459	0.323	4.94304e-24
Dennd1a	2.50196e-05	0.492642	0.127	0.091	0.500016
Cpt1c	0.0133376	0.492607	0.067	0.051	1
Ctsk	2.82199e-28	-1.27666	0.085	0.17	5.63975e-24
Nyap1	0.0771402	0.492142	0.027	0.02	1
Slc27a4	0.000973693	0.491983	0.077	0.054	1
Ldb2	2.84877e-28	1.26812	0.19	0.082	5.69326e-24
Mapk12	0.132421	0.491432	0.027	0.021	1
Actn2	2.93618e-28	3.11567	0.092	0.015	5.86795e-24
Atp6ap1	3.31767e-28	0.455421	0.661	0.53	6.63036e-24
Xylt2	0.00272069	0.490378	0.106	0.083	1
Tmed3	3.52323e-28	0.424704	0.642	0.513	7.04118e-24
Atp2a3	0.00106353	0.489284	0.093	0.069	1
Map9	0.136227	0.489116	0.025	0.019	1
Igsf10	3.9583e-28	-3.03162	0.003	0.027	7.91066e-24
Mtss1l	4.14399e-28	-0.762345	0.215	0.331	8.28176e-24
Fbln7	4.37711e-28	-1.87552	0.025	0.077	8.74766e-24
Pld1	0.0109311	0.48742	0.063	0.047	1
Rhbdd1	4.42074e-05	0.487161	0.111	0.078	0.883485
Myl12b	4.42172e-28	-0.550894	0.586	0.672	8.83681e-24
Nabp1	4.46527e-28	-1.82583	0.028	0.082	8.92384e-24
Coq8a	4.73557e-28	1.36357	0.195	0.087	9.46404e-24
Wif1	5.1328e-28	0.569809	0.228	0.11	1.02579e-23
Akap12	6.12296e-28	-0.934791	0.157	0.261	1.22367e-23
Tmco6	0.00568022	0.485879	0.077	0.058	1
Mapk8	0.00505342	0.485802	0.099	0.078	1
Otub2	0.0748155	0.485469	0.025	0.018	1
Gtf2e1	0.00156296	0.485231	0.051	0.033	1
Tuba1c	6.58431e-28	-0.906342	0.33	0.437	1.31587e-23
Ppm1f	0.0992351	0.484947	0.035	0.027	1
Myo5a	0.0540078	0.484639	0.053	0.042	1
Iqcc	3.57661e-05	0.484604	0.099	0.067	0.714786
Fndc1	6.80912e-28	-2.74301	0.004	0.03	1.3608e-23
Angptl7	7.10149e-28	-2.89961	0.015	0.058	1.41923e-23
Gm20300	1.18951e-05	0.484098	0.163	0.123	0.237723
Fry	7.25491e-28	0.420408	0.691	0.571	1.44989e-23
Srxn1	0.000781496	0.483813	0.106	0.079	1
Tgfbr1	8.82659e-28	0.729578	0.423	0.289	1.76399e-23
Kat14	0.00125373	0.483429	0.087	0.064	1
Frrs1	0.0820863	0.483403	0.033	0.026	1
Cox7a2	9.80093e-28	-0.266867	0.908	0.94	1.95871e-23
Nkx2-5	0.173058	0.4826	0.02	0.015	1
Intu	0.0683295	0.482506	0.015	0.009	1
Wnk2	1.29602e-27	-5.91328	0	0.016	2.59009e-23
Rgs4	1.36452e-27	-1.2638	0.215	0.315	2.72699e-23
Ankrd16	0.00606475	0.48218	0.075	0.057	1
Arhgef5	1.27957e-05	0.481858	0.13	0.092	0.255722
Nfic	1.61842e-27	0.449494	0.698	0.585	3.23442e-23
Twist1	1.61886e-27	-0.78493	0.278	0.393	3.23529e-23
Lrg1	0.559084	0.48141	0.01	0.009	1
Nedd4	1.71858e-27	0.206177	0.983	0.975	3.43458e-23
Alg3	0.00267405	0.480868	0.083	0.062	1
Pipox	0.0360023	0.480365	0.026	0.018	1
Eif5a2	0.00460403	0.480278	0.067	0.049	1
Rab10os	0.00095326	0.479869	0.117	0.09	1
Khk	0.000749944	0.479839	0.064	0.043	1
Ypel4	0.0193544	0.47981	0.047	0.035	1
Mast4	1.77996e-27	-0.518818	0.573	0.66	3.55725e-23
Qsox2	0.00554704	0.479269	0.106	0.085	1
Zc3h12c	0.0256567	0.479233	0.045	0.033	1
Frzb	1.87529e-27	1.15873	0.201	0.092	3.74776e-23
Hist1h4a	2.91571e-27	-1.94023	0.016	0.058	5.82705e-23
Pabpc1	3.27967e-27	-0.330509	0.807	0.858	6.55442e-23
D6Wsu163e	0.00317115	0.478068	0.063	0.044	1
Ccdc137	0.00337245	0.477581	0.081	0.061	1
Calu	3.77873e-27	0.467783	0.663	0.548	7.55179e-23
Chd8	0.000407356	0.477361	0.153	0.121	1
Dhodh	0.00485111	0.476592	0.074	0.055	1
Rras2	3.98798e-06	0.475331	0.151	0.108	0.0796997
Plbd2	3.91733e-27	0.782846	0.385	0.257	7.82879e-23
Atp5b	4.00451e-27	-0.361482	0.816	0.858	8.00302e-23
Hid1	0.113271	0.474715	0.054	0.045	1
Rarres2	4.15862e-27	0.285817	0.9	0.874	8.311e-23
Tmem254a	0.131989	0.473698	0.014	0.01	1
Pkd1	4.53689e-27	0.689408	0.506	0.384	9.06697e-23
Adamtsl2	4.89997e-27	-2.28901	0.008	0.041	9.79258e-23
Sfxn4	0.00204347	0.472905	0.045	0.028	1
Unc13b	0.0521202	0.472795	0.029	0.021	1
Lpcat4	0.00010788	0.472617	0.114	0.082	1
Polr3e	0.00601434	0.472436	0.08	0.061	1
Zfp868	0.00192055	0.472343	0.076	0.055	1
Creld1	4.92196e-27	0.754175	0.374	0.244	9.83654e-23
Tiparp	5.16656e-27	-1.02978	0.139	0.237	1.03254e-22
Usp31	0.0646131	0.471837	0.027	0.019	1
Comp	8.86798e-27	-2.4313	0.041	0.102	1.77227e-22
Kdm5b	3.38364e-06	0.471028	0.158	0.115	0.0676221
Wdr19	0.0572881	0.470974	0.025	0.018	1
Ldlrad4	4.67136e-05	0.470898	0.167	0.129	0.933571
Ppp1r3f	0.190618	0.470792	0.039	0.032	1
Mcph1	0.175489	0.470555	0.025	0.019	1
Pcdhga5	0.316067	0.470507	0.012	0.009	1
Galt	4.13622e-06	0.470313	0.167	0.123	0.0826623
Mettl24	9.71632e-27	1.14715	0.222	0.112	1.94181e-22
Brd3os	0.0293388	0.470023	0.039	0.028	1
Pigc	0.000245961	0.469893	0.114	0.085	1
Rapgef3	9.75031e-27	-3.31589	0.003	0.026	1.9486e-22
Kdm3b	0.000250626	0.469532	0.103	0.074	1
Lin52	0.00342162	0.469486	0.062	0.044	1
Usp45	0.000182355	0.469134	0.095	0.067	1
Sema6d	1.03431e-26	-2.90986	0.004	0.031	2.06706e-22
Tubb2a	1.24648e-26	-0.784693	0.309	0.422	2.4911e-22
Slc29a3	0.0032576	0.4685	0.062	0.044	1
Ass1	1.50923e-26	-1.62542	0.027	0.078	3.0162e-22
Gm42418	1.56499e-26	0.584774	0.749	0.66	3.12763e-22
Tspan11	1.81537e-26	-2.95449	0.004	0.028	3.62802e-22
L2hgdh	0.00163047	0.468004	0.066	0.046	1
Zfp518b	0.0190183	0.467914	0.037	0.026	1
Zfp759	0.147455	0.467884	0.017	0.012	1
Hist4h4	1.82607e-26	-1.96452	0.018	0.061	3.64941e-22
Sfrp2	2.01232e-26	1.45902	0.162	0.064	4.02162e-22
Snd1	2.31111e-26	0.685761	0.391	0.26	4.61875e-22
6720489N17Rik	0.0625632	0.466642	0.024	0.017	1
Zfp583	0.186839	0.46613	0.023	0.018	1
Kcnc4	2.81843e-26	5.18836	0.065	0.002	5.63264e-22
Map1a	3.55199e-26	0.842368	0.318	0.195	7.09865e-22
Bbs9	0.0559235	0.465695	0.038	0.029	1
Zfp420	0.202408	0.465695	0.027	0.022	1
Camk2b	3.6758e-26	2.16037	0.109	0.028	7.34608e-22
Rps7	4.22848e-26	-0.222765	0.958	0.986	8.45062e-22
A630072M18Rik	0.00626965	0.464795	0.042	0.028	1
Tesk2	0.258717	0.464652	0.018	0.014	1
Sept9	4.38482e-26	0.902326	0.315	0.193	8.76306e-22
F8a	0.00237249	0.464364	0.067	0.048	1
Trnp1	5.08152e-26	2.06786	0.113	0.031	1.01554e-21
Gm16141	0.0154469	0.463791	0.053	0.039	1
Bysl	0.00038147	0.46373	0.11	0.082	1
Brca2	0.195579	0.463444	0.029	0.023	1
Thra	5.59661e-26	0.274574	0.927	0.879	1.11848e-21
Afg3l1	3.22214e-06	0.463174	0.188	0.142	0.0643944
Ctsa	5.70876e-26	0.491713	0.579	0.449	1.14089e-21
Malat1	5.98453e-26	-0.182902	1	0.999	1.19601e-21
Aasdh	0.0247057	0.462717	0.034	0.023	1
Tmem260	0.00508551	0.462656	0.057	0.04	1
Gramd3	6.90556e-05	0.462484	0.127	0.093	1
Zfp763	0.0182376	0.462088	0.05	0.037	1
Csdc2	1.10287e-05	0.461957	0.123	0.086	0.220408
Trim59	6.44718e-26	-1.43879	0.028	0.081	1.28847e-21
Rnf145	2.20436e-05	0.461799	0.167	0.126	0.440542
Brf1	0.00141185	0.461549	0.099	0.074	1
Parp14	0.106151	0.461531	0.029	0.022	1
Fbxl19	0.161465	0.461285	0.022	0.017	1
Rps16	6.6132e-26	-0.216273	0.967	0.985	1.32165e-21
Gcat	6.62756e-05	0.461141	0.129	0.095	1
Fbxo36	0.007384	0.461127	0.041	0.028	1
Fra10ac1	4.40303e-05	0.460908	0.189	0.149	0.879945
Cenpw	8.90162e-05	0.460852	0.131	0.097	1
Ttyh2	0.122876	0.460619	0.027	0.021	1
Rerg	6.83284e-26	-4.52406	0.001	0.02	1.36554e-21
Clec2d	8.16327e-26	-1.40549	0.063	0.134	1.63143e-21
Smg1	8.17034e-06	0.460109	0.202	0.158	0.163284
C920021L13Rik	0.204818	0.459812	0.017	0.012	1
Scai	0.00505174	0.45845	0.077	0.058	1
Serpinb6a	8.24902e-26	-0.374162	0.691	0.752	1.64857e-21
Syn2	0.208833	0.457805	0.027	0.022	1
Sil1	5.34579e-05	0.457421	0.146	0.109	1
BC024063	0.0718529	0.457213	0.023	0.016	1
Arhgap12	6.49859e-05	0.457186	0.136	0.1	1
Dok1	0.000226327	0.457175	0.149	0.115	1
Zfp141	0.100523	0.457104	0.022	0.016	1
Acss1	8.39918e-26	-1.686	0.019	0.063	1.67858e-21
Mvk	0.000249473	0.456561	0.11	0.081	1
Smc4	8.78471e-26	-0.888689	0.141	0.239	1.75562e-21
Rasal2	8.90029e-26	-0.708733	0.288	0.396	1.77872e-21
Picalm	9.02014e-26	0.447005	0.7	0.601	1.80268e-21
Sall3	1.06362e-25	-3.64089	0.001	0.019	2.12565e-21
Chchd10	1.1335e-25	-0.982476	0.212	0.315	2.26531e-21
Lpar6	0.104363	0.455177	0.038	0.03	1
Gm17634	1.165e-25	-3.39457	0.002	0.022	2.32826e-21
Tyro3	0.0520765	0.454677	0.026	0.018	1
Des	1.22424e-25	1.09856	0.397	0.292	2.44664e-21
Cyp1b1	1.23774e-25	-1.3527	0.06	0.13	2.47363e-21
Sept10	1.25106e-25	-0.750297	0.207	0.315	2.50024e-21
4833413G10Rik	0.394998	0.453778	0.011	0.009	1
Gm26890	0.0572711	0.453464	0.031	0.023	1
Sdc2	1.28211e-25	-0.460799	0.588	0.666	2.56229e-21
Pold1	0.0414385	0.453325	0.033	0.024	1
Fndc10	0.207772	0.453188	0.018	0.014	1
Slc15a4	0.00373488	0.453004	0.096	0.075	1
Sv2a	0.000349651	0.452757	0.068	0.045	1
9130023H24Rik	0.0790421	0.452556	0.032	0.024	1
Neto2	1.65645e-25	-1.83853	0.023	0.069	3.31042e-21
Serp2	0.0389266	0.451227	0.044	0.033	1
Mms19	0.00644608	0.45115	0.07	0.052	1
Pdpr	0.0238798	0.451071	0.035	0.024	1
Prepl	0.00495003	0.450839	0.038	0.024	1
Optn	3.75411e-05	0.450502	0.126	0.09	0.75026
Arhgef16	1.74661e-25	-5.38684	0	0.015	3.49059e-21
Pfkfb2	0.226262	0.449886	0.014	0.01	1
Hsd17b7	0.0754379	0.449723	0.041	0.032	1
Galc	0.0661507	0.449652	0.02	0.014	1
Sowahc	1.8815e-25	-1.78965	0.024	0.073	3.76017e-21
Gstt3	0.000142182	0.449222	0.145	0.112	1
Hr	0.000189263	0.448496	0.118	0.088	1
Smagp	2.016e-25	-2.61335	0.008	0.04	4.02898e-21
Tet3	5.37859e-06	0.448249	0.181	0.136	0.107491
2900076A07Rik	4.7928e-06	0.448168	0.13	0.09	0.095784
Sgk3	0.000243984	0.447992	0.1	0.072	1
Atad3aos	0.385974	0.447699	0.011	0.009	1
Icosl	2.37562e-25	-2.74259	0.002	0.023	4.74768e-21
Ganab	1.43161e-05	0.44738	0.155	0.115	0.286108
Tnfrsf11b	2.49715e-25	0.516641	0.313	0.187	4.99055e-21
Fjx1	2.52261e-25	0.940196	0.244	0.13	5.04144e-21
Ino80dos	0.150317	0.4467	0.023	0.018	1
Ccnj	0.0829019	0.446516	0.022	0.016	1
Casp4	2.66263e-25	-1.92659	0.016	0.056	5.32128e-21
N6amt1	2.72167e-25	0.741524	0.338	0.212	5.43926e-21
Ahsg	2.81533e-25	-3.37599	0.003	0.024	5.62645e-21
Cmtm8	2.92524e-25	2.70878	0.085	0.015	5.84609e-21
Tmem240	0.16774	0.444437	0.014	0.01	1
Fam126b	2.93859e-25	0.97401	0.249	0.134	5.87277e-21
Fan1	0.277491	0.444294	0.018	0.014	1
Slc25a38	0.000456431	0.443838	0.132	0.102	1
Nup153	0.00253859	0.443337	0.099	0.076	1
Armc2	0.00221973	0.443203	0.038	0.023	1
Eva1b	3.47427e-25	0.530651	0.578	0.461	6.94332e-21
Lrrc39	0.00787279	0.442841	0.051	0.036	1
Maoa	6.14981e-06	0.442767	0.148	0.107	0.122904
Sat2	0.00297375	0.442212	0.093	0.071	1
Ifi207	3.69264e-25	-2.55151	0.006	0.034	7.37975e-21
Armcx4	0.100476	0.442049	0.036	0.028	1
Armc3	3.74041e-25	-2.85054	0.004	0.029	7.4752e-21
Cacnb4	3.93955e-25	-2.96521	0.005	0.032	7.87318e-21
Xpo6	0.00124091	0.44173	0.124	0.098	1
Cdk20	0.0155438	0.441648	0.04	0.028	1
Abhd13	0.00178273	0.441242	0.103	0.078	1
Lama4	3.97925e-25	0.714332	0.356	0.228	7.95253e-21
Plk3	3.98539e-25	-1.31814	0.038	0.095	7.9648e-21
Gm26825	4.73458e-25	-0.386267	0.452	0.586	9.46205e-21
Prkcg	0.186054	0.43987	0.013	0.009	1
Arl6ip5	5.09554e-25	0.284129	0.853	0.787	1.01834e-20
Igfbp6	5.49882e-25	-2.27433	0.031	0.083	1.09894e-20
Slc16a4	0.084084	0.439343	0.014	0.009	1
Txnip	5.81452e-25	-0.407914	0.64	0.729	1.16203e-20
Pdia3	6.11576e-25	0.205987	0.946	0.922	1.22223e-20
Gss	0.000421363	0.438285	0.125	0.096	1
Tecr	6.30341e-25	0.336913	0.75	0.663	1.25974e-20
Foxl2	6.35127e-25	-4.44514	0.001	0.019	1.2693e-20
Zmym4	7.79434e-05	0.437555	0.147	0.111	1
Klf5	0.44286	0.43749	0.011	0.009	1
Slc39a3	0.000226281	0.43739	0.117	0.087	1
Ubtd1	0.000272844	0.437165	0.1	0.072	1
Sfxn1	6.54854e-25	-0.721875	0.247	0.356	1.30873e-20
Nacc1	1.92527e-05	0.435886	0.165	0.124	0.384765
Nfat5	6.80019e-25	0.655269	0.417	0.288	1.35902e-20
Myo7a	6.99838e-25	-3.53454	0.001	0.019	1.39863e-20
Rgs17	7.19438e-25	-1.27673	0.047	0.11	1.4378e-20
Rad9b	0.315176	0.435464	0.016	0.012	1
Polr3f	0.000631602	0.435373	0.111	0.083	1
Fbxl12	0.00171634	0.435158	0.076	0.055	1
Bag4	0.0366435	0.43514	0.064	0.051	1
Bace2	7.45808e-25	-2.17094	0.016	0.057	1.4905e-20
Cdpf1	8.02901e-06	0.434992	0.179	0.135	0.16046
Sh3d19	6.44936e-06	0.434831	0.144	0.103	0.12889
Hacd1	7.52416e-25	0.4162	0.683	0.552	1.5037e-20
Xk	8.13491e-25	0.962862	0.274	0.159	1.62576e-20
Gstm4	0.0246636	0.434315	0.054	0.041	1
Cidea	0.00121532	0.434217	0.155	0.126	1
Gdpd3	8.21616e-25	-2.98959	0.008	0.04	1.642e-20
Fam89b	0.00849337	0.433755	0.038	0.026	1
Dcun1d2	0.000365315	0.43374	0.098	0.07	1
Jph2	8.95773e-25	0.520736	0.6	0.48	1.7902e-20
Tor4a	0.0896029	0.43333	0.022	0.016	1
Zfp101	0.0458052	0.432939	0.052	0.041	1
Ddx19b	0.101512	0.432324	0.039	0.031	1
Dtx3l	0.00477851	0.432258	0.075	0.056	1
Dopey1	0.00188963	0.431931	0.115	0.09	1
Adamts2	9.88998e-25	0.454757	0.464	0.314	1.97651e-20
Strada	0.00393458	0.431756	0.106	0.083	1
Spa17	0.0710592	0.431739	0.049	0.039	1
Arhgap32	0.0379156	0.431535	0.053	0.041	1
Zfp595	0.0748656	0.431376	0.02	0.014	1
Cd59a	9.89817e-25	0.417218	0.716	0.627	1.97815e-20
Palm	6.78298e-06	0.430898	0.238	0.189	0.135558
Gm20696	0.00594985	0.430827	0.042	0.028	1
Itga5	1.02481e-24	0.982552	0.299	0.184	2.04807e-20
2310057M21Rik	4.77687e-05	0.430501	0.145	0.108	0.954657
Myh11	1.08213e-24	0.195522	0.996	0.98	2.16263e-20
Rpl36	1.08661e-24	-0.213435	0.948	0.978	2.1716e-20
Prkca	0.000713616	0.430131	0.119	0.091	1
Rbm12b2	0.0150861	0.429902	0.045	0.032	1
Mblac2	0.0130739	0.429861	0.051	0.037	1
Stxbp6	1.25832e-24	-1.78539	0.033	0.087	2.51475e-20
C1qtnf6	1.45092e-24	1.39414	0.166	0.072	2.89967e-20
Tsc1	0.00568414	0.42839	0.061	0.044	1
Ddost	1.59431e-24	0.360983	0.752	0.648	3.18623e-20
Enkd1	0.0564159	0.4283	0.037	0.028	1
Fnbp4	5.96683e-05	0.428099	0.141	0.105	1
Sgk1	1.60355e-24	-0.497295	0.47	0.571	3.2047e-20
Cyb5rl	0.0126701	0.427869	0.025	0.015	1
Adat2	0.00151658	0.427754	0.1	0.075	1
Fam117b	0.0612171	0.427641	0.063	0.052	1
Bok	2.18401e-24	-1.58164	0.044	0.104	4.36474e-20
Gabra3	2.23475e-24	0.891532	0.278	0.162	4.46614e-20
Lrp8	0.546468	0.427077	0.011	0.01	1
Sat1	2.32973e-24	0.478163	0.818	0.718	4.65596e-20
Synj2	0.0021993	0.426438	0.107	0.083	1
Slbp	2.56824e-24	-0.563843	0.331	0.445	5.13262e-20
Zbtb18	0.02177	0.425864	0.053	0.04	1
Nedd9	2.63993e-24	0.687212	0.417	0.295	5.27589e-20
Armc7	0.605192	0.425245	0.015	0.014	1
Zw10	0.000140022	0.425035	0.118	0.086	1
Efemp1	2.75626e-24	-2.09213	0.017	0.057	5.50838e-20
Capzb	2.80556e-24	0.269654	0.876	0.839	5.60691e-20
Xndc1	0.164813	0.424621	0.044	0.037	1
Sacs	0.00314492	0.424581	0.149	0.123	1
Apol9a	0.0909647	0.424513	0.013	0.008	1
Rpl28	3.31128e-24	-0.205468	0.953	0.977	6.6176e-20
Cptp	0.0143434	0.42398	0.051	0.037	1
Pccb	0.012666	0.423683	0.099	0.08	1
Cic	0.000695173	0.423295	0.138	0.108	1
Gldn	3.56106e-24	1.35623	0.164	0.07	7.11678e-20
Cspp1	2.84119e-05	0.422874	0.233	0.189	0.567811
Magi2	1.50032e-05	0.422739	0.161	0.12	0.299839
Ntn1	3.64881e-24	0.719143	0.289	0.169	7.29215e-20
Fam199x	0.00661247	0.421938	0.071	0.053	1
Phactr1	2.94635e-05	0.421588	0.185	0.143	0.588828
Kptn	0.00518362	0.421282	0.074	0.055	1
Tcf20	0.00361285	0.421255	0.092	0.07	1
Lig3	0.00913177	0.421245	0.064	0.048	1
S100a4	4.11645e-24	0.383336	0.533	0.394	8.22672e-20
Tfap2a	4.31322e-24	-1.66145	0.026	0.074	8.61997e-20
Mlph	0.063017	0.421001	0.031	0.023	1
Invs	5.8671e-05	0.420734	0.094	0.064	1
Casp8	0.00253907	0.420719	0.096	0.074	1
Bmper	4.33012e-24	-3.25942	0.002	0.019	8.65374e-20
Tiam2	0.576371	0.420196	0.019	0.017	1
Arid3a	0.235838	0.419401	0.012	0.009	1
Shroom3	5.31082e-24	1.8312	0.117	0.037	1.06137e-19
Phkg2	0.000258584	0.418737	0.136	0.104	1
Zfp691	0.0111936	0.418725	0.059	0.043	1
Nfe2l1	5.9923e-24	0.473666	0.649	0.546	1.19756e-19
Dph6	0.00903523	0.418613	0.105	0.085	1
Xrcc4	3.07953e-05	0.418465	0.173	0.132	0.615445
2010315B03Rik	0.13295	0.418367	0.034	0.027	1
Ppp2r5b	9.86073e-05	0.418201	0.142	0.107	1
Ints4	0.00956945	0.418112	0.072	0.054	1
Tmtc3	0.00450029	0.418005	0.113	0.09	1
Phex	6.59032e-24	-1.24924	0.034	0.088	1.31708e-19
Wdtc1	0.00028604	0.417805	0.175	0.141	1
Tspyl2	0.00545679	0.417662	0.123	0.1	1
Dync2h1	0.0115014	0.41731	0.074	0.057	1
Unc5c	6.95139e-24	1.3679	0.165	0.073	1.38924e-19
Entpd7	0.00424768	0.417153	0.082	0.062	1
Ap5s1	0.00130274	0.416765	0.087	0.064	1
Gstm7	8.48802e-24	1.20329	0.185	0.087	1.69633e-19
Spry1	8.84642e-24	-0.930342	0.237	0.336	1.76796e-19
Fktn	0.000256115	0.416168	0.124	0.092	1
Dclre1a	0.0136112	0.415497	0.053	0.039	1
Bmp4	1.18978e-23	-1.5102	0.038	0.094	2.37778e-19
Zfp729a	0.0400184	0.415043	0.056	0.044	1
Rnf219	0.0116753	0.41493	0.082	0.065	1
Prelid3a	0.0173587	0.414911	0.02	0.011	1
Nudt8.1	0.335556	0.414617	0.013	0.01	1
Adrb1	1.2578e-23	-1.80628	0.015	0.052	2.51371e-19
Gm9008	0.0288368	0.414167	0.039	0.028	1
Trit1	0.00538461	0.414074	0.049	0.033	1
Gab2	0.00197869	0.41402	0.133	0.107	1
Rabif	0.000234872	0.413697	0.16	0.126	1
Mast2	0.000791633	0.413668	0.114	0.087	1
Usp12	0.00366286	0.413485	0.098	0.077	1
Fbln1	1.31957e-23	-2.0108	0.18	0.263	2.63717e-19
Uhrf1bp1l	2.851e-06	0.413088	0.197	0.148	0.0569773
Slc25a37	0.00581669	0.412936	0.083	0.064	1
Zfp712	0.39796	0.41259	0.022	0.019	1
A330041J22Rik	0.0591478	0.41252	0.02	0.013	1
Wdfy3	0.000586546	0.412364	0.124	0.095	1
Zfp365	1.26897e-05	0.412163	0.154	0.114	0.253603
Tacc2	1.37382e-23	0.777045	0.351	0.23	2.74557e-19
Slit2	1.42318e-23	-1.69187	0.018	0.059	2.84423e-19
Sncaip	0.0102993	0.411226	0.086	0.067	1
Gk5	0.0173356	0.41047	0.053	0.04	1
Hmgb3	0.00945988	0.410353	0.048	0.034	1
Ppt1	1.49214e-23	0.400679	0.655	0.547	2.98204e-19
Fat3	1.55614e-23	-5.88346	0	0.013	3.10994e-19
Gpc1	3.72273e-06	0.409179	0.189	0.142	0.0743988
Camk2g	1.76215e-23	-0.529856	0.518	0.592	3.52165e-19
Slc29a1	1.78336e-23	0.430249	0.672	0.55	3.56405e-19
Zfp952	0.0280022	0.408388	0.046	0.035	1
Pcsk5	1.90014e-23	1.5279	0.143	0.056	3.79742e-19
Tmem201	0.0531393	0.407703	0.053	0.042	1
Prr14l	0.0550839	0.407502	0.048	0.037	1
Map3k14	0.221714	0.407484	0.033	0.027	1
Colec11	1.9474e-23	-3.73868	0.006	0.033	3.89187e-19
Dusp14	0.00185106	0.406502	0.064	0.045	1
Apobec1	0.0719916	0.406463	0.025	0.018	1
Helz	3.59831e-05	0.40643	0.162	0.123	0.719123
Ech1	1.96366e-23	-0.415161	0.635	0.711	3.92437e-19
Slc35a3	0.0120973	0.406095	0.053	0.039	1
Stard4	0.234875	0.406018	0.042	0.036	1
Pex5l	2.03388e-23	-2.70154	0.005	0.029	4.06471e-19
Adcy5	2.06846e-23	0.428986	0.695	0.581	4.13382e-19
Mtg2	1.94519e-05	0.405487	0.2	0.155	0.388746
Wtip	2.07976e-23	-0.811953	0.762	0.767	4.1564e-19
Mettl4	0.227111	0.405129	0.025	0.02	1
Ago1	0.0007323	0.4051	0.101	0.075	1
Zer1	4.47987e-05	0.404924	0.182	0.141	0.895301
AU022252	0.0058438	0.404861	0.069	0.051	1
Tmem100	2.2538e-23	-2.87392	0.006	0.032	4.50422e-19
Naif1	0.403772	0.404804	0.015	0.012	1
Eif4a1	2.27409e-23	-0.314722	0.835	0.871	4.54477e-19
Commd5	0.0312215	0.404549	0.031	0.022	1
Aspscr1	0.00141522	0.404546	0.161	0.132	1
Cdc25b	0.019083	0.404318	0.062	0.048	1
Kdm6a	0.000413973	0.404206	0.158	0.126	1
Kri1	0.0750736	0.404125	0.035	0.027	1
Cdc45	0.290753	0.403673	0.016	0.013	1
Uqcrh	2.38883e-23	-0.254189	0.88	0.925	4.77407e-19
Clec16a	0.00799329	0.402751	0.062	0.045	1
Fmod	2.47436e-23	-2.73917	0.013	0.048	4.94501e-19
Il13ra1	2.60916e-23	-1.18568	0.073	0.144	5.21441e-19
Rnf144b	0.0709068	0.40229	0.041	0.032	1
Bnip3	2.76428e-23	0.706118	0.335	0.215	5.52441e-19
Arhgap15	2.81688e-23	-4.03011	0.001	0.016	5.62953e-19
Marcks	2.82225e-23	-1.16268	0.117	0.2	5.64027e-19
Vars	0.000588799	0.401788	0.148	0.117	1
Syngr2	3.04985e-23	0.60182	0.469	0.353	6.09512e-19
Glb1	0.0573611	0.401725	0.043	0.033	1
Rnf213	0.100365	0.401255	0.027	0.02	1
Ing4	0.000170476	0.401009	0.169	0.134	1
Ank2	0.00218551	0.400935	0.128	0.102	1
Gm16973	0.225131	0.400834	0.016	0.012	1
Vamp2	3.58665e-23	0.398585	0.664	0.559	7.16791e-19
AW549877	5.99241e-05	0.400631	0.201	0.161	1
Zfp128	0.340009	0.400302	0.015	0.012	1
CAAA01147332.1	0.02508	0.400277	0.036	0.026	1
Asxl2	0.00250071	0.400241	0.125	0.1	1
Cfl1	3.89073e-23	-0.267421	0.91	0.934	7.77563e-19
Tnik	4.27064e-23	1.54192	0.133	0.049	8.53487e-19
Cep41	0.000936974	0.399568	0.047	0.029	1
Rpl30	4.88538e-23	-0.201271	0.978	0.991	9.76343e-19
Hip1r	0.000159371	0.399414	0.132	0.098	1
Fam98a	5.65629e-06	0.399226	0.16	0.117	0.113041
Rnf111	0.000886642	0.399005	0.135	0.107	1
Gng2	0.153569	0.398903	0.019	0.014	1
Slc9a1	0.0502426	0.398895	0.067	0.055	1
Fbxw7	0.00464593	0.398619	0.099	0.078	1
Spin1	4.99048e-23	-0.486133	0.497	0.592	9.97347e-19
1600002K03Rik	0.000127341	0.398556	0.111	0.079	1
Tbc1d8b	0.0254086	0.398299	0.058	0.044	1
Cystm1	5.54442e-23	-0.580078	0.495	0.576	1.10805e-18
Bmp6	5.88551e-23	-3.78969	0.001	0.018	1.17622e-18
Gcn1l1	0.000865708	0.397305	0.155	0.125	1
Csf2ra	0.0269447	0.39729	0.032	0.022	1
D10Wsu102e	0.019853	0.397224	0.08	0.064	1
Arhgef10l	2.66275e-05	0.397211	0.265	0.218	0.532151
Ccdc68	7.86708e-06	0.397151	0.201	0.154	0.157224
Serpine1	6.14253e-23	-0.460822	0.413	0.522	1.22758e-18
C1qtnf12	0.00929273	0.396991	0.11	0.09	1
Eva1c	3.32673e-06	0.396746	0.201	0.152	0.0664847
Pogz	0.0637715	0.39647	0.076	0.064	1
Rhou	6.14871e-23	1.28683	0.161	0.071	1.22882e-18
Dapk2	6.28069e-23	1.04625	0.182	0.086	1.2552e-18
Brwd1	3.21835e-05	0.395728	0.222	0.178	0.643187
Ccl19	6.31902e-23	-2.85401	0.018	0.058	1.26286e-18
Pnldc1	0.00942608	0.395127	0.064	0.047	1
Tmem50b	3.5282e-05	0.395086	0.194	0.153	0.705111
1700001O22Rik	0.365271	0.395068	0.01	0.007	1
Abcd1	0.0180618	0.39503	0.064	0.049	1
Inpp5j	0.367142	0.394538	0.01	0.007	1
Dmtn	0.000653084	0.394501	0.089	0.064	1
Znfx1	0.019155	0.394394	0.085	0.068	1
Pced1b	0.00720845	0.394288	0.066	0.049	1
Rtkn	0.566202	0.394146	0.023	0.02	1
Zdhhc20	7.1736e-23	0.693937	0.349	0.231	1.43364e-18
Ppp1r13b	0.0269302	0.393792	0.069	0.054	1
Abr	7.46933e-23	-0.950782	0.128	0.214	1.49275e-18
Daglb	1.00575e-05	0.393547	0.18	0.137	0.201
Fhdc1	7.50229e-23	-2.22955	0.011	0.043	1.49933e-18
Gm17455	0.288992	0.393467	0.011	0.009	1
Mthfd1l	0.198211	0.393425	0.019	0.015	1
Pter	0.0431341	0.393405	0.066	0.053	1
Zfp398	0.000184512	0.39315	0.122	0.09	1
Mcm3ap	0.019444	0.392887	0.061	0.047	1
Stat3	7.516e-23	-0.657455	0.261	0.367	1.50207e-18
Abi3	0.0191732	0.392153	0.043	0.031	1
Slc25a5	9.72366e-23	-0.374616	0.797	0.82	1.94327e-18
Tctn1	0.0488508	0.39176	0.039	0.029	1
Lypd1	1.02413e-22	-3.52789	0.003	0.024	2.04672e-18
Rps28	1.02832e-22	-0.242219	0.932	0.97	2.05511e-18
Tars2	0.0241354	0.391434	0.07	0.056	1
Kctd12	1.12e-22	-1.3712	0.032	0.083	2.23832e-18
Megf8	0.0617349	0.391069	0.074	0.062	1
Smim1	1.20156e-22	-1.09912	0.091	0.166	2.40132e-18
Gli3	0.848738	0.390338	0.019	0.02	1
Tnpo1	0.000115265	0.389943	0.197	0.159	1
Pcx	0.112961	0.389681	0.017	0.012	1
Wfikkn2	0.13898	0.389475	0.021	0.016	1
Stx16	5.64304e-05	0.389443	0.195	0.154	1
Sharpin	0.000197346	0.389395	0.171	0.134	1
Gm16845	0.353654	0.389311	0.018	0.015	1
Clic4	1.20986e-22	0.224159	0.938	0.905	2.4179e-18
Tango6	0.0207804	0.389185	0.046	0.033	1
1700086O06Rik	0.187362	0.389091	0.019	0.015	1
Sphkap	1.48846e-22	1.47997	0.12	0.041	2.97469e-18
Dgcr8	0.00312885	0.388695	0.087	0.066	1
Abhd11	0.000605704	0.388507	0.147	0.116	1
Ascc3	0.000211347	0.387965	0.179	0.144	1
Dcbld1	0.236253	0.387944	0.014	0.011	1
Fbxo34	0.0172855	0.387942	0.087	0.07	1
Crybb3	1.58361e-22	-1.54314	0.023	0.067	3.16485e-18
Itgb3	2.11423e-22	1.24317	0.192	0.098	4.22528e-18
Proser3	0.101273	0.387322	0.036	0.028	1
Vezt	0.0350528	0.387281	0.078	0.064	1
Camkmt	0.194661	0.387239	0.01	0.007	1
Stim2	4.57951e-05	0.387083	0.143	0.105	0.915216
Sp140	6.5141e-05	0.386343	0.096	0.066	1
March9	0.00791204	0.386292	0.049	0.034	1
Stk26	0.00230052	0.386064	0.066	0.047	1
1700048O20Rik	0.076263	0.385935	0.021	0.014	1
Epm2aip1	0.0933996	0.385826	0.081	0.07	1
Tnk2	0.000570358	0.38579	0.162	0.13	1
Sorcs2	2.46406e-22	-3.12876	0.002	0.022	4.92442e-18
Slc38a9	0.000763919	0.385517	0.089	0.064	1
Sgsh	0.00588813	0.385514	0.052	0.037	1
Sfi1	0.000969225	0.385172	0.095	0.07	1
Ltbp2	2.77578e-22	1.41711	0.148	0.062	5.54739e-18
Rapgef2	1.40052e-05	0.384881	0.15	0.11	0.279894
Bend7	0.0543701	0.384755	0.035	0.026	1
mt-Nd6	2.01929e-05	0.384602	0.182	0.14	0.403554
Cipc	0.0142058	0.384583	0.073	0.057	1
Chd2	0.000162696	0.384428	0.168	0.132	1
Ttll4	0.300323	0.384301	0.02	0.016	1
Pde4dip	2.89571e-22	0.656959	0.39	0.271	5.78708e-18
Hif1an	0.0258457	0.384025	0.048	0.036	1
Pdlim2	2.90014e-22	-0.641812	0.422	0.51	5.79593e-18
Cstf2t	0.00152321	0.383711	0.089	0.066	1
Casq1	2.98615e-22	2.31246	0.096	0.026	5.96782e-18
Podxl2	3.01151e-22	0.88578	0.264	0.158	6.0185e-18
Pcyox1l	3.03253e-22	0.740525	0.314	0.2	6.06052e-18
Rogdi	0.000243124	0.383088	0.149	0.116	1
Nob1	0.00123985	0.383054	0.142	0.113	1
Slc8a1	0.00160165	0.382861	0.089	0.065	1
Alg8	0.104989	0.382525	0.023	0.016	1
Yod1	9.33602e-05	0.382188	0.175	0.137	1
Mansc1	0.00275218	0.38197	0.092	0.069	1
Sgsm3	0.00280227	0.38195	0.053	0.036	1
Mest	3.37446e-22	-2.9283	0.003	0.024	6.74386e-18
Aff4	3.40212e-22	0.550288	0.493	0.375	6.79913e-18
Kbtbd7	0.0282744	0.381399	0.054	0.041	1
Ankrd13a	0.00020354	0.381203	0.164	0.128	1
Per3	0.208569	0.381203	0.067	0.059	1
Smim20	3.36192e-06	0.381195	0.235	0.184	0.067188
Armc9	0.0255629	0.380825	0.054	0.041	1
Dcxr	0.00054164	0.380805	0.142	0.112	1
Golim4	4.02897e-22	0.437636	0.624	0.513	8.0519e-18
Alg9	0.0362752	0.380665	0.053	0.041	1
Rnf26	0.0771728	0.380509	0.068	0.057	1
Snx8	0.108267	0.380504	0.03	0.023	1
Cenpk	0.17153	0.380349	0.01	0.006	1
Dffa	0.0499999	0.380185	0.031	0.023	1
Sec24a	0.00651395	0.38012	0.155	0.131	1
Tmem136	0.000235023	0.380029	0.16	0.125	1
Zfp329	0.000145574	0.380024	0.169	0.132	1
Xdh	4.08036e-22	-2.47893	0.004	0.026	8.15459e-18
Dhtkd1	0.548967	0.379948	0.014	0.012	1
Etv1	1.3488e-05	0.379791	0.197	0.151	0.269558
Cep97	0.171032	0.379642	0.034	0.027	1
Gpc3	4.35017e-22	0.653354	0.429	0.309	8.69382e-18
Wisp2	4.55269e-22	-0.94198	0.233	0.33	9.09854e-18
Dhx57	0.0642052	0.379483	0.055	0.044	1
Fkbp15	0.00384119	0.379456	0.064	0.045	1
Fbxo10	0.121385	0.379421	0.02	0.015	1
Gm26632	0.514456	0.378887	0.022	0.02	1
Prx	0.168343	0.378784	0.02	0.015	1
Mbd4	0.177699	0.378604	0.027	0.022	1
Phc3	3.7708e-05	0.377854	0.193	0.15	0.753594
Cyb561d2	0.00801305	0.377788	0.082	0.063	1
B3gntl1	0.283916	0.377702	0.017	0.014	1
Npdc1	4.79317e-22	0.377574	0.719	0.63	9.57915e-18
Cercam	5.61043e-22	0.598501	0.461	0.344	1.12124e-17
Vegfd	5.71038e-22	-2.61901	0.017	0.056	1.14122e-17
2510002D24Rik	0.000249003	0.376704	0.203	0.167	1
Lrrc14	0.0107538	0.376445	0.076	0.059	1
Ndufb9	6.01764e-22	-0.279874	0.832	0.875	1.20262e-17
Lbp	6.25011e-22	-2.24048	0.012	0.046	1.24908e-17
Atf6	0.000636864	0.376052	0.128	0.098	1
Ankrd39	0.000588026	0.376013	0.211	0.179	1
Vcpip1	0.00362635	0.375901	0.159	0.133	1
Lrfn3	0.0286963	0.375711	0.039	0.028	1
9330179D12Rik	0.245689	0.375385	0.027	0.022	1
Pigs	0.000242932	0.375308	0.128	0.096	1
Zfp280b	0.36501	0.375014	0.021	0.018	1
Prmt6	0.105525	0.374963	0.042	0.034	1
Dmxl1	8.59171e-05	0.374766	0.192	0.152	1
Helb	0.108359	0.374543	0.033	0.026	1
Vwc2	6.44672e-22	1.25241	0.162	0.074	1.28838e-17
Cd320	0.00200642	0.37404	0.128	0.102	1
Dock7	1.48748e-05	0.373633	0.223	0.176	0.297273
[truncated: 6,927 more rows]

## Sheet: VSMC2.cluster_def_markers_mus
	p_val	avg_log2FC	pct.1	pct.2	p_val_adj
Olfr558	0	10.5216	0.174	0	0
Pgam2	0	4.40746	0.405	0.034	0
Thbs1	0	4.00648	0.55	0.052	0
Gja4	0	3.96173	0.393	0.041	0
Pln	0	3.26169	0.534	0.157	0
AC154546.2	1.34146e-05	-3.95378	0.001	0.012	0.268091
Col8a1	0	3.1468	0.36	0.054	0
Enpep	0	3.08256	0.567	0.11	0
Cd6	2.91009e-05	-3.72866	0.001	0.011	0.581582
C1s1	0	2.82712	0.59	0.134	0
Palld	0	2.72208	0.862	0.484	0
Zfp984	9.66238e-05	-3.51986	0.001	0.01	1
Tmem176b	0	2.21859	0.628	0.166	0
Mustn1	0	1.32664	0.978	0.879	0
Crip1	0	1.17338	0.997	0.99	0
Fhl2	2.88891e-304	2.26548	0.578	0.192	5.77348e-300
Nr2f2	9.78957e-287	2.07799	0.752	0.399	1.95645e-282
Tfap2b	0.000306324	-3.32774	0.001	0.01	1
Tmem215	3.4716e-285	3.73336	0.236	0.019	6.93798e-281
Notch3	2.19147e-266	3.0063	0.377	0.08	4.37965e-262
Sncg	7.04247e-261	3.32926	0.34	0.065	1.40744e-256
Naalad2	2.68498e-241	3.22865	0.243	0.029	5.36594e-237
Tmem176a	1.30453e-238	2.57306	0.336	0.067	2.6071e-234
Gng11	5.89793e-234	1.76819	0.673	0.327	1.1787e-229
Olfr328	3.15845e-05	-3.08685	0.001	0.012	0.631217
Ckb	2.203e-221	1.56006	0.837	0.6	4.4027e-217
Cpxm2	4.52238e-220	3.17957	0.261	0.041	9.03797e-216
Mrps6	6.05152e-217	1.52758	0.753	0.44	1.2094e-212
Sorbs2	7.07136e-212	2.40798	0.733	0.533	1.41321e-207
Dnah7b	0.000154174	-3.0196	0.002	0.012	1
Ndrg1	1.83054e-210	1.83292	0.583	0.252	3.65834e-206
Corin	2.23855e-206	2.54091	0.326	0.074	4.47375e-202
Tmem229b	0.000262409	-2.93623	0.002	0.012	1
Adra1a	1.69341e-05	-2.90689	0.002	0.014	0.338429
Gm14964	1.41253e-05	-2.90464	0.004	0.018	0.282293
Gpr4	0.00019928	-2.90128	0.003	0.013	1
Hes1	7.66847e-201	2.08432	0.594	0.272	1.53254e-196
Ier2	2.36858e-200	1.05199	0.843	0.54	4.7336e-196
Gadd45b	3.4352e-198	1.64401	0.694	0.389	6.86524e-194
Sept11	1.97493e-197	1.91229	0.514	0.198	3.94689e-193
Tsc22d3	2.36818e-195	2.26139	0.462	0.164	4.73281e-191
Trim2	2.01342e-192	2.34271	0.34	0.087	4.02382e-188
Scube1	6.1599e-05	-2.78595	0.002	0.012	1
S1pr3	2.31815e-190	5.80096	0.113	0.002	4.63281e-186
Pcolce	6.16931e-189	2.24215	0.481	0.185	1.23294e-184
C1ra	4.78022e-187	1.93263	0.462	0.168	9.55327e-183
Rasd1	2.42098e-181	3.15664	0.221	0.035	4.83832e-177
Cfh	9.28296e-177	1.16498	0.899	0.708	1.8552e-172
Ftl1	8.07509e-176	0.9931	0.929	0.828	1.61381e-171
Junb	1.87527e-175	0.877919	0.935	0.699	3.74773e-171
Ntn4	2.85498e-173	2.36088	0.351	0.103	5.70569e-169
Ier3	1.77697e-168	1.34016	0.715	0.434	3.55127e-164
Id3	2.84845e-164	1.03597	0.971	0.929	5.69263e-160
Sertad1	8.89816e-163	1.47581	0.636	0.34	1.7783e-158
Mkx	1.79813e-161	4.42783	0.11	0.005	3.59357e-157
Lpl	2.85591e-161	3.26234	0.2	0.033	5.70754e-157
Egr1	3.23349e-161	0.969024	0.897	0.642	6.46213e-157
Cd93	6.80261e-157	3.80387	0.141	0.013	1.3595e-152
Rab9b	0.000277112	-2.54642	0.002	0.011	1
Ppp1r15a	9.51127e-155	1.33475	0.741	0.471	1.90083e-150
Isl1	7.63873e-06	-2.51912	0.006	0.022	0.15266
Cdh18	5.19124e-06	-2.49619	0.004	0.019	0.103747
Kcna5	1.10754e-152	4.03574	0.123	0.009	2.21341e-148
Apoe	1.8375e-150	2.67256	0.534	0.279	3.67224e-146
Gucy2g	2.60408e-147	4.45239	0.109	0.006	5.20425e-143
Pgf	3.42479e-147	3.96277	0.126	0.011	6.84445e-143
Crim1	1.9986e-146	1.44263	0.665	0.424	3.99419e-142
4930417O22Rik	8.71219e-06	-2.46566	0.004	0.019	0.174113
Rtn4rl1	3.49838e-146	2.81035	0.185	0.03	6.99152e-142
Gprc5c	1.04167e-145	5.02139	0.09	0.002	2.08177e-141
Bicc1	2.14393e-144	3.1786	0.163	0.023	4.28465e-140
Msx1	6.46243e-144	2.07576	0.372	0.133	1.29152e-139
Igfbp4	1.96295e-142	1.44916	0.693	0.441	3.92295e-138
Pkig	1.18767e-137	0.956702	0.841	0.686	2.37356e-133
Slc24a4	0.000454483	-2.40495	0.002	0.011	1
Ubb	2.49127e-135	0.440598	0.999	0.996	4.97881e-131
Gucy1a1	6.34495e-135	0.9469	0.883	0.756	1.26804e-130
B430010I23Rik	4.28401e-06	-2.36649	0.003	0.017	0.085616
Ndufa4l2	1.65266e-132	5.03333	0.112	0.009	3.30285e-128
Ly6g6d	4.83149e-06	-2.3451	0.005	0.021	0.0965574
Cdkn2c	5.68025e-130	1.84462	0.329	0.11	1.1352e-125
Prrx1	8.75604e-129	1.37936	0.552	0.288	1.74989e-124
Tmem51	1.17016e-126	2.1615	0.27	0.078	2.33857e-122
Nr4a1	6.80498e-125	1.05152	0.75	0.503	1.35998e-120
Calm2	1.40227e-122	0.55123	0.981	0.972	2.80243e-118
Map2	1.20784e-120	2.81529	0.158	0.027	2.41387e-116
H3f3b	1.0059e-118	0.525784	0.997	0.991	2.0103e-114
Mybpc2	5.53451e-05	-2.26937	0.003	0.016	1
Pcdh1	4.06228e-118	5.19033	0.078	0.003	8.11847e-114
Bex4	1.23224e-117	2.22039	0.315	0.115	2.46263e-113
Serpinf1	2.28732e-117	2.5145	0.398	0.176	4.57121e-113
Gdf10	4.72476e-117	2.39858	0.208	0.049	9.44242e-113
Mlf1	1.66488e-116	2.1894	0.243	0.068	3.32725e-112
Mhrt	0.00365351	-2.23381	0.003	0.01	1
Epb41	2.86176e-116	1.63985	0.403	0.174	5.71922e-112
Vtcn1	4.0124e-05	-2.19974	0.002	0.014	0.801877
Spsb4	6.12662e-06	-2.19169	0.007	0.024	0.12244
Rcor2	0.000367461	-2.17985	0.005	0.015	1
Ifitm3	9.22882e-116	0.831367	0.889	0.794	1.84438e-111
Ptger3	5.07973e-115	4.47768	0.081	0.004	1.01518e-110
A630023A22Rik	0.000376896	-2.1414	0.003	0.012	1
Tdrp	4.01232e-06	-2.13106	0.006	0.022	0.0801862
Sypl2	0.000228891	-2.09761	0.003	0.013	1
Nkain2	0.000218926	-2.09248	0.002	0.012	1
Egr2	9.09252e-115	2.45761	0.147	0.024	1.81714e-110
Krt8	0.000233863	-2.09085	0.003	0.014	1
Dlx6os1	0.000383379	-2.0863	0.003	0.012	1
Nlrp10	0.000773094	-2.08175	0.002	0.011	1
Chrna1	3.96886e-05	-2.07576	0.003	0.015	0.793177
2210010C04Rik	0.00179917	-2.07039	0.003	0.011	1
Epas1	4.71608e-114	1.12583	0.628	0.368	9.42508e-110
Hspa8	2.70308e-113	0.608459	0.99	0.977	5.4021e-109
Rab33a	0.000258537	-2.06431	0.004	0.015	1
Aspn	2.17421e-112	1.04688	0.716	0.472	4.34517e-108
Nid1	2.26339e-112	2.57763	0.165	0.032	4.52339e-108
Fgf7	8.12665e-112	3.04675	0.131	0.019	1.62411e-107
Pde1a	1.27278e-111	1.73106	0.352	0.14	2.54365e-107
3110079O15Rik	6.38978e-06	-2.04249	0.003	0.018	0.1277
Higd1b	8.1984e-111	7.72881	0.061	0.001	1.63845e-106
Rspo1	1.09123e-110	6.0173	0.065	0.001	2.18082e-106
Gm13861	4.85029e-110	2.69729	0.216	0.058	9.69331e-106
Hoxaas3	1.11355e-05	-2.02682	0.004	0.018	0.222542
Ccdc3	1.00743e-109	1.05955	0.737	0.543	2.01335e-105
Dgkb	2.34282e-108	1.79888	0.309	0.112	4.68212e-104
Prss23	8.71684e-108	0.924283	0.861	0.731	1.74206e-103
Farp1	3.21102e-107	2.99255	0.116	0.015	6.41722e-103
Adamts1	4.12837e-107	1.32666	0.622	0.386	8.25056e-103
Rap1a	5.77043e-105	0.821715	0.837	0.75	1.15322e-100
Nrip2	8.75062e-104	4.5119	0.086	0.007	1.74881e-99
D830026I12Rik	0.000611704	-1.96239	0.005	0.015	1
Abca8a	1.4621e-102	3.5292	0.12	0.018	2.92201e-98
Ptchd4	0.000106	-1.95548	0.002	0.013	1
Tbxas1	0.000336801	-1.95012	0.002	0.012	1
C77080	0.00109463	-1.94641	0.005	0.014	1
Ptma	5.50466e-102	0.386912	0.999	0.993	1.10011e-97
Slc5a3	8.4697e-102	1.67661	0.317	0.121	1.69267e-97
Wisp1	9.43258e-102	2.32422	0.154	0.031	1.8851e-97
Hoxb5	0.000659611	-1.9115	0.002	0.01	1
Gm49322	0.000968513	-1.90971	0.003	0.012	1
Sbspon	1.79498e-101	2.44506	0.2	0.053	3.58726e-97
Gm16485	0.00355665	-1.89827	0.003	0.011	1
Dlx6	0.000531334	-1.88939	0.007	0.018	1
Srpx	5.87811e-101	3.23623	0.121	0.018	1.17474e-96
Klf4	4.03983e-99	1.06545	0.556	0.315	8.07359e-95
Cygb	1.19144e-98	3.60002	0.195	0.054	2.38109e-94
Susd2	4.80542e-98	2.01786	0.257	0.087	9.60363e-94
Jun	1.82026e-96	0.624041	0.901	0.821	3.63779e-92
Pik3r6	8.53544e-05	-1.86908	0.005	0.017	1
Klf2	1.42495e-94	0.804527	0.669	0.426	2.84777e-90
Gm17218	5.05997e-05	-1.85549	0.003	0.016	1
Rbm20	3.80819e-05	-1.85213	0.01	0.026	0.761066
Unc5d	0.00029754	-1.85196	0.005	0.016	1
Arc	2.22458e-94	2.1643	0.158	0.035	4.44582e-90
Ebf1	2.49568e-94	0.729007	0.897	0.787	4.98761e-90
Eif1	1.12475e-93	0.264944	1	0.999	2.24782e-89
Cox8a	1.30077e-93	0.445664	0.98	0.958	2.59959e-89
Cited2	8.45021e-93	1.22189	0.556	0.336	1.68877e-88
Alkal2	1.56262e-92	6.44216	0.055	0.001	3.1229e-88
Dusp1	3.88379e-92	0.517684	0.919	0.806	7.76175e-88
Cd34	1.37824e-91	1.82276	0.272	0.099	2.75442e-87
Tcf21	4.6024e-91	2.91018	0.164	0.04	9.19789e-87
Zfp36	2.64212e-90	0.773346	0.719	0.477	5.28028e-86
Ier5	9.10744e-89	0.875505	0.653	0.455	1.82012e-84
Slc6a7	1.21699e-05	-1.80463	0.009	0.025	0.243215
Igfbp5	1.32352e-86	2.57321	0.283	0.113	2.64505e-82
Scn7a	2.07841e-85	3.83035	0.077	0.007	4.1537e-81
Fosb	1.10108e-84	0.679866	0.522	0.273	2.2005e-80
Bmp2	1.40899e-84	1.81602	0.245	0.087	2.81587e-80
Tnfsf9	2.41693e-84	2.50551	0.157	0.039	4.83024e-80
Tob1	3.21666e-84	1.07691	0.678	0.517	6.42849e-80
Irf1	7.11251e-84	1.76314	0.311	0.131	1.42143e-79
Tbx2	1.83161e-83	2.05605	0.214	0.069	3.66048e-79
Eif2c5	0.00502628	-1.76857	0.004	0.011	1
Tuba1a	2.43308e-82	0.966295	0.718	0.564	4.86251e-78
Cdc42ep3	4.03349e-82	0.858611	0.798	0.695	8.06093e-78
Gm16701.1	2.47944e-05	-1.75433	0.006	0.021	0.495516
Lims1	1.55674e-81	0.983743	0.601	0.407	3.11114e-77
Ddx5	2.97445e-81	0.440278	0.969	0.953	5.94444e-77
Actg1	4.57216e-81	0.315157	0.998	0.999	9.13745e-77
Gm13889	6.63173e-81	0.708171	0.887	0.804	1.32535e-76
Tmem44	0.0105235	-1.73495	0.003	0.01	1
Lum	1.0492e-80	1.89055	0.394	0.211	2.09683e-76
Fxyd6	2.36285e-80	1.91272	0.165	0.044	4.72216e-76
Dpt	4.32166e-80	3.16282	0.176	0.052	8.63683e-76
Ccnd1	4.53989e-80	2.36084	0.155	0.04	9.07297e-76
Gm8797	5.31681e-80	0.539578	0.943	0.871	1.06256e-75
Ptp4a3	2.74698e-79	1.10719	0.686	0.532	5.48984e-75
Fos	4.09315e-79	0.37248	0.952	0.781	8.18015e-75
Gm12840	4.24856e-79	1.27292	0.711	0.572	8.49074e-75
Ccdc65	6.27756e-05	-1.69409	0.003	0.015	1
Daam2	7.92659e-79	2.68633	0.107	0.019	1.58413e-74
Phactr3	1.35175e-05	-1.68254	0.007	0.023	0.270147
Igsf9	0.0131551	-1.68202	0.005	0.011	1
Gm15998	0.00273169	-1.68153	0.003	0.01	1
Flrt3	8.46821e-06	-1.67512	0.01	0.028	0.169237
Ppm1l	9.45767e-79	2.87278	0.107	0.019	1.89012e-74
Rarres1	3.60461e-78	2.10312	0.195	0.062	7.20382e-74
Zfp108	0.00454615	-1.66166	0.004	0.011	1
Parm1	1.03932e-77	1.73074	0.258	0.101	2.07709e-73
Tmem25	3.20797e-05	-1.65896	0.005	0.018	0.641112
Plk2	9.61355e-77	1.55902	0.22	0.074	1.92127e-72
Olfr78	2.57329e-76	6.6205	0.043	0.001	5.14273e-72
Frmd8os	0.00518466	-1.63973	0.005	0.012	1
Lrtm2	0.000467808	-1.63802	0.002	0.011	1
Dnah5	0.00277597	-1.63485	0.006	0.015	1
Gm15867	2.63687e-76	2.14016	0.141	0.034	5.26978e-72
Prex1	0.00277333	-1.6287	0.006	0.015	1
Cyr61	8.2635e-76	0.540424	0.832	0.643	1.65146e-71
Nxph3	0.00872743	-1.61002	0.003	0.01	1
Itpk1	1.07137e-75	1.29386	0.415	0.227	2.14112e-71
Acta1	3.16791e-75	5.55202	0.052	0.002	6.33106e-71
Ogn	1.45996e-74	0.668906	0.887	0.847	2.91773e-70
Myo1b	6.75584e-74	5.64945	0.043	0.001	1.35015e-69
Gpm6b	9.27615e-74	3.19404	0.082	0.011	1.85384e-69
H2afz	1.28027e-73	0.658962	0.868	0.781	2.55861e-69
Atpif1	1.33169e-73	0.669248	0.871	0.812	2.66138e-69
Kif26b	1.1602e-05	-1.57436	0.011	0.03	0.231866
Kcnq5	0.000592583	-1.55957	0.007	0.018	1
Sertad4	1.39075e-73	2.46737	0.106	0.02	2.77941e-69
Ngf	6.22312e-72	5.14972	0.048	0.002	1.24369e-67
Dcn	7.23846e-72	2.67983	0.596	0.439	1.44661e-67
Mamdc2	9.28769e-72	2.26967	0.146	0.039	1.85615e-67
Rpl27a	1.11498e-71	0.411248	0.98	0.952	2.22829e-67
Gm34829	1.30699e-71	4.25876	0.053	0.003	2.61202e-67
Hspb1	1.61968e-71	0.854148	0.952	0.948	3.23693e-67
Pnrc1	6.42293e-71	0.573958	0.888	0.823	1.28362e-66
Ebf2	7.61417e-71	4.73761	0.047	0.002	1.52169e-66
Ier5l	2.85374e-70	1.13608	0.361	0.178	5.70319e-66
Rnf152	5.6705e-69	2.54372	0.105	0.021	1.13325e-64
Id2	1.1308e-68	0.848528	0.76	0.635	2.2599e-64
Alx1	4.0829e-05	-1.51473	0.012	0.03	0.815967
Aldh1l1	0.00965593	-1.50789	0.003	0.01	1
Gm32036	7.00108e-05	-1.50297	0.009	0.024	1
Zeb2	1.75494e-68	1.3238	0.478	0.292	3.50724e-64
Serping1	4.25461e-68	1.10706	0.762	0.667	8.50284e-64
Limd1	1.00702e-67	1.03667	0.466	0.272	2.01252e-63
Tmem26	2.93849e-05	-1.49135	0.011	0.028	0.587258
Itm2b	1.98526e-67	0.323239	0.997	0.996	3.96754e-63
Raph1	6.7053e-67	1.33739	0.321	0.154	1.34005e-62
Rnd3	9.58941e-67	0.99595	0.554	0.371	1.91644e-62
Aqp11	0.00131423	-1.47979	0.006	0.015	1
Tgfb3	3.53511e-66	1.24746	0.5	0.326	7.06492e-62
Pde10a	3.77421e-66	3.095	0.072	0.009	7.54276e-62
Hoxa1	9.11523e-06	-1.46943	0.007	0.023	0.182168
Ppfia4	0.00290585	-1.46832	0.009	0.018	1
Dgkg	1.45815e-65	2.48858	0.1	0.02	2.9141e-61
Gm10516	0.00820023	-1.46782	0.004	0.011	1
Rflnb	2.19798e-65	2.26502	0.126	0.032	4.39267e-61
Gm15721	0.00146892	-1.46333	0.002	0.01	1
Rpusd2	0.00558289	-1.4591	0.004	0.011	1
Btg2	1.26219e-64	0.416273	0.914	0.798	2.5225e-60
Gm8113	0.00401905	-1.45881	0.006	0.014	1
Gm21987	0.00401774	-1.45609	0.006	0.015	1
Atf3	1.28524e-64	0.733375	0.689	0.514	2.56856e-60
Ms4a4d	1.32907e-64	3.97275	0.058	0.005	2.65615e-60
Syt3	0.00381163	-1.44164	0.004	0.012	1
D430036J16Rik	1.60568e-05	-1.43342	0.006	0.021	0.320896
Icam1	3.23647e-64	3.0847	0.092	0.017	6.46808e-60
Ddit4	4.95452e-64	1.43442	0.218	0.084	9.90161e-60
Kcnj12	2.77365e-63	3.18804	0.064	0.007	5.54313e-59
Cp	3.99853e-63	1.49313	0.234	0.095	7.99107e-59
Hoxa2	3.08257e-06	-1.42619	0.011	0.031	0.0616051
Gpx3	8.21729e-63	3.06328	0.154	0.048	1.64223e-58
Rpa1	9.60761e-63	1.36401	0.309	0.15	1.92008e-58
Cdh4	0.0046847	-1.42144	0.005	0.012	1
Id1	1.15677e-61	0.851814	0.671	0.501	2.3118e-57
Tbx20	1.37769e-61	1.41081	0.258	0.111	2.75331e-57
G0s2	2.29477e-61	3.13854	0.073	0.011	4.5861e-57
Gata4	2.80135e-61	1.42509	0.224	0.089	5.59851e-57
Gpr20	8.24692e-61	4.31693	0.048	0.003	1.64815e-56
Nrarp	1.1536e-60	4.38441	0.047	0.003	2.30546e-56
Lxn	1.73591e-60	1.20566	0.467	0.303	3.46923e-56
Slc10a6	3.37559e-60	1.84611	0.163	0.053	6.74612e-56
Trpm3	0.00056383	-1.39716	0.007	0.019	1
Myadml2	0.0002104	-1.39659	0.008	0.021	1
Mafb	7.54357e-59	1.40241	0.192	0.071	1.50758e-54
Cdkn1a	9.70878e-59	1.0985	0.449	0.278	1.9403e-54
Slc11a1	2.0389e-58	3.3551	0.068	0.01	4.07473e-54
Mapt	6.69606e-05	-1.38023	0.011	0.028	1
Dlc1	2.40008e-58	0.956243	0.47	0.289	4.79656e-54
Afap1l2	1.09527e-57	3.62825	0.052	0.005	2.18891e-53
Socs3	1.18728e-57	0.607891	0.454	0.26	2.37278e-53
H2afx	1.26857e-57	1.23219	0.314	0.159	2.53524e-53
Steap4	2.38011e-57	3.39817	0.061	0.008	4.75665e-53
Adamtsl1	3.76623e-57	1.76414	0.097	0.021	7.52681e-53
Dnaja1	4.28186e-57	0.716655	0.763	0.661	8.5573e-53
Ramp2	4.41558e-57	2.80455	0.085	0.016	8.82453e-53
Kcnt2	1.38905e-56	1.65883	0.16	0.054	2.77602e-52
Nrap	0.00256176	-1.35438	0.006	0.015	1
Errfi1	1.42352e-56	0.84111	0.761	0.639	2.8449e-52
Tuba1b	3.05669e-56	0.669136	0.725	0.592	6.1088e-52
Ociad2	4.89216e-56	3.32626	0.061	0.008	9.77698e-52
Gm45184	0.00621423	-1.35256	0.007	0.015	1
Pdlim3	5.65152e-56	0.47878	0.919	0.904	1.12946e-51
Pigz	0.000413555	-1.32879	0.01	0.023	1
Emp1	5.68918e-56	1.7629	0.178	0.066	1.13698e-51
Prkar1a	1.68359e-55	0.470023	0.932	0.894	3.36466e-51
Synm	3.82507e-55	1.13037	0.368	0.209	7.64439e-51
Zbtb7c	4.02103e-55	2.27241	0.082	0.016	8.03602e-51
Tmsb10	4.49208e-55	0.796018	0.835	0.759	8.97742e-51
Ildr2	4.30009e-54	3.53592	0.048	0.004	8.59373e-50
Nr4a2	5.45768e-54	1.55653	0.275	0.134	1.09072e-49
Hbegf	6.62229e-54	1.14228	0.416	0.254	1.32347e-49
Zfp773	0.00535738	-1.31427	0.005	0.013	1
Sdc3	7.67347e-54	1.25944	0.236	0.103	1.53354e-49
Ston2	4.37934e-05	-1.31115	0.011	0.028	0.875211
Serpinb1a	1.41022e-53	2.18301	0.103	0.025	2.81832e-49
Ccdc152	0.00204977	-1.30643	0.009	0.02	1
Esam	2.05643e-53	1.35475	0.247	0.113	4.10978e-49
Gm26724	4.15951e-06	-1.30429	0.018	0.04	0.0831278
P4ha3	2.47502e-53	2.69929	0.066	0.01	4.94633e-49
Adam11	0.00448187	-1.29953	0.005	0.013	1
Chn2	3.38093e-53	2.46466	0.077	0.014	6.7568e-49
Nfkbia	6.275e-53	0.802473	0.689	0.562	1.25406e-48
Btg1	3.15404e-52	0.516178	0.871	0.799	6.30336e-48
Notch1	3.2273e-52	2.06	0.104	0.026	6.44977e-48
Zc3h12b	7.87934e-06	-1.29591	0.023	0.046	0.157469
Snai1	4.2263e-52	2.40212	0.074	0.014	8.44625e-48
Igfbp3	5.50656e-52	3.98022	0.07	0.012	1.10049e-47
Zfp991	0.0246193	-1.2858	0.005	0.011	1
Cds1	0.00094075	-1.28325	0.011	0.023	1
Fbxw10	6.79809e-05	-1.27989	0.015	0.032	1
Cald1	1.09826e-51	0.305693	0.997	0.996	2.19487e-47
Clec3b	3.94974e-51	2.79113	0.192	0.082	7.89356e-47
Asah2	0.0156299	-1.26807	0.006	0.012	1
Dnajb1	7.19134e-51	1.02657	0.432	0.272	1.43719e-46
Atp1b2	1.81385e-50	1.00803	0.441	0.285	3.62498e-46
Itm2a	4.8403e-50	2.14371	0.094	0.023	9.67334e-46
Nxnl2	5.14955e-50	2.64861	0.065	0.011	1.02914e-45
Ch25h	5.36917e-50	3.23024	0.052	0.006	1.07303e-45
Dpep1	7.03768e-50	2.96624	0.102	0.027	1.40648e-45
Nudt10	0.00108884	-1.24472	0.012	0.025	1
Tbx3	1.08265e-49	2.46984	0.074	0.014	2.16367e-45
Oaf	1.54448e-49	1.66824	0.163	0.06	3.08664e-45
Lbh	2.08073e-49	0.669358	0.734	0.608	4.15835e-45
Cycs	2.2437e-49	0.605436	0.777	0.692	4.48404e-45
Bend5	0.000549465	-1.24077	0.007	0.018	1
Sept7	2.73517e-49	0.380082	0.972	0.948	5.46623e-45
Slc9a2	0.00010344	-1.23789	0.012	0.029	1
Kcnq3	0.0322242	-1.23702	0.005	0.011	1
Slc26a6	0.00206605	-1.23509	0.009	0.02	1
Tmem204	5.09747e-49	1.50055	0.172	0.067	1.01873e-44
Rimklb	0.000873977	-1.23385	0.006	0.017	1
Tmem119	5.13333e-49	2.92425	0.077	0.016	1.0259e-44
Ky	0.000676302	-1.22975	0.013	0.027	1
Sh3bp5	5.49901e-49	2.9692	0.061	0.01	1.09898e-44
Ece2	0.0108749	-1.22847	0.004	0.01	1
Serpina3n	5.50258e-49	2.02339	0.114	0.033	1.09969e-44
Ptges3l	6.63271e-49	1.04492	0.38	0.23	1.32555e-44
Abca8b	6.87105e-49	3.47915	0.043	0.004	1.37318e-44
Trim7	5.23822e-06	-1.22085	0.024	0.048	0.104686
Uba2	8.40724e-49	0.815931	0.75	0.665	1.68019e-44
Tnni3k	0.00462698	-1.21564	0.014	0.025	1
Fmn1	0.000272518	-1.21513	0.014	0.029	1
Ndp	0.00118714	-1.21307	0.007	0.018	1
Prrx2	0.0608119	-1.20832	0.039	0.048	1
Dclk1	1.48609e-48	2.15512	0.103	0.028	2.96995e-44
Eml5	0.00197411	-1.20357	0.009	0.019	1
Trpc6	1.78585e-48	7.81398	0.026	0	3.56901e-44
Gm20594	0.00735214	-1.20312	0.003	0.01	1
Usp2	2.42251e-48	2.15206	0.119	0.036	4.84139e-44
Zfp36l2	3.52572e-48	0.5958	0.716	0.582	7.04616e-44
Hmgb2	6.94345e-48	1.1907	0.307	0.165	1.38765e-43
Ltk	0.0120099	-1.20001	0.004	0.01	1
Rftn1	8.06316e-48	1.63852	0.155	0.057	1.61142e-43
Hexim1	1.22459e-47	1.20543	0.254	0.123	2.44735e-43
Art3	1.4908e-47	1.10689	0.31	0.166	2.97937e-43
Pnp	2.43469e-47	1.08534	0.407	0.261	4.86573e-43
Slc46a3	0.0303658	-1.19579	0.005	0.01	1
Csrp1	2.98353e-47	0.333324	0.988	0.991	5.96258e-43
Ppp1r10	3.68764e-47	1.05414	0.423	0.274	7.36975e-43
Brd2	3.98424e-47	0.663332	0.655	0.523	7.9625e-43
Nhlrc1	1.13028e-05	-1.18731	0.016	0.037	0.225886
Cd82	4.70072e-47	1.35826	0.209	0.093	9.39438e-43
Podn	6.57953e-47	3.01711	0.069	0.013	1.31492e-42
Gda	1.75682e-46	3.34941	0.046	0.005	3.511e-42
Slc23a1	0.0147243	-1.18091	0.005	0.011	1
Perm1	0.000169961	-1.18076	0.006	0.018	1
Net1	2.09273e-46	0.998865	0.455	0.302	4.18231e-42
Tigd5	0.000114991	-1.1793	0.007	0.021	1
Trpc3	2.31509e-46	3.42879	0.04	0.003	4.6267e-42
Shd	0.00853595	-1.17296	0.007	0.015	1
Olfml3	2.85922e-46	2.49637	0.087	0.021	5.71415e-42
Rbpms2	8.52016e-46	0.713497	0.685	0.588	1.70275e-41
Gm21083	0.00981173	-1.16221	0.003	0.01	1
Fn3k	0.0309593	-1.16203	0.007	0.013	1
Bend4	0.000294006	-1.16016	0.01	0.024	1
Sox6	2.00307e-45	1.40844	0.168	0.067	4.00313e-41
Dhrs11	7.93631e-06	-1.15671	0.016	0.038	0.158607
Sytl5	0.000253473	-1.15611	0.009	0.022	1
Nebl	0.000162618	-1.15466	0.02	0.039	1
Cmbl	4.32846e-45	1.93946	0.121	0.039	8.65044e-41
Diras2	0.000134524	-1.1506	0.012	0.027	1
Zfp709	0.00713038	-1.1477	0.006	0.013	1
Gadd45g	5.28592e-45	0.722974	0.768	0.699	1.05639e-40
Col19a1	0.000116182	-1.1467	0.017	0.035	1
Cnksr1	0.0278956	-1.14596	0.005	0.01	1
Neurl1b	5.9091e-45	4.26606	0.035	0.002	1.18093e-40
4732414G09Rik	0.00310447	-1.14263	0.012	0.024	1
Ptn	1.06235e-44	2.81196	0.071	0.015	2.1231e-40
Ngb	1.89153e-44	2.46781	0.066	0.013	3.78023e-40
Lbhd1	0.0131143	-1.13907	0.007	0.015	1
Apol7d	0.008551	-1.13628	0.007	0.015	1
Tbx3os1	3.52372e-44	4.96553	0.032	0.002	7.04215e-40
Cth	0.00661775	-1.13331	0.008	0.017	1
Gfra2	4.85263e-44	2.25957	0.079	0.019	9.69798e-40
Ednra	6.23092e-44	1.89607	0.12	0.039	1.24525e-39
Ptger4	9.64629e-44	2.71412	0.049	0.007	1.92781e-39
Rab26	0.000736764	-1.12916	0.006	0.017	1
Actc1	1.99147e-43	3.31491	0.041	0.004	3.97995e-39
S100b	2.30898e-43	2.75613	0.053	0.008	4.61449e-39
Pear1	2.7152e-43	1.55066	0.147	0.055	5.42632e-39
Man1a	2.80421e-43	2.0293	0.096	0.027	5.60422e-39
Socs1	2.93285e-43	1.04571	0.271	0.14	5.8613e-39
Hs3st1	3.74379e-43	2.65855	0.056	0.009	7.48196e-39
Ankrd1	5.61339e-43	2.22597	0.219	0.109	1.12184e-38
Cabp1	6.42335e-43	3.00592	0.048	0.006	1.28371e-38
Abcc10	0.00680192	-1.11914	0.01	0.019	1
Nudt12	9.24167e-05	-1.11008	0.011	0.027	1
Ndst3	0.00444181	-1.10633	0.007	0.016	1
Chchd2	6.84065e-43	0.260831	0.981	0.971	1.3671e-38
Wsb1	7.35609e-43	0.760923	0.495	0.343	1.47011e-38
Abhd2	1.64489e-42	1.00841	0.412	0.27	3.28732e-38
Hopx	2.15408e-42	4.06742	0.04	0.004	4.30494e-38
Ddah1	2.32772e-42	3.97415	0.035	0.003	4.65195e-38
Phldb2	4.79938e-42	0.806289	0.516	0.377	9.59156e-38
Itih5	7.89357e-42	2.50983	0.061	0.012	1.57753e-37
Isyna1	1.24752e-41	0.888231	0.508	0.374	2.49317e-37
Gm7160	0.0271891	-1.09645	0.007	0.014	1
Dnajc28	0.00781012	-1.09548	0.005	0.012	1
Enpp6	1.65874e-41	2.65899	0.056	0.01	3.31498e-37
Gm15445	0.00887042	-1.09362	0.003	0.01	1
Shroom4	0.00118287	-1.09169	0.008	0.019	1
Pparg	0.0031542	-1.08738	0.009	0.019	1
Tnfrsf21	0.000330764	-1.08654	0.007	0.019	1
6720427I07Rik	0.0142888	-1.08462	0.01	0.018	1
Cyp7b1	2.74409e-41	3.60631	0.037	0.004	5.48407e-37
Lsamp	3.97666e-41	2.81299	0.043	0.005	7.94735e-37
Ccdc42os	0.0119413	-1.08018	0.011	0.02	1
Zcchc18	1.20698e-05	-1.08015	0.015	0.036	0.241216
Meox2	3.98217e-41	2.99189	0.051	0.008	7.95837e-37
Ifi27l2a	1.14407e-40	1.95826	0.136	0.051	2.28643e-36
Rps12	3.13392e-40	0.318005	0.969	0.922	6.26314e-36
Cpne8	3.1388e-40	0.977843	0.335	0.197	6.27289e-36
Hrct1	4.02929e-40	1.08282	0.271	0.146	8.05254e-36
Plce1	4.33375e-40	1.34917	0.191	0.087	8.661e-36
Tubb4b	7.99869e-40	0.741947	0.609	0.483	1.59854e-35
Apbb2	2.8687e-39	1.09801	0.274	0.15	5.73309e-35
Ubc	7.44936e-39	0.56274	0.763	0.666	1.48875e-34
Pth1r	7.55789e-39	0.925869	0.34	0.207	1.51045e-34
Cpne5	7.56582e-39	2.56716	0.061	0.013	1.51203e-34
Selenow	8.37164e-39	0.334438	0.939	0.871	1.67307e-34
Gcgr	9.18447e-39	4.84544	0.024	0.001	1.83552e-34
Fau	1.69767e-38	0.216849	0.995	0.99	3.39279e-34
Pcp4l1	2.18999e-38	1.07124	0.531	0.421	4.3767e-34
Igf1	3.42994e-38	1.95791	0.124	0.046	6.85473e-34
Gipc3	0.00574845	-1.042	0.009	0.018	1
Wasf1	0.0240089	-1.03299	0.007	0.013	1
Nanos3	0.00713313	-1.03232	0.005	0.013	1
S100a8	0.632581	-1.03136	0.01	0.011	1
Pla2g16	3.44541e-38	1.06169	0.297	0.172	6.88565e-34
Cobll1	6.84947e-38	1.13258	0.234	0.122	1.36887e-33
D830025C05Rik	1.34879e-37	1.90432	0.065	0.015	2.69556e-33
Map7d2	1.40002e-37	1.07934	0.261	0.143	2.79795e-33
Atp2b1	2.08538e-37	0.743901	0.53	0.397	4.16764e-33
Sox9	2.30791e-37	1.37574	0.12	0.043	4.61236e-33
Lrrc10b	2.70068e-37	2.79561	0.051	0.009	5.39731e-33
As3mt	3.1757e-37	1.46227	0.141	0.056	6.34664e-33
Bhlhe40	4.4625e-37	1.04288	0.185	0.084	8.9183e-33
Tcim	6.41721e-37	1.39434	0.165	0.073	1.28248e-32
Mindy2	6.88811e-37	1.00505	0.27	0.15	1.37659e-32
Tpm1	6.94241e-37	0.286194	0.998	0.998	1.38744e-32
Egflam	1.31711e-36	3.6623	0.031	0.003	2.63224e-32
Astn2	2.26323e-05	-1.01577	0.024	0.046	0.452307
Slc43a3	1.6104e-36	1.12655	0.267	0.149	3.21838e-32
Fst	1.81469e-36	3.16633	0.113	0.041	3.62665e-32
Zfp36l1	2.03186e-36	0.633468	0.717	0.64	4.06067e-32
Faim2	0.0511264	-1.01179	0.008	0.014	1
Pim1	2.26555e-36	0.711894	0.366	0.227	4.52771e-32
Alox12	0.000868423	-1.00829	0.011	0.023	1
Hspa1l	0.000982791	-1.00808	0.023	0.039	1
Rapgef5	2.60708e-36	1.06469	0.295	0.173	5.21026e-32
Slc38a11	3.30444e-36	1.20193	0.224	0.116	6.60393e-32
Ntng1	0.000922863	-1.00725	0.02	0.035	1
Ifi203	3.93273e-36	2.97508	0.042	0.006	7.85957e-32
F13a1	0.0403336	-1.00441	0.007	0.013	1
Rbm38	6.34406e-36	1.10698	0.23	0.12	1.26786e-31
Csrnp1	7.67943e-36	0.691254	0.387	0.246	1.53473e-31
Macrod2	1.355e-05	-1.0008	0.022	0.044	0.270796
Gm3336	7.98508e-36	3.14936	0.031	0.003	1.59582e-31
Gm9951	0.000345681	-0.999344	0.018	0.034	1
Atm	6.38462e-06	-0.997783	0.03	0.056	0.127597
2700046G09Rik	0.0111066	-0.992831	0.004	0.01	1
Slc25a25	9.54644e-36	1.533	0.142	0.059	1.90786e-31
Nrk	0.0140148	-0.991753	0.006	0.013	1
Sorbs1	9.92748e-36	1.00176	0.471	0.351	1.98401e-31
Rbm3	1.08211e-35	0.414542	0.851	0.781	2.16259e-31
Runx1	1.17724e-35	1.61191	0.113	0.041	2.35272e-31
Vstm4	2.1306e-35	1.369	0.18	0.085	4.25801e-31
Aldh1a1	3.66482e-35	2.13294	0.079	0.022	7.32414e-31
Ankrd23	0.00122108	-0.978143	0.005	0.015	1
Cox6c	4.18618e-35	0.254151	0.985	0.962	8.36609e-31
Aacs	2.62096e-06	-0.976886	0.029	0.056	0.0523798
Ddx11	0.0779128	-0.976272	0.006	0.01	1
Efna4	0.0027756	-0.975942	0.003	0.01	1
Hapln3	4.33279e-35	3.49832	0.027	0.002	8.65907e-31
Svep1	4.83862e-35	3.69183	0.029	0.002	9.66999e-31
Gfpt2	5.55062e-35	2.41199	0.077	0.021	1.10929e-30
Lurap1	0.000150368	-0.973558	0.023	0.042	1
Med12l	0.0178074	-0.9725	0.007	0.014	1
Ccl21a	0.549727	-0.971503	0.024	0.021	1
Mdh2	1.14752e-34	0.498496	0.745	0.673	2.29333e-30
Jag1	1.69355e-34	0.874402	0.429	0.298	3.38455e-30
Kbtbd12	0.0611228	-0.968847	0.009	0.015	1
Tesc	2.05472e-34	1.15018	0.319	0.201	4.10635e-30
Tnnt3	0.0517656	-0.96738	0.007	0.013	1
Slc46a1	0.015639	-0.966115	0.014	0.023	1
Alox5ap	0.000217731	-0.963047	0.017	0.034	1
Kcnk3	2.40241e-34	1.50677	0.176	0.083	4.80121e-30
Lrrc32	2.63776e-34	1.58343	0.114	0.042	5.27155e-30
Acat3	0.0644542	-0.959915	0.005	0.01	1
C1qtnf7	3.63794e-34	1.16876	0.254	0.142	7.27043e-30
Eef1a2	0.0261088	-0.957326	0.01	0.017	1
Ppara	0.0226512	-0.956042	0.01	0.017	1
Ppm1h	4.01327e-06	-0.954814	0.036	0.064	0.0802051
2310002D06Rik	0.0457046	-0.951636	0.006	0.012	1
Samd10	1.25675e-05	-0.949343	0.017	0.038	0.251161
Celsr2	0.000387379	-0.947121	0.012	0.027	1
Abcg1	0.0497867	-0.943707	0.005	0.01	1
Ndn	4.04323e-34	1.09287	0.268	0.154	8.0804e-30
Spon1	5.24288e-34	1.51768	0.128	0.051	1.04779e-29
Cenpo	0.00358734	-0.936366	0.009	0.018	1
Rasl11a	9.52877e-34	0.621969	0.712	0.614	1.90433e-29
Hic1	1.02515e-33	3.20785	0.033	0.004	2.04877e-29
Cdkn2a	1.12044e-33	5.12127	0.02	0.001	2.23919e-29
Pim3	1.13785e-33	0.882122	0.298	0.177	2.27398e-29
Osmr	1.63668e-33	1.23592	0.181	0.087	3.27091e-29
Gas7	1.94086e-33	1.7106	0.085	0.026	3.87881e-29
D2hgdh	0.00180315	-0.930985	0.011	0.022	1
Park2	0.00038933	-0.929969	0.023	0.04	1
Rab6b	0.000142374	-0.928478	0.009	0.023	1
Prlr	1.95851e-33	6.27462	0.018	0	3.91408e-29
Rfx2	0.000329604	-0.919565	0.023	0.041	1
Zbtb39	0.00715593	-0.919278	0.011	0.02	1
Scara5	2.56935e-33	2.74337	0.045	0.008	5.13484e-29
Ccdc173	0.00142621	-0.917258	0.022	0.037	1
Zfp428	0.023681	-0.916101	0.012	0.021	1
Soga1	3.02064e-05	-0.915003	0.028	0.051	0.603674
Sgo2a	0.0120157	-0.91464	0.009	0.017	1
Tceal5	1.72221e-05	-0.913666	0.037	0.064	0.344184
Scn3a	3.43397e-33	4.31126	0.028	0.002	6.86278e-29
Tpt1	7.11629e-33	0.241516	0.995	0.981	1.42219e-28
Nrp2	0.000336689	-0.910727	0.019	0.035	1
Dio2	1.13522e-32	3.34638	0.039	0.006	2.26873e-28
Actn4	1.83445e-32	0.364836	0.921	0.902	3.66614e-28
B230312C02Rik	0.0325032	-0.909359	0.007	0.014	1
Hsd11b1	2.42276e-32	3.49106	0.039	0.006	4.84188e-28
Capn9	0.0194548	-0.908555	0.005	0.011	1
Chst3	1.3686e-05	-0.907217	0.037	0.064	0.273514
Gm26808	0.091319	-0.90618	0.006	0.01	1
Prkcd	3.67449e-32	0.585033	0.563	0.446	7.34347e-28
Tubg2	0.0297401	-0.9051	0.005	0.011	1
Lrrtm3	0.101619	-0.904951	0.007	0.012	1
Serpini1	4.49696e-32	0.980625	0.375	0.257	8.98718e-28
Rpl35a	6.30356e-32	0.240609	0.982	0.959	1.25977e-27
Hspa1a	6.39535e-32	0.589518	0.656	0.546	1.27811e-27
Gm26873	0.048945	-0.901232	0.009	0.014	1
Filip1l	1.33888e-31	0.560408	0.845	0.822	2.67575e-27
Kif21a	0.0265789	-0.898579	0.007	0.013	1
Tgfbi	1.95537e-31	2.5029	0.062	0.016	3.90781e-27
Oas1c	0.0153705	-0.896704	0.01	0.018	1
Tpx2	0.0919264	-0.896516	0.011	0.016	1
Lpar1	2.51863e-31	1.88296	0.071	0.02	5.03349e-27
Cmtm3	5.81065e-31	1.98207	0.076	0.023	1.16126e-26
Ccdc60	0.000461644	-0.893582	0.018	0.033	1
Cxcl1	8.84493e-31	3.10333	0.195	0.104	1.76766e-26
Gm29107	0.0218554	-0.889869	0.006	0.013	1
Exoc6	6.96809e-06	-0.889111	0.045	0.075	0.139257
Tnfaip6	1.17009e-30	2.90809	0.061	0.016	2.33843e-26
Blmh	1.28338e-30	0.689807	0.507	0.391	2.56484e-26
Fam241b	0.0192961	-0.885941	0.012	0.021	1
Alms1	0.0026579	-0.885861	0.028	0.044	1
Il33	1.84642e-30	2.34154	0.064	0.017	3.69008e-26
Zfp661	0.174289	-0.883925	0.008	0.012	1
Egr3	2.01413e-30	1.32683	0.097	0.034	4.02525e-26
Flrt1	0.000968056	-0.88106	0.013	0.026	1
Zfp985	0.0265821	-0.879289	0.007	0.013	1
P2ry14	0.00913993	-0.878887	0.01	0.018	1
Susd4	0.00469615	-0.878401	0.006	0.015	1
Gale	0.00231853	-0.878355	0.012	0.024	1
Myh6	0.0932187	-0.878123	0.006	0.011	1
Rin3	0.000242079	-0.878065	0.023	0.041	1
Rasd2	3.05496e-06	-0.877287	0.012	0.033	0.0610534
Hspa1b	2.05148e-30	0.705218	0.683	0.572	4.09989e-26
Rgs11	0.00500463	-0.876562	0.01	0.02	1
Cgref1	3.89459e-05	-0.875448	0.028	0.051	0.778334
Slc12a7	0.00060554	-0.87427	0.02	0.036	1
Nol3	2.64171e-30	1.79741	0.078	0.024	5.27947e-26
Ttll5	2.20423e-05	-0.871289	0.028	0.051	0.440514
Efhc2	3.34333e-05	-0.868479	0.025	0.047	0.668164
Gm47547	0.000397948	-0.866901	0.015	0.03	1
Tmsb15b1	0.00343033	-0.866786	0.015	0.027	1
Lgals9	3.17516e-30	1.98156	0.062	0.016	6.34556e-26
Neil1	0.00178562	-0.865519	0.018	0.031	1
Psme2b	0.00559589	-0.864731	0.006	0.015	1
Asb11	3.78332e-30	3.00225	0.038	0.006	7.56097e-26
Rps20	4.04464e-30	0.220618	0.992	0.987	8.08322e-26
Cavin3	4.10444e-30	0.275052	0.96	0.926	8.20273e-26
Gm17477	0.00733418	-0.860804	0.011	0.021	1
Foxo6	5.30794e-05	-0.859325	0.014	0.031	1
B630019A10Rik	0.0189023	-0.857489	0.007	0.014	1
Rpsa	4.68698e-30	0.220054	0.995	0.979	9.36692e-26
Tril	6.82212e-30	4.02441	0.025	0.002	1.3634e-25
Trim68	7.31727e-30	1.61712	0.09	0.031	1.46236e-25
Tnfrsf23	7.7146e-30	2.20006	0.053	0.012	1.54176e-25
Chek2	0.00116179	-0.852407	0.014	0.028	1
AL591952.3	0.0472679	-0.850763	0.012	0.019	1
Eef1a1	7.82739e-30	0.183815	0.997	0.997	1.5643e-25
Tmem154	0.0112107	-0.848566	0.004	0.01	1
Cst6	0.0542043	-0.846999	0.005	0.01	1
Gm10645	0.109301	-0.846797	0.007	0.012	1
Mamstr	0.0169396	-0.846726	0.006	0.013	1
Pex11a	0.00821135	-0.846664	0.012	0.022	1
Dtx1	0.0277183	-0.845849	0.005	0.01	1
Tbc1d16	1.50647e-05	-0.844813	0.039	0.066	0.301068
Fbxo27	0.000203873	-0.844599	0.027	0.046	1
Vcam1	8.40449e-30	0.883996	0.217	0.118	1.67964e-25
Alpk3	9.5426e-30	2.56413	0.049	0.011	1.90709e-25
Tal1	1.94801e-29	4.72103	0.019	0.001	3.8931e-25
Sfrp1	2.7624e-29	1.17775	0.282	0.175	5.52066e-25
Rsad1	0.00344451	-0.842315	0.023	0.037	1
Zfp872	0.0089205	-0.842213	0.007	0.015	1
Gm48715	3.62318e-29	1.75843	0.065	0.018	7.24093e-25
Rps24	3.95772e-29	0.227528	0.992	0.978	7.90951e-25
Gm9780	0.0327391	-0.839971	0.007	0.014	1
Ankrd13b	0.000158236	-0.838729	0.022	0.04	1
Srp54c	0.0222932	-0.838171	0.009	0.016	1
Rps10	4.91058e-29	0.220283	0.986	0.963	9.81379e-25
Colca2	0.155999	-0.835845	0.007	0.01	1
Myoz1	0.000318791	-0.835504	0.011	0.025	1
Hyal1	6.79209e-06	-0.835042	0.041	0.07	0.13574
Gm17300	5.3653e-29	1.31952	0.088	0.031	1.07226e-24
Gm26910	0.0353665	-0.833347	0.007	0.013	1
Ablim3	7.44476e-29	4.42654	0.016	0	1.48784e-24
Sprn	8.34525e-29	3.37919	0.027	0.003	1.6678e-24
Cmya5	0.02401	-0.831293	0.014	0.023	1
Gjc1	9.58516e-29	0.771911	0.484	0.371	1.91559e-24
Top3a	0.0128341	-0.827496	0.01	0.019	1
Ephx3	1.12563e-28	6.14986	0.016	0	2.24957e-24
Ccnl1	1.42333e-28	0.67121	0.488	0.374	2.84453e-24
Pdgfra	1.49164e-28	1.68803	0.116	0.048	2.98104e-24
Ctcflos	0.0935136	-0.823204	0.007	0.012	1
Klhl11	0.00562103	-0.820503	0.015	0.026	1
9430037G07Rik	0.0141246	-0.818503	0.011	0.019	1
Tcf15	1.53489e-28	6.07391	0.017	0	3.06748e-24
Krt1	1.96007e-28	4.37857	0.019	0.001	3.91719e-24
Focad	0.00937845	-0.815944	0.024	0.036	1
Cpxm1	2.22948e-28	2.54003	0.062	0.017	4.45561e-24
Ctsk	2.82199e-28	1.27666	0.17	0.085	5.63975e-24
Slc38a7	4.68022e-06	-0.812595	0.034	0.062	0.0935342
Rhpn2	0.000981532	-0.810921	0.012	0.025	1
Igsf10	3.9583e-28	3.03162	0.027	0.003	7.91066e-24
Nat10	4.63998e-05	-0.808709	0.046	0.072	0.9273
Gng7	0.0122967	-0.808276	0.01	0.018	1
Mtss1l	4.14399e-28	0.762345	0.331	0.215	8.28176e-24
Wdr95	0.000122625	-0.806985	0.032	0.054	1
Fbln7	4.37711e-28	1.87552	0.077	0.025	8.74766e-24
Sugct	0.000189223	-0.805353	0.017	0.034	1
Slc25a26	4.18042e-06	-0.80464	0.029	0.056	0.0835456
Myl12b	4.42172e-28	0.550894	0.672	0.586	8.83681e-24
Saxo2	0.000894913	-0.802672	0.015	0.029	1
Nabp1	4.46527e-28	1.82583	0.082	0.028	8.92384e-24
Akap12	6.12296e-28	0.934791	0.261	0.157	1.22367e-23
Tuba1c	6.58431e-28	0.906342	0.437	0.33	1.31587e-23
Scn2a	1.1295e-05	-0.798613	0.048	0.078	0.22573
Fndc1	6.80912e-28	2.74301	0.03	0.004	1.3608e-23
Angptl7	7.10149e-28	2.89961	0.058	0.015	1.41923e-23
Gm45871	0.0216502	-0.796183	0.019	0.028	1
Cox7a2	9.80093e-28	0.266867	0.94	0.908	1.95871e-23
Wnk2	1.29602e-27	5.91328	0.016	0	2.59009e-23
Rgs4	1.36452e-27	1.2638	0.315	0.215	2.72699e-23
Tmc4	0.00945474	-0.792422	0.019	0.031	1
H2al1k	0.0459906	-0.791812	0.005	0.01	1
Cd276	0.00482594	-0.791082	0.017	0.029	1
Twist1	1.61886e-27	0.78493	0.393	0.278	3.23529e-23
Mast4	1.77996e-27	0.518818	0.66	0.573	3.55725e-23
Hist1h4a	2.91571e-27	1.94023	0.058	0.016	5.82705e-23
Ephb3	0.00185849	-0.787964	0.024	0.04	1
Fam185a	0.000205788	-0.786408	0.027	0.047	1
Gramd1c	0.00158424	-0.786097	0.011	0.023	1
Pabpc1	3.27967e-27	0.330509	0.858	0.807	6.55442e-23
Atp5b	4.00451e-27	0.361482	0.858	0.816	8.00302e-23
Adamtsl2	4.89997e-27	2.28901	0.041	0.008	9.79258e-23
Tiparp	5.16656e-27	1.02978	0.237	0.139	1.03254e-22
Comp	8.86798e-27	2.4313	0.102	0.041	1.77227e-22
Rapgef3	9.75031e-27	3.31589	0.026	0.003	1.9486e-22
Sema6d	1.03431e-26	2.90986	0.031	0.004	2.06706e-22
Tubb2a	1.24648e-26	0.784693	0.422	0.309	2.4911e-22
Arl4c	0.000217721	-0.778278	0.019	0.036	1
Ass1	1.50923e-26	1.62542	0.078	0.027	3.0162e-22
Tspan11	1.81537e-26	2.95449	0.028	0.004	3.62802e-22
Hist4h4	1.82607e-26	1.96452	0.061	0.018	3.64941e-22
Rps7	4.22848e-26	0.222765	0.986	0.958	8.45062e-22
Malat1	5.98453e-26	0.182902	0.999	1	1.19601e-21
Gm15952	0.0422322	-0.776326	0.008	0.014	1
Slc9b2	0.00524223	-0.775794	0.018	0.029	1
Lrrc75b	0.0286687	-0.775589	0.01	0.017	1
Myo18b	8.65575e-05	-0.775431	0.036	0.059	1
Aff2	1.95126e-05	-0.774773	0.049	0.078	0.38996
Trim59	6.44718e-26	1.43879	0.081	0.028	1.28847e-21
Piezo2	0.00440318	-0.774628	0.02	0.033	1
Txlnb	0.00250922	-0.774544	0.018	0.031	1
Psat1	0.121645	-0.774359	0.012	0.017	1
E530011L22Rik	0.0125	-0.774358	0.014	0.024	1
Gm45187	0.268248	-0.77263	0.009	0.011	1
Rps16	6.6132e-26	0.216273	0.985	0.967	1.32165e-21
Rerg	6.83284e-26	4.52406	0.02	0.001	1.36554e-21
Slc25a33	6.56313e-05	-0.770406	0.04	0.064	1
Lin7b	0.00661971	-0.769939	0.011	0.02	1
Clec2d	8.16327e-26	1.40549	0.134	0.063	1.63143e-21
Serpinb6a	8.24902e-26	0.374162	0.752	0.691	1.64857e-21
Spred3	0.00902953	-0.768567	0.024	0.036	1
Ttll12	6.90307e-05	-0.768217	0.045	0.07	1
Stk10	8.3603e-05	-0.767814	0.034	0.057	1
Lrrc27	0.00394256	-0.767524	0.014	0.025	1
Acss1	8.39918e-26	1.686	0.063	0.019	1.67858e-21
Ifit3b	0.351468	-0.766683	0.014	0.011	1
Smc4	8.78471e-26	0.888689	0.239	0.141	1.75562e-21
Rasal2	8.90029e-26	0.708733	0.396	0.288	1.77872e-21
Osbpl6	0.000753037	-0.765834	0.024	0.041	1
Sall3	1.06362e-25	3.64089	0.019	0.001	2.12565e-21
Chrnb1	1.11574e-05	-0.763098	0.032	0.059	0.22298
Polr3a	0.00145285	-0.762568	0.036	0.054	1
Chchd10	1.1335e-25	0.982476	0.315	0.212	2.26531e-21
Tcf19	0.000388555	-0.762089	0.026	0.045	1
Itln1	0.00144496	-0.761895	0.019	0.033	1
Ermp1	0.000119209	-0.760977	0.047	0.071	1
Gm17634	1.165e-25	3.39457	0.022	0.002	2.32826e-21
Mmp15	0.0626219	-0.758268	0.009	0.015	1
Trp53bp1	3.54196e-05	-0.757836	0.044	0.07	0.707861
9030624G23Rik	0.10412	-0.757589	0.012	0.017	1
Cyp1b1	1.23774e-25	1.3527	0.13	0.06	2.47363e-21
Gria3	0.0370553	-0.756925	0.019	0.027	1
Sept10	1.25106e-25	0.750297	0.315	0.207	2.50024e-21
Rassf4	1.38836e-05	-0.755794	0.048	0.078	0.277464
Sdc2	1.28211e-25	0.460799	0.666	0.588	2.56229e-21
Tmem35a	0.000572021	-0.755134	0.023	0.04	1
Neto2	1.65645e-25	1.83853	0.069	0.023	3.31042e-21
Epb41l5	0.000152339	-0.754355	0.024	0.043	1
Arhgef16	1.74661e-25	5.38684	0.015	0	3.49059e-21
Gm47689	0.00467625	-0.75413	0.012	0.023	1
Sowahc	1.8815e-25	1.78965	0.073	0.024	3.76017e-21
Smagp	2.016e-25	2.61335	0.04	0.008	4.02898e-21
Flywch2	0.0001445	-0.751293	0.049	0.074	1
Slc2a10	3.17214e-05	-0.750678	0.05	0.078	0.633952
Elmo3	0.193591	-0.747708	0.009	0.013	1
Trim63	0.0223611	-0.747492	0.009	0.016	1
Icosl	2.37562e-25	2.74259	0.023	0.002	4.74768e-21
Ipp	0.0181563	-0.746052	0.023	0.033	1
Casp4	2.66263e-25	1.92659	0.056	0.016	5.32128e-21
Ahsg	2.81533e-25	3.37599	0.024	0.003	5.62645e-21
1700056E22Rik	0.11616	-0.74366	0.009	0.013	1
Ifi207	3.69264e-25	2.55151	0.034	0.006	7.37975e-21
Stk35	1.04147e-05	-0.743418	0.035	0.061	0.208139
Armc3	3.74041e-25	2.85054	0.029	0.004	7.4752e-21
Cacnb4	3.93955e-25	2.96521	0.032	0.005	7.87318e-21
Arl10	0.000412839	-0.742273	0.033	0.053	1
Plk3	3.98539e-25	1.31814	0.095	0.038	7.9648e-21
Gm26825	4.73458e-25	0.386267	0.586	0.452	9.46205e-21
Aox1	0.000103356	-0.74086	0.033	0.055	1
Igfbp6	5.49882e-25	2.27433	0.083	0.031	1.09894e-20
4930522L14Rik	0.0012931	-0.740158	0.02	0.035	1
Txnip	5.81452e-25	0.407914	0.729	0.64	1.16203e-20
Tmem206	0.00844585	-0.739247	0.016	0.027	1
Clmp	6.71401e-05	-0.739159	0.048	0.075	1
Foxl2	6.35127e-25	4.44514	0.019	0.001	1.2693e-20
Napb	0.00366215	-0.735739	0.02	0.033	1
Gstm6	0.140387	-0.734549	0.013	0.018	1
AC162302.1	0.0401844	-0.734338	0.005	0.01	1
Gm11423	0.00786264	-0.733859	0.015	0.025	1
Pdgfc	6.15994e-06	-0.733422	0.057	0.089	0.123106
Mmp16	0.0049014	-0.731398	0.037	0.053	1
Sfxn1	6.54854e-25	0.721875	0.356	0.247	1.30873e-20
Myo7a	6.99838e-25	3.53454	0.019	0.001	1.39863e-20
Cabcoco1	0.0269538	-0.730425	0.008	0.015	1
Arid3b	0.00762772	-0.730251	0.015	0.025	1
Rgs17	7.19438e-25	1.27673	0.11	0.047	1.4378e-20
Jpt2	0.000233905	-0.729217	0.029	0.05	1
Bace2	7.45808e-25	2.17094	0.057	0.016	1.4905e-20
Gdpd3	8.21616e-25	2.98959	0.04	0.008	1.642e-20
Fbf1	0.00232937	-0.727436	0.025	0.04	1
Dpy19l3	0.000879881	-0.727196	0.029	0.047	1
Rpl36	1.08661e-24	0.213435	0.978	0.948	2.1716e-20
Cep85	0.00712697	-0.726155	0.02	0.033	1
Stxbp6	1.25832e-24	1.78539	0.087	0.033	2.51475e-20
Pgpep1l	0.12284	-0.725517	0.011	0.016	1
Sgk1	1.60355e-24	0.497295	0.571	0.47	3.2047e-20
Bok	2.18401e-24	1.58164	0.104	0.044	4.36474e-20
Pfkfb3	0.000129503	-0.723156	0.057	0.084	1
Chst10	0.100815	-0.722832	0.01	0.015	1
Gdpgp1	0.0543063	-0.721401	0.011	0.018	1
Adora1	0.0317466	-0.720779	0.007	0.013	1
Gpr27	0.000145835	-0.720641	0.02	0.039	1
Slbp	2.56824e-24	0.563843	0.445	0.331	5.13262e-20
Efemp1	2.75626e-24	2.09213	0.057	0.017	5.50838e-20
Rpl28	3.31128e-24	0.205468	0.977	0.953	6.6176e-20
Irf5	0.0294311	-0.716031	0.009	0.015	1
Sipa1l3	0.0602535	-0.715046	0.023	0.031	1
Tfap2a	4.31322e-24	1.66145	0.074	0.026	8.61997e-20
Bmper	4.33012e-24	3.25942	0.019	0.002	8.65374e-20
Mmp9	0.0280024	-0.714743	0.009	0.016	1
Pex1	0.00295952	-0.714525	0.02	0.033	1
Phex	6.59032e-24	1.24924	0.088	0.034	1.31708e-19
Spry1	8.84642e-24	0.930342	0.336	0.237	1.76796e-19
2310015D24Rik	0.00414326	-0.713457	0.034	0.05	1
Lipt1	0.00301512	-0.713419	0.016	0.028	1
Fli1	2.93767e-05	-0.712239	0.048	0.075	0.587093
Lrrc56	0.118529	-0.712187	0.016	0.022	1
Bmp4	1.18978e-23	1.5102	0.094	0.038	2.37778e-19
Adrb1	1.2578e-23	1.80628	0.052	0.015	2.51371e-19
Slc36a3os	0.0400304	-0.710037	0.009	0.015	1
Fbln1	1.31957e-23	2.0108	0.263	0.18	2.63717e-19
Slit2	1.42318e-23	1.69187	0.059	0.018	2.84423e-19
Smad9	0.000740153	-0.708023	0.037	0.057	1
Fat3	1.55614e-23	5.88346	0.013	0	3.10994e-19
Camk2g	1.76215e-23	0.529856	0.592	0.518	3.52165e-19
Colec11	1.9474e-23	3.73868	0.033	0.006	3.89187e-19
B4galt6	7.30869e-06	-0.706014	0.067	0.101	0.146064
Ech1	1.96366e-23	0.415161	0.711	0.635	3.92437e-19
Prr5l	0.0127029	-0.703961	0.01	0.018	1
Pcdhgb4	0.0180557	-0.703473	0.005	0.011	1
Fbxo5	0.0980537	-0.702935	0.011	0.017	1
Zfhx2	0.00348181	-0.702678	0.015	0.027	1
Nptxr	2.29377e-05	-0.701777	0.073	0.105	0.45841
Pex5l	2.03388e-23	2.70154	0.029	0.005	4.06471e-19
Cand2	0.0239975	-0.698889	0.02	0.03	1
Wtip	2.07976e-23	0.811953	0.767	0.762	4.1564e-19
Tmem100	2.2538e-23	2.87392	0.032	0.006	4.50422e-19
Tbc1d22b	0.000159594	-0.697816	0.024	0.043	1
Eif4a1	2.27409e-23	0.314722	0.871	0.835	4.54477e-19
Alpk2	0.00760586	-0.697114	0.007	0.015	1
Ralgps1	0.0357166	-0.6966	0.019	0.028	1
Uqcrh	2.38883e-23	0.254189	0.925	0.88	4.77407e-19
Ovca2	0.0996026	-0.696239	0.006	0.01	1
Thada	0.102378	-0.696055	0.02	0.026	1
Fmod	2.47436e-23	2.73917	0.048	0.013	4.94501e-19
Epb41l4b	0.0674835	-0.695482	0.01	0.016	1
Il13ra1	2.60916e-23	1.18568	0.144	0.073	5.21441e-19
Arhgap15	2.81688e-23	4.03011	0.016	0.001	5.62953e-19
Marcks	2.82225e-23	1.16268	0.2	0.117	5.64027e-19
Ifi27l2b	0.14195	-0.693116	0.009	0.013	1
Cfl1	3.89073e-23	0.267421	0.934	0.91	7.77563e-19
Epha4	0.00646185	-0.693038	0.025	0.038	1
Rpl30	4.88538e-23	0.201271	0.991	0.978	9.76343e-19
Fuk	8.67461e-05	-0.690682	0.029	0.051	1
Spin1	4.99048e-23	0.486133	0.592	0.497	9.97347e-19
Cystm1	5.54442e-23	0.580078	0.576	0.495	1.10805e-18
Bmp6	5.88551e-23	3.78969	0.018	0.001	1.17622e-18
Snhg10	0.00743288	-0.688419	0.016	0.027	1
Chpf2	0.000331226	-0.687822	0.074	0.1	1
Serpine1	6.14253e-23	0.460822	0.522	0.413	1.22758e-18
Ccl19	6.31902e-23	2.85401	0.058	0.018	1.26286e-18
Pnpla7	0.0545841	-0.686146	0.009	0.015	1
Abr	7.46933e-23	0.950782	0.214	0.128	1.49275e-18
Fhdc1	7.50229e-23	2.22955	0.043	0.011	1.49933e-18
Stat3	7.516e-23	0.657455	0.367	0.261	1.50207e-18
A530017D24Rik	0.168673	-0.683715	0.011	0.016	1
Usp54	0.00255821	-0.683605	0.043	0.061	1
Slc25a5	9.72366e-23	0.374616	0.82	0.797	1.94327e-18
Esr1	0.00114213	-0.68332	0.028	0.045	1
Mreg	0.0478211	-0.682977	0.01	0.016	1
Gtf2ird1	1.67865e-05	-0.681785	0.065	0.097	0.335478
Lypd1	1.02413e-22	3.52789	0.024	0.003	2.04672e-18
Rps28	1.02832e-22	0.242219	0.97	0.932	2.05511e-18
Kctd12	1.12e-22	1.3712	0.083	0.032	2.23832e-18
Dhcr7	0.0291679	-0.679373	0.023	0.033	1
Spata2l	0.0342801	-0.67902	0.009	0.015	1
Gm49334	0.0945204	-0.678138	0.007	0.012	1
Ikbkg	0.000287331	-0.67806	0.05	0.074	1
Kcnn1	0.0440898	-0.676303	0.01	0.016	1
Smim1	1.20156e-22	1.09912	0.166	0.091	2.40132e-18
Crybb3	1.58361e-22	1.54314	0.067	0.023	3.16485e-18
Atp6ap1l	0.168447	-0.676025	0.015	0.02	1
Enox2	8.3914e-05	-0.673953	0.032	0.054	1
Zfp142	0.00790188	-0.6731	0.029	0.042	1
Sorcs2	2.46406e-22	3.12876	0.022	0.002	4.92442e-18
Tm7sf2	0.0236558	-0.672582	0.022	0.032	1
Pdlim2	2.90014e-22	0.641812	0.51	0.422	5.79593e-18
Mest	3.37446e-22	2.9283	0.024	0.003	6.74386e-18
Xdh	4.08036e-22	2.47893	0.026	0.004	8.15459e-18
Wisp2	4.55269e-22	0.94198	0.33	0.233	9.09854e-18
Zfp960	0.027336	-0.668711	0.019	0.028	1
Vegfd	5.71038e-22	2.61901	0.056	0.017	1.14122e-17
Tenm3	0.0152756	-0.667681	0.034	0.047	1
Ndufb9	6.01764e-22	0.279874	0.875	0.832	1.20262e-17
Lbp	6.25011e-22	2.24048	0.046	0.012	1.24908e-17
Rpl9	7.59632e-22	0.18398	0.988	0.968	1.51812e-17
Ppargc1b	7.80787e-22	1.41718	0.094	0.04	1.5604e-17
Dnm1	7.92868e-22	2.67438	0.026	0.004	1.58455e-17
Cd200	1.01137e-21	0.297443	0.943	0.928	2.02123e-17
Tlcd2	1.35444e-21	1.27937	0.106	0.048	2.70684e-17
Elf4	0.0262506	-0.660922	0.013	0.021	1
Gm43136	0.126553	-0.66025	0.006	0.01	1
Gcnt4	1.52068e-21	3.37253	0.02	0.002	3.03909e-17
Gspt2	0.00536741	-0.658839	0.034	0.049	1
Platr25	0.00212574	-0.658254	0.032	0.049	1
Ptgfr	1.61349e-21	3.06761	0.02	0.002	3.22455e-17
Sag	5.8554e-05	-0.657325	0.048	0.075	1
Ankrd45	0.00100866	-0.657324	0.019	0.034	1
Tmeff2	1.76954e-21	2.81143	0.028	0.005	3.53642e-17
Gm26909	0.00117453	-0.655906	0.031	0.048	1
AW112010	1.7764e-21	3.26497	0.021	0.002	3.55013e-17
Zc3h12a	1.94967e-21	1.38267	0.076	0.029	3.89641e-17
Lgi2	2.30148e-21	2.14275	0.028	0.005	4.59952e-17
Perp	2.56084e-21	0.546273	0.581	0.499	5.11784e-17
Pou3f1	2.56751e-21	0.911689	0.095	0.041	5.13117e-17
Stim1	2.58049e-21	0.660473	0.365	0.266	5.15711e-17
Pak1	2.65558e-21	1.87057	0.06	0.02	5.30718e-17
Zfp185	0.247273	-0.651444	0.007	0.01	1
Bmf	0.00174979	-0.650372	0.015	0.028	1
Iigp1	4.65479e-06	-0.649049	0.024	0.049	0.093026
Ly6a	2.71469e-21	2.83321	0.113	0.055	5.42531e-17
Syt5	2.87573e-21	5.68797	0.012	0	5.74715e-17
Tfpi2	2.91889e-21	4.28735	0.015	0.001	5.83339e-17
AI480526	0.000505769	-0.647393	0.031	0.05	1
Zfp760	0.00846525	-0.647251	0.018	0.029	1
Gm47802	0.029726	-0.647112	0.011	0.018	1
D630003M21Rik	3.11608e-21	3.44257	0.018	0.002	6.22749e-17
Zfp607a	0.0070567	-0.6464	0.018	0.029	1
Gm20655	0.00419528	-0.646041	0.012	0.023	1
Trac	3.52409e-21	5.15647	0.014	0.001	7.04289e-17
Gm26870	0.75176	-0.645433	0.023	0.024	1
Rpl19	3.55308e-21	0.185627	0.981	0.96	7.10083e-17
Cdk15	3.75737e-21	2.05533	0.048	0.014	7.5091e-17
Hps6	0.00155683	-0.644159	0.013	0.026	1
Prss36	0.00435568	-0.644067	0.024	0.038	1
Slc7a2	4.7103e-21	1.10207	0.14	0.073	9.41354e-17
Myl6b	0.0070676	-0.643922	0.028	0.042	1
Sult5a1	5.43439e-21	2.34348	0.025	0.004	1.08606e-16
Tlr2	0.208014	-0.64299	0.014	0.018	1
Vps37c	4.93515e-06	-0.641402	0.067	0.103	0.0986291
Gm3739	0.254539	-0.640528	0.009	0.012	1
Cebpd	5.62488e-21	0.369779	0.652	0.568	1.12413e-16
Ehd1	7.44451e-21	0.623281	0.402	0.306	1.48779e-16
Rps8	8.27848e-21	0.156773	1	0.998	1.65445e-16
Cacna1h	9.01568e-21	3.22908	0.018	0.002	1.80178e-16
Snx33	0.00127352	-0.638306	0.029	0.047	1
Ly6k	9.44513e-21	2.16917	0.045	0.013	1.88761e-16
Col23a1	0.32229	-0.63769	0.009	0.011	1
Pim2	0.0183654	-0.63579	0.012	0.021	1
Col27a1	0.0182027	-0.635542	0.04	0.053	1
Gm36839	9.8214e-21	1.25578	0.07	0.026	1.96281e-16
Cox4i2	1.09373e-20	0.988219	0.307	0.217	2.18581e-16
Man1c1	1.53464e-20	1.87128	0.054	0.017	3.06697e-16
Pir	1.5698e-20	1.45713	0.086	0.036	3.13725e-16
Hist1h1a	1.57237e-20	2.5878	0.033	0.007	3.14238e-16
Sox5	1.70051e-20	1.11814	0.109	0.051	3.39846e-16
Slc25a4	2.03628e-20	0.194644	0.98	0.979	4.06951e-16
Unc5b	2.05402e-20	1.08496	0.121	0.059	4.10496e-16
Ly6e	2.30515e-20	1.47342	0.052	0.016	4.60684e-16
Gm28523	0.122318	-0.632972	0.012	0.018	1
Dhx58os	2.89197e-20	2.01261	0.043	0.012	5.77959e-16
Dock11	1.26551e-05	-0.630598	0.044	0.073	0.252912
Rai14	2.99511e-20	1.91749	0.04	0.01	5.98573e-16
Flnb	8.7151e-06	-0.629182	0.081	0.117	0.174171
AC124739.1	0.117964	-0.627894	0.009	0.013	1
Ndc1	0.00211893	-0.627758	0.029	0.045	1
Cntrob	0.0178432	-0.627577	0.011	0.02	1
Eif2ak1	0.000256466	-0.626581	0.046	0.07	1
Ncs1	4.45273e-20	0.556827	0.439	0.341	8.89879e-16
Milr1	4.55576e-20	1.17879	0.061	0.021	9.10468e-16
Zgpat	4.58555e-05	-0.626018	0.086	0.118	0.916423
Fap	4.93548e-20	1.6575	0.054	0.018	9.86355e-16
St3gal6	5.71614e-20	0.930766	0.167	0.094	1.14237e-15
Ddit3	5.92388e-20	0.82696	0.287	0.199	1.18389e-15
Angpt1	7.13531e-20	2.27347	0.027	0.005	1.42599e-15
Rps9	7.8561e-20	0.216241	0.957	0.906	1.57004e-15
Arhgap6	8.02485e-20	0.852214	0.238	0.153	1.60377e-15
Gm42067	0.0450531	-0.623408	0.018	0.026	1
Il1r1	1.34331e-19	0.751669	0.271	0.184	2.6846e-15
Nt5dc3	0.0376755	-0.622045	0.028	0.038	1
Gm14005	1.4007e-19	2.55581	0.026	0.005	2.79929e-15
Aspa	1.95378e-19	2.16182	0.027	0.005	3.90464e-15
Zfp174	0.0485419	-0.620805	0.006	0.011	1
Thnsl2	2.17129e-05	-0.619809	0.07	0.103	0.433932
Gm26523	2.19605e-19	1.41206	0.081	0.034	4.38881e-15
Nudt7	0.000667354	-0.618326	0.028	0.046	1
A530046M15Rik	0.0887879	-0.618242	0.007	0.012	1
Kpna2	0.00591066	-0.617423	0.024	0.037	1
Slc25a35	3.0397e-06	-0.616849	0.059	0.094	0.0607483
Fbxo24	0.022953	-0.616829	0.016	0.026	1
Vit	2.22921e-19	1.41301	0.07	0.027	4.45508e-15
Atrn	0.00258136	-0.615915	0.053	0.072	1
Lrig3	1.25143e-05	-0.614842	0.062	0.094	0.250098
Fam20a	2.85001e-19	0.877212	0.149	0.081	5.69574e-15
Crip2	3.07266e-19	0.200112	0.97	0.965	6.14071e-15
Zfp827	0.000971209	-0.613849	0.042	0.062	1
Foxd1	3.29967e-19	3.59362	0.018	0.002	6.59439e-15
Stard13	1.72436e-05	-0.611945	0.065	0.097	0.344614
Pi16	3.40425e-19	2.14637	0.168	0.101	6.80339e-15
Mettl27	0.000128009	-0.611382	0.033	0.056	1
Camkk1	0.0204913	-0.61127	0.027	0.038	1
Tvp23bos	0.0384597	-0.610106	0.018	0.026	1
Dnajc17	3.59299e-05	-0.609888	0.058	0.088	0.71806
Syn1	0.0125737	-0.609387	0.01	0.018	1
Anpep	3.46199e-19	1.68986	0.058	0.021	6.91879e-15
C1qtnf1	6.16857e-19	1.36125	0.081	0.034	1.23279e-14
Grk3	0.000706969	-0.608092	0.037	0.057	1
Acaca	2.3438e-05	-0.60791	0.057	0.087	0.468408
Alkbh1	7.48427e-05	-0.607743	0.065	0.095	1
Rps13	6.45264e-19	0.204313	0.96	0.932	1.28956e-14
Zcchc2	0.00292659	-0.607188	0.035	0.051	1
Mvd	0.00900564	-0.606862	0.018	0.029	1
Cntrl	5.28366e-05	-0.6065	0.062	0.092	1
Hps1	0.0242183	-0.606312	0.034	0.046	1
Ndufa5	6.45888e-19	0.30815	0.814	0.772	1.29081e-14
Zfyve1	0.00138442	-0.605973	0.042	0.062	1
Fam110a	6.90987e-19	1.60584	0.074	0.03	1.38094e-14
Dynlt1a	4.89486e-05	-0.605327	0.075	0.107	0.978238
Srgap3	0.00855668	-0.605084	0.028	0.041	1
Zfyve28	0.209708	-0.605017	0.012	0.016	1
Alg2	6.98309e-05	-0.604376	0.06	0.088	1
Arid5a	7.19057e-19	0.746209	0.3	0.214	1.43704e-14
Zfp239	0.0129281	-0.60369	0.012	0.022	1
Rpl22	7.19527e-19	0.208929	0.956	0.923	1.43797e-14
6030443J06Rik	0.0609957	-0.602937	0.008	0.013	1
Fam46b	1.08507e-05	-0.602897	0.083	0.12	0.216851
Dmxl2	0.00234502	-0.602683	0.028	0.044	1
Zfp169	0.10111	-0.602357	0.006	0.01	1
Prkci	8.66751e-05	-0.601917	0.111	0.145	1
Kif5b	8.2572e-19	0.22368	0.918	0.902	1.6502e-14
Serinc5	0.00275538	-0.601388	0.057	0.077	1
Rpl17	9.07673e-19	0.22668	0.933	0.879	1.81398e-14
Paqr7	2.4208e-05	-0.601332	0.071	0.104	0.483798
Cpeb3	1.00425e-05	-0.600728	0.052	0.083	0.200699
Xrcc2	0.020479	-0.600149	0.007	0.014	1
Zdhhc23	0.0629156	-0.599183	0.02	0.028	1
Plekha6	9.11924e-19	2.26535	0.023	0.004	1.82248e-14
Sec16b	9.14229e-19	2.75635	0.021	0.003	1.82709e-14
Gnpda1	0.000132822	-0.598391	0.05	0.075	1
6030458C11Rik	9.39891e-05	-0.598372	0.055	0.082	1
Inpp4b	9.20637e-19	4.46983	0.015	0.001	1.83989e-14
Rps4x	9.4545e-19	0.187469	0.99	0.973	1.88948e-14
Rcbtb1	5.04707e-06	-0.597461	0.075	0.111	0.100866
Rnase4	9.61416e-19	1.23775	0.242	0.169	1.92139e-14
Pcdh18	9.98857e-19	1.54556	0.062	0.023	1.99622e-14
Xlr3b	0.110387	-0.59611	0.017	0.023	1
Cage1	0.067636	-0.595773	0.02	0.028	1
Fancg	0.0914174	-0.594863	0.014	0.02	1
Thrsp	1.09402e-18	0.914917	0.222	0.144	2.1864e-14
Zfp521	1.09933e-18	2.60136	0.023	0.004	2.197e-14
Pla2g15	4.24728e-05	-0.592525	0.064	0.094	0.848819
Scrn2	0.00187549	-0.5922	0.042	0.061	1
Prelid2	2.85932e-05	-0.591752	0.053	0.082	0.571435
Lhfpl2	1.19063e-18	2.84503	0.02	0.003	2.37947e-14
Fam84b	1.26139e-18	1.93056	0.037	0.01	2.52089e-14
Usp13	0.0108818	-0.591243	0.043	0.058	1
Tmie	1.62634e-18	2.12808	0.043	0.013	3.25024e-14
Nphp3	0.00429801	-0.590567	0.037	0.053	1
C3	1.66522e-18	2.46428	0.087	0.04	3.32794e-14
Mgat5	0.001585	-0.589819	0.052	0.073	1
Tagln	1.94764e-18	0.13146	1	1	3.89235e-14
Bicdl1	0.000180343	-0.589293	0.037	0.06	1
Glipr2	2.2435e-18	0.864215	0.223	0.146	4.48363e-14
Rpl35	2.34659e-18	0.221107	0.935	0.877	4.68966e-14
2900026A02Rik	2.63583e-18	0.575564	0.378	0.287	5.26772e-14
4732491K20Rik	0.00877521	-0.588244	0.023	0.036	1
Abca7	0.510325	-0.587851	0.017	0.019	1
Mrm1	0.0220637	-0.587735	0.021	0.031	1
Relt	2.65841e-18	2.60603	0.021	0.003	5.31284e-14
Rap2c	0.000236441	-0.587464	0.065	0.092	1
Hemk1	0.0415466	-0.586625	0.018	0.026	1
Adamts9	0.000587384	-0.586288	0.04	0.06	1
Sh3pxd2b	9.83054e-05	-0.585994	0.086	0.117	1
Ctxn1	2.70765e-18	0.884022	0.229	0.151	5.41124e-14
Map3k4	8.23501e-06	-0.585919	0.082	0.118	0.164577
Cfb	2.76192e-18	2.84228	0.018	0.002	5.51969e-14
Adap1	2.7761e-18	1.45824	0.071	0.029	5.54803e-14
Chrnb3	0.0665685	-0.584649	0.007	0.013	1
Pdcd4	2.95976e-18	0.579836	0.431	0.341	5.91508e-14
Gdf11	3.20061e-18	2.08207	0.044	0.013	6.39643e-14
Fabp5	3.22132e-18	1.09813	0.261	0.182	6.43782e-14
Hcfc1	3.76791e-06	-0.583681	0.133	0.176	0.0753016
Styx	0.0465086	-0.583525	0.024	0.033	1
1500011B03Rik	0.000253854	-0.583195	0.044	0.068	1
Colgalt2	3.34268e-18	3.18947	0.015	0.001	6.68035e-14
Blm	0.180289	-0.582988	0.007	0.011	1
Gen1	0.0899058	-0.582983	0.008	0.013	1
Hyal2	0.00194021	-0.582924	0.048	0.068	1
Atp5e	3.67356e-18	0.209953	0.941	0.877	7.34161e-14
Papss2	0.0372821	-0.582798	0.049	0.062	1
Ddo	0.117867	-0.582194	0.014	0.019	1
Ydjc	0.108456	-0.58192	0.006	0.01	1
9130221H12Rik	0.209454	-0.581844	0.012	0.016	1
Arhgef7	3.84462e-18	0.879428	0.261	0.18	7.68348e-14
Zfp7	0.121214	-0.581303	0.015	0.02	1
Cdk14	4.17996e-18	1.4532	0.059	0.022	8.35366e-14
Ankrd52	0.0274346	-0.580483	0.018	0.027	1
Tsacc	0.006768	-0.58018	0.022	0.035	1
Prkdc	0.0222992	-0.580032	0.024	0.035	1
Pomgnt2	2.20124e-05	-0.57886	0.07	0.103	0.439918
Ccne2	0.291629	-0.578743	0.01	0.013	1
Mndal	5.09643e-18	2.2889	0.026	0.005	1.01852e-13
Cox6b1	5.11321e-18	0.250839	0.884	0.838	1.02188e-13
Cdsn	0.0775421	-0.578087	0.011	0.017	1
Zfp446	0.0459213	-0.577612	0.019	0.027	1
Uba52	5.50652e-18	0.27524	0.89	0.833	1.10048e-13
Pbx3	8.82239e-18	0.840085	0.19	0.117	1.76315e-13
Atp5g2	9.00741e-18	0.239111	0.902	0.853	1.80013e-13
Tek	9.02956e-18	3.30664	0.016	0.002	1.80456e-13
Vegfa	1.02554e-17	1.11386	0.119	0.061	2.04955e-13
Zfyve26	0.00204356	-0.575873	0.026	0.041	1
Map7	0.00288826	-0.575663	0.026	0.041	1
Tet1	0.000307285	-0.575396	0.049	0.073	1
Rps27	1.05703e-17	0.24156	0.954	0.909	2.11248e-13
Smad7	1.11208e-17	0.327634	0.543	0.435	2.22249e-13
Ttf2	0.0194631	-0.573099	0.015	0.024	1
Sik1	1.12217e-17	1.5425	0.064	0.025	2.24266e-13
Slc41a2	0.0015496	-0.572744	0.028	0.044	1
Reep1	1.20165e-17	0.98771	0.157	0.092	2.4015e-13
Gm26797	0.203114	-0.572101	0.008	0.011	1
Sobp	3.71461e-06	-0.572056	0.092	0.132	0.0742365
Zfp738	0.000421666	-0.57186	0.04	0.061	1
Spata13	0.0011672	-0.571776	0.046	0.067	1
Gm6712	0.0955366	-0.570827	0.007	0.011	1
Pemt	0.102717	-0.570201	0.009	0.013	1
Rpl21	1.23163e-17	0.15092	0.991	0.987	2.46141e-13
Marcksl1	1.24248e-17	1.21734	0.081	0.036	2.48309e-13
Coil	0.0837086	-0.568823	0.023	0.03	1
Pars2	0.0206003	-0.568467	0.014	0.023	1
Mfsd3	0.00663861	-0.568308	0.029	0.044	1
Epha1	0.000169229	-0.568193	0.048	0.073	1
Ezr	1.28642e-17	1.20346	0.099	0.048	2.57092e-13
Orai2	0.101977	-0.567857	0.01	0.015	1
Trim36	1.31608e-17	1.25375	0.075	0.032	2.63019e-13
Zfp790	0.0815429	-0.567331	0.016	0.022	1
Dok4	0.00114353	-0.566756	0.038	0.057	1
Grpel2	0.000900562	-0.566482	0.046	0.067	1
Mlh1	0.022375	-0.565189	0.014	0.023	1
Ar	1.37939e-17	0.753473	0.174	0.103	2.7567e-13
Hus1	0.00234988	-0.564129	0.037	0.055	1
Serhl	0.000292122	-0.563756	0.068	0.095	1
Glb1l	0.0759995	-0.563632	0.032	0.041	1
Ctnnal1	3.22637e-06	-0.563065	0.118	0.16	0.0644789
Matn2	1.4506e-17	0.824421	0.229	0.152	2.89901e-13
Pcbp3	3.00704e-05	-0.562249	0.041	0.069	0.600957
Pcsk4	0.109646	-0.561442	0.006	0.01	1
Ndrg4	0.000397528	-0.561334	0.061	0.086	1
Dlx5	0.377852	-0.56055	0.02	0.023	1
Sugp2	0.000220937	-0.560107	0.041	0.065	1
Ntrk2	1.54029e-17	1.12711	0.092	0.043	3.07827e-13
Nfrkb	3.05355e-05	-0.559495	0.071	0.105	0.610251
Afap1	1.55258e-17	0.463333	0.48	0.385	3.10284e-13
Plekhg2	1.60227e-17	0.75622	0.217	0.139	3.20214e-13
AC164424.1	0.0544404	-0.558736	0.009	0.014	1
Klhl3	0.0262058	-0.558665	0.011	0.019	1
Agrn	1.7735e-05	-0.557921	0.123	0.162	0.354433
Cys1	1.75025e-17	0.718258	0.289	0.206	3.49787e-13
D130017N08Rik	0.132546	-0.557428	0.012	0.017	1
Zfp870	0.101941	-0.557418	0.022	0.028	1
Rfx5	0.00642956	-0.557417	0.027	0.041	1
Yars2	0.00627204	-0.557086	0.054	0.072	1
Greb1l	0.0102454	-0.556979	0.015	0.025	1
Dgke	0.0178284	-0.556369	0.038	0.051	1
Gm16486	2.0309e-17	2.79767	0.018	0.002	4.05875e-13
Fetub	2.06624e-17	2.16816	0.032	0.008	4.12939e-13
Herc3	0.000956955	-0.556243	0.065	0.088	1
Poll	0.0176547	-0.556237	0.023	0.034	1
Pla2g6	0.0397921	-0.556001	0.026	0.035	1
1110008L16Rik	0.0511692	-0.555995	0.014	0.021	1
Ppfibp2	2.64817e-17	0.916806	0.133	0.073	5.29238e-13
Prep	0.00225583	-0.554625	0.057	0.077	1
Garem1	0.00414688	-0.554567	0.026	0.04	1
Spg11	0.056569	-0.554505	0.026	0.035	1
Fuca2	0.000236298	-0.5541	0.054	0.08	1
Ccdc28a	0.000353335	-0.55394	0.045	0.069	1
Naca	2.83518e-17	0.183926	0.974	0.941	5.66612e-13
Tpm2	2.88823e-17	0.384069	0.978	0.984	5.77213e-13
Fem1c	2.67871e-05	-0.55333	0.08	0.114	0.53534
Lsm11	0.0069913	-0.553288	0.033	0.048	1
Cck	0.0150989	-0.553267	0.01	0.018	1
Camk1d	2.89556e-17	1.4818	0.055	0.02	5.78678e-13
9130019O22Rik	0.196537	-0.552942	0.011	0.015	1
Slc23a2	0.00108825	-0.55248	0.045	0.066	1
Stmn4	0.10062	-0.552447	0.011	0.016	1
Rnf122	3.24093e-17	1.46849	0.054	0.02	6.47699e-13
Cox5b	3.30703e-17	0.244938	0.865	0.844	6.6091e-13
Zfp973	0.0942285	-0.552002	0.017	0.023	1
Dcp1b	0.00164965	-0.551802	0.045	0.065	1
Tmem51os1	4.02541e-17	1.45152	0.06	0.023	8.04478e-13
Plxna4	1.7734e-05	-0.551772	0.093	0.129	0.354413
Pnmal2	0.151405	-0.551699	0.009	0.013	1
Pip4k2a	4.21002e-17	0.774863	0.206	0.131	8.41372e-13
Trmt44	0.0108591	-0.551097	0.037	0.052	1
Zfp423	0.00767872	-0.551024	0.037	0.052	1
Gin1	0.00135145	-0.550935	0.051	0.072	1
Gm47101	0.00174892	-0.550772	0.023	0.038	1
Mdn1	0.00981276	-0.550585	0.034	0.048	1
Inca1	0.11895	-0.550404	0.008	0.012	1
Il34	4.85617e-17	5.40591	0.011	0	9.70505e-13
Rnf144a	6.17859e-17	1.90653	0.035	0.009	1.23479e-12
Dph2	0.230511	-0.549968	0.016	0.021	1
Mylk2	0.0387857	-0.549494	0.011	0.018	1
Zfp235	0.034141	-0.54949	0.025	0.035	1
Sbk1	0.0241496	-0.548815	0.011	0.018	1
Rpl8	6.31594e-17	0.169279	0.985	0.972	1.26224e-12
Cep131	0.223218	-0.547786	0.028	0.034	1
Fam20b	0.00022322	-0.547017	0.08	0.109	1
Cyth3	6.45623e-17	0.422066	0.553	0.473	1.29028e-12
Cfp	0.212644	-0.546545	0.01	0.014	1
Ttc30b	0.00167043	-0.546342	0.054	0.075	1
Tmem104	0.00242289	-0.545936	0.022	0.037	1
Dusp5	7.39408e-17	1.04032	0.12	0.064	1.47771e-12
BC024978	0.0115549	-0.545075	0.032	0.045	1
Ifrd1	8.65477e-17	0.463844	0.743	0.696	1.72966e-12
Adgra2	8.79283e-17	1.28676	0.064	0.026	1.75725e-12
Plscr4	9.9771e-17	0.895417	0.168	0.101	1.99392e-12
AU020206	0.0172648	-0.54351	0.019	0.029	1
Arl5c	0.00937795	-0.543452	0.023	0.035	1
Cacnb1	7.0109e-05	-0.543323	0.036	0.06	1
Rasgrp2	1.01522e-16	0.482613	0.493	0.415	2.02892e-12
Ago4	0.0485915	-0.54328	0.035	0.046	1
Cyp26b1	0.0260691	-0.543195	0.006	0.012	1
Kcns3	9.0567e-05	-0.542801	0.043	0.068	1
Dus2	9.88501e-05	-0.54245	0.06	0.088	1
1700025G04Rik	1.05999e-16	1.01432	0.105	0.053	2.1184e-12
Fmo1	1.15967e-16	0.986496	0.141	0.08	2.3176e-12
Zdhhc12	6.68848e-05	-0.541035	0.048	0.074	1
Prr7	0.110269	-0.540658	0.012	0.017	1
Lcor	0.010211	-0.540514	0.054	0.07	1
Zkscan14	0.0202481	-0.539423	0.022	0.032	1
Zzef1	0.000220145	-0.539187	0.066	0.093	1
Mov10	0.461591	-0.539164	0.009	0.011	1
Hnrnpl	1.16856e-16	0.282353	0.84	0.79	2.33537e-12
Il6	1.1946e-16	2.81007	0.025	0.005	2.3874e-12
Gm20721	0.316753	-0.538855	0.011	0.014	1
Slc6a4	1.28269e-16	3.30329	0.015	0.002	2.56345e-12
Fam184b	0.00787395	-0.538068	0.012	0.022	1
Gm15737	0.294307	-0.537035	0.008	0.011	1
Mrc2	3.47544e-06	-0.536368	0.089	0.129	0.0694567
H2-Q4	1.48987e-16	1.12518	0.065	0.026	2.97751e-12
Nptx2	1.79028e-16	0.798359	0.156	0.091	3.57786e-12
Ipo13	0.0185735	-0.533815	0.047	0.061	1
Rps27a	2.43968e-16	0.158636	0.993	0.983	4.8757e-12
Gcfc2	0.0159435	-0.533339	0.031	0.043	1
Gpr157	0.251333	-0.533277	0.007	0.01	1
Ctnna3	2.55989e-16	0.619078	0.303	0.22	5.11595e-12
Sh3glb1	2.6287e-16	0.291477	0.752	0.694	5.25345e-12
Itga2b	2.70918e-16	1.55995	0.052	0.019	5.4143e-12
Chd3os	0.155454	-0.532495	0.009	0.013	1
Adamts5	3.05812e-16	0.859993	0.277	0.199	6.11166e-12
Chst15	3.37127e-16	2.91768	0.018	0.003	6.73748e-12
Penk	3.65335e-16	1.32627	0.049	0.017	7.30123e-12
Tmem196	4.33314e-16	2.9626	0.022	0.004	8.65977e-12
Rnaseh2b	0.000108582	-0.531229	0.071	0.101	1
Klf12	0.0538897	-0.530832	0.024	0.033	1
Ank3	4.96244e-16	1.8326	0.04	0.013	9.91743e-12
Pigg	0.0179473	-0.530532	0.036	0.049	1
Vps25	2.699e-05	-0.530373	0.046	0.074	0.539395
Celf1	5.18601e-16	0.508681	0.364	0.278	1.03642e-11
Col13a1	5.30941e-16	4.2861	0.01	0	1.06109e-11
Slc25a29	2.68208e-05	-0.52975	0.05	0.08	0.536014
Zfp287	0.0396315	-0.52968	0.019	0.027	1
Cep192	0.00212969	-0.529369	0.036	0.053	1
Ccdc17	0.137207	-0.529367	0.007	0.011	1
Fchsd1	0.0876624	-0.5277	0.021	0.028	1
Ercc8	0.00533402	-0.527444	0.043	0.059	1
Myl1	5.58845e-16	2.65883	0.024	0.005	1.11685e-11
Bcorl1	0.00160129	-0.526463	0.053	0.074	1
Plekha7	0.0262171	-0.526307	0.019	0.028	1
Ptges3	5.83971e-16	0.211598	0.933	0.914	1.16707e-11
Glul	5.85593e-16	0.598148	0.427	0.342	1.17031e-11
Zfp955b	0.00370498	-0.525753	0.022	0.035	1
Mtcl1	0.444659	-0.525737	0.008	0.01	1
Wdr37	0.000154504	-0.525574	0.093	0.124	1
Rps29	6.30579e-16	0.200732	0.981	0.961	1.26021e-11
Dcaf17	0.00159529	-0.525101	0.055	0.076	1
Dbi	6.38861e-16	0.28379	0.9	0.877	1.27676e-11
Epyc	7.62718e-16	3.29905	0.02	0.003	1.52429e-11
Shisa3	7.63316e-16	2.6218	0.018	0.003	1.52549e-11
Zfp3	0.229391	-0.524708	0.015	0.02	1
Fzd4	8.99877e-16	1.11504	0.141	0.082	1.7984e-11
Frat1	0.00932116	-0.5242	0.01	0.018	1
Stat5a	0.000132672	-0.524076	0.058	0.085	1
Zfp146	0.0139028	-0.52402	0.035	0.049	1
Zbtb7b	0.00147745	-0.523594	0.06	0.082	1
Prdm5	0.00155966	-0.522906	0.078	0.102	1
Katnb1	0.0263546	-0.522901	0.043	0.055	1
Slc11a2	0.000393773	-0.522876	0.063	0.089	1
Zfp78	0.208623	-0.522662	0.011	0.015	1
Mlst8	0.0461882	-0.522588	0.019	0.028	1
Mob2	9.55837e-16	0.428807	0.643	0.589	1.91024e-11
Olfml2a	9.87562e-16	1.22631	0.077	0.035	1.97364e-11
Slc16a9	0.00100886	-0.520889	0.036	0.055	1
Rtbdn	1.02794e-15	2.4776	0.016	0.002	2.05434e-11
Map4k4	1.23026e-15	0.473407	0.449	0.367	2.45868e-11
Lyrm1	0.000953832	-0.520357	0.059	0.082	1
Alkbh4	0.074845	-0.520175	0.012	0.019	1
Mospd2	2.35627e-05	-0.51982	0.082	0.117	0.470901
Timp1	1.23833e-15	1.17335	0.139	0.081	2.47479e-11
Pnpo	0.00422426	-0.519414	0.052	0.07	1
1110034G24Rik	8.19493e-05	-0.518964	0.073	0.104	1
Lrch3	2.59908e-06	-0.518441	0.124	0.168	0.0519427
Hilpda	0.000224059	-0.518257	0.065	0.092	1
Fbln2	1.35063e-15	1.88725	0.098	0.051	2.69924e-11
Abca9	1.35772e-15	2.06542	0.028	0.007	2.7134e-11
Grtp1	0.00651531	-0.517665	0.058	0.076	1
Dusp10	4.1327e-05	-0.516956	0.075	0.108	0.82592
Sphk2	1.55556e-05	-0.516868	0.108	0.147	0.310879
Ankrd37	1.37774e-15	1.15835	0.099	0.05	2.75341e-11
Pecr	0.000330317	-0.516465	0.071	0.099	1
Hps3	0.00328161	-0.516418	0.053	0.072	1
Apba1	0.157241	-0.515559	0.033	0.04	1
5430403G16Rik	0.00132842	-0.515297	0.044	0.064	1
Cep170b	9.26751e-06	-0.515225	0.102	0.142	0.185211
Pnpla6	0.0217698	-0.51469	0.032	0.044	1
Rpl34	1.38591e-15	0.164963	0.986	0.964	2.76974e-11
Ifi27	1.44649e-15	0.259259	0.801	0.767	2.89081e-11
Ptdss1	0.000130492	-0.51337	0.078	0.108	1
Pms2	0.040454	-0.513237	0.033	0.043	1
Kdm4b	0.0195632	-0.513175	0.05	0.065	1
Negr1	0.113556	-0.512705	0.015	0.01	1
Coq10b	1.48384e-15	0.43712	0.492	0.406	2.96545e-11
Llgl2	1.62685e-15	1.59078	0.05	0.018	3.25127e-11
Adcy3	1.16147e-05	-0.511475	0.069	0.103	0.232119
Trim13	0.0167277	-0.511354	0.016	0.026	1
Mbd5	0.000101502	-0.51134	0.077	0.108	1
1010001N08Rik	0.000419161	-0.510819	0.044	0.066	1
Prcd	1.81177e-15	3.65918	0.014	0.001	3.62082e-11
Slc1a3	1.90166e-15	3.10838	0.014	0.001	3.80047e-11
Atp5o.1	1.9218e-15	0.326158	0.698	0.632	3.84073e-11
Pcbp2	1.92499e-15	0.296016	0.761	0.713	3.8471e-11
4921504A21Rik	0.0280932	-0.509808	0.023	0.033	1
Edem3	0.000340394	-0.509807	0.061	0.087	1
Fastkd1	0.0114553	-0.509651	0.032	0.046	1
Ada	1.94349e-15	0.995573	0.116	0.063	3.88406e-11
Jph1	0.00252326	-0.509064	0.036	0.054	1
Cebpb	2.09944e-15	0.279122	0.904	0.897	4.19573e-11
Ccdc39	0.108895	-0.508618	0.018	0.024	1
Ctf1	0.000348595	-0.508403	0.056	0.08	1
Mybl1	1.62704e-05	-0.507882	0.094	0.131	0.325164
Myzap	2.2121e-15	1.43526	0.061	0.025	4.42089e-11
Cd36	2.21706e-15	3.47167	0.024	0.005	4.4308e-11
Cep57l1	0.00319229	-0.5075	0.041	0.059	1
Fah	6.164e-05	-0.507187	0.076	0.107	1
Fam213a	2.85225e-06	-0.506741	0.074	0.113	0.0570022
Dynlrb1	2.30498e-15	0.286343	0.788	0.738	4.60651e-11
Tslp	2.305e-15	2.36859	0.018	0.003	4.60654e-11
Gm47237	2.34425e-15	1.78357	0.026	0.006	4.68497e-11
AI606181	0.190881	-0.505699	0.013	0.017	1
Smg9	0.000777055	-0.50502	0.04	0.06	1
Znrf3	4.14587e-06	-0.504999	0.088	0.128	0.0828553
Ly6c1	2.47619e-15	2.42388	0.06	0.025	4.94866e-11
Coa4	0.0179237	-0.504353	0.043	0.056	1
Lmo2	2.48622e-15	2.26796	0.02	0.004	4.96872e-11
Armcx6	0.204118	-0.50401	0.018	0.023	1
Tmem69	0.0264555	-0.503968	0.02	0.03	1
Carf	0.00152391	-0.5036	0.065	0.088	1
Gm12359	0.247787	-0.503528	0.012	0.016	1
Vps13d	0.00188934	-0.503493	0.094	0.119	1
Itga6	0.0448779	-0.503147	0.006	0.011	1
Pgam5	0.000224785	-0.503038	0.078	0.107	1
Sprtn	0.00803677	-0.50274	0.03	0.044	1
Pcyt2	0.000302415	-0.502325	0.101	0.131	1
Gm6169	0.0592155	-0.502231	0.024	0.033	1
Hhip	2.83034e-15	2.71928	0.022	0.004	5.65643e-11
B3gnt5	4.7383e-05	-0.501799	0.087	0.122	0.94695
Fam129a	3.01552e-15	0.354844	0.798	0.78	6.02651e-11
Lyplal1	6.09755e-06	-0.501455	0.087	0.126	0.121859
Xrcc6	2.96077e-05	-0.501118	0.085	0.12	0.59171
9230111E07Rik	0.140226	-0.50098	0.014	0.019	1
Ankzf1	0.00359647	-0.50096	0.059	0.079	1
Adrb2	3.18461e-15	1.48325	0.037	0.011	6.36444e-11
Lrrc51	0.0297228	-0.500827	0.02	0.03	1
Angpt4	3.20563e-15	1.71125	0.032	0.009	6.40646e-11
Nxpe4	0.185985	-0.500414	0.011	0.015	1
Myc	3.51014e-15	0.939533	0.087	0.042	7.01501e-11
Arhgap1	3.86279e-15	0.651082	0.275	0.197	7.71978e-11
Rpusd3	0.0644058	-0.500056	0.019	0.027	1
Rnd2	4.01593e-15	0.631868	0.289	0.211	8.02583e-11
Tbc1d32	0.118966	-0.499212	0.024	0.031	1
Angptl6	0.00780151	-0.498513	0.036	0.05	1
Polr2a	4.02821e-15	0.759467	0.23	0.159	8.05037e-11
Vav3	0.0145315	-0.498415	0.045	0.059	1
Chic1	0.0012563	-0.498109	0.062	0.085	1
Asap3	0.0356957	-0.497505	0.02	0.029	1
Ftl1-ps1	4.24303e-15	1.10995	0.08	0.038	8.4797e-11
Smim11	4.47859e-15	0.368495	0.627	0.565	8.95047e-11
Mocs3	0.0176953	-0.49622	0.034	0.047	1
Slc35c1	0.0440593	-0.496125	0.015	0.022	1
Ifi211	4.59117e-15	3.2118	0.017	0.003	9.17546e-11
Mmp27	4.91404e-15	3.46225	0.01	0.001	9.82071e-11
Zfand2a	0.00207829	-0.495416	0.049	0.069	1
A930004D18Rik	0.0977937	-0.4953	0.019	0.026	1
Usf3	0.000704809	-0.495289	0.085	0.112	1
8430408G22Rik	0.59572	-0.495175	0.011	0.013	1
Layn	0.00383994	-0.495077	0.059	0.079	1
Rap1gds1	2.8154e-05	-0.49498	0.104	0.14	0.562657
Lrrc4b	0.304208	-0.494927	0.015	0.018	1
Nudt11	0.000567966	-0.494795	0.03	0.049	1
Gzf1	0.00246698	-0.494699	0.064	0.085	1
Erg	0.0621764	-0.49441	0.019	0.026	1
Ifit2	0.00263253	-0.494216	0.044	0.063	1
Klhl29	4.94296e-15	2.03758	0.035	0.011	9.87851e-11
Enpp2	4.99031e-15	0.646971	0.14	0.081	9.97314e-11
Tab3	0.0221095	-0.493229	0.013	0.021	1
Hmcn1	5.61077e-15	4.71252	0.01	0	1.12131e-10
Ccdc163	4.34522e-06	-0.493113	0.08	0.119	0.0868392
5033417F24Rik	0.118466	-0.492927	0.008	0.012	1
Stmn1	6.57582e-15	1.08456	0.079	0.037	1.31418e-10
Dennd1a	2.50196e-05	-0.492642	0.091	0.127	0.500016
Cpt1c	0.0133376	-0.492607	0.051	0.067	1
Sbno2	6.64456e-15	0.416181	0.265	0.184	1.32792e-10
Nyap1	0.0771402	-0.492142	0.02	0.027	1
Slc27a4	0.000973693	-0.491983	0.054	0.077	1
Arl4d	7.24088e-15	1.06964	0.103	0.054	1.44709e-10
Mapk12	0.132421	-0.491432	0.021	0.027	1
Entpd2	7.63664e-15	1.48127	0.104	0.056	1.52618e-10
Midn	7.93804e-15	0.716705	0.261	0.186	1.58642e-10
Xylt2	0.00272069	-0.490378	0.083	0.106	1
Ybx2	8.30532e-15	2.80909	0.015	0.002	1.65982e-10
Atp2a3	0.00106353	-0.489284	0.069	0.093	1
Map9	0.136227	-0.489116	0.019	0.025	1
Tshz2	8.36724e-15	1.16857	0.095	0.049	1.67219e-10
Uap1	8.77138e-15	0.877801	0.286	0.211	1.75296e-10
Ptk7	9.90476e-15	2.81591	0.016	0.002	1.97947e-10
Pld1	0.0109311	-0.48742	0.047	0.063	1
Rhbdd1	4.42074e-05	-0.487161	0.078	0.111	0.883485
Hnrnpa1	1.00202e-14	0.303962	0.687	0.624	2.00254e-10
Pde3b	1.02004e-14	1.17716	0.062	0.026	2.03856e-10
Rps19	1.08952e-14	0.241561	0.885	0.842	2.1774e-10
Tmem158	1.12919e-14	1.81913	0.056	0.023	2.25669e-10
Tubb4a	1.28354e-14	1.11957	0.122	0.069	2.56515e-10
Tmco6	0.00568022	-0.485879	0.058	0.077	1
Mapk8	0.00505342	-0.485802	0.078	0.099	1
Otub2	0.0748155	-0.485469	0.018	0.025	1
Gtf2e1	0.00156296	-0.485231	0.033	0.051	1
Gatad1	1.38096e-14	0.307036	0.74	0.686	2.75985e-10
Ppm1f	0.0992351	-0.484947	0.027	0.035	1
Myo5a	0.0540078	-0.484639	0.042	0.053	1
Iqcc	3.57661e-05	-0.484604	0.067	0.099	0.714786
B930036N10Rik	1.40832e-14	0.977615	0.108	0.058	2.81453e-10
Glt8d2	1.41899e-14	1.95559	0.027	0.007	2.83584e-10
Gm20300	1.18951e-05	-0.484098	0.123	0.163	0.237723
Ttc9	1.47232e-14	2.94205	0.013	0.001	2.94243e-10
Srxn1	0.000781496	-0.483813	0.079	0.106	1
Bcl3	1.56435e-14	1.84892	0.034	0.01	3.12636e-10
Kat14	0.00125373	-0.483429	0.064	0.087	1
Frrs1	0.0820863	-0.483403	0.026	0.033	1
Gm12207	1.59138e-14	1.43524	0.046	0.017	3.18038e-10
Nkx2-5	0.173058	-0.4826	0.015	0.02	1
Intu	0.0683295	-0.482506	0.009	0.015	1
Tnfaip2	1.59156e-14	3.2247	0.011	0.001	3.18073e-10
Hey2	1.66495e-14	0.618128	0.36	0.284	3.3274e-10
Ankrd16	0.00606475	-0.48218	0.057	0.075	1
Arhgef5	1.27957e-05	-0.481858	0.092	0.13	0.255722
Rbms1	1.70286e-14	0.528887	0.398	0.319	3.40316e-10
C4b	1.73646e-14	1.45819	0.061	0.026	3.47032e-10
Lrg1	0.559084	-0.48141	0.009	0.01	1
Gucy1a2	1.81265e-14	1.53301	0.049	0.018	3.62259e-10
Alg3	0.00267405	-0.480868	0.062	0.083	1
Pipox	0.0360023	-0.480365	0.018	0.026	1
Eif5a2	0.00460403	-0.480278	0.049	0.067	1
Rab10os	0.00095326	-0.479869	0.09	0.117	1
Khk	0.000749944	-0.479839	0.043	0.064	1
Ypel4	0.0193544	-0.47981	0.035	0.047	1
Mgat3	1.85184e-14	2.33725	0.018	0.003	3.7009e-10
Qsox2	0.00554704	-0.479269	0.085	0.106	1
Zc3h12c	0.0256567	-0.479233	0.033	0.045	1
Uqcr10	1.87013e-14	0.232392	0.847	0.815	3.73745e-10
Rps14	2.15163e-14	0.194099	0.936	0.894	4.30003e-10
Plekha4	2.19094e-14	2.66268	0.018	0.003	4.37859e-10
D6Wsu163e	0.00317115	-0.478068	0.044	0.063	1
Ccdc137	0.00337245	-0.477581	0.061	0.081	1
Rell1	2.34783e-14	0.801575	0.156	0.096	4.69214e-10
Chd8	0.000407356	-0.477361	0.121	0.153	1
Dhodh	0.00485111	-0.476592	0.055	0.074	1
Rras2	3.98798e-06	-0.475331	0.108	0.151	0.0796997
Plcl2	2.40977e-14	4.27152	0.011	0.001	4.81593e-10
Nampt	2.42228e-14	0.507373	0.361	0.28	4.84092e-10
Hid1	0.113271	-0.474715	0.045	0.054	1
Ifi204	2.55177e-14	1.97178	0.03	0.008	5.09971e-10
Tmem254a	0.131989	-0.473698	0.01	0.014	1
Cend1	2.56277e-14	0.973839	0.123	0.07	5.12169e-10
Abcd2	2.70195e-14	3.44431	0.012	0.001	5.39985e-10
Sfxn4	0.00204347	-0.472905	0.028	0.045	1
Unc13b	0.0521202	-0.472795	0.021	0.029	1
Lpcat4	0.00010788	-0.472617	0.082	0.114	1
Polr3e	0.00601434	-0.472436	0.061	0.08	1
Zfp868	0.00192055	-0.472343	0.055	0.076	1
Il15	2.80301e-14	1.7114	0.039	0.013	5.60181e-10
Rem1	2.82198e-14	2.04058	0.046	0.017	5.63972e-10
Usp31	0.0646131	-0.471837	0.019	0.027	1
Mfap2	3.01274e-14	1.09371	0.1	0.053	6.02097e-10
Kdm5b	3.38364e-06	-0.471028	0.115	0.158	0.0676221
Wdr19	0.0572881	-0.470974	0.018	0.025	1
Ldlrad4	4.67136e-05	-0.470898	0.129	0.167	0.933571
Ppp1r3f	0.190618	-0.470792	0.032	0.039	1
Mcph1	0.175489	-0.470555	0.019	0.025	1
Pcdhga5	0.316067	-0.470507	0.009	0.012	1
Galt	4.13622e-06	-0.470313	0.123	0.167	0.0826623
Tnfsf13b	3.14243e-14	3.48875	0.014	0.002	6.28015e-10
Brd3os	0.0293388	-0.470023	0.028	0.039	1
Pigc	0.000245961	-0.469893	0.085	0.114	1
Peli1	3.35623e-14	0.53249	0.273	0.194	6.70742e-10
Kdm3b	0.000250626	-0.469532	0.074	0.103	1
Lin52	0.00342162	-0.469486	0.044	0.062	1
Usp45	0.000182355	-0.469134	0.067	0.095	1
Pdcl3	3.9959e-14	0.252633	0.836	0.798	7.98581e-10
Kazald1	4.38168e-14	0.862729	0.17	0.108	8.75679e-10
Slc29a3	0.0032576	-0.4685	0.044	0.062	1
Gm3646	4.77781e-14	4.68011	0.01	0.001	9.54846e-10
Klf7	5.00588e-14	0.397071	0.543	0.469	1.00043e-09
Olfr1034	5.15301e-14	1.49071	0.048	0.018	1.02983e-09
L2hgdh	0.00163047	-0.468004	0.046	0.066	1
Zfp518b	0.0190183	-0.467914	0.026	0.037	1
Zfp759	0.147455	-0.467884	0.012	0.017	1
Hist1h2ac	5.51984e-14	1.66	0.032	0.01	1.10314e-09
Slc38a2	6.18552e-14	0.153228	0.923	0.92	1.23618e-09
Lhfp	6.8372e-14	0.223323	0.967	0.954	1.36641e-09
6720489N17Rik	0.0625632	-0.466642	0.017	0.024	1
Zfp583	0.186839	-0.46613	0.018	0.023	1
Ppp1r1a	7.56877e-14	1.28153	0.065	0.029	1.51262e-09
Ppp1r14c	7.66032e-14	0.921062	0.137	0.082	1.53091e-09
Bbs9	0.0559235	-0.465695	0.029	0.038	1
Zfp420	0.202408	-0.465695	0.022	0.027	1
Dnajb9	9.28132e-14	0.5847	0.346	0.273	1.85487e-09
Gadd45a	1.1065e-13	0.508148	0.193	0.127	2.21134e-09
A630072M18Rik	0.00626965	-0.464795	0.028	0.042	1
Tesk2	0.258717	-0.464652	0.014	0.018	1
Psmb8	1.31912e-13	1.28338	0.05	0.02	2.63626e-09
F8a	0.00237249	-0.464364	0.048	0.067	1
Tspan12	1.41332e-13	1.18673	0.095	0.051	2.82453e-09
Gm16141	0.0154469	-0.463791	0.039	0.053	1
Bysl	0.00038147	-0.46373	0.082	0.11	1
Brca2	0.195579	-0.463444	0.023	0.029	1
Gpsm1	1.53902e-13	0.831337	0.138	0.083	3.07574e-09
Afg3l1	3.22214e-06	-0.463174	0.142	0.188	0.0643944
Prg4	1.6327e-13	2.00886	0.048	0.019	3.26295e-09
Gprc5b	1.69897e-13	1.11205	0.08	0.039	3.39538e-09
Aasdh	0.0247057	-0.462717	0.023	0.034	1
Tmem260	0.00508551	-0.462656	0.04	0.057	1
Gramd3	6.90556e-05	-0.462484	0.093	0.127	1
Zfp763	0.0182376	-0.462088	0.037	0.05	1
Csdc2	1.10287e-05	-0.461957	0.086	0.123	0.220408
Ccno	1.91993e-13	1.79477	0.031	0.009	3.83698e-09
Rnf145	2.20436e-05	-0.461799	0.126	0.167	0.440542
Brf1	0.00141185	-0.461549	0.074	0.099	1
Parp14	0.106151	-0.461531	0.022	0.029	1
Fbxl19	0.161465	-0.461285	0.017	0.022	1
6030408B16Rik	2.3727e-13	2.51905	0.016	0.003	4.74184e-09
Gcat	6.62756e-05	-0.461141	0.095	0.129	1
Fbxo36	0.007384	-0.461127	0.028	0.041	1
Fra10ac1	4.40303e-05	-0.460908	0.149	0.189	0.879945
Cenpw	8.90162e-05	-0.460852	0.097	0.131	1
Ttyh2	0.122876	-0.460619	0.021	0.027	1
Atp5l	2.80726e-13	0.161382	0.948	0.914	5.61032e-09
Clec14a	2.94828e-13	1.58365	0.028	0.008	5.89214e-09
Smg1	8.17034e-06	-0.460109	0.158	0.202	0.163284
C920021L13Rik	0.204818	-0.459812	0.012	0.017	1
Scai	0.00505174	-0.45845	0.058	0.077	1
Litaf	2.962e-13	0.635561	0.343	0.274	5.91956e-09
Syn2	0.208833	-0.457805	0.022	0.027	1
Sil1	5.34579e-05	-0.457421	0.109	0.146	1
BC024063	0.0718529	-0.457213	0.016	0.023	1
Arhgap12	6.49859e-05	-0.457186	0.1	0.136	1
Dok1	0.000226327	-0.457175	0.115	0.149	1
Zfp141	0.100523	-0.457104	0.016	0.022	1
Ptgir	3.24092e-13	1.76027	0.022	0.005	6.47699e-09
Mvk	0.000249473	-0.456561	0.081	0.11	1
Rlim	3.25523e-13	0.770448	0.214	0.149	6.50557e-09
1700019D03Rik	3.27036e-13	2.12264	0.018	0.003	6.53582e-09
Gab1	3.37313e-13	0.783507	0.166	0.108	6.7412e-09
Frmd5	4.02873e-13	2.74947	0.014	0.002	8.05141e-09
Col5a3	4.0504e-13	3.26397	0.011	0.001	8.09473e-09
Lpar6	0.104363	-0.455177	0.03	0.038	1
Fosl2	4.1601e-13	0.495823	0.322	0.246	8.31395e-09
Tyro3	0.0520765	-0.454677	0.018	0.026	1
Caprin2	4.46338e-13	0.954177	0.082	0.041	8.92006e-09
Vegfc	4.586e-13	0.673744	0.2	0.135	9.16513e-09
Epb41l2	4.66496e-13	0.588684	0.226	0.157	9.32292e-09
4833413G10Rik	0.394998	-0.453778	0.009	0.011	1
Gm26890	0.0572711	-0.453464	0.023	0.031	1
Gsdmd	4.72316e-13	1.89698	0.033	0.011	9.43924e-09
Pold1	0.0414385	-0.453325	0.024	0.033	1
Fndc10	0.207772	-0.453188	0.014	0.018	1
Slc15a4	0.00373488	-0.453004	0.075	0.096	1
Sv2a	0.000349651	-0.452757	0.045	0.068	1
9130023H24Rik	0.0790421	-0.452556	0.024	0.032	1
Pdpn	6.06573e-13	1.7804	0.022	0.005	1.21224e-08
Serp2	0.0389266	-0.451227	0.033	0.044	1
Mms19	0.00644608	-0.45115	0.052	0.07	1
Pdpr	0.0238798	-0.451071	0.024	0.035	1
Prepl	0.00495003	-0.450839	0.024	0.038	1
Optn	3.75411e-05	-0.450502	0.09	0.126	0.75026
Dtx4	6.17638e-13	1.68318	0.03	0.009	1.23435e-08
Pfkfb2	0.226262	-0.449886	0.01	0.014	1
Hsd17b7	0.0754379	-0.449723	0.032	0.041	1
Galc	0.0661507	-0.449652	0.014	0.02	1
Fxyd2	6.17852e-13	1.81311	0.034	0.011	1.23478e-08
Gstt3	0.000142182	-0.449222	0.112	0.145	1
Hr	0.000189263	-0.448496	0.088	0.118	1
Trim30a	6.38463e-13	2.30093	0.014	0.002	1.27597e-08
Tet3	5.37859e-06	-0.448249	0.136	0.181	0.107491
2900076A07Rik	4.7928e-06	-0.448168	0.09	0.13	0.095784
Sgk3	0.000243984	-0.447992	0.072	0.1	1
Atad3aos	0.385974	-0.447699	0.009	0.011	1
Inmt	6.80494e-13	3.49365	0.018	0.003	1.35997e-08
Ganab	1.43161e-05	-0.44738	0.115	0.155	0.286108
Tmcc2	6.96023e-13	0.766053	0.115	0.065	1.391e-08
Mapre2	7.06775e-13	0.643913	0.301	0.23	1.41249e-08
Ino80dos	0.150317	-0.4467	0.018	0.023	1
Ccnj	0.0829019	-0.446516	0.016	0.022	1
Ssbp2	8.6079e-13	0.312447	0.584	0.518	1.72029e-08
Mbd1	9.05386e-13	0.797448	0.149	0.093	1.80941e-08
1810041L15Rik	9.21055e-13	2.59885	0.012	0.001	1.84073e-08
Rps23	9.27171e-13	0.208643	0.942	0.903	1.85295e-08
Tmem240	0.16774	-0.444437	0.01	0.014	1
Crispld2	9.88835e-13	0.440142	0.507	0.435	1.97619e-08
Fan1	0.277491	-0.444294	0.014	0.018	1
Slc25a38	0.000456431	-0.443838	0.102	0.132	1
Nup153	0.00253859	-0.443337	0.076	0.099	1
Armc2	0.00221973	-0.443203	0.023	0.038	1
Nop58	1.024e-12	0.560786	0.378	0.305	2.04646e-08
Lrrc39	0.00787279	-0.442841	0.036	0.051	1
Maoa	6.14981e-06	-0.442767	0.107	0.148	0.122904
Sat2	0.00297375	-0.442212	0.071	0.093	1
Magoh	1.03989e-12	0.43082	0.438	0.361	2.07823e-08
Armcx4	0.100476	-0.442049	0.028	0.036	1
Thy1	1.17074e-12	1.72623	0.035	0.012	2.33973e-08
Grip2	1.20567e-12	0.627667	0.23	0.163	2.40954e-08
Xpo6	0.00124091	-0.44173	0.098	0.124	1
Cdk20	0.0155438	-0.441648	0.028	0.04	1
Abhd13	0.00178273	-0.441242	0.078	0.103	1
Sox7	1.24454e-12	3.50422	0.01	0.001	2.48722e-08
Angptl4	1.54335e-12	1.26339	0.053	0.023	3.08439e-08
Gpbar1	1.56983e-12	1.51326	0.043	0.016	3.1373e-08
Prkcg	0.186054	-0.43987	0.009	0.013	1
Rasgef1b	1.66283e-12	3.05595	0.012	0.002	3.32317e-08
Htra4	1.86308e-12	1.32112	0.051	0.021	3.72337e-08
Slc16a4	0.084084	-0.439343	0.009	0.014	1
Endou	1.8993e-12	1.88325	0.018	0.004	3.79576e-08
Gm15677	2.00726e-12	3.92538	0.01	0.001	4.0115e-08
Gss	0.000421363	-0.438285	0.096	0.125	1
Hfe2	2.05151e-12	3.57667	0.01	0.001	4.09995e-08
Mcur1	2.43307e-12	0.499555	0.348	0.275	4.86249e-08
Zmym4	7.79434e-05	-0.437555	0.111	0.147	1
Klf5	0.44286	-0.43749	0.009	0.011	1
Slc39a3	0.000226281	-0.43739	0.087	0.117	1
Ubtd1	0.000272844	-0.437165	0.072	0.1	1
Slc16a2	2.48687e-12	0.753684	0.151	0.096	4.97001e-08
Nacc1	1.92527e-05	-0.435886	0.124	0.165	0.384765
Gm12216	2.6183e-12	1.11575	0.045	0.018	5.23266e-08
Ripor2	2.71285e-12	2.67046	0.013	0.002	5.42162e-08
Il27ra	2.73523e-12	2.70509	0.013	0.002	5.46636e-08
Rad9b	0.315176	-0.435464	0.012	0.016	1
Polr3f	0.000631602	-0.435373	0.083	0.111	1
Fbxl12	0.00171634	-0.435158	0.055	0.076	1
Bag4	0.0366435	-0.43514	0.051	0.064	1
Sort1	3.11915e-12	0.765452	0.214	0.152	6.23363e-08
Cdpf1	8.02901e-06	-0.434992	0.135	0.179	0.16046
Sh3d19	6.44936e-06	-0.434831	0.103	0.144	0.12889
Retreg1	3.18791e-12	1.40076	0.061	0.029	6.37104e-08
Rplp2	3.19226e-12	0.146006	0.972	0.954	6.37973e-08
Gstm4	0.0246636	-0.434315	0.041	0.054	1
Cidea	0.00121532	-0.434217	0.126	0.155	1
Has2	3.26367e-12	2.95193	0.011	0.001	6.52244e-08
Fam89b	0.00849337	-0.433755	0.026	0.038	1
Dcun1d2	0.000365315	-0.43374	0.07	0.098	1
Prr5	3.35425e-12	3.04379	0.012	0.002	6.70347e-08
Tor4a	0.0896029	-0.43333	0.016	0.022	1
Zfp101	0.0458052	-0.432939	0.041	0.052	1
Ddx19b	0.101512	-0.432324	0.031	0.039	1
Dtx3l	0.00477851	-0.432258	0.056	0.075	1
Dopey1	0.00188963	-0.431931	0.09	0.115	1
Rims1	3.63413e-12	2.49166	0.016	0.003	7.2628e-08
Strada	0.00393458	-0.431756	0.083	0.106	1
Spa17	0.0710592	-0.431739	0.039	0.049	1
Arhgap32	0.0379156	-0.431535	0.041	0.053	1
Zfp595	0.0748656	-0.431376	0.014	0.02	1
Col16a1	3.80828e-12	0.638534	0.18	0.12	7.61085e-08
Palm	6.78298e-06	-0.430898	0.189	0.238	0.135558
Gm20696	0.00594985	-0.430827	0.028	0.042	1
Shox2	3.91499e-12	2.36076	0.014	0.002	7.82411e-08
2310057M21Rik	4.77687e-05	-0.430501	0.108	0.145	0.954657
Il18	3.99375e-12	1.0654	0.058	0.026	7.98152e-08
Phlda1	4.03544e-12	1.07891	0.246	0.185	8.06482e-08
Prkca	0.000713616	-0.430131	0.091	0.119	1
Rbm12b2	0.0150861	-0.429902	0.032	0.045	1
Mblac2	0.0130739	-0.429861	0.037	0.051	1
Uqcr11	4.16188e-12	0.214295	0.892	0.847	8.31752e-08
Snhg12	4.56875e-12	0.641843	0.249	0.183	9.13064e-08
Tsc1	0.00568414	-0.42839	0.044	0.061	1
Cxcr4	5.1526e-12	2.64049	0.014	0.002	1.02975e-07
Enkd1	0.0564159	-0.4283	0.028	0.037	1
Fnbp4	5.96683e-05	-0.428099	0.105	0.141	1
Isg20	5.21157e-12	1.94272	0.023	0.006	1.04153e-07
Cyb5rl	0.0126701	-0.427869	0.015	0.025	1
Adat2	0.00151658	-0.427754	0.075	0.1	1
Fam117b	0.0612171	-0.427641	0.052	0.063	1
Ttc7	5.51212e-12	1.21406	0.051	0.022	1.1016e-07
Wnt11	5.71219e-12	2.45765	0.012	0.002	1.14158e-07
Lrp8	0.546468	-0.427077	0.01	0.011	1
Eef1d	5.9673e-12	0.210022	0.821	0.778	1.19256e-07
Synj2	0.0021993	-0.426438	0.083	0.107	1
Card10	6.01994e-12	3.04507	0.01	0.001	1.20308e-07
Zbtb18	0.02177	-0.425864	0.04	0.053	1
Lrrn2	6.41904e-12	2.32319	0.015	0.003	1.28285e-07
Armc7	0.605192	-0.425245	0.014	0.015	1
Zw10	0.000140022	-0.425035	0.086	0.118	1
Meox1	6.55065e-12	2.10543	0.015	0.003	1.30915e-07
Rpl26	7.01885e-12	0.177634	0.951	0.91	1.40272e-07
Xndc1	0.164813	-0.424621	0.037	0.044	1
Sacs	0.00314492	-0.424581	0.123	0.149	1
Apol9a	0.0909647	-0.424513	0.008	0.013	1
Adamts4	7.19444e-12	1.97592	0.022	0.006	1.43781e-07
Cptp	0.0143434	-0.42398	0.037	0.051	1
Pccb	0.012666	-0.423683	0.08	0.099	1
Cic	0.000695173	-0.423295	0.108	0.138	1
Dynll1	7.20405e-12	0.14538	0.989	0.977	1.43973e-07
Cspp1	2.84119e-05	-0.422874	0.189	0.233	0.567811
Magi2	1.50032e-05	-0.422739	0.12	0.161	0.299839
Ywhae	7.39506e-12	0.21843	0.83	0.795	1.4779e-07
Fam199x	0.00661247	-0.421938	0.053	0.071	1
Phactr1	2.94635e-05	-0.421588	0.143	0.185	0.588828
Kptn	0.00518362	-0.421282	0.055	0.074	1
Tcf20	0.00361285	-0.421255	0.07	0.092	1
Lig3	0.00913177	-0.421245	0.048	0.064	1
Riiad1	7.6701e-12	2.28314	0.019	0.004	1.53287e-07
Cbx4	7.72855e-12	0.657091	0.168	0.111	1.54455e-07
Mlph	0.063017	-0.421001	0.023	0.031	1
Invs	5.8671e-05	-0.420734	0.064	0.094	1
Casp8	0.00253907	-0.420719	0.074	0.096	1
Hist1h3a	8.35872e-12	1.86495	0.027	0.008	1.67049e-07
Tiam2	0.576371	-0.420196	0.017	0.019	1
Arid3a	0.235838	-0.419401	0.009	0.012	1
Snx18	8.3926e-12	0.309911	0.66	0.603	1.67726e-07
Phkg2	0.000258584	-0.418737	0.104	0.136	1
Zfp691	0.0111936	-0.418725	0.043	0.059	1
Cib2	8.99058e-12	0.731548	0.186	0.127	1.79677e-07
Dph6	0.00903523	-0.418613	0.085	0.105	1
Xrcc4	3.07953e-05	-0.418465	0.132	0.173	0.615445
2010315B03Rik	0.13295	-0.418367	0.027	0.034	1
Ppp2r5b	9.86073e-05	-0.418201	0.107	0.142	1
Ints4	0.00956945	-0.418112	0.054	0.072	1
Tmtc3	0.00450029	-0.418005	0.09	0.113	1
Atp5j	1.02153e-11	0.167688	0.939	0.921	2.04152e-07
Wdtc1	0.00028604	-0.417805	0.141	0.175	1
Tspyl2	0.00545679	-0.417662	0.1	0.123	1
Dync2h1	0.0115014	-0.41731	0.057	0.074	1
Irf7	1.06287e-11	1.04633	0.044	0.018	2.12414e-07
Entpd7	0.00424768	-0.417153	0.062	0.082	1
Ap5s1	0.00130274	-0.416765	0.064	0.087	1
Pttg1	1.1202e-11	1.27496	0.059	0.028	2.23872e-07
Tead2	1.13664e-11	1.07119	0.081	0.042	2.27157e-07
Fktn	0.000256115	-0.416168	0.092	0.124	1
Dclre1a	0.0136112	-0.415497	0.039	0.053	1
Aggf1	1.17321e-11	0.653927	0.239	0.174	2.34466e-07
Zfp729a	0.0400184	-0.415043	0.044	0.056	1
Rnf219	0.0116753	-0.41493	0.065	0.082	1
Prelid3a	0.0173587	-0.414911	0.011	0.02	1
Nudt8.1	0.335556	-0.414617	0.01	0.013	1
Ccbe1	1.17771e-11	2.74988	0.012	0.002	2.35366e-07
Gm9008	0.0288368	-0.414167	0.028	0.039	1
Trit1	0.00538461	-0.414074	0.033	0.049	1
Gab2	0.00197869	-0.41402	0.107	0.133	1
Rabif	0.000234872	-0.413697	0.126	0.16	1
Mast2	0.000791633	-0.413668	0.087	0.114	1
Usp12	0.00366286	-0.413485	0.077	0.098	1
Atp5c1	1.28273e-11	0.177079	0.895	0.862	2.56353e-07
Uhrf1bp1l	2.851e-06	-0.413088	0.148	0.197	0.0569773
Slc25a37	0.00581669	-0.412936	0.064	0.083	1
Zfp712	0.39796	-0.41259	0.019	0.022	1
A330041J22Rik	0.0591478	-0.41252	0.013	0.02	1
Wdfy3	0.000586546	-0.412364	0.095	0.124	1
Zfp365	1.26897e-05	-0.412163	0.114	0.154	0.253603
Map1lc3a	1.29667e-11	0.197479	0.932	0.91	2.5914e-07
Mosmo	1.32036e-11	0.37878	0.447	0.376	2.63874e-07
Sncaip	0.0102993	-0.411226	0.067	0.086	1
Gk5	0.0173356	-0.41047	0.04	0.053	1
Hmgb3	0.00945988	-0.410353	0.034	0.048	1
Rnd1	1.4259e-11	1.31363	0.074	0.038	2.84966e-07
Rps11	1.47374e-11	0.153229	0.97	0.941	2.94527e-07
Gpc1	3.72273e-06	-0.409179	0.142	0.189	0.0743988
Gm15614	1.55236e-11	1.53026	0.037	0.014	3.1024e-07
Sdsl	1.64982e-11	1.088	0.061	0.029	3.29716e-07
Zfp952	0.0280022	-0.408388	0.035	0.046	1
Smurf1	1.69616e-11	0.724289	0.148	0.095	3.38977e-07
Tmem201	0.0531393	-0.407703	0.042	0.053	1
Prr14l	0.0550839	-0.407502	0.037	0.048	1
Map3k14	0.221714	-0.407484	0.027	0.033	1
Drd1	1.73712e-11	2.66845	0.012	0.002	3.47163e-07
Dusp14	0.00185106	-0.406502	0.045	0.064	1
Apobec1	0.0719916	-0.406463	0.018	0.025	1
Helz	3.59831e-05	-0.40643	0.123	0.162	0.719123
Cgnl1	1.76392e-11	0.946907	0.117	0.071	3.5252e-07
Slc35a3	0.0120973	-0.406095	0.039	0.053	1
Stard4	0.234875	-0.406018	0.036	0.042	1
Top2a	1.95901e-11	1.42229	0.039	0.015	3.91508e-07
Acan	2.09952e-11	1.1306	0.075	0.039	4.1959e-07
Mtg2	1.94519e-05	-0.405487	0.155	0.2	0.388746
Jam2	2.25296e-11	1.24491	0.052	0.023	4.50254e-07
Mettl4	0.227111	-0.405129	0.02	0.025	1
Ago1	0.0007323	-0.4051	0.075	0.101	1
Zer1	4.47987e-05	-0.404924	0.141	0.182	0.895301
AU022252	0.0058438	-0.404861	0.051	0.069	1
Calm3	2.33631e-11	0.207063	0.855	0.832	4.66911e-07
Naif1	0.403772	-0.404804	0.012	0.015	1
Npm1	2.42716e-11	0.184906	0.866	0.832	4.85067e-07
Commd5	0.0312215	-0.404549	0.022	0.031	1
Aspscr1	0.00141522	-0.404546	0.132	0.161	1
Cdc25b	0.019083	-0.404318	0.048	0.062	1
Kdm6a	0.000413973	-0.404206	0.126	0.158	1
Kri1	0.0750736	-0.404125	0.027	0.035	1
Cdc45	0.290753	-0.403673	0.013	0.016	1
Arhgdib	2.48486e-11	0.605599	0.243	0.178	4.966e-07
Clec16a	0.00799329	-0.402751	0.045	0.062	1
Ifih1	2.4905e-11	1.53488	0.027	0.008	4.97727e-07
Ndufb10	2.73086e-11	0.234299	0.774	0.734	5.45762e-07
Rnf144b	0.0709068	-0.40229	0.032	0.041	1
Lamb1	2.78726e-11	1.7204	0.033	0.012	5.57034e-07
Rpl38	2.8677e-11	0.139639	0.99	0.971	5.73111e-07
Syp	3.31908e-11	1.87426	0.023	0.006	6.63319e-07
Vars	0.000588799	-0.401788	0.117	0.148	1
Psmb10	3.46864e-11	0.684247	0.15	0.097	6.93209e-07
Glb1	0.0573611	-0.401725	0.033	0.043	1
Rnf213	0.100365	-0.401255	0.02	0.027	1
Ing4	0.000170476	-0.401009	0.134	0.169	1
Ank2	0.00218551	-0.400935	0.102	0.128	1
Gm16973	0.225131	-0.400834	0.012	0.016	1
Trf	3.52443e-11	1.75479	0.044	0.018	7.04358e-07
AW549877	5.99241e-05	-0.400631	0.161	0.201	1
Zfp128	0.340009	-0.400302	0.012	0.015	1
CAAA01147332.1	0.02508	-0.400277	0.026	0.036	1
Asxl2	0.00250071	-0.400241	0.1	0.125	1
Rpl37	3.60528e-11	0.12538	0.998	0.994	7.20515e-07
Nup210l	3.70641e-11	2.94142	0.012	0.002	7.40727e-07
Cep41	0.000936974	-0.399568	0.029	0.047	1
Gfm1	4.1851e-11	0.568648	0.262	0.197	8.36393e-07
Hip1r	0.000159371	-0.399414	0.098	0.132	1
Fam98a	5.65629e-06	-0.399226	0.117	0.16	0.113041
Rnf111	0.000886642	-0.399005	0.107	0.135	1
Gng2	0.153569	-0.398903	0.014	0.019	1
Slc9a1	0.0502426	-0.398895	0.055	0.067	1
Fbxw7	0.00464593	-0.398619	0.078	0.099	1
Fscn1	4.33836e-11	2.28292	0.015	0.003	8.67021e-07
1600002K03Rik	0.000127341	-0.398556	0.079	0.111	1
Tbc1d8b	0.0254086	-0.398299	0.044	0.058	1
Sept4	4.37238e-11	1.03598	0.12	0.074	8.7382e-07
Mme	4.47168e-11	1.75756	0.016	0.003	8.93665e-07
Gcn1l1	0.000865708	-0.397305	0.125	0.155	1
Csf2ra	0.0269447	-0.39729	0.022	0.032	1
D10Wsu102e	0.019853	-0.397224	0.064	0.08	1
Arhgef10l	2.66275e-05	-0.397211	0.218	0.265	0.532151
Ccdc68	7.86708e-06	-0.397151	0.154	0.201	0.157224
Ppl	4.49035e-11	2.07755	0.016	0.003	8.97397e-07
C1qtnf12	0.00929273	-0.396991	0.09	0.11	1
Eva1c	3.32673e-06	-0.396746	0.152	0.201	0.0664847
Pogz	0.0637715	-0.39647	0.064	0.076	1
Usmg5	4.56962e-11	0.201451	0.884	0.841	9.13239e-07
Idh3b	4.93783e-11	0.372713	0.566	0.509	9.86825e-07
Brwd1	3.21835e-05	-0.395728	0.178	0.222	0.643187
Dsel	4.96924e-11	0.632323	0.238	0.176	9.93103e-07
Pnldc1	0.00942608	-0.395127	0.047	0.064	1
Tmem50b	3.5282e-05	-0.395086	0.153	0.194	0.705111
1700001O22Rik	0.365271	-0.395068	0.007	0.01	1
Abcd1	0.0180618	-0.39503	0.049	0.064	1
Inpp5j	0.367142	-0.394538	0.007	0.01	1
Dmtn	0.000653084	-0.394501	0.064	0.089	1
Znfx1	0.019155	-0.394394	0.068	0.085	1
Pced1b	0.00720845	-0.394288	0.049	0.066	1
Rtkn	0.566202	-0.394146	0.02	0.023	1
Rps21	4.9913e-11	0.119395	0.996	0.992	9.97511e-07
Ppp1r13b	0.0269302	-0.393792	0.054	0.069	1
Ehd3	5.42539e-11	0.890735	0.124	0.078	1.08426e-06
Daglb	1.00575e-05	-0.393547	0.137	0.18	0.201
C2	5.46199e-11	2.95563	0.019	0.005	1.09158e-06
Gm17455	0.288992	-0.393467	0.009	0.011	1
Mthfd1l	0.198211	-0.393425	0.015	0.019	1
Pter	0.0431341	-0.393405	0.053	0.066	1
Zfp398	0.000184512	-0.39315	0.09	0.122	1
Mcm3ap	0.019444	-0.392887	0.047	0.061	1
Fam69a	5.58526e-11	0.682551	0.194	0.137	1.11621e-06
Abi3	0.0191732	-0.392153	0.031	0.043	1
Bcl2l11	5.71794e-11	1.15279	0.049	0.022	1.14273e-06
Tctn1	0.0488508	-0.39176	0.029	0.039	1
Pacsin2	5.94103e-11	0.361159	0.612	0.562	1.18731e-06
2810454H06Rik	6.24535e-11	0.833998	0.059	0.028	1.24813e-06
Tars2	0.0241354	-0.391434	0.056	0.07	1
S100a6	6.34281e-11	0.176417	0.983	0.991	1.26761e-06
Megf8	0.0617349	-0.391069	0.062	0.074	1
Cox17	6.47572e-11	0.251195	0.765	0.732	1.29417e-06
Gli3	0.848738	-0.390338	0.02	0.019	1
Tnpo1	0.000115265	-0.389943	0.159	0.197	1
Pcx	0.112961	-0.389681	0.012	0.017	1
Wfikkn2	0.13898	-0.389475	0.016	0.021	1
Stx16	5.64304e-05	-0.389443	0.154	0.195	1
Sharpin	0.000197346	-0.389395	0.134	0.171	1
Gm16845	0.353654	-0.389311	0.015	0.018	1
Stard3nl	6.48111e-11	0.374001	0.432	0.359	1.29525e-06
Tango6	0.0207804	-0.389185	0.033	0.046	1
1700086O06Rik	0.187362	-0.389091	0.015	0.019	1
Gm45076	6.62788e-11	1.29373	0.041	0.017	1.32458e-06
Dgcr8	0.00312885	-0.388695	0.066	0.087	1
Abhd11	0.000605704	-0.388507	0.116	0.147	1
Ascc3	0.000211347	-0.387965	0.144	0.179	1
Dcbld1	0.236253	-0.387944	0.011	0.014	1
Fbxo34	0.0172855	-0.387942	0.07	0.087	1
Prkg1	6.6413e-11	0.546969	0.33	0.267	1.32726e-06
Ppp1r3a	7.56974e-11	2.91887	0.014	0.002	1.51281e-06
Proser3	0.101273	-0.387322	0.028	0.036	1
Vezt	0.0350528	-0.387281	0.064	0.078	1
Camkmt	0.194661	-0.387239	0.007	0.01	1
Stim2	4.57951e-05	-0.387083	0.105	0.143	0.915216
Sp140	6.5141e-05	-0.386343	0.066	0.096	1
March9	0.00791204	-0.386292	0.034	0.049	1
Stk26	0.00230052	-0.386064	0.047	0.066	1
1700048O20Rik	0.076263	-0.385935	0.014	0.021	1
Epm2aip1	0.0933996	-0.385826	0.07	0.081	1
Tnk2	0.000570358	-0.38579	0.13	0.162	1
Mecomos	7.74134e-11	1.68364	0.022	0.006	1.54711e-06
Slc38a9	0.000763919	-0.385517	0.064	0.089	1
Sgsh	0.00588813	-0.385514	0.037	0.052	1
Sfi1	0.000969225	-0.385172	0.07	0.095	1
Sap30	8.54061e-11	1.11436	0.073	0.038	1.70684e-06
Rapgef2	1.40052e-05	-0.384881	0.11	0.15	0.279894
Bend7	0.0543701	-0.384755	0.026	0.035	1
mt-Nd6	2.01929e-05	-0.384602	0.14	0.182	0.403554
Cipc	0.0142058	-0.384583	0.057	0.073	1
Chd2	0.000162696	-0.384428	0.132	0.168	1
Ttll4	0.300323	-0.384301	0.016	0.02	1
Pde7b	8.76329e-11	2.73277	0.014	0.003	1.75134e-06
Hif1an	0.0258457	-0.384025	0.036	0.048	1
Tpbg	8.94098e-11	1.37961	0.028	0.009	1.78686e-06
Cstf2t	0.00152321	-0.383711	0.066	0.089	1
Gcnt2	9.06015e-11	0.470115	0.345	0.278	1.81067e-06
Hey1	9.06746e-11	0.890631	0.087	0.049	1.81213e-06
Btbd10	9.11571e-11	0.543566	0.272	0.208	1.82177e-06
Rogdi	0.000243124	-0.383088	0.116	0.149	1
Nob1	0.00123985	-0.383054	0.113	0.142	1
Slc8a1	0.00160165	-0.382861	0.065	0.089	1
Alg8	0.104989	-0.382525	0.016	0.023	1
Yod1	9.33602e-05	-0.382188	0.137	0.175	1
Mansc1	0.00275218	-0.38197	0.069	0.092	1
Sgsm3	0.00280227	-0.38195	0.036	0.053	1
Ube2s	9.16859e-11	0.314867	0.635	0.587	1.83234e-06
Gm26545	9.19875e-11	2.14733	0.016	0.004	1.83837e-06
Kbtbd7	0.0282744	-0.381399	0.041	0.054	1
Ankrd13a	0.00020354	-0.381203	0.128	0.164	1
Per3	0.208569	-0.381203	0.059	0.067	1
Smim20	3.36192e-06	-0.381195	0.184	0.235	0.067188
Armc9	0.0255629	-0.380825	0.041	0.054	1
Dcxr	0.00054164	-0.380805	0.112	0.142	1
Apod	9.3173e-11	3.33388	0.016	0.003	1.86206e-06
Alg9	0.0362752	-0.380665	0.041	0.053	1
Rnf26	0.0771728	-0.380509	0.057	0.068	1
Snx8	0.108267	-0.380504	0.023	0.03	1
Cenpk	0.17153	-0.380349	0.006	0.01	1
Dffa	0.0499999	-0.380185	0.023	0.031	1
Sec24a	0.00651395	-0.38012	0.131	0.155	1
Tmem136	0.000235023	-0.380029	0.125	0.16	1
Zfp329	0.000145574	-0.380024	0.132	0.169	1
Nnmt	9.48076e-11	2.32355	0.015	0.003	1.89473e-06
Dhtkd1	0.548967	-0.379948	0.012	0.014	1
Etv1	1.3488e-05	-0.379791	0.151	0.197	0.269558
Cep97	0.171032	-0.379642	0.027	0.034	1
Tfpi	9.58927e-11	0.790937	0.111	0.066	1.91642e-06
Omd	1.00441e-10	0.513892	0.284	0.214	2.00731e-06
Dhx57	0.0642052	-0.379483	0.044	0.055	1
Fkbp15	0.00384119	-0.379456	0.045	0.064	1
Fbxo10	0.121385	-0.379421	0.015	0.02	1
Gm26632	0.514456	-0.378887	0.02	0.022	1
Prx	0.168343	-0.378784	0.015	0.02	1
Mbd4	0.177699	-0.378604	0.022	0.027	1
Phc3	3.7708e-05	-0.377854	0.15	0.193	0.753594
Cyb561d2	0.00801305	-0.377788	0.063	0.082	1
B3gntl1	0.283916	-0.377702	0.014	0.017	1
Hfe	1.08812e-10	1.56352	0.034	0.013	2.17461e-06
4833418N02Rik	1.24332e-10	1.17394	0.056	0.027	2.48477e-06
Slc2a4	1.26262e-10	0.713062	0.162	0.11	2.52335e-06
2510002D24Rik	0.000249003	-0.376704	0.167	0.203	1
Lrrc14	0.0107538	-0.376445	0.059	0.076	1
Asb4	1.27983e-10	1.94572	0.023	0.007	2.55775e-06
Mylip	1.39128e-10	0.881467	0.106	0.064	2.78048e-06
Atf6	0.000636864	-0.376052	0.098	0.128	1
Ankrd39	0.000588026	-0.376013	0.179	0.211	1
Vcpip1	0.00362635	-0.375901	0.133	0.159	1
Lrfn3	0.0286963	-0.375711	0.028	0.039	1
9330179D12Rik	0.245689	-0.375385	0.022	0.027	1
Pigs	0.000242932	-0.375308	0.096	0.128	1
Zfp280b	0.36501	-0.375014	0.018	0.021	1
Prmt6	0.105525	-0.374963	0.034	0.042	1
Dmxl1	8.59171e-05	-0.374766	0.152	0.192	1
Helb	0.108359	-0.374543	0.026	0.033	1
Rtn1	1.39711e-10	1.67537	0.02	0.005	2.79212e-06
Cd320	0.00200642	-0.37404	0.102	0.128	1
Dock7	1.48748e-05	-0.373633	0.176	0.223	0.297273
Fam53a	7.88582e-06	-0.373307	0.213	0.261	0.157598
Slx1b	0.00716271	-0.37317	0.044	0.06	1
[truncated: 6,925 more rows]

## Sheet: CoGAP_PatternMarkers4
	Pattern_4
1	Rb1cc1
2	Cops5
3	Cpa6
4	Sbspon
5	Eloc
6	Rims1
7	Smap1
8	Plekhb2
9	Txndc9
10	Pdcl3
11	Gm3646
12	Tmem182
13	Fhl2
14	Gm28151
15	Myo1b
16	Rftn2
17	Spats2l
18	Cdk15
19	Gm973
20	Sumo1
21	Ndufs1
22	Klf7
23	Map2
24	Acadl
25	Myl1
26	Gpbar1
27	Aamp
28	Pnkd
29	Slc11a1
30	Ctdsp1
31	Dnajb2
32	Speg
33	Slc4a3
34	Wdfy1
35	Cul3
36	Mff
37	Cab39
38	Gm29371
39	Efhd1
40	Ndufa10
41	Rnpepl1
42	Stk25
43	Gal3st2
44	Rnf152
45	Gm17634
46	Actr3
47	Map3k19
48	Mapkapk2
49	Nucks1
50	Tmcc2
51	Timm17a
52	Csrp1
53	Kif14
54	A430106G13Rik
55	Nek7
56	Fam129a
57	Smg7
58	Nmnat2
59	Tor1aip1
60	Rasal2
61	Brinp2
62	Astn1
63	Cop1
64	Tnr
65	Gm38039
66	Selp
67	Tiprl
68	Rcsd1
69	Mgst3
70	Rxrg
71	Rgs4
72	4930500M09Rik
73	Sdhc
74	Mpz
75	Pcp4l1
76	Ndufs2
77	Dcaf8
78	Fh1
79	Desi2
80	Gm31728
81	Stum
82	Cnih4
83	Wdr26
84	Hlx
85	Mark1
86	4930532G15Rik
87	Gm26574
88	Gm15867
89	Gm16897
90	Fam107b
91	Phyh
92	Ccdc3
93	Camk1d
94	Rbm17
95	Gm37565
96	Hacd1
97	Gm10848
98	Commd3
99	Pip4k2a
100	4930426L09Rik
101	Armc3
102	Acbd5
103	Yme1l1
104	Psd4
105	Cacna1b
106	Nrarp
107	Kcnt1
108	Nacc2
109	Notch1
110	Brd3
111	Gbgt1
112	Gm13420
113	Tor1b
114	BC005624
115	Ncs1
116	Fubp3
117	Lcn2
118	9430097D07Rik
119	Pbx3
120	Mapkap1
121	Fbxw2
122	Hc
123	Stom
124	Dab2ip
125	Gpr21
126	Olfml2a
127	Rnd3
128	Cacnb4
129	Prpf40a
130	Gm13620
131	Cobll1
132	Slc38a11
133	Scn3a
134	Klhl23
135	Erich2
136	Tlk1
137	Map3k20
138	Atp5g3
139	Pjvk
140	Pde1a
141	Zc3h15
142	Ssrp1
143	Ndufs3
144	Celf1
145	Psmc3
146	Pacsin3
147	Arhgap1
148	2900072N19Rik
149	Cd82
150	Gm13889
151	Arhgap11a
152	Actc1
153	D330050G23Rik
154	Thbs1
155	Bub1b
156	Inafm2
157	Ivd
158	1700020I14Rik
159	Rtf1
160	Zfp106
161	Serinc4
162	Mfap1a
163	Frmd5
164	Eif3j1
165	Slc24a5
166	Myef2
167	Secisbp2l
168	Fam227b
169	Mrps5
170	Idh3b
171	Tmx4
172	Cd93
173	Acss1
174	Pygb
175	Angpt4
176	Fam110a
177	Slc52a3
178	Tcf15
179	Cox4i2
180	Bcl2l1
181	Commd7
182	Mapre1
183	Trp53inp2
184	Dlgap4
185	Ndrg3
186	Mroh8
187	Tgm2
188	Ppp1r16b
189	Pkig
190	Dbndd2
191	Gm20716
192	Rbm38
193	Vapb
194	Npepl1
195	Gm11008
196	Lama5
197	Ythdf1
198	Ptk6
199	Tpd52l2
200	Oprl1
201	B630019K06Rik
202	Araf
203	Slc25a5
204	Sept6
205	Gpc4
206	Ccdc160
207	3830403N18Rik
208	Fmr1os
209	Cetn2
210	Emd
211	Gdi1
212	Fam50a
213	Lage3
214	Gm14827
215	Gm39526
216	Pdzd11
217	Il2rg
218	Nono
219	Rtl5
220	Pgk1
221	Hmgn5
222	Rps6ka6
223	Nap1l3
224	Btk
225	Hnrnph2
226	Bex4
227	Bex1
228	Spin2c
229	Map7d2
230	Pdha1
231	Asb11
232	Zc2hc1a
233	Zfp704
234	Car3
235	Bhlhe22
236	Gyg
237	Tmem212
238	Mecomos
239	Zfp639
240	Fxr1
241	Dcun1d1
242	Trpc3
243	Larp1b
244	Elf2
245	Mgst2
246	Gm43803
247	Ccdc169
248	Selenot
249	Sucnr1
250	Dhx36
251	Kcnab1
252	A730090N16Rik
253	Mlf1
254	Gfm1
255	Lxn
256	Rarres1
257	1110032F04Rik
258	Smc4
259	Kpna4
260	Ppm1l
261	Pdcd10
262	Serpini1
263	Gucy1a1
264	Tmem131l
265	Trim2
266	Gm37876
267	Pear1
268	Mef2d
269	Arhgef2
270	Gm20652
271	Dcst2
272	Gatad2b
273	Psmd4
274	Gm16740
275	Mllt11
276	Cdc42se1
277	BC028528
278	Plekho1
279	Gm15444
280	Gm20628
281	Hfe2
282	Notch2
283	Tspan2
284	Hipk1
285	Ptpn22
286	Phtf1os
287	Rap1a
288	I830077J02Rik
289	Ahcyl1
290	1700010K24Rik
291	Sort1
292	4933405D12Rik
293	Fam241a
294	Enpep
295	Mcub
296	Gm42997
297	Hadh
298	Gm43689
299	Eif4e
300	Pkn2
301	Ddah1
302	Gm10636
303	Samd13
304	Prkacb
305	Ttll7
306	Rabggtb
307	Acadm
308	Zranb2
309	Ptger3
310	AI838599
311	Fam110b
312	Runx1t1
313	Cngb3
314	Tmem215
315	Chmp5
316	Gm10600
317	Gm12395
318	Tesk1
319	Hrct1
320	Glipr2
321	Aldob
322	Tmem38b
323	Pakap
324	Akap2
325	Slc46a2
326	Alad
327	Adamtsl1
328	Klhl9
329	Mtap
330	Cdkn2a
331	L1td1
332	Angptl3
333	Mier1
334	Ttc22
335	Fam159a
336	Ttc39a
337	Cdkn2c
338	Trabd2b
339	Tal1
340	Cyp4b1
341	Pomgnt1
342	Hpdl
343	Cap1
344	Heyl
345	Utp11
346	Sf3a3
347	Inpp5b
348	Rspo1
349	Zc3h12a
350	Mrps15
351	Stk40
352	Thrap3
353	5730409E04Rik
354	Smim12
355	Gja4
356	Rbbp4
357	Pef1
358	Tinagl1
359	Laptm5
360	Epb41
361	Gm12999
362	Themis2
363	Fam76a
364	Tmem57
365	Syf2
366	Srsf10
367	Hnrnpr
368	Kdm1a
369	Sh2d5
370	Pla2g2d
371	Sdhb
372	Efhd2
373	Gm29367
374	4930455G09Rik
375	Tmem51
376	Tmem51os1
377	Pramef12os
378	Dhrs3
379	Fv1
380	Gm13205
381	Eno1
382	Camta1
383	Acot7
384	Smim1
385	Arhgef16
386	Cdk11b
387	AW011738
388	4833413G10Rik
389	Crot
390	Gm40264
391	Pmpcb
392	Klhl7
393	Kcnh2
394	Atg9b
395	Cdk5
396	Asb10
397	Smarcd3
398	Nub1
399	Prkag2
400	Dnajb6
401	Hadha
402	Hadhb
403	Kcnk3
404	Tcf23
405	Trim54
406	Snx17
407	Ppm1g
408	Ctbp1
409	Nat8l
410	Afap1
411	Grpel1
412	Msx1
413	Wdr1
414	4930513D17Rik
415	Gm15866
416	Dhx15
417	Rell1
418	Klf3
419	Rfc1
420	Ube2k
421	Apbb2
422	Uchl1
423	Corin
424	Nipal1
425	Ociad1
426	Ociad2
427	Gm7467
428	Paics
429	Ythdc1
430	Csn3
431	Parm1
432	Art3
433	Sept11
434	Prkg2
435	Hnrnpd
436	Coq2
437	Slc10a6
438	Hsd17b13
439	Evi5
440	Pitpnb
441	C130026L21Rik
442	Crybb3
443	2900026A02Rik
444	Coro1c
445	Acads
446	Cabp1
447	Rnf10
448	Gm42903
449	9530046B11Rik
450	Wsb2
451	Tesc
452	Hrk
453	Tbx3os1
454	Gm16064
455	Tbx3
456	Tbx5
457	Lhx5
458	Sdsl
459	Vps29
460	Gm2479
461	B3gnt4
462	Clip1
463	Rsrc2
464	Vps37b
465	Arl6ip4
466	Kmt5a
467	Rilpl1
468	4930404A12Rik
469	Nipsnap2
470	Hip1
471	Mdh2
472	Hspb1
473	Ywhag
474	Rasa4
475	Cux1
476	Cops6
477	Pdgfa
478	Adap1
479	Gper1
480	Mafk
481	Eif3b
482	Gna12
483	Fam220a
484	Cyth3
485	Ccz1
486	Baiap2l1
487	Nptx2
488	Gm42791
489	Hsph1
490	Gm42556
491	N4bp2l2
492	Gng11
493	Pon2
494	Tmem106b
495	Cttnbp2
496	Lsm8
497	Tspan33
498	Ube2h
499	Akr1b7
500	Gm13861
501	1810058I24Rik
502	Creb3l2
503	4930599N23Rik
504	Cul1
505	Sspo
506	Gimap1
507	Tmem176b
508	Tmem176a
509	Cycs
510	C530044C16Rik
511	Jazf1
512	Chn2
513	Prr15
514	Serbp1
515	Igkc
516	Krcc1
517	Chmp3
518	Reep1
519	Immt
520	Reg3a
521	Dctn1
522	Actg2
523	Gm21284
524	Gm44386
525	Anxa4
526	H1fx
527	Mgll
528	Slc6a6
529	Grip2
530	Lmod3
531	Cntn3
532	Itpr1
533	Camk1
534	Ghrl
535	Slc6a1
536	Syn2
537	Raf1
538	Zfp422
539	Atp6v1e1
540	C1s1
541	Gm16567
542	Grcc10
543	A230083G16Rik
544	Chd4
545	Kcna5
546	Tspan9
547	Nrip2
548	Cdkn1b
549	Gm44275
550	Wbp11
551	BC049715
552	Rergl
553	Pde3a
554	Sox5
555	Lrmp
556	Gm15704
557	Fgfr1op2
558	Mrps35
559	Far2
560	Ergic2
561	Gm26540
562	Bicd1
563	Gm15494
564	Ppp1r12c
565	Syt5
566	Ube2m
567	Napa
568	Gm45509
569	Gm45510
570	Ppp5c
571	Dmwd
572	Eml2
573	Nkpd1
574	Gsk3a
575	Egln2
576	Gm15567
577	Plekhg2
578	Lgals7
579	Actn4
580	2200002D01Rik
581	Ppp1r14a
582	Rbm42
583	Hamp
584	Usf2
585	Lsr
586	Wtip
587	Uba2
588	Gpi1
589	Lsm14a
590	Rgs9bp
591	Siglecg
592	Nr1h2
593	Ap2a1
594	Hrc
595	Csrp3
596	Ube3a
597	Apba2
598	Synm
599	Igf1r
600	Nr2f2
601	Acan
602	Hapln3
603	Abhd2
604	6330403N20Rik
605	Unc45a
606	Furin
607	Crtc3
608	Alpk3
609	Fam103a1
610	Tm6sf1
611	Zfand6
612	Prss23
613	Prss23os
614	Ankrd42
615	Tenm4
616	Ndufc2
617	Thrsp
618	Rsf1
619	Rsf1os2
620	Myo7a
621	Lrrc32
622	Map6
623	Neu3
624	Kcne3
625	P4ha3
626	Fchsd2
627	Gm45620
628	Stim1
629	Trim68
630	Olfr558
631	Olfr78
632	Olfr633
633	Trim12a
634	Cavin3
635	Apbb1
636	Mrpl17
637	Ppfibp2
638	Dennd5a
639	Swap70
640	Mical2
641	Btbd10
642	Psma1
643	Sox6
644	Sox6os
645	1110004F10Rik
646	Knop1
647	Gm45792
648	Tmem159
649	Uqcrc2
650	Mosmo
651	Eef2k
652	Rbbp6
653	Eif3c
654	Bola2
655	Gdpd3
656	Aldoa
657	Maz
658	Zfp771
659	Bckdk
660	Ate1
661	Gm44623
662	Gm15677
663	Mki67
664	Inpp5a
665	Fuom
666	Echs1
667	Cend1
668	Pidd1
669	Pnpla2
670	Mob2
671	Syt8
672	Nap1l4
673	Tnfrsf22
674	Ccnd1
675	Mrgprf
676	Ppp1r14c
677	Iyd
678	Akap12
679	Syne1
680	Sf3b5
681	Nmbr
682	Perp
683	Gm48249
684	4933406P04Rik
685	E030030I06Rik
686	Vnn3
687	Stx7
688	Gm48215
689	Hey2
690	Gm48045
691	Trappc3l
692	A930033M14Rik
693	Mical1
694	1700021F05Rik
695	Gm35154
696	Slc35f1
697	Pln
698	Fam184a
699	Lims1
700	Sept10
701	Anapc16
702	Eif4ebp2
703	Col13a1
704	Ctnna3
705	Ank3
706	Fam13c
707	4930533K18Rik
708	Cisd1
709	Susd2
710	Cabin1
711	Chchd10
712	Sumo3
713	Pfkl
714	D10Jhu81e
715	Gm47015
716	Hcn2
717	Tmem259
718	Cnn2
719	Stk11
720	Mbd3
721	Csnk1g2
722	Timm13
723	Map2k2
724	Zbtb7a
725	Dapk3
726	Hmg20b
727	Mybpc1
728	Cfap54
729	Ntn4
730	Ube2n
731	Eea1
732	Atp2b1
733	Ccdc59
734	Myrfl
735	Gm32552
736	Llph
737	Rassf3
738	Tmem5
739	Arhgef25
740	R3hdm2
741	Gm47438
742	Gm26847
743	Apon
744	Cs
745	Esyt1
746	Erbb3
747	Gdf11
748	Itga7
749	Olfr814
750	Stxbp2
751	Gm45231
752	4932443L11Rik
753	Timm44
754	Gm31135
755	Gm45076
756	A630009H07Rik
757	Arhgef7
758	Kbtbd11
759	Csmd1
760	Agpat5
761	Tcim
762	Fgfr1
763	Hook3
764	Eif4ebp1
765	Dlc1
766	Slc7a2
767	Pcm1
768	Fat1
769	AY512931
770	Sorbs2
771	Pdlim3
772	Irf2
773	Enpp6
774	E030037K01Rik
775	Hand2
776	Aadat
777	Hpf1
778	Palld
779	Npy1r
780	Upf1
781	Isyna1
782	Ssbp4
783	Lsm4
784	Nr2f6
785	Dda1
786	Tmem221
787	Fam32a
788	Sin3b
789	Smarca5
790	Inpp4b
791	Adgrl1
792	Prkaca
793	Gm5741
794	4921524J17Rik
795	Dnaja2
796	Neto2
797	Nkd1
798	Nod2
799	Tox3
800	Aktip
801	Arl2bp
802	Polr2c
803	Ccdc113
804	Cdh5
805	K230015D01Rik
806	Gm33023
807	4931428F04Rik
808	Ctcf
809	Nrn1l
810	Chtf8
811	Mtss1l
812	Gm45833
813	Rnf166
814	Mc1r
815	Acta1
816	2310022B05Rik
817	Gm45709
818	Egln1
819	Tsnax
820	Sipa1l2
821	Kcnk1
822	2610042L04Rik
823	Pdhb
824	Fam149b
825	Camk2g
826	Gm30108
827	Dupd1
828	Gm2670
829	Prkcd
830	Mustn1
831	Tnnc1
832	Gdf10
833	Sncg
834	Bmpr1a
835	Ldb3
836	Wapl
837	Ccser2
838	Ghitm
839	Ptger2
840	Ktn1
841	Parp2
842	Rnase10
843	Trac
844	Pabpn1
845	Pck2
846	A730061H03Rik
847	Kcnrg
848	Defb42
849	Gata4
850	Ppp2r2a
851	Gm41192
852	AC151836.1
853	Sucla2
854	Sugt1
855	Mzt1
856	Ndfip2
857	Farp1
858	Stk24
859	Gpr183
860	4930594M22Rik
861	Casp12
862	Mmp12
863	Tmem123
864	Trpc6
865	Ccdc82
866	Cwc15
867	Fat3
868	Naalad2
869	Zfp558
870	Olfr39
871	Olfr873
872	Mrpl4
873	Zglp1
874	Dnm2
875	Epor
876	Ccdc151
877	Tbx20
878	E130101E03Rik
879	Herpud2
880	Gm48362
881	Jam3
882	Esam
883	Vsig2
884	Usp2
885	Gm10687
886	Ddx6
887	Gm31614
888	Dlat
889	Acat1
890	Idh3a
891	Peak1os
892	Commd4
893	Rpp25
894	Cox5a
895	Csk
896	Adpgk
897	Smad6
898	Map2k1
899	Rbpms2
900	Snx1
901	Gm28731
902	Gtf2a2
903	Sltm
904	Mindy2
905	Polr2m
906	Myzap
907	Bmp5
908	Gm34829
909	Fbxo9
910	4930429F24Rik
911	Hmgn3
912	Ttk
913	Gm36278
914	Gm10634
915	U2surp
916	Clstn2
917	Foxl2
918	1300017J02Rik
919	4930500F10Rik
920	Gm37850
921	Dag1
922	Klhdc8b
923	4833445I07Rik
924	Dalrd3
925	Prkar2a
926	Uqcrc1
927	Gm7628
928	Plxnb1
929	Camp
930	Map4
931	Ngp
932	Pth1r
933	Tmie
934	Als2cl
935	Lrrc2
936	Lrrfip2
937	Pdcd6ip
938	Eomes
939	Cx3cr1
940	Eif1b
941	Gm47136
942	Limd1
943	Sacm1l
944	Gm11032
945	Pgam2
946	A730071L15Rik
947	Ogdh
948	Purb
949	Ikzf1
950	Gm12002
951	Lgalsl
952	B3gnt2
953	Bod1
954	Hba-a2
955	Kcnip1
956	Kcnmb1
957	Mat2b
958	Ublcp1
959	Gm12166
960	Hnrnpab
961	Ppp2ca
962	Tcf7
963	Vdac1
964	Il5
965	Cdc42se2
966	G3bp1
967	Cops3
968	Myo15
969	Kcnj12
970	Epn2
971	Dnah9
972	Cfap52
973	Atp1b2
974	Fxr2
975	Tnfsf13
976	Ybx2
977	Slc2a4
978	Chrne
979	Slc25a11
980	Kif1c
981	C1qbp
982	Dph1
983	Rtn4rl1
984	Rpa1
985	Smyd4
986	Pitpna
987	Myo1c
988	Nxn
989	Abr
990	Tmigd1
991	Blmh
992	Slc6a4
993	Nsrp1
994	Flot2
995	Psmd11
996	Myo1d
997	Cct6b
998	Rasl10b
999	Appbp2os
1000	Tbx2
1001	Ypel2
1002	Dynll2
1003	Vezf1
1004	Luc7l3
1005	Ankrd40
1006	Gm11521
1007	Ngfr
1008	Phospho1
1009	Gm11536
1010	Cbx1
1011	Gm11592
1012	Fbxo47
1013	Pnmt
1014	Zpbp2
1015	Jup
1016	Ezh1
1017	Coa3
1018	Becn1
1019	Aoc3
1020	Ptges3l
1021	Ifi35
1022	Rnd2
1023	Gm20659
1024	Hdac5
1025	Gm11627
1026	Gjc1
1027	Higd1b
1028	Limd2
1029	Psmd12
1030	Prkar1a
1031	Fam20a
1032	Kcnj2
1033	Fam104a
1034	Gprc5c
1035	Rab37
1036	Mif4gd
1037	Grb2
1038	Llgl2
1039	Smim5
1040	Smim6
1041	Ubald2
1042	Qrich2
1043	Gm11730
1044	Gm11734
1045	Cbx2
1046	Gm26508
1047	Gm11789
1048	Gcgr
1049	Cenpx
1050	Slc16a3
1051	Gm28192
1052	Wdr45b
1053	Net1
1054	Gm47904
1055	Pfkp
1056	Zmynd11
1057	B3galnt2
1058	Hecw1
1059	Yae1d1
1060	Olfr1369-ps1
1061	Zscan26
1062	Hist1h2an
1063	Hist1h2bp
1064	Gm11335
1065	Hist1h3e
1066	Hist1h3a
1067	Dcdc2a
1068	Uqcrfs1
1069	Serpinb1a
1070	Serpinb9
1071	Pxdc1
1072	Tfap2a
1073	Gcnt2
1074	Mcur1
1075	Gm20751
1076	Gmpr
1077	Rbm24
1078	Cap2
1079	Fam8a1
1080	Gm48250
1081	Wnk2
1082	Card19
1083	Fgd3
1084	Bicd2
1085	Aspn
1086	Spin1
1087	Nxnl2
1088	Gm32834
1089	S1pr3
1090	Sfxn1
1091	Hrh2
1092	Gm48623
1093	Tspan17
1094	Uimc1
1095	Rab24
1096	Zfp367
1097	Gm17039
1098	1700001L19Rik
1099	Gm26819
1100	Brd9
1101	Exoc3
1102	Sdha
1103	Adgrv1
1104	Ssbp2
1105	Zcchc9
1106	Thbs4
1107	Homer1
1108	Gm32089
1109	Ankdd1b
1110	Gcnt4
1111	Fcho2
1112	Mrps36
1113	Mast4
1114	Srek1ip1
1115	Rgs7bp
1116	Smim15
1117	Plpp1
1118	Snx18
1119	Itga1
1120	Paip1
1121	Gm41077
1122	Dnmt3aos
1123	Pomc
1124	Ubxn2a
1125	Klhl29
1126	Ntsr2
1127	Cys1
1128	Alkal2
1129	Dld
1130	Dgkb
1131	Gm48715
1132	Arl4aos
1133	Gm47096
1134	Pnpla8
1135	Strn3
1136	Gm35188
1137	Eapp
1138	Trappc6b
1139	Pnn
1140	Trim9
1141	Gm46355
1142	Hif1a
1143	Rhoj
1144	Plekhg3
1145	Sptb
1146	Synj2bp
1147	Gm48242
1148	Rgs6
1149	Gm26571
1150	Isca2
1151	Pgf
1152	Batf
1153	Tgfb3
1154	Ift43
1155	Tmem63c
1156	Ngb
1157	Slirp
1158	Snw1
1159	Zc3h14
1160	Ppp4r3a
1161	Itpk1
1162	Btbd7
1163	Ddx24
1164	Ifi27
1165	Eml1
1166	Yy1
1167	Ckb
1168	Akt1
1169	Crip1
1170	Ighg2c
1171	Ighg2b
1172	Rapgef5
1173	Tmem196
1174	Egflam
1175	Nipbl
1176	Prlr
1177	Agxt2
1178	Dnajc21
1179	Zfr
1180	March11
1181	Ankrd33b
1182	Cmbl
1183	Sdc2
1184	Fbxo43
1185	Ywhaz
1186	Ubr5
1187	Gm35167
1188	Atp6v1c1
1189	Gm48946
1190	Asap1
1191	Phf20l1
1192	Tg
1193	Wisp1
1194	Ndrg1
1195	Khdrbs3
1196	Slc45a4
1197	Gpr20
1198	Ptp4a3
1199	Gm6569
1200	Slurp2
1201	D730001G18Rik
1202	Rhpn1
1203	AC116487.2
1204	Plec
1205	Cyc1
1206	Cyhr1
1207	1110038F14Rik
1208	Txn2
1209	Baiap2l2
1210	Tomm22
1211	Cbx6
1212	Mgat3
1213	Tnrc6b
1214	AC102103.1
1215	Aco2
1216	Pacsin2
1217	Brd1
1218	Abcd2
1219	Smgc
1220	Yaf2
1221	Scaf11
1222	Endou
1223	Ccdc184
1224	Olfr279
1225	Adcy6
1226	Troap
1227	Kcnh3
1228	Mcrs1
1229	Prpf40b
1230	Gm17058
1231	Gm21917
1232	Mettl7a2
1233	Smagp
1234	Krt1
1235	Tns2
1236	Amhr2
1237	Calcoco1
1238	Ppp1r1a
1239	Adcy9
1240	Pam16
1241	Pdxdc1
1242	Ube2v2
1243	Ccdc116
1244	Ube2l3
1245	Zdhhc8
1246	Rtl10
1247	Cldn5
1248	Klhl24
1249	Psmd2
1250	Gm26744
1251	Liph
1252	Dgkg
1253	Pak2
1254	Nrros
1255	Kalrn
1256	Igsf11
1257	Phldb2
1258	Bbx
1259	Cblb
1260	Filip1l
1261	Col8a1
1262	Gm17518
1263	Mrps6
1264	Slc5a3
1265	AC168220.3
1266	Pde10a
1267	Slc22a3
1268	Igf2r
1269	Mas1
1270	Mrgprh
1271	Mrpl18
1272	Tcp1
1273	Sod2
1274	Tcp10b
1275	Gm16049
1276	Ppp2r1a
1277	Cldn6
1278	Noxo1
1279	Cacna1h
1280	Neurl1b
1281	Phf1
1282	Zbtb9
1283	Lemd2
1284	Nudt3
1285	Srpk1
1286	Cpne5
1287	Slc37a1
1288	Notch3
1289	Ephx3
1290	Brd4
1291	Olfr63
1292	Rnf5
1293	Gm20463
1294	Gm11131
1295	Ddr1
1296	Rpp21
1297	Trim10
1298	Olfr107
1299	Adgrf5
1300	Rcan2
1301	Clic5
1302	Mrps18a
1303	Srf
1304	Pex6
1305	Gnmt
1306	Daam2
1307	Sgo1
1308	Fsd1
1309	Ubxn6
1310	Hdgfl2
1311	Safb
1312	Prr22
1313	Pja2
1314	Ndufv2
1315	Ndc80
1316	Lbh
1317	Ehd3
1318	Gm26749
1319	Crim1
1320	Fez2
1321	Cdc42ep3
1322	Epas1
1323	Cript
1324	Calm2
1325	Kif5b
1326	Mkx
1327	Wac
1328	Usp14
1329	Riok3
1330	Lama3
1331	Impact
1332	Dtna
1333	Mapre2
1334	Lims2
1335	Hspa9
1336	Prob1
1337	Cystm1
1338	Pcdh1
1339	Rnf14
1340	Fgf1
1341	Trim36
1342	Lvrn
1343	Tnfaip8
1344	Gm4221
1345	Dctn4
1346	Ppargc1b
1347	Apcdd1
1348	Nars
1349	Mbd2
1350	BC031181
1351	Gm10532
1352	Zbtb7c
1353	Gm16286
1354	Mbp
1355	Gstp1
1356	Cdk2ap2
1357	Pold4
1358	Sf3b2
1359	4930481A15Rik
1360	Ccdc85b
1361	Ehbp1l1
1362	Slc25a45
1363	Dpf2
1364	Ehd1
1365	Sf1
1366	Rasgrp2
1367	Rps6ka4
1368	Vegfb
1369	Pla2g16
1370	Fads3
1371	Lrrc10b
1372	Cyb561a3
1373	Ms4a8a
1374	Olfr1423
1375	Zfp91
1376	C730002L08Rik
1377	Tmem252
1378	Atad1
1379	Fas
1380	Ch25h
1381	Gm26902
1382	Pcgf5
1383	Plce1
1384	Sorbs1
1385	Entpd1
1386	4933411K16Rik
1387	Avpi1
1388	Lzts2
1389	As3mt
1390	Mxi1
1391	Smndc1
1392	Gucy2g
1393	Adrb1
1394	Ccdc186
1395	Afap1l2
1396	Rab11fip2
1397	Eif3a

## Sheet: CoGAP_PatternMarkers5
	Pattern_5
1	Lypla1
2	Atp6v1h
3	Ube2w
4	Tmem70
5	Rab23
6	Actr1b
7	Cavin2
8	Nop58
9	Mettl21a
10	Idh1
11	Rpe
12	Mreg
13	Gmppa
14	Farsb
15	Pde6d
16	Eif4e2
17	3110079O15Rik
18	Ube2f
19	Ilkap
20	Gpc1
21	Dtymk
22	Kdsr
23	Vps4b
24	Ralb
25	Dars
26	Optc
27	Tmem183a
28	Adipor1
29	B3galt2
30	Glrx2
31	Pla2g4a
32	Cacna1e
33	Creg1
34	Rgs5
35	Ccdc190
36	Usf1
37	Copa
38	Pex19
39	Acbd3
40	Eprs
41	Angel2
42	Nmt2
43	Mindy3
44	C1ql3
45	Otud1
46	Ssna1
47	Fbxw5
48	Tmem141
49	Tmem250-ps
50	Dnlz
51	Surf2
52	Surf4
53	Sh3glb2
54	Ptpa
55	1110008P14Rik
56	Ak1
57	Angptl2
58	Rbm18
59	Arpc5l
60	Ppp6c
61	Orc4
62	Tank
63	Psmd14
64	Gorasp2
65	Ola1
66	Rbm45
67	Plekha3
68	Dnajc10
69	Tmx2
70	Mtch2
71	Hsd17b12
72	Fjx1
73	Pamr1
74	Apip
75	Cat
76	Fbxo3
77	Mpped2
78	Lin7c
79	Snap23
80	Hypk
81	Mfap1b
82	Cops2
83	Prnp
84	Crls1
85	Snx5
86	Rbbp9
87	Smim26
88	Xrn2
89	Rbck1
90	6430550D23Rik
91	1110008F13Rik
92	Manbal
93	Srsf6
94	Wisp2
95	Tomm34
96	Zfp335os
97	Tmem189
98	Dpm1
99	Pfdn4
100	Rtf2
101	Prelid3b
102	Lsm14b
103	Adrm1
104	Gid8
105	Ppdpf
106	Samd10
107	Timm17b
108	Tspan7
109	Pgrmc1
110	Ube2a
111	Mcts1
112	C1galt1c1
113	Thoc2
114	Aifm1
115	Rtl8a
116	Rtl8b
117	Htatsf1
118	Hmgb3
119	Vma21
120	Fam3a
121	Armcx1
122	Armcx3
123	Tceal6
124	Tceal9
125	Bex3
126	Morf4l2
127	Nxt2
128	Tmem29
129	Mageh1
130	Nbdy
131	Acot9
132	Ppef1
133	Syap1
134	Ap1s2
135	Trappc2
136	Rab9
137	Prps2
138	Msl3
139	Mrps28
140	Tpd52
141	Impa1
142	Armc1
143	Ufm1
144	Alg5
145	Pfn2
146	Ppid
147	Hdgf
148	Nes
149	Rit1
150	Fdps
151	Scamp3
152	Fam189b
153	Efna4
154	Gm15417
155	4933434E20Rik
156	Ints3
157	Npr1
158	Ilf2
159	Snapin
160	Chtop
161	Ensa
162	Anp32e
163	Sf3b4
164	Bola1
165	Polr3gl
166	Pias3
167	Rnf115
168	Sec22b
169	Hmgcs2
170	Cept1
171	Kcnc4
172	Gstm7
173	Sars
174	Tmem167b
175	Gpsm2
176	Stxbp3
177	Mfsd14a
178	Alg14
179	Gclm
180	Sec24d
181	Egf
182	Papss1
183	Ppa2
184	Cxxc4
185	Cisd2
186	Lamtor3
187	Tspan5
188	Gtf2b
189	Gm30382
190	Chchd7
191	Rad54b
192	Otud6b
193	Cpne3
194	Wwp1
195	Ccnc
196	Ndufaf4
197	Ufl1
198	Ube2j1
199	Slc35a1
200	Smim27
201	Dctn3
202	Dnajb5
203	Stoml2
204	Creb3
205	Rad23b
206	Dnajc25
207	Tle1
208	Rraga
209	Hacd4
210	0610037L13Rik
211	Cmpk1
212	Efcab14
213	Gpbp1l1
214	Rnf220
215	Eri3
216	Slc2a1
217	Ctps
218	Zmpste24
219	Ppie
220	Pabpc4
221	Akirin1
222	Rragc
223	Yars
224	Gm26722
225	Zbtb8os
226	Fabp3
227	Zcchc17
228	Pum1
229	Ythdf2
230	Cnksr1
231	Pnrc2
232	Hmgcl
233	Tcea3
234	Emc1
235	Fam131c
236	Hspb7
237	Srm
238	Spsb1
239	Vamp3
240	Nadk
241	Ssu72
242	Mrpl20
243	Ube2j2
244	Sema3d
245	Gm21149
246	Sema3c
247	Tmem60
248	Lrrc17
249	Fastk
250	Galnt11
251	Mapre3
252	Nrbp1
253	Fam53a
254	Htra3
255	Wfs1
256	Rab28
257	Ldb2
258	Med28
259	Anapc4
260	Fam114a1
261	Lias
262	Tmem33
263	Slc30a9
264	Commd8
265	Tmem165
266	Btc
267	Rchy1
268	G3bp2
269	Anxa3
270	Sec31a
271	Mn1
272	Gltp
273	2210016L21Rik
274	Sppl3
275	Hspb8
276	Denr
277	Cdk2ap1
278	Aacs
279	Mmp17
280	Tpst1
281	Sbds
282	Stx1a
283	Mlxipl
284	Bcl7b
285	Por
286	Znhit1
287	Ppp1r35
288	Lamtor4
289	Sun1
290	Get4
291	Chst12
292	Rnf6
293	Gtf3a
294	Ubl3
295	Bet1
296	Tmem168
297	Tes
298	Snd1
299	Mkln1
300	Cnot4
301	Mtpn
302	Ssbp1
303	Osbpl3
304	Skap2
305	Hotairm1
306	Hoxa3
307	Hibadh
308	Creb5
309	Gars
310	Aqp1
311	Lsm5
312	Grid2
313	Mrpl35
314	St3gal5
315	Rnf181
316	Eva1a
317	Pole4
318	Dok1
319	Loxl3
320	Ino80b
321	Mthfd2
322	Bola3
323	Copg1
324	Podxl2
325	Tmem43
326	Lsm3
327	Suclg2
328	Arl8b
329	Edem1
330	Jagn1
331	Il17rc
332	Creld1
333	Irak2
334	Sec13
335	Csgalnact2
336	Tuba8
337	Mfap5
338	Pex5
339	Emg1
340	Strap
341	Golt1b
342	Abcc9
343	Cmas
344	Med21
345	Tmem238
346	U2af2
347	Trim28
348	Vasp
349	Trappc6a
350	Ppp1r37
351	Ethe1
352	Exosc5
353	Mia
354	Fbl
355	Samd4b
356	Fbxo27
357	Psmd8
358	Zfp260
359	Aplp1
360	Gm12781
361	Gpatch1
362	Vstm2b
363	Josd2
364	Akt1s1
365	Med25
366	Tsg101
367	Svip
368	Nsmce3
369	Tm2d3
370	Fam174b
371	Fanci
372	Ctsc
373	Ccdc90b
374	Clns1a
375	Mrpl48
376	Lamtor1
377	Olfr648
378	Smpd1
379	Timm10b
380	Tpp1
381	Far1
382	Copb1
383	Gde1
384	Dctn5
385	Ppp4c
386	Cdipt
387	Orai3
388	Tial1
389	Plekha1
390	Bccip
391	Bnip3
392	Zfp511
393	Bet1l
394	Psmd13
395	Polr2l
396	Pcmt1
397	Aig1
398	Rnf146
399	Tspyl1
400	Hdac2
401	Slc16a10
402	Gtf3c6
403	Cd164
404	Gm9803
405	Vgll2
406	Ppa1
407	Ddx50
408	Hnrnph3
409	Ccdc6
410	Gucd1
411	Upb1
412	Ddt
413	Gstt2
414	Ube2g2
415	Tpgs1
416	Rnf126
417	Fstl3
418	Plekhj1
419	Sf3a2
420	Mrpl54
421	Ckap4
422	Tmem263
423	Tmcc3
424	Gm29685
425	Glipr1
426	Cnot2
427	Yeats4
428	Wif1
429	Tsfm
430	Mettl1
431	Rbms2
432	Coq10a
433	Nabp2
434	Rab5b
435	Pet100
436	Tfdp1
437	Vps36
438	Smim19
439	Golga7
440	Adam9
441	Zfp703
442	Unc5d
443	Gsr
444	Gtf2e2
445	Leprotl1
446	Cnot7
447	Ufsp2
448	Acsl1
449	Msmo1
450	Borcs8
451	Klhl26
452	Pgpep1
453	Rab3a
454	Mpv17l2
455	Ccdc124
456	Babam1
457	Abhd8
458	Mrpl34
459	Mvb12a
460	Colgalt1
461	Large1
462	Lsm6
463	Abce1
464	Zfp330
465	Scoc
466	Rad23a
467	Asna1
468	Vps35
469	Itfg1
470	Siah1a
471	Adcy7
472	Brd7
473	Cpne2
474	Ciapin1
475	Csnk2a2
476	Got2
477	Nae1
478	Atp6v0d1
479	Vps4a
480	Cog8
481	Nqo1
482	Txnl4b
483	St3gal2
484	Gm15684
485	1190005I06Rik
486	Foxf1
487	Foxc2
488	Fbxo31
489	Trappc2l
490	Spg7
491	Chmp1a
492	Rhou
493	2810004N23Rik
494	3830406C13Rik
495	Psmd6
496	Ngly1
497	Ube2e1
498	Mrps16
499	Ppp3cb
500	Ap3m1
501	Comtd1
502	Zcchc24
503	Cacna2d3
504	Glt8d1
505	Dph3
506	Ncoa4
507	Gnpnat1
508	Cnih1
509	Lgals3
510	4930572G02Rik
511	Ttc5
512	1700123O20Rik
513	Ngdn
514	Gmpr2
515	Dhrs1
516	Eef1akmt1
517	Mrpl57
518	Mtmr6
519	Fdft1
520	Msra
521	Nudt18
522	Rcbtb2
523	4930431P22Rik
524	Wbp4
525	Elf1
526	Msantd4
527	Dcun1d5
528	Mtmr2
529	Smco4
530	Pin1
531	Keap1
532	Pigyl
533	Igsf9b
534	Kirrel3os
535	Dcps
536	Hyou1
537	Arcn1
538	Rexo2
539	Rbm7
540	Pts
541	Cul5
542	Gldn
543	Wdr61
544	Ube2q2
545	Fbxo22
546	Fam219b
547	Pias1
548	Rab11a
549	Rora
550	Fam81a
551	Rsl24d1
552	Me1
553	Cyb5r4
554	Ctsh
555	Copb2
556	Srprb
557	Uba5
558	Mrpl3
559	Sema3b
560	Gmppb
561	Tcta
562	Usp4
563	Ndufaf3
564	P4htm
565	Ip6k2
566	Dhx30
567	Ccdc12
568	Stac
569	Crtap
570	Azi2
571	Ss18l2
572	Gm47113
573	1110059G10Rik
574	Exosc7
575	Zmat5
576	Gas2l1
577	Ppp3r1
578	Pno1
579	C1d
580	Rab1a
581	Ugp2
582	Pex13
583	Prorsd1
584	Nudcd2
585	Ttc1
586	Clint1
587	Clk4
588	0610009B22Rik
589	Sar1b
590	Hspa4
591	Kif3a
592	Pdlim4
593	P4ha2
594	Fam114a2
595	Olfr224
596	Mrpl55
597	Gid4
598	Flii
599	Map2k3
600	Mfap4
601	Ccdc42
602	Ndel1
603	Vamp2
604	Trappc1
605	Naa38
606	Trp53
607	Elp5
608	Rnf167
609	Ube2g1
610	Emc6
611	Tmem199
612	Brip1
613	Rnft1
614	Vmp1
615	Srsf1
616	Mmd
617	Nme2
618	Lrrc59
619	Slc35b1
620	Hoxb3os
621	Hoxb2
622	Ormdl3
623	Nr1d1
624	Stat5a
625	G6pc3
626	Ubtf
627	Nmt1
628	Acbd4
629	Arf2
630	Cyb561
631	Wipi1
632	Slc9a3r1
633	Mrpl58
634	Wbp2
635	Ten1
636	Mettl23
637	Sept9
638	Syngr2
639	Cant1
640	Gps1
641	Ogfod3
642	Idi1
643	Gtpbp4
644	Lgals8
645	Stard3nl
646	Hist1h2bc
647	Acot13
648	Gmds
649	Serpinb6b
650	Dsp
651	Snrnp48
652	Pak1ip1
653	Tmem14c
654	Edn1
655	Fam120a
656	Auh
657	Cltb
658	Dbn1
659	Txndc15
660	H2afy
661	Gkap1
662	2210016F16Rik
663	Gas1
664	Mterf3
665	Mrpl36
666	Ccdc127
667	Arrdc3
668	Lysmd3
669	Ccnh
670	Vcan
671	Ankra2
672	Trappc13
673	Elovl7
674	Gpbp1
675	Mocs2
676	Hmgcs1
677	Rab10
678	Sf3b6
679	Osr1
680	Rdh14
681	Ddx1
682	Fam84a
683	Odc1
684	Hpcal1
685	Gm10330
686	Tmem18
687	Acp1
688	Bcap29
689	Twistnb
690	Ankmy2
691	Arl4a
692	Ap4s1
693	Dtd2
694	Psma6
695	Sec23a
696	Klhdc2
697	Nemf
698	Arf6
699	Tmx1
700	Ppp2r5e
701	Gm47689
702	Mthfd1
703	Churc1
704	Atp6v1d
705	Eif2s1
706	Tmem229b
707	Vti1b
708	Gm36660
709	Galnt16
710	Erh
711	Acyp1
712	Gm26531
713	Psmc1
714	Asb2
715	Papola
716	Apopt1
717	Zfyve21
718	Gm11027
719	Macc1
720	Fbxo4
721	Brix1
722	Golph3
723	Laptm4b
724	Ankrd46
725	Azin1
726	Emc2
727	Eny2
728	Mrpl13
729	Nsmce2
730	Chrac1
731	Ccdc166
732	Gpaa1
733	Kctd17
734	C1qtnf6
735	Slc16a8
736	Tmem184b
737	Kdelr3
738	Slc25a17
739	Phf5a
740	Poldip3
741	Ttll1
742	Twf1
743	Ano6
744	Pfkm
745	Cacnb3
746	Arf3
747	Prkag1
748	Cox14
749	Galnt6
750	Spryd3
751	Csad
752	Prr13
753	Copz1
754	Glyr1
755	4930509G22Rik
756	Rsl1d1
757	Gspt1
758	AC154509.1
759	Rrn3
760	Fopnl
761	Mapk1
762	4933432I09Rik
763	Tbx1
764	Ufd1
765	B630019A10Rik
766	Ncbp2
767	Fyttd1
768	Fam162a
769	Timmdc1
770	Atp6v1a
771	Naa50
772	Atg3
773	Tfg
774	Cpox
775	4930453N24Rik
776	N6amt1
777	Cct8
778	Map3k7cl
779	Eva1c
780	1110004E09Rik
781	Cryzl1
782	Kcnj15
783	Wrb
784	Tnfrsf12a
785	Flywch1
786	Rnps1
787	Pgp
788	Traf7
789	BC003965
790	Luc7l
791	Ergic1
792	Cuta
793	Taf11
794	Ppil1
795	BC004004
796	Zfand3
797	Actl9
798	H2-Ke6
799	Ppt2
800	Atf6b
801	Lsm2
802	Csnk2b
803	Bag6
804	Ppp1r18
805	Abcf1
806	Yipf3
807	Mrpl2
808	Mea1
809	Cnpy3
810	Rpl7l1
811	Ccnd3
812	Oard1
813	Rab5a
814	Mpnd
815	Khsrp
816	Slc25a23
817	Dlgap1
818	Clip4
819	Ypel5
820	Dpy30
821	Cebpz
822	Zeb1
823	Snrpd1
824	Ss18
825	Polr2d
826	Bin1
827	Srp19
828	Cdc23
829	Etf1
830	Dnajc18
831	Cxxc5
832	Sra1
833	Ik
834	Yipf5
835	2900055J20Rik
836	Eif3j2
837	Snx24
838	Prdm6
839	Rbm22
840	Synpo
841	Pcyox1l
842	Napg
843	Fech
844	Sec11c
845	Psmg2
846	Mex3c
847	Smad4
848	Cxxc1
849	Ndufs8
850	Gal3st3
851	Banf1
852	Sssca1
853	Scyl1
854	Zfpl1
855	Arl2
856	Bad
857	Stip1
858	Macrod1
859	Otub1
860	Nxf1
861	Taf6l
862	Ddb1
863	Rfk
864	Ostf1
865	Pip5k1b
866	Smarca2
867	Plgrkt
868	Ric1
869	Pten
870	March5
871	Slc35g1
872	Gm27042
873	Zfyve27
874	Xpnpep1
875	Bbip1
876	Fam204a
877	Prdx3
878	AC168977.1

## Sheet: Pattern4_EnrichR
Table of top 10 significant p-values and q-values for ENCODE and ChEA Consensus TFs from ChIP-X
term	p-value	q-value	overlap_genes
GATA2 CHEA	5.5e-05	0.005728	[DDR1, PNMT, ISCA2, TNFAIP8, WDR1, TENM4, KDM1A, FHL2, KIF14, IKZF1, RCSD1, IGF1R, CCT6B, FAM110A, CDH5, STK11, IYD, EFHD2, HMG20B, PIP4K2A, LRRFIP2, TGM2, SOX5, BRD3, ACOT7, TRPC3, SCAF11, CCDC113, UBALD2, VPS37B, ACTN4, STIM1, SYF2, TAL1, CTDSP1, MAPKAPK2, TMEM106B, B3GNT2, FAM32A, RAPGEF5, RPP25, DLD, MAPRE2, STK40, MGLL, CAB39, CTTNBP2, ABHD2, ITPR1, GMPR, FURIN, CRIP1, ART3, DNAJB2, HLX, MXI…
UBTF ENCODE	0.000253	0.013148	[CRTC3, UBXN2A, UBE3A, CBLB, MKI67, NUDT3, IGF1R, YY1, RPS6KA4, RASSF3, DAG1, BBX, PIP4K2A, KPNA4, KCNH2, MAP2K1, SCAF11, LEMD2, CLIP1, ADCY9, MAPKAPK2, ANKRD40, VDAC1, RAF1, EIF1B, LLGL2, NOTCH2, DDX6, TXNDC9, ARHGEF25, CUL3, MAZ, CUL1, ITPR1, DCUN1D1, RASAL2, TOR1AIP1, CORO1C, TMEM123, HIST1H3A, PRKAR2A, DNAJC21, PACSIN2, EIF4EBP2, CAMTA1, MAP4, RAB11FIP2, ZBTB7A, PPARGC1B, ZC3H15, NDFIP2, CBX6…
GATA1 CHEA	0.000606	0.020993	[PNMT, TNFAIP8, ANKRD33B, CD82, AMHR2, TENM4, ZFAND6, PRKAG2, IKZF1, NUDT3, IGF1R, LIMD2, FAM110A, STK11, LBH, TLK1, SMIM12, RGS6, TGM2, KCNH2, CAP1, PLEKHG3, SPTB, YWHAZ, STIM1, SYF2, MAPKAPK2, EHBP1L1, PLEKHO1, FAR2, RAPGEF5, RPP25, NOTCH2, NOTCH1, KCNE3, PPM1L, EPB41, ABHD2, ITPR1, GMPR, FURIN, ASAP1, TSPAN33, CRIP1, TMEM123, RAP1A, INPP5A, DNAJB6, CUX1, HRH2, UBR5, GNA12, EIF4EBP1, PACSIN2, C…
STAT3 CHEA	0.002934	0.076295	[GTF2A2, TENM4, PPM1L, ZFR, IKZF1, CROT, KRCC1, LSM4, YWHAZ, U2SURP, EEA1, NACC2, DLC1, CREB3L2, UBR5, CAMTA1, KPNA4, RBBP6, APBB2, MSX1, SSBP2, SSBP4, JAZF1]
SRF ENCODE	0.01071	0.222759	[MRPS15, WDR1, ADPGK, SRF, NDUFA10, TCF7, ARHGAP1, RASAL2, CNN2, MRPL4, DPH1, GLIPR2, IDH3B, CAP1, ACTR3, PLEKHG2, HOMER1, DAPK3, CCDC59, CDK11B, U2SURP, NR2F6, PDCL3, KLF7, SNX18, DDAH1, MAPKAPK2, RBM42, FAM32A, NDUFS1, RAF1, RNF166]
AR CHEA	0.027859	0.482886	[HERPUD2, DGKG, KDM1A, FAM13C, DGKB, ZFAND6, PITPNB, PRKAG2, CBLB, LIMD1, RND3, IGF1R, FAM107B, AKAP12, RIMS1, EEF2K, TRIM2, HEY2, LRRFIP2, SOX6, TMEM38B, RGS6, MAP2K1, ACOT7, STX7, NPY1R, ANK3, CMBL, EPN2, ELF2, PSMA1, PALLD, CDC42EP3, IRF2, FAR2, PHLDB2, SLC22A3, PPM1L, CTBP1, MRPL18, ABHD2, LAMA3, FAM129A, HSD17B13, ASAP1, ADRB1, RASAL2, KALRN, NDRG1, THBS1, CYTH3, INPP5A, CUX1, HRH2, CHN2, CO…
KLF4 CHEA	0.033804	0.502232	[ANKRD33B, CD82, RNF14, ARHGAP1, CTCF, ENO1, SMG7, LRRC2, AKAP12, PIDD1, EEF2K, CSRP1, ZC3H12A, HEY2, ACADM, LZTS2, ACADS, YWHAG, EOMES, PLEKHG3, PHYH, PLEKHG2, CAMK1D, RFC1, SACM1L, CCDC113, ITPK1, YWHAZ, THRAP3, HAND2, TIPRL, B3GNT2, RELL1, RPP25, EAPP, STK40, CSNK1G2, PLEC, AGPAT5, TXNDC9, NOTCH1, PDXDC1, TMEM63C, DCTN4, STXBP2, PDGFA, RASGRP2, COX5A, CRIP1, NDRG1, CORO1C, HIST1H3A, TSPAN9, FC…
TCF3 CHEA	0.04923	0.63999	[ADPGK, TMEM51, HSPB1, NUCKS1, ENO1, OLFML2A, LRRC2, YY1, BAIAP2L1, EEF2K, RASSF3, CSRP1, SUMO3, SPIN1, DAG1, PRKACB, YWHAG, EOMES, PLEKHG3, WSB2, TCF15, ZFR, ITPK1, COMMD3, UBALD2, ACTN4, ANK3, YWHAZ, EPN2, DDAH1, CDC42EP3, UBE2V2, RELL1, RAPGEF5, RAF1, STK40, ASTN1, CDC42SE1, LAMA5, PEF1, MAPKAP1, PDE1A, PDGFA, PDHB, KRCC1, AKAP2, GJC1, BRINP2, HIST1H3A, DNAJB6, TSPAN9, PRKAR2A, NACC2, MXI1, UB…

## Sheet: Pattern5_EnrichR
Table of top 10 significant p-values and q-values for ENCODE and ChEA Consensus TFs from ChIP-X
term	p-value	q-value	overlap_genes
TAF1 ENCODE	4.36679e-23	4.4978e-21	[TMEM183A, ARPC5L, GDE1, GPATCH1, CCNC, TPGS1, EPRS, TXNDC15, PSMD8, TIAL1, PSMD6, RNF115, TRIM28, SNRPD1, GPBP1, DENR, COG8, TSPYL1, ALG5, ARRDC3, SND1, GTPBP4, ARMC1, RRAGA, POR, MTHFD2, CLNS1A, XRN2, PRR13, MTMR2, STXBP3, DCUN1D5, SAR1B, TWF1, WDR61, LIAS, MRPL13, GSPT1, ZMPSTE24, UBE2J1, PRDX3, MRPL20, GUCD1, SNX5, SEC31A, MTERF3, INTS3, BBIP1, PUM1, TMEM199, NMT1, ANP32E, NDUFAF3, HYOU1, RNP…
YY1 ENCODE	1.98602e-16	1.0228e-14	[GDE1, KEAP1, GPATCH1, TPGS1, TXNDC15, PSMD8, TIAL1, CDC23, SNRPD1, GPBP1, FBXO3, COG8, METTL1, NGDN, ALG5, RRAGA, PPA2, BOLA3, SUCLG2, SKAP2, MTMR2, SAR1B, WDR61, UBE2J2, HTATSF1, PRDX3, MRPL20, GUCD1, ZNHIT1, ERI3, SNX5, NAA50, SURF2, INTS3, BBIP1, PUM1, TMEM199, NMT1, ANP32E, NDUFAF3, CCDC124, ZBTB8OS, SRA1, MRPL36, CSAD, ZCCHC17, MRPL35, BABAM1, PPP3CB, UBL3, AUH, FASTK, ENSA, SSSCA1, MRPS28,…
BRCA1 ENCODE	5.10306e-16	1.75205e-14	[TMEM183A, CCNH, OGFOD3, GDE1, CISD2, CCNC, TXNDC15, COMTD1, TFG, SNRPD1, GPBP1, DENR, ZFPL1, VPS36, SAMD10, TSPYL1, METTL1, NGDN, ALG5, NSMCE2, SCAMP3, RRAGA, POR, MTHFD1, PPA2, MTHFD2, XRN2, CRYZL1, ATP6V0D1, CUTA, MTMR2, STXBP3, DCUN1D5, SAR1B, FLII, LIAS, MRPL13, MTMR6, ZMPSTE24, GUCD1, COMMD8, BRIP1, PPP3R1, SYNGR2, CHST12, DPH3, SNX5, VTI1B, NAA50, MTERF3, NMT1, ANP32E, NDUFAF3, RNPS1, ARF3…
CREB1 ENCODE	8.73715e-16	2.24982e-14	[SRP19, GALNT11, TXNL4B, TMEM183A, CCNH, GTF2B, SLC35B1, SYAP1, LOXL3, GDE1, MPV17L2, MSMO1, YEATS4, EPRS, PSMD8, CDC23, TRIM28, KHSRP, GPBP1, PAPOLA, NUDT18, LUC7L, ZFPL1, SAMD10, ATG3, ACOT9, SLC30A9, METTL1, NGDN, NSMCE2, SSU72, CNPY3, ILF2, GTPBP4, ARMCX3, TMX2, MORF4L2, RPL7L1, ERH, SRSF6, ANKRA2, GLYR1, HIST1H2BC, LRRC59, IDI1, RAB5B, ENY2, TSG101, STXBP3, PPP1R35, TWF1, WDR61, LIN7C, ADIPO…
MAX ENCODE	1.2728e-15	2.62198e-14	[N6AMT1, SRP19, MTCH2, TMEM167B, GOLT1B, ARPC5L, CISD2, EPRS, TIAL1, LAPTM4B, FBL, COMTD1, ZFYVE27, SNRPD1, FAM162A, GPBP1, AP1S2, MACROD1, PAPOLA, LUC7L, BANF1, PLEKHJ1, ATG3, COG8, USP4, METTL1, GTF3A, BOLA1, TOMM34, CNPY3, THOC2, SND1, SCAMP3, GTPBP4, MTHFD1, RRAGC, MTHFD2, PPA1, CLNS1A, MORF4L2, RPL7L1, XRN2, PGP, SRSF6, ATP6V0D1, ANKRA2, PPID, GLYR1, CUTA, ATP6V1A, ENY2, CUL5, DDX1, GSPT1, P…
ELF1 ENCODE	2.83095e-14	4.25523e-13	[SRP19, TXNL4B, TMEM167B, GOLT1B, CCNH, ZFAND3, GTF2B, GDE1, CPOX, GPATCH1, MSANTD4, FAM204A, PSMD8, TIAL1, RGS5, RNF115, ZFYVE27, TFG, SNRPD1, AP1S2, NUDT18, BANF1, DENR, ZFPL1, AZI2, SAMD10, PLEKHJ1, ATG3, COG8, ANGEL2, CSNK2A2, NSMCE2, ALG14, CNPY3, SND1, SCAMP3, GTPBP4, ARMC1, DPM1, TMX2, TMX1, RPL7L1, ORAI3, ANAPC4, ERH, ATP6V0D1, PPID, ARL8B, HIST1H2BC, INO80B, LRRC59, ENY2, COPA, TSG101, P…
MYC ENCODE	2.8919e-14	4.25523e-13	[N6AMT1, TMEM183A, TMEM167B, ARPC5L, EPRS, TIAL1, FBL, COMTD1, SNRPD1, FAM162A, MACROD1, PAPOLA, BANF1, SAMD10, TMEM14C, PLEKHJ1, COG8, USP4, METTL1, GTF3A, TOMM34, CNPY3, SND1, GTPBP4, MTHFD1, MTHFD2, PPA1, CLNS1A, MORF4L2, RPL7L1, XRN2, PGP, SRSF6, ANKRA2, PPID, CUTA, ENY2, DDX1, HTATSF1, LIAS, ZMPSTE24, MRPL20, EMG1, G3BP2, BRIX1, ATP6V1D, NADK, SNX5, SEC31A, YARS, CD164, DARS, CHTOP, MTERF3, …
CREB1 CHEA	5.05794e-14	6.5121e-13	[SRP19, GALNT11, TXNL4B, TMEM183A, CCNH, GTF2B, SLC35B1, MSMO1, EPRS, CCND3, ZFYVE27, KHSRP, GPBP1, PAPOLA, LUC7L, FAM53A, MAP2K3, SLC30A9, METTL1, SSU72, CNPY3, SND1, GTPBP4, DPM1, MORF4L2, XRN2, FAR1, SRSF6, ANKRA2, LRRC59, IDI1, RAB5B, ENY2, TSG101, STXBP3, DCUN1D5, TWF1, WDR61, ADIPOR1, GSPT1, BAG6, STIP1, CYB5R4, EMG1, PPP4C, ERI3, COX14, FDFT1, FDPS, AKIRIN1, ACBD4, INTS3, SS18L2, AZIN1, LS…
NFYB ENCODE	1.78077e-12	2.03799e-11	[GLTP, TES, TMEM183A, CCNH, SLC35B1, GDE1, CISD2, MSANTD4, TPGS1, TIAL1, C1GALT1C1, CDC23, TFG, AP1S2, VPS35, ACOT9, COG8, TSPYL1, NGDN, ARRDC3, ZFYVE21, SND1, SCAMP3, GTPBP4, ARMC1, MTHFD1, RRAGC, MTHFD2, ORAI3, CRYZL1, SUCLG2, FAR1, FLYWCH1, PRR13, CUTA, STXBP3, FLII, LIAS, GUCD1, BRIP1, ERI3, DPH3, RDH14, FDFT1, PNO1, EDEM1, INTS3, SURF4, SS18L2, BBIP1, NR1D1, SMARCA2, MEX3C, NMT1, ANP32E, NDU…
ATF2 ENCODE	5.36846e-12	5.52952e-11	[TMEM183A, CCNH, SLC35B1, CISD2, CCNC, EPRS, PSMD8, TIAL1, ZFYVE27, TRIM28, GPBP1, DENR, COG8, TSPYL1, METTL1, ALG5, ARRDC3, SND1, SCAMP3, ARMC1, RRAGA, POR, PPA2, MTHFD2, CLNS1A, XRN2, ATP6V0D1, ANKRA2, PPP1R37, CUTA, STXBP3, SAR1B, LIAS, MRPL13, ZMPSTE24, MRPL20, PPP3R1, SNX5, SEC31A, NAA50, VASP, PNO1, BBIP1, PUM1, MEX3C, ANP32E, NDUFAF3, RNPS1, ARF3, HIBADH, PAK1IP1, CCDC124, PRKAG1, CLTB, ZB…
