# Supplementary material for: Intrinsic Gata4 expression sensitizes the aortic root to dilation in a Loeys-Dietz syndrome mouse model
Source: Research Square preprint supplement (doi:10.21203/rs.3.rs-4420617/v1), 2024-06-05
Supplement: Supplementary file 17 [file Supplemental_Table 5.xlsx]

## Sheet: SHFposvsSHFneg.WT_VSMCsOnly.dif
Supplemental Table 5.
List of transcripts expressed in mouse SHF-traced VSMCs relative to non SHF-traced VSMCs, re-analyzed from Pedroza et al., Arteriosclerosis, Thrombosis, and Vascular Biology. 2022;42:1154–1168. All detected transcripts are listed.
	p_val	avg_log2FC	pct.1	pct.2	p_val_adj
Tnnt2	0	1.48667	0.594	0.216	0
Dcn	0	1.45123	0.451	0.1	0
Des	0	1.17217	0.384	0.1	0
Lum	5.81586e-236	1.12784	0.258	0.049	1.26524e-231
Apoe	5.97971e-217	1.10074	0.728	0.418	1.30089e-212
mt-Atp6	0	0.743889	0.999	0.996	0
Cxcl12	1.5387e-307	0.727736	0.46	0.14	3.34744e-303
Rgs5	4.58697e-74	0.680942	0.249	0.12	9.97895e-70
Hand2os1	0	0.66237	0.57	0.158	0
Psd	0	0.636121	0.355	0.067	0
mt-Co2	0	0.619306	0.999	0.993	0
mt-Nd1	2.08252e-284	0.590169	0.999	0.98	4.53052e-280
mt-Nd2	3.25865e-250	0.584395	0.997	0.954	7.0892e-246
mt-Co3	8.3759e-241	0.529613	0.999	0.998	1.82218e-236
Mgp	1.25285e-108	0.524452	1	0.998	2.72558e-104
mt-Nd4	1.81566e-225	0.511193	0.999	0.989	3.94997e-221
Hspa1a	1.94447e-101	0.504578	0.648	0.412	4.2302e-97
Col14a1	8.25783e-172	0.502747	0.636	0.34	1.79649e-167
Igfbp4	3.60334e-135	0.494916	0.555	0.308	7.83906e-131
mt-Cytb	3.11142e-192	0.46459	0.999	0.997	6.76889e-188
Cfh	1.46279e-55	0.448627	0.827	0.689	3.18231e-51
mt-Nd5	1.46433e-141	0.444955	0.939	0.712	3.18564e-137
Tm4sf1	4.50526e-126	0.440373	0.992	0.971	9.8012e-122
Pkig	1.86091e-200	0.439733	0.76	0.411	4.04841e-196
Il11ra1	2.81212e-180	0.431537	0.857	0.561	6.11777e-176
Klf2	1.70782e-60	0.431036	0.581	0.396	3.71537e-56
mt-Co1	5.58164e-151	0.424919	0.999	0.997	1.21429e-146
Ecm1	2.52684e-141	0.414105	0.9	0.661	5.49715e-137
Fbln5	1.95717e-109	0.412181	0.966	0.862	4.25782e-105
Cp	2.11954e-160	0.41154	0.282	0.089	4.61107e-156
Jund	1.15178e-113	0.406324	0.974	0.883	2.50569e-109
Junb	3.96502e-53	0.39828	0.711	0.557	8.6259e-49
Cebpd	5.06155e-91	0.396876	0.563	0.335	1.10114e-86
Tmem176b	3.16372e-173	0.391753	0.281	0.082	6.88267e-169
Srsf7	3.20283e-132	0.389844	0.754	0.445	6.96775e-128
Pln	8.86019e-128	0.387844	0.329	0.136	1.92754e-123
Cd81	5.79701e-184	0.385281	0.988	0.879	1.26114e-179
Fbln1	4.29502e-157	0.384008	0.165	0.026	9.34381e-153
Aldh2	1.06448e-164	0.382669	0.934	0.704	2.31577e-160
Gpc3	8.93725e-192	0.373071	0.326	0.099	1.9443e-187
Abi3bp	1.21538e-92	0.369143	0.739	0.49	2.64405e-88
Palld	2.94916e-146	0.363922	0.49	0.23	6.41589e-142
Gm13889	7.4871e-78	0.356762	0.773	0.556	1.62882e-73
Hspb1	1.42861e-23	0.354086	0.979	0.956	3.10794e-19
Cd34	1.92207e-159	0.344299	0.198	0.042	4.18146e-155
Mtus2	3.17529e-121	0.338052	0.812	0.54	6.90784e-117
Ier2	6.28876e-70	0.335851	0.608	0.407	1.36812e-65
Atf5	5.1066e-138	0.333715	0.38	0.159	1.11094e-133
Ubc	2.63087e-95	0.33211	0.971	0.894	5.72346e-91
Id1	4.04599e-80	0.326985	0.732	0.51	8.80204e-76
Serping1	3.54482e-108	0.321991	0.668	0.388	7.71176e-104
Meg3	1.40834e-71	0.319602	0.396	0.224	3.06385e-67
Crip2	6.21158e-110	0.317981	0.919	0.726	1.35133e-105
Rpl3	3.24303e-156	0.316757	0.958	0.889	7.05521e-152
Btg2	2.07573e-51	0.316315	0.758	0.583	4.51575e-47
Pdlim3	3.37725e-83	0.315246	0.862	0.653	7.3472e-79
Hspb7	7.8368e-106	0.314349	0.759	0.485	1.7049e-101
AY036118	1.73213e-61	0.312022	0.778	0.575	3.76825e-57
Arhgdib	1.82639e-152	0.30479	0.236	0.065	3.97331e-148
Serpinf1	1.3411e-110	0.299217	0.146	0.033	2.91756e-106
Itm2b	1.87452e-145	0.299137	0.991	0.917	4.07802e-141
Mpp6	1.29592e-138	0.29712	0.311	0.114	2.81927e-134
Emilin1	1.63256e-147	0.295381	0.492	0.219	3.55164e-143
Bsg	4.05848e-109	0.294744	0.896	0.638	8.82922e-105
Cebpb	2.64311e-53	0.292847	0.8	0.584	5.75008e-49
Ubb	5.4651e-155	0.292661	0.997	0.985	1.18893e-150
Pkdcc	2.30441e-116	0.291963	0.571	0.303	5.01324e-112
Smad7	4.08895e-84	0.291407	0.557	0.33	8.89552e-80
Rsrp1	3.87506e-111	0.288627	0.825	0.537	8.43019e-107
Meis2	1.19427e-129	0.286084	0.562	0.284	2.59814e-125
Crispld2	7.58394e-119	0.283949	0.467	0.228	1.64989e-114
Rplp0	1.20431e-152	0.282919	0.961	0.956	2.61997e-148
Ier5	4.4168e-99	0.282341	0.42	0.212	9.60874e-95
Gapdh	7.4091e-107	0.278257	0.96	0.882	1.61185e-102
Rras	6.93647e-97	0.277228	0.945	0.785	1.50903e-92
Tpt1	2.37545e-226	0.275636	0.994	0.994	5.16779e-222
Mgst1	4.12327e-137	0.273684	0.352	0.139	8.97018e-133
Eef1g	3.46335e-99	0.272461	0.834	0.562	7.53452e-95
Hspa8	1.62431e-80	0.271989	0.992	0.972	3.53368e-76
Htra1	7.66626e-64	0.270347	0.851	0.62	1.66779e-59
Stbd1	1.30419e-102	0.269874	0.581	0.324	2.83726e-98
mt-Nd3	3.8774e-56	0.268367	0.967	0.823	8.43529e-52
Calm3	1.57168e-110	0.264132	0.727	0.424	3.41919e-106
Igfbp7	2.91801e-126	0.262738	1	0.998	6.34813e-122
Cst3	1.49479e-50	0.262507	0.999	0.997	3.25192e-46
Rpl7	1.70986e-141	0.261554	0.971	0.961	3.71981e-137
Hspb6	4.22873e-82	0.261269	0.777	0.527	9.19961e-78
Clmp	2.97598e-120	0.261184	0.435	0.203	6.47425e-116
Tle5	1.98789e-94	0.259443	0.921	0.75	4.32466e-90
Zfp36	5.98528e-39	0.258324	0.615	0.446	1.3021e-34
Ctsd	1.40645e-80	0.255543	0.908	0.68	3.05974e-76
Gm34030	5.13716e-153	0.254355	0.312	0.105	1.11759e-148
Eef2	2.9708e-86	0.252617	0.938	0.774	6.46297e-82
Dact3	1.1133e-96	0.251774	0.704	0.415	2.42198e-92
Tcap	2.31678e-30	0.251639	0.435	0.299	5.04016e-26
Pfkp	1.8572e-119	0.251231	0.526	0.259	4.04033e-115
Eef1a1	6.25072e-186	0.250855	0.996	0.997	1.35984e-181
Cnbp	7.36721e-86	0.250209	0.87	0.63	1.60274e-81
Smoc1	4.16325e-80	0.249718	0.406	0.219	9.05715e-76
Zfp503	6.15227e-146	0.249599	0.279	0.09	1.33843e-141
Rgs17	1.8723e-107	0.246796	0.143	0.032	4.07318e-103
Nfkbia	1.04105e-48	0.24673	0.558	0.365	2.2648e-44
Arpc1b	2.22297e-79	0.246717	0.829	0.574	4.83607e-75
Prss23	1.57784e-66	0.246472	0.691	0.462	3.43258e-62
Pkm	3.73247e-87	0.245824	0.874	0.616	8.12e-83
Islr	2.40238e-94	0.245071	0.683	0.401	5.22637e-90
Dapk2	1.91709e-130	0.245068	0.283	0.1	4.17064e-126
Itgb5	1.51439e-71	0.244615	0.831	0.582	3.29456e-67
Aldoa	5.18723e-80	0.243804	0.922	0.744	1.12848e-75
Fus	4.88776e-65	0.242697	0.743	0.491	1.06333e-60
Ccdc80	7.29859e-68	0.242144	0.651	0.407	1.58781e-63
Mfap4	1.87859e-32	0.240894	0.779	0.65	4.08686e-28
Rap1a	4.28909e-116	0.24076	0.655	0.35	9.33093e-112
Eid1	8.13132e-69	0.239379	0.856	0.645	1.76897e-64
Rack1	2.2644e-97	0.237373	0.952	0.897	4.92621e-93
Cd151	1.71887e-86	0.236008	0.742	0.456	3.73941e-82
Ndrg1	1.03065e-121	0.234933	0.329	0.133	2.24219e-117
Mrfap1	2.15364e-87	0.234651	0.842	0.572	4.68525e-83
Tnfrsf12a	2.93136e-46	0.23279	0.812	0.626	6.37717e-42
Corin	1.86018e-64	0.230524	0.104	0.029	4.04682e-60
Serpinh1	4.34686e-70	0.229389	0.923	0.744	9.4566e-66
Eif4a2	4.8246e-78	0.229341	0.856	0.598	1.04959e-73
Plaat3	1.32546e-154	0.228805	0.311	0.102	2.88353e-150
Rps3	5.19598e-116	0.228213	0.966	0.967	1.13039e-111
Socs3	3.52325e-58	0.227233	0.321	0.18	7.66483e-54
Itgbl1	1.84853e-81	0.225642	0.646	0.393	4.02148e-77
Frzb	3.54783e-101	0.224789	0.163	0.045	7.7183e-97
H3f3a	1.11639e-94	0.222187	0.983	0.938	2.4287e-90
Gnb2	1.6708e-75	0.222039	0.838	0.572	3.63483e-71
Ctsl	1.4338e-58	0.221648	0.887	0.671	3.11924e-54
Ehd4	5.11819e-98	0.220344	0.54	0.29	1.11346e-93
Rcn3	4.78742e-63	0.220253	0.928	0.748	1.0415e-58
Id3	6.68371e-31	0.219809	0.96	0.895	1.45404e-26
Pink1	1.51249e-127	0.218146	0.511	0.237	3.29042e-123
Rasl11a	1.57558e-58	0.216582	0.581	0.372	3.42768e-54
Tuba1a	1.50371e-73	0.216498	0.659	0.41	3.27131e-69
Eif5a	1.01615e-69	0.216425	0.905	0.707	2.21062e-65
Lims1	2.36749e-114	0.21453	0.493	0.238	5.15048e-110
Col4a6	7.99899e-84	0.214374	0.55	0.307	1.74018e-79
Synm	3.92105e-120	0.214341	0.31	0.121	8.53025e-116
Col8a1	1.86885e-98	0.214198	0.154	0.042	4.06569e-94
Myl9	4.35375e-84	0.214111	0.997	0.994	9.47158e-80
Actg1	6.00998e-72	0.214003	0.994	0.966	1.30747e-67
Gucy1a1	6.37327e-36	0.213579	0.919	0.778	1.38651e-31
Clic1	3.36009e-80	0.213321	0.778	0.498	7.30987e-76
Eif3h	6.49221e-68	0.212988	0.846	0.607	1.41238e-63
Colec12	2.76992e-78	0.212426	0.628	0.374	6.02596e-74
Gadd45b	3.41594e-32	0.211719	0.593	0.431	7.43137e-28
Adk	5.66193e-107	0.211448	0.566	0.295	1.23175e-102
Fgl2	1.2532e-25	0.21127	0.889	0.735	2.72635e-21
Rrad	1.10496e-60	0.21077	0.482	0.288	2.40385e-56
Ppp1r14b	6.19467e-104	0.210569	0.46	0.226	1.34765e-99
Rps6	8.6127e-81	0.20885	0.965	0.946	1.87369e-76
Capns1	8.01262e-67	0.20835	0.903	0.7	1.74315e-62
Tpi1	1.50102e-73	0.207025	0.785	0.508	3.26547e-69
Rhoc	7.96414e-62	0.206957	0.895	0.689	1.7326e-57
Cd9	7.44955e-70	0.206562	0.991	0.951	1.62065e-65
Tprgl	8.60505e-81	0.20456	0.753	0.467	1.87203e-76
Lrpap1	6.19671e-96	0.203967	0.607	0.328	1.34809e-91
Jun	1.48754e-23	0.203766	0.88	0.752	3.23615e-19
Marveld1	3.00774e-85	0.203497	0.649	0.374	6.54334e-81
Fosb	4.66821e-36	0.203243	0.559	0.407	1.01557e-31
Selenof	2.77274e-64	0.202612	0.88	0.65	6.0321e-60
Ddost	3.88979e-107	0.201412	0.597	0.309	8.46225e-103
Btf3	9.30982e-70	0.200776	0.929	0.805	2.02535e-65
Itm2c	1.32978e-93	0.200408	0.608	0.334	2.89293e-89
Phldb2	4.492e-79	0.200037	0.616	0.367	9.77235e-75
Hsp90ab1	4.41031e-85	0.198908	0.998	0.995	9.59463e-81
Hexa	1.51859e-113	0.19877	0.427	0.194	3.3037e-109
Rab6b	9.00209e-106	0.198717	0.235	0.084	1.9584e-101
Bag3	1.69902e-102	0.198164	0.391	0.182	3.69622e-98
Dpysl3	1.98549e-58	0.197882	0.761	0.518	4.31943e-54
H2-K1	3.3503e-75	0.197848	0.529	0.296	7.28858e-71
Pdia6	1.9711e-72	0.197777	0.613	0.365	4.28814e-68
Cenpb	1.49616e-94	0.197292	0.631	0.35	3.2549e-90
Tmed9	3.45269e-67	0.196518	0.725	0.452	7.51132e-63
Atraid	1.00915e-81	0.195644	0.676	0.396	2.1954e-77
Twist1	2.24714e-128	0.194991	0.339	0.131	4.88866e-124
Mtch1	5.86823e-98	0.194779	0.58	0.308	1.27663e-93
Eef1d	3.54531e-65	0.194419	0.924	0.761	7.71282e-61
Omd	2.8762e-89	0.194368	0.341	0.161	6.25716e-85
Ptgis	3.18824e-55	0.19417	0.974	0.887	6.93602e-51
Cox7a2l	2.32783e-60	0.193915	0.844	0.617	5.0642e-56
Cavin1	1.38593e-57	0.193736	0.938	0.809	3.01509e-53
Pcolce	3.77527e-100	0.193452	0.172	0.051	8.2131e-96
Hnrnpf	2.52481e-82	0.192789	0.683	0.399	5.49273e-78
Ckb	1.11375e-44	0.19274	0.605	0.416	2.42296e-40
Saraf	1.20767e-95	0.192624	0.595	0.318	2.62728e-91
Eif4h	4.91257e-107	0.191622	0.53	0.264	1.06873e-102
Ctsz	2.3927e-96	0.19096	0.577	0.306	5.20531e-92
Pdcl3	1.41833e-64	0.190335	0.791	0.533	3.08557e-60
Dnaja1	2.11754e-30	0.189655	0.886	0.728	4.60671e-26
H2-D1	2.66097e-46	0.189474	0.655	0.427	5.78895e-42
Arl6ip5	1.16178e-72	0.189332	0.736	0.459	2.52746e-68
Cd63	2.18454e-61	0.187931	0.973	0.886	4.75247e-57
Dnajc1	7.04338e-63	0.1879	0.682	0.426	1.53229e-58
Cct7	5.53853e-87	0.187458	0.646	0.367	1.20491e-82
Vasp	5.57778e-101	0.18691	0.571	0.296	1.21345e-96
Eif3f	4.37983e-59	0.186692	0.836	0.589	9.52831e-55
Pebp1	1.3253e-64	0.185842	0.845	0.581	2.88319e-60
Gstm1	1.10989e-49	0.184718	0.965	0.883	2.41458e-45
Tmem176a	4.83437e-100	0.184656	0.139	0.033	1.05172e-95
Vcam1	8.99294e-50	0.184466	0.19	0.091	1.95641e-45
Myom1	4.31303e-40	0.184137	0.782	0.56	9.38301e-36
Tmed3	3.2616e-80	0.183355	0.663	0.384	7.0956e-76
Txnip	1.69274e-60	0.183275	0.646	0.414	3.68257e-56
Sdc2	6.07599e-61	0.183243	0.693	0.437	1.32183e-56
Cct4	6.29764e-89	0.182871	0.591	0.321	1.37005e-84
C1ra	9.14322e-111	0.182689	0.141	0.029	1.98911e-106
Rpl13a	3.63213e-84	0.182602	0.963	0.972	7.9017e-80
Ahsa1	1.94379e-97	0.181953	0.526	0.268	4.22871e-93
Vdac2	2.66468e-73	0.181258	0.746	0.459	5.79702e-69
Mettl7a1	5.02911e-103	0.180805	0.313	0.131	1.09408e-98
Arl1	2.31866e-82	0.179954	0.655	0.374	5.04426e-78
Rpl14	8.31662e-75	0.179538	0.966	0.956	1.80928e-70
Rnh1	5.27445e-92	0.178563	0.597	0.319	1.14746e-87
Atp5a1	3.15611e-54	0.177412	0.844	0.592	6.86613e-50
Tsc22d1	3.59677e-46	0.177145	0.753	0.522	7.82477e-42
App	4.68617e-40	0.176482	0.914	0.76	1.01948e-35
Ndfip1	1.41291e-68	0.176156	0.749	0.469	3.07379e-64
Tmed2	8.8475e-64	0.176016	0.743	0.476	1.92477e-59
Oat	5.42985e-47	0.175413	0.91	0.727	1.18126e-42
Tmem59	5.10504e-55	0.1751	0.843	0.586	1.1106e-50
Klf4	3.65133e-31	0.174864	0.461	0.323	7.94346e-27
Fth1	4.98629e-97	0.174715	1	1	1.08477e-92
Ndufs2	4.60889e-100	0.17427	0.584	0.306	1.00266e-95
Fcgrt	3.43228e-110	0.173576	0.424	0.193	7.46692e-106
Etfa	1.40735e-82	0.17338	0.619	0.346	3.06169e-78
Ptov1	8.129e-87	0.17307	0.57	0.306	1.76846e-82
Dnajc3	2.51088e-54	0.172615	0.751	0.501	5.46243e-50
Gna11	4.7293e-102	0.17227	0.514	0.256	1.02886e-97
Arpc3	8.43721e-57	0.171444	0.805	0.543	1.83551e-52
Psap	2.06105e-36	0.170922	0.891	0.692	4.48381e-32
Gnai1	7.29623e-67	0.170476	0.6	0.359	1.5873e-62
Cct5	4.53155e-77	0.170183	0.627	0.359	9.85838e-73
Psma3	1.15054e-49	0.169699	0.812	0.565	2.503e-45
Prdx2	1.93632e-58	0.168582	0.824	0.562	4.21246e-54
Serpinb6a	3.49516e-60	0.168303	0.764	0.499	7.60373e-56
Ahnak2	1.54171e-70	0.168065	0.541	0.314	3.354e-66
Sec11a	3.73953e-73	0.168045	0.684	0.401	8.13534e-69
Ypel3	7.27589e-78	0.167722	0.645	0.375	1.58287e-73
Mxra8	3.9207e-67	0.16689	0.658	0.4	8.52949e-63
Smim14	5.34031e-51	0.166651	0.903	0.714	1.16178e-46
P4ha1	3.36687e-77	0.16598	0.513	0.282	7.32463e-73
Rps2	2.94456e-67	0.165904	0.97	0.972	6.40589e-63
C1s1	6.55223e-85	0.16587	0.142	0.04	1.42544e-80
Rasal2	3.47454e-96	0.165268	0.371	0.171	7.55886e-92
Pdia3	2.8876e-43	0.165155	0.859	0.636	6.28198e-39
Atp6ap2	5.9175e-110	0.165118	0.447	0.206	1.28735e-105
Hnrnpa0	2.89541e-60	0.16467	0.726	0.458	6.29897e-56
Hsp90aa1	9.99016e-26	0.164544	0.982	0.945	2.17336e-21
Rbm3	3.74319e-52	0.164449	0.782	0.539	8.14332e-48
Tmem204	8.60012e-94	0.163896	0.185	0.06	1.87096e-89
Nxn	1.80544e-93	0.163766	0.405	0.194	3.92773e-89
Snx3	9.65545e-50	0.163444	0.797	0.548	2.10054e-45
Ccdc85b	6.04708e-83	0.163392	0.556	0.305	1.31554e-78
Rpl8	3.57629e-72	0.163364	0.982	0.977	7.78022e-68
Cnpy2	6.83407e-70	0.163027	0.669	0.399	1.48675e-65
Tspan3	4.25174e-77	0.162891	0.636	0.365	9.24965e-73
Vkorc1	4.23334e-57	0.162678	0.74	0.479	9.20964e-53
Pgam1	2.11341e-74	0.162652	0.654	0.38	4.59772e-70
Rnf187	2.32518e-69	0.161783	0.68	0.407	5.05843e-65
Rpl4	1.65264e-46	0.161693	0.937	0.838	3.59532e-42
Rheb	3.49501e-47	0.161639	0.852	0.622	7.60338e-43
Lamc3	1.62936e-53	0.161141	0.236	0.121	3.54467e-49
Rasl11b	1.52152e-72	0.160248	0.496	0.281	3.31006e-68
Cd55	1.03043e-97	0.160159	0.116	0.022	2.24171e-93
Arpc1a	8.13938e-104	0.160056	0.408	0.186	1.77072e-99
Slc8a1	2.011e-68	0.1595	0.514	0.294	4.37493e-64
Eif3i	5.65534e-63	0.159402	0.724	0.453	1.23032e-58
Phip	6.33472e-71	0.159124	0.46	0.252	1.37812e-66
Cnn2	5.77112e-49	0.159092	0.738	0.499	1.25551e-44
Psmd7	2.28154e-57	0.158991	0.753	0.489	4.96348e-53
Kdelr1	1.98554e-77	0.158959	0.659	0.377	4.31955e-73
C1qtnf2	5.8122e-94	0.158484	0.396	0.188	1.26445e-89
Fkbp4	1.00633e-87	0.158471	0.556	0.294	2.18928e-83
Rhoa	1.39126e-44	0.158309	0.946	0.819	3.02669e-40
Gm16286	1.99063e-100	0.158243	0.415	0.192	4.33063e-96
Ier3	4.06637e-22	0.158124	0.485	0.355	8.84638e-18
Sdc3	7.15641e-97	0.158024	0.188	0.06	1.55688e-92
Wtip	1.89141e-66	0.157944	0.632	0.381	4.11476e-62
Ppib	6.49148e-43	0.157919	0.933	0.768	1.41222e-38
Lzts2	1.64867e-96	0.156738	0.302	0.127	3.58669e-92
Dnajb1	1.41818e-62	0.156434	0.424	0.236	3.08526e-58
Slc48a1	5.31035e-72	0.155782	0.625	0.361	1.15527e-67
Ecrg4	1.75872e-77	0.155775	0.139	0.042	3.82609e-73
Sept7	8.52112e-44	0.155473	0.949	0.801	1.85377e-39
Maf	1.26061e-80	0.154884	0.173	0.06	2.74246e-76
Lpl	1.66246e-79	0.154544	0.332	0.16	3.61668e-75
Lims2	5.64323e-48	0.154519	0.766	0.525	1.22769e-43
Selenbp1	5.54778e-93	0.154403	0.24	0.092	1.20692e-88
B2m	5.01733e-21	0.154352	0.917	0.783	1.09152e-16
Gas6	8.62364e-38	0.154242	0.713	0.489	1.87607e-33
Fkbp8	3.46955e-86	0.154123	0.476	0.243	7.548e-82
Tmem50a	1.8764e-50	0.153135	0.764	0.507	4.08212e-46
Dctn2	1.11965e-84	0.153012	0.557	0.296	2.4358e-80
Fzd1	1.07154e-72	0.152943	0.453	0.247	2.33113e-68
Phlda1	6.18712e-69	0.152545	0.231	0.103	1.34601e-64
Arf5	3.96226e-75	0.15233	0.603	0.34	8.61989e-71
Npdc1	3.56541e-74	0.15168	0.593	0.337	7.75655e-70
Hspa5	3.59723e-22	0.151463	0.935	0.814	7.82577e-18
Ssbp2	1.71558e-91	0.150825	0.454	0.225	3.73224e-87
Cyhr1	1.30702e-84	0.15068	0.486	0.252	2.84341e-80
Glul	3.06182e-85	0.150639	0.318	0.146	6.66098e-81
Ccn3	4.67123e-21	0.150573	0.968	0.936	1.01623e-16
Thbs1	4.51461e-44	0.150164	0.118	0.048	9.82153e-40
Stub1	9.3639e-69	0.149962	0.674	0.399	2.03712e-64
P3h4	2.29196e-96	0.149222	0.336	0.147	4.98617e-92
Ssr2	1.24172e-81	0.149141	0.542	0.291	2.70136e-77
Slc43a3	2.99011e-69	0.148866	0.16	0.059	6.50499e-65
Rtraf	2.70881e-53	0.148698	0.768	0.509	5.89302e-49
Rps4x	1.46885e-64	0.148584	0.981	0.989	3.19548e-60
Comt	2.33236e-71	0.148582	0.64	0.372	5.07405e-67
Plin3	8.65219e-97	0.148409	0.339	0.149	1.88228e-92
Myo1d	3.20027e-79	0.147982	0.43	0.221	6.9622e-75
Phyhd1	2.90417e-100	0.147761	0.273	0.106	6.31803e-96
Leprot	1.12375e-83	0.147658	0.465	0.24	2.44472e-79
Scn1b	1.73558e-88	0.147609	0.297	0.13	3.77576e-84
Tinagl1	9.12298e-47	0.147487	0.674	0.452	1.9847e-42
Cct8	1.69405e-72	0.147407	0.593	0.335	3.68541e-68
Nktr	5.24122e-58	0.147183	0.542	0.323	1.14023e-53
Prdx4	6.41023e-47	0.146698	0.814	0.567	1.39454e-42
Park7	7.82637e-43	0.146658	0.892	0.678	1.70263e-38
Rian	6.11341e-22	0.146652	0.15	0.09	1.32997e-17
Ftl1	2.85138e-28	0.146589	0.9	0.742	6.20317e-24
Gja4	3.54917e-56	0.14627	0.101	0.031	7.72122e-52
Sbno2	3.14859e-50	0.145872	0.188	0.09	6.84975e-46
Pabpn1	2.23187e-69	0.145468	0.574	0.325	4.85543e-65
Psma1	3.00529e-75	0.145403	0.588	0.326	6.53801e-71
Akr1a1	5.17119e-43	0.14517	0.832	0.609	1.12499e-38
B230118H07Rik	4.06691e-94	0.145061	0.449	0.218	8.84755e-90
Anxa5	5.9294e-40	0.145045	0.896	0.708	1.28994e-35
Rab7	7.54723e-75	0.144927	0.573	0.319	1.6419e-70
Tubb2a	3.69437e-75	0.144764	0.452	0.242	8.0371e-71
Ube2d2a	8.46939e-66	0.14454	0.654	0.389	1.84252e-61
Mbd2	1.34497e-85	0.144396	0.483	0.249	2.92599e-81
Socs2	5.3726e-82	0.144388	0.381	0.189	1.16881e-77
Ifitm3	1.24874e-15	0.1438	0.835	0.679	2.71664e-11
Thrb	6.43496e-71	0.143522	0.482	0.267	1.39993e-66
Snx17	2.85136e-87	0.14286	0.469	0.236	6.20313e-83
Rrp1	1.77618e-86	0.142712	0.513	0.267	3.86408e-82
Anxa2	6.60782e-40	0.142532	0.749	0.522	1.43753e-35
Dlg2	2.47281e-96	0.142336	0.122	0.025	5.3796e-92
Pnrc1	8.09049e-39	0.141233	0.856	0.651	1.76009e-34
Prmt1	2.34402e-90	0.141079	0.529	0.27	5.09941e-86
Jam3	8.84871e-84	0.14089	0.365	0.175	1.92504e-79
Pim3	5.99418e-83	0.140786	0.179	0.062	1.30403e-78
Erp29	7.51476e-87	0.140317	0.493	0.252	1.63484e-82
Gpi1	1.24233e-62	0.139722	0.672	0.404	2.70269e-58
Clec11a	1.42928e-59	0.139136	0.115	0.037	3.1094e-55
Nop53	8.92913e-81	0.139019	0.535	0.287	1.94253e-76
Fuca1	4.39737e-84	0.13807	0.367	0.176	9.56647e-80
Cryab	4.57705e-23	0.137744	0.911	0.775	9.95738e-19
Hmgcs2	3.43161e-85	0.137676	0.244	0.099	7.46547e-81
Armh4	8.63338e-82	0.137142	0.119	0.029	1.87819e-77
Scarb2	7.48028e-74	0.137111	0.413	0.215	1.62733e-69
Nab1	4.64412e-67	0.137022	0.517	0.293	1.01033e-62
Ergic3	2.6589e-76	0.136975	0.555	0.304	5.78444e-72
Cfl1	1.41199e-34	0.136888	0.91	0.749	3.07178e-30
Gm17056	8.41027e-55	0.136487	0.12	0.043	1.82965e-50
Slc29a1	8.88918e-70	0.1364	0.541	0.304	1.93384e-65
Tm2d2	2.29332e-88	0.136163	0.403	0.193	4.98911e-84
Srsf5	4.99369e-42	0.136156	0.769	0.528	1.08638e-37
Art4	3.54188e-82	0.135746	0.195	0.072	7.70536e-78
Tnfsf12	1.62871e-86	0.135097	0.499	0.257	3.54326e-82
Spint2	1.05671e-50	0.135048	0.63	0.399	2.29887e-46
Slc38a1	1.66144e-79	0.134753	0.243	0.102	3.61446e-75
Vim	6.53926e-28	0.134604	0.999	0.998	1.42261e-23
Prdx6	5.72524e-86	0.134172	0.489	0.25	1.24553e-81
Coq10b	2.2255e-53	0.133721	0.532	0.324	4.84157e-49
Swi5	6.70384e-41	0.133351	0.848	0.618	1.45842e-36
Emb	1.86547e-25	0.133276	0.55	0.401	4.05833e-21
Bmp3	6.70139e-57	0.132402	0.275	0.143	1.45789e-52
Sf3b1	5.32395e-44	0.132397	0.712	0.473	1.15823e-39
Ier5l	9.7371e-57	0.132368	0.309	0.166	2.11831e-52
Pdlim2	5.23614e-65	0.132152	0.549	0.32	1.13912e-60
Tmem134	1.20076e-64	0.131788	0.579	0.329	2.61225e-60
Emc10	3.06992e-49	0.131187	0.739	0.486	6.67861e-45
Il6st	4.11553e-69	0.130478	0.383	0.2	8.95333e-65
Zfp36l2	1.87387e-48	0.130383	0.527	0.333	4.0766e-44
Ywhaq	4.66091e-37	0.130327	0.889	0.69	1.01398e-32
Rabac1	3.39645e-37	0.12995	0.944	0.808	7.38899e-33
Maff	8.61758e-66	0.1299	0.255	0.12	1.87475e-61
Efhd2	6.93589e-61	0.129706	0.488	0.28	1.5089e-56
Pth1r	2.49083e-85	0.128985	0.157	0.048	5.41881e-81
March2	5.89383e-85	0.128963	0.462	0.233	1.2822e-80
Atp5b	2.00814e-34	0.128679	0.891	0.709	4.3687e-30
Camk1	1.68127e-68	0.128553	0.58	0.328	3.6576e-64
Stat3	4.2408e-61	0.128244	0.382	0.208	9.22585e-57
Atoh8	2.04295e-67	0.127912	0.263	0.124	4.44444e-63
Uqcrfs1	3.75392e-84	0.127875	0.525	0.273	8.16665e-80
Sept11	3.84766e-80	0.127638	0.205	0.078	8.37058e-76
Calr	5.40428e-30	0.127506	0.889	0.705	1.1757e-25
Birc2	1.08277e-71	0.12743	0.283	0.133	2.35557e-67
Gm12840	1.47898e-48	0.127338	0.261	0.141	3.21753e-44
Myh10	2.64036e-17	0.127312	0.865	0.707	5.7441e-13
Tmbim6	8.34213e-50	0.127024	0.739	0.478	1.81483e-45
Serinc1	2.57889e-36	0.126987	0.744	0.507	5.61037e-32
Tmem109	1.61288e-72	0.126812	0.528	0.288	3.50883e-68
Puf60	6.18405e-76	0.126266	0.357	0.176	1.34534e-71
Arhgdia	5.17878e-47	0.125823	0.719	0.468	1.12664e-42
Vdac3	1.39895e-58	0.125819	0.687	0.421	3.04342e-54
Akt1	6.70874e-84	0.125326	0.347	0.163	1.45949e-79
Sparcl1	3.14112e-05	0.125216	0.756	0.699	0.683351
Thra	2.00741e-30	0.124775	0.874	0.664	4.36713e-26
Ttll7	6.56708e-48	0.124746	0.588	0.37	1.42867e-43
Nudc	3.9048e-63	0.124607	0.613	0.357	8.49489e-59
Sumo2	1.33067e-33	0.124523	0.916	0.758	2.89487e-29
Ndnf	1.26311e-44	0.124286	0.104	0.039	2.74789e-40
Rpl5	5.52283e-45	0.123825	0.962	0.969	1.20149e-40
Acadvl	1.56771e-81	0.123607	0.342	0.161	3.41055e-77
Macf1	9.56734e-20	0.123519	0.845	0.671	2.08137e-15
Creld1	9.0478e-85	0.123464	0.244	0.098	1.96835e-80
Rab34	1.38077e-82	0.123296	0.365	0.174	3.00387e-78
Pxdc1	1.84182e-63	0.123215	0.498	0.284	4.00688e-59
Ppp1r15a	1.35227e-32	0.12294	0.557	0.387	2.94187e-28
Tspan4	6.18585e-85	0.12284	0.24	0.096	1.34573e-80
Vcan	5.77303e-30	0.122428	0.312	0.203	1.25592e-25
Yy1	1.07555e-60	0.122115	0.568	0.333	2.33985e-56
Adamts1	2.20366e-27	0.121828	0.581	0.424	4.79407e-23
Cpne8	9.094e-65	0.12177	0.146	0.053	1.9784e-60
Eif1	3.15989e-47	0.121757	0.997	0.995	6.87435e-43
Mmp2	2.96512e-57	0.121493	0.134	0.05	6.45061e-53
Tra2a	2.10284e-58	0.121479	0.5	0.288	4.57473e-54
Loxl2	1.758e-84	0.12145	0.133	0.036	3.82453e-80
Ndn	1.21024e-71	0.121434	0.202	0.082	2.63288e-67
Eif4a1	5.88002e-41	0.121414	0.791	0.547	1.2792e-36
Rab28	5.52489e-90	0.120923	0.334	0.149	1.20194e-85
Cdk9	2.7765e-80	0.120859	0.28	0.124	6.04027e-76
Pold4	1.99663e-68	0.120703	0.552	0.311	4.34368e-64
Eif4b	2.42649e-82	0.120214	0.391	0.191	5.27884e-78
Kazald1	7.95667e-71	0.120085	0.371	0.19	1.73097e-66
Atp5f1	5.90269e-42	0.120039	0.772	0.523	1.28413e-37
Mdh2	1.03485e-51	0.119943	0.661	0.407	2.25131e-47
Tspo	3.42102e-26	0.119884	0.95	0.853	7.44243e-22
H3f3b	5.06455e-22	0.119826	0.987	0.95	1.10179e-17
Prnp	4.57447e-68	0.119822	0.366	0.189	9.95177e-64
Ech1	3.6587e-61	0.119764	0.601	0.352	7.9595e-57
Gdi2	2.95799e-57	0.119366	0.665	0.403	6.43511e-53
Fbn1	1.18608e-39	0.119175	0.621	0.403	2.58031e-35
Cyth2	2.05213e-87	0.119067	0.273	0.113	4.46442e-83
S100a16	6.63664e-66	0.119041	0.566	0.32	1.4438e-61
Ifngr1	7.33399e-81	0.119004	0.275	0.12	1.59551e-76
Tmbim1	1.27143e-63	0.118759	0.415	0.225	2.766e-59
Pola2	3.46677e-79	0.118671	0.137	0.04	7.54195e-75
Matn2	3.26858e-81	0.118646	0.112	0.026	7.11079e-77
Yipf3	1.29816e-81	0.118618	0.388	0.188	2.82414e-77
Rcn1	1.2633e-75	0.118281	0.249	0.108	2.74832e-71
Stip1	1.12171e-70	0.118068	0.45	0.242	2.44029e-66
Ppm1a	1.22483e-72	0.117946	0.48	0.257	2.66461e-68
Jmjd1c	1.85172e-56	0.117839	0.37	0.204	4.02842e-52
Pbxip1	5.811e-23	0.117832	0.898	0.746	1.26418e-18
Bicd1	5.17796e-65	0.117746	0.412	0.223	1.12647e-60
Spsb2	7.51432e-78	0.11758	0.199	0.076	1.63474e-73
Aldh7a1	5.73993e-79	0.11757	0.333	0.156	1.24872e-74
Maf1	1.26349e-84	0.117523	0.359	0.168	2.74871e-80
Laptm4a	5.4317e-30	0.117452	0.944	0.803	1.18167e-25
Rpsa	2.951e-37	0.117442	0.98	0.982	6.41991e-33
Glrx3	8.65502e-76	0.117269	0.528	0.283	1.8829e-71
Mapk3	1.94762e-75	0.117156	0.355	0.174	4.23705e-71
Anp32b	5.51912e-34	0.116313	0.83	0.62	1.20069e-29
Ufc1	1.01724e-70	0.116005	0.551	0.304	2.21301e-66
Adamts5	1.97259e-63	0.115864	0.321	0.167	4.29136e-59
Klhdc8b	1.44667e-84	0.115753	0.243	0.098	3.14722e-80
Snta1	1.30911e-78	0.115732	0.365	0.177	2.84796e-74
Stk25	1.13473e-83	0.1157	0.31	0.139	2.46861e-79
Luzp1	2.58078e-59	0.11512	0.533	0.305	5.61449e-55
Aarsd1	6.38438e-78	0.114841	0.375	0.184	1.38892e-73
Bgn	1.7703e-23	0.114632	0.999	0.997	3.85129e-19
Cidea	9.52294e-64	0.114314	0.177	0.071	2.07172e-59
Manf	5.13604e-40	0.114195	0.705	0.467	1.11735e-35
Stk3	8.92106e-73	0.114101	0.298	0.141	1.94078e-68
Rasl12	7.38715e-53	0.113875	0.574	0.349	1.60707e-48
Anxa1	2.58953e-25	0.113842	0.734	0.541	5.63352e-21
Nkd1	1.37237e-72	0.113808	0.393	0.202	2.98559e-68
Lmod1	1.88354e-26	0.113728	0.982	0.949	4.09764e-22
Mettl9	2.54644e-87	0.113594	0.336	0.151	5.53978e-83
Reck	2.54721e-59	0.113436	0.344	0.183	5.54146e-55
Derl1	4.07943e-72	0.113214	0.379	0.191	8.87479e-68
Mbd3	1.60673e-75	0.11311	0.435	0.225	3.49545e-71
Npepl1	3.44913e-80	0.112801	0.273	0.119	7.50358e-76
Phlda3	4.82576e-56	0.112609	0.262	0.132	1.04984e-51
Mob2	5.2902e-45	0.112584	0.568	0.358	1.15088e-40
Txndc15	2.37727e-82	0.112445	0.368	0.175	5.17175e-78
Hip1	1.84605e-55	0.112425	0.522	0.307	4.01608e-51
Rpl29	9.08157e-34	0.112007	0.971	0.941	1.9757e-29
Oaz1	5.79835e-30	0.111849	0.967	0.917	1.26143e-25
Tmed4	6.29403e-78	0.111753	0.402	0.2	1.36927e-73
mt-Nd4l	3.59093e-10	0.111496	0.989	0.939	7.81206e-06
Npm1	6.68587e-26	0.111268	0.941	0.856	1.45451e-21
Cct3	1.34359e-69	0.11118	0.462	0.248	2.92298e-65
Myl12b	1.44167e-51	0.111117	0.62	0.386	3.13636e-47
Ccn1	1.32614e-06	0.111031	0.815	0.719	0.0288502
Dennd5b	1.40135e-65	0.110925	0.212	0.092	3.04863e-61
Capn2	9.69213e-74	0.110767	0.472	0.251	2.10852e-69
Ldha	2.72756e-34	0.110688	0.74	0.509	5.93381e-30
Fn1	1.19106e-09	0.110212	0.656	0.52	2.59116e-05
Map1lc3a	1.17527e-29	0.109848	0.911	0.757	2.5568e-25
mt-Atp8	1.7166e-58	0.109808	0.509	0.293	3.73445e-54
AI838599	1.27085e-66	0.109739	0.213	0.092	2.76473e-62
Eci2	9.44376e-75	0.109457	0.338	0.163	2.05449e-70
Stim1	5.62856e-64	0.109405	0.379	0.2	1.22449e-59
Ppp1r12c	5.72153e-75	0.109309	0.451	0.236	1.24472e-70
Mir99ahg	2.63775e-58	0.108936	0.212	0.097	5.73843e-54
Fam129b	7.37562e-78	0.108741	0.318	0.148	1.60457e-73
Tnfrsf1a	3.07428e-76	0.108637	0.248	0.106	6.68809e-72
Adh5	5.13943e-70	0.108285	0.41	0.213	1.11808e-65
Pon2	5.23434e-70	0.108074	0.372	0.189	1.13873e-65
mt-Nd6	4.31825e-61	0.108048	0.334	0.175	9.39434e-57
Snf8	6.89599e-75	0.108039	0.425	0.217	1.50022e-70
Wfdc1	4.54563e-31	0.107883	0.784	0.559	9.88901e-27
Hcfc1r1	4.16405e-25	0.107842	0.946	0.875	9.05889e-21
Smim3	1.81224e-70	0.107537	0.165	0.06	3.94254e-66
Sf3b2	4.58808e-46	0.107388	0.666	0.423	9.98136e-42
Strap	2.54229e-79	0.107332	0.344	0.163	5.53074e-75
Sri	1.89691e-63	0.107309	0.498	0.277	4.12673e-59
Stk11	6.233e-76	0.107278	0.309	0.144	1.35599e-71
Polr2c	1.08859e-66	0.107272	0.578	0.324	2.36822e-62
Glo1	4.80709e-45	0.107269	0.691	0.442	1.04578e-40
Itgb8	4.92648e-67	0.107072	0.174	0.067	1.07176e-62
Gtf2a2	8.39785e-63	0.107049	0.546	0.306	1.82695e-58
Anxa7	1.04918e-62	0.106962	0.551	0.315	2.2825e-58
Txndc5	3.73966e-63	0.10685	0.451	0.247	8.13563e-59
Psmb7	1.0986e-60	0.106749	0.553	0.317	2.39001e-56
Esd	3.32883e-41	0.106552	0.735	0.479	7.24186e-37
Pmm1	1.81016e-81	0.10652	0.283	0.124	3.938e-77
Psmc2	3.34754e-65	0.106465	0.483	0.265	7.28257e-61
Nr1h2	4.78317e-76	0.106399	0.354	0.172	1.04058e-71
Arid5a	3.85894e-55	0.106274	0.318	0.171	8.39512e-51
Mlf1	4.4506e-61	0.106234	0.136	0.048	9.68228e-57
Copb2	1.59052e-65	0.106206	0.487	0.267	3.46018e-61
Rps19	3.87701e-34	0.106178	0.96	0.972	8.43444e-30
Vstm4	5.09136e-66	0.106169	0.136	0.045	1.10762e-61
Lxn	2.8506e-58	0.105942	0.39	0.214	6.20147e-54
Mcrip1	2.5805e-67	0.105804	0.518	0.283	5.61388e-63
Unc50	3.14682e-70	0.105798	0.415	0.215	6.84591e-66
Mical3	9.05115e-65	0.10574	0.266	0.126	1.96908e-60
Hrct1	8.15855e-67	0.105648	0.166	0.063	1.77489e-62
Rhob	1.37842e-18	0.105342	0.886	0.727	2.99874e-14
Dcaf8	5.44157e-69	0.105166	0.36	0.183	1.18381e-64
Ubr5	4.55282e-57	0.105109	0.451	0.255	9.90466e-53
Eif5	5.23319e-29	0.105055	0.79	0.573	1.13848e-24
Gata6	5.9698e-30	0.104894	0.706	0.497	1.29873e-25
Tgm2	3.23084e-53	0.104889	0.547	0.328	7.0287e-49
Ube2s	2.64685e-53	0.104695	0.695	0.43	5.75823e-49
Nes	1.13241e-48	0.104533	0.406	0.238	2.46356e-44
Diablo	1.93342e-78	0.104418	0.269	0.117	4.20616e-74
Spr	6.90224e-73	0.104344	0.491	0.263	1.50158e-68
Pfdn2	1.73448e-53	0.104239	0.65	0.39	3.77335e-49
Ube2d3	2.20001e-31	0.104143	0.811	0.579	4.78612e-27
Efemp2	5.84457e-65	0.104069	0.47	0.257	1.27149e-60
Hspa1b	3.15993e-28	0.10389	0.599	0.439	6.87443e-24
Aspn	1.36684e-23	0.103699	0.455	0.334	2.97355e-19
Rpl17	5.84831e-40	0.103653	0.964	0.981	1.2723e-35
Trafd1	2.50822e-70	0.103344	0.343	0.17	5.45663e-66
Ccdc47	7.37831e-63	0.103258	0.421	0.228	1.60515e-58
Psmc4	1.37408e-64	0.103209	0.52	0.287	2.9893e-60
Ube2e1	4.34625e-75	0.103065	0.348	0.169	9.45527e-71
Scarf2	2.88573e-65	0.102957	0.196	0.082	6.27791e-61
Nsmce4a	3.0109e-68	0.102894	0.451	0.24	6.5502e-64
Ndrg2	5.95152e-37	0.102828	0.747	0.508	1.29475e-32
Pnck	2.75366e-73	0.102771	0.285	0.131	5.9906e-69
Cdk4	8.33207e-71	0.102661	0.367	0.184	1.81264e-66
Foxp2	1.01382e-44	0.102404	0.605	0.389	2.20556e-40
Samm50	3.50943e-77	0.102323	0.367	0.177	7.63477e-73
Mir22hg	2.07838e-43	0.102314	0.496	0.309	4.52152e-39
Eno1	9.33912e-61	0.102306	0.546	0.314	2.03173e-56
Herpud1	8.95226e-68	0.1023	0.415	0.219	1.94756e-63
Use1	1.65041e-38	0.102241	0.7	0.465	3.59046e-34
Wsb1	1.27881e-55	0.101823	0.406	0.227	2.78206e-51
Abhd16a	8.35802e-78	0.101518	0.299	0.136	1.81829e-73
Tmem165	5.87787e-67	0.101201	0.373	0.192	1.27873e-62
Col6a3	3.12511e-51	0.101157	0.41	0.236	6.79867e-47
Actg2	3.73629e-13	0.101154	0.377	0.3	8.1283e-09
Cltb	9.33669e-57	0.101053	0.595	0.349	2.0312e-52
Sox6	1.03551e-64	0.101025	0.165	0.063	2.25275e-60
Dap	5.03515e-51	0.100965	0.62	0.379	1.0954e-46
Fam89b	6.57312e-72	0.10087	0.39	0.197	1.42998e-67
Cd44	9.94651e-58	0.100775	0.179	0.077	2.16386e-53
Ifngr2	4.94841e-67	0.100667	0.427	0.228	1.07653e-62
Ccnl1	6.1542e-32	0.10065	0.57	0.385	1.33885e-27
Gnai2	5.13491e-24	0.100521	0.93	0.819	1.1171e-19
Zfand5	2.62092e-37	0.100468	0.675	0.45	5.70182e-33
Acaa2	1.99043e-70	0.100277	0.226	0.096	4.33018e-66
Sgcg	1.36045e-34	0.10018	0.623	0.422	2.95965e-30
Pgrmc1	3.81738e-55	0.100175	0.551	0.323	8.30471e-51
Osbpl9	1.59089e-69	0.100171	0.478	0.258	3.46099e-65
Iah1	9.39812e-75	0.100011	0.316	0.149	2.04456e-70
Fchsd2	4.07627e-59	0.0998092	0.34	0.179	8.86792e-55
Rpn2	7.9257e-41	0.0998046	0.645	0.41	1.72424e-36
Prex2	3.24486e-55	0.0997974	0.239	0.118	7.05919e-51
Atxn10	3.94716e-67	0.0997895	0.335	0.168	8.58704e-63
Bambi	1.11326e-60	0.0997516	0.366	0.197	2.4219e-56
Vat1	5.47955e-67	0.0995744	0.348	0.176	1.19208e-62
Lgmn	1.34511e-70	0.0995097	0.417	0.216	2.9263e-66
Rsu1	1.03088e-28	0.0994302	0.83	0.604	2.24269e-24
H2afx	3.43962e-62	0.0993187	0.184	0.077	7.4829e-58
Mpst	3.5251e-72	0.0992471	0.232	0.099	7.66885e-68
Ccdc141	1.73005e-56	0.099134	0.294	0.152	3.76372e-52
Mfsd10	2.18312e-65	0.0991151	0.239	0.108	4.74938e-61
Tmem140	3.54599e-68	0.0990726	0.167	0.062	7.7143e-64
Os9	4.06187e-66	0.0989665	0.245	0.111	8.8366e-62
Lars2	1.57291e-45	0.0989449	0.39	0.227	3.42186e-41
Mtfr1l	4.31359e-75	0.0988051	0.307	0.143	9.38422e-71
Glmp	1.52574e-71	0.0986399	0.303	0.142	3.31925e-67
Ube2m	3.93165e-58	0.0981123	0.557	0.321	8.5533e-54
Gm2a	8.9654e-64	0.0978767	0.423	0.227	1.95042e-59
Hnrnpd	7.69038e-63	0.0977245	0.501	0.28	1.67304e-58
Smad6	6.46658e-54	0.0974166	0.305	0.164	1.4068e-49
Tex264	6.69902e-74	0.0973301	0.267	0.119	1.45737e-69
Wwc2	8.75763e-61	0.0972427	0.375	0.201	1.90522e-56
Stoml2	1.29711e-75	0.0971637	0.317	0.148	2.82187e-71
Hexb	1.67042e-60	0.0971527	0.397	0.213	3.63399e-56
Mdh1	5.43438e-37	0.0971461	0.754	0.509	1.18225e-32
B4gat1	1.64159e-66	0.0970561	0.176	0.069	3.57128e-62
Bcap31	5.46445e-35	0.0970465	0.758	0.511	1.18879e-30
Tmem259	4.02064e-68	0.0968615	0.28	0.132	8.74691e-64
Kxd1	9.62882e-75	0.0968439	0.32	0.151	2.09475e-70
Rnf181	4.44363e-70	0.096789	0.272	0.125	9.66711e-66
Unc45a	2.54311e-67	0.0967555	0.376	0.193	5.53254e-63
Rpl7a	6.8425e-28	0.096637	0.957	0.932	1.48859e-23
Hacd2	2.59102e-70	0.0966188	0.244	0.108	5.63676e-66
Tsen34	1.50047e-57	0.0965314	0.548	0.312	3.26427e-53
Arhgef25	3.67835e-63	0.0965245	0.486	0.269	8.00225e-59
Ube2n	1.3887e-52	0.0963696	0.584	0.346	3.02111e-48
Atp2b1	9.15057e-49	0.0962612	0.484	0.287	1.99071e-44
Gna12	1.42903e-68	0.0961655	0.231	0.101	3.10886e-64
Qsox1	7.14129e-47	0.096127	0.588	0.364	1.55359e-42
Stx4a	6.40676e-69	0.0960821	0.414	0.216	1.39379e-64
Fnta	1.18149e-68	0.0959779	0.423	0.22	2.57034e-64
Nbea	1.66149e-63	0.0959498	0.224	0.101	3.61456e-59
Rdm1	5.51659e-73	0.0959216	0.327	0.157	1.20013e-68
Grn	9.28164e-53	0.0956263	0.508	0.296	2.01922e-48
Gpbp1	1.64581e-57	0.0955756	0.431	0.24	3.58045e-53
B3gat3	4.5884e-66	0.0954705	0.2	0.083	9.98207e-62
Myoz2	2.59801e-45	0.095434	0.187	0.092	5.65197e-41
Gm49708	6.26138e-46	0.0954125	0.212	0.108	1.36216e-41
Chsy1	9.02995e-57	0.095317	0.369	0.201	1.96447e-52
Psmd3	1.72236e-67	0.0950467	0.237	0.105	3.747e-63
Asph	3.55823e-36	0.0950414	0.647	0.424	7.74093e-32
Ifrd1	7.38285e-13	0.0950319	0.718	0.543	1.60614e-08
Usp9x	4.72537e-37	0.0950045	0.601	0.386	1.028e-32
Rab5if	1.699e-54	0.0949528	0.572	0.337	3.69617e-50
Sntb2	3.93284e-71	0.0949322	0.338	0.166	8.5559e-67
Rpl7l1	5.80887e-70	0.0948821	0.332	0.163	1.26372e-65
Plbd2	7.32367e-67	0.0947434	0.302	0.147	1.59326e-62
Rpl19	9.80817e-36	0.0945981	0.978	0.988	2.13377e-31
Polr1d	3.06704e-41	0.0945664	0.705	0.453	6.67234e-37
Slc25a11	4.66663e-68	0.0944672	0.265	0.122	1.01522e-63
Eif3e	4.75347e-27	0.0944617	0.82	0.612	1.03412e-22
Anxa11	4.51447e-54	0.094429	0.573	0.339	9.82123e-50
Akap13	1.94687e-42	0.0943081	0.588	0.371	4.23541e-38
Osmr	1.69955e-51	0.0942538	0.148	0.061	3.69737e-47
Snx18	2.01118e-44	0.0942164	0.555	0.346	4.37531e-40
Nudt18	9.12871e-68	0.0941291	0.209	0.087	1.98595e-63
Crlf2	5.19426e-60	0.094129	0.207	0.093	1.13001e-55
Asap1	1.76422e-60	0.0940847	0.37	0.197	3.83806e-56
Lama2	5.02673e-50	0.094064	0.136	0.055	1.09356e-45
Sdhc	1.01847e-52	0.0940384	0.607	0.361	2.21568e-48
Ube2i	5.28582e-52	0.0940352	0.572	0.338	1.14993e-47
BC031181	1.15411e-42	0.093903	0.678	0.427	2.51076e-38
Yipf4	8.56117e-43	0.0938955	0.657	0.413	1.86248e-38
Prkra	1.44126e-65	0.0938849	0.186	0.075	3.13546e-61
Gm42418	0.000608285	0.0938288	0.984	0.947	1
Pde3a	3.31448e-19	0.0937714	0.783	0.592	7.21066e-15
Vmp1	1.03333e-62	0.0935609	0.265	0.128	2.24801e-58
Cacna2d1	5.39118e-39	0.0935414	0.565	0.359	1.17285e-34
Grb2	2.17235e-67	0.0934104	0.342	0.171	4.72594e-63
Itih4	5.96297e-13	0.0934023	0.404	0.306	1.29725e-08
Ndufv1	8.55663e-67	0.093274	0.461	0.246	1.8615e-62
Slc50a1	1.88649e-64	0.0932187	0.39	0.205	4.10406e-60
Psma4	1.63627e-34	0.0931775	0.724	0.487	3.5597e-30
Cnpy3	3.4182e-67	0.0931411	0.231	0.102	7.4363e-63
Rarres2	6.38749e-20	0.0930724	0.962	0.883	1.3896e-15
Rbm42	1.05793e-61	0.0928727	0.506	0.281	2.30152e-57
Ephx1	2.60221e-62	0.0928062	0.36	0.189	5.66111e-58
Pnpla2	4.92171e-68	0.0927531	0.33	0.163	1.07072e-63
Akr1b3	9.35506e-64	0.0927122	0.46	0.25	2.03519e-59
Fam174a	1.0837e-66	0.0927057	0.533	0.293	2.35759e-62
Paqr6	4.65075e-51	0.0926649	0.19	0.088	1.01177e-46
Klf15	7.97642e-66	0.092643	0.19	0.077	1.73527e-61
Ddrgk1	2.0854e-59	0.0925463	0.583	0.338	4.5368e-55
Txnl1	3.07051e-59	0.0924762	0.518	0.292	6.67991e-55
Smim7	2.45062e-63	0.0924659	0.492	0.273	5.33133e-59
Sdha	1.00195e-71	0.0924565	0.438	0.228	2.17973e-67
G3bp1	6.79089e-63	0.0923965	0.453	0.247	1.47736e-58
Ghr	3.66151e-65	0.0922306	0.231	0.104	7.96561e-61
Sord	1.61778e-69	0.0922288	0.172	0.064	3.51949e-65
Tjp1	1.8867e-53	0.0922165	0.424	0.241	4.10451e-49
Psme2	2.88515e-60	0.0921945	0.511	0.287	6.27665e-56
Plpp1	1.15586e-55	0.0921541	0.44	0.248	2.51457e-51
Uqcrc2	2.03804e-66	0.091747	0.509	0.277	4.43375e-62
Rapgef5	9.16996e-51	0.0917229	0.257	0.133	1.99493e-46
Hadhb	3.45102e-69	0.0917205	0.403	0.208	7.5077e-65
Cyp20a1	2.04719e-63	0.0916875	0.214	0.094	4.45366e-59
Tob1	1.0731e-39	0.0915298	0.394	0.242	2.33453e-35
Ifnar2	1.80788e-62	0.0915078	0.389	0.207	3.93305e-58
Ctsb	4.55487e-20	0.0913251	0.898	0.716	9.90912e-16
P3h3	4.24593e-66	0.0913012	0.397	0.208	9.23702e-62
Mcfd2	1.39356e-69	0.091205	0.296	0.141	3.03168e-65
Slc7a2	3.31752e-53	0.091199	0.141	0.056	7.21726e-49
Hspa9	4.13101e-70	0.0911165	0.399	0.205	8.98702e-66
Srsf9	7.81993e-55	0.0911152	0.552	0.317	1.70123e-50
Acaa1a	3.32715e-67	0.0910961	0.417	0.22	7.23821e-63
Suclg1	1.19428e-58	0.0910467	0.53	0.301	2.59817e-54
Ctsf	2.89524e-63	0.0909943	0.252	0.118	6.2986e-59
Fbxw2	2.43922e-72	0.0908431	0.339	0.164	5.30651e-68
Dut	1.3587e-48	0.0903759	0.375	0.214	2.95585e-44
Pdcd6	1.57784e-51	0.0901834	0.532	0.312	3.4326e-47
Rbp1	9.85078e-13	0.0900382	0.959	0.935	2.14304e-08
Fry	4.3935e-36	0.0900091	0.593	0.385	9.55807e-32
C1d	7.60016e-67	0.089851	0.518	0.282	1.65341e-62
Pfkl	2.45711e-67	0.0898055	0.184	0.072	5.34545e-63
Gsn	9.45104e-17	0.0896849	0.845	0.66	2.05607e-12
Rps3a1	6.31998e-37	0.0895449	0.985	0.993	1.37491e-32
Sys1	2.31618e-73	0.0895007	0.355	0.173	5.03885e-69
C2cd2	8.9465e-65	0.0893868	0.186	0.076	1.94631e-60
Hnrnpu	2.92303e-29	0.0892568	0.692	0.477	6.35906e-25
Hprt	5.17413e-74	0.0890719	0.419	0.212	1.12563e-69
Psmd13	8.63643e-62	0.0890173	0.469	0.257	1.87885e-57
Cap1	9.47637e-50	0.0889455	0.573	0.344	2.06158e-45
Tax1bp3	4.68817e-61	0.0888154	0.485	0.27	1.01991e-56
Eprs	5.5862e-52	0.0888048	0.475	0.277	1.21528e-47
Unc119	7.73159e-67	0.0886526	0.25	0.114	1.68201e-62
Pcdh9	1.02218e-48	0.0885984	0.1	0.034	2.22376e-44
Psmb1	5.51829e-24	0.0883866	0.83	0.625	1.2005e-19
Cldnd1	4.52654e-45	0.0883692	0.57	0.35	9.84748e-41
Csnk1e	1.38757e-64	0.0882582	0.322	0.161	3.01866e-60
Rpl10	2.73996e-29	0.0882169	0.989	0.995	5.96079e-25
Timm23	3.72073e-69	0.088192	0.322	0.156	8.09444e-65
Dmd	5.92501e-13	0.0880933	0.879	0.709	1.28899e-08
Col4a4	3.67634e-47	0.0880823	0.156	0.07	7.99788e-43
Psmc5	8.41062e-62	0.0877925	0.533	0.299	1.82973e-57
Brk1	6.27623e-41	0.0876785	0.696	0.447	1.36539e-36
Echs1	8.89072e-63	0.0875218	0.466	0.253	1.93418e-58
Psmb2	8.67007e-44	0.0874071	0.707	0.446	1.88617e-39
Cuedc1	3.81734e-67	0.0873805	0.275	0.129	8.30461e-63
Arfgap2	6.42623e-63	0.0873628	0.201	0.086	1.39803e-58
Nbl1	1.56409e-62	0.0873556	0.269	0.13	3.40269e-58
Tpm2	9.03786e-18	0.0872643	0.997	0.996	1.96619e-13
Sparc	3.80394e-12	0.0872579	0.992	0.981	8.27547e-08
Tmod1	3.299e-66	0.0871264	0.177	0.069	7.17698e-62
Zfp638	3.18163e-60	0.0870415	0.341	0.178	6.92165e-56
Pik3ip1	4.0691e-61	0.0870198	0.18	0.074	8.85232e-57
Nap1l4	7.99483e-65	0.0870186	0.47	0.255	1.73928e-60
Adamts6	5.40089e-54	0.0868252	0.175	0.077	1.17496e-49
Snx24	1.83421e-69	0.0865942	0.261	0.118	3.99033e-65
Gipc1	4.05021e-66	0.0865529	0.208	0.088	8.81123e-62
Shisa4	5.6512e-51	0.0864229	0.465	0.272	1.22942e-46
Phb2	1.46293e-71	0.0862749	0.361	0.178	3.1826e-67
Nae1	5.25193e-61	0.0861869	0.34	0.175	1.14256e-56
Manbal	1.05974e-64	0.0861293	0.479	0.26	2.30545e-60
Smpdl3a	1.60866e-56	0.0860099	0.46	0.259	3.49963e-52
Rapgef6	7.20822e-58	0.0858829	0.302	0.155	1.56815e-53
Gng10	1.08439e-50	0.0858698	0.612	0.365	2.35909e-46
Pde4d	1.59921e-60	0.0857894	0.121	0.039	3.47908e-56
Ppp2ca	8.83803e-45	0.0857343	0.622	0.384	1.92271e-40
Klhdc2	6.89525e-69	0.0856351	0.371	0.186	1.50006e-64
Lemd2	3.06399e-65	0.0854165	0.202	0.085	6.66571e-61
Dohh	4.35183e-69	0.0853476	0.326	0.158	9.46741e-65
Rnf7	1.58068e-39	0.0852127	0.683	0.437	3.43876e-35
Tns3	2.00422e-58	0.0851525	0.25	0.12	4.36018e-54
Mmp23	1.17975e-42	0.0851457	0.581	0.366	2.56656e-38
Slc44a2	1.51765e-57	0.0850208	0.356	0.19	3.30164e-53
Guk1	7.05347e-57	0.0849521	0.565	0.324	1.53448e-52
Igfbp2	3.58154e-06	0.0848984	0.111	0.084	0.0779164
Tvp23b	1.51301e-64	0.0846418	0.289	0.14	3.29154e-60
Eif4ebp1	1.1268e-58	0.0846248	0.494	0.279	2.45136e-54
Fam8a1	2.59513e-61	0.0846184	0.297	0.148	5.6457e-57
Rbms2	1.23988e-70	0.084593	0.344	0.168	2.69735e-66
Amd1	3.32039e-64	0.0845468	0.28	0.134	7.22351e-60
Phc2	4.63562e-59	0.0845111	0.257	0.124	1.00848e-54
Vldlr	6.9642e-32	0.0844727	0.657	0.446	1.51506e-27
Tsc22d3	8.99005e-47	0.0844666	0.164	0.075	1.95579e-42
Emp1	7.53809e-38	0.0844478	0.109	0.046	1.63991e-33
Mfsd6	3.99562e-55	0.0844401	0.185	0.082	8.69247e-51
Hibadh	9.97962e-66	0.0844179	0.42	0.221	2.17107e-61
Unc5b	4.05196e-57	0.084395	0.132	0.048	8.81504e-53
Sdf2	8.514e-60	0.084321	0.439	0.238	1.85222e-55
Abhd17a	2.31126e-73	0.0843118	0.361	0.177	5.02815e-69
Dynlt3	3.53908e-37	0.0841823	0.71	0.47	7.69926e-33
Hars	4.94937e-64	0.0841569	0.212	0.092	1.07674e-59
Flot1	2.55124e-59	0.0841459	0.374	0.198	5.55022e-55
Gm26632	1.06738e-45	0.0840726	0.204	0.102	2.32209e-41
Clta	4.95621e-30	0.083871	0.792	0.557	1.07822e-25
Vasn	6.09367e-50	0.0838534	0.572	0.347	1.32568e-45
Atf4	5.43431e-35	0.083803	0.637	0.424	1.18223e-30
Actr10	3.84724e-60	0.083658	0.52	0.29	8.36967e-56
Tkt	4.13288e-53	0.0835722	0.506	0.29	8.99108e-49
Nsmce3	4.12376e-65	0.0835173	0.212	0.091	8.97124e-61
Ei24	2.75668e-62	0.0834808	0.226	0.102	5.99716e-58
Psmb4	4.76093e-25	0.0834585	0.808	0.588	1.03574e-20
Prune2	5.92117e-49	0.0834507	0.11	0.04	1.28815e-44
Ostf1	7.35734e-51	0.08302	0.501	0.291	1.60059e-46
Fkbp9	9.4335e-51	0.0830135	0.551	0.328	2.05226e-46
Ccl19	2.7184e-37	0.0829978	0.107	0.045	5.91388e-33
Lamb2	6.87651e-19	0.0829636	0.757	0.543	1.49598e-14
Rilpl1	2.56849e-64	0.0827212	0.28	0.134	5.58775e-60
Sgta	3.79286e-65	0.0826369	0.26	0.121	8.25136e-61
Ldhb	2.76942e-46	0.0825336	0.603	0.369	6.02487e-42
Hmox2	2.78804e-71	0.0825061	0.278	0.127	6.06538e-67
Capg	6.36118e-60	0.0823808	0.17	0.069	1.38387e-55
Ahsa2	1.86408e-66	0.082204	0.321	0.158	4.0553e-62
Ttc19	2.66732e-54	0.0821873	0.206	0.095	5.80275e-50
Eif3d	1.00156e-64	0.082101	0.429	0.227	2.17889e-60
Wwtr1	1.15303e-56	0.0820927	0.464	0.263	2.50842e-52
9530068E07Rik	4.15568e-44	0.0819717	0.632	0.389	9.04069e-40
Gng8	8.41025e-57	0.081924	0.198	0.089	1.82965e-52
Cacybp	7.31841e-41	0.0819119	0.642	0.416	1.59212e-36
Fbl	7.98298e-63	0.0818996	0.293	0.143	1.7367e-58
Aph1a	5.48199e-69	0.0817767	0.248	0.11	1.19261e-64
Izumo4	2.22011e-60	0.0816843	0.214	0.096	4.82985e-56
Ap2m1	1.71463e-42	0.0816318	0.656	0.412	3.73018e-38
Csnk1g2	1.4042e-59	0.0815849	0.416	0.226	3.05483e-55
Coq2	2.01018e-65	0.0813617	0.279	0.132	4.37315e-61
Col6a1	9.51747e-40	0.081153	0.503	0.314	2.07053e-35
Imp3	3.32683e-53	0.081153	0.558	0.326	7.23751e-49
Gatd3a	3.95686e-70	0.0810571	0.255	0.114	8.60815e-66
Prpf19	4.96124e-62	0.0809231	0.262	0.124	1.07932e-57
Nudt9	8.36781e-68	0.080817	0.295	0.14	1.82042e-63
Odc1	4.0457e-54	0.0807722	0.48	0.278	8.80142e-50
Tmem106b	1.67602e-40	0.080757	0.558	0.348	3.64618e-36
Snrpb	3.20415e-28	0.0806246	0.803	0.563	6.97063e-24
Eml2	7.09977e-55	0.0805448	0.342	0.183	1.54456e-50
Stxbp3	1.0224e-59	0.0805427	0.299	0.15	2.22423e-55
Smim1	1.68261e-59	0.0805136	0.196	0.085	3.66053e-55
Ggh	1.75823e-58	0.0804958	0.412	0.224	3.82503e-54
4933434E20Rik	6.61077e-63	0.0804358	0.188	0.078	1.43817e-58
Ndufa9	7.36386e-69	0.0803268	0.354	0.175	1.60201e-64
Psmb6	9.65532e-23	0.0802934	0.845	0.642	2.10051e-18
Tns2	6.40101e-60	0.0802923	0.399	0.215	1.39254e-55
Dnajb11	4.57326e-58	0.0802689	0.268	0.132	9.94912e-54
Cav3	7.4173e-57	0.08018	0.259	0.127	1.61363e-52
Sar1b	8.06068e-59	0.0801004	0.494	0.274	1.7536e-54
Gja1	8.02006e-17	0.0800876	0.439	0.32	1.74476e-12
Copb1	6.62455e-49	0.0800753	0.5	0.295	1.44117e-44
Ptges3l	3.44184e-68	0.0800322	0.363	0.183	7.48772e-64
Pycr2	3.7447e-59	0.0799211	0.189	0.081	8.14659e-55
Pmp22	2.17809e-37	0.0798903	0.616	0.396	4.73844e-33
Grhpr	2.12408e-66	0.0798867	0.255	0.117	4.62094e-62
Slc25a3	7.47116e-20	0.0797807	0.921	0.778	1.62535e-15
Sptan1	6.03148e-45	0.0797058	0.467	0.279	1.31215e-40
Sdf4	3.638e-38	0.0797033	0.638	0.409	7.91446e-34
Gps1	3.12133e-67	0.0795219	0.299	0.144	6.79045e-63
Pnp	6.64658e-51	0.079447	0.258	0.132	1.44596e-46
Bckdha	1.88518e-61	0.0794403	0.209	0.092	4.1012e-57
Arf4	7.42004e-22	0.0794175	0.837	0.632	1.61423e-17
Bhlhe40	9.96182e-34	0.079356	0.159	0.084	2.16719e-29
Dlgap4	1.47007e-47	0.0793322	0.455	0.266	3.19813e-43
Ogt	5.61604e-49	0.079278	0.273	0.145	1.22177e-44
Gpx4	1.38892e-19	0.0791458	0.929	0.839	3.02159e-15
Nat14	1.59547e-67	0.0790303	0.209	0.088	3.47095e-63
Smpd1	4.36712e-64	0.078999	0.261	0.122	9.50067e-60
Rps6kb1	6.74466e-58	0.0788562	0.27	0.133	1.4673e-53
Runx1t1	1.16101e-47	0.0787987	0.44	0.262	2.52577e-43
Cct6a	1.43443e-42	0.0787242	0.631	0.397	3.12061e-38
Hras	4.47999e-52	0.0786865	0.484	0.278	9.74621e-48
Ddr1	4.87524e-51	0.0786715	0.159	0.068	1.06061e-46
Cnih1	8.09389e-61	0.0786627	0.488	0.268	1.76083e-56
Rtcb	8.25046e-63	0.0786492	0.293	0.144	1.79489e-58
Gstt1	5.47219e-58	0.0786418	0.456	0.255	1.19047e-53
Zbtb38	1.82654e-30	0.0784462	0.659	0.448	3.97363e-26
Sirt2	4.16683e-62	0.0784066	0.332	0.168	9.06494e-58
Tmed5	2.25316e-48	0.0784034	0.267	0.141	4.90175e-44
Phactr1	2.04386e-47	0.0783873	0.334	0.188	4.44641e-43
BC028528	1.04771e-59	0.0783034	0.275	0.134	2.27929e-55
Ccpg1	2.57595e-50	0.0782538	0.471	0.274	5.60399e-46
C1qtnf7	1.74136e-53	0.0779581	0.258	0.13	3.78834e-49
Chka	2.677e-42	0.0776714	0.272	0.152	5.82382e-38
Slc5a3	2.08637e-33	0.0775669	0.259	0.154	4.5389e-29
Ergic2	2.18557e-52	0.0775394	0.347	0.188	4.75471e-48
Pitpna	4.51868e-52	0.0775268	0.52	0.302	9.83039e-48
Slc39a7	2.92811e-61	0.0775248	0.236	0.109	6.37009e-57
Art3	4.81529e-29	0.0775201	0.12	0.06	1.04757e-24
Pgk1	7.26051e-66	0.0774462	0.419	0.22	1.57952e-61
Slc3a2	2.7912e-59	0.0774413	0.272	0.133	6.07226e-55
Dlc1	1.59487e-43	0.0773706	0.43	0.257	3.46963e-39
Nudt4	2.46102e-10	0.0772553	0.888	0.757	5.35394e-06
Commd8	1.97664e-69	0.077168	0.251	0.112	4.30018e-65
Arl2bp	5.4109e-64	0.0771125	0.294	0.143	1.17714e-59
C1qtnf1	1.49286e-51	0.0770311	0.108	0.037	3.24771e-47
Ndufs3	2.61708e-49	0.0770049	0.584	0.346	5.69345e-45
Plxna2	3.25858e-42	0.076964	0.134	0.059	7.08904e-38
H13	2.54867e-54	0.076653	0.372	0.203	5.54462e-50
Pcmt1	3.62446e-54	0.0766302	0.492	0.279	7.88501e-50
Itga8	0.0020077	0.0765181	0.985	0.949	1
Capzb	1.74411e-24	0.0762541	0.821	0.595	3.7943e-20
Bub3	6.42022e-56	0.0762259	0.425	0.234	1.39672e-51
Abhd14b	2.3381e-61	0.0759837	0.248	0.116	5.08654e-57
Bag2	4.60636e-59	0.0757845	0.249	0.119	1.00211e-54
Cib2	8.64162e-58	0.0757615	0.187	0.08	1.87998e-53
Fubp1	4.7872e-53	0.0757315	0.369	0.204	1.04146e-48
Fhl1	4.56762e-17	0.075724	0.964	0.874	9.93686e-13
Tgfb1	3.02626e-51	0.0753452	0.192	0.089	6.58364e-47
Psma6	6.75674e-45	0.0751686	0.624	0.383	1.46993e-40
Cyb5r3	1.0759e-17	0.0751623	0.908	0.788	2.34062e-13
Ggnbp2	3.94583e-54	0.0751275	0.388	0.214	8.58415e-50
Clptm1l	2.04125e-60	0.0750796	0.331	0.169	4.44075e-56
Sidt2	3.02631e-63	0.0750089	0.281	0.135	6.58374e-59
Hmgn2	3.257e-62	0.0749488	0.351	0.181	7.08561e-58
Mindy2	1.97215e-52	0.0749437	0.202	0.095	4.29042e-48
Polr3k	6.99119e-66	0.0748189	0.235	0.104	1.52093e-61
Grina	2.91736e-62	0.0747152	0.259	0.122	6.34671e-58
Ltbp2	6.00158e-35	0.0747145	0.187	0.101	1.30564e-30
Drap1	1.6198e-24	0.0747047	0.818	0.598	3.52387e-20
Plekho1	1.68615e-49	0.0746985	0.478	0.279	3.66821e-45
Igbp1	6.44645e-65	0.0745575	0.31	0.151	1.40243e-60
Pip4p1	2.15318e-53	0.0745339	0.184	0.082	4.68424e-49
Trp53i13	5.22101e-56	0.0744999	0.229	0.108	1.13583e-51
Ptp4a3	1.03073e-52	0.0743302	0.4	0.223	2.24236e-48
Spats2l	6.05901e-36	0.0743103	0.522	0.331	1.31814e-31
Rpl11	2.51925e-19	0.0741564	0.983	0.978	5.48064e-15
Mpnd	1.86777e-62	0.0741438	0.294	0.144	4.06332e-58
Plscr3	7.98717e-59	0.0741235	0.189	0.081	1.73761e-54
Nr1d2	2.54884e-60	0.0740362	0.182	0.076	5.545e-56
Rrp7a	2.86977e-56	0.0739177	0.168	0.07	6.24319e-52
Pura	9.89157e-26	0.0738526	0.771	0.55	2.15191e-21
Mrps7	3.48744e-64	0.0738256	0.311	0.153	7.58692e-60
Pex13	2.75463e-58	0.0737636	0.182	0.077	5.99269e-54
Tagln	3.56873e-15	0.0737363	1	0.999	7.76377e-11
Ccnd3	5.69033e-56	0.0736642	0.43	0.238	1.23793e-51
Ebp	3.51471e-54	0.0736418	0.191	0.086	7.64624e-50
Susd2	8.72351e-51	0.0736247	0.112	0.039	1.8978e-46
Dnal4	5.42534e-54	0.0735046	0.161	0.067	1.18028e-49
4930453N24Rik	9.36008e-62	0.0733609	0.222	0.099	2.03629e-57
Mrps18a	1.45038e-63	0.0733007	0.415	0.217	3.1553e-59
Mlf2	1.5507e-38	0.0732577	0.691	0.442	3.37354e-34
Tbxa2r	7.53001e-51	0.0730427	0.241	0.121	1.63815e-46
Nr2f6	8.76588e-62	0.0730018	0.25	0.117	1.90702e-57
Rer1	5.74595e-32	0.0729978	0.671	0.442	1.25003e-27
Eif6	2.02085e-66	0.0729652	0.351	0.176	4.39637e-62
Trim47	2.94129e-47	0.0729574	0.347	0.196	6.39877e-43
Plin2	2.08737e-56	0.0728293	0.18	0.077	4.54108e-52
Mif4gd	1.49785e-63	0.0728267	0.255	0.118	3.25857e-59
Tmem159	2.41322e-57	0.0727473	0.175	0.073	5.24996e-53
Borcs6	4.07681e-47	0.0727274	0.111	0.041	8.86911e-43
Coa3	3.73204e-51	0.0727055	0.603	0.357	8.11905e-47
Sgce	7.02769e-59	0.0726777	0.357	0.188	1.52887e-54
Cul1	9.74335e-48	0.0726694	0.463	0.27	2.11966e-43
Zc3h14	5.72604e-57	0.0726422	0.303	0.155	1.2457e-52
P4ha2	1.58853e-56	0.0725976	0.231	0.109	3.45585e-52
Sdhd	7.25549e-62	0.0725354	0.348	0.178	1.57843e-57
Serinc3	2.46559e-19	0.0723883	0.835	0.632	5.36389e-15
Glt8d1	9.64037e-59	0.0722248	0.227	0.105	2.09726e-54
Smchd1	3.42852e-49	0.0721353	0.415	0.237	7.45876e-45
Psd3	4.14929e-53	0.07211	0.234	0.115	9.02678e-49
Ola1	3.94414e-59	0.0721068	0.392	0.209	8.58048e-55
Srsf2	1.10056e-18	0.0720513	0.795	0.593	2.39427e-14
Mob4	9.6767e-42	0.0719509	0.599	0.368	2.10517e-37
Ryk	2.16e-56	0.0719429	0.473	0.264	4.69908e-52
Oser1	1.36005e-56	0.0718415	0.166	0.068	2.95879e-52
Mcrs1	1.54364e-55	0.0715942	0.198	0.089	3.35819e-51
Lrp10	1.35142e-52	0.0715763	0.306	0.161	2.94002e-48
Srsf3	1.04928e-19	0.0715691	0.853	0.655	2.2827e-15
Pdzrn3	1.52633e-58	0.0715597	0.271	0.134	3.32053e-54
Cops4	4.2398e-62	0.0714375	0.326	0.163	9.22368e-58
Gnai3	2.31896e-56	0.0714004	0.422	0.233	5.04489e-52
Rrs1	8.60115e-49	0.071322	0.159	0.07	1.87118e-44
Tiprl	2.48171e-60	0.0710823	0.352	0.182	5.39897e-56
Sertad1	2.90774e-36	0.0710779	0.47	0.302	6.32579e-32
Tmtc2	9.5769e-45	0.071071	0.297	0.165	2.08345e-40
Cr1l	1.62435e-59	0.0710551	0.434	0.237	3.53378e-55
Nfkb2	4.82755e-49	0.0710548	0.111	0.04	1.05023e-44
Snx14	4.83722e-55	0.0709309	0.195	0.088	1.05234e-50
Bcl7c	2.76567e-55	0.0709254	0.41	0.225	6.0167e-51
Aip	1.09418e-55	0.0708735	0.435	0.241	2.38038e-51
Suds3	4.73444e-60	0.070817	0.263	0.127	1.02998e-55
Snrpa	3.79733e-63	0.0708064	0.322	0.16	8.2611e-59
Atp11b	4.92819e-46	0.0707818	0.331	0.186	1.07213e-41
Ppil1	1.14489e-55	0.0707734	0.211	0.097	2.4907e-51
Lamtor3	1.71769e-59	0.0706856	0.455	0.247	3.73683e-55
Trpc4ap	1.59126e-51	0.0706791	0.22	0.106	3.46179e-47
Gab2	2.57879e-56	0.0706606	0.251	0.122	5.61016e-52
Frmd4b	5.16458e-48	0.0705748	0.17	0.077	1.12355e-43
Limd1	3.15696e-56	0.0705736	0.304	0.157	6.86796e-52
Gpx1	1.03224e-09	0.0705072	0.95	0.926	2.24565e-05
Tanc2	1.09161e-45	0.0704089	0.241	0.126	2.37481e-41
Aktip	7.23629e-62	0.0703078	0.366	0.19	1.57426e-57
Tpd52l1	3.92018e-44	0.0702798	0.22	0.114	8.52835e-40
Serpine1	1.08404e-10	0.0702062	0.527	0.413	2.35833e-06
Rcbtb2	2.12988e-57	0.0701993	0.179	0.076	4.63356e-53
Carmn	7.74838e-38	0.0701654	0.11	0.047	1.68566e-33
Tex261	2.07988e-60	0.070143	0.31	0.156	4.52478e-56
Plcl1	1.70012e-51	0.0700678	0.161	0.069	3.6986e-47
Shisa5	4.66997e-62	0.0700588	0.303	0.15	1.01595e-57
Fam92a	6.5757e-59	0.0700521	0.354	0.185	1.43054e-54
Atp6v0c	1.64554e-19	0.07004	0.873	0.689	3.57987e-15
Podxl2	2.12399e-51	0.0700065	0.148	0.061	4.62074e-47
Mllt11	3.20435e-49	0.0699721	0.136	0.055	6.97106e-45
Tbc1d10a	3.263e-53	0.0699318	0.121	0.043	7.09867e-49
Iscu	8.43518e-23	0.0699061	0.827	0.599	1.83507e-18
Tap2	9.10668e-48	0.0697687	0.106	0.037	1.98116e-43
Eif3g	6.31173e-50	0.0697106	0.529	0.308	1.37312e-45
Abhd8	1.64769e-55	0.0697027	0.151	0.06	3.58454e-51
Tent5a	8.49346e-25	0.0696731	0.525	0.372	1.84775e-20
Ciao1	7.78321e-58	0.0696583	0.208	0.093	1.69324e-53
Timp2	4.64869e-12	0.0696534	0.91	0.774	1.01132e-07
Rbpms	4.27157e-13	0.0696413	0.988	0.949	9.29279e-09
Ppid	1.809e-58	0.0695646	0.29	0.145	3.93549e-54
Egln2	1.49681e-55	0.0695553	0.247	0.12	3.25631e-51
Fkbp10	2.10808e-56	0.0694881	0.264	0.13	4.58613e-52
Cers2	1.10365e-54	0.0694528	0.362	0.194	2.40099e-50
Syne1	1.69302e-22	0.0694506	0.658	0.463	3.68316e-18
Kif1bp	2.94332e-50	0.0693576	0.185	0.085	6.40318e-46
Sumo3	2.04225e-51	0.0693176	0.48	0.277	4.44292e-47
Vbp1	1.90678e-63	0.0692808	0.367	0.189	4.14821e-59
Csrp1	9.59586e-05	0.0692177	0.966	0.945	1
Nampt	4.25373e-57	0.0691982	0.311	0.161	9.25399e-53
Rae1	2.69963e-58	0.0691626	0.191	0.082	5.87304e-54
Phyh	1.45881e-62	0.0691175	0.343	0.175	3.17365e-58
Mat2a	6.69741e-35	0.0690697	0.599	0.388	1.45702e-30
Pnisr	2.60622e-39	0.0690444	0.586	0.373	5.66982e-35
Hdac3	5.47645e-55	0.0690352	0.154	0.062	1.1914e-50
Rab9	7.79725e-64	0.0688204	0.321	0.159	1.69629e-59
Ehd1	2.94449e-55	0.0688173	0.254	0.125	6.40575e-51
Cyc1	1.37179e-49	0.0687309	0.565	0.334	2.98432e-45
Safb2	3.6625e-52	0.0686843	0.189	0.086	7.96776e-48
Tapbp	1.62768e-59	0.0686798	0.321	0.164	3.54102e-55
Nkiras2	2.64868e-55	0.0684284	0.174	0.074	5.76219e-51
Dnaja2	2.87737e-50	0.0683791	0.551	0.324	6.25971e-46
Etfb	4.69811e-38	0.0681754	0.618	0.392	1.02207e-33
Mknk2	9.50146e-58	0.0681645	0.268	0.132	2.06704e-53
Fads3	8.74755e-51	0.068164	0.299	0.158	1.90303e-46
Eloc	2.34346e-33	0.0681397	0.696	0.455	5.09819e-29
Tsnax	1.68836e-64	0.0680627	0.299	0.145	3.67302e-60
Azin1	3.63475e-39	0.0680332	0.433	0.265	7.90739e-35
Bmyc	1.77182e-41	0.0680168	0.479	0.293	3.85459e-37
Ormdl3	1.04935e-53	0.0678801	0.348	0.187	2.28285e-49
Acads	7.70503e-55	0.0678381	0.215	0.1	1.67623e-50
Thoc3	4.90234e-47	0.0675569	0.147	0.063	1.0665e-42
Gamt	1.34833e-52	0.0673477	0.434	0.245	2.93328e-48
Smim12	3.48699e-56	0.0671461	0.373	0.199	7.58595e-52
Ginm1	7.65e-49	0.0671184	0.514	0.3	1.66426e-44
Galk1	9.44704e-57	0.0670395	0.22	0.101	2.0552e-52
Tmem87b	1.05863e-57	0.0670258	0.265	0.13	2.30304e-53
Calu	6.93233e-27	0.066941	0.683	0.464	1.50813e-22
Dbnl	2.34316e-61	0.0668371	0.264	0.125	5.09755e-57
Ppp4r2	1.61351e-47	0.0668317	0.502	0.296	3.51019e-43
Gpcpd1	3.15109e-50	0.0667786	0.26	0.134	6.85519e-46
Kcnj15	1.02203e-30	0.0667612	0.403	0.265	2.22343e-26
Hexim1	1.24296e-48	0.0666326	0.277	0.147	2.70405e-44
Wscd2	5.06697e-48	0.0666178	0.346	0.193	1.10232e-43
Dazap1	1.29549e-52	0.0666177	0.247	0.122	2.81833e-48
1110032A03Rik	5.31099e-58	0.0666043	0.216	0.098	1.15541e-53
Otub1	9.03684e-57	0.0666024	0.403	0.218	1.96597e-52
Zfp397	1.84791e-47	0.0663702	0.153	0.067	4.02012e-43
Pitpnb	1.5901e-56	0.0662799	0.424	0.232	3.45926e-52
Trir	7.68925e-38	0.0662608	0.613	0.384	1.6728e-33
Rbm5	2.34202e-51	0.0662079	0.407	0.23	5.09507e-47
Cd99l2	2.45537e-54	0.066083	0.258	0.128	5.34165e-50
Btbd2	4.67503e-51	0.066015	0.165	0.071	1.01705e-46
Tomm40	7.54514e-59	0.0659802	0.247	0.116	1.64145e-54
Cope	7.80224e-34	0.0659797	0.659	0.428	1.69738e-29
Tmem222	8.51999e-61	0.0659649	0.22	0.098	1.85352e-56
Coq9	2.41741e-48	0.0656861	0.149	0.063	5.25907e-44
Cd82	3.85915e-44	0.0656855	0.102	0.037	8.39559e-40
Hsd17b4	7.65145e-57	0.0654897	0.235	0.111	1.66457e-52
Col4a5	4.17982e-20	0.0653565	0.737	0.529	9.09319e-16
Arf1	9.37884e-19	0.0652507	0.858	0.658	2.04037e-14
Cct2	4.92387e-32	0.0651336	0.669	0.44	1.07119e-27
Il10rb	1.29008e-49	0.0651283	0.161	0.07	2.80656e-45
Abhd14a	5.65101e-53	0.0648713	0.216	0.102	1.22938e-48
Mfap5	0.00654087	0.0648521	0.651	0.596	1
Bod1	4.89918e-58	0.0647738	0.413	0.223	1.06582e-53
Mrpl28	2.60506e-58	0.0646319	0.364	0.192	5.66731e-54
Nsfl1c	6.1469e-61	0.0646237	0.318	0.159	1.33726e-56
Rbm4b	6.12907e-44	0.0645775	0.142	0.062	1.33338e-39
Akt1s1	8.12992e-59	0.0645672	0.247	0.117	1.76866e-54
Scp2	1.44728e-19	0.0645296	0.804	0.592	3.14856e-15
Ppp1ca	9.00089e-43	0.0645172	0.59	0.36	1.95814e-38
Map1lc3b	9.15258e-16	0.0644914	0.956	0.873	1.99114e-11
Rchy1	3.71426e-61	0.0644897	0.298	0.147	8.08038e-57
Ddx3y	8.68909e-53	0.0644809	0.219	0.104	1.89031e-48
Exoc7	3.55934e-53	0.0644432	0.192	0.087	7.74335e-49
Rsl1d1	6.47086e-54	0.0644431	0.37	0.2	1.40773e-49
Gucy1b1	6.17601e-14	0.0644387	0.835	0.662	1.34359e-09
Idh2	1.55074e-52	0.0644051	0.435	0.244	3.37364e-48
Eif4a3	1.60357e-55	0.0643643	0.357	0.19	3.48858e-51
Agpat3	6.3138e-60	0.0642812	0.231	0.106	1.37357e-55
Maged2	1.1883e-57	0.0642697	0.313	0.161	2.58514e-53
Sugt1	1.3151e-36	0.0641145	0.632	0.402	2.861e-32
Spry1	5.48748e-54	0.064092	0.159	0.066	1.1938e-49
Lamp1	8.39876e-13	0.0640701	0.953	0.845	1.82715e-08
1810026B05Rik	4.63585e-42	0.0640174	0.492	0.301	1.00853e-37
Ltbp4	2.90769e-05	0.0640151	0.929	0.821	0.632568
Dnttip1	8.81262e-53	0.0638859	0.198	0.091	1.91719e-48
Tmem30a	1.30279e-22	0.0637588	0.742	0.521	2.83422e-18
Polr2e	4.29893e-58	0.0637425	0.326	0.168	9.35231e-54
Itpk1	1.67603e-53	0.063674	0.181	0.08	3.64621e-49
Fyco1	6.21661e-53	0.06366	0.395	0.218	1.35242e-48
Lman1	2.64198e-41	0.0636072	0.479	0.289	5.74762e-37
Rftn2	2.0573e-52	0.0634691	0.45	0.255	4.47565e-48
Hmgcl	1.10445e-48	0.0634402	0.175	0.079	2.40273e-44
Wnt5a	1.20848e-37	0.0634327	0.11	0.046	2.62904e-33
Trp53	1.41793e-54	0.0633698	0.274	0.138	3.08471e-50
Taf11	3.54445e-57	0.0633524	0.256	0.124	7.71095e-53
Bag5	4.62689e-53	0.0633428	0.235	0.114	1.00658e-48
Sap30l	1.34429e-55	0.0633267	0.273	0.137	2.9245e-51
Mettl24	9.10613e-50	0.0632974	0.252	0.128	1.98104e-45
Fuz	7.15733e-49	0.0632299	0.174	0.078	1.55708e-44
Tmem33	2.08678e-51	0.0632252	0.41	0.23	4.5398e-47
Chchd3	2.41616e-54	0.063129	0.261	0.13	5.25637e-50
Tada3	6.84706e-46	0.0630964	0.14	0.059	1.48958e-41
Mrpl3	5.56859e-57	0.0630769	0.228	0.106	1.21145e-52
Tor2a	8.01074e-48	0.0630697	0.113	0.042	1.74274e-43
Tnfrsf11b	2.1044e-39	0.063046	0.181	0.093	4.57812e-35
Exosc3	1.88539e-57	0.0629167	0.19	0.082	4.10167e-53
Lamtor1	5.81991e-58	0.0629155	0.409	0.22	1.26612e-53
Uba5	9.10987e-55	0.0628263	0.326	0.17	1.98185e-50
Pigk	9.79328e-55	0.0628239	0.249	0.122	2.13053e-50
Plxdc2	3.76644e-36	0.0628232	0.539	0.342	8.19388e-32
Lap3	1.7207e-61	0.0628105	0.224	0.101	3.74338e-57
Arl13b	1.94842e-50	0.0627978	0.278	0.145	4.2388e-46
Bckdk	3.95445e-49	0.06272	0.198	0.094	8.6029e-45
Vdac1	8.24772e-33	0.0626396	0.666	0.431	1.79429e-28
Psme4	6.17878e-45	0.0626287	0.31	0.172	1.34419e-40
Blmh	1.95719e-52	0.0626104	0.375	0.207	4.25786e-48
Dld	7.01771e-59	0.0625949	0.276	0.135	1.5267e-54
Sfpq	1.8187e-35	0.0624849	0.539	0.341	3.95658e-31
Sh3glb2	3.28183e-49	0.0624757	0.225	0.111	7.13962e-45
Scfd1	1.27754e-53	0.0624618	0.301	0.157	2.7793e-49
Rit1	2.71673e-54	0.0623715	0.278	0.141	5.91025e-50
Ube2h	1.22721e-44	0.0622929	0.527	0.317	2.66979e-40
Lcmt1	9.00462e-56	0.0622367	0.203	0.092	1.95895e-51
Prkcsh	2.4455e-52	0.0621956	0.243	0.12	5.32019e-48
Higd1a	4.7828e-11	0.0620779	0.849	0.689	1.0405e-06
Cyfip1	1.00356e-47	0.0620182	0.408	0.233	2.18323e-43
Akr7a5	2.22326e-54	0.0619944	0.203	0.092	4.83671e-50
Pkd2	6.75096e-54	0.0619651	0.308	0.162	1.46867e-49
Pdzd11	5.16203e-63	0.0619297	0.294	0.143	1.123e-58
Lman2l	1.47604e-48	0.0618775	0.144	0.06	3.21113e-44
Smu1	4.13233e-58	0.0618661	0.286	0.142	8.98989e-54
Cdon	2.73411e-37	0.0618328	0.134	0.062	5.94806e-33
Relb	6.16586e-48	0.0617842	0.136	0.055	1.34138e-43
Arl3	7.9704e-42	0.0617695	0.594	0.362	1.73396e-37
2610001J05Rik	6.72612e-58	0.061645	0.462	0.254	1.46327e-53
Ssrp1	7.02414e-53	0.0616396	0.32	0.168	1.5281e-48
Heyl	5.39814e-32	0.0615773	0.563	0.37	1.17436e-27
Glipr2	6.25038e-49	0.0615436	0.109	0.039	1.35977e-44
BC005624	2.51607e-53	0.061488	0.434	0.242	5.47371e-49
Acadm	1.40691e-38	0.0614748	0.586	0.367	3.06073e-34
Txn2	6.50207e-51	0.061438	0.49	0.28	1.41453e-46
Jph2	2.53321e-42	0.0614193	0.481	0.289	5.51101e-38
Idh3g	1.43398e-50	0.0614186	0.453	0.257	3.11961e-46
Jmjd8	1.16235e-50	0.0613903	0.186	0.085	2.5287e-46
Prr13	3.25579e-51	0.0613298	0.364	0.2	7.08297e-47
Krit1	7.91674e-46	0.0612245	0.375	0.214	1.72229e-41
Pygb	4.2891e-52	0.0612116	0.264	0.134	9.33093e-48
Ldlrad4	1.24222e-47	0.0611213	0.22	0.109	2.70245e-43
Isyna1	1.22268e-51	0.0610851	0.272	0.14	2.65993e-47
Cyp2d22	1.82121e-41	0.061084	0.108	0.042	3.96204e-37
Timm21	3.06371e-52	0.061064	0.2	0.092	6.66511e-48
Glod4	8.36652e-58	0.061016	0.248	0.118	1.82014e-53
Lsm2	2.16567e-52	0.0609976	0.245	0.121	4.71141e-48
Fhl2	1.44681e-40	0.0609243	0.107	0.042	3.14753e-36
Trps1	1.55467e-54	0.0608709	0.297	0.154	3.38219e-50
Srp9	2.11106e-31	0.0608105	0.679	0.448	4.59261e-27
Sigmar1	7.92995e-46	0.060713	0.171	0.079	1.72516e-41
Med28	2.69933e-39	0.0606901	0.621	0.386	5.87239e-35
Prr14	3.07063e-47	0.0606686	0.142	0.06	6.68016e-43
Chic2	5.31395e-53	0.0606347	0.357	0.193	1.15605e-48
Lrrc8a	2.73424e-54	0.0605701	0.425	0.237	5.94833e-50
Taz	4.12971e-41	0.0604219	0.158	0.074	8.98418e-37
Tspan31	2.17105e-54	0.0603837	0.326	0.172	4.72313e-50
Ubald2	1.78166e-57	0.0603249	0.376	0.201	3.876e-53
Tmtc1	1.90958e-45	0.0602631	0.385	0.221	4.15429e-41
Mcl1	2.81127e-28	0.0602434	0.704	0.49	6.11592e-24
Egln1	1.31993e-53	0.060223	0.401	0.22	2.87151e-49
Igsf3	4.73147e-46	0.0601872	0.214	0.107	1.02933e-41
Pea15a	6.00215e-48	0.0601736	0.46	0.268	1.30577e-43
Phkg1	3.90175e-43	0.0601245	0.151	0.068	8.48826e-39
Pbx3	2.81845e-42	0.0600048	0.125	0.052	6.13153e-38
Arpc4	1.56192e-47	0.0599807	0.537	0.317	3.39795e-43
Oaz2	1.48966e-57	0.0599302	0.345	0.182	3.24077e-53
Fam173a	1.87766e-59	0.0599254	0.358	0.187	4.08484e-55
Mustn1	2.28695e-08	0.0598814	0.874	0.777	0.000497525
Kctd10	6.33815e-38	0.0598808	0.59	0.372	1.37886e-33
Zranb1	8.55849e-50	0.0597729	0.342	0.187	1.8619e-45
Clpx	2.20779e-53	0.0597652	0.227	0.109	4.80304e-49
Anp32a	6.91923e-34	0.0597287	0.659	0.431	1.50528e-29
Setd3	3.53123e-55	0.0596672	0.456	0.254	7.68218e-51
Btbd1	5.94981e-52	0.0594585	0.183	0.082	1.29438e-47
Dnajc4	2.78612e-49	0.0594398	0.33	0.178	6.06121e-45
Meis1	4.71993e-52	0.0594357	0.201	0.093	1.02682e-47
Gaa	1.63599e-48	0.0593794	0.266	0.139	3.55911e-44
Dusp1	5.28189e-07	0.0593742	0.806	0.701	0.0114908
Sec22b	1.46218e-50	0.059359	0.393	0.219	3.18098e-46
Ppfibp1	5.99577e-51	0.0593527	0.379	0.21	1.30438e-46
Asna1	2.45769e-56	0.0593255	0.23	0.108	5.34671e-52
Tesk1	1.09781e-55	0.0591999	0.255	0.124	2.38828e-51
H2afz	1.07499e-20	0.0591882	0.78	0.568	2.33863e-16
Anapc7	8.52617e-46	0.0591172	0.369	0.211	1.85487e-41
Nrtn	9.92625e-47	0.0591042	0.294	0.162	2.15946e-42
Mgll	4.76334e-42	0.0590837	0.503	0.304	1.03627e-37
Ctnnal1	5.9395e-39	0.0590549	0.166	0.081	1.29214e-34
Syngr2	1.70777e-50	0.0589849	0.403	0.226	3.71525e-46
Copz2	1.74628e-39	0.0589842	0.613	0.384	3.79902e-35
Klc3	1.11067e-44	0.0589494	0.139	0.059	2.41627e-40
Tmem120a	2.86303e-44	0.058926	0.154	0.07	6.22851e-40
Myo9a	6.53246e-45	0.0588863	0.325	0.183	1.42114e-40
Ifi35	3.61016e-58	0.0588667	0.228	0.105	7.85389e-54
Spg21	1.79245e-55	0.0587536	0.208	0.095	3.89947e-51
Rap1b	1.21684e-35	0.0587448	0.571	0.359	2.64724e-31
Psmd11	8.56517e-50	0.0587256	0.52	0.304	1.86335e-45
Ubn1	3.03527e-53	0.0586984	0.304	0.159	6.60323e-49
Vwa5a	1.31027e-47	0.0586835	0.277	0.147	2.85048e-43
Fh1	1.2059e-55	0.0586417	0.297	0.151	2.62344e-51
Trip10	9.12258e-56	0.0586305	0.302	0.155	1.98462e-51
Maob	2.55132e-41	0.0586304	0.338	0.196	5.5504e-37
Sort1	2.79868e-48	0.0586013	0.27	0.142	6.08852e-44
Txndc12	4.1231e-58	0.0585937	0.216	0.098	8.9698e-54
Ric8a	2.29977e-43	0.0585783	0.135	0.058	5.00315e-39
Gemin7	1.30325e-51	0.0585775	0.491	0.278	2.83522e-47
Derl2	3.23274e-53	0.0584924	0.286	0.146	7.03282e-49
Slc35b2	3.41936e-50	0.0584395	0.162	0.07	7.43882e-46
Ccnq	2.72516e-46	0.0583683	0.156	0.069	5.92859e-42
Nid1	5.62627e-37	0.0583628	0.118	0.052	1.22399e-32
Luc7l2	7.77711e-26	0.0583234	0.698	0.478	1.69191e-21
Pmpcb	8.1084e-57	0.0583122	0.325	0.167	1.76398e-52
Ccdc12	8.54729e-53	0.0583043	0.424	0.235	1.85946e-48
Taldo1	1.42417e-35	0.0582139	0.642	0.409	3.09829e-31
Gas1	6.57422e-43	0.0582098	0.298	0.168	1.43022e-38
Neo1	3.03994e-37	0.0581949	0.46	0.284	6.61339e-33
Chpt1	2.70464e-27	0.0581196	0.7	0.475	5.88394e-23
Hectd1	1.37884e-49	0.0580566	0.406	0.229	2.99967e-45
Mvp	4.67053e-51	0.0580159	0.173	0.076	1.01607e-46
Wnk1	6.49838e-31	0.0579524	0.629	0.416	1.41372e-26
Eva1b	4.89485e-34	0.0578554	0.642	0.425	1.06487e-29
Uchl1	2.1428e-24	0.057855	0.624	0.441	4.66165e-20
Tiparp	1.72029e-27	0.0578241	0.181	0.104	3.74249e-23
Triap1	9.66767e-54	0.0577714	0.22	0.104	2.1032e-49
Cdkn1a	2.89137e-20	0.0577024	0.438	0.313	6.29018e-16
Gng12	4.17595e-31	0.057584	0.665	0.437	9.08479e-27
Mpp7	2.66533e-37	0.0575755	0.363	0.218	5.79843e-33
Mlycd	2.96333e-42	0.0575552	0.123	0.051	6.44672e-38
Ngly1	4.60999e-52	0.0574589	0.195	0.089	1.0029e-47
Plxnb2	6.79999e-46	0.0573792	0.223	0.113	1.47934e-41
Rragc	4.31845e-55	0.0573751	0.258	0.126	9.39478e-51
Immp1l	1.78281e-51	0.0572846	0.492	0.279	3.87849e-47
Nup54	2.75426e-48	0.0572686	0.163	0.072	5.99189e-44
Hbegf	3.78327e-18	0.057266	0.469	0.339	8.23051e-14
Ube2r2	5.39933e-28	0.0572056	0.685	0.462	1.17462e-23
Smo	5.57793e-47	0.0570538	0.161	0.072	1.21348e-42
Ppic	3.30355e-49	0.0569871	0.335	0.182	7.18687e-45
Eva1c	4.26234e-45	0.0569758	0.184	0.088	9.27273e-41
Bloc1s4	3.11725e-46	0.0569556	0.178	0.083	6.78157e-42
Timm17a	2.51008e-51	0.0569422	0.516	0.296	5.46067e-47
Dusp28	5.24136e-43	0.0569096	0.11	0.042	1.14026e-38
Rela	3.31584e-49	0.0568325	0.324	0.175	7.2136e-45
Adprh	7.5235e-52	0.0568243	0.26	0.131	1.63674e-47
Aen	7.94008e-47	0.056778	0.124	0.049	1.72736e-42
Hsd17b10	9.44833e-44	0.056775	0.573	0.346	2.05548e-39
Rnf13	2.94992e-54	0.0567154	0.305	0.158	6.41755e-50
Vwc2	3.43966e-33	0.0566741	0.184	0.1	7.48298e-29
Setd6	2.71326e-43	0.0566659	0.153	0.07	5.9027e-39
Uap1	3.71059e-41	0.0566465	0.211	0.109	8.07238e-37
Plvap	7.33446e-45	0.0565137	0.2	0.099	1.59561e-40
Swap70	6.40319e-37	0.0564949	0.167	0.084	1.39301e-32
Dab2ip	4.43939e-47	0.05643	0.341	0.189	9.65788e-43
Tbcc	3.50703e-44	0.0564225	0.155	0.07	7.62955e-40
Sumo1	1.9675e-42	0.0564066	0.6	0.364	4.28031e-38
Foxs1	1.26643e-39	0.0563521	0.213	0.113	2.75511e-35
Ddhd2	1.0148e-48	0.0563137	0.232	0.116	2.20769e-44
Arl4d	2.95767e-37	0.0563082	0.146	0.07	6.4344e-33
Trip6	3.55194e-52	0.0562931	0.205	0.095	7.72725e-48
Ccnl2	1.8867e-46	0.0562759	0.333	0.185	4.10451e-42
Atp1b1	1.07728e-30	0.0562481	0.182	0.102	2.34362e-26
Ndufa10	7.31654e-47	0.0561906	0.5	0.293	1.59171e-42
Ppil2	3.6736e-52	0.0561854	0.216	0.103	7.99191e-48
Etfbkmt	8.46598e-43	0.056125	0.106	0.041	1.84177e-38
Atp5c1	3.38978e-17	0.0560752	0.847	0.661	7.37446e-13
Stx12	2.56799e-59	0.0560698	0.325	0.166	5.58667e-55
Edf1	1.63177e-15	0.0560207	0.875	0.693	3.54991e-11
Anapc5	4.06999e-51	0.0559744	0.434	0.244	8.85426e-47
Mff	2.08926e-51	0.0559626	0.451	0.254	4.54518e-47
Rxrb	4.35001e-44	0.055961	0.169	0.079	9.46344e-40
Lsm10	5.48825e-48	0.0559181	0.227	0.113	1.19397e-43
Snx21	1.28119e-45	0.0559116	0.143	0.061	2.78722e-41
Impdh2	2.03945e-52	0.0558946	0.348	0.187	4.43683e-48
Tmod3	5.10535e-46	0.0558436	0.308	0.169	1.11067e-41
Dbndd2	6.18395e-31	0.0558122	0.681	0.444	1.34532e-26
Dnpep	6.21293e-50	0.0557888	0.233	0.115	1.35162e-45
Nr3c1	9.26896e-31	0.0557875	0.637	0.422	2.01646e-26
Rbm7	1.25962e-58	0.0557376	0.338	0.175	2.7403e-54
C1galt1c1	3.19397e-51	0.0556997	0.229	0.111	6.94848e-47
Trappc3	4.46824e-56	0.0556891	0.31	0.158	9.72065e-52
Arhgap5	6.4105e-27	0.0556604	0.67	0.455	1.3946e-22
Gsdme	6.45784e-38	0.0556182	0.127	0.057	1.4049e-33
Aida	3.38509e-50	0.0556164	0.253	0.129	7.36426e-46
Ankrd17	8.49394e-44	0.0555957	0.323	0.182	1.84786e-39
Tcn2	1.28667e-44	0.055511	0.164	0.076	2.79915e-40
Tmem230	3.67775e-43	0.0555097	0.138	0.06	8.00095e-39
Rnf130	1.24637e-53	0.0554871	0.369	0.199	2.71148e-49
Rps7	1.38651e-16	0.0554849	0.977	0.988	3.01635e-12
Hmgxb4	1.00639e-48	0.0554819	0.212	0.103	2.18941e-44
Ppp5c	6.19773e-48	0.0554469	0.197	0.094	1.34832e-43
Rnd2	2.75754e-47	0.0554009	0.237	0.12	5.99903e-43
Aspscr1	5.18312e-41	0.055377	0.114	0.046	1.12759e-36
Dexi	1.36821e-47	0.0553389	0.151	0.065	2.97653e-43
Pde4b	1.96318e-26	0.0552583	0.531	0.366	4.27091e-22
Prkag1	2.28028e-51	0.0552543	0.26	0.131	4.96074e-47
Aff2	3.08084e-36	0.0552433	0.143	0.069	6.70238e-32
Papss1	4.27019e-48	0.05524	0.193	0.091	9.2898e-44
Il1r1	2.20146e-48	0.0551765	0.267	0.14	4.78927e-44
Sync	2.74101e-50	0.0550247	0.239	0.119	5.96307e-46
Col4a2	6.77854e-08	0.0550068	0.796	0.621	0.00147467
Gm26802	3.61966e-26	0.0549321	0.131	0.07	7.87456e-22
Adamtsl5	6.78752e-49	0.0549312	0.358	0.198	1.47662e-44
Oard1	9.07478e-55	0.0548613	0.328	0.172	1.97422e-50
Gnb5	6.72203e-41	0.0548472	0.106	0.041	1.46238e-36
Hnrnph3	1.14835e-52	0.0548265	0.456	0.256	2.49823e-48
Fance	3.17519e-48	0.0547886	0.161	0.071	6.90762e-44
C030006K11Rik	8.99972e-46	0.0547613	0.12	0.047	1.95789e-41
Cdkn2d	2.23198e-45	0.054744	0.184	0.088	4.85567e-41
Dync2li1	4.52965e-49	0.0547061	0.15	0.063	9.85426e-45
Marc2	5.93654e-47	0.0546502	0.464	0.268	1.2915e-42
Sox5	2.78625e-39	0.0546172	0.114	0.048	6.06149e-35
Tmed10	4.60402e-15	0.054606	0.829	0.633	1.0016e-10
Sesn3	2.82702e-53	0.0545542	0.295	0.153	6.15018e-49
Napa	1.95769e-53	0.0544949	0.405	0.223	4.25896e-49
Nudt21	1.0143e-55	0.0544933	0.296	0.15	2.20662e-51
Rnase4	2.36461e-44	0.0544717	0.375	0.216	5.14421e-40
Fbxw5	1.59292e-46	0.0544511	0.162	0.072	3.46539e-42
Anapc16	4.95956e-54	0.0543691	0.447	0.248	1.07895e-49
Fis1	1.62038e-25	0.0543137	0.71	0.482	3.52514e-21
Mrps17	6.47967e-55	0.0542215	0.409	0.224	1.40965e-50
Mzt1	4.13958e-51	0.0542099	0.217	0.104	9.00566e-47
Phax	5.31981e-53	0.0541459	0.319	0.167	1.15732e-48
Man2a2	2.69345e-39	0.0541381	0.133	0.06	5.8596e-35
Zbtb8os	7.46411e-48	0.0540925	0.258	0.134	1.62382e-43
Ubxn1	2.05591e-23	0.054078	0.749	0.527	4.47264e-19
Acot9	2.27281e-51	0.0540536	0.303	0.159	4.94451e-47
Agpat4	7.07676e-45	0.0540358	0.132	0.055	1.53955e-40
Ccng1	1.60339e-47	0.0540345	0.253	0.131	3.48818e-43
Mrc2	1.06695e-41	0.0539643	0.124	0.052	2.32115e-37
Tmem147	7.96912e-53	0.0539583	0.424	0.234	1.73368e-48
Dlst	9.34117e-49	0.0539465	0.191	0.089	2.03217e-44
Tmem205	1.26412e-48	0.0539323	0.35	0.194	2.75009e-44
Erp44	1.17105e-58	0.0538951	0.352	0.182	2.54763e-54
Mafg	5.20442e-47	0.0538255	0.224	0.112	1.13222e-42
Camk2n1	1.99738e-24	0.0537779	0.714	0.502	4.34531e-20
Flywch1	1.20226e-47	0.053768	0.171	0.078	2.61552e-43
Bcam	3.03614e-08	0.0537431	0.836	0.692	0.000660511
Map2k2	1.80547e-49	0.0537339	0.488	0.281	3.92781e-45
Rev3l	8.98783e-42	0.0536875	0.195	0.098	1.9553e-37
Golim4	4.17109e-14	0.05368	0.78	0.6	9.0742e-10
Numa1	1.50676e-51	0.0536663	0.251	0.126	3.27795e-47
Cystm1	3.28644e-53	0.0535895	0.385	0.211	7.14965e-49
4930523C07Rik	6.63555e-14	0.053587	0.874	0.702	1.44356e-09
Tubb4b	1.92022e-21	0.053506	0.668	0.473	4.17744e-17
Pofut2	5.75377e-42	0.0534553	0.571	0.348	1.25173e-37
Clec2d	3.04991e-35	0.0533837	0.135	0.064	6.63507e-31
Ppp1r37	9.65333e-48	0.0533802	0.167	0.075	2.10008e-43
Col18a1	0.00516302	0.0533708	0.941	0.864	1
Ctdspl	2.29835e-49	0.0533555	0.388	0.216	5.00006e-45
Pdrg1	8.54054e-56	0.0533318	0.381	0.204	1.858e-51
Lonp2	9.12578e-50	0.0532923	0.313	0.167	1.98531e-45
Mosmo	2.52655e-49	0.0532723	0.443	0.254	5.49651e-45
Pqlc1	6.45935e-43	0.0531902	0.116	0.046	1.40523e-38
Dipk1a	8.59055e-41	0.0531447	0.109	0.043	1.86887e-36
Nup98	4.62026e-44	0.0531377	0.296	0.163	1.00514e-39
Drg1	3.25009e-46	0.0530995	0.241	0.124	7.07058e-42
Trabd	2.85207e-44	0.053095	0.118	0.047	6.20467e-40
Tm2d3	1.06001e-49	0.0530567	0.392	0.217	2.30606e-45
Zfp280d	6.62539e-47	0.0530516	0.277	0.147	1.44135e-42
Bccip	5.45593e-50	0.0530021	0.45	0.254	1.18694e-45
Tmem246	5.58935e-43	0.0530016	0.137	0.06	1.21596e-38
Antxr2	1.96307e-42	0.0529813	0.154	0.071	4.27067e-38
Asah1	4.45306e-40	0.0529368	0.499	0.301	9.68762e-36
Pdzd2	1.35961e-39	0.0529312	0.242	0.132	2.95784e-35
Ace	8.92082e-23	0.0528572	0.413	0.282	1.94072e-18
Wipi1	2.71495e-50	0.0527439	0.239	0.119	5.90637e-46
Selenop	1.07555e-17	0.0527333	0.733	0.537	2.33986e-13
Commd7	4.34494e-54	0.0527096	0.285	0.144	9.45241e-50
Phf3	6.04838e-45	0.0526974	0.358	0.203	1.31583e-40
Stk16	1.00177e-52	0.0526832	0.326	0.171	2.17935e-48
Tor1b	7.88498e-48	0.0526385	0.318	0.173	1.71538e-43
Eid2	3.83111e-40	0.052577	0.114	0.047	8.33458e-36
Mgat1	4.32294e-45	0.052496	0.186	0.089	9.40456e-41
Adamts2	1.44506e-47	0.0524481	0.275	0.145	3.14373e-43
Smarcd3	1.05746e-38	0.0524376	0.584	0.364	2.30051e-34
Srek1	4.18926e-49	0.0524054	0.329	0.18	9.11373e-45
Sptssa	1.27947e-33	0.0524011	0.615	0.392	2.78348e-29
Tmem11	1.06557e-52	0.0523817	0.234	0.113	2.31816e-48
Tead3	1.75355e-54	0.0523112	0.259	0.128	3.81484e-50
Lsm1	1.65872e-58	0.0523077	0.296	0.146	3.60854e-54
Ash1l	4.34646e-24	0.052178	0.664	0.456	9.45573e-20
Chd2	5.01331e-44	0.0520531	0.275	0.151	1.09065e-39
Tmem115	2.12726e-45	0.0520405	0.152	0.067	4.62786e-41
St6galnac4	3.2789e-39	0.0519272	0.109	0.044	7.13324e-35
Jagn1	2.40303e-54	0.0519119	0.263	0.13	5.22778e-50
Rdh14	3.46568e-53	0.0519116	0.199	0.091	7.53958e-49
Cdk5	7.00583e-45	0.0518629	0.181	0.086	1.52412e-40
Ptpn2	1.05536e-52	0.0518161	0.297	0.155	2.29594e-48
Jmjd6	1.75627e-50	0.051754	0.207	0.098	3.82076e-46
Nabp2	2.74631e-57	0.0517532	0.311	0.158	5.97459e-53
Tgfb1i1	5.74101e-19	0.0516991	0.806	0.596	1.24896e-14
Vgll4	1.36917e-46	0.0516874	0.197	0.095	2.97863e-42
Sptbn1	5.66465e-12	0.0516714	0.775	0.598	1.23234e-07
Pfdn5	2.48982e-14	0.0516656	0.948	0.904	5.41661e-10
Msx1	1.50935e-42	0.0516136	0.127	0.053	3.28358e-38
Ccs	7.37875e-52	0.0515842	0.325	0.172	1.60525e-47
Bcas2	1.05909e-42	0.0514776	0.513	0.304	2.30404e-38
Cops8	5.94793e-53	0.0514654	0.374	0.203	1.29397e-48
Chpf	6.9998e-46	0.0514344	0.253	0.133	1.52281e-41
Zfp644	1.52941e-40	0.051419	0.504	0.307	3.32724e-36
Rilpl2	5.35076e-46	0.0513754	0.124	0.049	1.16406e-41
Pmepa1	5.79821e-06	0.0513716	0.993	0.972	0.12614
Wbp2	1.85179e-44	0.0512842	0.432	0.251	4.02858e-40
Tbc1d17	6.36519e-41	0.0512748	0.145	0.066	1.38475e-36
Pdgfd	1.20524e-40	0.051245	0.426	0.253	2.622e-36
Med9	3.44245e-50	0.0512412	0.222	0.107	7.48904e-46
Nr4a2	5.80062e-25	0.0512395	0.268	0.173	1.26193e-20
Ostc	1.27766e-38	0.051223	0.596	0.366	2.77954e-34
Polr2a	4.18784e-37	0.0512104	0.265	0.15	9.11064e-33
Btbd9	7.35666e-44	0.0511864	0.137	0.059	1.60044e-39
Ctbp2	2.5571e-49	0.0509415	0.165	0.073	5.56296e-45
Babam2	4.37096e-48	0.0508871	0.212	0.103	9.50903e-44
Snx7	6.0314e-50	0.0508598	0.187	0.086	1.31213e-45
BC005561	4.84872e-49	0.0508513	0.251	0.128	1.05484e-44
Dapk3	2.3467e-54	0.0507742	0.272	0.136	5.10524e-50
Mast4	2.42942e-28	0.0507684	0.606	0.402	5.28521e-24
Arf2	7.3654e-49	0.0507658	0.223	0.11	1.60234e-44
Taf15	6.87028e-50	0.050765	0.268	0.138	1.49463e-45
Chek2	1.23809e-35	0.0507315	0.121	0.055	2.69346e-31
Ndufa8	9.86412e-33	0.0507092	0.669	0.428	2.14594e-28
Cbr3	8.47081e-41	0.0506697	0.123	0.052	1.84283e-36
Vps13b	2.90243e-41	0.0506648	0.158	0.074	6.31424e-37
Naa20	1.21003e-57	0.0505898	0.297	0.149	2.63242e-53
Axl	1.95721e-30	0.0505832	0.611	0.399	4.2579e-26
Gpx8	6.16952e-35	0.0504888	0.587	0.375	1.34218e-30
Tceal1	8.89151e-54	0.0504535	0.215	0.1	1.93435e-49
Cdk12	5.13264e-42	0.0504289	0.308	0.174	1.11661e-37
Tmem132a	7.39627e-32	0.0504122	0.133	0.066	1.60906e-27
Supt4a	4.17615e-54	0.0504105	0.438	0.239	9.08521e-50
Nop56	1.23534e-46	0.050372	0.274	0.146	2.68749e-42
Dtnbp1	2.30772e-51	0.0503418	0.231	0.113	5.02043e-47
Rce1	7.25614e-47	0.0502985	0.157	0.069	1.57857e-42
Slc16a9	5.58034e-37	0.0502421	0.102	0.041	1.214e-32
Faap20	8.50208e-53	0.0502146	0.311	0.162	1.84963e-48
Samd1	2.21219e-40	0.0501373	0.148	0.068	4.81262e-36
Emc3	1.81332e-45	0.0500778	0.43	0.249	3.94488e-41
Mllt3	4.47044e-43	0.0500575	0.238	0.125	9.72544e-39
Pacsin2	2.18701e-46	0.0499805	0.444	0.259	4.75784e-42
Urod	3.96206e-49	0.0499789	0.226	0.111	8.61945e-45
Chmp2b	3.00896e-51	0.0499697	0.416	0.232	6.54598e-47
Pcbp4	5.62531e-45	0.0499645	0.16	0.073	1.22379e-40
Ifi27	9.50776e-16	0.0498741	0.855	0.663	2.06841e-11
Zwint	4.16642e-50	0.0498704	0.246	0.124	9.06404e-46
Dpm1	1.48793e-38	0.0498498	0.605	0.371	3.237e-34
Ctsa	9.42442e-45	0.0497254	0.475	0.279	2.05028e-40
Emp2	2.53299e-21	0.04969	0.714	0.498	5.51053e-17
Syde1	2.07326e-39	0.0496841	0.144	0.066	4.51037e-35
Spns1	1.47385e-40	0.0496802	0.123	0.052	3.20636e-36
N4bp1	3.36223e-44	0.0496536	0.145	0.064	7.31453e-40
Psma5	9.54951e-37	0.0496469	0.622	0.391	2.0775e-32
Map2k1	1.06114e-51	0.0495482	0.24	0.119	2.30852e-47
Prdx3	6.92572e-52	0.0495132	0.293	0.151	1.50669e-47
Retreg2	5.28095e-46	0.0495064	0.163	0.073	1.14887e-41
Ltbr	1.12596e-47	0.0494759	0.15	0.065	2.44953e-43
Ptpn1	1.42019e-46	0.0494509	0.216	0.107	3.08963e-42
Bcl2l1	2.48268e-46	0.0493462	0.194	0.093	5.40107e-42
Ap2s1	3.79854e-44	0.0492812	0.541	0.319	8.26373e-40
Cdc123	2.77253e-53	0.0492425	0.294	0.15	6.03165e-49
Hnrnph1	4.62916e-23	0.0491755	0.689	0.471	1.00707e-18
Vegfb	4.86954e-50	0.0491738	0.423	0.238	1.05937e-45
Creb3	2.6397e-50	0.0491062	0.282	0.146	5.74266e-46
Stard10	8.19866e-41	0.0489562	0.121	0.051	1.78362e-36
Sgca	4.16374e-49	0.0489443	0.237	0.119	9.05823e-45
Ascc3	2.8397e-43	0.0489406	0.26	0.14	6.17777e-39
Paip2	4.292e-16	0.0489321	0.853	0.656	9.33725e-12
Uck1	1.15823e-36	0.0489262	0.106	0.044	2.51973e-32
Adrm1	7.80778e-52	0.0489192	0.374	0.203	1.69858e-47
Tmx2	2.50554e-45	0.0488913	0.178	0.084	5.45079e-41
Glg1	4.19452e-21	0.0488503	0.625	0.436	9.12517e-17
Mri1	1.38721e-37	0.0488387	0.123	0.054	3.01788e-33
Amfr	4.31108e-51	0.0487746	0.308	0.163	9.37875e-47
Dnajc7	5.32504e-50	0.0487746	0.235	0.117	1.15846e-45
Klhl7	4.31947e-46	0.0487073	0.338	0.188	9.397e-42
Ethe1	8.761e-45	0.0486843	0.482	0.283	1.90596e-40
Thyn1	9.68795e-48	0.0485943	0.189	0.088	2.10761e-43
Acat1	1.47937e-41	0.0485493	0.525	0.317	3.21838e-37
Preb	2.49288e-41	0.0485089	0.153	0.07	5.42326e-37
D030056L22Rik	3.51909e-46	0.0485003	0.146	0.063	7.65579e-42
Myo6	8.55388e-36	0.0484771	0.134	0.063	1.8609e-31
Hipk2	1.47273e-43	0.0484713	0.18	0.087	3.20391e-39
Mapk8ip3	6.0164e-41	0.0483894	0.168	0.081	1.30887e-36
Pja1	8.56358e-44	0.0482892	0.188	0.091	1.86301e-39
Ube2l3	6.1234e-39	0.0482827	0.594	0.367	1.33215e-34
Vps72	9.59353e-48	0.0482682	0.183	0.085	2.08707e-43
Cept1	8.02275e-53	0.0482664	0.212	0.099	1.74535e-48
Ndufv2	3.40269e-32	0.0482187	0.627	0.402	7.40256e-28
Rnf34	1.85982e-49	0.0482186	0.168	0.074	4.04604e-45
Prdx5	9.60843e-28	0.0481428	0.703	0.477	2.09031e-23
Rps5	2.53022e-13	0.0481385	0.975	0.986	5.5045e-09
Asb2	4.29261e-46	0.0481056	0.33	0.184	9.33857e-42
Nadk2	4.45028e-37	0.0480488	0.106	0.044	9.68158e-33
Card19	4.33969e-49	0.0480459	0.473	0.271	9.44099e-45
Sae1	8.48604e-49	0.0480069	0.284	0.148	1.84614e-44
Lysmd2	5.41422e-43	0.0479689	0.163	0.076	1.17786e-38
Ankrd10	6.60505e-49	0.0479511	0.278	0.146	1.43693e-44
Slc6a8	1.37738e-39	0.0479068	0.16	0.077	2.99648e-35
U2af1	2.19642e-35	0.0478903	0.647	0.409	4.77831e-31
Mrps30	4.29819e-43	0.0478642	0.14	0.061	9.35072e-39
B4galt3	1.90746e-41	0.0478443	0.122	0.051	4.14968e-37
Ifitm10	1.51149e-33	0.0478057	0.111	0.05	3.28825e-29
Rbmxl1	2.44742e-50	0.0477985	0.195	0.09	5.32436e-46
Ngrn	2.30303e-42	0.0477303	0.177	0.085	5.01023e-38
Cpq	1.64796e-18	0.0477301	0.778	0.564	3.58513e-14
Ltbp3	5.8613e-30	0.0477241	0.565	0.366	1.27513e-25
Ube2g1	1.78226e-48	0.0476336	0.316	0.17	3.8773e-44
Mydgf	1.6395e-52	0.0475781	0.48	0.27	3.56674e-48
Mrpl24	2.48195e-49	0.0475612	0.482	0.275	5.39948e-45
Psmb10	1.00599e-41	0.0475509	0.142	0.063	2.18854e-37
5031425E22Rik	2.11234e-40	0.0475454	0.15	0.07	4.5954e-36
Rab5c	8.25333e-50	0.0475422	0.369	0.202	1.79551e-45
R3hdm4	8.30558e-46	0.0475301	0.276	0.147	1.80688e-41
Heca	2.45684e-48	0.0475164	0.419	0.238	5.34485e-44
Tmem63a	1.01808e-39	0.0474426	0.19	0.096	2.21483e-35
Dram2	4.55538e-42	0.0474305	0.134	0.058	9.91023e-38
Ptprd	2.23075e-22	0.0473402	0.521	0.357	4.853e-18
Tfdp2	2.49657e-46	0.0473033	0.27	0.143	5.43129e-42
Tmem38b	1.0829e-38	0.0472924	0.533	0.327	2.35585e-34
Akirin2	1.00537e-42	0.0472848	0.48	0.287	2.18718e-38
Maea	5.99627e-51	0.0472746	0.221	0.107	1.30449e-46
Qars	1.01358e-46	0.047252	0.17	0.078	2.20504e-42
Cox19	2.31314e-53	0.047241	0.297	0.153	5.03224e-49
Aggf1	1.07133e-42	0.0472284	0.171	0.081	2.33068e-38
Eif3m	1.48871e-30	0.0472075	0.691	0.455	3.23869e-26
Gfra4	7.77822e-44	0.0471784	0.193	0.095	1.69215e-39
Ankrd44	3.35645e-32	0.0471672	0.118	0.055	7.30195e-28
Tax1bp1	1.31517e-12	0.0471247	0.864	0.672	2.86115e-08
Cuedc2	1.18913e-45	0.0471046	0.494	0.29	2.58695e-41
Fam129a	1.67247e-13	0.047078	0.751	0.564	3.63845e-09
Dhrs7b	1.08925e-37	0.046982	0.11	0.046	2.36967e-33
Dmtf1	1.21472e-35	0.0468742	0.152	0.075	2.64262e-31
Acp1	4.19032e-34	0.0468422	0.585	0.37	9.11604e-30
Zfp950	7.97618e-41	0.0467991	0.208	0.108	1.73522e-36
Nit2	1.33356e-40	0.0467886	0.13	0.057	2.90117e-36
Ddx39b	2.12009e-40	0.0467885	0.55	0.337	4.61226e-36
Ppie	7.19391e-48	0.0467881	0.311	0.167	1.56503e-43
Ddah2	1.50081e-42	0.0467855	0.372	0.215	3.26501e-38
Ptgs2	2.20298e-13	0.0467833	0.108	0.068	4.79259e-09
Ankrd54	8.75961e-40	0.0466981	0.124	0.054	1.90565e-35
Ssbp4	3.22048e-50	0.0466473	0.275	0.142	7.00615e-46
Emg1	2.44258e-49	0.0465429	0.453	0.256	5.31382e-45
Slc38a10	3.77178e-44	0.0464998	0.175	0.083	8.2055e-40
Mageh1	2.85722e-42	0.0464598	0.156	0.072	6.21588e-38
Ilf2	1.21087e-48	0.0464574	0.288	0.152	2.63424e-44
Hat1	1.3679e-40	0.0464233	0.146	0.067	2.97587e-36
Snrnp48	6.93387e-51	0.0464023	0.387	0.215	1.50846e-46
Ltbp1	0.000643588	0.0463835	0.915	0.817	1
Akt2	1.30847e-54	0.0463786	0.278	0.14	2.84658e-50
Plpp5	9.52249e-44	0.0463719	0.177	0.084	2.07162e-39
Man1a2	3.9717e-42	0.046347	0.493	0.296	8.64043e-38
Esyt1	3.7466e-45	0.046329	0.26	0.138	8.15072e-41
Gar1	1.23069e-49	0.0462883	0.195	0.091	2.67736e-45
Prmt2	4.1847e-41	0.0462438	0.154	0.072	9.10382e-37
Ctps2	8.60772e-38	0.0461863	0.123	0.054	1.87261e-33
Sec13	4.55156e-46	0.0461407	0.477	0.278	9.90192e-42
Arfip2	6.51164e-41	0.0460541	0.132	0.057	1.41661e-36
Phb	9.35389e-57	0.046026	0.329	0.169	2.03494e-52
Chst12	6.40074e-43	0.0459664	0.177	0.085	1.39248e-38
Ttc39b	8.27543e-38	0.0459301	0.226	0.122	1.80032e-33
Ap1s1	2.18088e-49	0.0459064	0.279	0.145	4.74451e-45
Cbx4	1.55501e-36	0.0458883	0.133	0.062	3.38292e-32
Ndufs4	2.30836e-40	0.0458706	0.554	0.333	5.02183e-36
Cdk2ap2	5.18374e-28	0.0458584	0.679	0.456	1.12772e-23
Wdr18	3.2629e-44	0.0458503	0.194	0.095	7.09843e-40
Nudt3	3.3983e-49	0.0458218	0.253	0.128	7.393e-45
Mmp16	1.7288e-33	0.045819	0.102	0.044	3.761e-29
Fdx2	6.27393e-50	0.0457308	0.281	0.145	1.36489e-45
Tomm22	4.78588e-39	0.0457249	0.606	0.367	1.04117e-34
Med13	1.29677e-42	0.0457183	0.369	0.214	2.82111e-38
Zswim8	9.71014e-42	0.0457126	0.176	0.085	2.11244e-37
Rab22a	3.2534e-50	0.0456984	0.322	0.172	7.07777e-46
Hadh	2.96609e-47	0.0456829	0.383	0.215	6.45273e-43
BC029722	1.19486e-43	0.0456596	0.185	0.089	2.59941e-39
Arhgap21	1.10708e-40	0.0456236	0.141	0.064	2.40844e-36
Kcmf1	2.59136e-53	0.0456112	0.389	0.211	5.63751e-49
Sipa1l1	4.80161e-43	0.0455885	0.18	0.087	1.04459e-38
Prpf38a	1.13986e-51	0.045573	0.219	0.104	2.47977e-47
Srsf11	1.43246e-28	0.0455547	0.642	0.424	3.11632e-24
Gpn1	2.79888e-40	0.0455483	0.133	0.059	6.08897e-36
Ncoa6	2.28715e-43	0.0455472	0.148	0.066	4.9757e-39
Mta1	7.14287e-46	0.0454217	0.212	0.105	1.55393e-41
Oxct1	3.64423e-11	0.0453938	0.886	0.736	7.92803e-07
Gpaa1	8.37844e-37	0.0453411	0.113	0.049	1.82273e-32
Pfn2	7.30118e-45	0.0453396	0.157	0.071	1.58837e-40
Snrpn	4.00842e-44	0.0453368	0.186	0.09	8.72031e-40
Mtg2	6.58282e-43	0.0453319	0.125	0.052	1.43209e-38
Yrdc	5.35077e-46	0.0452856	0.175	0.081	1.16406e-41
Uba3	5.11217e-46	0.0452431	0.186	0.089	1.11215e-41
Crebzf	5.47704e-33	0.0452327	0.12	0.056	1.19153e-28
Kank2	2.51997e-44	0.0451963	0.474	0.28	5.48219e-40
Evi5	1.20556e-42	0.0451926	0.405	0.235	2.6227e-38
Hnrnpul2	2.4299e-45	0.0451536	0.413	0.237	5.28625e-41
Sema3b	1.1199e-32	0.045139	0.133	0.065	2.43634e-28
Irf1	1.64794e-32	0.0451389	0.192	0.107	3.5851e-28
Pld3	3.53603e-47	0.0451375	0.176	0.081	7.69264e-43
Yif1a	1.39441e-50	0.0450552	0.333	0.178	3.03354e-46
Fgfrl1	1.852e-35	0.0450276	0.318	0.19	4.02903e-31
Tmem203	3.18431e-37	0.0450061	0.136	0.063	6.92747e-33
Adgra3	1.38369e-40	0.0449803	0.208	0.108	3.01021e-36
March5	3.25793e-50	0.0449218	0.337	0.181	7.08762e-46
Ifi30	3.03267e-42	0.0448984	0.219	0.113	6.59757e-38
Tbc1d12	3.48381e-43	0.044873	0.209	0.106	7.57903e-39
Herpud2	4.30625e-46	0.0448156	0.263	0.138	9.36825e-42
Rnf215	2.80432e-36	0.0447931	0.124	0.056	6.1008e-32
Ccdc71l	3.05e-42	0.0447927	0.169	0.08	6.63529e-38
Spen	2.57489e-34	0.0447725	0.193	0.104	5.60167e-30
Nsd3	6.80195e-51	0.0447692	0.338	0.182	1.47976e-46
Fam219b	5.9711e-40	0.0447331	0.11	0.045	1.29901e-35
Terf2ip	4.72483e-46	0.0447036	0.159	0.071	1.02789e-41
Mfap2	2.50475e-32	0.0446911	0.121	0.057	5.44908e-28
Fibin	1.86468e-27	0.0446275	0.383	0.251	4.05661e-23
Rrm2b	2.16592e-47	0.0446212	0.306	0.165	4.71196e-43
4833420G17Rik	1.13144e-38	0.0446208	0.179	0.09	2.46146e-34
Zfp707	5.96263e-39	0.0446101	0.138	0.063	1.29717e-34
Slc25a38	1.70267e-37	0.0445834	0.117	0.05	3.70417e-33
Rassf1	6.2981e-42	0.0445434	0.252	0.137	1.37015e-37
Zpr1	1.0208e-45	0.0445107	0.145	0.062	2.22075e-41
Degs1	3.04902e-29	0.0444578	0.612	0.396	6.63314e-25
Nagk	2.14954e-46	0.0444423	0.275	0.146	4.67633e-42
Traf5	1.70284e-41	0.0444292	0.164	0.078	3.70452e-37
Pcm1	3.14924e-34	0.0443825	0.522	0.33	6.85116e-30
Nectin3	3.52262e-35	0.0443012	0.145	0.071	7.66345e-31
Ankrd11	7.01621e-29	0.0442921	0.601	0.401	1.52638e-24
Zfp637	2.84276e-53	0.0442701	0.268	0.134	6.18441e-49
Med7	2.05481e-42	0.0442541	0.178	0.086	4.47024e-38
Ptgr2	1.7983e-42	0.0442292	0.138	0.06	3.9122e-38
Fam118a	8.90613e-42	0.0442058	0.195	0.098	1.93753e-37
Spsb3	6.81947e-42	0.0441841	0.129	0.055	1.48357e-37
Endod1	1.02821e-19	0.0441523	0.642	0.452	2.23688e-15
Thbd	8.6053e-30	0.0441497	0.165	0.09	1.87208e-25
Stx16	3.74011e-36	0.0441105	0.138	0.065	8.13662e-32
Plaat1	1.22105e-40	0.0441053	0.142	0.064	2.6564e-36
Tpm3	9.61961e-35	0.044091	0.529	0.334	2.09275e-30
Taf1a	1.21758e-39	0.0440706	0.144	0.067	2.64885e-35
Zfp367	4.17332e-50	0.0440367	0.274	0.141	9.07906e-46
Cul4b	1.10125e-40	0.0439622	0.121	0.051	2.39578e-36
Plxna4	1.36286e-37	0.0438769	0.148	0.071	2.9649e-33
Ran	3.96297e-22	0.043869	0.71	0.489	8.62144e-18
Ascc1	8.35331e-46	0.043799	0.155	0.069	1.81726e-41
Ubtf	5.88071e-41	0.0437912	0.355	0.206	1.27935e-36
B3gnt2	4.27041e-46	0.0437172	0.245	0.127	9.29029e-42
Kat8	3.88274e-42	0.0436725	0.116	0.046	8.44689e-38
Mettl16	9.04066e-44	0.0436439	0.199	0.099	1.9668e-39
Erc1	1.13289e-41	0.0436283	0.259	0.14	2.46461e-37
Ubr3	1.24221e-38	0.0436199	0.251	0.138	2.70243e-34
Dmxl1	7.98681e-47	0.0436133	0.338	0.189	1.73753e-42
Rhou	1.32655e-34	0.0436093	0.103	0.044	2.8859e-30
St6galnac6	1.18951e-46	0.0435938	0.188	0.089	2.58777e-42
Dpp3	4.18111e-34	0.0435277	0.116	0.053	9.09599e-30
Fkbp2	1.35969e-26	0.0434506	0.663	0.448	2.95801e-22
Dpm2	3.17566e-47	0.0434404	0.374	0.208	6.90866e-43
Fars2	4.95247e-36	0.0434352	0.104	0.043	1.07741e-31
Mrps23	2.49441e-45	0.0433906	0.2	0.098	5.42659e-41
Poldip2	5.72479e-46	0.0432825	0.169	0.077	1.24543e-41
Hspg2	5.33056e-15	0.0432634	0.69	0.493	1.15966e-10
Hsf1	5.208e-42	0.0432185	0.143	0.064	1.133e-37
Slc12a4	4.75485e-45	0.0432175	0.195	0.095	1.03442e-40
Mef2a	6.79431e-13	0.0432137	0.794	0.599	1.4781e-08
Vps41	6.74885e-43	0.0431935	0.193	0.095	1.46821e-38
Eif2ak2	2.82723e-34	0.0431844	0.103	0.044	6.15063e-30
Mcam	2.15553e-16	0.0431433	0.698	0.511	4.68936e-12
Cables1	7.45365e-35	0.0431263	0.105	0.045	1.62154e-30
Srrt	2.96877e-44	0.0431229	0.194	0.095	6.45856e-40
Ripk1	8.84398e-33	0.0431084	0.198	0.109	1.92401e-28
Me1	7.57585e-50	0.0430659	0.363	0.2	1.64813e-45
Dnajc30	6.50006e-49	0.0430397	0.216	0.105	1.41409e-44
Slc25a51	1.09559e-40	0.0429743	0.151	0.07	2.38346e-36
1700123O20Rik	5.80444e-50	0.042948	0.204	0.096	1.26276e-45
Atp2c1	5.76488e-47	0.0429211	0.216	0.107	1.25415e-42
Fmo5	7.20753e-34	0.0428972	0.12	0.055	1.568e-29
Kctd2	3.41988e-44	0.042879	0.159	0.072	7.43995e-40
Clpb	6.5096e-32	0.0428748	0.108	0.049	1.41616e-27
Gfm1	6.97144e-35	0.0428539	0.171	0.089	1.51664e-30
Nek9	1.93713e-49	0.042847	0.315	0.169	4.21423e-45
Sulf1	3.08149e-15	0.0428438	0.612	0.438	6.70379e-11
Rbck1	1.4722e-43	0.0428416	0.207	0.104	3.20277e-39
Pex2	6.00526e-38	0.0428324	0.126	0.056	1.30644e-33
Rpl21	7.8585e-14	0.0428276	0.991	0.995	1.70962e-09
Slc25a36	5.17778e-44	0.0428228	0.244	0.128	1.12643e-39
Ulk2	1.57789e-41	0.0428219	0.286	0.158	3.4327e-37
Gabarapl2	1.12337e-23	0.0428131	0.722	0.494	2.44389e-19
Eif3k	7.05083e-16	0.0428111	0.845	0.651	1.53391e-11
Rnf121	1.95703e-40	0.0427901	0.125	0.053	4.25752e-36
Gde1	2.70609e-51	0.04276	0.451	0.253	5.88709e-47
Ehmt2	9.08389e-36	0.0427253	0.122	0.055	1.9762e-31
Tst	5.03657e-35	0.0427075	0.123	0.056	1.09571e-30
Mxra7	1.27194e-37	0.0426908	0.486	0.299	2.7671e-33
Dtd1	1.94289e-43	0.0426602	0.226	0.116	4.22675e-39
Ube2v2	1.56838e-45	0.0426438	0.487	0.282	3.41202e-41
Ubxn2b	1.28372e-40	0.0426358	0.119	0.05	2.79274e-36
Swt1	2.86074e-45	0.0426135	0.333	0.186	6.22354e-41
Rhbdf1	3.04332e-37	0.0426116	0.124	0.055	6.62075e-33
Mgst3	6.46745e-52	0.042581	0.403	0.222	1.40699e-47
Cacnb2	4.10839e-38	0.0425356	0.214	0.114	8.9378e-34
Sqstm1	5.65285e-27	0.0425148	0.676	0.46	1.22978e-22
Ap2a1	1.52573e-42	0.042472	0.219	0.113	3.31922e-38
Gpr108	6.89402e-44	0.0424326	0.194	0.095	1.49979e-39
Trappc6b	8.4035e-41	0.0424326	0.519	0.312	1.82818e-36
Rnf8	1.30751e-42	0.0423971	0.139	0.061	2.8445e-38
Scrn1	2.59204e-37	0.0423721	0.124	0.055	5.63898e-33
Arhgap10	4.0748e-40	0.0423709	0.353	0.205	8.86473e-36
Etf1	4.26582e-53	0.0423266	0.326	0.172	9.2803e-49
Ehbp1l1	9.58397e-53	0.0423038	0.4	0.22	2.08499e-48
Kif5b	8.81453e-12	0.0422926	0.874	0.699	1.9176e-07
Foxp4	2.92625e-40	0.0422731	0.141	0.064	6.36606e-36
Tmem80	1.89605e-45	0.0422503	0.212	0.106	4.12485e-41
Ppp1r7	8.18389e-52	0.0422418	0.283	0.145	1.78041e-47
Thap3	2.42631e-39	0.0421824	0.22	0.116	5.27843e-35
Fbxl3	2.83294e-47	0.0421627	0.296	0.159	6.16306e-43
Adprhl2	2.08671e-38	0.0421576	0.101	0.04	4.53963e-34
Pfdn6	1.91384e-44	0.0421562	0.526	0.31	4.16355e-40
Top3b	5.75957e-36	0.0421423	0.111	0.048	1.25299e-31
Lrrc75a	7.67054e-37	0.042075	0.113	0.049	1.66873e-32
Bclaf3	3.87757e-37	0.0420551	0.165	0.082	8.43565e-33
Atf6b	5.41842e-42	0.0420148	0.155	0.072	1.17878e-37
Ing1	7.03991e-42	0.042007	0.357	0.206	1.53153e-37
Npc1	2.65878e-37	0.0420016	0.171	0.086	5.78418e-33
Sdhaf1	1.25201e-42	0.0419272	0.184	0.089	2.72374e-38
Pepd	4.60688e-34	0.0419097	0.118	0.053	1.00223e-29
Elovl1	5.06512e-41	0.0418261	0.277	0.152	1.10192e-36
Ppp1cc	1.61376e-47	0.041789	0.312	0.169	3.51074e-43
Sil1	1.29237e-38	0.0417282	0.183	0.093	2.81155e-34
Pi4k2a	2.96169e-40	0.041686	0.156	0.073	6.44315e-36
Urm1	2.23673e-42	0.0416242	0.157	0.072	4.86601e-38
Cdr2	1.3337e-38	0.0415966	0.323	0.186	2.90146e-34
Chmp1a	1.26993e-49	0.0415911	0.255	0.129	2.76272e-45
Tpgs1	1.83291e-51	0.0414592	0.265	0.134	3.9875e-47
Notch3	4.70867e-31	0.0414253	0.132	0.066	1.02437e-26
Impact	2.35964e-42	0.04141	0.32	0.181	5.13341e-38
Hspbp1	9.63075e-40	0.0413916	0.151	0.07	2.09517e-35
Nt5c3b	3.74903e-44	0.0413796	0.267	0.142	8.15602e-40
Ngdn	1.95459e-50	0.0413106	0.236	0.116	4.2522e-46
Scoc	1.64024e-27	0.0412329	0.604	0.394	3.56835e-23
Gpx7	2.46061e-45	0.0412025	0.237	0.121	5.35306e-41
Ube2f	9.81175e-51	0.0411863	0.262	0.132	2.13455e-46
Topors	2.35223e-39	0.0411785	0.243	0.132	5.11728e-35
Insr	4.3591e-43	0.041102	0.273	0.148	9.48322e-39
Boc	1.58419e-34	0.0410566	0.112	0.05	3.44641e-30
Tbce	7.35877e-38	0.0410506	0.129	0.058	1.6009e-33
Nptn	1.30595e-10	0.0410272	0.877	0.698	2.8411e-06
Isoc1	9.51902e-35	0.0410257	0.114	0.05	2.07086e-30
Gnl2	1.06888e-40	0.0409899	0.185	0.092	2.32535e-36
Znhit6	7.5542e-40	0.0409876	0.15	0.07	1.64342e-35
Slc41a1	1.16747e-32	0.0409589	0.122	0.058	2.53983e-28
G6pc3	8.3447e-41	0.0409511	0.163	0.077	1.81539e-36
Ddx56	7.1832e-31	0.0408779	0.106	0.048	1.56271e-26
Cdc42ep5	1.09083e-50	0.0408267	0.274	0.141	2.37311e-46
Eif2s3y	2.59075e-54	0.040745	0.122	0.043	5.63617e-50
Keap1	1.30313e-43	0.0406558	0.229	0.118	2.83495e-39
Snap47	1.39702e-40	0.040631	0.143	0.065	3.03921e-36
Ttc33	9.40723e-44	0.0406162	0.216	0.11	2.04654e-39
Rexo1	1.69415e-33	0.0406074	0.148	0.074	3.68562e-29
Med4	7.01881e-48	0.0406006	0.182	0.084	1.52694e-43
Gtf2b	5.40695e-48	0.0405818	0.274	0.143	1.17628e-43
Yif1b	3.50496e-53	0.0405183	0.393	0.214	7.62503e-49
Pigp	2.07428e-30	0.0404959	0.608	0.397	4.5126e-26
Snrnp40	4.32251e-41	0.040487	0.147	0.067	9.40361e-37
Hnrnpa2b1	7.86237e-10	0.0404492	0.892	0.734	1.71046e-05
Wdr33	5.50779e-52	0.0404465	0.342	0.183	1.19822e-47
Mpp1	5.37979e-39	0.0403966	0.166	0.081	1.17037e-34
Gatd1	7.77844e-48	0.0403644	0.153	0.066	1.6922e-43
Rab3a	1.02662e-41	0.0403316	0.239	0.126	2.23341e-37
Gabra3	2.27899e-44	0.040326	0.318	0.179	4.95794e-40
Znrf1	7.25218e-41	0.0403023	0.187	0.093	1.57771e-36
Uqcc3	2.53953e-50	0.0402984	0.317	0.168	5.52476e-46
Jtb	2.80731e-46	0.0402948	0.323	0.177	6.1073e-42
Ube2e2	2.60948e-45	0.0402908	0.174	0.081	5.67693e-41
Ncaph2	9.93321e-42	0.0402726	0.169	0.081	2.16097e-37
Habp4	4.38452e-45	0.0402598	0.181	0.085	9.53853e-41
Dzip1l	4.63391e-38	0.0402075	0.152	0.073	1.00811e-33
2410004B18Rik	4.66622e-36	0.0402038	0.163	0.082	1.01514e-31
Abt1	1.10211e-37	0.0401588	0.141	0.065	2.39764e-33
Zfand6	4.4042e-33	0.0401113	0.58	0.364	9.58135e-29
Mlx	3.00891e-49	0.0401111	0.241	0.12	6.54588e-45
Selenon	8.22237e-37	0.0401092	0.127	0.057	1.78878e-32
2310022B05Rik	9.48587e-31	0.0401067	0.574	0.371	2.06365e-26
Gabarap	1.05158e-10	0.040103	0.932	0.845	2.2877e-06
Apbb1	1.43998e-39	0.0400836	0.173	0.086	3.13268e-35
Maip1	1.58121e-43	0.0400274	0.192	0.094	3.43993e-39
Sacm1l	1.7964e-46	0.0399567	0.282	0.149	3.90807e-42
Sirt3	1.56635e-38	0.0399062	0.144	0.067	3.40759e-34
Pef1	1.33481e-37	0.0398215	0.16	0.078	2.90387e-33
Slc35a1	7.93461e-40	0.0397738	0.177	0.087	1.72617e-35
Peg3	4.94201e-31	0.0397506	0.352	0.219	1.07513e-26
2310011J03Rik	1.63964e-45	0.0397178	0.208	0.102	3.56704e-41
Man2c1	2.31059e-34	0.0397078	0.111	0.049	5.02668e-30
Cd248	7.16312e-31	0.0396983	0.103	0.046	1.55834e-26
Sac3d1	2.82477e-38	0.0396319	0.11	0.046	6.14529e-34
Wbp1l	8.33397e-35	0.0396013	0.132	0.062	1.81305e-30
Angpt2	3.23518e-30	0.0395643	0.181	0.1	7.03812e-26
Surf2	4.07464e-46	0.0395621	0.186	0.087	8.86438e-42
Sod2	1.82346e-32	0.0395468	0.574	0.362	3.96694e-28
AI837181	5.58672e-46	0.0395237	0.201	0.098	1.21539e-41
Abhd11	2.38331e-33	0.0395166	0.109	0.048	5.1849e-29
Specc1	4.3903e-31	0.0395128	0.382	0.241	9.5511e-27
P2rx4	3.56075e-29	0.0395078	0.1	0.046	7.74642e-25
Plec	1.74334e-34	0.039506	0.36	0.218	3.79264e-30
Pomgnt1	7.30951e-43	0.0395046	0.173	0.082	1.59018e-38
Gnl1	5.08001e-48	0.0395039	0.178	0.081	1.10516e-43
Igsf8	5.00774e-42	0.0394939	0.241	0.128	1.08943e-37
Jpt1	4.60655e-38	0.0394863	0.215	0.115	1.00216e-33
Fam110b	1.71322e-37	0.0394665	0.145	0.068	3.72711e-33
Fbxl15	7.56513e-37	0.0394086	0.108	0.045	1.64579e-32
4930402H24Rik	9.49685e-32	0.0394075	0.124	0.06	2.06604e-27
Tgfbr2	1.40159e-43	0.0393617	0.343	0.193	3.04915e-39
Galnt2	1.37176e-32	0.0393575	0.485	0.304	2.98426e-28
Furin	1.24474e-42	0.0393451	0.217	0.111	2.70793e-38
Polr1c	9.15012e-48	0.0393048	0.194	0.092	1.99061e-43
Gusb	5.29483e-39	0.039304	0.184	0.093	1.15189e-34
Syncrip	1.60517e-36	0.0392961	0.448	0.273	3.49204e-32
Yaf2	7.73521e-48	0.0392575	0.438	0.249	1.6828e-43
Gpn3	1.65147e-44	0.0392314	0.171	0.08	3.59278e-40
Sdhb	2.88423e-37	0.0391793	0.614	0.379	6.27464e-33
Vps35	1.97025e-39	0.039165	0.474	0.285	4.28627e-35
Kcnq1ot1	1.93758e-25	0.0390913	0.185	0.111	4.2152e-21
Slc31a2	1.27606e-43	0.039015	0.131	0.055	2.77606e-39
Enah	5.67838e-06	0.0389381	0.87	0.741	0.123533
Vps26c	8.80955e-43	0.0389228	0.164	0.076	1.91652e-38
Chuk	2.96077e-34	0.0388747	0.122	0.056	6.44116e-30
Kat5	8.14156e-36	0.0388594	0.111	0.048	1.7712e-31
Vps26a	8.40309e-49	0.0388435	0.228	0.112	1.82809e-44
Cttnbp2nl	3.72547e-37	0.0387951	0.269	0.153	8.10477e-33
Sptlc2	4.90612e-35	0.0387804	0.101	0.042	1.06733e-30
Ctdsp1	1.29887e-50	0.038727	0.334	0.179	2.82569e-46
Fam114a2	1.57089e-41	0.0387134	0.261	0.141	3.41748e-37
Actr3	4.28139e-19	0.0386883	0.719	0.508	9.31417e-15
Brwd1	5.96782e-40	0.0386561	0.258	0.142	1.2983e-35
Stom	8.82675e-43	0.0385683	0.297	0.165	1.92026e-38
Map3k3	8.40036e-35	0.0385595	0.102	0.043	1.8275e-30
Resf1	3.22185e-30	0.0384873	0.453	0.296	7.00914e-26
Rnf114	2.34047e-45	0.0384847	0.169	0.078	5.0917e-41
Cops7a	1.16671e-51	0.0384561	0.267	0.135	2.53817e-47
Castor1	4.47808e-32	0.038449	0.102	0.045	9.74206e-28
Nr2c2ap	2.00256e-38	0.0384443	0.159	0.077	4.35658e-34
Asf1a	2.63206e-48	0.038424	0.202	0.096	5.72604e-44
Cpt1a	4.09134e-40	0.0384148	0.191	0.097	8.90071e-36
Minpp1	2.42263e-32	0.0383852	0.103	0.045	5.27043e-28
Copz1	6.22251e-51	0.0383619	0.278	0.142	1.35371e-46
Slc35f5	3.03655e-37	0.038356	0.145	0.069	6.60601e-33
Stim2	1.69185e-36	0.0383512	0.131	0.06	3.68062e-32
Nucb1	1.16795e-21	0.0383092	0.643	0.438	2.54087e-17
Mapkapk2	4.44487e-44	0.0382839	0.274	0.147	9.66982e-40
Nedd9	1.34058e-37	0.0382746	0.402	0.242	2.91642e-33
Smim5	8.05558e-36	0.0382461	0.246	0.139	1.75249e-31
Emc4	5.06043e-50	0.0382459	0.414	0.23	1.1009e-45
Trappc4	3.16772e-48	0.0382325	0.406	0.227	6.89136e-44
Btbd6	7.21592e-32	0.0382001	0.101	0.044	1.56982e-27
Entr1	1.60285e-33	0.0381897	0.119	0.055	3.48701e-29
Rad23a	6.6416e-42	0.0381463	0.355	0.202	1.44488e-37
Cry2	3.82889e-35	0.0381257	0.131	0.061	8.32974e-31
Farsa	1.13053e-35	0.0380837	0.124	0.056	2.45947e-31
Cab39	5.38061e-40	0.0380741	0.504	0.305	1.17055e-35
Mpg	5.97082e-37	0.0380559	0.126	0.056	1.29895e-32
Pex11b	8.23642e-43	0.0380177	0.164	0.076	1.79183e-38
Sav1	6.78324e-45	0.0380053	0.189	0.091	1.47569e-40
Spag7	5.80612e-45	0.0380013	0.454	0.261	1.26312e-40
Kdelr3	5.76672e-43	0.0379875	0.264	0.142	1.25455e-38
Ssh2	6.91169e-33	0.0379619	0.14	0.069	1.50364e-28
Inpp5k	2.37543e-30	0.0379408	0.103	0.046	5.16774e-26
Atxn7	1.37564e-35	0.0378767	0.172	0.088	2.99271e-31
Uchl5	5.2333e-44	0.0378607	0.157	0.071	1.13851e-39
Ddx6	9.68035e-30	0.037853	0.579	0.377	2.10596e-25
Bst2	1.67036e-39	0.0377122	0.352	0.204	3.63387e-35
Fech	4.27734e-40	0.0377035	0.185	0.093	9.30535e-36
Acta2	0.000718701	0.0376983	1	0.998	1
0610012G03Rik	3.75124e-53	0.037691	0.407	0.223	8.16082e-49
Crbn	1.63351e-43	0.0376857	0.182	0.087	3.55371e-39
Idh3b	3.55816e-51	0.0375706	0.438	0.243	7.74077e-47
Lmna	5.04877e-10	0.0375287	0.912	0.767	1.09836e-05
Fuom	4.70033e-47	0.0375197	0.227	0.113	1.02256e-42
Rab8a	4.69803e-48	0.0375169	0.286	0.15	1.02206e-43
Psmd14	3.88396e-44	0.037491	0.374	0.211	8.44956e-40
Hdgfl2	5.48135e-39	0.037413	0.165	0.08	1.19247e-34
Nudt13	3.34644e-37	0.0374002	0.151	0.073	7.28018e-33
Cdc37	1.45322e-20	0.0373712	0.719	0.493	3.16149e-16
Kmt2a	2.05908e-24	0.0373562	0.535	0.36	4.47953e-20
Pdcd7	2.56629e-35	0.0373473	0.194	0.103	5.58296e-31
Ext2	7.40078e-44	0.0373442	0.312	0.172	1.61004e-39
Ube2j2	1.35112e-44	0.0372949	0.215	0.107	2.93936e-40
Gpr107	2.50576e-36	0.0372719	0.17	0.086	5.45128e-32
Srprb	5.21351e-46	0.0372566	0.217	0.108	1.1342e-41
Prxl2b	1.17041e-37	0.0372509	0.125	0.055	2.54623e-33
Tmem150a	1.59983e-37	0.037245	0.13	0.059	3.48044e-33
Ranbp3	4.51226e-38	0.0372155	0.126	0.056	9.81642e-34
Ahctf1	1.05016e-39	0.0372025	0.213	0.112	2.28463e-35
Hist3h2a	3.42048e-35	0.0371895	0.143	0.07	7.44126e-31
Rnft1	1.87541e-44	0.0371604	0.304	0.166	4.07996e-40
Ip6k1	3.11176e-37	0.0371508	0.18	0.092	6.76964e-33
Ncln	6.15656e-39	0.0371449	0.131	0.058	1.33936e-34
Plgrkt	7.23578e-46	0.0371437	0.366	0.204	1.57414e-41
Pacsin3	1.04056e-41	0.0370972	0.151	0.069	2.26373e-37
Cdk5rap3	1.1411e-41	0.0370816	0.192	0.096	2.48246e-37
A4galt	3.76385e-39	0.0370115	0.121	0.052	8.18826e-35
Cmtm6	5.59664e-37	0.0369721	0.167	0.083	1.21755e-32
Rala	4.58605e-48	0.0368883	0.366	0.202	9.97695e-44
Arid4a	1.58631e-41	0.0368727	0.357	0.207	3.45103e-37
Alkbh3	6.7153e-36	0.0368669	0.132	0.061	1.46091e-31
Tarbp2	7.49565e-31	0.036838	0.107	0.049	1.63068e-26
Dmwd	4.0398e-40	0.0368351	0.229	0.122	8.78859e-36
Tsg101	1.20575e-49	0.0368315	0.272	0.14	2.6231e-45
Cyb5a	1.18593e-14	0.036821	0.839	0.637	2.58e-10
Dhrs1	8.62149e-51	0.0368206	0.263	0.133	1.87561e-46
Xpo6	7.47127e-33	0.0368041	0.113	0.052	1.62537e-28
Vta1	3.76366e-47	0.0367774	0.219	0.108	8.18784e-43
Nrd1	9.16064e-44	0.0367571	0.366	0.21	1.9929e-39
Phkb	5.72768e-38	0.0367273	0.186	0.095	1.24606e-33
Mrps34	5.21346e-46	0.0367269	0.34	0.188	1.13419e-41
Syt11	1.59526e-39	0.0367026	0.374	0.22	3.47048e-35
Comtd1	2.27933e-32	0.0367011	0.11	0.05	4.95868e-28
Naxd	2.13744e-46	0.0366905	0.363	0.203	4.64999e-42
Ppil4	5.78102e-43	0.0366827	0.311	0.173	1.25766e-38
Synj2bp	5.60878e-44	0.036662	0.469	0.276	1.22019e-39
Atg10	1.27914e-41	0.0365926	0.152	0.07	2.78276e-37
Zfp445	7.05201e-41	0.0365863	0.198	0.101	1.53416e-36
Ddi2	4.52062e-43	0.0365669	0.275	0.15	9.83461e-39
Ppp1r15b	3.90469e-33	0.0365538	0.111	0.05	8.49465e-29
Wrnip1	1.4184e-31	0.0365383	0.133	0.065	3.08573e-27
9130401M01Rik	1.41235e-40	0.0365213	0.189	0.094	3.07257e-36
Wsb2	1.92021e-45	0.0364811	0.282	0.151	4.17742e-41
Bphl	6.64086e-39	0.0364743	0.193	0.099	1.44472e-34
3830406C13Rik	9.98895e-46	0.0364215	0.328	0.181	2.1731e-41
Ercc1	1.55627e-48	0.0364138	0.264	0.136	3.38566e-44
Prelid1	2.64772e-39	0.0363724	0.55	0.334	5.76012e-35
Rps23	1.70268e-12	0.0363698	0.984	0.989	3.70418e-08
Cdk16	1.39788e-31	0.0363679	0.119	0.057	3.0411e-27
Tmem237	6.96297e-37	0.036359	0.155	0.076	1.51479e-32
Letm2	7.77412e-30	0.0363558	0.103	0.047	1.69126e-25
Hjurp	1.14633e-33	0.0363368	0.157	0.08	2.49384e-29
Poglut2	8.25569e-33	0.0363346	0.114	0.052	1.79602e-28
Amn1	2.58011e-29	0.0363303	0.112	0.053	5.61304e-25
Ap3s2	7.46182e-32	0.0363219	0.106	0.048	1.62332e-27
Ppa2	1.55031e-42	0.0363144	0.244	0.129	3.3727e-38
Plekhm2	2.13208e-34	0.0363113	0.16	0.081	4.63833e-30
Zfpm2	2.74822e-29	0.036234	0.13	0.066	5.97876e-25
Twsg1	4.96736e-18	0.0362048	0.714	0.506	1.08065e-13
Atic	7.68813e-39	0.0361957	0.195	0.1	1.67255e-34
Flot2	6.65254e-46	0.0361533	0.378	0.213	1.44726e-41
Golga7	4.60247e-44	0.0361484	0.283	0.153	1.00127e-39
Mid1ip1	1.55569e-42	0.0361474	0.264	0.143	3.3844e-38
Mpc1	8.8298e-16	0.0361045	0.787	0.574	1.92092e-11
Ctnna3	5.05017e-29	0.0360858	0.117	0.057	1.09866e-24
Vapb	1.23851e-40	0.0360418	0.512	0.306	2.69438e-36
Timm17b	5.44079e-48	0.0360226	0.375	0.208	1.18364e-43
Pttg1ip	2.97618e-30	0.0360224	0.624	0.402	6.47469e-26
Rab24	3.73197e-47	0.0360051	0.3	0.16	8.11891e-43
Gnb4	2.31951e-24	0.0359992	0.627	0.425	5.0461e-20
Rnf5	1.398e-41	0.035991	0.208	0.105	3.04135e-37
Castor2	1.31606e-30	0.0359856	0.112	0.052	2.86309e-26
Prelp	6.60755e-06	0.0359796	0.843	0.702	0.143747
Hdac11	2.08636e-40	0.0359788	0.137	0.061	4.53888e-36
Cnksr3	9.59651e-39	0.0359756	0.15	0.071	2.08772e-34
Sypl	9.17062e-23	0.0359574	0.658	0.438	1.99507e-18
Kmt5b	2.05838e-40	0.0359315	0.307	0.173	4.47801e-36
Thap11	3.89768e-38	0.0359139	0.129	0.058	8.4794e-34
Clpp	1.4614e-43	0.0359107	0.368	0.209	3.17927e-39
Acbd6	3.48773e-47	0.0358792	0.359	0.198	7.58756e-43
Adpgk	1.71118e-33	0.0358216	0.133	0.064	3.72268e-29
Zfp292	4.39517e-41	0.0358178	0.345	0.198	9.56169e-37
Col4a1	0.0127587	0.0356742	0.923	0.823	1
Trim3	3.26729e-35	0.0356453	0.11	0.048	7.108e-31
Rraga	7.27888e-48	0.0356309	0.41	0.231	1.58352e-43
Rab11b	3.42482e-29	0.0355909	0.628	0.408	7.45069e-25
Dvl1	9.33359e-37	0.0355745	0.132	0.061	2.03052e-32
Taf10	3.50474e-43	0.0355663	0.433	0.252	7.62457e-39
Rab18	2.49416e-22	0.0355561	0.699	0.473	5.42605e-18
Gtpbp4	3.99611e-41	0.0354896	0.411	0.241	8.69354e-37
Nudt19	3.09317e-42	0.0354542	0.159	0.074	6.7292e-38
Hspb8	2.27254e-42	0.0354095	0.411	0.24	4.94392e-38
Txnrd1	1.20866e-39	0.0354056	0.298	0.168	2.62945e-35
2510039O18Rik	1.21056e-32	0.0353678	0.139	0.069	2.63358e-28
Maz	1.5279e-42	0.035353	0.181	0.087	3.32394e-38
Flnc	7.36297e-32	0.0353493	0.242	0.141	1.60182e-27
Scamp3	5.66248e-43	0.0353444	0.243	0.127	1.23187e-38
Zfp524	3.00373e-30	0.0353058	0.101	0.045	6.53462e-26
Arih1	2.34389e-38	0.0353029	0.4	0.237	5.09913e-34
Rb1cc1	1.75581e-42	0.0352995	0.405	0.237	3.81977e-38
Polr2h	9.21093e-44	0.0352816	0.221	0.112	2.00384e-39
Mrpl4	2.73758e-45	0.0352768	0.398	0.224	5.95561e-41
Mgat2	5.95328e-44	0.0352634	0.306	0.168	1.29514e-39
Mcrip2	4.30143e-32	0.0352379	0.103	0.045	9.35776e-28
Trap1	9.67923e-36	0.0352172	0.161	0.08	2.10572e-31
Srpk1	8.27608e-44	0.0351428	0.243	0.127	1.80046e-39
Adamts10	8.68487e-33	0.0350288	0.174	0.092	1.88939e-28
Parm1	4.89778e-34	0.0350215	0.11	0.049	1.06551e-29
Ncald	1.24245e-37	0.0350097	0.187	0.096	2.70295e-33
Slc25a19	7.33298e-29	0.0349513	0.102	0.047	1.59529e-24
Klhl13	6.594e-40	0.0349266	0.158	0.075	1.43453e-35
B9d2	4.49897e-34	0.0348775	0.132	0.063	9.7875e-30
Cobl	1.011e-26	0.0348442	0.106	0.051	2.19944e-22
Tmub2	1.27206e-33	0.0348255	0.108	0.047	2.76737e-29
Fmnl3	2.37006e-35	0.0348069	0.156	0.077	5.15608e-31
Tpd52l2	2.42441e-30	0.0347607	0.613	0.392	5.2743e-26
[truncated: 4,746 more rows]
