# Supplementary material for: Intrinsic Gata4 expression sensitizes the aortic root to dilation in a Loeys-Dietz syndrome mouse model
Source: Research Square preprint supplement (doi:10.21203/rs.3.rs-4420617/v1), 2024-06-05
Supplement: Supplementary file 25 [file Supplemental_Table 7.xlsx]

## Sheet: VSMC1.MRvsVSMC2.MR.VSMCsOnly.di
Supplemental Table 7.
List of transcripts detected in mouse Tgfbr1M318R/+ VSMC1 relative to Tgfbr1M318R/+ VSMC2. Although all detected transcripts are shown, the following filtering criteria were used to select transcripts for enrichment analysis: Pct >0.2 in higher expressing sample, Adj P<0.05, Abs FC >1. Gene enrichment analyses using ClueGo and EnrichR are shown in subsequent tabs.
	p_val	avg_log2FC	pct.1	pct.2	p_val_adj
Zfp385b	3.98041e-06	4.92479	0.026	0	0.0795485
Fam19a1	1.64327e-23	4.7699	0.129	0.008	3.28408e-19
Klhl41	8.42457e-06	4.53725	0.027	0.001	0.168365
Kcnc4	2.46403e-10	4.37481	0.056	0.004	4.92437e-06
Mia	6.21938e-06	4.27507	0.031	0.003	0.124294
Myh7	2.99017e-05	4.05995	0.024	0.001	0.597586
Gm14285	0.00161881	3.91102	0.013	0	1
B430010I23Rik	0.000977098	3.83351	0.016	0.001	1
Npr1	5.83952e-70	3.75605	0.369	0.046	1.16703e-65
AC154509.1	2.507e-12	3.75117	0.069	0.005	5.01023e-08
Gpr4	0.00510674	3.7105	0.01	0	1
Mgat5b	7.19829e-09	3.67791	0.049	0.004	0.000143858
Galnt6	1.4789e-08	3.56384	0.052	0.006	0.000295558
Nxph3	0.00580842	3.50709	0.01	0	1
Krt18	3.70639e-20	3.45897	0.135	0.02	7.40722e-16
Flrt3	0.000109666	3.37025	0.026	0.004	1
Pde1c	6.20644e-08	3.31502	0.046	0.005	0.00124036
Tceal6	0.000796901	3.29939	0.019	0.003	1
Unc45b	4.90673e-07	3.28433	0.037	0.003	0.0098061
Olfr329-ps	7.69115e-06	3.1911	0.033	0.004	0.153708
5730596B20Rik	0.000771114	3.14551	0.022	0.004	1
Elovl7	6.9148e-06	3.12425	0.037	0.006	0.138192
Grid2	8.0701e-06	3.08707	0.037	0.006	0.161281
Hoxa5	3.26221e-05	3.06388	0.027	0.003	0.651954
Olfr224	9.9355e-13	3.03896	0.089	0.015	1.98561e-08
Ndnf	2.21564e-17	3.00368	0.133	0.028	4.42797e-13
Ccdc85a	0.00144968	2.97174	0.015	0.001	1
Brip1	1.44306e-19	2.96849	0.133	0.02	2.88396e-15
Dach1	0.0050956	2.96598	0.015	0.003	1
Mylk4	7.23597e-81	2.94836	0.46	0.093	1.44611e-76
Cmtm8	1.51549e-09	2.92187	0.066	0.011	3.02872e-05
Gm26808	0.0123808	2.90808	0.01	0.001	1
Tes	1.46482e-59	2.89453	0.362	0.066	2.92745e-55
Pgr	1.41146e-08	2.85074	0.054	0.008	0.000282081
Gm5532	0.0033454	2.82028	0.018	0.004	1
2810433D01Rik	0.000295468	2.80079	0.024	0.004	1
Thbs1	2.71313e-285	-3.76122	0.06	0.569	5.4222e-281
Myoz2	1.70659e-17	2.77942	0.117	0.017	3.41063e-13
Mlxipl	0.00191958	2.77896	0.017	0.003	1
Dsp	3.74803e-55	2.77777	0.34	0.06	7.49043e-51
Osr1	1.05923e-88	2.75447	0.496	0.1	2.11687e-84
Tnfrsf21	0.000145751	2.7531	0.026	0.004	1
Gal3st3	9.63674e-24	2.71567	0.169	0.03	1.9259e-19
Apobr	0.00167737	2.70283	0.017	0.003	1
Pgam2	9.11706e-177	-3.57168	0.055	0.414	1.82204e-172
Ccdc88c	0.000594649	2.67933	0.028	0.008	1
Tmem108	3.11941e-12	2.67711	0.091	0.018	6.23413e-08
4930579P08Rik	1.20856e-05	2.66072	0.036	0.006	0.241532
Rab17	6.14102e-05	2.65616	0.028	0.004	1
Tub	4.40869e-15	2.63292	0.122	0.028	8.81077e-11
Gm26771	0.000189699	2.63187	0.029	0.006	1
Frmd8os	0.00848631	2.6243	0.011	0.001	1
Irx5	0.000788076	2.61557	0.022	0.004	1
Bmpr1b	2.10938e-12	2.61545	0.092	0.018	4.2156e-08
Mpped2	2.19471e-09	2.60917	0.069	0.014	4.38612e-05
Irx3	2.53955e-08	2.59189	0.057	0.01	0.000507528
Trim16	1.20211e-05	2.59049	0.046	0.013	0.240241
Fam84a	5.85164e-16	2.58648	0.127	0.028	1.16945e-11
Kcnip4	1.36869e-13	2.56827	0.102	0.02	2.73533e-09
2210407C18Rik	4.38592e-63	2.56306	0.406	0.089	8.76526e-59
Krt80	8.02319e-05	2.56046	0.031	0.006	1
Mhrt	0.00789027	2.55835	0.016	0.004	1
Trnp1	5.39723e-15	2.55196	0.123	0.029	1.07864e-10
Ccdc65	0.00847667	2.54572	0.011	0.001	1
Ptprn	3.59329e-09	2.54285	0.064	0.011	7.18118e-05
Hoxa1	0.00191386	2.50845	0.022	0.005	1
Slc16a4	0.00749703	2.5037	0.012	0.001	1
Adcy1	4.43274e-33	2.5029	0.252	0.058	8.85884e-29
Mybpc2	0.00351859	2.50281	0.013	0.001	1
Isl1	0.00240408	2.49452	0.025	0.008	1
Ppef1	1.78991e-15	2.47022	0.115	0.022	3.57714e-11
Emb	1.0168e-72	2.46564	0.468	0.119	2.03208e-68
Pdzrn4	5.59499e-07	2.46084	0.054	0.013	0.0111816
Piezo2	0.000172087	2.44805	0.034	0.009	1
4930417O22Rik	0.00657822	2.44734	0.014	0.003	1
Hoxa4	5.71195e-09	2.44356	0.059	0.009	0.000114153
Cd74	0.00046267	2.43414	0.125	0.084	1
Actn2	1.36963e-07	2.42799	0.051	0.009	0.00273721
Cldn3	6.11177e-07	2.423	0.056	0.014	0.0122144
Trim58	0.00278422	2.40976	0.016	0.003	1
Col19a1	4.80152e-06	2.38382	0.047	0.011	0.0959584
Tdrp	0.00747832	2.38332	0.014	0.003	1
Bche	1.57264e-15	2.33368	0.115	0.022	3.14291e-11
Adcy7	6.14725e-21	2.32723	0.181	0.048	1.22853e-16
Tox2	0.00212805	2.31423	0.019	0.004	1
Gm17218	0.0066535	2.31196	0.014	0.003	1
Lrrc38	0.00280038	2.30987	0.016	0.003	1
Gm16701.1	0.00130834	2.2931	0.02	0.004	1
Prdm6	9.65144e-48	2.2843	0.35	0.088	1.92884e-43
Eppk1	7.84016e-05	2.27028	0.036	0.009	1
Vstm2b	0.00112313	2.26346	0.025	0.006	1
Adra1a	0.00515132	2.24228	0.013	0.001	1
Olfr330	0.000808234	2.23378	0.022	0.004	1
Tpd52l1	4.42593e-31	2.22935	0.247	0.058	8.84523e-27
Stil	0.0142272	2.21073	0.01	0.001	1
Kcnj15	1.42965e-16	2.20277	0.126	0.025	2.85715e-12
Cxxc4	0.0128274	2.19359	0.015	0.004	1
Sema3d	4.85204e-31	2.1917	0.252	0.062	9.69679e-27
Ly6g6d	0.00460338	2.17985	0.015	0.003	1
Gja4	2.01073e-150	-3.32407	0.058	0.385	4.01844e-146
Cntn1	4.94771e-05	2.16621	0.031	0.005	0.988799
Spsb4	0.00110291	2.16363	0.025	0.006	1
Nipal2	1.98335e-17	2.14586	0.153	0.041	3.96372e-13
Camk2b	1.13951e-09	2.1402	0.078	0.018	2.27732e-05
Ust	6.23885e-07	2.12253	0.06	0.017	0.0124683
Nkain2	0.00242015	2.11153	0.014	0.001	1
Lpl	9.86529e-76	-3.17654	0.032	0.211	1.97158e-71
Aqp1	7.83564e-29	2.1063	0.235	0.058	1.56595e-24
Zfp709	0.0429484	2.09779	0.01	0.003	1
2210010C04Rik	0.0125644	2.09576	0.01	0.001	1
Cacna1d	2.45322e-17	2.08773	0.17	0.053	4.90276e-13
Shd	0.0208135	2.07558	0.014	0.004	1
Ppp1r36	0.00132214	2.07342	0.02	0.004	1
Slc38a1	2.71409e-20	2.06958	0.19	0.056	5.42411e-16
Pln	5.7316e-135	-3.11076	0.19	0.564	1.14546e-130
Hoxaas3	0.00134575	2.06178	0.018	0.003	1
Hotairm1	1.00227e-46	2.05079	0.372	0.109	2.00304e-42
Foxf1	7.00782e-11	2.05021	0.092	0.023	1.40051e-06
Shroom4	0.010136	2.04956	0.015	0.004	1
Ndp	0.0030893	2.01148	0.018	0.004	1
Ric3	5.7706e-07	2.0032	0.054	0.013	0.0115325
Sncg	3.45925e-93	-3.10878	0.08	0.338	6.91331e-89
Xylt1	0.000310984	1.99897	0.038	0.013	1
4930447C04Rik	5.2712e-05	1.99815	0.037	0.009	1
Sphkap	5.13778e-16	1.97412	0.155	0.047	1.02678e-11
Aass	5.01926e-05	1.97296	0.039	0.01	1
Npy4r	0.000189703	1.95913	0.027	0.005	1
Tnc	1.20234e-10	1.95744	0.101	0.029	2.40288e-06
Bik	1.13528e-17	1.94976	0.174	0.053	2.26885e-13
Nrap	0.00520002	1.93872	0.015	0.003	1
Naalad2	4.58851e-84	-2.84605	0.032	0.226	9.17014e-80
Gm29107	0.0208421	1.92226	0.014	0.004	1
Cdkl5	1.91854e-20	1.91016	0.206	0.067	3.83421e-16
Htr1b	1.84383e-18	1.90669	0.182	0.057	3.6849e-14
D830026I12Rik	0.0772681	1.90187	0.01	0.004	1
Ano1	1.97222e-29	1.89289	0.275	0.085	3.94147e-25
Pamr1	7.33147e-21	1.89125	0.216	0.074	1.46519e-16
Inha	0.018485	1.88776	0.01	0.001	1
Gja1	4.39352e-36	1.88726	0.352	0.127	8.78044e-32
Tmtc2	8.41496e-17	1.88272	0.167	0.052	1.68173e-12
Gm30556	3.90855e-05	1.87381	0.029	0.004	0.781123
Ltbp2	4.5808e-12	1.87216	0.128	0.042	9.15472e-08
Hacd4	7.24503e-14	1.87189	0.161	0.061	1.44792e-09
Sh3rf2	0.000128485	1.86571	0.042	0.014	1
Rbm20	0.00439424	1.86332	0.024	0.008	1
Pdlim4	4.54471e-38	1.86139	0.349	0.114	9.08261e-34
Fbxo40	1.48671e-09	1.86066	0.096	0.03	2.97119e-05
Gm32036	0.000487428	1.85593	0.025	0.005	1
Cyp26b1	0.0487028	1.84647	0.01	0.003	1
2900055J20Rik	2.86384e-05	1.84475	0.042	0.011	0.572339
Cdh18	0.0140694	1.83955	0.019	0.006	1
Rab33a	0.0411162	1.83933	0.014	0.005	1
Gxylt2	1.93378e-40	1.83811	0.357	0.113	3.86465e-36
H2-Ab1	0.00115913	1.8368	0.047	0.022	1
Limch1	9.80539e-54	1.83548	0.464	0.169	1.95961e-49
Slc15a2	9.11389e-05	1.83028	0.038	0.01	1
Sntg1	0.000346132	1.83009	0.026	0.005	1
Col15a1	6.47001e-69	1.82522	0.541	0.191	1.29303e-64
Tmem82	1.22285e-07	1.82104	0.083	0.029	0.00244387
Tanc2	3.69516e-10	1.81773	0.124	0.048	7.38478e-06
Hoxb3	8.75463e-09	1.81279	0.088	0.028	0.000174961
Nrtn	5.86567e-33	1.80879	0.331	0.119	1.17225e-28
Adra1b	0.000371587	1.80741	0.038	0.013	1
Rab9b	0.0335293	1.80236	0.01	0.003	1
Elmo1	3.48231e-10	1.79476	0.097	0.028	6.95941e-06
Gm30524	0.0378394	1.79458	0.01	0.003	1
Whrn	0.000155425	1.79119	0.04	0.013	1
Unc5d	0.0235863	1.7865	0.013	0.004	1
Gja6	0.000248999	1.77729	0.041	0.014	1
Slc46a1	0.0057566	1.77581	0.019	0.005	1
Cgref1	0.000288146	1.76837	0.042	0.015	1
Elmo3	0.0512771	1.76283	0.013	0.005	1
Dnah5	0.0735643	1.76051	0.014	0.006	1
Syt3	0.0486085	1.75504	0.01	0.003	1
Kcnq5	0.0176291	1.75352	0.018	0.006	1
Ampd3	0.0228818	1.74801	0.019	0.008	1
Thsd4	5.05556e-44	1.74673	0.448	0.192	1.01035e-39
Bdnf	3.40652e-22	1.74076	0.24	0.084	6.80792e-18
Ifi47	0.00354028	1.73666	0.028	0.01	1
Hoxb2	1.06866e-21	1.73488	0.218	0.07	2.13571e-17
Npr3	3.22274e-09	1.72923	0.087	0.025	6.44064e-05
Eif2c5	0.0483353	1.72651	0.012	0.004	1
H2-DMb1	4.76077e-06	1.72365	0.063	0.022	0.0951439
Akap5	3.79315e-05	1.72005	0.048	0.015	0.758061
Nr1d1	1.04741e-13	1.7172	0.16	0.06	2.09325e-09
Gchfr	0.00890404	1.71544	0.02	0.006	1
Tulp1	0.00115584	1.70652	0.033	0.011	1
Susd4	0.00278672	1.69736	0.019	0.004	1
Hoxa3	2.64236e-25	1.69338	0.252	0.081	5.28075e-21
Agtr1a	1.41781e-06	1.69213	0.056	0.015	0.0283349
Trim6	1.42415e-05	1.68891	0.042	0.01	0.284617
Psme2b	0.0236509	1.68204	0.013	0.004	1
Malt1	2.36974e-06	1.67256	0.075	0.029	0.0473593
B230312C02Rik	0.0686915	1.67049	0.011	0.004	1
Stx1a	1.57543e-15	1.66477	0.166	0.056	3.1485e-11
Sema3b	1.95201e-18	1.66473	0.22	0.085	3.90109e-14
Sema3e	1.08362e-05	1.66455	0.049	0.014	0.216561
Ovca2	0.0430637	1.66346	0.01	0.003	1
Slc6a7	0.0977842	1.64256	0.01	0.004	1
Kcnd3	1.7124e-05	1.63456	0.048	0.014	0.342223
Shank1	2.36852e-07	1.63112	0.097	0.041	0.00473349
Cep78	0.0422071	1.62465	0.023	0.011	1
Zcchc18	0.00328149	1.62206	0.02	0.005	1
Htr2a	0.00866326	1.62025	0.029	0.013	1
Ppfia4	0.0347174	1.61796	0.016	0.006	1
Adhfe1	3.46671e-05	1.61447	0.044	0.013	0.692821
Tmem215	1.98751e-81	-2.82035	0.034	0.227	3.97203e-77
Casq1	2.7762e-05	1.59875	0.056	0.02	0.554824
Srp54c	0.0538052	1.59264	0.017	0.008	1
Gm9951	0.00214537	1.59136	0.029	0.01	1
Ptchd4	0.00981496	1.58762	0.013	0.003	1
C1qtnf6	8.61069e-08	1.58154	0.11	0.048	0.00172085
H2-Aa	0.00550561	1.57296	0.034	0.015	1
Dapk2	8.15529e-16	1.56769	0.179	0.064	1.62983e-11
Mcpt4	0.744202	1.56512	0.01	0.009	1
Rpusd2	0.0261521	1.56469	0.011	0.003	1
Mgat4a	1.89336e-21	1.56347	0.266	0.112	3.78388e-17
Saxo2	0.00485925	1.5607	0.025	0.009	1
Alox5ap	0.00475669	1.55895	0.025	0.009	1
Cdo1	8.90908e-37	1.55782	0.393	0.155	1.78048e-32
Tmem117	9.43006e-05	1.55351	0.058	0.024	1
Creb5	1.84036e-25	1.55332	0.288	0.109	3.67795e-21
Mthfd2	2.27298e-10	1.55304	0.11	0.037	4.54256e-06
Palld	4.33795e-267	-2.7868	0.464	0.905	8.66939e-263
Slc25a34	1.01749e-07	1.54483	0.088	0.032	0.00203344
Erbb4	1.90394e-05	1.53466	0.05	0.015	0.380502
Rhobtb1	8.6697e-18	1.53101	0.227	0.091	1.73264e-13
Zdhhc23	0.0144364	1.53092	0.024	0.01	1
Aldh1l1	0.0381744	1.52621	0.01	0.003	1
Slc25a26	2.81336e-05	1.51954	0.056	0.02	0.56225
Slc24a3	3.04789e-19	1.51424	0.22	0.08	6.0912e-15
Enpep	1.03534e-176	-2.78332	0.132	0.569	2.06913e-172
Zfp985	0.00869597	1.51147	0.014	0.003	1
D2hgdh	0.0236914	1.50825	0.023	0.01	1
Shroom3	8.70425e-09	1.50761	0.093	0.03	0.000173954
Tnik	4.18514e-10	1.50419	0.117	0.042	8.364e-06
4631405J19Rik	7.17122e-08	1.4993	0.103	0.042	0.00143317
Cyb561	3.05381e-16	1.495	0.192	0.07	6.10304e-12
Nudt8.1	0.0463618	1.48569	0.014	0.005	1
Efs	9.09733e-09	1.48397	0.11	0.043	0.00018181
Lrrc75b	0.0919417	1.48042	0.014	0.006	1
Cldn22	1.56666e-05	1.47778	0.056	0.019	0.313097
Lrrc17	1.95272e-18	1.47732	0.223	0.085	3.90251e-14
Tmem154	0.0615039	1.47678	0.011	0.004	1
Bend5	0.0131583	1.47165	0.017	0.005	1
Hoxb3os	2.55456e-18	1.46968	0.224	0.086	5.10528e-14
Spata2l	0.00680637	1.46252	0.014	0.003	1
Gm26724	0.00263809	1.46221	0.033	0.013	1
Psd	3.69465e-09	1.45894	0.151	0.072	7.38376e-05
Lmo1	1.37421e-06	1.45256	0.081	0.032	0.0274636
Prrx2	0.266949	1.45067	0.027	0.02	1
Slc9a2	0.00946695	1.44843	0.025	0.01	1
Abca7	0.0870466	1.44703	0.019	0.01	1
Slc26a6	0.0208707	1.44365	0.016	0.005	1
Tmem26	0.053637	1.44323	0.015	0.006	1
Vwc2	1.40035e-13	1.44192	0.171	0.066	2.79861e-09
Sema3c	1.33476e-13	1.44183	0.165	0.062	2.66751e-09
Gldn	2.31826e-08	1.44055	0.118	0.051	0.000463304
Lrp3	1.83397e-07	1.43929	0.1	0.042	0.00366519
Dhrs11	0.00353314	1.43857	0.032	0.013	1
Zc3h12b	0.00394152	1.43842	0.038	0.018	1
Cpxm2	3.22978e-73	-2.78075	0.044	0.238	6.45471e-69
Rasd1	2.61055e-59	-2.74917	0.047	0.217	5.21718e-55
Vcan	1.25946e-11	1.42457	0.162	0.069	2.51703e-07
Trim13	0.0103367	1.42452	0.023	0.009	1
Wnt16	3.58127e-35	1.42438	0.427	0.193	7.15716e-31
Gm8113	0.0649509	1.42335	0.013	0.005	1
Antxr2	1.74413e-16	1.41279	0.236	0.107	3.48564e-12
Snx32	1.5709e-06	1.41264	0.085	0.036	0.0313944
AL590144.3	0.00381976	1.41036	0.026	0.009	1
Prkd1	1.80275e-06	1.40794	0.078	0.03	0.036028
Osbpl3	4.14743e-19	1.40768	0.269	0.122	8.28864e-15
Btc	0.000197173	1.4061	0.042	0.014	1
Itgb3	7.80411e-09	1.40482	0.149	0.074	0.000155965
Slc22a17	0.00024781	1.40374	0.067	0.033	1
Alpk2	0.0613451	1.3959	0.011	0.004	1
Adam33	1.04162e-24	1.39486	0.315	0.136	2.08168e-20
Pnpla7	0.0148583	1.39416	0.015	0.004	1
Gm47547	0.00346814	1.39258	0.03	0.011	1
Dcn	1.59358e-25	-2.66843	0.375	0.521	3.18476e-21
H2al1k	0.0432317	1.38785	0.01	0.003	1
Atrnl1	6.03277e-06	1.38388	0.08	0.034	0.120565
Itga4	2.4169e-06	1.38131	0.081	0.033	0.0483017
Itih2	1.48761e-06	1.37907	0.107	0.052	0.0297299
Ptprj	3.4375e-06	1.37772	0.088	0.039	0.0686984
Alx1	0.00573469	1.37734	0.027	0.01	1
Alcam	2.27394e-30	1.37634	0.357	0.142	4.54446e-26
Pik3r6	0.030219	1.37393	0.013	0.004	1
Phgdh	0.000398483	1.37073	0.057	0.027	1
Zfp872	0.0341805	1.3697	0.013	0.004	1
Doc2g	0.0540118	1.36829	0.019	0.009	1
Arsg	0.0159255	1.36538	0.018	0.006	1
Hcls1	0.00151084	1.35622	0.026	0.008	1
Cmya5	0.0330313	1.35423	0.02	0.009	1
Ptpru	0.0764092	1.35368	0.024	0.014	1
Abcc10	0.0229512	1.35036	0.019	0.008	1
Slc25a33	0.000676288	1.35016	0.061	0.03	1
Igsf9b	1.55881e-14	1.35007	0.246	0.125	3.11529e-10
Uaca	2.36075e-08	1.34392	0.115	0.048	0.000471795
Lnx1	0.00038688	1.34082	0.063	0.03	1
Wdr95	0.000282085	1.34041	0.055	0.024	1
Chrnb1	8.11822e-05	1.33957	0.066	0.029	1
Myh6	0.0485069	1.33402	0.015	0.006	1
Gabre	1.171e-05	1.33252	0.087	0.041	0.234024
Phactr3	0.0598905	1.33226	0.015	0.006	1
Sfrp2	3.85728e-10	1.33108	0.115	0.041	7.70878e-06
Tmem254a	0.0648997	1.3298	0.013	0.005	1
E530011L22Rik	0.00317747	1.32911	0.026	0.009	1
Atp6ap1l	0.0590876	1.32731	0.02	0.01	1
Mterf1b	0.0390072	1.32669	0.016	0.006	1
Gm42670	0.0149415	1.32493	0.017	0.005	1
Igfbp5	3.64355e-35	-2.62853	0.064	0.201	7.28163e-31
Ccdc42	1.16043e-12	1.31947	0.196	0.09	2.31913e-08
Gm9885	6.71068e-06	1.31807	0.086	0.039	0.134113
Notch3	9.83187e-85	-2.48453	0.095	0.356	1.9649e-80
Atm	5.09597e-05	1.31724	0.056	0.022	1
Sfxn2	2.74108e-05	1.31696	0.07	0.03	0.547805
Mettl24	3.2134e-13	1.31675	0.213	0.103	6.42198e-09
H2-Eb1	0.014568	1.30865	0.046	0.027	1
Rgs7	0.000154428	1.30685	0.046	0.017	1
Pvt1	0.0429609	1.30681	0.031	0.018	1
Hps6	0.00623741	1.3067	0.025	0.009	1
Gm17477	0.0138016	1.3038	0.021	0.008	1
Rab26	0.037254	1.30375	0.014	0.005	1
Maf	8.09345e-11	1.302	0.172	0.08	1.61748e-06
Ldb2	3.16499e-09	1.29865	0.122	0.05	6.32523e-05
Col8a1	1.45076e-93	-2.42875	0.075	0.338	2.89935e-89
Tspan15	0.0212458	1.29189	0.019	0.008	1
Pigz	0.150493	1.29064	0.014	0.008	1
Hoxa2	0.0042968	1.28907	0.029	0.011	1
Zfp169	0.0986412	1.28631	0.01	0.004	1
Garem1	0.0102012	1.28566	0.037	0.019	1
Fbxo36	0.0048691	1.28445	0.031	0.013	1
Gga2	8.46878e-15	1.28416	0.237	0.116	1.69249e-10
Fitm2	0.000262914	1.28367	0.062	0.029	1
Col4a6	1.17253e-24	1.28202	0.38	0.194	2.34331e-20
Skap2	7.98655e-24	1.28071	0.335	0.155	1.59611e-19
Plppr2	0.0824147	1.28042	0.014	0.006	1
Hoxb4	0.000475949	1.279	0.06	0.029	1
Pcsk5	1.073e-06	1.27603	0.099	0.044	0.021444
Trim63	0.0408943	1.27498	0.018	0.008	1
Il17b	1.72141e-05	1.27452	0.07	0.029	0.344025
Upb1	0.00339247	1.27159	0.032	0.013	1
F11r	2.50204e-05	1.26941	0.065	0.027	0.500034
Gm10645	0.111051	1.26852	0.01	0.004	1
Thsd7b	0.0694886	1.26817	0.011	0.004	1
Tmem132a	1.55086e-09	1.26692	0.169	0.085	3.09939e-05
Nebl	0.00968387	1.26499	0.036	0.018	1
Apoe	4.59629e-61	-2.39195	0.272	0.522	9.18569e-57
4732414G09Rik	0.0384858	1.26445	0.016	0.006	1
4833413G10Rik	0.113347	1.26329	0.013	0.006	1
Unc5c	1.93681e-08	1.26324	0.148	0.074	0.000387071
Snhg20	3.88849e-06	1.26094	0.087	0.038	0.0777114
Ntn4	4.84268e-77	-2.35214	0.1	0.351	9.67811e-73
Arhgef3	2.30766e-06	1.25635	0.074	0.028	0.0461186
Myadml2	0.0585216	1.25631	0.013	0.005	1
Tnni3k	0.0172378	1.25596	0.031	0.015	1
Ccdc141	7.97877e-16	1.25359	0.236	0.105	1.59456e-11
Plcxd3	0.386455	1.25242	0.011	0.008	1
Fli1	7.25177e-05	1.25106	0.074	0.036	1
Gm12359	0.0545399	1.25097	0.019	0.009	1
Elf4	0.0196932	1.24811	0.022	0.009	1
Pik3c2b	0.00250689	1.24475	0.043	0.02	1
Cdh11	5.67063e-13	1.24411	0.198	0.09	1.13327e-08
Coq8a	4.31277e-11	1.2428	0.187	0.091	8.61906e-07
Tlr2	0.221579	1.24238	0.013	0.008	1
Wscd2	1.22588e-19	1.23943	0.331	0.175	2.44993e-15
Rtn4ip1	0.0361126	1.23559	0.018	0.008	1
Eef1a2	0.0148307	1.23313	0.015	0.004	1
Mdga1	0.000545026	1.23312	0.053	0.024	1
Cela1	0.0403363	1.22743	0.018	0.008	1
Sorbs2	3.42471e-99	-2.34575	0.543	0.755	6.84429e-95
Ccdc152	0.144775	1.22296	0.016	0.009	1
Prex1	0.196367	1.21874	0.01	0.005	1
D430036J16Rik	0.0202639	1.21763	0.018	0.006	1
Tspan5	5.71513e-21	1.21598	0.335	0.169	1.14217e-16
6720427I07Rik	0.0609435	1.21519	0.017	0.008	1
Hnmt	0.00010046	1.21393	0.083	0.043	1
Rarres1	4.19267e-45	-2.33049	0.055	0.207	8.37906e-41
Gen1	0.15786	1.21294	0.01	0.005	1
Pcsk4	0.210408	1.20978	0.011	0.006	1
Klhl11	0.0151554	1.20674	0.026	0.011	1
Armc7	0.327418	1.20629	0.013	0.009	1
Atp8a1	6.28133e-06	1.20594	0.072	0.028	0.125532
A430105I19Rik	4.80572e-11	1.20349	0.186	0.09	9.60423e-07
Pde1a	2.31292e-75	-2.28623	0.092	0.335	4.62238e-71
Mmp16	0.0030975	1.19716	0.049	0.025	1
A630023A22Rik	0.0337279	1.19313	0.01	0.003	1
Tigd5	0.0285987	1.18587	0.017	0.006	1
Igfbp2	1.69098e-05	1.18516	0.115	0.064	0.337942
Cxcl1	1.00412e-08	-2.25837	0.136	0.207	0.000200673
Arl4c	0.00158474	1.18143	0.04	0.017	1
Map9	0.036107	1.18003	0.023	0.011	1
Erg	0.0326381	1.16983	0.018	0.008	1
Mtx3	0.0143999	1.16957	0.022	0.009	1
Apobec2	0.00189687	1.16636	0.037	0.015	1
Tmsb15b1	0.0122814	1.16568	0.025	0.01	1
Kcnn1	0.140508	1.16285	0.013	0.006	1
St3gal5	1.32636e-24	1.16227	0.369	0.183	2.65074e-20
Pm20d2	0.0754744	1.16098	0.016	0.008	1
Arl10	0.00244586	1.1594	0.04	0.018	1
Rab6b	0.00209758	1.15883	0.022	0.005	1
1500011B03Rik	0.000847181	1.15752	0.065	0.034	1
9930111J21Rik2	4.27108e-06	1.15358	0.076	0.03	0.0853575
Chrd	0.000189237	1.15183	0.068	0.033	1
Mlxip	0.000624621	1.15017	0.071	0.038	1
Hemk1	0.0672837	1.15011	0.018	0.009	1
Ankrd44	2.70124e-05	1.14988	0.113	0.064	0.539844
Galc	0.0132657	1.14766	0.019	0.006	1
Ppm1j	0.0331439	1.1461	0.037	0.022	1
Gm15690	0.0833385	1.141	0.014	0.006	1
Gstm7	5.20402e-10	1.13963	0.172	0.084	1.04002e-05
Kif26b	0.0540708	1.13914	0.025	0.014	1
Tnnt2	4.93428e-06	1.13782	0.231	0.163	0.0986116
Gm10561	4.11331e-07	1.13747	0.137	0.072	0.00822046
Neil1	0.0137861	1.1365	0.028	0.013	1
Lrrc56	0.0406314	1.13443	0.021	0.01	1
Park2	0.00885377	1.13357	0.036	0.018	1
Ankrd1	7.15253e-32	-2.24542	0.12	0.272	1.42943e-27
Ngef	0.000324532	1.13212	0.055	0.024	1
Tnfrsf11b	9.74503e-20	1.13093	0.321	0.159	1.94754e-15
Gm16536	0.00246999	1.12746	0.052	0.027	1
Thg1l	0.00020927	1.12636	0.07	0.034	1
Fam174b	0.0124847	1.12525	0.028	0.013	1
Ikbkg	0.00210518	1.12315	0.067	0.038	1
Reep2	0.00593798	1.12162	0.036	0.017	1
Lrrc51	0.0225593	1.12132	0.025	0.011	1
Flywch2	0.0017403	1.12066	0.069	0.039	1
Abcc9	4.90166e-11	1.12026	0.172	0.078	9.79596e-07
Napepld	5.39059e-16	1.11962	0.288	0.149	1.07731e-11
C1s1	1.69313e-126	-2.23097	0.18	0.56	3.38373e-122
Ttll4	0.132959	1.11931	0.019	0.011	1
Gabra3	3.57949e-13	1.11821	0.265	0.146	7.15361e-09
Adamts9	0.00641278	1.11614	0.052	0.029	1
9030624G23Rik	0.113535	1.11341	0.02	0.011	1
Timp4	6.64156e-05	1.1081	0.099	0.055	1
Mtss1	5.84767e-12	1.10762	0.218	0.111	1.16866e-07
Cnr1	0.0466444	1.10455	0.014	0.005	1
Tmem176a	8.12693e-76	-2.18038	0.089	0.33	1.62417e-71
Smim3	8.15288e-13	1.10043	0.247	0.131	1.62935e-08
Cds1	0.0794011	1.09982	0.019	0.01	1
Ston2	0.243949	1.09808	0.013	0.008	1
Pgm2	1.11829e-06	1.09609	0.13	0.069	0.022349
Ndst3	0.0532016	1.09586	0.022	0.011	1
Gm15737	0.0552078	1.09512	0.011	0.004	1
Slc6a9	0.000216762	1.09395	0.089	0.05	1
Galnt16	2.82791e-13	1.0933	0.238	0.121	5.65159e-09
Trim2	1.69758e-77	-2.14898	0.105	0.362	3.39261e-73
Nap1l5	0.020559	1.08956	0.04	0.023	1
Crhr2	1.09894e-05	1.08895	0.118	0.065	0.219622
Pycr1	1.51601e-05	1.0845	0.069	0.028	0.302975
Atp10a	1.66312e-05	1.08322	0.131	0.078	0.332375
Fam135a	2.55779e-10	1.08231	0.181	0.089	5.11174e-06
Gm15952	0.0268548	1.08152	0.015	0.005	1
Gdpd5	7.88172e-05	1.07965	0.08	0.039	1
Chd3	3.44127e-22	1.07623	0.369	0.193	6.87737e-18
Ankrd52	0.0315091	1.07615	0.027	0.014	1
Gm4117	0.00053746	1.07535	0.065	0.033	1
Osbpl6	0.00205033	1.07304	0.046	0.022	1
Arhgap32	0.0010815	1.07283	0.06	0.03	1
Lgr6	5.29197e-17	1.07249	0.331	0.187	1.0576e-12
Lhpp	0.00207663	1.0719	0.059	0.032	1
Tsc22d3	1.03889e-66	-2.04884	0.166	0.431	2.07622e-62
Dhodh	0.000412593	1.07029	0.071	0.037	1
Rhou	5.8628e-07	1.06968	0.128	0.065	0.0117168
Lancl3	2.72549e-08	1.06897	0.159	0.083	0.000544689
Gm15860	0.063937	1.06878	0.022	0.011	1
Myoz1	0.00467864	1.06674	0.024	0.008	1
Gpsm2	2.75296e-09	1.06603	0.133	0.056	5.50178e-05
Focad	0.0814421	1.06443	0.029	0.018	1
Otub2	0.0365963	1.06087	0.02	0.009	1
Ky	0.308597	1.05915	0.015	0.01	1
Hoxb5	0.0489866	1.05806	0.01	0.003	1
Helb	0.0787143	1.05754	0.032	0.02	1
A930004D18Rik	0.0187758	1.05726	0.025	0.011	1
Gm20655	0.040442	1.05554	0.023	0.011	1
A930033H14Rik	0.00117884	1.05545	0.04	0.017	1
Slc16a10	0.0345374	1.05499	0.038	0.023	1
Fuca2	0.000148036	1.05282	0.068	0.032	1
P2rx5	3.63337e-07	1.05249	0.145	0.078	0.00726129
Rab27b	1.33172e-06	1.05161	0.142	0.08	0.0266144
Schip1	1.00033e-05	1.05088	0.126	0.071	0.199916
Mlf1	7.63228e-49	-2.03683	0.081	0.262	1.52531e-44
Msx1	4.39799e-62	-2.02202	0.117	0.351	8.78937e-58
Tesk2	0.167029	1.04935	0.014	0.008	1
Ntng1	0.0126383	1.04716	0.032	0.015	1
Cyp2j6	0.0244187	1.04627	0.021	0.009	1
Slc35c1	0.054437	1.04575	0.02	0.01	1
Nrp2	0.00433346	1.0444	0.043	0.022	1
Smad9	0.000628322	1.0443	0.066	0.034	1
Setd6	8.13429e-08	1.04197	0.169	0.094	0.00162564
Stk10	0.0202354	1.04146	0.04	0.023	1
Fzd6	0.00405818	1.03925	0.057	0.032	1
Flnc	1.64805e-08	1.03615	0.175	0.094	0.000329362
Rab32	0.0125363	1.03328	0.038	0.02	1
Zfp760	0.0706567	1.03206	0.021	0.011	1
Serpinf1	2.50158e-34	-2.00407	0.178	0.36	4.99941e-30
Svip	1.03667e-08	1.02929	0.188	0.104	0.000207179
Hspa1l	0.335794	1.02755	0.019	0.014	1
Ace	2.10278e-18	1.02535	0.306	0.149	4.20242e-14
Aacs	0.00357262	1.02328	0.039	0.018	1
Nrgn	1.22575e-06	1.02288	0.091	0.038	0.0244965
Eva1a	0.0130141	1.02168	0.035	0.018	1
Bicdl1	0.00120897	1.01919	0.054	0.027	1
Nyap1	0.0168873	1.01919	0.026	0.011	1
Zfp287	0.0421262	1.01906	0.021	0.01	1
Fhl2	2.66507e-116	-1.96193	0.236	0.609	5.32614e-112
Lrrc27	0.0412421	1.01836	0.023	0.011	1
Sema3f	2.53339e-15	1.01626	0.331	0.194	5.06297e-11
Klc3	1.40574e-05	1.01592	0.092	0.044	0.280938
Efhc2	0.00287269	1.01537	0.05	0.025	1
Eps8l2	0.00228679	1.01359	0.076	0.046	1
Ccdc42os	0.191924	1.01222	0.012	0.006	1
Etohd2	0.0354506	1.01215	0.016	0.006	1
Intu	0.0921441	1.00901	0.012	0.005	1
Esr1	0.00146309	1.00496	0.047	0.022	1
Pdgfc	0.00150456	1.00146	0.081	0.048	1
Med9os	0.313903	1.00071	0.01	0.006	1
Gm45670	7.67652e-05	0.999953	0.099	0.055	1
Cdc14a	0.000319973	0.999372	0.057	0.025	1
CT025619.1	4.03776e-13	0.999196	0.291	0.17	8.06946e-09
Tctn1	0.0873615	0.998964	0.028	0.018	1
B3galt1	8.54908e-08	0.997357	0.176	0.099	0.00170853
Raver2	0.0279358	0.996093	0.031	0.017	1
Rnf213	0.0727711	0.995261	0.019	0.01	1
Cand2	0.24971	0.994206	0.023	0.017	1
Xlr3b	0.0137476	0.99267	0.038	0.02	1
Itga8	1.65309e-127	0.99026	0.977	0.873	3.30371e-123
Pgm5	1.47049e-15	0.989113	0.311	0.174	2.93878e-11
Frrs1	0.0167896	0.988981	0.029	0.014	1
Glb1	0.0234037	0.988487	0.036	0.02	1
Rfx1	0.0089115	0.987732	0.04	0.02	1
Jag2	0.337127	0.987438	0.017	0.013	1
Gpd1	0.00756485	0.98728	0.018	0.005	1
Ctcflos	0.0750229	0.985668	0.014	0.006	1
H2-Q7	0.0948686	0.985194	0.028	0.018	1
Optc	5.43943e-26	0.981848	0.528	0.334	1.08707e-21
Slc22a1	9.34364e-50	0.981769	0.731	0.488	1.86733e-45
Platr25	0.00539719	0.978779	0.038	0.018	1
Dkk3	1.34129e-37	0.978611	0.518	0.255	2.68057e-33
Rbp4	4.66951e-45	0.977178	0.52	0.221	9.33201e-41
P2ry6	0.00166709	0.973832	0.05	0.024	1
Hist1h4n	0.354831	0.973809	0.011	0.008	1
Ihh	0.000350309	0.971989	0.075	0.039	1
Slc12a7	0.00608446	0.969413	0.028	0.011	1
Tmem150a	1.54117e-07	0.969166	0.206	0.127	0.00308003
Prelid2	0.000290985	0.968347	0.075	0.039	1
Gm26882	0.065285	0.966741	0.013	0.005	1
8030462N17Rik	0.0758875	0.965439	0.016	0.008	1
Rcbtb1	0.000569644	0.964641	0.099	0.061	1
Fjx1	2.64776e-09	0.964609	0.217	0.125	5.29156e-05
Creld1	8.99753e-17	0.963776	0.345	0.196	1.79816e-12
Mettl4	0.151989	0.962267	0.022	0.014	1
C920021L13Rik	0.20319	0.961627	0.013	0.008	1
Fez1	0.126315	0.961571	0.018	0.01	1
Cep95	0.250502	0.95772	0.023	0.017	1
Polr3a	0.0211618	0.95678	0.051	0.032	1
Mlh1	0.113025	0.953531	0.02	0.011	1
Zfp612	8.12217e-06	0.953064	0.12	0.065	0.162322
Layn	0.00136417	0.951881	0.081	0.048	1
Gale	0.08627	0.950986	0.021	0.011	1
Eml5	0.125988	0.950094	0.015	0.008	1
Tmcc3	1.29377e-10	0.947374	0.19	0.093	2.5856e-06
Nalcn	0.00175752	0.945162	0.06	0.032	1
Frzb	4.49313e-06	0.94502	0.126	0.069	0.0897952
Gm5784	0.156816	0.944548	0.012	0.006	1
Tmeff1	0.313903	0.944487	0.01	0.006	1
Htra1	1.94384e-38	0.944237	0.751	0.588	3.88477e-34
Sirt4	0.000233918	0.943701	0.07	0.034	1
Pik3cb	6.97852e-05	0.943146	0.088	0.046	1
Ccdc60	0.0616106	0.940977	0.02	0.01	1
Ntn1	1.84294e-10	0.940517	0.254	0.149	3.68311e-06
2310040G07Rik	0.224403	0.939854	0.013	0.008	1
Oas1c	0.176823	0.939455	0.015	0.009	1
Gm45871	0.293153	0.936348	0.021	0.015	1
Itga5	4.49994e-09	0.936239	0.255	0.16	8.99313e-05
Popdc3	0.158675	0.93554	0.023	0.015	1
4933404O12Rik	0.0190431	0.932715	0.043	0.025	1
Tmem25	0.0381046	0.931868	0.014	0.005	1
Rbm12b2	0.00450022	0.927622	0.042	0.02	1
Nt5c3b	6.18091e-10	0.925465	0.212	0.116	1.23526e-05
Serpinb6b	1.66479e-17	0.925448	0.362	0.21	3.32707e-13
Bend4	0.0256668	0.925091	0.024	0.011	1
Soga1	0.0051747	0.92453	0.049	0.027	1
Abcc1	6.69691e-09	0.923739	0.205	0.116	0.000133838
B630019A10Rik	0.279351	0.922355	0.014	0.009	1
Itga6	0.114754	0.919443	0.011	0.005	1
Stk35	0.00229021	0.919005	0.059	0.032	1
Cd276	0.0276317	0.918402	0.026	0.013	1
Tenm3	0.0115152	0.918285	0.035	0.018	1
Chst10	0.501014	0.917457	0.012	0.009	1
Mid2	0.0217906	0.917365	0.063	0.042	1
Armc2	0.0104672	0.916756	0.036	0.018	1
Dmxl2	0.0218244	0.915887	0.04	0.023	1
Nfrkb	0.000104408	0.915411	0.106	0.061	1
Bcl2	2.3569e-20	0.91461	0.456	0.285	4.71026e-16
Tmem104	0.027068	0.914516	0.033	0.018	1
Epb41l4b	0.203738	0.913757	0.013	0.008	1
Trim7	0.0197085	0.91286	0.037	0.02	1
Sbk1	0.122358	0.912164	0.016	0.009	1
Xpo5	0.125705	0.912029	0.015	0.008	1
AL591952.3	0.168843	0.912026	0.014	0.008	1
Serinc5	0.00268299	0.911135	0.069	0.041	1
Adssl1	1.9143e-05	0.91086	0.143	0.088	0.382572
Fbxo30	1.05252e-15	0.90958	0.433	0.296	2.10346e-11
Ephb3	0.176815	0.909547	0.032	0.023	1
AY036118	8.13121e-07	0.90873	0.139	0.075	0.0162502
Acot11	0.00586249	0.907354	0.077	0.05	1
Xk	3.7447e-08	0.907338	0.219	0.135	0.000748378
Ext1	7.30726e-11	0.906603	0.255	0.146	1.46036e-06
Myrf	4.37978e-05	0.9065	0.105	0.057	0.875299
Gm21987	0.42468	0.90554	0.014	0.01	1
Nox4	2.11995e-38	0.903637	0.609	0.352	4.23673e-34
BC024978	0.016723	0.902823	0.042	0.024	1
Efna5	1.47819e-31	0.898905	0.568	0.334	2.95417e-27
Ulk4	0.126231	0.8971	0.015	0.008	1
Gramd1c	0.00590002	0.896647	0.023	0.008	1
Mmp15	0.22546	0.896635	0.013	0.008	1
Fbxo24	0.00864036	0.896567	0.031	0.014	1
Nedd9	6.88827e-15	0.896193	0.406	0.273	1.37662e-10
Slc1a4	0.0013519	0.896132	0.046	0.02	1
Ints3	3.45054e-07	0.895601	0.172	0.099	0.00689591
Chpf2	0.00893459	0.892513	0.083	0.056	1
Atp6v1a	1.15001e-27	0.892311	0.601	0.417	2.2983e-23
Nptxr	0.000588298	0.89049	0.095	0.057	1
Gm9780	0.0825967	0.890115	0.012	0.005	1
Daglb	4.21354e-05	0.889952	0.158	0.103	0.842076
Nes	8.50263e-11	0.889683	0.228	0.123	1.69925e-06
Wdr19	0.0802753	0.889086	0.024	0.014	1
C030014I23Rik	0.111874	0.888815	0.01	0.004	1
Map1a	2.07741e-13	0.888783	0.322	0.193	4.1517e-09
Klf5	0.263008	0.888466	0.015	0.01	1
Rad9b	0.266669	0.88799	0.017	0.011	1
Tacc3	0.092285	0.886468	0.012	0.005	1
Ttc12	0.000590805	0.886245	0.086	0.05	1
Nov	3.16868e-118	0.886144	0.992	0.872	6.33261e-114
Rhpn2	0.00788202	0.886045	0.026	0.01	1
Gria3	0.166271	0.885981	0.02	0.013	1
Astn2	0.0164408	0.88592	0.039	0.022	1
Fibin	1.45884e-23	0.885017	0.543	0.365	2.91549e-19
Brf1	0.0011648	0.884777	0.1	0.064	1
Qsox1	4.50652e-38	0.883555	0.708	0.515	9.00629e-34
Hus1	0.0053586	0.882901	0.048	0.025	1
Atp13a3	4.03434e-12	0.881638	0.297	0.175	8.06262e-08
Htra3	2.9478e-27	0.880733	0.323	0.118	5.89118e-23
Rsad1	0.0880531	0.879654	0.028	0.018	1
Dmpk	2.60524e-42	0.878409	0.741	0.557	5.20657e-38
Aox1	0.00845122	0.877558	0.046	0.025	1
Ppm1h	0.00570846	0.877038	0.051	0.028	1
Chst3	0.0103171	0.876911	0.046	0.025	1
Man2b1	5.90038e-16	0.876822	0.409	0.263	1.17919e-11
Manba	0.000845669	0.875289	0.081	0.047	1
Retsat	0.179036	0.874554	0.032	0.023	1
Slc38a7	0.00191163	0.874273	0.061	0.033	1
Clip4	5.01689e-07	0.873613	0.197	0.123	0.0100263
Gm48053	5.06518e-05	0.872948	0.065	0.028	1
Slc41a2	0.00833363	0.87249	0.036	0.018	1
Cpeb3	0.00036074	0.872167	0.082	0.044	1
AI839979	0.331658	0.87183	0.025	0.019	1
Pemt	0.156659	0.871426	0.012	0.006	1
Sept9	7.28e-09	0.870208	0.267	0.174	0.000145491
Pigg	0.0150854	0.868944	0.046	0.027	1
BC024063	0.0557933	0.868465	0.02	0.01	1
Gm15050	0.000149968	0.867984	0.07	0.033	1
Nphp3	0.0564808	0.86706	0.044	0.029	1
Fbxo2	0.0787761	0.866712	0.031	0.019	1
Ankrd50	0.118318	0.866618	0.047	0.034	1
Cfp	0.193105	0.86598	0.012	0.006	1
Rin3	0.0373466	0.864745	0.035	0.02	1
Usp53	1.62541e-06	0.864478	0.193	0.123	0.0324838
Mblac2	0.0119684	0.863239	0.048	0.028	1
Hspg2	5.69149e-36	0.862955	0.716	0.526	1.13744e-31
Rasd2	0.000489968	0.861901	0.035	0.011	1
Thnsl2	0.000572688	0.860399	0.089	0.052	1
Tle1	8.39864e-11	0.860066	0.325	0.217	1.67847e-06
Gm10516	0.197398	0.85931	0.01	0.005	1
Dlg2	0.000860731	0.858838	0.07	0.038	1
Zfp763	0.014435	0.856228	0.052	0.032	1
N6amt1	9.69355e-13	0.854129	0.323	0.199	1.93726e-08
St3gal2	1.72895e-11	0.853886	0.282	0.168	3.4553e-07
Ccdc8	0.061059	0.853872	0.051	0.036	1
2310015D24Rik	0.0995835	0.852748	0.037	0.025	1
Tbc1d9	0.000448489	0.852379	0.094	0.055	1
Cndp1	1.28035e-12	0.852362	0.325	0.199	2.55878e-08
Itln1	0.010599	0.852357	0.027	0.011	1
Plxdc2	2.07304e-26	0.852305	0.42	0.206	4.14297e-22
Zfp72	0.0444941	0.851337	0.033	0.019	1
Nudt11	0.0472427	0.850504	0.04	0.025	1
Izumo4	4.04324e-10	0.848896	0.256	0.152	8.08042e-06
Papss2	0.0194045	0.84854	0.065	0.043	1
Zfp9	0.000530551	0.848148	0.116	0.075	1
Clasp1	0.000164566	0.847413	0.128	0.081	1
Phyhd1	0.0263654	0.846861	0.031	0.017	1
Mreg	0.28061	0.844628	0.014	0.009	1
Gucd1	0.000326891	0.843764	0.098	0.057	1
Ermp1	0.0393774	0.84209	0.049	0.032	1
Slc27a4	0.00375588	0.841553	0.07	0.042	1
Gm9774	0.022641	0.841331	0.026	0.013	1
Gm47101	0.00621959	0.841167	0.034	0.015	1
Myo9b	1.45972e-08	0.840372	0.235	0.144	0.000291725
Rhbdl3	0.471639	0.838821	0.019	0.015	1
6720489N17Rik	0.0485459	0.838799	0.026	0.014	1
Fbxw10	0.10285	0.838756	0.026	0.017	1
Ctsd	4.61048e-79	0.838749	0.937	0.807	9.21404e-75
Cage1	0.112759	0.838279	0.028	0.018	1
Cbr2	7.21073e-42	0.836356	0.743	0.52	1.44106e-37
Adk	6.11048e-31	0.835908	0.653	0.449	1.22118e-26
Stk17b	1.96885e-08	0.835429	0.198	0.113	0.000393475
Zfp651	1.2285e-12	0.835194	0.363	0.236	2.45515e-08
G2e3	0.0024389	0.834919	0.059	0.032	1
Epha4	0.0166651	0.834896	0.038	0.02	1
Maml2	8.08816e-09	0.833677	0.227	0.135	0.000161642
Des	7.03128e-07	0.833444	0.409	0.348	0.014052
Ltbp4	4.12776e-67	0.832131	0.951	0.747	8.24933e-63
9530077C05Rik	2.85645e-05	0.831824	0.137	0.083	0.570861
BC022687	0.0363895	0.830744	0.035	0.02	1
Myl6b	0.0567347	0.830724	0.036	0.023	1
Lin7b	0.0932977	0.829969	0.015	0.008	1
Spg11	0.157283	0.82992	0.034	0.024	1
Flnb	0.000585529	0.829466	0.106	0.066	1
Lamc3	0.000108445	0.829394	0.132	0.083	1
Fam126b	1.56346e-07	0.829254	0.211	0.13	0.00312457
Rgs3	3.94449e-11	0.828478	0.313	0.199	7.88307e-07
Mthfd1	5.22393e-05	0.826763	0.127	0.076	1
Pigt	2.83407e-06	0.826761	0.197	0.128	0.0566388
Cdkl2	0.0120153	0.825836	0.039	0.02	1
Vps13a	8.02217e-06	0.825805	0.138	0.079	0.160323
Crlf2	0.00142347	0.824872	0.098	0.062	1
9230112J17Rik	6.15187e-05	0.822475	0.096	0.051	1
Fbxl19	0.130712	0.821859	0.021	0.013	1
Irf5	0.209619	0.821687	0.018	0.011	1
Fam198b	1.4221e-33	0.821309	0.653	0.424	2.84206e-29
Gnai1	5.9318e-38	0.820734	0.717	0.515	1.18547e-33
Tbc1d16	0.034714	0.820088	0.052	0.034	1
Phka2	0.00119627	0.819478	0.088	0.053	1
Dock4	0.00710919	0.81916	0.047	0.025	1
Ip6k2	8.33463e-06	0.81863	0.128	0.071	0.166568
Tmem86a	0.0249307	0.817916	0.047	0.029	1
Kcnq3	0.139353	0.816328	0.014	0.008	1
Gm28557	0.234628	0.816234	0.011	0.006	1
Hk2	5.3873e-08	0.815928	0.265	0.174	0.00107665
Dmd	2.65857e-39	0.814453	0.805	0.671	5.31316e-35
Gm15445	0.111645	0.814179	0.01	0.004	1
Cpz	0.0214246	0.814068	0.053	0.033	1
Ralgps1	0.0362687	0.812834	0.025	0.013	1
Gm26722	2.50944e-14	0.812544	0.359	0.22	5.01511e-10
Smyd2	8.56666e-06	0.811537	0.151	0.09	0.171205
Rnf150	0.0024541	0.811456	0.084	0.052	1
Zfp420	0.16398	0.811064	0.02	0.013	1
Evi5l	0.0263218	0.805462	0.039	0.023	1
Fgfbp3	0.084907	0.804471	0.014	0.006	1
Chd3os	0.316135	0.802374	0.01	0.006	1
Parp8	5.54958e-07	0.801816	0.218	0.141	0.0110908
Alg2	0.00607052	0.800095	0.076	0.048	1
Cyb5b	2.56994e-06	0.800068	0.183	0.114	0.0513602
Anln	5.78761e-20	0.799272	0.539	0.371	1.15665e-15
Zbtb5	0.0608733	0.79919	0.027	0.015	1
Med12l	0.139221	0.79786	0.014	0.008	1
Klf12	0.0715035	0.797434	0.029	0.018	1
Nfe2l3	0.192483	0.797077	0.012	0.006	1
Zfp518b	0.061017	0.796761	0.035	0.022	1
Adam19	0.00139333	0.795485	0.064	0.034	1
Plcb1	1.05277e-10	0.795413	0.327	0.216	2.10397e-06
Col4a5	3.22256e-19	0.794094	0.503	0.342	6.44029e-15
Abca2	4.3246e-05	0.793954	0.133	0.08	0.864271
Chek2	0.0703326	0.792903	0.023	0.013	1
Primpol	0.0423333	0.792327	0.038	0.023	1
Ptdss1	0.000938171	0.790487	0.099	0.062	1
Rpgrip1l	0.0353703	0.790264	0.035	0.02	1
Glipr1	3.39907e-10	0.789863	0.287	0.178	6.79303e-06
Mmp17	2.84267e-08	0.789614	0.257	0.166	0.000568108
Epb41l5	0.0127965	0.789342	0.04	0.022	1
Macrod2	0.0203598	0.787926	0.037	0.02	1
Gtf2ird2	0.35506	0.787598	0.023	0.018	1
Ddx11	0.315949	0.786372	0.01	0.006	1
Maob	0.000110902	0.78604	0.133	0.084	1
Fchsd1	0.0889649	0.785172	0.027	0.017	1
Nup93	1.69088e-06	0.782899	0.173	0.103	0.0337922
Gm20300	5.32472e-06	0.781432	0.148	0.086	0.106414
Tmem80	4.63548e-08	0.781201	0.239	0.15	0.0009264
Snx33	0.00716433	0.779885	0.047	0.025	1
Gm47689	0.0853821	0.777808	0.016	0.008	1
Mrc2	0.00316926	0.776693	0.082	0.052	1
Cpq	5.06659e-35	0.775183	0.735	0.544	1.01256e-30
Plbd2	7.10257e-11	0.774883	0.343	0.233	1.41945e-06
Gfra4	2.07949e-06	0.772746	0.182	0.113	0.0415585
Zfp973	0.0797907	0.771581	0.021	0.011	1
Enpp3	0.723619	0.77128	0.014	0.013	1
Zfp712	0.170339	0.769775	0.022	0.014	1
Emc8	2.68348e-24	0.768883	0.609	0.435	5.36294e-20
E2f1	0.219539	0.765562	0.022	0.015	1
Cdyl	0.000209434	0.764485	0.138	0.09	1
Spsb1	1.39663e-05	0.761917	0.199	0.136	0.279116
Zfp827	0.0727514	0.761586	0.042	0.028	1
Shb	0.000914057	0.761382	0.138	0.095	1
Specc1	3.54782e-12	0.76125	0.39	0.266	7.09031e-08
Apol6	0.0107581	0.760248	0.058	0.036	1
Lyrm9	0.00515185	0.759733	0.066	0.039	1
Tcap	2.73509e-08	0.759491	0.321	0.226	0.000546608
Ipp	0.154018	0.759379	0.029	0.02	1
Emc10	2.51315e-41	0.759269	0.779	0.606	5.02252e-37
Lrch3	4.19885e-05	0.759133	0.163	0.107	0.83914
Tmem206	0.0735123	0.757724	0.024	0.014	1
Dusp3	2.94338e-39	0.754476	0.857	0.703	5.88235e-35
Tk1	0.286087	0.753795	0.01	0.006	1
Crybg3	4.04409e-05	0.753734	0.156	0.1	0.808211
Pgpep1l	0.246418	0.753409	0.017	0.011	1
Arid3b	0.027671	0.753378	0.026	0.013	1
S100a7a	0.601788	0.753206	0.015	0.013	1
Specc1l	1.16526e-06	0.75309	0.241	0.165	0.0232876
Sqle	0.000620579	0.753019	0.099	0.06	1
Dgke	0.045837	0.75248	0.043	0.028	1
Mospd2	0.00268618	0.751527	0.1	0.066	1
Ltbp3	5.51918e-18	0.751213	0.548	0.399	1.10301e-13
Stat5a	0.0100545	0.750507	0.066	0.042	1
Tfeb	0.000420548	0.749774	0.137	0.091	1
Mtg1	0.00422552	0.74942	0.079	0.05	1
Rassf4	0.0455632	0.749376	0.061	0.043	1
Paqr7	0.00519163	0.749325	0.088	0.058	1
Garnl3	0.0347642	0.747247	0.033	0.019	1
AU040320	0.0209608	0.746541	0.037	0.02	1
Slc29a3	0.0719041	0.746166	0.049	0.034	1
Pla2g15	0.00241385	0.744735	0.088	0.056	1
Lpar6	0.128954	0.744594	0.033	0.023	1
Ank2	0.00302105	0.743412	0.104	0.07	1
Cdc37l1	6.60421e-11	0.742764	0.411	0.302	1.31985e-06
Sdad1	0.00140354	0.742649	0.095	0.06	1
Mfap5	3.6618e-23	0.74183	0.428	0.229	7.31811e-19
Ttc30b	0.0423724	0.741693	0.061	0.043	1
Tm7sf2	0.326304	0.739592	0.028	0.022	1
Zfp449	0.00474368	0.739318	0.075	0.047	1
Tjp2	0.00391683	0.739278	0.068	0.041	1
Gm6634	0.002454	0.738426	0.088	0.056	1
Gm48882	0.0044017	0.738216	0.047	0.024	1
Pex11g	0.162011	0.738067	0.019	0.011	1
Hlf	0.000852433	0.738034	0.047	0.02	1
Ggta1	0.00206873	0.737702	0.102	0.067	1
Syn2	0.0729425	0.737249	0.035	0.023	1
Mpv17l	0.00111388	0.737066	0.145	0.103	1
Mbd4	0.114509	0.737002	0.028	0.018	1
P2ry14	0.101669	0.736231	0.022	0.013	1
1010001N08Rik	0.0106323	0.735987	0.055	0.033	1
Tmem268	0.0751914	0.735449	0.016	0.008	1
Adora2b	0.381189	0.735371	0.01	0.006	1
Chmp4c	4.43138e-08	0.734925	0.238	0.149	0.00088561
Tmem209	0.00568311	0.734603	0.063	0.037	1
Siah1b	0.0964859	0.734459	0.024	0.014	1
Tacc2	3.44968e-09	0.734394	0.323	0.219	6.89419e-05
Gsc	0.112058	0.73361	0.01	0.004	1
Tubgcp6	0.187917	0.733514	0.023	0.015	1
Podxl2	1.24961e-06	0.732943	0.22	0.146	0.0249734
Abcc5	0.000115719	0.731981	0.193	0.139	1
A530046M15Rik	0.224931	0.730714	0.013	0.008	1
Lbhd1	0.461121	0.730527	0.013	0.01	1
Dnajc17	0.00184265	0.730188	0.079	0.047	1
8430408G22Rik	0.261661	0.729898	0.022	0.015	1
4921504A21Rik	0.108878	0.729593	0.029	0.019	1
Tceal5	0.0282756	0.729187	0.045	0.028	1
Zdhhc20	7.43624e-10	0.729146	0.315	0.208	1.48613e-05
Scmh1	2.80901e-10	0.728899	0.319	0.208	5.61381e-06
Cped1	6.51884e-80	0.728888	0.978	0.898	1.30279e-75
Sulf2	2.5226e-06	0.728525	0.164	0.097	0.0504141
Unc13b	0.0544781	0.728299	0.029	0.017	1
Gm26873	0.360663	0.728248	0.013	0.009	1
Mcph1	0.179334	0.728171	0.026	0.018	1
Lrig3	0.000990223	0.727723	0.089	0.053	1
Atg9a	0.00257921	0.727272	0.159	0.119	1
Col6a2	2.72072e-15	0.726729	0.433	0.28	5.43736e-11
Zfp507	0.0874251	0.725104	0.039	0.027	1
Cep85	0.133965	0.724722	0.027	0.018	1
Ogt	8.6776e-08	0.723999	0.3	0.211	0.00173422
Enox2	0.0101441	0.722943	0.051	0.029	1
Asap3	0.0255585	0.722349	0.028	0.014	1
Zfp991	0.347824	0.721142	0.01	0.006	1
Fuk	0.0336292	0.720537	0.043	0.027	1
Sorl1	1.26375e-09	0.719367	0.356	0.249	2.52561e-05
Fam20b	0.00819422	0.719064	0.102	0.072	1
Fmn1	0.166658	0.718742	0.025	0.017	1
C1qtnf2	1.11892e-09	0.718363	0.333	0.227	2.23617e-05
Hps1	0.102759	0.71811	0.037	0.025	1
Brwd3	0.0746758	0.717043	0.037	0.024	1
Flrt1	0.0927056	0.716715	0.022	0.013	1
Lrrc39	0.00587337	0.716233	0.06	0.036	1
Cep97	0.0892647	0.71588	0.032	0.02	1
Plxna4	0.0100163	0.715753	0.108	0.079	1
Gm20696	0.0321416	0.71523	0.034	0.019	1
Miip	0.0864567	0.714574	0.036	0.024	1
Tusc1	3.33971e-06	0.714441	0.209	0.137	0.066744
Zbtb39	0.0522414	0.714101	0.019	0.009	1
Tmem18	0.000688572	0.713491	0.146	0.102	1
Fbf1	0.0223216	0.713234	0.038	0.022	1
E130309D02Rik	0.0602737	0.71321	0.06	0.043	1
Zc3h11a	0.0531526	0.712602	0.026	0.014	1
Spred3	0.0778177	0.712592	0.034	0.022	1
Tbc1d22b	0.0179776	0.712506	0.038	0.02	1
Pkd1	1.91259e-12	0.712386	0.476	0.36	3.82231e-08
Fam126a	0.0905278	0.712302	0.052	0.038	1
Hspb7	1.30821e-20	0.710738	0.611	0.468	2.61445e-16
Invs	0.00737689	0.709187	0.09	0.061	1
Alpk1	0.732461	0.707692	0.017	0.015	1
Dusp23	0.266396	0.707288	0.04	0.032	1
Abra	0.002308	0.707234	0.067	0.038	1
Ccne2	0.336462	0.705694	0.013	0.009	1
Trpm3	0.0838526	0.705508	0.017	0.009	1
Rhoq	8.16448e-13	0.705281	0.441	0.313	1.63167e-08
Kidins220	3.89302e-06	0.705179	0.216	0.146	0.077802
Abi3	0.0146438	0.704752	0.046	0.027	1
Tbc1d8b	0.0350558	0.704492	0.057	0.038	1
Casp8	0.00221955	0.704185	0.084	0.052	1
Slc25a38	0.00376392	0.703842	0.133	0.098	1
Lrrc4b	0.426061	0.703634	0.011	0.008	1
Togaram1	0.0184331	0.703623	0.058	0.037	1
Srm	7.85382e-10	0.703554	0.31	0.201	1.56959e-05
Nkx2-5	0.0969233	0.703546	0.024	0.014	1
Hyal1	0.0125109	0.703194	0.055	0.033	1
Ap1s2	3.49384e-11	0.703116	0.381	0.259	6.98244e-07
Pde4a	1.43607e-05	0.703038	0.212	0.145	0.286998
Rrnad1	0.00188029	0.702611	0.116	0.079	1
Ctf1	0.00484312	0.702335	0.077	0.048	1
Gm17092	0.383996	0.70213	0.01	0.006	1
Comtd1	0.000104328	0.701923	0.152	0.099	1
Pdzd4	0.0404656	0.701873	0.055	0.037	1
Trp53bp1	0.0294195	0.701797	0.063	0.043	1
Gk5	0.059616	0.701115	0.05	0.034	1
Fgf13	7.51858e-08	0.700257	0.246	0.155	0.00150259
Ankrd45	0.025795	0.70009	0.028	0.014	1
Ankrd13b	0.0935141	0.699695	0.03	0.019	1
Hps3	0.0178586	0.699661	0.07	0.047	1
C330018D20Rik	0.0194907	0.698232	0.069	0.047	1
Fkbp1b	0.356729	0.697174	0.011	0.008	1
Ldlr	0.000721812	0.696485	0.126	0.083	1
Cercam	1.47925e-10	0.696356	0.415	0.297	2.95629e-06
Lhfpl4	0.362458	0.6962	0.03	0.024	1
Tor3a	0.0184579	0.695968	0.094	0.069	1
Rcn3	1.92983e-44	0.695848	0.864	0.766	3.85677e-40
Mthfd1l	0.307938	0.695785	0.013	0.009	1
Alms1	0.0741164	0.694907	0.042	0.028	1
Igsf3	2.60412e-09	0.694339	0.285	0.182	5.20433e-05
Grhpr	1.28008e-07	0.693847	0.267	0.177	0.00255824
Klhl30	0.0271364	0.693142	0.085	0.062	1
Brd3os	0.119746	0.692757	0.032	0.022	1
Ltbp1	5.50969e-29	0.692445	0.75	0.596	1.10111e-24
Naglu	0.000139175	0.692253	0.13	0.081	1
Acaca	0.0048197	0.691286	0.072	0.044	1
Vps37c	0.0188801	0.691268	0.089	0.064	1
B3gnt5	0.000512217	0.69125	0.125	0.081	1
Trmt44	0.0655464	0.690895	0.045	0.03	1
Tmem238	0.00023361	0.690608	0.124	0.078	1
Pmepa1	7.69291e-72	0.690433	0.988	0.922	1.53743e-67
Cacfd1	0.00015883	0.690316	0.177	0.125	1
March9	0.0345519	0.689838	0.048	0.03	1
Rfx2	0.0782078	0.689754	0.029	0.018	1
Gm42726	0.116824	0.689369	0.02	0.011	1
Vps13d	0.00279016	0.689188	0.108	0.072	1
Plekhh2	6.49245e-05	0.689168	0.114	0.065	1
Cyp51	0.00314302	0.688628	0.104	0.07	1
Sh3bp4	0.00027977	0.688499	0.173	0.122	1
Dsn1	0.287468	0.688188	0.01	0.006	1
Ankzf1	0.0244097	0.687805	0.08	0.057	1
Taco1	0.174916	0.687272	0.012	0.006	1
Lmcd1	2.17709e-39	0.6872	0.817	0.659	4.35091e-35
Cth	0.173354	0.686907	0.017	0.01	1
Slc39a14	0.000488027	0.686498	0.125	0.081	1
Zfp810	0.00297962	0.685817	0.085	0.053	1
Fmo2	4.66803e-57	0.685265	0.947	0.667	9.32906e-53
Pcdhb20	0.183638	0.684619	0.029	0.02	1
Adam11	0.159602	0.684588	0.012	0.006	1
Mtfr1	4.40414e-07	0.68392	0.249	0.166	0.00880166
9130221H12Rik	0.287588	0.683166	0.015	0.01	1
Kif21a	0.234555	0.682813	0.011	0.006	1
4833420G17Rik	8.68306e-05	0.682236	0.188	0.132	1
Ccdc173	0.0493866	0.682142	0.032	0.019	1
Prep	0.0136231	0.680451	0.076	0.051	1
Glb1l	0.112456	0.679107	0.034	0.023	1
Zfp81	0.00828151	0.67905	0.048	0.027	1
Ctnnal1	0.00711252	0.678233	0.14	0.107	1
Phkg1	7.05948e-08	0.67762	0.211	0.125	0.00141084
Kcnh2	1.43943e-08	0.676793	0.382	0.283	0.00028767
Phtf2	3.18858e-06	0.676662	0.275	0.201	0.0637238
Rap2c	0.0598037	0.674842	0.066	0.048	1
Prkdc	0.0922563	0.673863	0.03	0.019	1
Nudt12	0.0234282	0.673796	0.023	0.01	1
Zfp146	0.15201	0.673051	0.041	0.03	1
Fam46b	0.000874493	0.6725	0.135	0.091	1
Ccnt2	3.25095e-06	0.671991	0.235	0.161	0.0649702
Miga1	0.131599	0.671762	0.056	0.043	1
Gm26890	0.135486	0.671	0.027	0.018	1
Arl5c	0.0812663	0.670595	0.024	0.014	1
Sugp2	0.0302282	0.670453	0.06	0.041	1
Rttn	0.501581	0.670342	0.012	0.009	1
Chrna1os	0.0144899	0.669921	0.03	0.014	1
Qpctl	0.0262096	0.669753	0.05	0.032	1
Vps13b	0.00221764	0.669456	0.099	0.064	1
Tor4a	0.0917328	0.668726	0.022	0.013	1
Poll	0.018287	0.668331	0.032	0.017	1
Dcaf6	1.08908e-05	0.66764	0.199	0.132	0.217653
Zbtb18	0.0421513	0.666587	0.047	0.03	1
Gm7160	0.25677	0.666337	0.014	0.009	1
Gm19705	0.000208796	0.665542	0.137	0.089	1
Mfsd6	1.07709e-05	0.665405	0.22	0.151	0.215257
Vsig10	0.0405003	0.664714	0.031	0.018	1
Auts2	8.9758e-20	0.664322	0.618	0.454	1.79381e-15
Fabp3	1.53243e-05	0.664128	0.147	0.088	0.306257
Wdr37	0.00712383	0.663122	0.118	0.086	1
Zgpat	0.00703798	0.662369	0.121	0.089	1
Krt8	0.236467	0.662113	0.011	0.006	1
Haus8	0.00112462	0.661781	0.12	0.08	1
Xrcc6	0.00233777	0.661691	0.107	0.071	1
Clu	6.82135e-45	0.661141	0.941	0.86	1.36325e-40
Adamts2	2.71101e-13	0.661117	0.405	0.254	5.41796e-09
Tpd52	6.96335e-07	0.660338	0.296	0.213	0.0139163
Chd8	0.00162604	0.659887	0.14	0.099	1
Prr7	0.248971	0.659578	0.017	0.011	1
Tecpr2	0.0205282	0.65904	0.032	0.017	1
Ankrd9	1.42333e-06	0.658441	0.205	0.131	0.0284453
Wdr5b	0.167192	0.658251	0.025	0.017	1
Gstt3	0.00213845	0.65806	0.12	0.083	1
Chd2	0.000818949	0.657446	0.167	0.121	1
Zfp423	0.081816	0.656734	0.038	0.025	1
Rtkn	0.493833	0.656304	0.022	0.018	1
Arsb	0.0828576	0.655956	0.058	0.043	1
Dgcr14	0.00860563	0.655739	0.069	0.043	1
Pipox	0.155343	0.655247	0.02	0.013	1
Gfod2	0.220069	0.654903	0.044	0.034	1
Sync	5.07318e-05	0.654797	0.175	0.117	1
Rgs11	0.112395	0.654731	0.017	0.009	1
Asrgl1	0.00816441	0.654294	0.118	0.086	1
Camk2d	1.50249e-28	0.654217	0.775	0.63	3.00272e-24
Leng8	2.19509e-07	0.653635	0.293	0.207	0.00438688
Cntrl	0.00785621	0.653457	0.084	0.056	1
Slx1b	0.0105209	0.652719	0.058	0.036	1
Gm5113	0.220829	0.65261	0.016	0.01	1
Syngr2	2.61581e-10	0.652299	0.429	0.324	5.2277e-06
Scarf2	2.69739e-09	0.652242	0.331	0.224	5.39074e-05
Hspb8	1.93279e-11	0.652046	0.377	0.248	3.86268e-07
Chpf	1.75978e-07	0.651694	0.311	0.219	0.00351693
Zc3h12c	0.0663934	0.65163	0.045	0.03	1
Dhtkd1	0.299829	0.651622	0.012	0.008	1
Zfp239	0.290047	0.651276	0.017	0.011	1
Nt5dc3	0.280487	0.650741	0.034	0.027	1
Zfp772	0.137813	0.649632	0.019	0.011	1
Mvk	0.00105939	0.64922	0.099	0.062	1
Zfp608	0.0076543	0.647929	0.09	0.061	1
Fastkd1	0.0184019	0.646833	0.047	0.028	1
Bhlhe41	7.09204e-05	0.646774	0.156	0.102	1
Ints4	0.0975225	0.646644	0.062	0.047	1
Sp110	0.00246842	0.646249	0.07	0.041	1
Gm26917	0.000229749	0.646215	0.252	0.193	1
Wls	4.36845e-18	0.646078	0.614	0.476	8.73034e-14
Nudt18	1.83727e-06	0.645548	0.269	0.189	0.0367178
Gm11423	0.256812	0.64429	0.02	0.014	1
Nucb1	1.9913e-19	0.643607	0.624	0.48	3.9796e-15
Slc2a10	0.0268432	0.643057	0.068	0.047	1
Plekhm3	0.139916	0.642957	0.057	0.044	1
Fancg	0.39644	0.642899	0.017	0.013	1
Cav3	3.89143e-05	0.642501	0.201	0.139	0.777703
Nmt2	5.47385e-08	0.641671	0.318	0.225	0.00109395
Bend7	0.0486549	0.641147	0.04	0.025	1
Rab11fip5	0.0350543	0.641116	0.077	0.056	1
Htt	0.0143387	0.64101	0.079	0.053	1
Ubr7	0.0181984	0.640464	0.09	0.065	1
Snd1	2.10371e-09	0.640253	0.345	0.238	4.20427e-05
Capn15	0.00187171	0.639514	0.085	0.052	1
Mt1	4.42675e-35	0.638612	0.907	0.727	8.84686e-31
Gm2237	0.214461	0.638386	0.011	0.006	1
2600006K01Rik	0.00453901	0.638353	0.105	0.072	1
Cpt1c	0.153575	0.637974	0.063	0.05	1
Wdr59	0.370015	0.637943	0.017	0.013	1
Zfp870	0.337727	0.637705	0.023	0.018	1
Zfp319	0.163247	0.636832	0.032	0.023	1
Tef	0.0218649	0.634177	0.088	0.064	1
Oxld1	0.00416023	0.634164	0.054	0.029	1
Col1a2	1.84249e-59	0.634045	0.898	0.71	3.68222e-55
Atf6b	1.27216e-05	0.633474	0.288	0.221	0.254242
Sulf1	7.79251e-09	0.633439	0.411	0.305	0.000155733
Fam3c	4.26953e-16	0.632983	0.614	0.485	8.53266e-12
Arhgap24	7.01976e-05	0.632234	0.117	0.067	1
Colec12	1.23513e-34	0.63161	0.83	0.649	2.4684e-30
Tns1	2.40703e-41	0.631518	0.915	0.82	4.81045e-37
Kantr	0.188087	0.630852	0.033	0.024	1
Fah	0.00528178	0.629258	0.088	0.058	1
Nrk	0.12805	0.629246	0.013	0.006	1
Zfp687	0.0492228	0.627983	0.046	0.03	1
Mettl1	1.24554e-05	0.626773	0.218	0.15	0.248921
1600012H06Rik	0.00274611	0.62666	0.137	0.099	1
Megf9	0.0638536	0.624992	0.061	0.044	1
Gmnn	0.0262776	0.624806	0.097	0.072	1
Zfp3	0.487458	0.624658	0.016	0.013	1
Zfp280b	0.342649	0.624629	0.017	0.013	1
Asph	1.94696e-17	0.624188	0.643	0.52	3.89099e-13
Gm16141	0.236698	0.623921	0.05	0.041	1
Nup153	0.0185097	0.623138	0.093	0.067	1
Stac	0.00522561	0.622959	0.053	0.029	1
Abca3	0.00612812	0.622782	0.097	0.066	1
Zfp334	0.115511	0.62159	0.054	0.041	1
Fam213a	0.00147028	0.621516	0.096	0.06	1
Cep57l1	0.0152121	0.620946	0.054	0.033	1
Gm45184	0.234207	0.620748	0.014	0.009	1
Crebzf	3.23195e-06	0.620664	0.24	0.164	0.0645906
Ddx19b	0.224189	0.61986	0.032	0.024	1
Pdzd2	4.27044e-05	0.619825	0.211	0.147	0.853447
Zfp626	0.163444	0.619606	0.032	0.023	1
Zfp142	0.072954	0.619492	0.034	0.022	1
Sel1l3	0.00294546	0.619445	0.047	0.023	1
Kcnq4	7.13973e-05	0.619026	0.164	0.105	1
Sil1	0.0128369	0.618712	0.116	0.086	1
Manea	0.00120039	0.618329	0.12	0.08	1
Mmp23	1.57947e-18	0.618285	0.609	0.459	3.15657e-14
Kri1	0.0577668	0.618241	0.035	0.022	1
Ctsf	8.30158e-08	0.61537	0.311	0.216	0.00165907
Fasn	0.00388361	0.614277	0.065	0.038	1
Prr14l	0.225496	0.613716	0.042	0.033	1
Lars2	0.00150359	0.613422	0.167	0.123	1
Scai	0.0132078	0.613393	0.072	0.047	1
Fndc10	0.506475	0.613382	0.012	0.009	1
Gm26632	0.419079	0.613158	0.021	0.017	1
Itga3	8.88223e-05	0.613085	0.237	0.175	1
Ranbp17	0.115049	0.613028	0.015	0.008	1
Ttc7b	2.61589e-06	0.612972	0.226	0.152	0.0522786
B3glct	0.00142957	0.612416	0.095	0.058	1
Pnisr	3.50037e-13	0.612406	0.534	0.407	6.99549e-09
Nkd2	0.112377	0.612245	0.046	0.033	1
Asap2	5.2539e-10	0.611437	0.441	0.333	1.04999e-05
Xylt2	0.0916894	0.610255	0.095	0.078	1
6430573P05Rik	0.156743	0.609557	0.025	0.017	1
Grk3	0.0875381	0.609239	0.047	0.033	1
S100a1	7.58772e-20	0.608625	0.658	0.524	1.51641e-15
Nhsl2	0.00527254	0.608282	0.107	0.074	1
Lrrtm3	0.427905	0.60782	0.011	0.008	1
Gm20721	0.319553	0.607598	0.018	0.013	1
Lama4	9.07277e-09	0.607592	0.319	0.216	0.000181319
Fam219b	6.39486e-06	0.606534	0.231	0.159	0.127801
AC124739.1	0.505198	0.606253	0.01	0.008	1
App	2.44387e-37	0.606181	0.891	0.818	4.88407e-33
Gpc3	1.9145e-15	0.605888	0.494	0.339	3.82614e-11
Gfm2	0.403674	0.605622	0.032	0.027	1
Tprn	0.244263	0.605335	0.022	0.015	1
Wfdc1	3.08137e-17	0.60508	0.637	0.503	6.15811e-13
Ubtd1	0.0269966	0.604615	0.1	0.075	1
Dph2	0.320311	0.604587	0.019	0.014	1
Pms2	0.132489	0.604571	0.043	0.032	1
Kbtbd7	0.0987075	0.604515	0.045	0.032	1
Synrg	0.00014717	0.604211	0.222	0.165	1
Bmyc	4.41465e-12	0.603558	0.437	0.31	8.82268e-08
Tmem201	0.0654251	0.60346	0.056	0.039	1
Reep5	6.59605e-35	0.60245	0.85	0.743	1.31822e-30
Vezt	0.0371261	0.602318	0.072	0.051	1
Fut10	0.12588	0.601827	0.029	0.019	1
Prkcg	0.176353	0.601743	0.012	0.006	1
Ndc1	0.134716	0.601672	0.038	0.027	1
Khk	0.0168106	0.600848	0.06	0.038	1
Sh3bgr	4.481e-31	0.600709	0.844	0.764	8.95528e-27
Ago4	0.269187	0.600615	0.043	0.034	1
Dnajb5	2.34804e-07	0.598683	0.319	0.229	0.00469256
Ankrd13d	0.128781	0.598461	0.03	0.02	1
Col1a1	5.55666e-45	0.597837	0.881	0.671	1.1105e-40
Gbe1	0.000488559	0.597725	0.128	0.083	1
Tiam2	0.993383	0.597704	0.011	0.011	1
Fam20c	0.000594852	0.597543	0.151	0.104	1
Sec14l1	0.000319827	0.596999	0.15	0.1	1
Zzef1	0.0319078	0.596872	0.085	0.062	1
Alox12	0.466454	0.596387	0.013	0.01	1
Asah2	0.221424	0.596163	0.01	0.005	1
Bcorl1	0.0514578	0.59616	0.074	0.055	1
Usp13	0.10028	0.596092	0.051	0.037	1
Katnb1	0.258635	0.595774	0.051	0.042	1
Sobp	0.009836	0.595448	0.092	0.064	1
Bmf	0.0507371	0.594928	0.032	0.019	1
Lpin2	0.243553	0.594799	0.028	0.02	1
Fem1c	0.00208216	0.593818	0.104	0.067	1
Gm26870	0.881493	0.593758	0.023	0.024	1
P2rx1	0.00199361	0.59368	0.081	0.048	1
Dok1	0.0514633	0.593427	0.11	0.088	1
Naaladl2	0.0423015	0.593178	0.025	0.013	1
Ak3	2.7979e-11	0.593111	0.47	0.347	5.59161e-07
Slit3	1.23444e-08	0.592534	0.4	0.302	0.000246703
Bnip3	7.18432e-08	0.591682	0.31	0.216	0.00143579
Usp12	0.00736267	0.591164	0.101	0.07	1
Dmxl1	0.000740002	0.590937	0.176	0.127	1
Cep131	0.401938	0.590749	0.035	0.029	1
Edc3	0.20812	0.590709	0.04	0.03	1
Etv5	0.0403828	0.590409	0.055	0.037	1
Plcd1	0.000695179	0.590341	0.183	0.133	1
Espn	0.32876	0.589306	0.012	0.008	1
Herc3	0.0852252	0.588998	0.084	0.066	1
Dtd1	0.000203412	0.58877	0.172	0.121	1
Nrbp2	5.961e-06	0.587819	0.255	0.179	0.119131
Ctsb	1.44706e-44	0.587772	0.914	0.798	2.89195e-40
Deaf1	0.000162146	0.587392	0.119	0.071	1
Zfp703	0.000426271	0.586895	0.22	0.165	1
Cnn3	6.75181e-28	0.586857	0.766	0.61	1.34935e-23
Dhx35	0.110606	0.586623	0.029	0.019	1
Dcp1b	0.0538002	0.586578	0.064	0.046	1
Nbeal1	1.19917e-16	0.585722	0.684	0.559	2.39653e-12
Ccdc17	0.178951	0.585536	0.01	0.005	1
Syn1	0.390813	0.584585	0.011	0.008	1
Dbn1	0.000255047	0.584494	0.127	0.08	1
Npc1	0.00782361	0.584484	0.119	0.086	1
Styx	0.0920933	0.584325	0.028	0.018	1
Zfp446	0.278681	0.584015	0.023	0.017	1
Prepl	0.0779153	0.583872	0.029	0.018	1
1700037C18Rik	0.0732187	0.58378	0.029	0.018	1
Plekha5	4.74825e-06	0.583242	0.265	0.189	0.0948938
Clock	9.62103e-07	0.58309	0.302	0.219	0.0192276
Snhg10	0.106504	0.582232	0.023	0.014	1
Aff2	0.00579033	0.582029	0.081	0.052	1
Prdm5	0.204742	0.581352	0.095	0.083	1
Pgam5	0.00818189	0.580877	0.1	0.07	1
Hspb6	3.13419e-30	0.580696	0.844	0.728	6.26368e-26
Tmem181a	0.0229207	0.57984	0.095	0.07	1
9330182L06Rik	0.639597	0.579312	0.011	0.009	1
Minpp1	6.38726e-05	0.578138	0.237	0.174	1
Nek4	0.317474	0.578042	0.039	0.032	1
Fads1	0.00693277	0.577976	0.128	0.094	1
Psap	1.10795e-48	0.57655	0.96	0.905	2.21423e-44
Golga3	4.18612e-06	0.576382	0.232	0.156	0.0836596
Wwp1	3.08973e-06	0.576316	0.278	0.199	0.0617483
Lcor	0.105944	0.576202	0.067	0.052	1
Entpd7	0.0590638	0.576001	0.083	0.064	1
Rbl2	0.00016557	0.576	0.177	0.122	1
Sytl5	0.0503981	0.575932	0.021	0.01	1
D130017N08Rik	0.170828	0.575222	0.014	0.008	1
Strada	0.0498406	0.574805	0.095	0.074	1
Zfp428	0.513183	0.574479	0.019	0.015	1
Gm47767	0.215462	0.574306	0.031	0.023	1
Ppp1r3f	0.275936	0.57414	0.04	0.032	1
Maoa	0.000235281	0.573967	0.147	0.098	1
Agl	0.000105023	0.573242	0.179	0.121	1
Zmym6	0.0961388	0.572849	0.03	0.019	1
Hcfc1	0.0138821	0.572767	0.156	0.126	1
Gspt2	0.0969072	0.572197	0.038	0.025	1
Apba1	0.232629	0.571942	0.045	0.036	1
Eva1b	3.87297e-12	0.571938	0.528	0.409	7.74012e-08
Dync2h1	0.0247727	0.571883	0.067	0.046	1
Cd320	0.00321975	0.571786	0.12	0.084	1
Hipk2	0.00521487	0.571055	0.14	0.104	1
Pomgnt2	0.00354601	0.570841	0.094	0.061	1
Smpd1	1.13539e-07	0.570752	0.36	0.262	0.00226907
Atg2a	0.904662	0.570422	0.071	0.071	1
Abcg1	0.317349	0.56998	0.01	0.006	1
Fra10ac1	0.000503519	0.569917	0.175	0.125	1
AU020206	0.066585	0.569882	0.026	0.015	1
Stx16	0.000303542	0.56935	0.181	0.128	1
Nr1d2	0.0689296	0.568953	0.064	0.047	1
Fam19a5	0.0402839	0.568406	0.049	0.032	1
Adnp	0.0974002	0.568271	0.027	0.017	1
Rab4a	0.00106351	0.567983	0.136	0.093	1
Hdhd5	0.298013	0.567495	0.037	0.029	1
Top3a	0.274098	0.567362	0.018	0.013	1
Plod3	0.000446639	0.567218	0.297	0.243	1
Grpel2	0.0366905	0.567143	0.066	0.046	1
Gmppb	0.000279701	0.566502	0.151	0.1	1
Adamts6	0.00944845	0.566225	0.081	0.053	1
Sema6c	0.0139957	0.565845	0.038	0.02	1
Fmo4	0.187991	0.565743	0.017	0.01	1
Pde4dip	1.96067e-07	0.564207	0.368	0.276	0.00391841
Fbln5	8.49069e-29	0.56396	0.927	0.82	1.69686e-24
Abhd12	0.00156998	0.563745	0.177	0.132	1
Sh3pxd2a	6.2905e-05	0.563406	0.254	0.191	1
Vars	0.00128813	0.563333	0.154	0.109	1
Cdc25b	0.0294887	0.563026	0.056	0.037	1
Man1a2	3.11125e-09	0.562562	0.458	0.351	6.21783e-05
Dynlt1a	0.0622397	0.562335	0.084	0.065	1
Rpl9-ps6	0.220555	0.562286	0.047	0.037	1
Tmem260	0.0798508	0.56217	0.052	0.037	1
Taok1	4.37328e-09	0.561558	0.499	0.395	8.74e-05
Pfkfb3	0.0333776	0.561393	0.064	0.044	1
Adgre5	2.06887e-05	0.560753	0.19	0.126	0.413464
Ttc14	1.09878e-06	0.560612	0.383	0.299	0.0219591
Ccdc146	0.022107	0.560477	0.028	0.014	1
Sgsh	0.0474595	0.560188	0.045	0.029	1
Rgl1	0.0899967	0.559867	0.052	0.038	1
Map2k3os	0.0889904	0.559835	0.057	0.042	1
Acvrl1	0.0367205	0.559596	0.094	0.071	1
B230307C23Rik	0.346446	0.559327	0.052	0.044	1
Tamm41	0.328332	0.55918	0.031	0.024	1
Angptl6	0.0798299	0.557891	0.041	0.028	1
Sgcb	1.09869e-08	0.557762	0.476	0.38	0.000219573
Jph2	1.37602e-12	0.557668	0.593	0.482	2.74997e-08
Pex1	0.0593883	0.556552	0.028	0.017	1
Etl4	0.00161889	0.556486	0.099	0.062	1
Dync1h1	0.000210423	0.556466	0.3	0.24	1
Rgl2	0.0281004	0.556454	0.108	0.083	1
Gas6	3.41557e-35	0.555818	0.835	0.634	6.82603e-31
Slc23a2	0.0083698	0.555301	0.059	0.036	1
Tom1	0.0353698	0.554746	0.061	0.042	1
Diaph1	8.20634e-05	0.554731	0.206	0.147	1
Thap7	0.00330102	0.554686	0.155	0.116	1
Ranbp6	0.0935634	0.554508	0.042	0.029	1
Tmem184b	6.47224e-05	0.554192	0.22	0.159	1
Klf15	5.63277e-06	0.553752	0.307	0.229	0.112571
Zcchc24	3.33392e-07	0.553556	0.277	0.187	0.00666283
Tcea3	0.000112781	0.553543	0.273	0.212	1
Kdm5b	0.000306624	0.553382	0.149	0.099	1
Sec23a	6.04618e-09	0.553225	0.45	0.347	0.000120833
Tmem47	6.54281e-20	0.5516	0.709	0.56	1.30758e-15
Galt	0.00161623	0.551022	0.149	0.105	1
9130011E15Rik	0.318284	0.55066	0.01	0.006	1
Ppm1f	0.0889598	0.550108	0.03	0.019	1
Morn2	0.00308409	0.549877	0.094	0.061	1
Cep192	0.0395869	0.549449	0.049	0.032	1
Olfr1033	1.43085e-10	0.549106	0.535	0.423	2.85956e-06
Pdgfd	1.12812e-19	0.548159	0.667	0.499	2.25455e-15
Pcyt2	0.00518476	0.547975	0.111	0.078	1
Loxl1	2.06073e-11	0.547757	0.524	0.407	4.11837e-07
Cnksr3	3.48132e-05	0.546986	0.186	0.123	0.695742
Cant1	0.000804717	0.546341	0.164	0.117	1
Srxn1	0.0689255	0.544842	0.082	0.064	1
Gigyf2	0.000636389	0.54441	0.161	0.113	1
Dcun1d2	0.0322993	0.543923	0.082	0.06	1
Gm42067	0.439007	0.543904	0.022	0.018	1
Stard4	0.429471	0.543734	0.025	0.02	1
mt-Nd5	8.65441e-28	0.543406	0.876	0.813	1.72958e-23
Pbxip1	1.69731e-43	0.543384	0.957	0.906	3.39207e-39
Ccdc61	0.399181	0.543051	0.032	0.027	1
Rbp1	8.20749e-44	0.542692	0.958	0.788	1.64027e-39
Tcirg1	0.0585244	0.54268	0.072	0.053	1
Adgrl2	6.86317e-10	0.542571	0.464	0.347	1.3716e-05
Thrb	4.57854e-06	0.542352	0.292	0.216	0.0915021
Ankrd16	0.0337514	0.542198	0.063	0.043	1
Zxdc	0.012589	0.54217	0.101	0.072	1
1700086O06Rik	0.270913	0.541563	0.017	0.011	1
Ercc8	0.0930497	0.541121	0.049	0.036	1
Trio	6.48922e-06	0.540806	0.272	0.198	0.129687
Asxl2	0.0270632	0.540003	0.111	0.085	1
Ldhb	4.66842e-14	0.539832	0.612	0.482	9.32983e-10
Cnot1	0.000973551	0.539782	0.184	0.136	1
Fam98a	0.00121913	0.539006	0.145	0.1	1
Fbxl12	0.0175735	0.53867	0.07	0.047	1
Bgn	7.72616e-75	0.538529	0.998	0.986	1.54407e-70
Pon3	1.1323e-05	0.538308	0.199	0.13	0.226289
Ppip5k1	0.00922919	0.538083	0.107	0.076	1
Zfp583	0.477599	0.53745	0.019	0.015	1
Prkci	0.0493175	0.537356	0.12	0.097	1
Osbpl7	0.538006	0.537073	0.02	0.017	1
Kat14	0.0229531	0.536961	0.078	0.055	1
Gsto1	0.0171431	0.536805	0.078	0.053	1
Mtcp1	0.362763	0.536691	0.026	0.02	1
Mgat5	0.0239728	0.536682	0.06	0.039	1
Prmt6	0.273247	0.536226	0.033	0.025	1
Lurap1	0.227963	0.536187	0.035	0.027	1
L2hgdh	0.0332642	0.535989	0.063	0.043	1
Reep4	0.0624274	0.535515	0.059	0.042	1
Meis3	0.0556506	0.535309	0.078	0.058	1
Rev3l	0.0332881	0.534416	0.112	0.088	1
Lrrc14	0.0832953	0.533972	0.069	0.052	1
Ascc3	0.00251926	0.533722	0.17	0.13	1
Eif2ak1	0.0417241	0.533184	0.065	0.046	1
Mcm3	0.1453	0.532984	0.034	0.024	1
Mmab	0.187781	0.532479	0.039	0.029	1
Mansc1	0.0188233	0.532316	0.076	0.052	1
Hspa4	1.45034e-10	0.532175	0.524	0.418	2.8985e-06
Cic	0.00911717	0.531973	0.134	0.1	1
Pygl	0.0751247	0.531956	0.062	0.046	1
Etv1	9.36817e-05	0.531898	0.216	0.152	1
AU022252	0.00610792	0.531176	0.063	0.037	1
5730480H06Rik	0.000582029	0.53066	0.153	0.105	1
Echdc1	0.00427466	0.53058	0.147	0.108	1
Zc4h2	0.252508	0.530528	0.051	0.042	1
Rpn2	4.10647e-18	0.530516	0.708	0.576	8.20678e-14
Fkbp9	1.14041e-16	0.530496	0.653	0.52	2.2791e-12
Rabif	0.00374813	0.530455	0.156	0.117	1
Ikzf2	0.0385896	0.530428	0.08	0.058	1
Trib2	0.0402064	0.530324	0.061	0.042	1
Nfe2l1	5.13868e-13	0.530245	0.637	0.531	1.02696e-08
Nfic	8.36546e-17	0.529733	0.678	0.548	1.67184e-12
Gstm4	0.199961	0.529706	0.044	0.034	1
Zdhhc12	0.0268964	0.529535	0.063	0.042	1
Gk	5.49802e-06	0.529497	0.291	0.215	0.109878
Per3	0.357564	0.529448	0.045	0.038	1
Slc25a10	0.256738	0.529152	0.043	0.034	1
Bag4	0.209465	0.528208	0.059	0.048	1
Aplp1	0.0354067	0.5282	0.077	0.056	1
Mars2	0.127667	0.527224	0.035	0.024	1
Ppp1r13l	0.0752744	0.526867	0.031	0.019	1
Thoc6	0.0474849	0.526015	0.08	0.06	1
Tet1	0.0195309	0.525634	0.061	0.039	1
Inhba	1.6258e-09	0.525525	0.524	0.414	3.24916e-05
Usp48	0.00479877	0.525316	0.159	0.121	1
1110034G24Rik	0.0174499	0.524997	0.094	0.067	1
Cttnbp2nl	0.00540881	0.524988	0.156	0.119	1
Col5a1	1.30845e-06	0.524799	0.387	0.301	0.0261494
Adck1	0.0744712	0.524468	0.069	0.052	1
Vps25	0.00907185	0.524147	0.064	0.039	1
Ergic1	9.60265e-06	0.523891	0.273	0.201	0.191909
P4ha2	9.53916e-05	0.523629	0.258	0.193	1
Tet3	0.00126299	0.523497	0.171	0.126	1
Slc35a3	0.0898679	0.523485	0.045	0.032	1
Usf3	0.0424881	0.522736	0.102	0.079	1
Hexa	7.8599e-09	0.522401	0.383	0.274	0.00015708
Mthfsd	0.015931	0.522128	0.101	0.074	1
Pcyox1l	2.89395e-05	0.521862	0.272	0.203	0.578355
Lmbrd2	0.0031538	0.5217	0.115	0.079	1
Nubpl	0.153734	0.521698	0.046	0.034	1
Zfand2a	0.0447283	0.521625	0.057	0.039	1
Zxdb	0.0784429	0.521464	0.086	0.067	1
Sparc	2.02508e-63	0.520614	0.99	0.983	4.04713e-59
Adarb1	1.75842e-05	0.520249	0.355	0.282	0.351421
Taf1c	0.616873	0.520201	0.022	0.019	1
Zbtb38	1.21021e-18	0.520014	0.769	0.638	2.41861e-14
Tmem43	5.56307e-07	0.519875	0.417	0.333	0.0111178
Gm3604	0.115648	0.519774	0.015	0.008	1
Zbtb26	0.63044	0.519535	0.02	0.018	1
Wdr4	0.268868	0.519364	0.048	0.039	1
CAAA01147332.1	0.426622	0.517791	0.026	0.022	1
Snx8	0.295427	0.517767	0.03	0.023	1
Actn1	3.42693e-62	0.517413	0.988	0.958	6.84871e-58
Lrrfip1	5.75288e-32	0.517287	0.9	0.795	1.14971e-27
Efr3a	7.39748e-12	0.51701	0.546	0.426	1.47839e-07
Gtf2e1	0.0148817	0.51618	0.036	0.019	1
Rpap1	0.249272	0.515342	0.053	0.043	1
D930016D06Rik	0.157916	0.51459	0.038	0.028	1
Alg9	0.175702	0.514379	0.044	0.033	1
Hist1h4i	0.861249	0.514355	0.042	0.041	1
Ccdc117	0.0228203	0.514175	0.091	0.066	1
P3h4	6.20536e-09	0.513244	0.456	0.353	0.000124014
Gm42418	1.06712e-05	0.512058	0.678	0.645	0.213263
Dnmt3b	0.15771	0.511856	0.02	0.013	1
Tcf20	0.0127197	0.511447	0.092	0.064	1
Mycbp2	9.93334e-06	0.511418	0.359	0.282	0.198518
Qsox2	0.0449674	0.511304	0.096	0.074	1
Slc12a9	0.0932776	0.51112	0.061	0.046	1
Crispld1	0.00665635	0.510518	0.126	0.091	1
Ppm1m	1.74916e-05	0.509932	0.332	0.255	0.34957
Large1	6.04979e-05	0.509822	0.32	0.252	1
Zdhhc13	0.275727	0.509765	0.038	0.03	1
Nat10	0.245806	0.50906	0.054	0.044	1
Rnf26	0.159687	0.509001	0.061	0.048	1
Adamtsl3	0.0936355	0.508843	0.085	0.067	1
Tgfbr1	3.8036e-08	0.508722	0.382	0.278	0.00076015
Foxc2	0.000917217	0.508642	0.303	0.253	1
Hyou1	0.00593784	0.508452	0.213	0.174	1
Arl4a	5.17023e-08	0.50822	0.497	0.403	0.00103327
Chst12	9.37857e-06	0.508214	0.315	0.24	0.187431
2900076A07Rik	0.00170586	0.507722	0.123	0.084	1
Adat1	0.450584	0.507689	0.026	0.022	1
Kdsr	0.000109879	0.50758	0.332	0.272	1
Sntg2	0.0408679	0.507412	0.124	0.099	1
Tsc22d4	1.88662e-11	0.507258	0.576	0.447	3.77041e-07
Hid1	0.487461	0.50717	0.042	0.037	1
Pank4	0.255938	0.506843	0.065	0.055	1
Inpp5j	0.221727	0.506707	0.01	0.005	1
Smg1	0.0010302	0.506677	0.185	0.137	1
Spout1	0.053403	0.506581	0.083	0.064	1
Lrg1	0.31791	0.506563	0.01	0.006	1
Hist3h2a	0.0214212	0.506289	0.068	0.046	1
Gm26853	0.170663	0.506253	0.066	0.053	1
Surf6	0.00396375	0.506015	0.074	0.044	1
Ano10	4.76986e-05	0.505561	0.263	0.196	0.953257
Slc25a40	0.0372777	0.505556	0.142	0.117	1
Eaf2	0.0939878	0.505522	0.014	0.006	1
Ppp2r5b	0.00685276	0.50506	0.134	0.099	1
Cspp1	0.0154304	0.504913	0.228	0.193	1
Golt1b	7.68248e-10	0.504891	0.454	0.338	1.53534e-05
Yipf2	0.272293	0.504741	0.059	0.05	1
Srpk3	0.00671388	0.504556	0.154	0.117	1
Cdk20	0.0595868	0.504553	0.032	0.019	1
Tspan4	7.26355e-05	0.50442	0.242	0.179	1
Cacnb1	0.0268402	0.503644	0.047	0.029	1
Sfxn5	0.158646	0.503608	0.063	0.05	1
9530068E07Rik	1.62222e-16	0.50315	0.707	0.601	3.24201e-12
Rab3a	9.79297e-08	0.502796	0.466	0.372	0.00195712
Sgms2	0.00283087	0.502507	0.149	0.108	1
Ccdc137	0.119896	0.501555	0.072	0.057	1
Tnfrsf11a	0.000163835	0.501423	0.207	0.147	1
Gm16751	0.791768	0.50132	0.01	0.009	1
Por	3.1803e-05	0.501222	0.278	0.207	0.635582
Dus2	0.0499517	0.500498	0.076	0.056	1
Ccdc39	0.299597	0.500148	0.021	0.015	1
Ccdc171	0.179268	0.499524	0.01	0.005	1
Cd164	5.87385e-05	0.499476	0.304	0.236	1
Col6a1	6.66985e-15	0.499227	0.52	0.343	1.33297e-10
Hjurp	0.144477	0.499166	0.046	0.034	1
Borcs5	0.0339913	0.498643	0.103	0.079	1
Rhbdd3	0.0859602	0.49835	0.049	0.034	1
Fbxw7	0.0466981	0.498061	0.093	0.071	1
Nomo1	0.0587062	0.498049	0.15	0.126	1
Dgkq	0.179353	0.498048	0.036	0.027	1
Fkbp10	8.52183e-05	0.497966	0.279	0.215	1
Zfp994	0.0462785	0.497931	0.045	0.029	1
Zbtb20	6.40798e-30	0.497909	0.921	0.853	1.28064e-25
Grtp1	0.236536	0.497559	0.06	0.05	1
Tmem101	0.0484653	0.496956	0.085	0.064	1
Sorbs3	0.0285705	0.49692	0.096	0.071	1
Rras2	0.000731442	0.495841	0.141	0.095	1
Prss36	0.257641	0.495827	0.036	0.028	1
Ano6	7.71952e-05	0.495819	0.258	0.192	1
Il10rb	2.74218e-05	0.495704	0.222	0.156	0.548025
Sacs	0.0315448	0.495095	0.15	0.122	1
Npy1r	9.3593e-16	0.49478	0.683	0.563	1.87046e-11
Spryd3	0.000610961	0.494388	0.238	0.184	1
Cpped1	0.00187778	0.493193	0.151	0.108	1
Creld2	1.5628e-05	0.492481	0.274	0.197	0.312326
Ramp1	1.33227e-23	0.492403	0.839	0.775	2.66254e-19
Fam173a	1.65988e-05	0.492399	0.29	0.215	0.331728
Tmed3	1.01248e-11	0.492197	0.584	0.465	2.02344e-07
Acadsb	3.98136e-08	0.492061	0.498	0.414	0.000795674
Mapk12	0.283106	0.491925	0.023	0.017	1
Dus4l	0.261181	0.491889	0.04	0.032	1
Apol7d	0.394782	0.491799	0.013	0.009	1
Frmd6	0.00627943	0.491434	0.208	0.169	1
Fbxo27	0.0658523	0.491382	0.031	0.019	1
Dock7	0.00245465	0.49078	0.21	0.163	1
Wdfy3	0.0489136	0.490632	0.11	0.088	1
Sncaip	0.0699303	0.490534	0.08	0.061	1
Carf	0.122365	0.490185	0.076	0.061	1
Afg3l1	0.00321149	0.489701	0.173	0.131	1
Slc25a36	2.37289e-05	0.489667	0.264	0.191	0.474221
Inafm2	8.51034e-09	0.489401	0.562	0.465	0.000170079
Lipt1	0.121582	0.488927	0.024	0.015	1
Paxx	5.23002e-05	0.488579	0.238	0.172	1
Usp54	0.521401	0.488469	0.049	0.044	1
Usp45	0.0194367	0.488116	0.086	0.061	1
Gdf15	0.252567	0.488083	0.11	0.126	1
Clstn1	1.52578e-07	0.487969	0.42	0.324	0.00304927
Zbtb33	0.202223	0.487477	0.037	0.028	1
Itgb5	1.62348e-21	0.487356	0.796	0.681	3.24452e-17
mt-Co3	2.0476e-62	0.486724	0.999	1	4.09213e-58
Cxcl12	1.65964e-26	0.486652	0.435	0.213	3.31679e-22
Fkbp14	0.000557883	0.486578	0.194	0.144	1
Pafah2	0.408346	0.486564	0.027	0.022	1
AI480526	0.0690782	0.486304	0.043	0.029	1
Brca2	0.732688	0.486205	0.025	0.023	1
Ap3m1	0.000270771	0.48611	0.249	0.189	1
Susd5	3.05887e-17	0.485814	0.734	0.61	6.11315e-13
Ttc32	0.048894	0.485458	0.101	0.079	1
Dap	2.08384e-12	0.484466	0.625	0.512	4.16456e-08
H2-DMa	0.507639	0.484407	0.01	0.008	1
Slc22a21	0.386326	0.483873	0.033	0.027	1
Fam89b	0.074628	0.483539	0.035	0.023	1
Gcat	0.00495789	0.483488	0.121	0.086	1
Gipc3	0.320159	0.483272	0.016	0.011	1
Trub1	0.0508943	0.482923	0.042	0.027	1
Gsr	1.33595e-09	0.482878	0.584	0.479	2.66991e-05
Stradb	0.0273737	0.482746	0.079	0.056	1
Zfp14	0.029629	0.482433	0.045	0.028	1
Nudt7	0.122957	0.482352	0.032	0.022	1
Neurl2	0.0220889	0.481788	0.1	0.074	1
Rora	4.32855e-06	0.48168	0.369	0.286	0.086506
Msn	5.72526e-30	0.481513	0.907	0.818	1.14419e-25
Vav3	0.22075	0.481472	0.045	0.036	1
Wdr53	0.0405049	0.481414	0.074	0.053	1
Slc29a1	3.26179e-11	0.481102	0.622	0.506	6.5187e-07
Gng7	0.308337	0.480526	0.013	0.009	1
Taf1	0.0160575	0.480498	0.138	0.107	1
Mtus2	7.7078e-15	0.480294	0.714	0.607	1.5404e-10
Sphk2	0.0341523	0.480058	0.129	0.102	1
Selenop	1.33909e-41	0.479275	0.845	0.633	2.67617e-37
Dnaaf2	0.295931	0.478936	0.017	0.011	1
Gm47802	0.371993	0.478762	0.016	0.011	1
Mtmr1	0.0217466	0.478661	0.071	0.048	1
Mt2	8.14517e-15	0.47857	0.506	0.346	1.62781e-10
Rpusd3	0.442692	0.478451	0.022	0.018	1
mt-Atp8	0.0064296	0.478327	0.302	0.266	1
5033417F24Rik	0.288853	0.47801	0.01	0.006	1
Dok4	0.0986233	0.47703	0.054	0.039	1
Colgalt1	3.2994e-05	0.476727	0.328	0.254	0.659386
Abhd3	0.068183	0.476501	0.026	0.015	1
Cnpy3	0.000114901	0.476362	0.261	0.198	1
Heatr5a	0.0101695	0.476324	0.126	0.093	1
Mcm3ap	0.034674	0.476106	0.057	0.038	1
Dph6	0.0810457	0.475756	0.094	0.075	1
Nuak1	0.0972078	0.475477	0.11	0.091	1
Pparg	0.43011	0.474936	0.015	0.011	1
Agtr1b	0.719551	0.474391	0.018	0.017	1
Tpx2	0.551609	0.474297	0.018	0.015	1
Pigc	0.0639074	0.474052	0.091	0.071	1
Prelp	6.26777e-21	0.473505	0.711	0.52	1.25261e-16
Msrb1	1.56606e-15	0.473336	0.76	0.705	3.12978e-11
Ubn2	0.00310204	0.473296	0.288	0.243	1
Fnbp1	9.67366e-07	0.473258	0.298	0.206	0.0193328
0610030E20Rik	0.0725989	0.47283	0.101	0.081	1
Edn1	0.00915216	0.472302	0.072	0.046	1
Ganab	0.00228823	0.471757	0.148	0.105	1
Ears2	0.0631125	0.471647	0.039	0.025	1
Rlf	0.00223345	0.47136	0.19	0.145	1
Hmgcs1	1.10716e-05	0.470977	0.329	0.253	0.221265
Pik3r4	0.111297	0.470949	0.049	0.036	1
Jagn1	0.00192945	0.470721	0.234	0.186	1
Slc39a3	0.0416288	0.470511	0.108	0.084	1
Lztfl1	8.57287e-05	0.470414	0.241	0.174	1
Pkn1	0.00372472	0.47035	0.193	0.15	1
Trappc6a	0.000120504	0.470264	0.3	0.234	1
Gfpt1	0.00833129	0.470059	0.146	0.112	1
Plaur	0.0491075	0.469996	0.059	0.041	1
Tbc1d5	0.237401	0.469767	0.059	0.048	1
Wdr24	0.520864	0.469683	0.023	0.019	1
Slc16a7	7.57565e-05	0.468958	0.303	0.235	1
Rnf144b	0.363059	0.468802	0.037	0.03	1
Zfp623	0.395832	0.468665	0.021	0.017	1
Edem1	0.000332266	0.467963	0.205	0.149	1
Popdc2	0.000269308	0.467697	0.258	0.198	1
Zfp354c	0.0471327	0.466719	0.079	0.058	1
Rgs5	1.70562e-07	0.466687	0.219	0.135	0.00340868
Slc11a2	0.0504408	0.466603	0.076	0.056	1
Ncald	0.00189144	0.466407	0.209	0.163	1
Lss	0.0500811	0.466242	0.037	0.023	1
Gm10031	0.628062	0.465981	0.012	0.01	1
Ptpn23	0.435249	0.465963	0.049	0.043	1
Aff4	1.07174e-07	0.46544	0.47	0.37	0.00214186
Hdac7	0.00336332	0.465218	0.16	0.118	1
Src	0.00126244	0.464931	0.138	0.094	1
Dlgap1	1.52168e-05	0.464859	0.219	0.149	0.304108
Gm26909	0.187153	0.464505	0.039	0.029	1
Ecm1	1.2638e-13	0.464432	0.85	0.818	2.5257e-09
Hexb	4.79196e-12	0.464007	0.525	0.385	9.57672e-08
Acsl1	9.17363e-07	0.463582	0.409	0.324	0.0183335
Lin52	0.0459287	0.463256	0.062	0.043	1
Ankra2	0.000962545	0.463161	0.238	0.186	1
Pias3	0.0071217	0.463098	0.179	0.141	1
Gpr27	0.050867	0.463086	0.031	0.018	1
Spag9	2.77982e-08	0.463075	0.526	0.431	0.000555547
Samd10	0.090662	0.462764	0.027	0.017	1
Dtx3l	0.227814	0.46245	0.056	0.046	1
Map3k1	0.0151017	0.462271	0.126	0.095	1
Zfp654	0.0357072	0.462098	0.065	0.044	1
Atp6v0b	2.41164e-19	0.462017	0.823	0.741	4.81965e-15
Tmem231	0.138898	0.461934	0.065	0.051	1
Zbtb1	0.00346397	0.46079	0.218	0.173	1
Serpine2	1.00772e-22	0.460549	0.944	0.907	2.01393e-18
Lncpint	0.0768827	0.460452	0.076	0.058	1
Atp2a3	0.0119501	0.459469	0.087	0.06	1
Dock11	0.0380915	0.458572	0.056	0.038	1
Acad8	0.158254	0.45824	0.14	0.125	1
Tldc1	0.24402	0.458226	0.026	0.019	1
9130008F23Rik	0.0729672	0.458013	0.042	0.028	1
Zbtb16	4.4755e-07	0.457874	0.326	0.235	0.00894429
Wdr6	0.0199742	0.457752	0.122	0.093	1
Cidea	0.00169529	0.457709	0.195	0.146	1
Epm2aip1	0.235645	0.45731	0.071	0.06	1
mt-Nd3	1.4326e-21	0.457085	0.936	0.881	2.86304e-17
Exosc5	0.000383474	0.456294	0.238	0.18	1
Rnf181	3.73289e-05	0.456281	0.313	0.239	0.746018
2310022A10Rik	0.0106436	0.456246	0.104	0.074	1
Rab34	8.68521e-06	0.456027	0.389	0.31	0.173574
Brwd1	0.00422276	0.455639	0.202	0.159	1
Rnf111	0.0438361	0.455578	0.122	0.098	1
Fut8	0.0371239	0.455428	0.121	0.095	1
Trappc12	0.0333539	0.455139	0.102	0.078	1
Plin4	1.68514e-06	0.454711	0.414	0.328	0.0336775
Ttc38	0.0215438	0.454612	0.042	0.024	1
Foxp2	3.03473e-06	0.454285	0.37	0.285	0.060649
Car11	0.0146745	0.453633	0.145	0.112	1
Fzd2	4.31837e-06	0.453621	0.431	0.344	0.0863026
Kyat3	0.266707	0.453503	0.059	0.05	1
Sec31a	1.07974e-07	0.453155	0.458	0.366	0.00215786
Xpo6	0.0981227	0.453112	0.117	0.098	1
Smg9	0.058981	0.452589	0.053	0.037	1
Inca1	0.215824	0.451832	0.011	0.006	1
Fuca1	1.71091e-05	0.451796	0.314	0.239	0.341926
Sgo2a	0.461203	0.45171	0.018	0.014	1
Ppt2	0.000329122	0.451456	0.257	0.198	1
Ythdc2	0.00872574	0.451386	0.064	0.039	1
Cep350	0.0148553	0.451338	0.149	0.116	1
Serf2	1.22901e-43	0.451307	0.984	0.983	2.45618e-39
Insig2	3.14814e-08	0.451262	0.483	0.385	0.000629155
Mtmr6	0.000683919	0.451058	0.339	0.282	1
Zbtb14	0.0923651	0.451036	0.095	0.076	1
Ces2g	0.0140092	0.450895	0.098	0.07	1
2700033N17Rik	0.598376	0.450889	0.021	0.018	1
Cdc25a	0.109117	0.450619	0.059	0.044	1
Anxa11	4.50283e-18	0.450292	0.831	0.769	8.99891e-14
4831440E17Rik	0.554243	0.450228	0.022	0.019	1
Tm9sf4	0.025354	0.449999	0.136	0.108	1
Osbp	0.0360056	0.449612	0.121	0.095	1
Fnbp4	0.00911921	0.449467	0.133	0.099	1
Rnaseh2b	0.048146	0.449366	0.085	0.064	1
Tmtc1	0.00289269	0.449358	0.171	0.127	1
Magi3	0.10425	0.449271	0.048	0.034	1
Sestd1	0.00349947	0.449185	0.19	0.147	1
Degs1	5.09509e-13	0.449152	0.748	0.658	1.01825e-08
Gtf2ird1	0.0679366	0.44907	0.09	0.07	1
Hira	0.0534114	0.448863	0.068	0.05	1
Scyl1	0.00116907	0.448686	0.282	0.227	1
Ints9	0.410458	0.448495	0.052	0.046	1
Wwox	0.153293	0.448301	0.063	0.05	1
Rp2	0.00251168	0.44818	0.187	0.141	1
Trmt1	0.00545819	0.447804	0.153	0.114	1
Nvl	0.00716664	0.447546	0.156	0.118	1
Pip5k1b	0.0351859	0.44753	0.102	0.078	1
Mfsd7a	0.573295	0.447455	0.019	0.017	1
Mdn1	0.335038	0.447225	0.047	0.039	1
Golim4	1.94368e-08	0.447113	0.578	0.485	0.000388444
Zfp729a	0.192976	0.447095	0.047	0.037	1
Tgfbrap1	0.128588	0.44698	0.063	0.048	1
Cfap43	0.485423	0.446813	0.046	0.041	1
1190007I07Rik	0.315507	0.446689	0.08	0.07	1
Bst2	2.80431e-05	0.446497	0.411	0.335	0.560441
Cln8	0.0816905	0.446257	0.073	0.056	1
Hspa4l	0.00524796	0.446211	0.174	0.135	1
Xndc1	0.282993	0.446125	0.044	0.036	1
Nudt10	0.562856	0.446048	0.015	0.013	1
Clmp	0.499248	0.44562	0.042	0.037	1
Tnfrsf12a	6.2849e-10	0.445422	0.604	0.483	1.25604e-05
P3h3	5.7119e-06	0.445365	0.462	0.386	0.114152
Kpna2	0.245842	0.445278	0.035	0.027	1
Dhrs7	8.71347e-05	0.444985	0.349	0.283	1
Ttll12	0.197031	0.444699	0.064	0.052	1
Fgfr2	0.0252918	0.444697	0.134	0.105	1
Ankrd12	8.53665e-07	0.444689	0.412	0.318	0.0170605
Prdx4	5.69663e-12	0.444652	0.671	0.596	1.13847e-07
Myo1h	0.369044	0.444647	0.019	0.014	1
Nacc1	0.00849038	0.443687	0.154	0.118	1
Kctd9	0.109879	0.443498	0.087	0.07	1
Prx	0.346672	0.443492	0.022	0.017	1
Slco3a1	2.11549e-07	0.443328	0.355	0.257	0.0042278
Emc9	0.000435475	0.442915	0.206	0.149	1
Zfp839	0.236736	0.442725	0.048	0.038	1
B3gntl1	0.288664	0.442208	0.015	0.01	1
Lcorl	0.733781	0.441773	0.03	0.028	1
Abhd8	0.000568363	0.441693	0.225	0.169	1
Kdm4b	0.274742	0.441267	0.062	0.052	1
Tmem218	0.0271072	0.441197	0.131	0.103	1
Itch	0.00328694	0.441168	0.217	0.174	1
Pcbp4	0.00343129	0.441029	0.185	0.141	1
Dnajc10	2.58277e-08	0.440837	0.516	0.413	0.000516166
Islr	7.03058e-08	0.44068	0.487	0.386	0.00140506
Arhgap12	0.0108829	0.44049	0.12	0.088	1
Bop1	0.00516976	0.440444	0.151	0.112	1
Myo19	0.361214	0.44008	0.011	0.008	1
Arap2	0.000494148	0.439844	0.282	0.225	1
Tmem109	3.99941e-10	0.439703	0.634	0.544	7.99281e-06
Kif1a	0.0742547	0.439656	0.021	0.011	1
Sag	0.0823299	0.439644	0.062	0.046	1
Rassf7	0.331037	0.439627	0.047	0.039	1
Egln3	0.116531	0.439489	0.049	0.036	1
Slc39a6	0.0149145	0.439287	0.185	0.149	1
Zfp932	0.119339	0.439025	0.05	0.037	1
Lars	0.000279357	0.438966	0.293	0.231	1
Polr3e	0.0651138	0.438782	0.075	0.056	1
Kif1b	0.000515619	0.438756	0.317	0.258	1
Ntrk3	8.77271e-05	0.438698	0.315	0.247	1
Tbc1d32	0.614879	0.438663	0.028	0.025	1
AI314180	0.064547	0.438526	0.174	0.149	1
E130006D01Rik	0.226585	0.438361	0.028	0.02	1
1600002K03Rik	0.00875315	0.438185	0.094	0.064	1
Synj2	0.0253984	0.43763	0.1	0.075	1
Meis2	6.15956e-08	0.437268	0.527	0.428	0.00123099
Ppp1r9b	0.075981	0.437244	0.111	0.09	1
Dcbld1	0.291908	0.43708	0.015	0.01	1
Strbp	0.000276484	0.436937	0.171	0.118	1
Ddx17	9.23621e-05	0.436893	0.329	0.258	1
Nisch	5.1734e-06	0.436541	0.463	0.38	0.10339
Fbxo31	0.0115467	0.436145	0.189	0.154	1
Frat1	0.326407	0.436143	0.019	0.014	1
Fbxo5	0.43406	0.43611	0.015	0.011	1
Proser1	0.0808394	0.436024	0.05	0.036	1
Id4	4.55442e-06	0.435925	0.4	0.314	0.0910201
Gzf1	0.0827515	0.435846	0.084	0.066	1
Gab3	0.771884	0.435584	0.011	0.01	1
Nhej1	0.169109	0.435555	0.038	0.028	1
Napb	0.17106	0.435552	0.028	0.019	1
Fdft1	0.0061642	0.435414	0.134	0.098	1
Gm15706	0.191016	0.435314	0.017	0.01	1
Enah	4.10983e-17	0.435267	0.822	0.74	8.21349e-13
Lrp1	2.31606e-10	0.435161	0.524	0.391	4.62864e-06
Syt15	0.0122794	0.435012	0.071	0.046	1
Dusp8	1.31881e-05	0.434834	0.385	0.306	0.263565
Ahnak2	5.7492e-05	0.434811	0.382	0.311	1
Cspg4	6.79229e-09	0.434207	0.538	0.424	0.000135744
Carns1	0.023203	0.43379	0.133	0.103	1
Eif4g1	1.51806e-06	0.43352	0.495	0.414	0.0303385
Cdk16	0.0403625	0.433384	0.147	0.121	1
Kbtbd12	0.847781	0.433312	0.01	0.009	1
Lmbrd1	3.57858e-05	0.433237	0.384	0.313	0.715179
Fmo3	3.13436e-05	0.433223	0.207	0.141	0.626402
Zer1	0.0178938	0.433095	0.162	0.128	1
Uggt1	0.0623622	0.433091	0.11	0.089	1
Cpsf1	0.167365	0.432999	0.042	0.032	1
Adcy3	0.0242261	0.43277	0.088	0.064	1
Chrnb3	0.268733	0.432351	0.015	0.01	1
Irak2	3.66999e-06	0.432284	0.392	0.309	0.0733448
Meis1	0.00266785	0.431932	0.204	0.159	1
Mfsd3	0.405738	0.431782	0.031	0.025	1
Zbtb6	0.00917813	0.431766	0.075	0.048	1
Sh3pxd2b	0.0432535	0.431692	0.11	0.086	1
Rhbdd1	0.0253421	0.43145	0.101	0.075	1
Cdkn2aipnl	0.0350674	0.431366	0.072	0.051	1
Nob1	0.0161816	0.431018	0.129	0.098	1
Atg10	0.00962963	0.430386	0.154	0.119	1
Sel1l	0.0335709	0.430247	0.184	0.155	1
Iqcc	0.0158328	0.429925	0.08	0.055	1
Lsm11	0.106464	0.429893	0.049	0.036	1
Pard6a	0.0160887	0.429495	0.084	0.058	1
Ldlrad4	0.044125	0.429489	0.147	0.121	1
Yod1	0.00790056	0.428594	0.15	0.114	1
Srebf1	0.00503723	0.428522	0.161	0.122	1
Lmo7	0.106822	0.428426	0.082	0.065	1
Gm26601	0.15877	0.428376	0.033	0.023	1
Foxn3	3.7398e-13	0.428339	0.771	0.679	7.47398e-09
Farsa	0.00857171	0.42807	0.196	0.158	1
Gaa	0.000957055	0.427777	0.249	0.193	1
Prkca	0.287651	0.427765	0.1	0.089	1
Sat1	1.11905e-05	0.427755	0.787	0.737	0.223641
Dnmt1	0.11701	0.427441	0.074	0.058	1
Tefm	0.421741	0.427307	0.033	0.028	1
Ccdc167	0.00534555	0.426976	0.102	0.069	1
Gnpda1	0.0630855	0.426763	0.057	0.041	1
Slc16a1	0.349194	0.426588	0.032	0.025	1
Ndufaf6	0.144067	0.426584	0.062	0.048	1
Zfp329	0.00399231	0.426332	0.139	0.1	1
Foxo6	0.0194432	0.426247	0.02	0.008	1
Armcx2	0.00352767	0.426205	0.162	0.122	1
Ddx49	0.0988117	0.425991	0.079	0.062	1
H2-D1	2.76236e-14	0.425804	0.777	0.67	5.52058e-10
Anks1	0.0227629	0.425579	0.095	0.07	1
Ctgf	9.28589e-20	0.425383	0.984	0.925	1.85578e-15
Armcx6	0.595244	0.425316	0.017	0.014	1
Fam117b	0.236787	0.425306	0.067	0.056	1
Atoh8	0.000121295	0.424936	0.306	0.236	1
S100a4	7.46444e-12	0.424908	0.495	0.357	1.49177e-07
H13	8.57204e-06	0.424669	0.355	0.273	0.171312
Kif3a	0.000821127	0.424446	0.256	0.198	1
S100a8	0.801237	0.424139	0.018	0.017	1
Ifngr2	2.76992e-07	0.42318	0.519	0.426	0.00553568
Slc8a1	0.0114578	0.42302	0.097	0.067	1
Pla2g6	0.318746	0.422753	0.029	0.023	1
Hes6	0.00585006	0.422575	0.145	0.107	1
Cfl2	3.18234e-26	0.422282	0.921	0.841	6.35991e-22
Zfp775	0.091196	0.422157	0.078	0.061	1
mt-Nd6	0.0194901	0.42196	0.169	0.136	1
Pdk2	0.0309458	0.421895	0.144	0.114	1
Tcf7l2	2.30398e-07	0.421756	0.556	0.461	0.00460451
Txndc15	3.4426e-05	0.421721	0.404	0.33	0.688004
Syn3	0.00445083	0.420803	0.07	0.042	1
Cog6	0.0926638	0.420666	0.126	0.105	1
Dgcr8	0.109474	0.420576	0.08	0.064	1
Nsd2	0.462487	0.42033	0.069	0.062	1
Ggcx	0.000766234	0.420141	0.169	0.119	1
Gm28523	0.572266	0.420121	0.015	0.013	1
Tm2d3	2.59703e-06	0.419957	0.314	0.227	0.0519017
Flna	1.09921e-30	0.419899	0.992	0.972	2.19676e-26
Timm29	0.0618256	0.419787	0.138	0.114	1
Snx10	0.0771415	0.419756	0.114	0.093	1
Cdip1	0.0137084	0.419673	0.13	0.098	1
Nr3c1	2.5707e-06	0.419588	0.501	0.424	0.0513754
1110008P14Rik	0.000341372	0.419559	0.354	0.288	1
Ormdl3	7.52796e-06	0.419482	0.37	0.288	0.150446
Tspyl3	0.145315	0.418073	0.011	0.005	1
Gorasp1	0.259392	0.417962	0.102	0.09	1
Nbl1	1.18377e-08	0.417399	0.379	0.267	0.000236577
Phkb	0.00201483	0.417004	0.206	0.158	1
Lyst	0.0294376	0.416907	0.179	0.149	1
Spsb2	0.0354093	0.416362	0.165	0.137	1
5033430I15Rik	0.269692	0.416323	0.062	0.052	1
Snx13	0.141365	0.416234	0.126	0.109	1
Zfp952	0.114123	0.416056	0.038	0.027	1
Tnks2	0.00281357	0.416041	0.208	0.163	1
Abhd13	0.168257	0.415768	0.087	0.072	1
Rars	0.00441106	0.415704	0.263	0.217	1
Tbc1d20	0.0114059	0.415639	0.187	0.15	1
Coil	0.618154	0.415372	0.028	0.025	1
Ccnd3	6.07144e-08	0.415101	0.532	0.431	0.00121338
Gpcpd1	0.00900611	0.414824	0.178	0.139	1
Tvp23b	7.46989e-06	0.41463	0.522	0.451	0.149286
Lyrm1	0.167073	0.414574	0.075	0.061	1
Rnmt	0.0354414	0.414371	0.138	0.111	1
Psmf1	0.0194273	0.414343	0.138	0.108	1
Bbs5	0.0353269	0.414174	0.094	0.07	1
Zfp141	0.696727	0.413904	0.017	0.015	1
Usp50	0.040705	0.413831	0.107	0.083	1
Mga	0.000192614	0.413636	0.265	0.199	1
Cep128	0.344463	0.413511	0.02	0.015	1
Tmed4	5.49775e-08	0.413025	0.535	0.442	0.00109873
Lsp1	0.000843816	0.412977	0.124	0.08	1
Plekha1	0.00201355	0.41291	0.243	0.193	1
Mpp7	0.000766091	0.412883	0.281	0.225	1
Fbn1	3.17247e-05	0.412841	0.341	0.264	0.634018
Zfp281	0.0293932	0.412838	0.139	0.112	1
Plekhm1	0.367422	0.412462	0.03	0.024	1
Tlr3	0.192686	0.412335	0.03	0.022	1
Kdm3b	0.0783502	0.412268	0.102	0.081	1
Cerk	0.0200338	0.41223	0.144	0.113	1
Airn	0.0240307	0.412182	0.157	0.126	1
Iars	0.09367	0.412168	0.122	0.102	1
Ccdc68	0.00415204	0.412008	0.199	0.154	1
Svil	6.20479e-11	0.411922	0.702	0.604	1.24003e-06
Cmas	0.000162828	0.411653	0.289	0.224	1
Ptcd3	0.0502705	0.411594	0.141	0.116	1
Heatr5b	0.10631	0.411412	0.082	0.065	1
Adamtsl5	1.09101e-05	0.411258	0.358	0.274	0.218039
Sirt6	0.0803909	0.411112	0.1	0.08	1
Ccdc163	0.021034	0.410864	0.104	0.076	1
AC149090.1	3.42594e-05	0.410728	0.54	0.465	0.684675
Ids	0.0138656	0.410533	0.239	0.202	1
Slc10a7	0.260782	0.410521	0.054	0.044	1
Cenpo	0.210472	0.410217	0.018	0.011	1
Tsr3	0.12765	0.410189	0.108	0.09	1
Polr3c	0.0660368	0.410162	0.091	0.071	1
AW549877	0.0191654	0.4099	0.184	0.15	1
Ptprd	0.0157883	0.409873	0.211	0.174	1
Gm15446	0.316548	0.40972	0.016	0.011	1
Rfx5	0.0319974	0.409682	0.032	0.018	1
Mnd1	0.130014	0.409535	0.024	0.015	1
Zc2hc1c	0.637228	0.409497	0.011	0.009	1
Fam172a	0.00779491	0.409405	0.214	0.173	1
Csf2ra	0.037956	0.409253	0.025	0.013	1
Usp38	0.212962	0.409129	0.054	0.043	1
Pigh	0.0809424	0.409022	0.076	0.058	1
Dnaja4	0.0600725	0.408817	0.101	0.079	1
Usp9x	7.57289e-05	0.408571	0.355	0.287	1
Aph1a	0.000876218	0.407895	0.293	0.235	1
Extl2	0.109869	0.40733	0.095	0.078	1
Eif5a2	0.21521	0.406985	0.052	0.042	1
Nek3	0.648513	0.406902	0.026	0.023	1
Fam45a	0.000111409	0.406802	0.264	0.194	1
Rnf135	0.275676	0.406232	0.018	0.013	1
mt-Cytb	2.91079e-50	0.406128	1	1	5.81721e-46
Gab2	0.0781174	0.405841	0.108	0.088	1
Trp53i13	0.00128587	0.405746	0.272	0.217	1
Zfp408	0.192856	0.405529	0.012	0.006	1
Fblim1	4.39805e-22	0.405497	0.939	0.86	8.7895e-18
Cmpk2	0.288161	0.404963	0.015	0.01	1
Gm15417	0.0105077	0.404914	0.221	0.182	1
Atad3aos	0.554771	0.404771	0.01	0.008	1
Secisbp2l	8.42835e-05	0.404737	0.381	0.309	1
Parp1	0.0490915	0.404181	0.131	0.107	1
Itm2c	9.01579e-09	0.404086	0.61	0.521	0.000180181
Asnsd1	0.795823	0.404053	0.076	0.075	1
Blcap	0.132848	0.404024	0.11	0.093	1
Zdhhc16	0.158598	0.403994	0.05	0.038	1
Josd2	5.20946e-06	0.403874	0.482	0.404	0.104111
Tmed1	0.00211	0.4038	0.202	0.155	1
2510039O18Rik	0.0078104	0.403709	0.192	0.152	1
Lyrm2	0.0182019	0.403071	0.134	0.103	1
Bet1l	0.00183871	0.403021	0.262	0.21	1
Ncoa3	2.51209e-05	0.402947	0.537	0.464	0.50204
Cebpzos	0.10661	0.402697	0.089	0.072	1
1810055G02Rik	0.0449497	0.402541	0.155	0.127	1
Acyp2	9.42447e-06	0.402365	0.392	0.316	0.188348
Rint1	0.0205268	0.402337	0.1	0.072	1
Kansl3	0.037522	0.402121	0.21	0.18	1
Ctsa	4.74957e-09	0.402049	0.537	0.419	9.49202e-05
Hsdl1	0.0371035	0.401893	0.135	0.107	1
Tia1	0.0029271	0.401364	0.183	0.139	1
Mtrf1	0.286585	0.401084	0.037	0.029	1
Mtg2	0.0577257	0.400996	0.168	0.141	1
Sh3rf3	0.384428	0.400979	0.01	0.006	1
Pcdhb22	0.296868	0.40073	0.018	0.013	1
Tmem185b	0.0451579	0.400521	0.085	0.064	1
Klhl28	0.440861	0.400199	0.068	0.061	1
Atp6ap1	3.09591e-09	0.398736	0.617	0.516	6.18718e-05
Selenos	3.4448e-12	0.398578	0.704	0.609	6.88444e-08
Insr	0.0189461	0.39844	0.17	0.136	1
Gm2a	1.30596e-08	0.398338	0.618	0.515	0.000260996
Nfat5	9.5933e-06	0.398273	0.377	0.297	0.191722
Timm23	0.365494	0.39799	0.031	0.025	1
Pex16	0.0769695	0.397758	0.125	0.103	1
Sun2	7.26528e-08	0.39761	0.594	0.497	0.00145197
Ipo13	0.492269	0.397511	0.051	0.046	1
Nfatc3	0.0326003	0.397353	0.121	0.094	1
Rab1b	0.000615554	0.397211	0.281	0.222	1
Acsf3	0.432735	0.397124	0.017	0.013	1
Palm	0.0197506	0.39706	0.195	0.16	1
Mms19	0.176235	0.396314	0.063	0.051	1
Slc9a1	0.31264	0.396072	0.063	0.053	1
Atp23	0.344371	0.395975	0.041	0.034	1
Adcy5	2.11398e-10	0.395954	0.696	0.596	4.2248e-06
Acp6	0.0360745	0.39593	0.076	0.055	1
B4galt6	0.256659	0.395852	0.083	0.071	1
Srcap	0.0644108	0.39565	0.103	0.081	1
Aven	0.0694383	0.395473	0.124	0.102	1
Scn2a	0.155052	0.395382	0.061	0.048	1
Pccb	0.24874	0.395373	0.085	0.074	1
Stard13	0.0707681	0.39499	0.073	0.055	1
Xxylt1	0.0495375	0.394575	0.114	0.09	1
Manbal	1.4005e-05	0.394565	0.448	0.371	0.279889
Ctps2	0.105714	0.394531	0.165	0.146	1
Lrfn3	0.3126	0.394511	0.032	0.025	1
Phc1	0.0159276	0.394254	0.078	0.052	1
Fam131a	0.0163088	0.394237	0.124	0.093	1
Wfs1	0.00428983	0.393955	0.17	0.128	1
Slc4a8	0.20963	0.393827	0.061	0.05	1
Supt7l	0.227934	0.393701	0.081	0.069	1
Slc9a6	0.0236933	0.393491	0.144	0.113	1
Ctnnb1	1.90098e-10	0.393254	0.731	0.653	3.79911e-06
Sypl	1.60025e-13	0.393105	0.819	0.706	3.19811e-09
6030458C11Rik	0.110841	0.39305	0.065	0.05	1
Gcn1l1	0.0938861	0.392776	0.145	0.123	1
C1qtnf12	0.0841529	0.392152	0.087	0.069	1
Sppl2b	0.0363419	0.39215	0.096	0.071	1
Skiv2l	0.113125	0.39214	0.128	0.109	1
Vamp2	9.07948e-10	0.391894	0.615	0.516	1.81453e-05
Polrmt	0.092184	0.391731	0.047	0.033	1
Anks6	0.442247	0.391711	0.029	0.024	1
Gnptg	0.0554728	0.391687	0.097	0.075	1
Tspyl2	0.0429153	0.391645	0.114	0.089	1
Nsun5	0.338933	0.391526	0.062	0.053	1
Nlrx1	0.182526	0.391483	0.056	0.044	1
Nktr	1.23039e-06	0.391326	0.503	0.419	0.0245893
Tmem110	3.43615e-06	0.391062	0.525	0.437	0.0686714
H1f0	0.0052799	0.390891	0.35	0.305	1
Lpin3	0.406185	0.39077	0.044	0.038	1
Srebf2	0.000100502	0.390638	0.312	0.243	1
Yipf6	0.0296846	0.39061	0.134	0.105	1
Lrp10	6.43621e-05	0.390469	0.446	0.377	1
Ttll5	0.17866	0.390219	0.033	0.024	1
[truncated: 9,839 more rows]

## Sheet: Humam_Orthologue_Coversion
List of transcripts differentially detected in mouse Tgfbr1(M318R/+) VSMC1 relative to Tgfbr1(M318R/+) VSMC2 (Pct >0.2 in higher expressing sample, Adj P<0.05, Abs FC > 1) and conversion to Human Orthologue prior to ClueGo and EnrichR analysis. Logs and enrichment resulst are shown in subsequent tabs.
LDS VSMC1 > LDS VSMC2
initial_mouse_gene	initial_ensg	Human ortholog_name	ortholog_ensg
Npr1	ENSMUSG00000027931	NPR1	ENSG00000169418
Mylk4	ENSMUSG00000044951	MYLK4	ENSG00000145949
Tes	ENSMUSG00000029552	TES	ENSG00000135269
Ncam1	ENSMUSG00000039542	NCAM1	ENSG00000149294
Dsp	ENSMUSG00000054889	DSP	ENSG00000096696
Osr1	ENSMUSG00000048387	OSR1	ENSG00000143867
Sost	ENSMUSG00000001494	SOST	ENSG00000167941
2210407C18Rik	N/A	N/A	N/A
Adcy1	ENSMUSG00000020431	ADCY1	ENSG00000164742
Emb	ENSMUSG00000021728	EMB	ENSG00000170571
Prdm6	ENSMUSG00000069378	PRDM6	ENSG00000061455
Tpd52l1	ENSMUSG00000000296	TPD52L1	ENSG00000111907
Sema3d	ENSMUSG00000040254	SEMA3D	ENSG00000153993
Sgcg	ENSMUSG00000035296	SGCG	ENSG00000102683
Postn	ENSMUSG00000027750	POSTN	ENSG00000133110
Aqp1	ENSMUSG00000004655	AQP1	ENSG00000240583
Eln	ENSMUSG00000029675	ELN	ENSG00000049540
Hotairm1	ENSMUSG00000087658	HOTAIRM1	ENSG00000233429
Ptprz1	ENSMUSG00000068748	PTPRZ1	ENSG00000106278
Aebp1	ENSMUSG00000020473	AEBP1	ENSG00000106624
Cdkl5	ENSMUSG00000031292	CDKL5	ENSG00000008086
Ano1	ENSMUSG00000031075	ANO1	ENSG00000131620
Pamr1	ENSMUSG00000027188	PAMR1	ENSG00000149090
Gja1	ENSMUSG00000050953	GJA1	ENSG00000152661
Pdlim4	ENSMUSG00000020388	PDLIM4	ENSG00000131435
Gxylt2	ENSMUSG00000030074	GXYLT2	ENSG00000172986
Limch1	ENSMUSG00000037736	LIMCH1	ENSG00000064042
Col15a1	ENSMUSG00000028339	COL15A1	ENSG00000204291
Nrtn	ENSMUSG00000039481	NRTN	ENSG00000171119
Thsd4	ENSMUSG00000032289	THSD4	ENSG00000187720
Bdnf	ENSMUSG00000048482	BDNF	ENSG00000176697
Hoxb2	ENSMUSG00000075588	HOXB2	ENSG00000173917
Hoxa3	ENSMUSG00000079560	HOXA3	ENSG00000105997
Sema3b	ENSMUSG00000057969	SEMA3B	ENSG00000012171
Nupr1	ENSMUSG00000030717	NUPR1	ENSG00000176046
Mgat4a	ENSMUSG00000026110	MGAT4A	ENSG00000071073
Cdo1	ENSMUSG00000033022	CDO1	ENSG00000129596
Creb5	ENSMUSG00000053007	CREB5	ENSG00000146592
Mfap4	ENSMUSG00000042436	MFAP4	ENSG00000166482
Rhobtb1	ENSMUSG00000019944	RHOBTB1	ENSG00000072422
Slc24a3	ENSMUSG00000063873	SLC24A3	ENSG00000185052
1190005I06Rik	ENSMUSG00000043687	C16orf74	ENSG00000154102
Lrrc17	ENSMUSG00000039883	LRRC17	ENSG00000128606
Hoxb3os	ENSMUSG00000084844	HOXB-AS1	ENSG00000230148
St5	ENSMUSG00000031024	DENND2B	ENSG00000166444
Sgcd	ENSMUSG00000020354	SGCD	ENSG00000170624
Wnt16	ENSMUSG00000029671	WNT16	ENSG00000002745
Antxr2	ENSMUSG00000029338	ANTXR2	ENSG00000163297
Osbpl3	ENSMUSG00000029822	OSBPL3	ENSG00000070882
Adam33	ENSMUSG00000027318	ADAM33	ENSG00000149451
Nav2	ENSMUSG00000052512	NAV2	ENSG00000166833
Alcam	ENSMUSG00000022636	ALCAM	ENSG00000170017
Igsf9b	ENSMUSG00000034275	IGSF9B	ENSG00000080854
Npnt	ENSMUSG00000040998	NPNT	ENSG00000168743
Pam	ENSMUSG00000026335	PAM	ENSG00000145730
Mettl24	ENSMUSG00000045555	METTL24	ENSG00000053328
Myh10	ENSMUSG00000020900	MYH10	ENSG00000133026
Gga2	ENSMUSG00000030872	GGA2	ENSG00000103365
Col4a6	ENSMUSG00000031273	COL4A6	ENSG00000197565
Skap2	ENSMUSG00000059182	SKAP2	ENSG00000005020
E030013I19Rik	ENSMUSG00000086843	N/A	N/A
Wwp2	ENSMUSG00000031930	WWP2	ENSG00000198373
Ccdc141	ENSMUSG00000044033	CCDC141	ENSG00000163492
Wscd2	ENSMUSG00000063430	WSCD2	ENSG00000075035
Itga9	ENSMUSG00000039115	ITGA9	ENSG00000144668
Tspan5	ENSMUSG00000028152	TSPAN5	ENSG00000168785
Suclg2	ENSMUSG00000061838	SUCLG2	ENSG00000172340
Xpr1	ENSMUSG00000026469	XPR1	ENSG00000143324
Celf2	ENSMUSG00000002107	CELF2	ENSG00000048740
St3gal5	ENSMUSG00000056091	ST3GAL5	ENSG00000115525
Tnnt2	ENSMUSG00000026414	TNNT2	ENSG00000118194
Scube3	ENSMUSG00000038677	SCUBE3	ENSG00000146197
Tnfrsf11b	ENSMUSG00000063727	TNFRSF11B	ENSG00000164761
Napepld	ENSMUSG00000044968	NAPEPLD	ENSG00000161048
Col18a1	ENSMUSG00000001435	COL18A1	ENSG00000182871
Gabra3	ENSMUSG00000031343	GABRA3	ENSG00000011677
Mtss1	ENSMUSG00000022353	MTSS1	ENSG00000170873
Ctsh	ENSMUSG00000032359	CTSH	ENSG00000103811
Smim3	ENSMUSG00000038059	SMIM3	ENSG00000256235
Galnt16	ENSMUSG00000021130	GALNT16	ENSG00000100626
Shisa4	ENSMUSG00000041889	SHISA4	ENSG00000198892
Chd3	ENSMUSG00000018474	CHD3	ENSG00000170004
Lgr6	ENSMUSG00000042793	LGR6	ENSG00000133067
Pkp4	ENSMUSG00000026991	PKP4	ENSG00000144283
Cdh13	ENSMUSG00000031841	CDH13	ENSG00000140945
Cpe	ENSMUSG00000037852	CPE	ENSG00000109472
Sod3	ENSMUSG00000072941	SOD3	ENSG00000109610
Ace	ENSMUSG00000020681	ACE	ENSG00000159640
Pcdh7	ENSMUSG00000029108	PCDH7	ENSG00000169851
Sema3f	ENSMUSG00000034684	SEMA3F	ENSG00000001617
LDS VSMC2 > LDS VSMC1
initial_mouse_gene	initial_ensg	Human ortholog_name	ortholog_ensg
Thbs1	ENSMUSG00000040152	THBS1	ENSG00000137801
Pgam2	ENSMUSG00000020475	PGAM2	ENSG00000164708
Gja4	ENSMUSG00000050234	GJA4	ENSG00000187513
Lpl	ENSMUSG00000015568	LPL	ENSG00000175445
Pln	ENSMUSG00000038583	PLN	ENSG00000198523
Sncg	ENSMUSG00000023064	SNCG	ENSG00000173267
Naalad2	ENSMUSG00000043943	NAALAD2	ENSG00000077616
Tmem215	ENSMUSG00000046593	TMEM215	ENSG00000188133
Palld	ENSMUSG00000058056	PALLD	ENSG00000129116
Enpep	ENSMUSG00000028024	ENPEP	ENSG00000138792
Cpxm2	ENSMUSG00000030862	CPXM2	ENSG00000121898
Rasd1	ENSMUSG00000049892	RASD1	ENSG00000108551
Dcn	ENSMUSG00000019929	DCN	ENSG00000011465
Igfbp5	ENSMUSG00000026185	IGFBP5	ENSG00000115461
Notch3	ENSMUSG00000038146	NOTCH3	ENSG00000074181
Col8a1	ENSMUSG00000068196	COL8A1	ENSG00000144810
Apoe	ENSMUSG00000002985	APOE	ENSG00000130203
Ntn4	ENSMUSG00000020019	NTN4	ENSG00000074527
Sorbs2	ENSMUSG00000031626	SORBS2	ENSG00000154556
Rarres1	ENSMUSG00000049404	RARRES1	ENSG00000118849
Pde1a	ENSMUSG00000059173	PDE1A	ENSG00000115252
Cxcl1	ENSMUSG00000029380	CXCL1	ENSG00000163739
Ankrd1	ENSMUSG00000024803	ANKRD1	ENSG00000148677
C1s1	ENSMUSG00000038521	C1S	ENSG00000182326
Tmem176a	ENSMUSG00000023367	TMEM176A	ENSG00000002933
Trim2	ENSMUSG00000027993	TRIM2	ENSG00000109654
Tsc22d3	ENSMUSG00000031431	TSC22D3	ENSG00000157514
Mlf1	ENSMUSG00000048416	MLF1	ENSG00000178053
Msx1	ENSMUSG00000048450	MSX1	ENSG00000163132
Serpinf1	ENSMUSG00000000753	SERPINF1	ENSG00000132386
Fhl2	ENSMUSG00000008136	FHL2	ENSG00000115641
Corin	ENSMUSG00000005220	CORIN	ENSG00000145244
Parm1	ENSMUSG00000034981	PARM1	ENSG00000169116
Pcolce	ENSMUSG00000029718	PCOLCE	ENSG00000106333
Nr2f2	ENSMUSG00000030551	NR2F2	ENSG00000185551
Dgkb	ENSMUSG00000036095	DGKB	ENSG00000136267
Cdkn2c	ENSMUSG00000028551	CDKN2C	ENSG00000123080
Susd2	ENSMUSG00000006342	SUSD2	ENSG00000099994
Prrx1	ENSMUSG00000026586	PRRX1	ENSG00000116132
Tbx2	ENSMUSG00000000093	TBX2	ENSG00000121068
Tmem51	ENSMUSG00000040616	TMEM51	ENSG00000171729
Tmem176b	ENSMUSG00000029810	TMEM176B	ENSG00000106565
Esam	ENSMUSG00000001946	ESAM	ENSG00000149564
Bex4	ENSMUSG00000047844	BEX4	ENSG00000102409
Sept11	ENSMUSG00000058013	SEPTIN11	ENSG00000138758
Hes1	ENSMUSG00000022528	HES1	ENSG00000114315
Irf1	ENSMUSG00000018899	IRF1	ENSG00000125347
Ckb	ENSMUSG00000001270	CKB	ENSG00000166165
Lum	ENSMUSG00000036446	LUM	ENSG00000139329
Gng11	ENSMUSG00000032766	GNG11	ENSG00000127920
Nr4a2	ENSMUSG00000026826	NR4A2	ENSG00000153234
Igfbp4	ENSMUSG00000017493	IGFBP4	ENSG00000141753
Ndrg1	ENSMUSG00000005125	NDRG1	ENSG00000104419
C1ra	ENSMUSG00000055172	C1R	ENSG00000159403
Epb41	ENSMUSG00000028906	EPB41	ENSG00000159023
Raph1	ENSMUSG00000026014	RAPH1	ENSG00000173166
Adamts1	ENSMUSG00000022893	ADAMTS1	ENSG00000154734
Tesc	ENSMUSG00000029359	TESC	ENSG00000088992
Slc5a3	ENSMUSG00000089774	SLC5A3	ENSG00000198743
Rgs4	ENSMUSG00000038530	RGS4	ENSG00000117152
Bmp2	ENSMUSG00000027358	BMP2	ENSG00000125845
Tmem204	ENSMUSG00000024168	TMEM204	ENSG00000131634
Lxn	ENSMUSG00000047557	LXN	ENSG00000079257
Mrps6	ENSMUSG00000039680	MRPS6	ENSG00000243927
Rpa1	ENSMUSG00000000751	RPA1	ENSG00000132383
Cobll1	ENSMUSG00000034903	COBLL1	ENSG00000082438
Hmgb2	ENSMUSG00000054717	HMGB2	ENSG00000164104
Crim1	ENSMUSG00000024074	CRIM1	ENSG00000150938
Mustn1	ENSMUSG00000042485	MUSTN1	ENSG00000272573
Pla2g16	ENSMUSG00000060675	PLAAT3	ENSG00000176485
Gm12840	ENSMUSG00000086320	N/A	N/A
Gadd45b	ENSMUSG00000015312	GADD45B	ENSG00000099860
Zeb2	ENSMUSG00000026872	ZEB2	ENSG00000169554
Plk2	ENSMUSG00000021701	PLK2	ENSG00000145632
Tuba1c	ENSMUSG00000043091	TUBA1C	ENSG00000167553
Tbx20	ENSMUSG00000031965	TBX20	ENSG00000164532
Cd34	ENSMUSG00000016494	CD34	ENSG00000174059
Cited2	ENSMUSG00000039910	CITED2	ENSG00000164442
Gata4	ENSMUSG00000021944	GATA4	ENSG00000136574
Itpk1	ENSMUSG00000057963	ITPK1	ENSG00000100605
Cp	ENSMUSG00000003617	CP	ENSG00000047457
Sorbs1	ENSMUSG00000025006	SORBS1	ENSG00000095637
Apbb2	ENSMUSG00000029207	APBB2	ENSG00000163697
Cd302	ENSMUSG00000060703	CD302	ENSG00000241399
Tgfb3	ENSMUSG00000021253	TGFB3	ENSG00000119699
Aspn	ENSMUSG00000021388	ASPN	ENSG00000106819
Pnp	ENSMUSG00000115338	PNP	ENSG00000198805
Ndn	ENSMUSG00000033585	NDN	ENSG00000182636
Gsn	ENSMUSG00000026879	GSN	ENSG00000148180
Sertad1	ENSMUSG00000008384	SERTAD1	ENSG00000197019
Cdkn1a	ENSMUSG00000023067	CDKN1A	ENSG00000124762
Pcp4l1	ENSMUSG00000038370	PCP4L1	ENSG00000248485
Hexim1	ENSMUSG00000048878	HEXIM1	ENSG00000186834
Synm	ENSMUSG00000030554	SYNM	ENSG00000182253
Serpini1	ENSMUSG00000027834	SERPINI1	ENSG00000163536
Ppp1r10	ENSMUSG00000039220	PPP1R10	ENSG00000204569
Ptp4a3	ENSMUSG00000059895	PTP4A3	ENSG00000184489
Ccdc3	ENSMUSG00000026676	CCDC3	ENSG00000151468
Epas1	ENSMUSG00000024140	EPAS1	ENSG00000116016
Crip1	ENSMUSG00000006360	CRIP1	ENSG00000213145
Cfh	ENSMUSG00000026365	CFH	ENSG00000000971
Slc43a3	ENSMUSG00000027074	SLC43A3	ENSG00000134802
Abhd2	ENSMUSG00000039202	ABHD2	ENSG00000140526

## Sheet: ClueGO Results
ID	Term	Ontology Source	Term PValue	Term PValue Corrected with Benjamini-Hochberg	Group PValue	Group PValue Corrected with Benjamini-Hochberg	GOLevels	GOGroups	% Associated Genes	Nr. Genes	Cluster	Genes Cluster #1	Genes Cluster #2	%Genes Cluster #1	%Genes Cluster #2	%Genes Cluster #1.adjusted.to.input.list.size	%Genes Cluster #2.adjusted.to.input.list.size	Associated Genes Found
CUSTOM:HALLMARK_ANGIOGENESIS_3	HALLMARK_ANGIOGENESIS	CUSTOM_h.all.v2023.2.Hs.symbols.gmt_09.04.2024	0.000673477	0.00286228	0.000673477	0.0009728	[-1]	Group00	11.1111	4	Specific for Cluster #2	[POSTN]	[LPL, LUM, MSX1]	25	75	25.9325	74.0675	[LPL, LUM, MSX1, POSTN]
R-HSA:3000178	ECM proteoglycans	REACTOME_Pathways_09.04.2024	2.21124e-05	0.000187955	2.21124e-05	4.79102e-05	[-1]	Group01	9.21053	7	None Specific Cluster	[COL4A6, ITGA9, NCAM1]	[ASPN, DCN, LUM, TGFB3]	42.8571	57.1429	44.0644	55.9356	[ASPN, COL4A6, DCN, ITGA9, LUM, NCAM1, TGFB3]
CUSTOM:HALLMARK_HYPOXIA_21	HALLMARK_HYPOXIA	CUSTOM_h.all.v2023.2.Hs.symbols.gmt_09.04.2024	8.49938e-05	0.00061924	8.49938e-05	0.000157846	[-1]	Group02	5	10	Specific for Cluster #2	[PAM, TES]	[CDKN1A, CITED2, CP, DCN, LXN, NDRG1, PGAM2, TGFB3]	20	80	20.7977	79.2023	[CDKN1A, CITED2, CP, DCN, LXN, NDRG1, PAM, PGAM2, TES, TGFB3]
CUSTOM:HALLMARK_MYOGENESIS_33	HALLMARK_MYOGENESIS	CUSTOM_h.all.v2023.2.Hs.symbols.gmt_09.04.2024	9.62687e-12	4.9097e-10	9.62687e-12	1.25149e-10	[-1]	Group03	9	18	Specific for Cluster #1	[AEBP1, CDH13, COL15A1, DENND2B, NAV2, NCAM1, SGCD, SGCG, SOD3, TNNT2, TPD52L1]	[CDKN1A, CKB, GADD45B, GSN, PGAM2, PTP4A3, SORBS1]	61.1111	38.8889	62.2722	37.7278	[AEBP1, CDH13, CDKN1A, CKB, COL15A1, DENND2B, GADD45B, GSN, NAV2, NCAM1, PGAM2, PTP4A3, SGCD, SGCG, SOD3, SORBS1, TNNT2, TPD52L1]
CUSTOM:WP2880_181	Glucocorticoid receptor pathway	CUSTOM_wikipathways-20240310-gmt-Homo-sapiens (1).gmt_09.04.2024	0.00111168	0.00283479	0.00111168	0.0013138	[-1]	Group04	7.14286	5	Specific for Cluster #2	[]	[ABHD2, ANKRD1, GADD45B, PLK2, TSC22D3]	0	100	0	100	[ABHD2, ANKRD1, GADD45B, PLK2, TSC22D3]
CUSTOM:HALLMARK_EPITHELIAL_MESENCHYMAL_TRANSITION_13	HALLMARK_EPITHELIAL_MESENCHYMAL_TRANSITION	CUSTOM_h.all.v2023.2.Hs.symbols.gmt_09.04.2024	9.62687e-12	4.9097e-10	9.62687e-12	1.25149e-10	[-1]	Group05	9	18	None Specific Cluster	[BDNF, ELN, GJA1, PDLIM4, POSTN, SGCD, SGCG, TNFRSF11B]	[CXCL1, DCN, GADD45B, IGFBP4, LUM, MSX1, PCOLCE, PRRX1, RGS4, THBS1]	44.4444	55.5556	45.6607	54.3393	[BDNF, CXCL1, DCN, ELN, GADD45B, GJA1, IGFBP4, LUM, MSX1, PCOLCE, PDLIM4, POSTN, PRRX1, RGS4, SGCD, SGCG, THBS1, TNFRSF11B]
bioplanet_1418	Interleukin-1 regulation of extracellular matrix	CUSTOM_BioPlanet-pathway.txt.txt_09.04.2024	9.4477e-07	2.40916e-05	9.4477e-07	6.14101e-06	[-1]	Group06	8.33333	10	Specific for Cluster #2	[SOD3, TNFRSF11B]	[BMP2, C1R, CFH, CXCL1, DCN, NR2F2, PLK2, RGS4]	20	80	20.7977	79.2023	[BMP2, C1R, CFH, CXCL1, DCN, NR2F2, PLK2, RGS4, SOD3, TNFRSF11B]
bioplanet_1433	TSH regulation of gene expression	CUSTOM_BioPlanet-pathway.txt.txt_09.04.2024	0.00076491	0.00243815	0.00076491	0.000994383	[-1]	Group07	6.18557	6	Specific for Cluster #2	[]	[ADAMTS1, CKB, GADD45B, HES1, NOTCH3, PLK2]	0	100	0	100	[ADAMTS1, CKB, GADD45B, HES1, NOTCH3, PLK2]
bioplanet_1444	Wnt interactions in lipid metabolism and immune response	CUSTOM_BioPlanet-pathway.txt.txt_09.04.2024	1.01732e-05	0.000129708	1.01732e-05	2.64503e-05	[-1]	Group08	13.3333	6	Specific for Cluster #2	[ELN, GJA1]	[APOE, COL8A1, CXCL1, HES1]	33.3333	66.6667	34.434	65.566	[APOE, COL8A1, CXCL1, ELN, GJA1, HES1]
bioplanet_24	Hypoxia and p53 in the cardiovascular system	CUSTOM_BioPlanet-pathway.txt.txt_09.04.2024	0.0020666	0.00421586	0.0020666	0.00223881	[-1]	Group09	13.0435	3	Specific for Cluster #2	[]	[CDKN1A, FHL2, RPA1]	0	100	0	100	[CDKN1A, FHL2, RPA1]
CUSTOM:WP1591_34	Heart development	CUSTOM_wikipathways-20240310-gmt-Homo-sapiens (1).gmt_09.04.2024	0.00185379	0.00411059	0.00309392	0.00309392	[-1]	Group10	8.51064	4	Specific for Cluster #2	[]	[BMP2, GATA4, TBX2, TBX20]	0	100	0	100	[BMP2, GATA4, TBX2, TBX20]
bioplanet_1183	Proteins and DNA sequences in cardicac structures	CUSTOM_BioPlanet-pathway.txt.txt_09.04.2024	0.00330328	0.00623953	0.00309392	0.00309392	[-1]	Group10	11.1111	3	Specific for Cluster #2	[]	[BMP2, GATA4, TBX2]	0	100	0	100	[BMP2, GATA4, TBX2]
bioplanet_1708	Heart development	CUSTOM_BioPlanet-pathway.txt.txt_09.04.2024	0.00144802	0.00351663	0.00309392	0.00309392	[-1]	Group10	9.09091	4	Specific for Cluster #2	[]	[BMP2, GATA4, TBX2, TBX20]	0	100	0	100	[BMP2, GATA4, TBX2, TBX20]
CUSTOM:WP2118_76	Arrhythmogenic right ventricular cardiomyopathy	CUSTOM_wikipathways-20240310-gmt-Homo-sapiens (1).gmt_09.04.2024	0.00151591	0.00351415	3.1714e-06	1.37427e-05	[-1]	Group11	6.66667	5	Specific for Cluster #1	[DSP, GJA1, ITGA9, SGCD, SGCG]	[]	100	0	100	0	[DSP, GJA1, ITGA9, SGCD, SGCG]
KEGG:05410	Hypertrophic cardiomyopathy	KEGG_09.04.2024	0.000851619	0.00241292	3.1714e-06	1.37427e-05	[-1]	Group11	6.06061	6	Specific for Cluster #1	[ACE, ITGA9, SGCD, SGCG, TNNT2]	[TGFB3]	83.3333	16.6667	84.0046	15.9954	[ACE, ITGA9, SGCD, SGCG, TGFB3, TNNT2]
KEGG:05412	Arrhythmogenic right ventricular cardiomyopathy	KEGG_09.04.2024	0.00277253	0.00543842	3.1714e-06	1.37427e-05	[-1]	Group11	5.81395	5	Specific for Cluster #1	[DSP, GJA1, ITGA9, SGCD, SGCG]	[]	100	0	100	0	[DSP, GJA1, ITGA9, SGCD, SGCG]
KEGG:05414	Dilated cardiomyopathy	KEGG_09.04.2024	0.000175564	0.00099486	3.1714e-06	1.37427e-05	[-1]	Group11	6.66667	7	Specific for Cluster #1	[ADCY1, ITGA9, SGCD, SGCG, TNNT2]	[PLN, TGFB3]	71.4286	28.5714	72.4206	27.5794	[ADCY1, ITGA9, PLN, SGCD, SGCG, TGFB3, TNNT2]
bioplanet_294	Arrhythmogenic right ventricular cardiomyopathy (ARVC)	CUSTOM_BioPlanet-pathway.txt.txt_09.04.2024	0.00151591	0.00351415	3.1714e-06	1.37427e-05	[-1]	Group11	6.66667	5	Specific for Cluster #1	[DSP, GJA1, ITGA9, SGCD, SGCG]	[]	100	0	100	0	[DSP, GJA1, ITGA9, SGCD, SGCG]
bioplanet_295	Dilated cardiomyopathy	CUSTOM_BioPlanet-pathway.txt.txt_09.04.2024	1.61207e-05	0.000164431	3.1714e-06	1.37427e-05	[-1]	Group11	8	8	Specific for Cluster #1	[ACE, ADCY1, ITGA9, SGCD, SGCG, TNNT2]	[PLN, TGFB3]	75	25	75.9099	24.0901	[ACE, ADCY1, ITGA9, PLN, SGCD, SGCG, TGFB3, TNNT2]
R-HSA:1442490	Collagen degradation	REACTOME_Pathways_09.04.2024	0.0057028	0.00969476	0.000324865	0.000527906	[-1]	Group12	6.25	4	Specific for Cluster #1	[COL15A1, COL18A1, COL4A6]	[COL8A1]	75	25	75.9099	24.0901	[COL15A1, COL18A1, COL4A6, COL8A1]
R-HSA:1650814	Collagen biosynthesis and modifying enzymes	REACTOME_Pathways_09.04.2024	0.000911239	0.00244596	0.000324865	0.000527906	[-1]	Group12	7.46269	5	Specific for Cluster #1	[COL15A1, COL18A1, COL4A6]	[COL8A1, PCOLCE]	60	40	61.1732	38.8268	[COL15A1, COL18A1, COL4A6, COL8A1, PCOLCE]
R-HSA:2022090	Assembly of collagen fibrils and other multimeric structures	REACTOME_Pathways_09.04.2024	0.000592366	0.00274643	0.000324865	0.000527906	[-1]	Group12	8.19672	5	Specific for Cluster #1	[COL15A1, COL18A1, COL4A6]	[COL8A1, PCOLCE]	60	40	61.1732	38.8268	[COL15A1, COL18A1, COL4A6, COL8A1, PCOLCE]
R-HSA:8948216	Collagen chain trimerization	REACTOME_Pathways_09.04.2024	0.00144802	0.00351663	0.000324865	0.000527906	[-1]	Group12	9.09091	4	Specific for Cluster #1	[COL15A1, COL18A1, COL4A6]	[COL8A1]	75	25	75.9099	24.0901	[COL15A1, COL18A1, COL4A6, COL8A1]
bioplanet_1295	Beta-1 integrin cell surface interactions	CUSTOM_BioPlanet-pathway.txt.txt_09.04.2024	0.00085083	0.00255249	0.000324865	0.000527906	[-1]	Group12	7.57576	5	Specific for Cluster #1	[COL18A1, COL4A6, ITGA9, NPNT]	[THBS1]	80	20	80.7746	19.2255	[COL18A1, COL4A6, ITGA9, NPNT, THBS1]
bioplanet_769	Collagen biosynthesis and modifying enzymes	CUSTOM_BioPlanet-pathway.txt.txt_09.04.2024	0.00073902	0.00269214	0.000324865	0.000527906	[-1]	Group12	7.8125	5	Specific for Cluster #1	[COL15A1, COL18A1, COL4A6]	[COL8A1, PCOLCE]	60	40	61.1732	38.8268	[COL15A1, COL18A1, COL4A6, COL8A1, PCOLCE]
CUSTOM:HALLMARK_APOPTOSIS_6	HALLMARK_APOPTOSIS	CUSTOM_h.all.v2023.2.Hs.symbols.gmt_09.04.2024	0.000457268	0.00233207	3.62118e-06	1.17688e-05	[-1]	Group13	4.96894	8	Specific for Cluster #2	[]	[BMP2, CDKN1A, DCN, GADD45B, GSN, HMGB2, IRF1, LUM]	0	100	0	100	[BMP2, CDKN1A, DCN, GADD45B, GSN, HMGB2, IRF1, LUM]
CUSTOM:HALLMARK_TNFA_SIGNALING_VIA_NFKB_44	HALLMARK_TNFA_SIGNALING_VIA_NFKB	CUSTOM_h.all.v2023.2.Hs.symbols.gmt_09.04.2024	0.00186202	0.0039568	3.62118e-06	1.17688e-05	[-1]	Group13	4	8	Specific for Cluster #2	[]	[BMP2, CDKN1A, CXCL1, GADD45B, HES1, IRF1, NR4A2, PLK2]	0	100	0	100	[BMP2, CDKN1A, CXCL1, GADD45B, HES1, IRF1, NR4A2, PLK2]
CUSTOM:WP236_100	Adipogenesis	CUSTOM_wikipathways-20240310-gmt-Homo-sapiens (1).gmt_09.04.2024	0.000675689	0.00265078	3.62118e-06	1.17688e-05	[-1]	Group13	5.34351	7	Specific for Cluster #2	[]	[BMP2, CDKN1A, EPAS1, GADD45B, GATA4, LPL, NDN]	0	100	0	100	[BMP2, CDKN1A, EPAS1, GADD45B, GATA4, LPL, NDN]
CUSTOM:WP4879_558	Overlap between signal transduction pathways contributing to LMNA laminopathies	CUSTOM_wikipathways-20240310-gmt-Homo-sapiens (1).gmt_09.04.2024	0.0037657	0.00685895	3.62118e-06	1.17688e-05	[-1]	Group13	7.01754	4	Specific for Cluster #2	[TNFRSF11B]	[BMP2, CDKN1A, HES1]	25	75	25.9325	74.0675	[BMP2, CDKN1A, HES1, TNFRSF11B]
KEGG:05217	Basal cell carcinoma	KEGG_09.04.2024	0.00539256	0.00948348	3.62118e-06	1.17688e-05	[-1]	Group13	6.34921	4	Specific for Cluster #2	[WNT16]	[BMP2, CDKN1A, GADD45B]	25	75	25.9325	74.0675	[BMP2, CDKN1A, GADD45B, WNT16]
bioplanet_1439	ID regulation of gene expression	CUSTOM_BioPlanet-pathway.txt.txt_09.04.2024	2.23448e-06	3.79862e-05	3.62118e-06	1.17688e-05	[-1]	Group13	25	5	Specific for Cluster #2	[SEMA3F]	[CDKN1A, CXCL1, GATA4, THBS1]	20	80	20.7977	79.2023	[CDKN1A, CXCL1, GATA4, SEMA3F, THBS1]
bioplanet_1732	Adipogenesis	CUSTOM_BioPlanet-pathway.txt.txt_09.04.2024	0.000739293	0.0025136	3.62118e-06	1.17688e-05	[-1]	Group13	5.26316	7	Specific for Cluster #2	[]	[BMP2, CDKN1A, EPAS1, GADD45B, GATA4, LPL, NDN]	0	100	0	100	[BMP2, CDKN1A, EPAS1, GADD45B, GATA4, LPL, NDN]
bioplanet_1763	Senescence and autophagy	CUSTOM_BioPlanet-pathway.txt.txt_09.04.2024	0.000121444	0.000774203	3.62118e-06	1.17688e-05	[-1]	Group13	7.07071	7	Specific for Cluster #2	[]	[BMP2, CDKN1A, CXCL1, GSN, IGFBP5, IRF1, THBS1]	0	100	0	100	[BMP2, CDKN1A, CXCL1, GSN, IGFBP5, IRF1, THBS1]

## Sheet: ClueGO Log
Selection Citeria:
Statistical Test Used = Enrichment/Depletion (Two-sided hypergeometric test)
Use pvalue cutoff = true
pvalue cutoff = 0.01
Correction Method Used = Benjamini-Hochberg
Min GO Level = 3
Max GO Level = 8
Cluster #1
Sample File Name = File selection: ManuallyAddedOrModifiedIDs
Number of Genes = 3
Min Percentage = 4.0
Cluster #2
Sample File Name = File selection: ManuallyAddedOrModifiedIDs
Number of Genes = 3
Min Percentage = 4.0
Combine Clusters With 'Or' = true
Percentage for a Cluster to be Specific = 60.0
GO Fusion = false
GO Group = true
Kappa Score Threshold = 0.4
Over View Term = GenePercentInitialList
Group By Kappa Statistics = true
Initial Group Size = 1
Sharing Group Percentage = 50.0
ClueGO Log:
### All results were created with ClueGO v2.5.10 ###
Organism analyzed: Homo Sapiens [9606]
Identifier types used: [SymbolID]
Evidence codes used: [All]
#Genes in CUSTOM_h.all.v2023.2.Hs.symbols.gmt_09.04.2024 : 4382
#Genes in KEGG_09.04.2024 : 8736
#Genes in CUSTOM_wikipathways-20240310-gmt-Homo-sapiens (1).gmt_09.04.2024 : 8421
#Genes in CUSTOM_BioPlanet-pathway.txt.txt_09.04.2024 : 9819
#Genes in REACTOME_Pathways_09.04.2024 : 11091
#All unique genes in selected ontologies: 14836 (reference set for hypergeometric test)
#Genes from Cluster#1: unique uploaded ids 89 -> corresponding genes 88, with 1 (1.12%) missing -> 88 recognized by ClueGO.
#Genes from Cluster#2: unique uploaded ids 103 -> corresponding genes 102, with 1 (0.97%) missing -> 102 recognized by ClueGO.
-> To improve the % of found genes, verify gene identifiers, download new available ClueGO conversion files or add/request additional files.
#Genes with functional annotations in all selected Ontologies from Cluster#1: 76 (86.36%) -> 12 (13.64%) are not functionally annotated in any selected Ontology!
#Genes with functional annotations in all selected Ontologies from Cluster#2: 90 (88.24%) -> 12 (11.76%) are not functionally annotated in any selected Ontology!
#Unique genes with functional annotations in all selected ontologies from the 2 Clusters: 166 (87.37%) -> 24 (12.63%) are not functionally annotated!
-> To improve the % of annotated genes, chose additional ontologies.
#Genes from all Clusters associated to 57 representative Terms and Pathways (after applying general selection criteria): 88 (46.32%)
#Genes from all Clusters associated to 33 representative Terms and Pathways (after p-value significance selection criteria): 76 (40.0%)
KappaScore Grouping:
Iteration: 0 with 16 groups
Iteration: 1 with 15 groups
Iteration: 2 with 14 groups
Final KappaScore groups = 14
# Terms not grouped = 0
# Merge redundant groups with >50.0% overlap
Final group size after merging: 14
#GO All Terms Specific for Cluster #1: 13
#GO All Terms Specific for Cluster #2: 18
#GO All Terms not Specific for a Cluster: 2
#GO Terms: 33
#GO Term Connections: 21
List of missing Genes -> make sure the ids exists or are written propperly -> if yes make sure you have their annotation in ClueGO!
Cluster #1
Gene IDs not found (no annotation or wrong ids) in Cluster#1:
N/A
Cluster #2
Gene IDs not found (no annotation or wrong ids) in Cluster#2:
N/A

## Sheet: MSigDB Hallmark 2020
MOUSE AORTIC SAMPLES, TRANSCRIPTS LDS VSMC2 vs VSMC1
Pct >0.2 in higher expressing sample, Adj P<0.05, Abs FC >1
Table of top 10 significant p-values and q-values for MSigDB Hallmark 2020
term	p-value	q-value	overlap_genes
Epithelial Mesenchymal Transition	8.40133e-08	3e-06	[RGS4, PRRX1, GADD45B, LUM, IGFBP4, CXCL1, PCOLCE, MSX1, THBS1, DCN]
Apoptosis	1.84209e-06	3.3e-05	[BMP2, CDKN1A, GSN, GADD45B, LUM, IRF1, HMGB2, DCN]
TNF-alpha Signaling via NF-kB	9.17406e-06	8.3e-05	[NR4A2, BMP2, CDKN1A, GADD45B, PLK2, IRF1, HES1, CXCL1]
Hypoxia	9.17406e-06	8.3e-05	[CDKN1A, LXN, TGFB3, CITED2, PGAM2, NDRG1, CP, DCN]
Myogenesis	7.93035e-05	0.000571	[PTP4A3, CDKN1A, GSN, GADD45B, PGAM2, SORBS1, CKB]
Adipogenesis	0.000593331	0.003051	[CDKN2C, SNCG, LPL, CD302, APOE, SORBS1]
KRAS Signaling Up	0.000593331	0.003051	[BMP2, PRRX1, CFH, TMEM176B, TMEM176A, GNG11]
Angiogenesis	0.000837052	0.003589	[LUM, LPL, MSX1]
UV Response Dn	0.000897228	0.003589	[RGS4, IGFBP5, CITED2, FHL2, APBB2]
Estrogen Response Early	0.00377324	0.01132	[IGFBP4, ABHD2, ITPK1, FHL2, HES1]
