# Supplementary material for: Intrinsic Gata4 expression sensitizes the aortic root to dilation in a Loeys-Dietz syndrome mouse model
Source: Research Square preprint supplement (doi:10.21203/rs.3.rs-4420617/v1), 2024-06-05
Supplement: Supplementary file 29 [file Supplemental_Table 8.xlsx]

## Sheet: VSMC1.LDSvsVSMC2.LDS.human.diff
Supplemental Table 8.
List of transcripts detected in patient-derived LDS VSMC1 relative to LDS VSMC2. Although all detected transcripts are shown, the following filtering criteria were used to select transcripts for enrichment analysis: Pct >0.2 in higher expressing sample, Adj P<0.05, Abs FC >2.5. Gene enrichment analyses using ClueGo and EnrichR are shown in subsequent tabs.
#gene name	p_val	avg_log2FC	pct.1	pct.2	p_val_adj
PICSAR	1.45e-15	6.43548	0.025	0	3.92e-11
AC074387.1	5.58e-19	6.29565	0.031	0	1.51e-14
AC018742.1	2.98e-76	5.73921	0.13	0.002	8.06e-72
ISM1	1.59e-09	5.72643	0.015	0	4.3e-05
DNER	1.83e-29	5.36037	0.053	0.002	4.96e-25
TMEM92	3.43e-11	5.35558	0.019	0	9.28e-07
BDNF	3.06e-28	5.32548	0.05	0.001	8.28e-24
SFRP1	0	5.24728	0.54	0.04	0
HBB	0.0332289	5.19201	0.007	0.011	1
RPRML	4.22e-40	5.17563	0.073	0.002	1.14e-35
SCGB3A2	7.57e-15	5.17213	0.029	0.002	2.05e-10
SMPX	6.32e-58	5.14626	0.102	0.002	1.71e-53
ARPP21	1.88e-80	5.11806	0.141	0.005	5.09e-76
CST6	3.76e-216	5.08222	0.333	0.016	1.02e-211
RBP4	2.18e-66	5.07649	0.116	0.003	5.9e-62
CATSPERB	1.25e-08	5.05227	0.014	0	0.000337067
PROM1	3.56e-22	4.97904	0.04	0.002	9.64e-18
SCX	0	4.94538	0.508	0.032	0
SLPI	4.8e-06	4.93911	0.018	0.005	0.130025
C1QL3	1.08e-06	4.91316	0.01	0	0.0293124
ST3GAL6-AS1	8.64e-08	4.90916	0.012	0	0.00233841
LEFTY2	3.06e-115	4.89056	0.197	0.009	8.27e-111
LPAR4	9.2e-17	4.85128	0.03	0.001	2.49e-12
PCP4	1.07e-19	4.80226	0.039	0.003	2.89e-15
TMEM132B	1.26e-19	4.77944	0.036	0.002	3.42e-15
LINC02269	3.52e-160	4.77478	0.258	0.01	9.54e-156
NOX4	3.85e-187	4.72731	0.296	0.013	1.04e-182
FAM180A	1.42e-219	4.72213	0.338	0.017	3.85e-215
NCAM1	4.3e-105	4.67799	0.187	0.011	1.16e-100
CLIC3	3.25e-85	4.65462	0.151	0.007	8.81e-81
FAM19A5	2.37e-156	4.6445	0.258	0.013	6.41e-152
PNMA8C	1.75e-42	4.63854	0.079	0.004	4.74e-38
CRISPLD1	0	4.6122	0.669	0.049	0
C1QTNF8	1.22e-13	4.6015	0.024	0.001	3.31e-09
CDH2	0	4.56396	0.499	0.031	0
HAPLN1	2.52e-137	4.54616	0.232	0.012	6.82e-133
C5orf46	2.54e-163	4.52431	0.275	0.019	6.89e-159
AC099066.2	2.9e-09	4.50545	0.015	0	7.85e-05
NKX2-5	1.33e-13	4.50453	0.023	0	3.61e-09
IL31RA	5e-30	4.46407	0.056	0.003	1.35e-25
GAD1	1.04e-10	4.45182	0.019	0.001	2.82e-06
COL8A1	0	4.44237	0.702	0.078	0
TCAP	9.84e-87	4.44079	0.16	0.011	2.66e-82
GALNTL6	6.09e-07	4.43683	0.011	0	0.0164879
ATRNL1	1.76e-170	4.43282	0.281	0.016	4.77e-166
DOK7	1.1e-37	4.42543	0.07	0.003	2.98e-33
PCDH11X	1.32e-120	4.42511	0.212	0.013	3.58e-116
MTUS2	1.76e-207	4.42225	0.327	0.019	4.76e-203
PAK5	5.31e-18	4.41816	0.031	0.001	1.44e-13
GSG1L	8.68e-142	4.40111	0.241	0.014	2.35e-137
DMKN	9.77e-250	4.39579	0.375	0.021	2.65e-245
CYTL1	3.08e-146	4.37997	0.291	0.048	8.34e-142
GRIA2	0	4.35708	0.465	0.029	0
B3GNT7	9.48e-34	4.34648	0.063	0.003	2.57e-29
DSC3	1.8e-32	4.34406	0.059	0.002	4.87e-28
XG	2.6e-44	4.33575	0.087	0.007	7.03e-40
SUGCT	0	4.32638	0.626	0.06	0
FGL2	0	4.31272	0.913	0.135	0
SOST	3.5e-137	4.31026	0.239	0.016	9.48e-133
MSMP	1.72e-09	4.30851	0.015	0	4.65e-05
GALNT5	8.21e-53	4.2876	0.102	0.007	2.22e-48
MYOC	1.04e-35	4.2862	0.073	0.007	2.81e-31
VCAN	0	4.27122	0.856	0.178	0
SPINT2	0	4.24561	0.878	0.133	0
FBLN5	0	4.24551	0.838	0.102	0
AP000802.1	6.07e-08	4.23975	0.013	0	0.00164348
LDLRAD4-AS1	4.02e-07	4.21946	0.011	0	0.0108756
RTN1	0	4.20758	0.535	0.045	0
PCDH11Y	4.78e-42	4.1952	0.079	0.004	1.3e-37
CLMP	0	4.18611	0.493	0.035	0
GLRB	2.93e-81	4.1835	0.149	0.009	7.92e-77
SAMMSON	1.01e-39	4.18298	0.077	0.005	2.73e-35
GRIA1	8.71e-78	4.1749	0.147	0.01	2.36e-73
HRH1	1.4e-87	4.17235	0.16	0.009	3.79e-83
GCNT1	1.54e-12	4.1635	0.023	0.002	4.17e-08
SLC25A34-AS1	2.79e-134	4.15117	0.234	0.016	7.55e-130
GALNT8	9.34e-08	4.14564	0.013	0.001	0.00252966
FAM133A	3.95e-51	4.14545	0.095	0.004	1.07e-46
ST6GALNAC5	1.23e-19	4.1426	0.038	0.003	3.34e-15
MFAP2	7.66e-133	4.14208	0.233	0.016	2.07e-128
UNC5B-AS1	3.61e-34	4.14083	0.065	0.004	9.78e-30
MAB21L2	4.49e-07	4.13882	0.011	0	0.0121552
MYOZ2	5.61e-164	4.13767	0.284	0.025	1.52e-159
FIBIN	0	4.13433	0.743	0.092	0
GPR37	1.14e-08	4.1296	0.014	0	0.000308184
GJA1	0	4.12107	0.656	0.067	0
TCEAL6	6.15e-42	4.10303	0.08	0.005	1.66e-37
AL590004.4	6.34e-20	4.07903	0.038	0.002	1.72e-15
ITGBL1	0	4.06931	0.688	0.076	0
FAP	4.02e-104	4.06157	0.185	0.01	1.09e-99
IGFBPL1	1.18e-41	4.06018	0.077	0.003	3.19e-37
PSTPIP1	3.07e-41	4.04924	0.079	0.004	8.32e-37
OCIAD2	2.56e-298	4.04405	0.436	0.032	6.93e-294
MGAT4C	4.37e-26	4.03472	0.051	0.004	1.18e-21
ARNTL2	4.35e-26	4.02413	0.05	0.003	1.18e-21
NSUN7	9.06e-70	4.01903	0.131	0.008	2.45e-65
ANXA3	1.38e-119	4.01472	0.21	0.012	3.75e-115
SCML2	2.13e-14	4.01196	0.027	0.002	5.78e-10
SPINK1	1.77e-10	4.00199	0.019	0.001	4.79e-06
HMCN1	0	3.99934	0.651	0.071	0
MRAP2	0	3.99245	0.544	0.043	0
GALNT12	2.56e-13	3.98596	0.026	0.002	6.93e-09
SDR42E1	1.42e-09	3.9727	0.017	0.001	3.84e-05
MTTP	3.2e-22	3.96369	0.043	0.003	8.67e-18
GXYLT2	9.17e-189	3.95482	0.315	0.024	2.48e-184
DUSP27	6.8e-60	3.95276	0.109	0.004	1.84e-55
TPH1	2.39e-242	3.94026	0.39	0.039	6.46e-238
PDGFD	4.88e-234	3.92954	0.374	0.032	1.32e-229
PODNL1	8.49e-37	3.92516	0.073	0.006	2.3e-32
PAK3	8.96e-85	3.92129	0.155	0.009	2.43e-80
PCDH7	0	3.92122	0.871	0.103	0
WNT6	0	-10.6264	0	0.217	0
CCL8	0	-8.76686	0.002	0.273	0
AL160272.1	2.94e-08	3.89962	0.013	0	0.000794745
MEGF6	1.84e-92	3.89803	0.174	0.013	4.99e-88
FAM241B	5.3e-101	3.89696	0.182	0.011	1.44e-96
SGCG	2.71e-07	3.8858	0.012	0.001	0.00734092
CACNB4	1.64e-41	3.88259	0.085	0.008	4.43e-37
SLC14A1	3.35e-72	3.88164	0.143	0.013	9.08e-68
PLXNA4	6.46e-38	3.88001	0.073	0.004	1.75e-33
CLEC3A	4.12e-11	3.87629	0.02	0.001	1.12e-06
ARSE	1.61e-10	3.86921	0.018	0.001	4.36e-06
TC2N	0	3.90235	0.503	0.041	0
GAS6-AS1	1.08e-12	3.8488	0.026	0.003	2.92e-08
CARTPT	1.9e-10	3.82005	0.038	0.013	5.13e-06
CHST6	1.09e-15	3.81947	0.031	0.003	2.95e-11
DIAPH3	8.93e-72	3.81078	0.138	0.01	2.42e-67
NALCN	3.73e-45	3.80213	0.087	0.005	1.01e-40
KCNJ3	2.85e-14	3.79891	0.029	0.003	7.71e-10
MYO18B	2.68e-80	3.78924	0.154	0.013	7.26e-76
LRRN1	1.05e-48	3.78778	0.092	0.005	2.84e-44
SCRG1	0	3.85937	0.76	0.093	0
SCG2	5.26e-45	3.77064	0.104	0.016	1.42e-40
GRM7	5.03e-07	3.77021	0.012	0.001	0.0136202
OSR1	3.71e-188	3.78547	0.325	0.032	1.01e-183
RIMS4	1.15e-07	3.76168	0.012	0	0.00311494
AC103740.1	5.43e-06	3.75838	0.011	0.001	0.147056
TBX20	2.21e-08	3.75602	0.014	0.001	0.000598889
PTGER1	0	-8.64673	0.002	0.257	0
TDRKH-AS1	8.39e-08	3.74771	0.012	0	0.002272
SLC24A4	2.96e-55	3.7467	0.111	0.01	8.02e-51
EMB	1.52e-81	3.72916	0.158	0.014	4.11e-77
PDPN	5.13e-23	3.72759	0.044	0.002	1.39e-18
CNTN5	8.62e-07	3.71387	0.011	0.001	0.0233362
B4GALNT3	9.94e-14	3.70913	0.028	0.003	2.69e-09
SCUBE1	1.39e-12	3.70559	0.024	0.002	3.77e-08
OMD	3.42e-296	3.76231	0.46	0.052	9.27e-292
KCTD16	2.9e-14	3.69238	0.029	0.003	7.86e-10
CCL21	0	-8.49873	0.009	0.436	0
AC124312.2	2.22e-06	3.68454	0.012	0.002	0.0600669
TVP23A	7.71e-07	3.67637	0.012	0.001	0.0208808
PLXDC2	0	3.6941	0.737	0.097	0
ACADL	5.5e-195	3.68779	0.331	0.03	1.49e-190
ANO5	7.74e-46	3.65636	0.092	0.007	2.1e-41
KCNK15	4.61e-124	3.6578	0.234	0.024	1.25e-119
KCNB2	1.73e-11	3.6493	0.022	0.002	4.67e-07
LTBP2	0	3.65648	0.697	0.117	0
TNFRSF11B	1.56e-205	3.65585	0.405	0.081	4.22e-201
SEMA3C	3.58e-136	3.64317	0.247	0.022	9.69e-132
MECOM	6.24e-104	3.62476	0.198	0.018	1.69e-99
GALNT17	4.58e-33	3.62453	0.065	0.004	1.24e-28
EXPH5	3.31e-18	3.6234	0.037	0.004	8.96e-14
BASP1	7.23e-225	3.63978	0.366	0.032	1.96e-220
SYT12	3.24e-15	3.62006	0.034	0.004	8.76e-11
PDGFRA	5.21e-263	3.62492	0.421	0.044	1.41e-258
DGKI	5.92e-64	3.61402	0.127	0.011	1.6e-59
ADSSL1	3.36e-125	3.62256	0.24	0.028	9.1e-121
BAALC-AS1	9.98e-17	3.60805	0.03	0.001	2.7e-12
TFPI2	3.98e-117	3.61888	0.226	0.025	1.08e-112
PART1	7.72e-110	3.61114	0.204	0.017	2.09e-105
RGS17	1.68e-80	3.58718	0.158	0.014	4.55e-76
AC108718.1	2.1e-11	3.58578	0.022	0.002	5.68e-07
AC008771.1	1.49e-37	3.58293	0.078	0.007	4.04e-33
SLC10A4	2.03e-24	3.57835	0.048	0.004	5.49e-20
CPXM2	0	3.59844	0.728	0.11	0
GDF10	5.08e-25	3.57129	0.05	0.004	1.37e-20
DOK5	1.24e-41	3.56449	0.085	0.007	3.35e-37
TRIM36	1.52e-117	3.59506	0.218	0.019	4.11e-113
DMRTA1	2.92e-09	3.5333	0.015	0	7.92e-05
MYOT	7.69e-17	3.53032	0.032	0.002	2.08e-12
LIMCH1	0	3.57446	0.808	0.139	0
ADAMTS6	1.04e-76	3.51898	0.162	0.021	2.81e-72
LINC01099	5.58e-07	3.51631	0.011	0	0.015105
PDE3B	4.28e-35	3.50642	0.071	0.006	1.16e-30
KCNQ5	8.06e-37	3.49864	0.07	0.004	2.18e-32
AC092652.2	1.41e-06	3.47266	0.012	0.001	0.0380866
SHC4	5.37e-68	3.46721	0.142	0.016	1.45e-63
LPAR1	6.38e-173	3.53343	0.31	0.034	1.73e-168
SLC41A2	1.11e-171	3.52825	0.302	0.029	3.01e-167
SNAP91	6.31e-09	3.45696	0.015	0.001	0.000170861
SERTAD4-AS1	2.76e-305	3.46495	0.47	0.054	7.46e-301
C2orf88	2.11e-28	3.4545	0.064	0.009	5.72e-24
APOB	7.95e-40	3.4539	0.086	0.01	2.15e-35
KRT17	1.18e-28	3.45234	0.073	0.013	3.19e-24
PCA3	9.06e-25	3.45172	0.059	0.009	2.45e-20
TSLP	2.21e-48	3.43979	0.096	0.008	5.99e-44
FNDC1	7.97e-47	3.43834	0.096	0.009	2.16e-42
MYO5B	1.05e-30	3.43776	0.062	0.005	2.83e-26
ROBO2	1.55e-37	3.4334	0.08	0.009	4.2e-33
RTL3	3.24e-16	3.42927	0.03	0.002	8.78e-12
COX4I2	0	-8.39861	0.005	0.693	0
CTHRC1	0	3.46409	0.64	0.106	0
APCDD1L	8.88e-12	3.41729	0.024	0.002	2.4e-07
PNMA8A	9.81e-58	3.41085	0.123	0.014	2.66e-53
PDE8B	4.32e-126	3.45641	0.246	0.031	1.17e-121
REEP2	1.49e-50	3.40055	0.104	0.01	4.02e-46
MET	5.49e-28	3.39889	0.063	0.008	1.49e-23
SCN9A	1.31e-15	3.39579	0.031	0.003	3.54e-11
SPATA18	3.25e-25	3.39403	0.057	0.008	8.8e-21
NRK	7.62e-57	3.38877	0.115	0.011	2.06e-52
STEAP4	0	-8.3799	0.017	0.673	0
SCG5	1.38e-41	3.37409	0.09	0.01	3.74e-37
AP003548.1	2.08e-67	3.37254	0.134	0.011	5.64e-63
PCLO	6.46e-43	3.37072	0.092	0.01	1.75e-38
HAND2-AS1	2.14e-257	3.41934	0.427	0.054	5.78e-253
KCTD4	1.97e-06	3.36253	0.01	0	0.0534584
MYEF2	0	3.40553	0.536	0.069	0
SPOCK1	4.76e-44	3.35311	0.097	0.012	1.29e-39
PID1	0	3.38832	0.542	0.073	0
KCNK6	3.16e-145	3.36447	0.272	0.031	8.54e-141
THSD4	2.6e-84	3.33907	0.171	0.018	7.05e-80
ALCAM	0	3.35861	0.722	0.129	0
BEX2	1.55e-79	3.33655	0.174	0.026	4.19e-75
ST6GAL2	0	3.35108	0.504	0.068	0
AL117335.1	1.39e-05	3.33354	0.01	0.001	0.377588
GADL1	5.18e-14	3.30673	0.03	0.004	1.4e-09
MGARP	1.23e-37	3.30355	0.079	0.008	3.32e-33
JPH1	4.15e-10	3.2962	0.022	0.003	1.12e-05
STK32A	2.04e-31	3.29467	0.069	0.008	5.53e-27
CDKL2	5.61e-31	3.29121	0.062	0.005	1.52e-26
NRXN1	3.39e-07	3.28906	0.012	0.001	0.00918577
GRIA3	7.72e-15	3.28408	0.028	0.002	2.09e-10
COL8A2	5.5e-139	3.34072	0.256	0.025	1.49e-134
SUSD3	6.37e-22	3.28009	0.048	0.006	1.72e-17
AC112220.2	2.21e-06	3.27907	0.012	0.002	0.0597625
BLID	9.94e-07	3.2752	0.014	0.002	0.0269187
FRMD4B	7.42e-175	3.33795	0.319	0.038	2.01e-170
RCOR2	2.2e-08	3.26415	0.015	0.001	0.000595298
AC073941.1	3.6e-09	3.26307	0.017	0.002	9.75e-05
TSTD1	5.11e-288	3.33638	0.462	0.062	1.38e-283
ERG	1.89e-282	3.28389	0.453	0.052	5.12e-278
HRCT1	4.72e-132	3.27079	0.258	0.033	1.28e-127
SGCD	1.57e-304	3.26163	0.485	0.062	4.24e-300
HSPB7	0	3.25862	0.821	0.195	0
DCHS1	2.01e-49	3.24489	0.109	0.014	5.45e-45
ANGPTL7	1.83e-44	3.23713	0.088	0.007	4.95e-40
TTC9	2.28e-29	3.2367	0.066	0.009	6.17e-25
AC022613.1	8.26e-06	3.23597	0.011	0.001	0.223718
PCOLCE2	4.73e-146	3.25129	0.3	0.051	1.28e-141
TNFRSF10C	1.33e-06	3.2234	0.013	0.002	0.0359633
MFAP5	2.27e-18	3.21664	0.043	0.007	6.15e-14
MROH7	7.73e-06	3.21641	0.012	0.002	0.209148
ADCY2	1.2e-24	3.20542	0.053	0.006	3.24e-20
GABRA4	9.53e-10	3.20406	0.018	0.001	2.58e-05
SIGLEC15	4.62e-06	3.20245	0.01	0.001	0.125086
AC011352.1	4.93e-08	3.19719	0.015	0.002	0.00133374
FZD2	7.8e-65	3.19712	0.135	0.015	2.11e-60
MEG3	5.3e-126	3.25024	0.248	0.031	1.44e-121
ERBB4	1.34e-153	3.24767	0.291	0.035	3.62e-149
KRT7	1.13e-51	3.18971	0.103	0.008	3.05e-47
RHBDL1	2.15e-10	3.18803	0.02	0.002	5.83e-06
TLR2	5.87e-25	3.17921	0.051	0.004	1.59e-20
EPS8L2	9.76e-56	3.17866	0.125	0.018	2.64e-51
COL4A3	2.66e-74	3.1677	0.163	0.023	7.2e-70
RASSF7	6.93e-15	3.16714	0.028	0.002	1.88e-10
AC009041.2	1.45e-32	3.16621	0.072	0.009	3.94e-28
COLEC12	9.12e-71	3.15669	0.152	0.02	2.47e-66
KCNK15-AS1	1.18e-08	3.15043	0.017	0.002	0.000320456
TCEAL2	0	3.23011	0.644	0.098	0
GAP43	2.21e-11	3.14526	0.027	0.005	5.98e-07
ACKR4	8.64e-50	3.13298	0.108	0.013	2.34e-45
MPP6	1.27e-110	3.19668	0.228	0.032	3.45e-106
ZNF365	7.79e-37	3.123	0.073	0.005	2.11e-32
GPLD1	6.72e-47	3.1227	0.107	0.016	1.82e-42
COL4A4	1.15e-96	3.19273	0.2	0.025	3.1e-92
CNTNAP3B	1.97e-22	3.12189	0.06	0.012	5.32e-18
S100A1	6.33e-10	3.11347	0.02	0.002	1.71e-05
PRR15	1.06e-10	3.10735	0.02	0.002	2.88e-06
SLC26A4	1.67e-16	3.09914	0.042	0.008	4.53e-12
AFDN	5.51e-155	3.14623	0.296	0.039	1.49e-150
HTR4	1.96e-06	3.09227	0.012	0.001	0.0530357
TMEM61	2.67e-15	3.0871	0.03	0.002	7.22e-11
AP001065.1	1.33e-06	3.0821	0.013	0.002	0.0361104
AC009549.1	4.63e-35	3.08062	0.071	0.006	1.25e-30
CCDC42	1.52e-16	3.08046	0.03	0.001	4.1e-12
GCNT2	6.68e-36	3.07949	0.08	0.01	1.81e-31
LHFPL1	1.91e-09	3.07622	0.019	0.002	5.18e-05
AKAP5	1.87e-61	3.07592	0.132	0.016	5.06e-57
ADAMTSL1	2.34e-56	3.07268	0.122	0.015	6.33e-52
GAL3ST1	1.87e-13	3.06793	0.029	0.004	5.05e-09
AP002884.1	2.05e-263	3.12667	0.448	0.068	5.54e-259
AC011479.1	4.61e-07	3.06047	0.012	0.001	0.0124894
FHOD3	4.84e-59	3.05988	0.135	0.021	1.31e-54
FAM198B-AS1	4.53e-90	3.05883	0.184	0.022	1.23e-85
DUSP26	6.8e-255	3.12237	0.428	0.055	1.84e-250
LMO7	0	3.0951	0.562	0.083	0
TBXA2R	6.17e-104	3.06746	0.209	0.024	1.67e-99
SEMA3E	2.86e-23	3.05168	0.06	0.011	7.73e-19
SPON1	1.26e-64	3.04743	0.148	0.023	3.42e-60
CA9	7.74e-10	3.04437	0.021	0.003	2.1e-05
MMP2	2.2e-206	3.05646	0.388	0.064	5.95e-202
MYBL1	2.01e-87	3.03202	0.193	0.03	5.43e-83
DLGAP1	5.89e-31	3.03194	0.061	0.004	1.59e-26
GOLGA6L7	2.3e-13	3.02441	0.031	0.005	6.24e-09
SEMA3D	1.49e-97	3.05337	0.21	0.031	4.04e-93
CMYA5	2.08e-35	3.02144	0.081	0.011	5.64e-31
NPTX2	2.7e-104	3.05252	0.208	0.023	7.32e-100
AC124798.1	1.77e-05	3.01762	0.011	0.002	0.478162
ADAMTS7	3.04e-19	3.01388	0.042	0.005	8.24e-15
WISP2	1.3e-249	3.04305	0.483	0.115	3.52e-245
SPINK2	3.84e-08	3.00671	0.019	0.003	0.00103817
TXLNB	8.39e-25	2.99956	0.054	0.006	2.27e-20
ADRA2A	0	-8.22304	0.002	0.379	0
PTGIS	0	3.02318	0.654	0.099	0
AP004609.1	1e-09	2.99042	0.019	0.002	2.71e-05
TPD52	1.35e-46	2.97351	0.107	0.016	3.65e-42
NPR1	8.34e-252	3.01981	0.442	0.071	2.26e-247
SERTAD4	3.41e-82	2.96138	0.181	0.027	9.24e-78
PDZK1IP1	2.96e-16	2.96103	0.035	0.004	8.02e-12
KLHL4	7.68e-06	2.95316	0.011	0.002	0.207974
ST3GAL6	1.15e-43	2.95256	0.102	0.016	3.1e-39
PTHLH	1.26e-25	2.94914	0.057	0.007	3.41e-21
WSCD2	2.9e-13	2.94886	0.027	0.003	7.85e-09
ITGA10	8.12e-226	3.01203	0.421	0.075	2.2e-221
FMN1	1.08e-09	2.94399	0.022	0.004	2.93e-05
CCL19	0	-8.22227	0.013	0.372	0
SNAP25	7.01e-38	2.93513	0.082	0.009	1.9e-33
PROSER2	7.43e-13	2.9338	0.027	0.003	2.01e-08
AC090568.2	8.39e-06	2.92752	0.011	0.001	0.227137
ADAM23	1.25e-27	2.92665	0.061	0.007	3.39e-23
TCTEX1D4	4.48e-06	2.92629	0.011	0.001	0.121193
STK32B	3.76e-10	2.91491	0.021	0.002	1.02e-05
FNDC5	1.38e-52	2.9116	0.116	0.015	3.74e-48
ABCC3	5.56e-37	2.91103	0.082	0.01	1.51e-32
CNTN3	3.16e-84	2.9101	0.197	0.035	8.56e-80
ANOS1	1.02e-41	2.90834	0.1	0.016	2.75e-37
AL118508.1	3.99e-05	2.90795	0.01	0.002	1
VCAN-AS1	1.04e-08	2.90736	0.017	0.002	0.000282318
ZNF185	1.94e-22	2.8925	0.053	0.008	5.26e-18
SLC24A5	3.96e-22	2.89246	0.049	0.006	1.07e-17
AL133342.1	2.2e-12	2.8915	0.028	0.004	5.95e-08
SAMD5	8.88e-07	2.88822	0.015	0.003	0.0240343
CASQ1	1.11e-06	2.88274	0.014	0.002	0.0300821
HRASLS	4.59e-07	2.88179	0.013	0.001	0.0124187
EREG	1.16e-05	2.87749	0.011	0.002	0.315346
DANT2	1.36e-14	2.86885	0.037	0.007	3.67e-10
FAM160A1	8.51e-07	2.86795	0.012	0.001	0.0230261
HAND2	0	2.99642	0.585	0.11	0
MCOLN3	6.21e-18	2.84155	0.042	0.007	1.68e-13
RYR3	3.45e-25	2.83932	0.06	0.009	9.34e-21
MRC2	9.86e-154	2.97114	0.301	0.042	2.67e-149
AC024901.1	6.43e-25	2.83155	0.062	0.011	1.74e-20
RAB17	3.11e-06	2.82261	0.012	0.002	0.0841713
NPM2	9.59e-08	2.81964	0.016	0.002	0.00259569
THBS2	0	2.94764	0.641	0.147	0
HOGA1	1.13e-06	2.803	0.014	0.002	0.030604
BTC	1.75e-143	2.94175	0.295	0.049	4.75e-139
AL365356.5	1.67e-06	2.79726	0.013	0.002	0.0450732
KIAA1211	1.63e-05	2.79711	0.013	0.003	0.441074
MEG8	9.53e-20	2.79411	0.054	0.011	2.58e-15
STAC2	7.35e-27	2.79345	0.06	0.008	1.99e-22
FAM198B	0	2.86068	0.685	0.135	0
CA3	2.64e-13	2.7885	0.028	0.003	7.15e-09
HPSE2	3.63e-59	2.78365	0.13	0.017	9.84e-55
COL9A2	2.35e-59	2.78224	0.143	0.025	6.37e-55
MCF2	5.62e-14	2.77616	0.027	0.002	1.52e-09
CDH13	0	2.83778	0.663	0.149	0
DIRAS3	3.97e-44	2.77353	0.1	0.014	1.07e-39
DCDC2C	1.59e-05	2.76221	0.011	0.002	0.430647
PEBP4	8.59e-67	2.7569	0.156	0.026	2.32e-62
AC055874.1	9.73e-15	2.74795	0.028	0.002	2.63e-10
SHTN1	4.73e-96	2.80929	0.22	0.038	1.28e-91
FABP4	0	-8.17461	0.024	0.839	0
FAM19A2	1.87e-43	2.7437	0.098	0.013	5.05e-39
SLC16A10	3.8e-09	2.74292	0.018	0.002	0.000102849
SLC22A3	0	2.80104	0.576	0.116	0
LOX	1.74e-78	2.74233	0.183	0.031	4.71e-74
FAM162B	0	-8.03604	0.004	0.561	0
SUCNR1	0	-8.03526	0.002	0.225	0
PLEKHB1	1.08e-17	2.7371	0.043	0.007	2.93e-13
CYSLTR1	7.97e-49	2.73281	0.118	0.02	2.16e-44
CHAC1	1.49e-12	2.72635	0.027	0.003	4.03e-08
MKX-AS1	1.13e-07	2.72172	0.015	0.002	0.00305046
ITGA11	1.55e-301	2.79078	0.545	0.121	4.2e-297
TMEM144	5.97e-65	2.71361	0.15	0.023	1.62e-60
GAS6-DT	2.61e-34	2.71089	0.076	0.009	7.06e-30
NUPR2	3.99e-53	2.70762	0.123	0.018	1.08e-48
APLP1	5.79e-30	2.70594	0.071	0.011	1.57e-25
ZNF385D	0	2.7753	0.668	0.146	0
SLC6A6	2.97e-24	2.68644	0.056	0.008	8.05e-20
CNKSR3	8.4e-68	2.68585	0.169	0.033	2.27e-63
AC110597.3	4e-05	2.68508	0.011	0.002	1
COLCA1	2.31e-21	2.68158	0.047	0.006	6.25e-17
TSPAN2	0	2.74569	0.596	0.118	0
TENM4	4e-11	2.67899	0.024	0.003	1.08e-06
MIR210HG	3.02e-27	2.67755	0.067	0.011	8.17e-23
MMP16	8.84e-44	2.67081	0.106	0.018	2.39e-39
RASD1	0	-7.9	0.015	0.601	0
CPAMD8	3.18e-21	2.6684	0.049	0.007	8.62e-17
PPP1R13L	3.28e-79	2.66796	0.191	0.036	8.88e-75
APOE	0	-7.84982	0.038	0.689	0
IL6	0	-7.79458	0.005	0.224	0
TCEAL5	6.99e-58	2.65866	0.135	0.021	1.89e-53
CD36	0	-7.61118	0.009	0.473	0
TLN2	7.42e-140	2.74264	0.306	0.058	2.01e-135
LINC01615	3.26e-75	2.65143	0.176	0.03	8.83e-71
HECW2	2.59e-38	2.64869	0.091	0.014	7e-34
SLC47A1	5.39e-16	2.6483	0.039	0.007	1.46e-11
TYRP1	2.43e-08	2.64013	0.017	0.002	0.000657598
TMEM176A	0	-7.6052	0.006	0.434	0
FGFRL1	1.93e-59	2.63577	0.145	0.026	5.22e-55
AC110048.2	1.99e-05	2.63501	0.011	0.002	0.539617
TMEM191B	2.32e-17	2.62463	0.041	0.006	6.28e-13
AL160153.1	1.47e-07	2.62194	0.014	0.001	0.00396825
DSC2	6.31e-06	2.61893	0.014	0.003	0.170867
KLHL35	1.03e-36	2.61855	0.089	0.014	2.79e-32
COLCA2	9.05e-12	2.61228	0.027	0.004	2.45e-07
AL136088.1	3.03e-11	2.61164	0.026	0.004	8.21e-07
GRB14	4.53e-08	2.60973	0.02	0.004	0.00122589
AL137145.2	2.94e-09	2.60798	0.018	0.002	7.95e-05
PNCK	1.02e-11	2.60588	0.027	0.004	2.77e-07
CYGB	0	-7.52082	0.004	0.331	0
NCKAP5	0	-7.48028	0.003	0.42	0
ALDH1B1	1.87e-291	2.72012	0.521	0.113	5.07e-287
ATP6V1C2	4.6e-10	2.59387	0.026	0.005	1.25e-05
ADAMTS4	0	-7.4415	0.008	0.523	0
FOXP2	5.05e-37	2.58779	0.09	0.015	1.37e-32
MMP23B	1.43e-75	2.58743	0.198	0.045	3.88e-71
AC080038.1	1e-16	2.5869	0.039	0.006	2.72e-12
HTR2A	1.19e-26	2.58657	0.063	0.009	3.23e-22
ARHGEF28	5.22e-74	2.58073	0.179	0.033	1.41e-69
STEAP1	2.58e-22	2.57686	0.053	0.008	6.98e-18
ARMH4	6.71e-74	2.57609	0.191	0.042	1.82e-69
AL591501.1	2.18e-05	2.57562	0.011	0.002	0.58985
NRXN3	1.48e-27	2.57541	0.077	0.017	4e-23
MOV10L1	1.82e-05	2.57348	0.013	0.003	0.493873
PRUNE2	0	2.70353	0.749	0.176	0
TMEM130	1.69e-53	2.5722	0.129	0.022	4.57e-49
BMPR1B	3.05e-57	2.57211	0.148	0.029	8.25e-53
IFITM10	3.09e-09	2.56923	0.023	0.005	8.37e-05
UCHL1	6.04e-105	2.67917	0.265	0.064	1.64e-100
TLR4	7.87e-42	2.56788	0.109	0.021	2.13e-37
CNGA1	0	-7.41433	0.003	0.21	0
SAMD12	3.45e-22	2.56519	0.051	0.007	9.33e-18
ZDHHC23	3.8e-11	2.56509	0.028	0.006	1.03e-06
AC003975.1	3.92e-10	2.56035	0.021	0.002	1.06e-05
NEGR1	2.84e-82	2.5576	0.199	0.038	7.69e-78
CHRDL1	0	-7.28083	0.004	0.314	0
LDHD	8.93e-13	2.55237	0.034	0.007	2.42e-08
ATP6AP1L	3.05e-95	2.66743	0.214	0.035	8.24e-91
AC008011.2	9.55e-08	2.54833	0.013	0.001	0.00258622
TMEM176B	0	-7.24219	0.007	0.458	0
LMO7-AS1	5.83e-24	2.54433	0.06	0.01	1.58e-19
DPT	7.81e-60	2.54158	0.159	0.034	2.11e-55
PLCD3	4.58e-72	2.5408	0.178	0.034	1.24e-67
EFNA5	7.35e-50	2.54017	0.117	0.018	1.99e-45
SLC16A3	4.39e-45	2.5369	0.114	0.021	1.19e-40
UNC13C	5.85e-46	2.53088	0.112	0.019	1.58e-41
LINC01018	1.46e-07	2.52981	0.014	0.001	0.00395013
SCN4B	0	-7.17582	0.003	0.331	0
SLC2A12	1.47e-26	2.52771	0.074	0.016	3.97e-22
COX6A2	7.11e-23	2.52607	0.058	0.01	1.92e-18
ADAMTS5	0	-7.1517	0.003	0.22	0
GPRC5D-AS1	1.2e-20	2.51887	0.051	0.009	3.24e-16
RIPK4	2.31e-08	2.50869	0.017	0.002	0.000624657
CERNA1	3.1e-08	2.50728	0.021	0.004	0.000840284
IL13RA2	1.8e-86	2.65431	0.228	0.057	4.88e-82
ADGRF5	0	-7.0993	0.008	0.512	0
LINC00982	5.27e-150	2.60387	0.33	0.067	1.43e-145
UST	3.63e-22	2.50317	0.052	0.008	9.83e-18
AC105383.1	6.92e-22	2.50248	0.052	0.008	1.87e-17
CPNE4	6.18e-07	2.50167	0.014	0.002	0.016741
NRCAM	2.14e-09	2.49972	0.019	0.002	5.8e-05
TM6SF1	3.22e-14	2.49841	0.035	0.006	8.73e-10
AC004542.2	0.00174793	2.49277	0.011	0.004	1
NAV2-AS3	6.3e-21	2.49268	0.057	0.012	1.7e-16
RAI14	3.64e-196	2.49222	0.431	0.109	9.87e-192
MIR155HG	2.75e-16	2.49013	0.036	0.004	7.44e-12
AC022893.2	4.05e-05	2.48992	0.01	0.002	1
AC007249.2	0.000132212	2.48937	0.011	0.003	1
ITGA9	1.15e-95	2.48197	0.231	0.046	3.12e-91
ADAMTSL3	7.6e-140	2.48132	0.307	0.058	2.06e-135
DOCK5	9.37e-130	2.48088	0.317	0.076	2.54e-125
C14orf132	7.81e-131	2.47667	0.302	0.063	2.11e-126
SLC35F2	1.56e-39	2.47558	0.098	0.017	4.21e-35
PTPN20	4.95e-28	2.47002	0.07	0.012	1.34e-23
S100A16	1.7e-224	2.46909	0.456	0.103	4.61e-220
ALPK3	1.89e-107	2.46104	0.26	0.055	5.11e-103
ABCB4	4.25e-16	2.46067	0.039	0.007	1.15e-11
PLEKHA7	0.000679497	2.45812	0.01	0.003	1
SNCA	0.00011893	2.45347	0.011	0.003	1
GPAT3	1.08e-05	2.4525	0.012	0.002	0.293675
JAKMIP2	2.7e-08	2.44863	0.02	0.004	0.000731967
CYP4F11	9.65e-08	2.44831	0.018	0.003	0.00261224
FAM83G	5.5e-07	2.4471	0.015	0.002	0.0148951
KRT19	5.18e-42	2.4455	0.084	0.007	1.4e-37
KCNMA1-AS1	8.17e-07	2.44416	0.013	0.002	0.0221089
SH3RF2	5.46e-08	2.44216	0.02	0.004	0.00147716
JAM2	2.46e-43	2.44176	0.115	0.023	6.66e-39
COL10A1	3.92e-06	2.43539	0.015	0.003	0.106243
DHCR24	3.19e-17	2.43509	0.05	0.012	8.64e-13
SOX8	3.68e-07	2.4333	0.019	0.004	0.00995833
INKA1	2.38e-65	2.42073	0.165	0.033	6.45e-61
PRDM6	3.23e-146	2.4202	0.322	0.063	8.75e-142
UNC5B	1.87e-26	2.4155	0.073	0.016	5.07e-22
SPRED3	4.45e-09	2.41032	0.023	0.005	0.000120391
MXRA5	9.04e-10	2.41005	0.031	0.009	2.45e-05
AC104031.1	2.02e-07	2.40259	0.016	0.002	0.00548141
BHMT2	8.54e-56	2.4016	0.142	0.027	2.31e-51
HIST1H2AE	2.16e-11	2.39993	0.028	0.005	5.86e-07
SCARA3	5.53e-200	2.39254	0.442	0.114	1.5e-195
PTPRO	8.57e-22	2.39196	0.057	0.011	2.32e-17
AC254633.1	4.91e-05	2.38946	0.011	0.002	1
SLC2A1-AS1	4.93e-16	2.36925	0.04	0.007	1.33e-11
SUSD5	0	2.36328	0.775	0.251	0
FERMT1	2.41e-07	2.36152	0.018	0.004	0.00652163
ACOT11	1.09e-38	2.36127	0.107	0.023	2.94e-34
PRR26	2.06e-17	2.35825	0.044	0.008	5.57e-13
KLHL41	0.00013614	2.35823	0.01	0.002	1
AC011247.1	1.42e-05	2.35534	0.01	0.001	0.383787
PIANP	1.23e-60	2.35087	0.16	0.034	3.33e-56
CDH11	2.49e-121	2.35063	0.331	0.097	6.74e-117
LPCAT2	1.12e-70	2.35033	0.18	0.037	3.04e-66
NLGN4Y	3.5e-28	2.33189	0.07	0.012	9.47e-24
TMEM238	3.82e-30	2.3295	0.081	0.016	1.03e-25
EHD4	3.06e-104	2.32893	0.268	0.064	8.28e-100
SERPINE1	1.02e-197	2.32598	0.503	0.173	2.76e-193
HCCAT5	2.03e-09	2.31578	0.021	0.003	5.49e-05
AC010997.5	3.4e-10	2.31057	0.025	0.005	9.2e-06
SYNDIG1	2.75e-10	2.30947	0.026	0.005	7.44e-06
MYRFL	7.28e-11	2.30498	0.024	0.004	1.97e-06
ETV4	2.4e-05	2.29151	0.01	0.001	0.651022
GMPR	8.93e-140	2.29123	0.336	0.082	2.42e-135
GGN	8.17e-05	2.29018	0.01	0.002	1
PLD5	1.09e-87	2.28912	0.224	0.049	2.95e-83
APLN	1.38e-11	2.28631	0.028	0.005	3.73e-07
PWAR6	7.28e-80	2.28101	0.228	0.061	1.97e-75
SHROOM3	1.23e-143	2.28033	0.344	0.082	3.33e-139
HPD	1.6e-14	2.27852	0.036	0.007	4.34e-10
ENO3	4.98e-07	2.27425	0.019	0.005	0.0134879
PRR7	1.57e-14	2.27281	0.043	0.011	4.25e-10
ALDH1L1	2.39e-27	2.26835	0.076	0.017	6.48e-23
DMTN	1.82e-91	2.2667	0.22	0.042	4.91e-87
KCNMA1	0	2.26059	0.751	0.205	0
IL11RA	2.73e-132	2.25965	0.323	0.078	7.38e-128
ARMC9	2.2e-48	2.25921	0.145	0.037	5.95e-44
RAVER2	4.63e-76	2.2561	0.207	0.049	1.25e-71
KRT86	1.14e-06	2.25405	0.014	0.002	0.0307952
KCNK1	9.33e-09	2.25292	0.02	0.004	0.000252664
MAOB	7.84e-172	2.2525	0.389	0.092	2.12e-167
MKX	1.05e-30	2.25077	0.085	0.018	2.84e-26
VAT1L	1.58e-41	2.25015	0.102	0.017	4.27e-37
ITM2A	1.76e-59	2.24494	0.146	0.026	4.77e-55
AC068580.4	1.73e-07	2.24406	0.025	0.008	0.00467557
AL136084.3	3.68e-15	2.24356	0.04	0.008	9.97e-11
INE2	0.000474491	2.24328	0.01	0.003	1
ANKRD6	6.55e-73	2.24267	0.213	0.057	1.77e-68
SFRP4	4.19e-127	2.24193	0.344	0.101	1.13e-122
FGD6	2.84e-34	2.24168	0.103	0.026	7.68e-30
AL133410.1	1.48e-05	2.24166	0.015	0.004	0.401323
SNCAIP	2.47e-50	2.24099	0.145	0.035	6.7e-46
EPPK1	7.88e-07	2.24002	0.018	0.004	0.0213412
LINC00844	2.9e-31	2.23072	0.092	0.022	7.85e-27
SLC26A4-AS1	0.000120014	2.22669	0.011	0.003	1
ACOT1	3.41e-06	2.22093	0.016	0.004	0.0923549
SVIL	0	2.21334	0.948	0.424	0
KCNS3	3.32e-42	2.21119	0.121	0.029	8.98e-38
AC005165.1	2.31e-07	2.21111	0.019	0.004	0.00623999
ACTC1	3.59e-221	2.20773	0.481	0.131	9.71e-217
RGS3	7.58e-185	2.20314	0.421	0.107	2.05e-180
GDF6	3.52e-06	2.20196	0.02	0.007	0.0953071
ANKH	7.86e-185	2.19994	0.431	0.117	2.13e-180
ITGB1BP2	1.83e-18	2.19368	0.052	0.011	4.96e-14
BBOX1	5.23e-08	2.19331	0.018	0.003	0.00141672
AKR1C1	2.5e-81	2.19329	0.234	0.065	6.77e-77
MYO1D	0	2.1922	0.733	0.298	0
SRRM4	6.76e-18	2.19184	0.051	0.011	1.83e-13
HIP1R	3.61e-21	2.19011	0.064	0.016	9.77e-17
PGM2L1	2.78e-91	2.19002	0.252	0.066	7.52e-87
PRELP	0	2.18272	0.901	0.539	0
FBXO2	1.95e-29	2.18223	0.084	0.019	5.28e-25
LINC01106	1.07e-18	2.18012	0.046	0.008	2.91e-14
EDA2R	1.07e-14	2.17829	0.048	0.013	2.91e-10
KIAA1755	1.11e-07	2.178	0.024	0.007	0.00299541
FAT3	2.34e-71	2.17746	0.204	0.052	6.33e-67
SIRPA	5.17e-14	2.17477	0.047	0.014	1.4e-09
AC079922.2	3.45e-19	2.1663	0.051	0.01	9.33e-15
AC026801.2	4.94e-08	2.16597	0.02	0.004	0.00133751
SCUBE3	1.74e-102	2.16593	0.286	0.079	4.71e-98
LAMA2	9.08e-78	2.16408	0.215	0.052	2.46e-73
GAS6	0	2.16182	0.918	0.734	0
PQLC2L	8.52e-09	2.16114	0.02	0.003	0.000230742
MFAP4	0	2.15951	0.955	0.497	0
STK38L	0	2.159	0.768	0.35	0
GALNT10	2.44e-36	2.15789	0.118	0.033	6.59e-32
LGR6	3.26e-104	2.15096	0.264	0.058	8.84e-100
AL137145.1	1.79e-05	2.15009	0.015	0.004	0.483838
LRRC3	4.36e-16	2.14579	0.049	0.013	1.18e-11
WSCD1	5.4e-08	2.14538	0.018	0.003	0.00146124
LNX1	2.2e-24	2.14538	0.069	0.015	5.97e-20
CMKLR1	1.32e-54	2.14333	0.157	0.039	3.57e-50
IRAK2	4.33e-07	2.14272	0.021	0.006	0.0117199
PREX1	3.3e-92	2.14232	0.24	0.055	8.94e-88
LOXL4	1.84e-17	2.14138	0.05	0.012	4.99e-13
GABRR1	1.57e-05	2.141	0.014	0.003	0.424591
MTHFS	4.49e-42	2.13742	0.128	0.033	1.21e-37
KALRN	7.18e-244	2.13574	0.572	0.197	1.94e-239
AC016773.1	2.05e-05	2.13511	0.013	0.003	0.555355
P2RY6	1.95e-05	2.13399	0.015	0.004	0.527358
F11R	2.9e-05	2.13293	0.014	0.004	0.786361
BMF	1.51e-05	2.13157	0.018	0.006	0.407669
FAM47E	1.79e-07	2.13152	0.023	0.007	0.00484041
CDO1	4.14e-98	2.12945	0.284	0.084	1.12e-93
CDC42EP3	2.73e-290	2.1263	0.614	0.2	7.39e-286
PPL	1.68e-15	2.12428	0.05	0.014	4.55e-11
TLR1	5.69e-07	2.12248	0.019	0.005	0.0154126
SYNJ2	7.55e-56	2.12246	0.176	0.05	2.04e-51
FZD6	3.16e-78	2.12223	0.223	0.059	8.55e-74
STEAP3	1.87e-14	2.12065	0.043	0.011	5.07e-10
HOXA2	3.61e-05	2.10931	0.017	0.006	0.977846
ELN	2.01e-288	2.10694	0.711	0.335	5.45e-284
DBNDD1	3.58e-08	2.10248	0.024	0.007	0.00096938
ADD3	5.63e-128	2.10243	0.356	0.107	1.52e-123
MICAL2	0	2.10193	0.727	0.28	0
SLCO5A1	8.26e-14	2.10179	0.044	0.012	2.24e-09
GDF7	1.69e-62	2.10042	0.174	0.041	4.57e-58
SPTLC3	1.62e-11	2.09461	0.037	0.011	4.38e-07
NT5E	1.66e-93	2.09356	0.267	0.075	4.49e-89
PDGFC	3.45e-157	2.09341	0.392	0.106	9.35e-153
KBTBD12	3.28e-24	2.09265	0.072	0.018	8.89e-20
JCAD	7.52e-33	2.09244	0.108	0.031	2.04e-28
ENPP2	3.14e-36	2.09227	0.11	0.028	8.49e-32
GCHFR	4.68e-37	2.08693	0.099	0.02	1.27e-32
NAV2	3.17e-144	2.08647	0.403	0.131	8.59e-140
VXN	5.78e-07	2.08606	0.017	0.004	0.0156493
ADCY7	6.63e-10	2.08577	0.03	0.008	1.8e-05
PPFIBP1	0	2.0855	0.789	0.361	0
AHNAK2	1.08e-42	2.08397	0.151	0.049	2.93e-38
SHB	2.61e-26	2.07984	0.08	0.02	7.07e-22
SLC2A1	1.13e-39	2.07731	0.112	0.025	3.07e-35
IL17B	2.58e-35	2.07642	0.117	0.034	6.97e-31
DPYSL3	0	2.07209	0.664	0.202	0
ARID3B	8.45e-08	2.07075	0.023	0.007	0.00228762
CCDC8	5.69e-59	2.06954	0.184	0.053	1.54e-54
C19orf33	8.74e-11	2.06925	0.019	0.001	2.37e-06
LOXL1-AS1	9.3e-34	2.06246	0.098	0.023	2.52e-29
AL162586.1	0.00281522	2.06011	0.01	0.004	1
IZUMO4	3.53e-07	2.05166	0.019	0.004	0.00955273
AC092490.1	5.95e-10	2.051	0.02	0.002	1.61e-05
PXDC1	0	2.05031	0.674	0.279	0
SLFN13	3.6e-20	2.04967	0.075	0.025	9.75e-16
SSX2IP	2.1e-49	2.04922	0.146	0.037	5.67e-45
TES	0	2.04835	0.633	0.197	0
AP000808.1	3.57e-10	2.04558	0.027	0.006	9.66e-06
ABLIM1	1.7e-56	2.04373	0.174	0.048	4.6e-52
GULP1	5.89e-297	2.04346	0.63	0.219	1.6e-292
TMEM178A	4.93e-11	2.04062	0.035	0.01	1.33e-06
PDE4D	9.82e-89	2.04007	0.256	0.07	2.66e-84
NXPH3	8.48e-126	2.03689	0.346	0.102	2.3e-121
LDLRAD4	5.4e-93	2.03179	0.279	0.083	1.46e-88
ATAD3C	2.58e-10	2.03051	0.033	0.01	6.99e-06
SLC7A1	8.05e-25	2.02973	0.074	0.018	2.18e-20
AC099791.2	4.42e-28	2.02618	0.078	0.017	1.2e-23
AC006059.1	1.43e-10	2.02316	0.033	0.009	3.88e-06
FAM110C	3.62e-11	2.02241	0.03	0.007	9.8e-07
PTGS1	9.03e-08	2.01784	0.017	0.003	0.00244565
KIAA0895	4.98e-14	2.01754	0.048	0.014	1.35e-09
FBXL2	1.56e-53	2.0113	0.153	0.037	4.23e-49
SULF1	6.07e-216	2.01003	0.562	0.213	1.64e-211
GPT2	5.65e-05	2.00636	0.018	0.007	1
PRSS23	8.29e-292	2.00466	0.648	0.249	2.24e-287
P2RY2	0.000432144	2.00409	0.01	0.003	1
GNG8	3.42e-05	1.99828	0.013	0.003	0.924811
PLS1	1.08e-05	1.99825	0.015	0.004	0.291812
AP000317.1	1.68e-07	1.99419	0.017	0.003	0.00454503
LINC00278	5.9e-05	1.99233	0.011	0.002	1
COL15A1	7.04e-85	1.99124	0.229	0.054	1.91e-80
GALNT2	6.58e-184	1.99063	0.477	0.161	1.78e-179
TDRKH	8.47e-08	1.98932	0.022	0.006	0.00229312
SPAG1	2.39e-34	1.98595	0.119	0.036	6.47e-30
CCDC136	1.48e-18	1.9856	0.064	0.019	4e-14
C3orf52	1.55e-12	1.98532	0.029	0.004	4.21e-08
AC141928.1	4.86e-18	1.98472	0.048	0.009	1.32e-13
PHKA1	4.27e-18	1.98381	0.06	0.017	1.16e-13
AL355974.2	3.81e-45	1.97895	0.136	0.034	1.03e-40
HTR1B	1.62e-05	1.97473	0.018	0.006	0.439126
PHTF2	1.68e-140	1.97231	0.408	0.143	4.55e-136
TRIM59	7.01e-10	1.97073	0.029	0.007	1.9e-05
WISP1	1.07e-21	1.97045	0.069	0.018	2.89e-17
AC092171.4	1.03e-08	1.96765	0.025	0.007	0.000279127
AVEN	1.31e-112	1.96448	0.326	0.101	3.53e-108
AC098829.1	1.99e-21	1.9635	0.079	0.026	5.38e-17
ADAMTSL5	4e-17	1.96338	0.059	0.018	1.08e-12
PHACTR1	1.47e-81	1.96331	0.241	0.067	3.99e-77
SLC12A6	5.37e-60	1.96165	0.215	0.075	1.45e-55
LINC01515	2.47e-10	1.95605	0.028	0.007	6.7e-06
FAM169A	0.000713406	1.95545	0.01	0.003	1
AC004130.1	6.91e-10	1.95293	0.031	0.009	1.87e-05
EPHA4	2.89e-59	1.95249	0.188	0.054	7.82e-55
AC110597.1	0.000325064	1.95229	0.011	0.003	1
SGCA	0	1.95129	0.76	0.331	0
NEO1	4.98e-118	1.95122	0.351	0.117	1.35e-113
SCD	2.51e-09	1.94899	0.027	0.007	6.79e-05
TEC	3.45e-15	1.94489	0.042	0.009	9.33e-11
AC010331.1	3.26e-06	1.94426	0.019	0.006	0.0881551
FMOD	6.68e-256	1.94402	0.654	0.316	1.81e-251
CDH8	7.52e-07	1.94332	0.026	0.009	0.0203593
MIR193BHG	8.05e-37	1.93963	0.118	0.032	2.18e-32
TMEM44	2.06e-14	1.93857	0.037	0.007	5.58e-10
TMEM45A	7.54e-68	1.93754	0.21	0.06	2.04e-63
NSMF	1.75e-106	1.93718	0.329	0.109	4.73e-102
RBM20	9.97e-45	1.93646	0.15	0.044	2.7e-40
GPC4	3.81e-73	1.9361	0.201	0.047	1.03e-68
LTC4S	5.95e-29	1.93431	0.091	0.024	1.61e-24
SMIM1	3.41e-38	1.93276	0.115	0.029	9.22e-34
SH3GL3	1.76e-07	1.93203	0.014	0.002	0.00475341
ADPRHL1	2.24e-19	1.92892	0.057	0.014	6.05e-15
NPAS2	3.24e-08	1.92762	0.034	0.013	0.000877402
BACH2	8e-20	1.92741	0.074	0.024	2.17e-15
AL008733.1	4.93e-08	1.92482	0.017	0.002	0.00133414
GMDS	2.34e-270	1.92088	0.582	0.174	6.34e-266
ARFGEF3	6.73e-07	1.92085	0.018	0.004	0.0182297
KANK1	3.88e-248	1.91917	0.602	0.226	1.05e-243
TPD52L1	6.41e-87	1.91681	0.233	0.055	1.73e-82
LDOC1	2.44e-288	1.90982	0.645	0.257	6.61e-284
SDK1	1.37e-53	1.90855	0.191	0.063	3.71e-49
CCDC24	7.27e-16	1.90753	0.051	0.014	1.97e-11
ITGB8	8.22e-10	1.90601	0.034	0.011	2.22e-05
PGM1	6.12e-160	1.90509	0.425	0.136	1.66e-155
DAPL1	6.11e-17	1.90291	0.075	0.029	1.65e-12
GREB1L	4.22e-16	1.90143	0.047	0.011	1.14e-11
MEDAG	1.7e-143	1.89879	0.37	0.1	4.61e-139
RHOF	8.43e-08	1.89771	0.027	0.009	0.0022828
STMN1	2.95e-157	1.89347	0.401	0.118	7.98e-153
TMEM217	1.47e-05	1.89144	0.014	0.004	0.39872
ZNRF3-AS1	0.000957528	1.89032	0.011	0.004	1
LY75	5.13e-10	1.89005	0.038	0.013	1.39e-05
NXNL2	1.86e-15	1.8891	0.045	0.011	5.04e-11
RPS6KA2	1.02e-28	1.88904	0.097	0.029	2.77e-24
SLC1A4	5.98e-36	1.88575	0.119	0.034	1.62e-31
MID1	4.66e-23	1.88253	0.089	0.03	1.26e-18
AP002026.1	1e-19	1.88181	0.072	0.023	2.71e-15
CD109	1.34e-106	1.87328	0.336	0.115	3.63e-102
RIN3	1.91e-39	1.87093	0.135	0.041	5.17e-35
FAT4	1.23e-56	1.86936	0.205	0.069	3.34e-52
SLC7A11	0.00151144	1.86389	0.011	0.004	1
SNX25	7.82e-40	1.86207	0.153	0.054	2.12e-35
SAMD4A	1.72e-147	1.86088	0.438	0.16	4.65e-143
LINC01186	3.52e-05	1.85986	0.012	0.002	0.951815
STK26	4.91e-34	1.8595	0.111	0.031	1.33e-29
FAM151B	1.39e-05	1.85807	0.013	0.003	0.376059
ABCC1	6.85e-32	1.85686	0.124	0.043	1.85e-27
NAV2-AS1	1.61e-07	1.85362	0.018	0.004	0.00436242
TSPAN1	2.39e-05	1.85279	0.013	0.003	0.646343
ADAMTS8	7.28e-39	1.85271	0.122	0.032	1.97e-34
TGFBR1	2.92e-112	1.8462	0.383	0.149	7.92e-108
LINC01252	3.61e-09	1.84568	0.031	0.01	9.76e-05
CRNDE	2.16e-188	1.84222	0.503	0.177	5.84e-184
FRZB	0	1.84058	0.929	0.677	0
LRRC1	2.86e-33	1.83714	0.104	0.027	7.73e-29
B4GALT1-AS1	3.27e-19	1.8362	0.065	0.019	8.85e-15
AC040970.1	4.34e-07	1.83607	0.021	0.006	0.0117518
C8orf34	2.62e-19	1.83571	0.062	0.017	7.09e-15
BRCA2	1.45e-16	1.83478	0.068	0.024	3.94e-12
PLOD2	3.63e-100	1.83369	0.338	0.123	9.82e-96
TNFRSF12A	3.2e-295	1.83345	0.712	0.346	8.67e-291
AC239800.3	1.2e-29	1.83128	0.106	0.033	3.26e-25
S100A10	4.7e-278	1.83116	0.736	0.399	1.27e-273
PPP1R3C	1.29e-163	1.82898	0.476	0.178	3.49e-159
HSD17B14	3.07e-27	1.82725	0.096	0.03	8.32e-23
MYL2	0.000193711	1.82457	0.01	0.002	1
AL355974.3	5.36e-05	1.81952	0.011	0.002	1
ENPP1	3.21e-117	1.81754	0.385	0.145	8.69e-113
RHOU	2.23e-110	1.8158	0.317	0.093	6.05e-106
CYS1	4.82e-107	1.81531	0.317	0.095	1.31e-102
HTRA1	0	1.81523	0.857	0.563	0
FGFR2	3.16e-08	1.81457	0.027	0.008	0.000854768
PRELID2	5.97e-26	1.81435	0.103	0.035	1.62e-21
AC015909.2	1.53e-05	1.81272	0.015	0.004	0.414428
COMP	6.46e-11	1.81234	0.048	0.019	1.75e-06
TEX26-AS1	1.41e-06	1.8115	0.019	0.005	0.0381056
MAP3K21	4.71e-06	1.80819	0.013	0.002	0.12747
HTRA3	7.08e-06	1.80713	0.019	0.007	0.191563
FANCC	1.34e-13	1.80646	0.076	0.035	3.64e-09
BNC2	1.23e-10	1.80634	0.037	0.012	3.32e-06
POU6F2	2.85e-11	1.80602	0.032	0.008	7.71e-07
SPATA1	2.15e-08	1.80412	0.033	0.012	0.000582129
STARD4-AS1	4.6e-20	1.80157	0.081	0.029	1.25e-15
LYNX1	2.66e-46	1.79871	0.16	0.049	7.21e-42
TJP2	7.49e-08	1.79871	0.028	0.01	0.00202621
LAYN	8.86e-141	1.79385	0.405	0.135	2.4e-136
FXYD5	8.05e-152	1.79211	0.493	0.228	2.18e-147
PDZRN4	1.72e-54	1.79157	0.165	0.043	4.65e-50
METTL27	1.8e-07	1.7906	0.023	0.007	0.00487763
ROR1	7.97e-49	1.78282	0.181	0.061	2.16e-44
DNASE1L1	3.57e-42	1.7822	0.131	0.034	9.66e-38
AC013271.1	2.92e-16	1.78104	0.065	0.023	7.9e-12
TMEM56	1.57e-97	1.77967	0.315	0.105	4.24e-93
AC023043.1	1.62e-20	1.77782	0.07	0.021	4.39e-16
CYP46A1	1.32e-06	1.77763	0.028	0.011	0.0358562
SLC16A7	1.47e-87	1.77555	0.333	0.136	3.99e-83
PPM1H	4.17e-07	1.77552	0.032	0.013	0.0112752
COPRS	0	1.77013	0.758	0.404	0
TCEA3	2.12e-134	1.77002	0.403	0.139	5.74e-130
B3GALT2	5.63e-05	1.76719	0.012	0.003	1
TNFAIP6	0.000707881	1.76374	0.016	0.007	1
PATJ	1.48e-65	1.76336	0.238	0.084	4.01e-61
SLC5A3	1.41e-116	1.76314	0.357	0.118	3.83e-112
NGEF	0.000960599	1.76287	0.011	0.004	1
AL391422.3	1.53e-25	1.76224	0.095	0.031	4.13e-21
AC103706.1	4.03e-07	1.76158	0.027	0.01	0.0109081
DKK3	0	1.76077	0.903	0.637	0
AC027682.6	1.79e-16	1.76058	0.057	0.017	4.83e-12
RFLNB	2.86e-44	1.76053	0.163	0.054	7.75e-40
SYNPO	2.8e-255	1.76023	0.671	0.319	7.57e-251
PDLIM3	0	1.75692	0.954	0.657	0
GRAMD1C	7.33e-06	1.75578	0.018	0.006	0.198357
SQLE	9.34e-48	1.75397	0.16	0.048	2.53e-43
RAB23	1.11e-144	1.74833	0.443	0.165	3.01e-140
HIBCH	5.06e-146	1.74781	0.456	0.18	1.37e-141
L3MBTL1	3.37e-09	1.74687	0.039	0.015	9.13e-05
IGFBP6	0	1.74467	0.841	0.569	0
RASSF3	5.9e-192	1.74432	0.548	0.228	1.6e-187
ZBED3	7.31e-64	1.74399	0.226	0.075	1.98e-59
JHY	2.19e-16	1.74393	0.062	0.02	5.93e-12
LMO3	1.3e-90	1.7429	0.248	0.06	3.53e-86
SLC24A3	6.99e-29	1.74269	0.102	0.031	1.89e-24
BLNK	0.00174338	1.74267	0.012	0.005	1
CCDC9B	9.64e-28	1.74009	0.089	0.024	2.61e-23
AC093673.1	1.42e-67	1.73788	0.225	0.07	3.85e-63
AC079089.1	2.98e-06	1.73603	0.018	0.005	0.0807302
FRK	5.28e-104	1.73596	0.331	0.11	1.43e-99
HYAL3	0.000263703	1.7314	0.014	0.005	1
ZFY-AS1	4.35e-07	1.72894	0.019	0.004	0.011778
HACD4	3.21e-80	1.72793	0.25	0.074	8.68e-76
KIAA1522	9.88e-10	1.72634	0.043	0.017	2.68e-05
RIMS1	1.89e-11	1.72612	0.028	0.005	5.11e-07
GLIPR1	0	1.72562	0.74	0.353	0
PRRG4	1.13e-19	1.72541	0.048	0.008	3.05e-15
ABRACL	8.65e-49	1.725	0.161	0.047	2.34e-44
ZNF469	0.000570925	1.72056	0.011	0.003	1
LINC02298	8.06e-11	1.7195	0.031	0.007	2.18e-06
NPR3	1.08e-56	1.71647	0.201	0.067	2.92e-52
LANCL3	7.18e-12	1.71419	0.036	0.009	1.94e-07
CCNO	2.98e-05	1.71197	0.011	0.002	0.806088
TMEM237	9.34e-89	1.70948	0.313	0.116	2.53e-84
AL359504.2	6.88e-16	1.70926	0.063	0.022	1.86e-11
LINC01123	2.02e-05	1.70784	0.015	0.004	0.546042
PIK3C2B	4.96e-13	1.70746	0.051	0.018	1.34e-08
AC093390.1	1.44e-50	1.70671	0.146	0.034	3.89e-46
PCNX2	2.88e-15	1.70615	0.057	0.019	7.8e-11
BAMBI	3.5e-29	1.70597	0.107	0.034	9.49e-25
NT5DC3	1.35e-77	1.70537	0.25	0.077	3.65e-73
EFNB2	1.03e-65	1.70518	0.206	0.058	2.79e-61
ARHGEF26	1.2e-88	1.70079	0.301	0.104	3.24e-84
LOXL1	7.25e-119	1.69914	0.403	0.16	1.96e-114
DSEL	1.16e-128	1.69599	0.423	0.168	3.14e-124
ADRA2C	1.9e-94	1.69525	0.336	0.13	5.15e-90
CD160	0.000437332	1.69429	0.014	0.005	1
MAN2A1	3.57e-96	1.69341	0.366	0.154	9.65e-92
EXT1	8.21e-158	1.69097	0.52	0.231	2.22e-153
PPP1R3B	2.12e-94	1.69094	0.32	0.113	5.75e-90
STAC	1.71e-22	1.68992	0.094	0.034	4.63e-18
MPP7	6.25e-123	1.68873	0.359	0.11	1.69e-118
AC144831.1	9.99e-05	1.68767	0.016	0.006	1
NAP1L3	2.12e-80	1.68758	0.262	0.084	5.74e-76
AC093390.2	5.4e-06	1.68574	0.018	0.005	0.146188
PKD2	3.31e-260	1.68495	0.735	0.409	8.95e-256
NPTXR	3.49e-21	1.68315	0.082	0.027	9.45e-17
CIB2	4.32e-26	1.6815	0.087	0.024	1.17e-21
SH3BGR	4.87e-190	1.68066	0.529	0.198	1.32e-185
TNFRSF10A	0.00174036	1.68011	0.013	0.005	1
AC104825.1	1.05e-10	1.67539	0.048	0.019	2.84e-06
MALRD1	7.94e-07	1.67421	0.021	0.006	0.0214984
AC079610.2	2.3e-07	1.67373	0.021	0.005	0.00622788
MRPS6	2.06e-239	1.67344	0.637	0.292	5.58e-235
CLCN4	3.52e-10	1.67209	0.033	0.009	9.52e-06
SESTD1	7.92e-165	1.67082	0.512	0.212	2.14e-160
KLHL3	2.4e-14	1.67004	0.07	0.029	6.51e-10
HACD1	4.73e-223	1.66743	0.583	0.22	1.28e-218
PFN2	2.64e-264	1.66672	0.664	0.314	7.14e-260
AGFG2	2.45e-13	1.66394	0.047	0.015	6.62e-09
AC139795.3	0.00137974	1.66117	0.011	0.004	1
PDZRN3	3.11e-111	1.65996	0.362	0.126	8.43e-107
POT1-AS1	1.68e-12	1.65956	0.043	0.013	4.55e-08
AJ011932.1	4.77e-25	1.65929	0.083	0.023	1.29e-20
OXTR	1.8e-05	1.65821	0.016	0.005	0.487509
SRPK3	1.37e-30	1.65703	0.101	0.028	3.7e-26
CA5B	2.94e-59	1.65584	0.237	0.091	7.96e-55
CCDC190	8.85e-07	1.65342	0.026	0.01	0.0239477
LINC00624	6.16e-05	1.65325	0.022	0.009	1
THUMPD2	3.11e-131	1.65163	0.42	0.16	8.42e-127
GNRH1	2.8e-07	1.64998	0.027	0.009	0.00758443
QPCT	1.23e-05	1.64913	0.02	0.007	0.332661
RGS9	2.95e-27	1.64624	0.091	0.026	7.99e-23
HSPB3	1.68e-08	1.64495	0.023	0.005	0.000455565
LINC01725	3.36e-08	1.64388	0.025	0.007	0.000909635
FREM1	3.35e-35	1.6436	0.134	0.045	9.06e-31
GJA3	0.000217867	1.64309	0.01	0.002	1
AC112220.4	1.1e-05	1.64236	0.018	0.006	0.298154
FAH	1.28e-37	1.64169	0.139	0.045	3.45e-33
CLEC18A	7.46e-13	1.64025	0.056	0.022	2.02e-08
PXYLP1	2.18e-18	1.6393	0.078	0.029	5.89e-14
PIFO	0.000118473	1.63869	0.015	0.005	1
S100A4	0	1.63779	0.978	0.776	0
KIF6	5.21e-05	1.63697	0.019	0.008	1
NEDD4L	0.000116006	1.6358	0.016	0.006	1
ABCD1	4.5e-10	1.6352	0.042	0.016	1.22e-05
INHBA	1.3e-147	1.63471	0.436	0.151	3.52e-143
CIART	2.13e-34	1.63464	0.133	0.046	5.76e-30
RCN3	8.35e-121	1.63379	0.438	0.193	2.26e-116
EOGT	1.12e-90	1.63106	0.33	0.127	3.03e-86
SPRY3	0.00088509	1.62872	0.011	0.004	1
AJM1	9.81e-07	1.62646	0.03	0.012	0.0265529
DUSP15	2.52e-12	1.6256	0.045	0.015	6.81e-08
CAMKK1	1.91e-08	1.6255	0.028	0.009	0.000518363
PLSCR4	7.95e-199	1.6241	0.632	0.337	2.15e-194
OCA2	2.32e-08	1.62256	0.031	0.011	0.000629031
REP15	0.000128901	1.62226	0.014	0.005	1
LONRF3	2.22e-05	1.62178	0.021	0.008	0.600677
PRKCB	0.000243856	1.62134	0.018	0.008	1
CHAC2	2.61e-08	1.619	0.026	0.008	0.000707626
AC008429.1	0.000512978	1.61866	0.011	0.004	1
ZSCAN16	8.36e-16	1.61801	0.055	0.016	2.26e-11
WDR66	3.36e-07	1.61791	0.021	0.006	0.0090866
PCDH10	3.99e-67	1.61674	0.214	0.062	1.08e-62
AC084036.1	0.000148603	1.61632	0.015	0.005	1
PPP2R2B	9.61e-116	1.61501	0.356	0.113	2.6e-111
SPSB1	3.75e-71	1.61255	0.275	0.107	1.02e-66
NFIX	2.66e-276	1.61201	0.726	0.39	7.19e-272
LRP1	7.28e-203	1.61191	0.661	0.357	1.97e-198
HIF1A-AS2	8.12e-05	1.60928	0.015	0.005	1
AK4	3.03e-76	1.60848	0.271	0.094	8.21e-72
AC078802.1	0.0157876	1.60581	0.013	0.007	1
NQO1	3.2e-52	1.60393	0.223	0.089	8.67e-48
AC027306.1	7.54e-05	1.60207	0.012	0.003	1
LAMA5-AS1	1.61e-06	1.6004	0.023	0.008	0.0435535
EMILIN1	3.05e-169	1.59905	0.516	0.211	8.27e-165
PTPN3	6.71e-36	1.59566	0.146	0.052	1.82e-31
LMCD1	0	1.59454	0.848	0.44	0
AC079834.2	5.2e-07	1.59304	0.016	0.003	0.014075
HOXA-AS2	5.3e-05	1.5927	0.022	0.01	1
HIST1H3E	0.000104518	1.58968	0.013	0.004	1
STEAP2	7.34e-45	1.5868	0.183	0.067	1.99e-40
TTLL11	8.66e-19	1.58526	0.077	0.028	2.34e-14
PTPRD	5.66e-72	1.58441	0.28	0.106	1.53e-67
LONRF2	2.02e-26	1.58372	0.125	0.051	5.46e-22
HAND1	1.61e-07	1.58243	0.026	0.009	0.00436571
VIPR2	4.45e-40	1.58236	0.162	0.058	1.21e-35
SMCO4	3.44e-41	1.58215	0.139	0.04	9.32e-37
TBX19	6.8e-06	1.58164	0.027	0.012	0.184014
EDIL3	0	1.58097	0.86	0.462	0
DDB2	3.22e-51	1.57929	0.213	0.083	8.7e-47
PDE4DIP	9.52e-239	1.5789	0.687	0.349	2.58e-234
HSPB1	0	1.57882	0.988	0.898	0
MAP7	1.36e-14	1.57527	0.066	0.026	3.67e-10
ADGRG2	3.13e-06	1.57276	0.022	0.008	0.084664
PLP2	0	1.57223	0.799	0.526	0
CAPG	1.11e-41	1.57133	0.145	0.044	3e-37
KMT5A	5.85e-138	1.57055	0.479	0.213	1.58e-133
AC005838.2	0.000150791	1.5703	0.022	0.01	1
ANKS1B	2.67e-22	1.56961	0.101	0.039	7.22e-18
GK5	6.12e-58	1.56937	0.242	0.095	1.66e-53
MFGE8	0	1.5685	0.983	0.894	0
PLAGL1	4.79e-83	1.5671	0.375	0.18	1.3e-78
IRS2	8.03e-91	1.566	0.357	0.149	2.17e-86
CHD5	3.82e-06	1.56424	0.026	0.01	0.103472
GPRC5A	6.49e-51	1.56406	0.191	0.065	1.76e-46
SRPX2	5.85e-10	1.56366	0.046	0.019	1.58e-05
CDK15	0.0081426	1.56275	0.011	0.005	1
RAB38	1.79e-10	1.56231	0.035	0.01	4.85e-06
COL7A1	4.24e-05	1.56123	0.024	0.011	1
FAM114A1	1.72e-188	1.56061	0.588	0.284	4.67e-184
ZFP69B	0.000987355	1.56035	0.014	0.006	1
ASTN2	6.94e-12	1.56009	0.052	0.02	1.88e-07
SHISA4	5.46e-122	1.55987	0.424	0.173	1.48e-117
HSPB8	5.04e-199	1.55974	0.552	0.202	1.36e-194
PTPRD-AS1	2.2e-30	1.55674	0.122	0.043	5.96e-26
PLS3	0	1.55505	0.964	0.819	0
SDK2	3.34e-05	1.5522	0.024	0.011	0.903224
TGM2	2.06e-177	1.55204	0.448	0.124	5.57e-173
DOCK4	1.94e-11	1.55152	0.069	0.033	5.26e-07
MYH14	4.05e-09	1.55024	0.037	0.013	0.000109741
ARL6IP5	0	1.54982	0.906	0.721	0
LINC00960	1.33e-16	1.54945	0.061	0.02	3.61e-12
HSPA4L	5.25e-56	1.54935	0.216	0.078	1.42e-51
CD55	1.89e-50	1.54882	0.367	0.224	5.11e-46
ATP8A1	6.86e-11	1.54725	0.036	0.011	1.86e-06
SMAD6	8.72e-11	1.5471	0.067	0.033	2.36e-06
VDR	0.00497177	1.54571	0.011	0.004	1
TOX2	2.54e-24	1.54502	0.116	0.047	6.88e-20
PDK3	4.25e-94	1.5449	0.338	0.127	1.15e-89
F3	5.5e-27	1.54433	0.115	0.043	1.49e-22
FABP3	1.02e-80	1.54093	0.308	0.12	2.77e-76
SEC14L2	4.45e-07	1.53888	0.017	0.004	0.0120383
AC147651.1	6.35e-42	1.5362	0.154	0.05	1.72e-37
TOM1L1	1.19e-47	1.5332	0.179	0.06	3.23e-43
ROM1	1.36e-27	1.53015	0.117	0.044	3.68e-23
PYCR1	0.000398619	1.5297	0.014	0.005	1
HK2	0.0021606	1.52945	0.014	0.006	1
TRAF1	2.43e-11	1.52804	0.052	0.021	6.57e-07
RAB11FIP5	1.75e-34	1.52775	0.142	0.051	4.73e-30
CD274	0.000136166	1.52218	0.02	0.009	1
GALNT15	8.01e-07	1.52211	0.032	0.013	0.0216915
RASSF9	2.13e-23	1.52117	0.092	0.031	5.77e-19
ADAMTS17	0.000708304	1.52091	0.01	0.003	1
TIAM2	1.36e-15	1.51976	0.079	0.034	3.68e-11
NR1D1	3.63e-25	1.51341	0.122	0.051	9.82e-21
PKD1	1.97e-109	1.51282	0.463	0.229	5.34e-105
PLPP5	1.72e-64	1.51262	0.257	0.097	4.66e-60
TSPAN5	3.33e-26	1.51164	0.109	0.04	9.01e-22
KCNJ2-AS1	1.16e-05	1.50829	0.016	0.004	0.315176
TMEM47	0	1.50737	0.894	0.665	0
RASL11B	9.54e-25	1.50703	0.114	0.045	2.58e-20
KIAA1671	7.25e-72	1.50575	0.282	0.108	1.96e-67
AL590428.1	1.99e-05	1.50349	0.019	0.007	0.538144
AC009061.2	4.28e-06	1.50275	0.023	0.009	0.115843
NOS1AP	3.85e-16	1.50086	0.058	0.018	1.04e-11
GLDN	1.18e-107	1.49803	0.347	0.112	3.2e-103
LINC01266	0.000782858	1.49751	0.015	0.006	1
TNK2	2.84e-12	1.49562	0.067	0.031	7.68e-08
KHDC1	9.77e-13	1.49136	0.048	0.016	2.64e-08
AGPAT4	8.7e-15	1.49064	0.073	0.031	2.36e-10
KLHDC9	4.45e-17	1.4882	0.066	0.022	1.2e-12
SGSM1	9.18e-11	1.48772	0.044	0.016	2.49e-06
CABLES1	2.38e-14	1.48732	0.072	0.03	6.46e-10
PCDHB13	0.000259914	1.48582	0.022	0.011	1
CYP2R1	3.76e-20	1.485	0.079	0.027	1.02e-15
IGSF9B	0.00106852	1.4843	0.018	0.009	1
ZCCHC18	1.21e-05	1.48415	0.023	0.009	0.326678
PCDHGA3	7.87e-05	1.48172	0.024	0.011	1
CHPF	2.19e-77	1.47919	0.344	0.156	5.94e-73
HIF3A	1.06e-28	1.47712	0.115	0.04	2.88e-24
AKR1C3	3.14e-98	1.4762	0.376	0.155	8.49e-94
AC004839.1	2.93e-05	1.4761	0.018	0.006	0.792189
FGF22	0.00525026	1.4759	0.013	0.006	1
EGLN3	1.46e-19	1.47408	0.089	0.035	3.94e-15
AC091057.2	0.00240285	1.47316	0.011	0.004	1
HERC5	4.54e-58	1.47188	0.259	0.109	1.23e-53
RASGRP1	0.0602557	1.46843	0.014	0.009	1
EML5	0.000947084	1.46779	0.018	0.009	1
RBM38	6.42e-26	1.46743	0.102	0.035	1.74e-21
PPP1R3G	2.16e-16	1.46721	0.061	0.02	5.85e-12
GATA6-AS1	1.53e-16	1.46719	0.074	0.028	4.14e-12
LHFPL2	7.16e-10	1.466	0.055	0.025	1.94e-05
APLP2	0	1.46571	0.912	0.688	0
MTMR11	2.18e-44	1.4656	0.196	0.078	5.89e-40
RIC3	8.42e-30	1.46469	0.129	0.048	2.28e-25
CELF2	1.09e-82	1.4642	0.347	0.145	2.95e-78
LSS	6.67e-22	1.46395	0.101	0.04	1.81e-17
AKAP6	1.5e-131	1.4622	0.492	0.212	4.05e-127
REPS2	1.21e-13	1.46218	0.055	0.02	3.28e-09
TOR4A	1.65e-13	1.46202	0.068	0.029	4.46e-09
VWC2	7.17e-08	1.46051	0.019	0.004	0.0019396
RIMKLB	2.01e-100	1.45741	0.427	0.201	5.43e-96
LINC02478	0.000806305	1.45441	0.012	0.004	1
BGN	0	1.45186	0.983	0.905	0
MANSC1	7.26e-63	1.45131	0.252	0.095	1.96e-58
NEDD4	2.63e-63	1.44976	0.301	0.137	7.12e-59
AC010864.1	0.00397299	1.44713	0.01	0.004	1
SERAC1	1.35e-20	1.44642	0.093	0.036	3.66e-16
BFSP1	1.02e-10	1.44596	0.033	0.009	2.77e-06
TMEM102	2.06e-05	1.44495	0.024	0.01	0.556713
WWP2	1.45e-93	1.44356	0.423	0.204	3.93e-89
CHST11	2.74e-21	1.44237	0.094	0.035	7.42e-17
AP1S2	2.01e-104	1.44114	0.404	0.173	5.44e-100
MEF2A	2.8e-297	1.44078	0.819	0.528	7.59e-293
TGFB1	6.83e-100	1.44056	0.408	0.182	1.85e-95
ADRA1B	0.000212738	1.43862	0.016	0.006	1
CYP27A1	1.21e-53	1.4384	0.243	0.102	3.27e-49
PLXNA3	1.24e-16	1.43736	0.084	0.036	3.36e-12
RND2	5.44e-17	1.4354	0.074	0.028	1.47e-12
FBXO6	2.33e-14	1.433	0.06	0.022	6.3e-10
ARHGAP22	9.39e-11	1.43297	0.034	0.01	2.54e-06
RNF24	2.42e-88	1.43209	0.356	0.148	6.54e-84
ZBTB40	9.6e-31	1.4312	0.178	0.086	2.6e-26
TICAM1	8.31e-12	1.42873	0.057	0.024	2.25e-07
AC004825.2	1.27e-06	1.42824	0.029	0.012	0.0344316
NRP2	5.57e-51	1.42767	0.23	0.094	1.51e-46
NIPSNAP3B	4.98e-22	1.42344	0.096	0.036	1.35e-17
PPP1R14A	0	1.42299	0.983	0.9	0
PPP2R3A	1.68e-45	1.42196	0.227	0.101	4.56e-41
FRAS1	2.51e-07	1.42129	0.032	0.013	0.00679273
SEMA4D	3.83e-08	1.42125	0.035	0.013	0.00103727
CXXC4	5.65e-08	1.42082	0.032	0.012	0.00152894
RNF217	3.38e-55	1.42035	0.31	0.159	9.16e-51
RGN	9.04e-83	1.42025	0.348	0.147	2.45e-78
ADAMTS3	5.08e-06	1.41974	0.02	0.007	0.137642
CGNL1	4.7e-32	1.41897	0.112	0.033	1.27e-27
LINC00670	1.51e-20	1.41866	0.097	0.039	4.08e-16
ENO1	0	1.41639	0.86	0.672	0
AC022966.1	0.0210174	1.41239	0.015	0.009	1
BCAS4	2.75e-48	1.41148	0.18	0.059	7.45e-44
STX17-AS1	1.34e-11	1.41115	0.039	0.011	3.63e-07
CPPED1	1.62e-42	1.41031	0.192	0.078	4.39e-38
RAB39B	1.73e-05	1.40809	0.019	0.007	0.468759
SV2A	1.24e-31	1.40768	0.153	0.064	3.36e-27
RNF115	3.12e-199	1.4068	0.677	0.399	8.43e-195
SORBS1	7.98e-241	1.40534	0.757	0.427	2.16e-236
SDC3	7.33e-31	1.40471	0.151	0.064	1.99e-26
NAV1	4.86e-30	1.40407	0.197	0.102	1.31e-25
DSPP	0.0253464	1.40384	0.01	0.005	1
NMB	3.92e-35	1.40257	0.167	0.069	1.06e-30
RILPL1	8.99e-84	1.40103	0.353	0.153	2.43e-79
LINC01355	0.00011515	1.40026	0.033	0.019	1
SUN2	2.99e-160	1.39741	0.593	0.309	8.1e-156
SERINC2	6.44e-05	1.39512	0.014	0.004	1
RAB27A	3.84e-55	1.39441	0.245	0.101	1.04e-50
GADD45A	6.08e-261	1.3914	0.76	0.447	1.65e-256
MEIS1-AS2	0.000370388	1.38926	0.019	0.009	1
ITGB5	1.1e-178	1.38746	0.658	0.392	2.99e-174
FASTKD1	1.27e-06	1.38743	0.034	0.016	0.0342948
BEND5	3.9e-36	1.38687	0.172	0.071	1.06e-31
HIST1H1A	1.05e-15	1.38605	0.075	0.03	2.83e-11
S100A13	3.7e-170	1.38539	0.651	0.406	1e-165
METTL24	3.24e-10	1.3839	0.055	0.024	8.77e-06
ESYT3	0.00416454	1.38263	0.012	0.005	1
TMEM106C	8.42e-143	1.38247	0.536	0.264	2.28e-138
EMP2	0	1.37786	0.867	0.636	0
CRABP2	1.84e-07	1.37716	0.033	0.013	0.00496874
FAXC	1.81e-14	1.37635	0.057	0.02	4.9e-10
RNF141	1.84e-71	1.37542	0.324	0.143	4.98e-67
PCDHGA8	0.00120482	1.37222	0.014	0.006	1
RILPL2	3.06e-141	1.37175	0.561	0.306	8.28e-137
ZNRF3	2.61e-24	1.36922	0.135	0.061	7.07e-20
CCDC6	4.97e-137	1.36878	0.589	0.333	1.35e-132
SNRPN	1.04e-251	1.36846	0.75	0.501	2.82e-247
TPK1	5.7e-14	1.36794	0.07	0.029	1.54e-09
ABTB2	5.71e-08	1.3676	0.029	0.01	0.00154439
FBXL22	5.26e-78	1.36623	0.308	0.12	1.43e-73
UBE2QL1	2.75e-11	1.36574	0.057	0.024	7.43e-07
FBLIM1	0	1.36559	0.89	0.63	0
PABPC4L	3.78e-07	1.36517	0.051	0.028	0.0102244
GALNT18	4.07e-60	1.36493	0.282	0.122	1.1e-55
AC233280.1	0.00134213	1.36446	0.011	0.004	1
ZMPSTE24	8.1e-99	1.3638	0.43	0.205	2.19e-94
HSPG2	9.52e-173	1.3612	0.613	0.299	2.58e-168
SMO	1.91e-06	1.36103	0.037	0.018	0.0516829
TEK	7.59e-05	1.36088	0.023	0.011	1
AR	4.24e-77	1.35763	0.361	0.169	1.15e-72
SMOC2	0	1.35731	0.914	0.733	0
METAP1	3.34e-81	1.35612	0.369	0.173	9.03e-77
OLFML3	9.89e-69	1.35505	0.278	0.108	2.68e-64
HIST1H1D	8.08e-17	1.35133	0.085	0.036	2.19e-12
TVP23C	3.39e-05	1.35116	0.03	0.015	0.918565
PCGF5	1.43e-181	1.35098	0.709	0.437	3.88e-177
LNX2	7.97e-08	1.35084	0.041	0.019	0.00215651
ITPR1-DT	0.000685298	1.34859	0.014	0.005	1
MSC	2.55e-50	1.34726	0.253	0.113	6.91e-46
CAMK2B	0.000256466	1.34716	0.016	0.006	1
STN1	2.28e-45	1.34701	0.211	0.087	6.17e-41
FUCA1	5.12e-68	1.34674	0.321	0.147	1.39e-63
TMBIM1	8.92e-149	1.34651	0.587	0.335	2.42e-144
ZNF827	1.46e-30	1.34606	0.137	0.053	3.96e-26
GALNT7	1.01e-46	1.34593	0.221	0.093	2.72e-42
SPEG	2.31e-150	1.34556	0.542	0.242	6.24e-146
GPNMB	9.32e-183	1.34527	0.648	0.342	2.52e-178
SLC25A4	0	1.34357	0.847	0.569	0
SMS	3.47e-143	1.34356	0.552	0.29	9.4e-139
PTPRM	1.83e-25	1.34292	0.174	0.091	4.96e-21
NTN1	6.7e-23	1.34252	0.137	0.065	1.81e-18
TMEM25	4.91e-58	1.34251	0.266	0.112	1.33e-53
LGI1	1.18e-09	1.33913	0.041	0.016	3.19e-05
SLC29A1	1.38e-74	1.3382	0.34	0.155	3.75e-70
SH3BGRL3	3.14e-237	1.33653	0.789	0.628	8.51e-233
PRR34-AS1	5.44e-71	1.33621	0.297	0.12	1.47e-66
JMJD1C-AS1	0.000865605	1.33586	0.013	0.005	1
AC027031.2	4.47e-38	1.33239	0.198	0.089	1.21e-33
GOLGA8B	4.07e-56	1.33212	0.32	0.162	1.1e-51
C1orf115	1.76e-18	1.3318	0.079	0.029	4.77e-14
FSD1L	1.35e-05	1.32958	0.035	0.018	0.365396
LINC02580	0.00213009	1.32911	0.012	0.005	1
NOTCH2	2.7e-74	1.32821	0.392	0.204	7.3e-70
RBP7	9.75e-48	1.32809	0.139	0.033	2.64e-43
AC020916.1	1.01e-38	1.32754	0.157	0.056	2.72e-34
GPX8	3.29e-65	1.32687	0.329	0.16	8.89e-61
TIFA	4.1e-29	1.32612	0.127	0.047	1.11e-24
ANKRD44	1.76e-24	1.32523	0.156	0.078	4.75e-20
TYMS	2.68e-10	1.32414	0.052	0.022	7.25e-06
TMSB4Y	2.61e-08	1.32099	0.037	0.015	0.000707787
PCDHGB5	5.57e-07	1.32038	0.03	0.012	0.0150708
SYDE2	1.5e-34	1.32024	0.16	0.064	4.07e-30
SGK3	1.65e-36	1.31973	0.186	0.082	4.45e-32
NAA40	3.52e-09	1.31899	0.038	0.014	9.53e-05
SNX30	4.1e-13	1.31859	0.061	0.024	1.11e-08
MTHFD1L	3.32e-50	1.31844	0.227	0.093	8.99e-46
NUCB2	8.87e-152	1.31736	0.618	0.363	2.4e-147
S100A2	4.38e-08	1.31645	0.037	0.015	0.00118701
VAT1	1.94e-86	1.31563	0.386	0.177	5.26e-82
SRRM3	0.00459534	1.31533	0.012	0.006	1
PCDHGA5	1.12e-07	1.31504	0.044	0.021	0.00303595
CMBL	1.26e-64	1.31484	0.295	0.128	3.4e-60
CNTN4	7.83e-91	1.31398	0.429	0.214	2.12e-86
TMEM38A	1.8e-11	1.31345	0.055	0.022	4.89e-07
LYL1	5.42e-14	1.31246	0.059	0.022	1.47e-09
AC112229.3	4.79e-06	1.31121	0.022	0.008	0.129697
JAK2	7.67e-98	1.31106	0.444	0.218	2.08e-93
MPPED2	2.79e-35	1.30994	0.176	0.075	7.57e-31
ADGRE5	4.99e-121	1.30988	0.561	0.329	1.35e-116
GLS	1.28e-227	1.30931	0.788	0.518	3.47e-223
LINC00310	9.54e-31	1.30808	0.124	0.042	2.58e-26
RRAGD	6.34e-29	1.30419	0.124	0.045	1.72e-24
SMOC1	1.45e-05	1.30225	0.019	0.007	0.392059
TMCO3	1.36e-95	1.30216	0.455	0.235	3.69e-91
C19orf47	5.77e-11	1.30171	0.061	0.028	1.56e-06
SYNC	3.68e-95	1.3005	0.462	0.244	9.97e-91
CLIC4	0	1.29786	0.905	0.694	0
VWA5A	1.1e-29	1.29538	0.145	0.061	2.97e-25
AC005358.2	0.0358342	1.29369	0.01	0.006	1
RNF217-AS1	0.00105721	1.29365	0.028	0.016	1
OXCT1	6.46e-71	1.29324	0.334	0.153	1.75e-66
CD151	0	1.29234	0.955	0.876	0
AC110285.6	1.15e-06	1.2889	0.023	0.008	0.031143
ST6GALNAC3	0.00499533	1.28661	0.012	0.006	1
PNMA2	4.47e-14	1.28498	0.077	0.034	1.21e-09
CARMIL1	2.56e-85	1.28498	0.381	0.17	6.92e-81
EHD3	1.2e-30	1.28494	0.176	0.083	3.26e-26
ITGA5	9.95e-24	1.28465	0.14	0.066	2.69e-19
TANC2	1.25e-13	1.28228	0.071	0.031	3.4e-09
EVC	8.06e-22	1.28076	0.147	0.075	2.18e-17
ABCA3	4.57e-10	1.27943	0.058	0.027	1.24e-05
RANBP9	2.05e-55	1.27858	0.315	0.161	5.54e-51
SBSPON	1.59e-106	1.2784	0.447	0.204	4.29e-102
SC5D	1.52e-38	1.27666	0.191	0.082	4.11e-34
AL596202.1	0.00086071	1.27488	0.017	0.008	1
MN1	5.05e-28	1.27478	0.131	0.052	1.37e-23
Z95114.4	0.00797213	1.27467	0.014	0.007	1
SNURF	2.02e-07	1.27461	0.038	0.017	0.005481
MOCOS	0.00138169	1.27444	0.013	0.005	1
ALDH5A1	9.98e-11	1.27444	0.058	0.026	2.7e-06
YPEL1	6.02e-15	1.27406	0.077	0.033	1.63e-10
ACTN1	0	1.27311	0.959	0.753	0
ARHGEF9	2.3e-108	1.27268	0.506	0.272	6.23e-104
AL357055.3	0.00617487	1.26906	0.017	0.01	1
DNM3OS	5.8e-34	1.26903	0.168	0.07	1.57e-29
PPP1R26	2.44e-09	1.2685	0.039	0.015	6.61e-05
ZEB1	2.6e-227	1.26833	0.752	0.416	7.04e-223
GKAP1	2.54e-47	1.26738	0.215	0.086	6.88e-43
DNAJC28	4.35e-05	1.26698	0.023	0.01	1
BAG2	1.18e-114	1.26696	0.515	0.27	3.19e-110
NUDT11	4.22e-11	1.26688	0.048	0.018	1.14e-06
SYT11	1.3e-95	1.26616	0.483	0.264	3.53e-91
SFXN3	3.05e-48	1.26538	0.236	0.102	8.26e-44
AC245060.6	0.0127009	1.2648	0.012	0.006	1
PPM1J	2.07e-12	1.26308	0.058	0.024	5.6e-08
C5AR1	3.23e-06	1.26263	0.031	0.014	0.0873731
GGACT	0.000526709	1.26154	0.016	0.007	1
AC021054.1	2.55e-05	1.25997	0.021	0.008	0.691591
NOMO3	0.00754122	1.25799	0.016	0.009	1
DDAH1	2.63e-30	1.25775	0.169	0.077	7.13e-26
KCND3	9.79e-07	1.25725	0.042	0.021	0.0264985
C11orf80	0.00111292	1.25532	0.019	0.009	1
AL137186.2	5.69e-10	1.25506	0.037	0.013	1.54e-05
AC079329.1	3.2e-06	1.2544	0.026	0.01	0.0866367
PGR	6.04e-71	1.25369	0.367	0.179	1.64e-66
NCR3LG1	0.000665491	1.25318	0.018	0.008	1
MCCC2	5.46e-21	1.25108	0.155	0.083	1.48e-16
SSFA2	4.41e-97	1.24944	0.475	0.251	1.19e-92
ZNF483	8.72e-23	1.24655	0.149	0.075	2.36e-18
AL031846.2	0.0137969	1.24597	0.028	0.019	1
TYRO3	0.00516591	1.24501	0.014	0.007	1
FCHSD1	8.97e-11	1.24486	0.054	0.023	2.43e-06
PURG	5.45e-10	1.24338	0.048	0.02	1.47e-05
LRRFIP1	0	1.24209	0.859	0.612	0
AC106791.1	3.11e-05	1.24113	0.024	0.011	0.841775
MSMO1	1.1e-30	1.24032	0.182	0.088	2.99e-26
AC011447.3	0.00235954	1.24023	0.014	0.007	1
WNT2B	4.01e-08	1.23913	0.056	0.029	0.00108677
HABP4	2.69e-95	1.23824	0.448	0.226	7.28e-91
PPM1K	1.95e-90	1.23754	0.466	0.251	5.28e-86
FGF14	1.1e-10	1.23706	0.089	0.05	2.98e-06
KLF15	2.27e-35	1.23606	0.212	0.105	6.15e-31
KRT8	3.77e-52	1.2345	0.254	0.111	1.02e-47
RYR2	2.83e-53	1.23449	0.314	0.163	7.67e-49
GALNT3	0.00362483	1.23351	0.015	0.008	1
LTBP3	2.77e-135	1.2335	0.633	0.401	7.5e-131
ABLIM3	7.76e-08	1.23308	0.044	0.02	0.00210107
ALDOC	1.99e-38	1.23259	0.197	0.087	5.38e-34
GNAZ	0.000102999	1.23201	0.023	0.011	1
FLNB	1.69e-17	1.23073	0.141	0.079	4.57e-13
RPS6KA6	1.68e-15	1.22943	0.082	0.035	4.54e-11
ATP10D	2.22e-60	1.22897	0.35	0.183	6e-56
ANKRD35	2.99e-55	1.22878	0.264	0.113	8.09e-51
ZDHHC2	7.94e-33	1.22747	0.184	0.085	2.15e-28
ANKS6	8.42e-09	1.22726	0.054	0.026	0.00022785
SPR	2.91e-30	1.22682	0.152	0.064	7.87e-26
ANXA2	0	1.22532	0.91	0.752	0
AL139089.1	5.38e-07	1.22426	0.021	0.006	0.0145676
VIM	0	1.22411	1	0.999	0
STX3	1.32e-17	1.22294	0.109	0.053	3.59e-13
AC092171.5	0.00155203	1.22219	0.011	0.004	1
MPST	3.56e-68	1.22215	0.333	0.157	9.64e-64
AL133415.1	0.00130755	1.22132	0.014	0.006	1
FSTL1	6.33e-182	1.22014	0.767	0.506	1.71e-177
HEPH	3.26e-44	1.22005	0.268	0.135	8.83e-40
CHADL	6.87e-06	1.21843	0.017	0.005	0.185991
FBLN1	1.97e-30	1.21829	0.18	0.086	5.33e-26
PLB1	2.33e-06	1.21703	0.021	0.007	0.0629633
GAREM1	2.08e-30	1.21642	0.173	0.08	5.63e-26
AC024060.1	0.0116574	1.21576	0.015	0.008	1
B4GALT6	0.00820877	1.21542	0.017	0.009	1
LINC01137	2.51e-16	1.21491	0.072	0.027	6.79e-12
PRDM5	1.59e-13	1.21393	0.105	0.057	4.29e-09
PCDHB11	7.43e-11	1.21333	0.068	0.033	2.01e-06
ZNF704	2.46e-139	1.21332	0.628	0.359	6.66e-135
LGR5	5.16e-05	1.21332	0.021	0.009	1
FAM13B	3.65e-82	1.21278	0.422	0.218	9.87e-78
NINL	4.71e-12	1.2127	0.063	0.027	1.28e-07
SH3BP5-AS1	0.000179369	1.2094	0.041	0.025	1
SFT2D2	8.85e-78	1.20927	0.439	0.242	2.4e-73
AC027237.3	1.94e-07	1.20749	0.033	0.013	0.00524376
ICAM3	1.55e-20	1.20677	0.111	0.049	4.21e-16
TPM2	0	1.20668	0.997	0.991	0
SRD5A1	1.31e-10	1.20654	0.064	0.031	3.54e-06
LINC00839	0.000451874	1.20478	0.017	0.007	1
SLC17A5	3.62e-24	1.20181	0.144	0.068	9.8e-20
AUTS2	2.34e-23	1.20091	0.193	0.111	6.33e-19
GPM6A	3.96e-06	1.20043	0.048	0.027	0.107262
EMP3	1.65e-208	1.19828	0.758	0.534	4.47e-204
PHGDH	3.32e-43	1.19659	0.245	0.118	8.98e-39
HDAC9	1.37e-52	1.1955	0.326	0.174	3.71e-48
FAM129A	0	1.19519	0.914	0.618	0
KLHL21	3.92e-25	1.19513	0.148	0.07	1.06e-20
PLXNA1	2.59e-14	1.19471	0.107	0.057	7.01e-10
BEX4	1.15e-143	1.19399	0.607	0.351	3.11e-139
NPC2	1.55e-158	1.19347	0.676	0.452	4.2e-154
LZTS3	3.35e-06	1.19287	0.043	0.023	0.0906252
HIST1H4D	0.000310889	1.1914	0.02	0.009	1
SLC22A2	1.55e-06	1.18977	0.027	0.011	0.0420755
AP005264.1	0.000837516	1.18975	0.011	0.004	1
PRKD1	1.11e-17	1.18818	0.086	0.035	3e-13
ATP9A	1.52e-32	1.18783	0.218	0.113	4.12e-28
GAB1	1.34e-45	1.18754	0.295	0.156	3.63e-41
RAB9B	2.15e-26	1.18739	0.153	0.071	5.82e-22
TBL1X	1.87e-79	1.18566	0.445	0.246	5.06e-75
FAM221A	3.99e-13	1.18562	0.064	0.026	1.08e-08
PPIC	2.03e-134	1.18393	0.589	0.34	5.49e-130
PRDM16	6.52e-41	1.18337	0.227	0.104	1.76e-36
TBC1D8-AS1	0.00311802	1.18332	0.019	0.01	1
DIAPH1	8.48e-43	1.18297	0.26	0.132	2.3e-38
SACS	5.76e-47	1.18006	0.351	0.206	1.56e-42
PLAC4	0.00889875	1.17975	0.023	0.015	1
ADARB1	3.92e-54	1.17966	0.338	0.182	1.06e-49
TRIO	1.21e-34	1.17902	0.251	0.139	3.28e-30
PPP1R9A	7.92e-16	1.17829	0.138	0.079	2.14e-11
SKIL	1.18e-102	1.17757	0.523	0.29	3.2e-98
KLHL42	9.54e-92	1.17748	0.547	0.343	2.58e-87
ABI3BP	3.15e-31	1.17693	0.201	0.1	8.54e-27
ATF7IP2	6.09e-14	1.17613	0.092	0.046	1.65e-09
TPM1-AS	0.00152792	1.17612	0.022	0.012	1
MLKL	9.67e-05	1.17597	0.032	0.018	1
GPR137B	2.06e-14	1.17547	0.088	0.042	5.59e-10
ACAD11	0.00214985	1.17373	0.022	0.012	1
METRNL	5.09e-92	1.17281	0.423	0.2	1.38e-87
AC079148.1	0.100548	1.17243	0.011	0.007	1
COL1A2	6.41e-129	1.17206	0.895	0.789	1.74e-124
ARHGAP23	5.34e-17	1.17083	0.124	0.066	1.45e-12
NINJ1	3.29e-101	1.17066	0.483	0.248	8.91e-97
DBN1	1.48e-44	1.17018	0.264	0.133	4e-40
AC092164.1	3.14e-85	1.16843	0.381	0.166	8.5e-81
PPP1R12B	0	1.16741	0.938	0.74	0
WDR41	7.33e-45	1.16701	0.276	0.141	1.99e-40
ERCC6	6.37e-28	1.16592	0.211	0.115	1.72e-23
COL4A2	6.17e-260	1.16573	0.87	0.668	1.67e-255
AC005332.4	0.00922723	1.16573	0.019	0.011	1
IGF1R	7.1e-63	1.16473	0.406	0.232	1.92e-58
N4BP2	3.27e-16	1.16322	0.093	0.043	8.84e-12
CHD1L	6.1e-33	1.16256	0.211	0.106	1.65e-28
ZNF106	6.08e-140	1.16149	0.681	0.45	1.65e-135
SCHIP1	0.000191559	1.16084	0.031	0.018	1
FGF1	5.72e-39	1.1607	0.197	0.084	1.55e-34
FECH	6.88e-15	1.15895	0.085	0.038	1.86e-10
ENO2	7.31e-46	1.15818	0.282	0.144	1.98e-41
AC124016.1	0.000125609	1.15715	0.028	0.014	1
ITGAV	2.05e-104	1.15662	0.569	0.35	5.55e-100
LINC00265	0.00311374	1.15643	0.019	0.011	1
TWSG1	5.79e-155	1.15641	0.673	0.408	1.57e-150
ASPN	1.52e-187	1.15626	0.792	0.528	4.11e-183
ABAT	7.04e-10	1.154	0.045	0.018	1.91e-05
FLNC	1.16e-55	1.15392	0.241	0.095	3.15e-51
BCAR1	9.35e-76	1.15283	0.37	0.176	2.53e-71
CHDH	0.0103719	1.15153	0.014	0.008	1
C1orf226	0.0109065	1.15095	0.013	0.007	1
ACTA1	0.000134269	1.14854	0.012	0.004	1
DCLK2	5.2e-21	1.14847	0.122	0.056	1.41e-16
LDLRAD2	8.48e-06	1.14822	0.031	0.015	0.229598
WNK3	1.18e-11	1.14804	0.073	0.035	3.18e-07
ATP8B1	4.34e-63	1.14696	0.38	0.202	1.17e-58
RBP1	3.54e-87	1.14645	0.347	0.135	9.59e-83
MIR133A1HG	8.33e-05	1.14614	0.027	0.013	1
CTNNAL1	1.61e-80	1.14552	0.436	0.228	4.35e-76
DHCR7	1.79e-12	1.14515	0.056	0.022	4.84e-08
C15orf65	3.34e-08	1.14449	0.031	0.011	0.000903281
CSTF2T	4.78e-22	1.14409	0.14	0.068	1.3e-17
CDKL5	1.13e-34	1.14226	0.236	0.124	3.05e-30
LAMC3	0.0100343	1.14225	0.014	0.007	1
CD9	0	1.14187	0.928	0.761	0
BCAP29	5.39e-228	1.14094	0.821	0.618	1.46e-223
MAN2B2	1.33e-34	1.13997	0.235	0.124	3.6e-30
LSM11	3.08e-08	1.13987	0.051	0.025	0.000833535
PTTG1IP	6.83e-200	1.13926	0.772	0.544	1.85e-195
PGM3	1.98e-29	1.1391	0.208	0.11	5.37e-25
ERBB2	8.61e-33	1.13836	0.193	0.092	2.33e-28
PDLIM7	2.69e-288	1.13802	0.859	0.649	7.28e-284
FGFR1	1.35e-121	1.13596	0.594	0.336	3.65e-117
SLC16A1	1.71e-21	1.13593	0.152	0.079	4.63e-17
AC114284.1	9.96e-07	1.13532	0.03	0.013	0.026963
CSTB	1.31e-202	1.13345	0.761	0.565	3.55e-198
TNS3	3.55e-51	1.13339	0.339	0.186	9.61e-47
GSAP	3.23e-05	1.13268	0.036	0.02	0.874592
SH2D4A	0.00218401	1.13246	0.015	0.007	1
USP46	8.68e-36	1.13153	0.248	0.133	2.35e-31
GSTM2	4.74e-20	1.12824	0.136	0.069	1.28e-15
PCDHGA2	0.000218112	1.12797	0.023	0.011	1
HHEX	0.000586428	1.12772	0.024	0.013	1
CTSZ	3.42e-133	1.1275	0.687	0.508	9.25e-129
ANG	2.58e-62	1.12745	0.344	0.171	6.98e-58
HIST1H4E	3.51e-21	1.12663	0.153	0.08	9.51e-17
ATP6V0E2	6.23e-42	1.12655	0.226	0.102	1.69e-37
TTC39B	2.96e-30	1.1254	0.238	0.135	8.02e-26
ATP1B1	3.92e-56	1.12479	0.293	0.134	1.06e-51
LRP2BP	4e-08	1.12361	0.057	0.03	0.0010834
YDJC	3.76e-23	1.12336	0.105	0.04	1.02e-18
MBNL1-AS1	6.33e-73	1.12285	0.467	0.277	1.71e-68
UCP2	0.000187194	1.12258	0.024	0.012	1
SLC9A7	2.09e-05	1.12193	0.026	0.011	0.565991
USP27X-AS1	7.27e-05	1.12109	0.019	0.008	1
CCL28	3e-16	1.12005	0.087	0.038	8.12e-12
CHRFAM7A	0.0346981	1.11983	0.015	0.009	1
ANXA4	5.41e-131	1.1189	0.618	0.388	1.46e-126
AL139147.1	0.107586	1.11872	0.014	0.01	1
PTGFRN	2.32e-15	1.11831	0.113	0.06	6.27e-11
DHRS3	4.91e-38	1.11599	0.204	0.091	1.33e-33
HTR2B	0.023188	1.11406	0.012	0.007	1
C11orf24	7.33e-32	1.11292	0.217	0.113	1.99e-27
P4HA3	8.55e-06	1.11232	0.021	0.008	0.231462
YWHAH	1.72e-214	1.11215	0.792	0.577	4.65e-210
DUSP7	5.75e-19	1.11121	0.117	0.056	1.56e-14
AC008915.2	0.00131288	1.10987	0.016	0.008	1
UBXN2B	1.99e-19	1.10951	0.122	0.059	5.4e-15
OSBPL2	4.03e-38	1.10867	0.219	0.104	1.09e-33
FMNL2	1.25e-37	1.10851	0.24	0.122	3.38e-33
ZNF273	4.12e-11	1.10787	0.065	0.031	1.11e-06
AC124312.1	1.81e-15	1.10734	0.094	0.044	4.89e-11
DIP2C	1.18e-32	1.10713	0.237	0.129	3.2e-28
NLGN1	1.96e-14	1.10706	0.121	0.069	5.31e-10
GAB2	6.59e-13	1.10696	0.108	0.061	1.78e-08
ZFYVE21	1.61e-146	1.10591	0.648	0.407	4.36e-142
GPC1	2.08e-43	1.10418	0.298	0.163	5.62e-39
COPZ2	1.06e-115	1.1032	0.593	0.377	2.86e-111
SSPN	9.9e-210	1.10293	0.797	0.564	2.68e-205
KCTD21	4.01e-07	1.1006	0.038	0.017	0.0108518
PLEKHF1	9.62e-21	1.09974	0.128	0.061	2.6e-16
AC007193.1	0.0127674	1.09952	0.012	0.006	1
AL355488.1	0.00447297	1.09885	0.017	0.009	1
ARHGEF10	3.29e-14	1.09831	0.111	0.06	8.9e-10
TRMT9B	6.46e-09	1.09798	0.052	0.025	0.000174867
EPM2A	3.72e-17	1.09591	0.117	0.059	1.01e-12
ASB2	8.82e-13	1.09542	0.102	0.056	2.39e-08
INHBA-AS1	1.21e-06	1.09532	0.03	0.013	0.0326889
CTBS	4.82e-73	1.09526	0.442	0.252	1.31e-68
AL139398.1	0.00745749	1.09489	0.015	0.008	1
GIPC2	0.000367529	1.09459	0.025	0.013	1
SLC17A9	0.000662949	1.09432	0.02	0.01	1
AC015917.2	0.000836531	1.09327	0.014	0.006	1
HOXA3	7.16e-06	1.09312	0.05	0.029	0.1939
P3H3	5.19e-36	1.09247	0.205	0.095	1.4e-31
C12orf75	0	1.09146	0.89	0.494	0
FTL	0	1.09006	0.995	0.991	0
IQCJ-SCHIP1	1.57e-12	1.08944	0.078	0.038	4.25e-08
ITGA2	1.79e-06	1.08901	0.039	0.019	0.0484793
PSORS1C1	8.55e-09	1.08844	0.049	0.023	0.000231552
TOMM34	4.98e-11	1.08804	0.08	0.042	1.35e-06
ST6GAL1	1.48e-27	1.08767	0.153	0.069	3.99e-23
TM7SF2	5.54e-12	1.08707	0.059	0.024	1.5e-07
ZNF98	0.00348415	1.08696	0.014	0.007	1
MAGIX	4.34e-05	1.08558	0.031	0.016	1
VOPP1	2.59e-50	1.08467	0.288	0.142	7e-46
AC007405.3	4.94e-07	1.08461	0.039	0.018	0.013361
CASP6	1.25e-22	1.08449	0.136	0.064	3.39e-18
PTCHD4	0.058321	1.08386	0.011	0.007	1
AC105277.1	0.00146815	1.08265	0.01	0.004	1
HECTD2	1.23e-27	1.082	0.205	0.112	3.32e-23
PSD3	1.38e-15	1.08171	0.122	0.067	3.73e-11
KAT2B	1.42e-23	1.08108	0.161	0.082	3.84e-19
CAB39	4e-48	1.07996	0.402	0.253	1.08e-43
GLCE	1.59e-13	1.07922	0.081	0.039	4.31e-09
C9orf3	1.77e-257	1.0788	0.829	0.588	4.78e-253
ACSS2	3.78e-23	1.07857	0.173	0.092	1.02e-18
FAM50B	1.97e-40	1.07682	0.239	0.115	5.33e-36
MAP4	0	1.07676	0.908	0.758	0
MAP6	2.57e-15	1.07625	0.108	0.055	6.97e-11
ADA2	1.97e-08	1.07544	0.059	0.031	0.000532013
KLF3	4.35e-71	1.07504	0.405	0.213	1.18e-66
PGRMC1	6.55e-180	1.07314	0.75	0.554	1.77e-175
XPNPEP1	9.83e-15	1.07298	0.116	0.063	2.66e-10
SERGEF	6.16e-53	1.07279	0.344	0.187	1.67e-48
PABPC1L	0.00197616	1.07267	0.031	0.019	1
COMTD1	4.61e-36	1.07261	0.259	0.142	1.25e-31
SNX18	5.05e-102	1.0725	0.585	0.367	1.37e-97
HOMER3	2.52e-28	1.07231	0.189	0.096	6.83e-24
AL031772.1	0.0324456	1.07187	0.01	0.005	1
NOMO2	2.83e-05	1.0717	0.023	0.01	0.766405
RNASET2	3.82e-45	1.07048	0.259	0.125	1.03e-40
LINC02185	0.00890476	1.07029	0.021	0.013	1
SEMA3B	1.47e-20	1.07009	0.127	0.06	3.97e-16
AC116407.2	2.17e-08	1.06998	0.037	0.015	0.000587443
PDCD1LG2	0.00150538	1.06841	0.016	0.008	1
PFKP	4.37e-61	1.06728	0.378	0.204	1.18e-56
ALDH3A2	1.13e-37	1.06648	0.286	0.164	3.05e-33
BACE2	1.65e-60	1.06624	0.389	0.215	4.47e-56
ADI1	1.39e-278	1.06619	0.851	0.698	3.77e-274
AL606491.1	3.66e-06	1.06614	0.037	0.018	0.0991348
HSPA1L	0.0106309	1.066	0.011	0.005	1
SFN	0.0346402	1.06594	0.01	0.005	1
GOLGA6L10	0.304398	1.06542	0.011	0.009	1
LINC01588	0.00639208	1.06417	0.015	0.008	1
TMEM37	4.78e-13	1.0636	0.078	0.036	1.3e-08
SLC26A2	6.35e-27	1.06346	0.221	0.126	1.72e-22
DSTN	0	1.06307	0.998	0.989	0
TMSB15B.1	3.1e-06	1.06181	0.038	0.019	0.0838134
CRTAC1	0.0146647	1.06063	0.01	0.015	1
SHMT1	5.4e-10	1.05917	0.047	0.019	1.46e-05
KCNC1	0.0338952	1.05865	0.014	0.009	1
EPB41L4A-DT	0.00135751	1.05854	0.015	0.007	1
CALU	2.28e-159	1.05843	0.748	0.566	6.18e-155
WDR19	1.85e-24	1.05817	0.19	0.105	5.01e-20
WEE1	1.65e-31	1.058	0.213	0.109	4.47e-27
DOK4	2.58e-16	1.0576	0.104	0.051	7e-12
ETV5	7.76e-15	1.05671	0.093	0.045	2.1e-10
RRBP1	3.66e-97	1.0556	0.597	0.391	9.89e-93
FAM111A-DT	4.05e-06	1.05489	0.045	0.025	0.109751
AC019131.2	0.0346812	1.05414	0.01	0.005	1
MXRA7	1.12e-297	1.05369	0.889	0.762	3.02e-293
VEZT	3.08e-66	1.05358	0.463	0.285	8.33e-62
PCDHGA4	0.0393123	1.05249	0.015	0.009	1
ZNF438	3.27e-22	1.05201	0.159	0.083	8.86e-18
SLC41A1	2.58e-16	1.05155	0.161	0.098	6.98e-12
GAPDH	0	1.05143	0.978	0.976	0
SLC7A7	1.45e-05	1.05113	0.031	0.015	0.392459
CA12	0.00191242	1.05056	0.021	0.011	1
PLCD1	1.16e-14	1.05041	0.107	0.056	3.15e-10
RHOBTB2	3.64e-15	1.05018	0.108	0.056	9.85e-11
CALCOCO1	2.99e-77	1.05013	0.51	0.318	8.1e-73
TMIE	4.87e-08	1.0499	0.028	0.009	0.00131849
AMACR	0.00722726	1.04972	0.018	0.011	1
WDPCP	3.25e-12	1.04939	0.097	0.053	8.81e-08
PDLIM5	1.53e-251	1.04932	0.863	0.61	4.14e-247
ST7	1.33e-15	1.04931	0.134	0.076	3.61e-11
CADM4	4.27e-07	1.04929	0.045	0.022	0.0115684
FMO4	1.15e-15	1.04915	0.086	0.038	3.12e-11
AC093827.4	1.64e-08	1.04865	0.045	0.02	0.000444943
MAPK4	0.000454639	1.04808	0.019	0.009	1
KCNMB1	1.38e-176	1.04776	0.645	0.289	3.73e-172
PCBD1	6.09e-103	1.04769	0.545	0.319	1.65e-98
SCN2A	2.16e-05	1.04741	0.029	0.014	0.584127
CREB3L2	2.12e-65	1.04738	0.499	0.326	5.74e-61
PCDHB10	0.000151008	1.04728	0.038	0.023	1
SEC16B	0.000303488	1.04724	0.021	0.01	1
FRYL	1.27e-78	1.04656	0.535	0.334	3.43e-74
ORMDL3	1.79e-17	1.04578	0.135	0.073	4.86e-13
TUBA4A	1.25e-45	1.04508	0.247	0.113	3.39e-41
NEK6	7.31e-07	1.04491	0.055	0.031	0.0197796
CLCN5	0.0226125	1.04419	0.022	0.015	1
PGAP3	6.63e-10	1.04408	0.053	0.024	1.79e-05
ACSL3	1.81e-96	1.04228	0.567	0.35	4.91e-92
LARP6	1.59e-58	1.04158	0.369	0.2	4.3e-54
QSOX1	1.21e-39	1.04108	0.278	0.15	3.29e-35
FGF2	9.05e-56	1.04068	0.39	0.222	2.45e-51
AC107068.1	0.0450017	1.04062	0.015	0.01	1
FOXN3	1.15e-90	1.04037	0.594	0.398	3.11e-86
SBF2-AS1	0.000137642	1.0399	0.025	0.013	1
MGST1	5.6e-06	1.03777	0.029	0.013	0.151624
ADH5	4.36e-243	1.03768	0.836	0.703	1.18e-238
DAP	8.5e-71	1.03674	0.435	0.245	2.3e-66
SLC25A29	2e-15	1.03664	0.106	0.053	5.42e-11
DYRK4	1.33e-47	1.03624	0.295	0.152	3.6e-43
EXOC6	1.71e-22	1.03565	0.157	0.08	4.63e-18
TBC1D10A	1.52e-22	1.03461	0.147	0.073	4.11e-18
P3H2	1.05e-15	1.03381	0.123	0.067	2.84e-11
RSAD2	0.157503	1.03376	0.021	0.016	1
STMP1	2.05e-91	1.03362	0.546	0.341	5.56e-87
AC005498.2	0.00802985	1.03362	0.015	0.008	1
FSCN1	2.33e-05	1.03244	0.048	0.029	0.631836
TIMP2	1.86e-263	1.03154	0.914	0.753	5.03e-259
CDK5RAP2	4.69e-59	1.03104	0.422	0.251	1.27e-54
SLC46A1	3.07e-06	1.03032	0.048	0.027	0.0832332
CCPG1	5.68e-176	1.03011	0.765	0.564	1.54e-171
SYNE1	4.18e-137	1.02908	0.821	0.635	1.13e-132
PPP1R13B	1.03e-06	1.02873	0.045	0.023	0.0280116
NEU3	0.000100738	1.02848	0.034	0.019	1
SNX9	1.99e-88	1.02516	0.562	0.361	5.4e-84
KCTD9	1.6e-57	1.02491	0.416	0.249	4.32e-53
PPIP5K2	5.77e-67	1.02417	0.491	0.305	1.56e-62
PLA2G15	1.2e-08	1.02297	0.055	0.027	0.000325605
SAMD14	8.36e-06	1.02288	0.027	0.011	0.226193
PLIN3	2.32e-66	1.02285	0.418	0.238	6.27e-62
TTLL7	1.94e-150	1.02013	0.765	0.525	5.26e-146
TRIM47	5.63e-65	1.01907	0.363	0.18	1.52e-60
MMP28	4.36e-07	1.01739	0.025	0.008	0.0118038
FAM136A	3.36e-44	1.0158	0.294	0.155	9.09e-40
GBE1	1.39e-41	1.01514	0.322	0.186	3.77e-37
ANTXR1	3.62e-135	1.01491	0.789	0.605	9.81e-131
ELMO1	0.00698979	1.01487	0.019	0.011	1
PLA2R1	6.36e-29	1.01356	0.226	0.125	1.72e-24
SATB1	3.82e-18	1.01339	0.148	0.082	1.03e-13
FADS2	9.6e-29	1.01306	0.223	0.122	2.6e-24
CD34	2.49e-17	1.01256	0.115	0.057	6.75e-13
DNASE2	2.07e-50	1.01244	0.322	0.169	5.6e-46
FEZ1	3.21e-89	1.01203	0.542	0.34	8.68e-85
HIST1H1E	1.72e-36	1.01199	0.351	0.228	4.66e-32
AC027307.2	0.0341188	1.01191	0.013	0.008	1
AL137003.2	0.0108814	1.01178	0.014	0.007	1
CATSPER2	0.000102243	1.01039	0.049	0.031	1
HOOK2	4.7e-17	1.0091	0.184	0.116	1.27e-12
AP005329.3	3.74e-15	1.00846	0.112	0.059	1.01e-10
ARHGEF4	2.63e-06	1.00634	0.024	0.009	0.0711423
AC245060.5	3.34e-06	1.00498	0.068	0.043	0.0904908
FAM13A-AS1	0.0144112	1.00489	0.02	0.013	1
FYCO1	1.23e-47	1.00398	0.351	0.202	3.33e-43
AC005180.1	0.000350348	1.00363	0.019	0.009	1
NEDD9	1.52e-51	1.00325	0.325	0.171	4.11e-47
TTC13	8.06e-08	1.00227	0.052	0.027	0.00218054
TSPO	2.12e-229	1.00219	0.827	0.704	5.74e-225
CARMN	7.05e-74	1.00205	0.811	0.679	1.91e-69
ABCA2	7.55e-07	1.00203	0.074	0.047	0.0204482
TXNRD1	6.3e-61	1.00073	0.505	0.345	1.71e-56
AEBP1	2.97e-170	1.00035	0.89	0.793	8.04e-166
ERGIC1	7.31e-44	0.999146	0.344	0.203	1.98e-39
INPP5F	1.57e-20	0.999137	0.155	0.083	4.26e-16
TRIM73	3.02e-21	0.999134	0.146	0.074	8.18e-17
SIX2	0.000698909	0.998067	0.027	0.015	1
AC008906.1	0.27638	0.997503	0.011	0.009	1
GBP3	3.75e-22	0.997183	0.153	0.077	1.02e-17
SLC26A6	3.14e-07	0.99673	0.04	0.018	0.00849757
CRELD1	9.03e-44	0.994831	0.306	0.169	2.45e-39
CDAN1	3.2e-06	0.994182	0.044	0.024	0.0865906
TTN	1.51e-05	0.99374	0.076	0.052	0.408706
MEIS1	3.33e-18	0.992845	0.125	0.063	9e-14
NSD2	4.43e-15	0.992095	0.111	0.058	1.2e-10
CHPF2	7.74e-16	0.990489	0.129	0.071	2.09e-11
MAGEE1	4.66e-11	0.990388	0.064	0.03	1.26e-06
SPRYD3	5.55e-56	0.990244	0.392	0.224	1.5e-51
CHPT1	5.76e-65	0.990206	0.438	0.255	1.56e-60
SMOX	3.13e-07	0.989699	0.05	0.027	0.00847491
SPARC	1.44e-287	0.988784	0.98	0.949	3.9e-283
NINJ2	0.000177759	0.988767	0.014	0.004	1
HEXA	3.38e-48	0.987499	0.342	0.195	9.15e-44
PTPDC1	7.32e-09	0.987349	0.071	0.039	0.000198221
KIF13B	3.18e-22	0.986931	0.176	0.096	8.62e-18
PPP1R1C	7.67e-05	0.986603	0.017	0.007	1
MESP1	6.23e-05	0.986004	0.02	0.008	1
CD58	2.02e-41	0.985867	0.293	0.16	5.47e-37
EPDR1	1.07e-57	0.985682	0.369	0.202	2.91e-53
MANBA	2.59e-17	0.985578	0.12	0.061	7.02e-13
TM7SF3	4.09e-34	0.985481	0.272	0.156	1.11e-29
PDLIM4	2.61e-73	0.984819	0.464	0.268	7.06e-69
HCFC1R1	5.99e-274	0.983639	0.878	0.721	1.62e-269
OLMALINC	0.000756279	0.98353	0.028	0.016	1
ANKS1A	4.38e-15	0.982229	0.143	0.084	1.19e-10
CASK	1.13e-38	0.981094	0.282	0.156	3.06e-34
USP9Y	1.47e-12	0.980678	0.114	0.066	3.97e-08
PAIP2B	3.68e-11	0.980023	0.079	0.041	9.96e-07
SGCB	2.19e-106	0.979328	0.649	0.448	5.94e-102
SLIT2	1.45e-13	0.979041	0.095	0.049	3.91e-09
HMOX1	0.00682942	0.978864	0.017	0.009	1
CACNB1	7e-08	0.978537	0.057	0.031	0.00189535
PCDHGA6	0.00116692	0.978052	0.033	0.02	1
CCDC125	7.92e-12	0.977925	0.091	0.049	2.14e-07
PXMP2	2.71e-37	0.97745	0.257	0.136	7.33e-33
BARD1	2.86e-36	0.977237	0.257	0.137	7.73e-32
HOTAIRM1	2.66e-08	0.976219	0.089	0.055	0.000720739
AL513217.1	0.032178	0.975758	0.014	0.009	1
SRC	2.08e-09	0.975	0.086	0.05	5.62e-05
AL162426.1	0.00281396	0.974877	0.014	0.007	1
GOLGA8R	0.0155427	0.974626	0.018	0.011	1
DUSP6	5.74e-27	0.974433	0.185	0.095	1.55e-22
GPR155	3.55e-17	0.974221	0.141	0.078	9.62e-13
SPIN3	5.29e-06	0.97383	0.054	0.032	0.143232
LRRC4C	0.000153743	0.973457	0.025	0.013	1
XKR6	0.00301749	0.973057	0.028	0.017	1
AL161421.1	5.33e-10	0.972311	0.057	0.026	1.44e-05
PHF13	9.75e-24	0.971275	0.162	0.082	2.64e-19
FAM227B	1.72e-08	0.970785	0.048	0.022	0.000464586
ICA1L	4.21e-15	0.970726	0.112	0.059	1.14e-10
SLC4A7	4.11e-40	0.970318	0.401	0.264	1.11e-35
OSGIN2	1.3e-13	0.969518	0.111	0.061	3.52e-09
UBE2H	1.65e-123	0.96914	0.728	0.538	4.47e-119
CENPV	1.7e-38	0.968347	0.272	0.147	4.6e-34
FBXO42	6.75e-24	0.968321	0.208	0.12	1.83e-19
MSX1	2.86e-22	0.967242	0.128	0.058	7.75e-18
MYOCD	1.37e-94	0.966295	0.596	0.366	3.72e-90
MIR181A2HG	0.00653114	0.963409	0.011	0.005	1
HK1	5.95e-46	0.963175	0.355	0.208	1.61e-41
ATAD2	1.63e-22	0.963095	0.18	0.098	4.41e-18
CD47	1.33e-96	0.962849	0.634	0.443	3.61e-92
CCDC150	0.026629	0.962159	0.015	0.009	1
KIF1B	1.75e-47	0.961413	0.414	0.266	4.73e-43
PRNP	1.54e-116	0.961219	0.673	0.453	4.17e-112
TSHZ3	5.21e-07	0.961199	0.053	0.029	0.01411
NDRG3	2.57e-37	0.959908	0.273	0.149	6.96e-33
ZNF793	3.61e-08	0.959706	0.097	0.062	0.000976673
SLC35G2	0.000570871	0.958807	0.031	0.018	1
ALS2CL	6.36e-05	0.958186	0.048	0.029	1
PTPN11	2.9e-92	0.957328	0.651	0.458	7.86e-88
DPY19L3	6.05e-09	0.95728	0.119	0.079	0.000163878
ATP8B2	1.52e-24	0.957003	0.25	0.157	4.13e-20
RECK	5.65e-29	0.956604	0.244	0.139	1.53e-24
KLHL17	0.019322	0.956365	0.02	0.013	1
RAB29	4.7e-20	0.955858	0.161	0.088	1.27e-15
PDIA3	9.47e-226	0.955301	0.86	0.73	2.56e-221
KIAA0391	0.0285789	0.955047	0.013	0.008	1
ST3GAL1	3.73e-14	0.955013	0.16	0.102	1.01e-09
TUFT1	1.02e-05	0.954571	0.019	0.007	0.276456
MYO18A	2.08e-06	0.954495	0.08	0.052	0.0563245
DACT3	3.58e-87	0.954362	0.504	0.276	9.7e-83
SLC3A1	0.0214097	0.953237	0.03	0.022	1
VPS13A	1.67e-46	0.952666	0.392	0.24	4.52e-42
CPED1	5.7e-133	0.949813	0.678	0.411	1.54e-128
RACGAP1	1.9e-05	0.948627	0.022	0.009	0.514283
LRP5	1.03e-23	0.948271	0.188	0.103	2.79e-19
BX537318.1	0.0129177	0.946894	0.017	0.01	1
ANKS3	1.13e-17	0.946656	0.147	0.082	3.07e-13
GPR82	0.168242	0.94653	0.014	0.01	1
RARRES1	0.000823857	0.946441	0.026	0.014	1
ACOT7	7.49e-14	0.945942	0.088	0.043	2.03e-09
ARSD	1.14e-11	0.945574	0.106	0.062	3.07e-07
CCDC146	3.38e-54	0.945565	0.335	0.175	9.16e-50
RBM5-AS1	0.300827	0.945515	0.011	0.009	1
CSPG4	2.46e-60	0.945475	0.403	0.219	6.65e-56
UBTD1	2.91e-13	0.945189	0.092	0.047	7.88e-09
TAB3	7.86e-05	0.945103	0.073	0.051	1
PAQR7	4.18e-06	0.944676	0.047	0.027	0.113238
RPS6KL1	5.5e-05	0.944421	0.043	0.026	1
UBE2L5	0.0175993	0.942619	0.01	0.005	1
ANKHD1-EIF4EBP3	0.233296	0.942305	0.01	0.008	1
TMED9	3.16e-110	0.942089	0.676	0.505	8.56e-106
PITPNB	3.05e-102	0.940895	0.643	0.445	8.27e-98
ASAH2B	0.00777481	0.940386	0.021	0.013	1
FSIP2	0.132333	0.93914	0.017	0.013	1
FOXC1	8.45e-179	0.938848	0.752	0.455	2.29e-174
GLS2	0.00566763	0.937721	0.014	0.007	1
GLT8D2	5.02e-53	0.937709	0.376	0.215	1.36e-48
MYH11	0	0.937142	0.996	0.723	0
LRPAP1	5.5e-173	0.936811	0.78	0.62	1.49e-168
C1orf74	0.100771	0.936607	0.01	0.006	1
NUDT14	1.2e-06	0.936243	0.045	0.023	0.0324171
TMEM74	0.000506269	0.936223	0.02	0.009	1
CD24	0.249986	0.935833	0.01	0.007	1
GNB3	0.00765445	0.935718	0.015	0.008	1
USO1	4.35e-74	0.935473	0.526	0.335	1.18e-69
MTURN	8.19e-64	0.933883	0.464	0.286	2.22e-59
AP3S1	9.84e-88	0.933756	0.584	0.39	2.66e-83
XPR1	2.54e-17	0.932732	0.142	0.078	6.88e-13
FAM178B	0.000466608	0.932584	0.024	0.013	1
AC073896.2	2.66e-08	0.932123	0.062	0.033	0.000719928
LIMS2	5.45e-90	0.931841	0.568	0.35	1.48e-85
CYB5R2	2.82e-09	0.931777	0.063	0.032	7.64e-05
AC103691.1	0.181681	0.931746	0.011	0.008	1
FLNA	0	0.929829	0.99	0.922	0
PACSIN3	8.3e-39	0.929754	0.278	0.15	2.25e-34
TMEM43	2.51e-90	0.929391	0.638	0.448	6.79e-86
SLC16A4	1.17e-27	0.928647	0.19	0.097	3.16e-23
LIMK1	0.00146157	0.928261	0.025	0.015	1
ZBTB47	8.04e-17	0.92775	0.137	0.075	2.18e-12
MTMR1	4.18e-07	0.927132	0.064	0.038	0.0113155
PRMT2	7.89e-154	0.926528	0.774	0.571	2.14e-149
FAM174B	0.000291465	0.926322	0.027	0.014	1
LRRK1	6.19e-05	0.925874	0.061	0.04	1
CYLD	1.14e-40	0.925665	0.372	0.235	3.08e-36
NCS1	2.01e-72	0.925377	0.405	0.206	5.44e-68
RWDD2A	9.31e-11	0.923592	0.092	0.052	2.52e-06
FOXC2-AS1	9.47e-08	0.923389	0.03	0.011	0.00256295
PKM	1.71e-165	0.922009	0.807	0.685	4.62e-161
BBC3	1.78e-09	0.920978	0.079	0.045	4.82e-05
SNAP23	3.34e-66	0.920718	0.49	0.308	9.03e-62
KLHL2	6.2e-09	0.919933	0.089	0.054	0.000167927
DUSP19	1.42e-21	0.919369	0.151	0.077	3.86e-17
AK9	1.85e-16	0.919136	0.135	0.074	4.99e-12
ZNF674	0.00351216	0.918821	0.027	0.017	1
KCNMB3	0.00152142	0.91803	0.034	0.022	1
ATP2A3	0.00115729	0.917922	0.042	0.028	1
ME1	1.23e-21	0.917042	0.151	0.077	3.33e-17
SLC30A1	1.63e-11	0.916507	0.112	0.067	4.41e-07
MROH1	2.96e-07	0.915427	0.059	0.033	0.00801837
SPATA6L	0.122274	0.91475	0.01	0.007	1
LRP8	0.00160777	0.913794	0.018	0.009	1
WFS1	3.78e-43	0.913488	0.306	0.166	1.02e-38
ZNF728	4.58e-06	0.913231	0.042	0.023	0.124095
NHLRC3	4.64e-27	0.913117	0.232	0.132	1.26e-22
NOXA1	0.000164472	0.91292	0.032	0.018	1
PLN	9.59e-263	0.912501	0.936	0.699	2.6e-258
NEXN	0	0.912374	0.967	0.908	0
S100A11	0	0.912221	0.942	0.907	0
C1orf216	4.75e-21	0.911983	0.154	0.081	1.29e-16
TMX4	7.54e-90	0.911534	0.594	0.384	2.04e-85
SH3BP4	8.17e-06	0.911218	0.073	0.048	0.221275
HEBP1	4.55e-78	0.909901	0.554	0.373	1.23e-73
LAMP1	1.05e-126	0.909229	0.739	0.565	2.85e-122
JPH2	3.36e-32	0.908828	0.207	0.102	9.09e-28
HPS5	3.64e-28	0.907849	0.214	0.117	9.84e-24
RAB4A	5.6e-71	0.907794	0.49	0.299	1.52e-66
CKMT2	3.42e-37	0.906751	0.252	0.129	9.26e-33
SUMO4	0.0117295	0.906008	0.018	0.011	1
C9orf116	0.0303255	0.905883	0.012	0.007	1
NIPA1	1.06e-06	0.905471	0.053	0.029	0.0285756
FAM83D	0.0022545	0.905436	0.022	0.013	1
VEGFB	1.16e-125	0.905087	0.725	0.574	3.14e-121
TNFRSF10B	2.89e-15	0.904794	0.105	0.053	7.83e-11
MRPL17	1.8e-37	0.904216	0.299	0.172	4.86e-33
TTTY14	4.44e-12	0.903656	0.093	0.049	1.2e-07
POFUT2	3.36e-15	0.902601	0.124	0.069	9.09e-11
MBNL1	1.64e-188	0.902544	0.925	0.82	4.43e-184
JPT2	1.5e-16	0.902317	0.153	0.089	4.07e-12
EXT2	2.45e-20	0.901472	0.207	0.127	6.64e-16
RAB3IP	4.37e-16	0.901024	0.103	0.049	1.18e-11
LTBP4	7.08e-107	0.900661	0.718	0.519	1.92e-102
RBMS3-AS3	1.02e-10	0.900191	0.066	0.032	2.76e-06
CAPRIN2	5.16e-21	0.900134	0.196	0.115	1.4e-16
SLC7A6	0.00265841	0.898897	0.039	0.027	1
CARHSP1	3.5e-58	0.898355	0.399	0.22	9.48e-54
RIMS3	1.89e-08	0.898167	0.076	0.044	0.000510375
STARD9	1.59e-13	0.897647	0.148	0.092	4.3e-09
PPP1R14B	1.28e-109	0.897632	0.698	0.536	3.45e-105
AL356275.1	0.000546954	0.897472	0.017	0.008	1
CCDC113	0.000209547	0.89589	0.044	0.028	1
GNG12	3.15e-117	0.895869	0.734	0.54	8.53e-113
PRPSAP1	4.54e-46	0.895669	0.374	0.22	1.23e-41
TIPARP-AS1	3.01e-06	0.895468	0.032	0.014	0.0815401
CBX1	3.13e-64	0.895309	0.524	0.348	8.47e-60
C11orf68	1.45e-38	0.895085	0.287	0.159	3.92e-34
SRP14-AS1	0.000170923	0.894319	0.029	0.016	1
EMC10	2.65e-54	0.894154	0.453	0.29	7.17e-50
CTTNBP2NL	7.55e-38	0.89354	0.335	0.202	2.04e-33
VPS41	9.48e-41	0.892936	0.34	0.204	2.57e-36
SPIN2A	0.0321169	0.892292	0.02	0.013	1
PTGES3L	6.01e-07	0.892122	0.042	0.02	0.0162814
NBPF1	8.42e-18	0.89152	0.149	0.083	2.28e-13
CALM1	0	0.89091	0.982	0.967	0
ARMC4	0.0247225	0.890575	0.011	0.006	1
EEF1E1	3.66e-44	0.890572	0.364	0.22	9.91e-40
KLF5	7.01e-05	0.890339	0.036	0.02	1
CARNS1	2.49e-07	0.889377	0.042	0.02	0.00672911
ARHGEF10L	4.06e-37	0.889089	0.271	0.145	1.1e-32
CTGF	5.19e-82	0.888987	0.831	0.663	1.4e-77
TMEM263	1.59e-56	0.888613	0.462	0.294	4.31e-52
ERICH2	0.00915101	0.887319	0.011	0.005	1
SDC4	6.93e-55	0.886009	0.371	0.202	1.87e-50
USP46-AS1	9.51e-08	0.885137	0.056	0.03	0.00257416
AC090152.1	0.0362668	0.884862	0.01	0.006	1
ZC3H12C	8.86e-07	0.884044	0.094	0.064	0.0239847
KIAA0930	2.86e-15	0.882973	0.127	0.071	7.75e-11
CTTN	1.18e-87	0.882719	0.621	0.436	3.2e-83
LRMDA	1.11e-27	0.88243	0.236	0.134	3.01e-23
PDXK	1.8e-24	0.882265	0.249	0.152	4.86e-20
NUDT10	2.03e-06	0.881769	0.034	0.016	0.0550316
TARS	1.36e-34	0.881398	0.322	0.199	3.69e-30
GNS	1.72e-25	0.881386	0.278	0.177	4.66e-21
PDCD6IP	7.05e-62	0.879678	0.513	0.337	1.91e-57
GPAM	2.3e-12	0.877519	0.114	0.066	6.22e-08
LINC00294	4.5e-07	0.877344	0.073	0.045	0.0121812
AC093827.5	0.00098857	0.876404	0.022	0.011	1
HAPLN3	7.43e-19	0.876072	0.167	0.096	2.01e-14
PNMA8B	0.0012861	0.875994	0.031	0.019	1
LYSMD4	8.42e-09	0.87575	0.072	0.04	0.000228007
ACOT9	1.97e-40	0.875478	0.388	0.253	5.34e-36
SLC22A15	0.0313703	0.874526	0.022	0.016	1
CPEB1	8.51e-05	0.874372	0.032	0.017	1
C3orf18	1.71e-05	0.87403	0.052	0.031	0.463515
FAM166B	8.11e-05	0.873969	0.018	0.007	1
AC026401.3	0.0148482	0.873684	0.022	0.014	1
PLA2G16	3.11e-83	0.873418	0.615	0.438	8.41e-79
PTGIR	3.24e-35	0.873042	0.325	0.198	8.76e-31
PHLDA3	3.07e-55	0.873033	0.441	0.271	8.32e-51
CPLANE2	6.23e-05	0.872836	0.021	0.009	1
FAM118A	1.22e-21	0.872459	0.206	0.122	3.31e-17
TMEM121	6.12e-06	0.872292	0.044	0.024	0.165775
GYPC	2.72e-148	0.872096	0.753	0.559	7.36e-144
GADD45G	1.37e-41	0.871807	0.315	0.174	3.72e-37
AGA	1.51e-36	0.870197	0.22	0.104	4.09e-32
BLOC1S5	4.59e-25	0.870161	0.219	0.126	1.24e-20
TIGD7	2.83e-08	0.869614	0.067	0.037	0.000766694
CEP170B	1.19e-08	0.869267	0.074	0.042	0.000323191
GPR107	2.58e-12	0.869003	0.165	0.109	6.98e-08
RAI2	2.58e-15	0.868876	0.148	0.088	6.99e-11
ALDH18A1	3.46e-08	0.866162	0.094	0.059	0.00093749
BTN2A2	9.65e-12	0.866132	0.095	0.052	2.61e-07
SVEP1	0.000130187	0.864584	0.038	0.022	1
ACOX3	5.01e-13	0.864352	0.099	0.052	1.36e-08
HADH	8.39e-44	0.864135	0.382	0.235	2.27e-39
FBXL7	2.24e-11	0.863669	0.102	0.059	6.08e-07
SMC5-AS1	0.02075	0.863153	0.015	0.009	1
TSPOAP1	0.000818379	0.862876	0.032	0.02	1
LSMEM1	0.00309543	0.862197	0.024	0.015	1
NUDT17	5.67e-09	0.861084	0.044	0.019	0.000153582
AC079315.1	0.188921	0.860912	0.01	0.007	1
CARD19	2.98e-45	0.860798	0.387	0.239	8.07e-41
AGO4	5.63e-13	0.859408	0.147	0.093	1.52e-08
AC037459.3	0.358288	0.859052	0.015	0.012	1
CYFIP2	4e-70	0.858281	0.359	0.165	1.08e-65
GOLGA3	6.1e-39	0.858213	0.386	0.249	1.65e-34
TCP11L1	5.38e-11	0.858024	0.118	0.073	1.46e-06
PEX12	0.000724376	0.857911	0.027	0.016	1
LRRK2	1.17e-15	0.857786	0.18	0.113	3.16e-11
SPIN4	4.44e-07	0.857553	0.059	0.033	0.0120262
PPFIA4	0.00209309	0.857165	0.016	0.008	1
UBL4A	5.22e-29	0.856889	0.257	0.149	1.41e-24
CMPK1	1.35e-96	0.856567	0.683	0.51	3.64e-92
DUSP3	9.87e-44	0.856426	0.375	0.226	2.67e-39
DENND2C	2.82e-08	0.856183	0.084	0.051	0.000762604
CTF1	1.14e-18	0.855963	0.14	0.074	3.09e-14
PRX	0.0540864	0.85596	0.018	0.013	1
DEXI	7.02e-57	0.855506	0.45	0.28	1.9e-52
RPGRIP1L	3.67e-06	0.85498	0.073	0.047	0.0994121
MBLAC1	2.89e-06	0.854264	0.053	0.03	0.0781516
C8orf48	8.17e-06	0.854057	0.041	0.022	0.221063
CERCAM	4.99e-27	0.853446	0.218	0.12	1.35e-22
ASB1	9.26e-15	0.853243	0.15	0.091	2.51e-10
FGD5	0.209151	0.852144	0.021	0.017	1
DTWD2	1.12e-09	0.851948	0.072	0.038	3.03e-05
SYNM	1.66e-156	0.851398	0.63	0.301	4.5e-152
MIR34AHG	0.0107003	0.851286	0.028	0.019	1
NACAD	1.83e-06	0.851283	0.063	0.038	0.0495725
LNPEP	6.86e-51	0.851058	0.52	0.363	1.86e-46
DESI2	1.43e-56	0.850454	0.507	0.344	3.87e-52
IL18	0.213625	0.849487	0.01	0.007	1
TMEM30B	3.17e-19	0.848882	0.205	0.128	8.57e-15
SLITRK5	0.00359327	0.848234	0.011	0.004	1
DHX34	0.09433	0.847981	0.016	0.012	1
AL139353.1	9.52e-05	0.847814	0.029	0.015	1
DACT1	2.78e-18	0.847766	0.226	0.147	7.53e-14
SMAD9	1.06e-35	0.847572	0.347	0.219	2.88e-31
COL16A1	1.05e-30	0.847022	0.274	0.16	2.85e-26
FAM184B	0.128066	0.846144	0.032	0.026	1
GALM	1.51e-14	0.845784	0.151	0.092	4.09e-10
ZNF69	6.36e-05	0.844826	0.032	0.017	1
ISOC1	1.86e-14	0.844701	0.114	0.061	5.04e-10
SLC25A14	2.19e-08	0.844563	0.07	0.04	0.000593137
DAPK3	1.13e-52	0.842878	0.447	0.286	3.06e-48
PYGO1	6.1e-12	0.842723	0.123	0.074	1.65e-07
FUT4	0.000476508	0.841849	0.049	0.033	1
RNF144B	0.00471057	0.841226	0.015	0.007	1
SCMH1	5.25e-22	0.840753	0.18	0.099	1.42e-17
NOTCH2NL	1.59e-09	0.839914	0.117	0.075	4.3e-05
PCBP4	1.94e-29	0.839447	0.228	0.124	5.25e-25
FAM219B	1.04e-27	0.838958	0.24	0.139	2.83e-23
OGT	8.92e-30	0.838781	0.347	0.229	2.42e-25
GNPNAT1	1.23e-20	0.838604	0.215	0.133	3.33e-16
CCND2	1.73e-76	0.838107	0.622	0.428	4.68e-72
INPP1	4.29e-28	0.837748	0.249	0.145	1.16e-23
GNAQ	1.9e-35	0.83742	0.414	0.286	5.16e-31
GSTP1	0	0.83692	0.947	0.943	0
FRMD6	3.67e-27	0.836665	0.251	0.149	9.94e-23
KDM4C	1.98e-06	0.836313	0.108	0.078	0.0536529
UHRF1BP1L	1.62e-23	0.836256	0.263	0.17	4.39e-19
GABARAPL2	2.25e-184	0.835892	0.832	0.741	6.1e-180
NANS	7.84e-32	0.835721	0.277	0.163	2.12e-27
PDE10A	0.212824	0.835451	0.025	0.021	1
CCDC102A	1.86e-25	0.835045	0.202	0.111	5.04e-21
NMRK1	3.86e-26	0.834996	0.262	0.162	1.05e-21
HSD17B12	2.46e-107	0.834637	0.721	0.549	6.67e-103
NAPEPLD	5.38e-12	0.834264	0.12	0.072	1.46e-07
C5orf30	0.000192389	0.8339	0.039	0.023	1
KCNK17	4.02e-38	0.833636	0.241	0.116	1.09e-33
SEMA4F	0.000209074	0.833496	0.027	0.014	1
TLN1	1.17e-295	0.833262	0.969	0.931	3.17e-291
ABHD17C	0.0715827	0.832458	0.01	0.006	1
WWTR1	1.95e-73	0.832453	0.639	0.467	5.28e-69
KIFC3	7.63e-12	0.832313	0.112	0.066	2.07e-07
ZNF382	3.77e-05	0.83186	0.033	0.017	1
AC097634.1	0.013582	0.831296	0.02	0.012	1
EVC2	6.4e-06	0.831162	0.068	0.044	0.17325
BRI3	3e-182	0.831059	0.831	0.735	8.13e-178
RBPMS-AS1	0.000549198	0.830963	0.032	0.019	1
SARAF	7.8e-161	0.830772	0.806	0.694	2.11e-156
PHF19	3.43e-26	0.83075	0.228	0.131	9.3e-22
CACYBP	6.54e-71	0.83041	0.544	0.359	1.77e-66
NIPSNAP3A	1.77e-31	0.830321	0.269	0.155	4.79e-27
CCSER2	7.34e-89	0.830254	0.651	0.455	1.99e-84
GPSM2	4.76e-11	0.829881	0.16	0.109	1.29e-06
AP002387.2	6.5e-15	0.829276	0.095	0.046	1.76e-10
RNF11	1.03e-71	0.828982	0.601	0.428	2.78e-67
RBM44	0.390034	0.828108	0.011	0.009	1
TACC2	9.02e-22	0.828062	0.248	0.159	2.44e-17
AFAP1	1.74e-14	0.827235	0.169	0.107	4.71e-10
ST20	7.61e-07	0.827189	0.053	0.029	0.0206074
MAPK7	4.18e-10	0.826773	0.091	0.052	1.13e-05
CNN1	5.61e-256	0.826667	0.911	0.667	1.52e-251
USP27X	9.31e-07	0.825722	0.056	0.031	0.0252105
CDKN2A	0.000220557	0.825531	0.02	0.009	1
CRYZ	3.09e-23	0.825515	0.189	0.103	8.35e-19
FAM160B1	1.53e-17	0.825325	0.218	0.142	4.15e-13
STOX2	3.25e-07	0.825298	0.053	0.028	0.00879484
GLG1	6.85e-74	0.823968	0.648	0.48	1.85e-69
SLC25A40	1.55e-06	0.823358	0.063	0.038	0.0419305
NDEL1	5.38e-25	0.823258	0.271	0.17	1.46e-20
ZDHHC9	9.69e-05	0.823199	0.047	0.029	1
[truncated: 12,147 more rows]

## Sheet: hVSMC1_vs_hVSMC2.LDS_ClueGO_
HUMAN TRANSCRIPTS USED FOR CLUEGO ANALYSIS
Pct >0.2 in higher expressing sample, Adj P<0.05, Abs FC >2.5
Upregulated in HUMAN LDS VSMC1 v LDS VSMC2
#gene name	p_val	avg_log2FC	pct.1	pct.2	p_val_adj
SFRP1	0	5.24728	0.54	0.04	0
CST6	3.76e-216	5.08222	0.333	0.016	1.02e-211
SCX	0	4.94538	0.508	0.032	0
LINC02269	3.52e-160	4.77478	0.258	0.01	9.54e-156
NOX4	3.85e-187	4.72731	0.296	0.013	1.04e-182
FAM180A	1.42e-219	4.72213	0.338	0.017	3.85e-215
FAM19A5	2.37e-156	4.6445	0.258	0.013	6.41e-152
CRISPLD1	0	4.6122	0.669	0.049	0
CDH2	0	4.56396	0.499	0.031	0
HAPLN1	2.52e-137	4.54616	0.232	0.012	6.82e-133
C5orf46	2.54e-163	4.52431	0.275	0.019	6.89e-159
COL8A1	0	4.44237	0.702	0.078	0
ATRNL1	1.76e-170	4.43282	0.281	0.016	4.77e-166
PCDH11X	1.32e-120	4.42511	0.212	0.013	3.58e-116
MTUS2	1.76e-207	4.42225	0.327	0.019	4.76e-203
GSG1L	8.68e-142	4.40111	0.241	0.014	2.35e-137
DMKN	9.77e-250	4.39579	0.375	0.021	2.65e-245
CYTL1	3.08e-146	4.37997	0.291	0.048	8.34e-142
GRIA2	0	4.35708	0.465	0.029	0
SUGCT	0	4.32638	0.626	0.06	0
FGL2	0	4.31272	0.913	0.135	0
SOST	3.5e-137	4.31026	0.239	0.016	9.48e-133
VCAN	0	4.27122	0.856	0.178	0
SPINT2	0	4.24561	0.878	0.133	0
FBLN5	0	4.24551	0.838	0.102	0
RTN1	0	4.20758	0.535	0.045	0
CLMP	0	4.18611	0.493	0.035	0
SLC25A34-AS1	2.79e-134	4.15117	0.234	0.016	7.55e-130
MFAP2	7.66e-133	4.14208	0.233	0.016	2.07e-128
MYOZ2	5.61e-164	4.13767	0.284	0.025	1.52e-159
FIBIN	0	4.13433	0.743	0.092	0
GJA1	0	4.12107	0.656	0.067	0
ITGBL1	0	4.06931	0.688	0.076	0
OCIAD2	2.56e-298	4.04405	0.436	0.032	6.93e-294
ANXA3	1.38e-119	4.01472	0.21	0.012	3.75e-115
HMCN1	0	3.99934	0.651	0.071	0
MRAP2	0	3.99245	0.544	0.043	0
GXYLT2	9.17e-189	3.95482	0.315	0.024	2.48e-184
TPH1	2.39e-242	3.94026	0.39	0.039	6.46e-238
PDGFD	4.88e-234	3.92954	0.374	0.032	1.32e-229
PCDH7	0	3.92122	0.871	0.103	0
MYH10	0	3.91584	0.985	0.402	0
TC2N	0	3.90235	0.503	0.041	0
SCRG1	0	3.85937	0.76	0.093	0
OSR1	3.71e-188	3.78547	0.325	0.032	1.01e-183
OMD	3.42e-296	3.76231	0.46	0.052	9.27e-292
NOV	0	3.75011	0.954	0.255	0
PLXDC2	0	3.6941	0.737	0.097	0
ACADL	5.5e-195	3.68779	0.331	0.03	1.49e-190
KCNK15	4.61e-124	3.6578	0.234	0.024	1.25e-119
LTBP2	0	3.65648	0.697	0.117	0
TNFRSF11B	1.56e-205	3.65585	0.405	0.081	4.22e-201
SEMA3C	3.58e-136	3.64317	0.247	0.022	9.69e-132
BASP1	7.23e-225	3.63978	0.366	0.032	1.96e-220
PDGFRA	5.21e-263	3.62492	0.421	0.044	1.41e-258
ADSSL1	3.36e-125	3.62256	0.24	0.028	9.1e-121
TFPI2	3.98e-117	3.61888	0.226	0.025	1.08e-112
PART1	7.72e-110	3.61114	0.204	0.017	2.09e-105
CPXM2	0	3.59844	0.728	0.11	0
TRIM36	1.52e-117	3.59506	0.218	0.019	4.11e-113
LIMCH1	0	3.57446	0.808	0.139	0
LPAR1	6.38e-173	3.53343	0.31	0.034	1.73e-168
SLC41A2	1.11e-171	3.52825	0.302	0.029	3.01e-167
SERTAD4-AS1	2.76e-305	3.46495	0.47	0.054	7.46e-301
CTHRC1	0	3.46409	0.64	0.106	0
PDE8B	4.32e-126	3.45641	0.246	0.031	1.17e-121
RAMP1	0	3.42195	0.956	0.335	0
HAND2-AS1	2.14e-257	3.41934	0.427	0.054	5.78e-253
MYEF2	0	3.40553	0.536	0.069	0
PID1	0	3.38832	0.542	0.073	0
KCNK6	3.16e-145	3.36447	0.272	0.031	8.54e-141
ALCAM	0	3.35861	0.722	0.129	0
ST6GAL2	0	3.35108	0.504	0.068	0
COL8A2	5.5e-139	3.34072	0.256	0.025	1.49e-134
FRMD4B	7.42e-175	3.33795	0.319	0.038	2.01e-170
TSTD1	5.11e-288	3.33638	0.462	0.062	1.38e-283
ERG	1.89e-282	3.28389	0.453	0.052	5.12e-278
HRCT1	4.72e-132	3.27079	0.258	0.033	1.28e-127
SGCD	1.57e-304	3.26163	0.485	0.062	4.24e-300
HSPB7	0	3.25862	0.821	0.195	0
PCOLCE2	4.73e-146	3.25129	0.3	0.051	1.28e-141
MEG3	5.3e-126	3.25024	0.248	0.031	1.44e-121
ERBB4	1.34e-153	3.24767	0.291	0.035	3.62e-149
TCEAL2	0	3.23011	0.644	0.098	0
MPP6	1.27e-110	3.19668	0.228	0.032	3.45e-106
COL4A4	1.15e-96	3.19273	0.2	0.025	3.1e-92
AFDN	5.51e-155	3.14623	0.296	0.039	1.49e-150
AP002884.1	2.05e-263	3.12667	0.448	0.068	5.54e-259
DUSP26	6.8e-255	3.12237	0.428	0.055	1.84e-250
LMO7	0	3.0951	0.562	0.083	0
TBXA2R	6.17e-104	3.06746	0.209	0.024	1.67e-99
MMP2	2.2e-206	3.05646	0.388	0.064	5.95e-202
SEMA3D	1.49e-97	3.05337	0.21	0.031	4.04e-93
NPTX2	2.7e-104	3.05252	0.208	0.023	7.32e-100
WISP2	1.3e-249	3.04305	0.483	0.115	3.52e-245
PTGIS	0	3.02318	0.654	0.099	0
NPR1	8.34e-252	3.01981	0.442	0.071	2.26e-247
ITGA10	8.12e-226	3.01203	0.421	0.075	2.2e-221
EFEMP1	0	2.99645	0.773	0.221	0
HAND2	0	2.99642	0.585	0.11	0
MRC2	9.86e-154	2.97114	0.301	0.042	2.67e-149
THBS2	0	2.94764	0.641	0.147	0
BTC	1.75e-143	2.94175	0.295	0.049	4.75e-139
FAM198B	0	2.86068	0.685	0.135	0
CDH13	0	2.83778	0.663	0.149	0
SHTN1	4.73e-96	2.80929	0.22	0.038	1.28e-91
SLC22A3	0	2.80104	0.576	0.116	0
ITGA11	1.55e-301	2.79078	0.545	0.121	4.2e-297
ZNF385D	0	2.7753	0.668	0.146	0
TSPAN2	0	2.74569	0.596	0.118	0
COL21A1	0	2.74415	0.747	0.247	0
TLN2	7.42e-140	2.74264	0.306	0.058	2.01e-135
OGN	0	2.74185	0.934	0.31	0
ITGA8	0	2.73844	0.977	0.438	0
ALDH1B1	1.87e-291	2.72012	0.521	0.113	5.07e-287
PRUNE2	0	2.70353	0.749	0.176	0
UCHL1	6.04e-105	2.67917	0.265	0.064	1.64e-100
MGP	0	2.66968	0.997	0.984	0
ATP6AP1L	3.05e-95	2.66743	0.214	0.035	8.24e-91
PAM	0	2.66041	0.839	0.301	0
LTBP1	0	2.6556	0.943	0.401	0
IL13RA2	1.8e-86	2.65431	0.228	0.057	4.88e-82
FN1	0	2.6397	0.966	0.622	0
LINC00982	5.27e-150	2.60387	0.33	0.067	1.43e-145
BHLHE41	1.28e-118	2.60311	0.259	0.045	3.47e-114
CNTN1	2.07e-130	2.59474	0.304	0.066	5.59e-126
CLU	0	2.5898	0.981	0.592	0
COL13A1	9.54e-109	2.57298	0.243	0.041	2.58e-104
AKR1C2	3.74e-96	2.56921	0.25	0.061	1.01e-91
RHOD	1.89e-137	2.56733	0.302	0.059	5.11e-133
IGFBP2	0	2.55575	0.962	0.533	0
PFKFB3	9.76e-111	2.55016	0.27	0.06	2.64e-106
AQP1	0	2.54505	0.792	0.249	0
THRB	6.66e-279	2.52879	0.541	0.14	1.8e-274
CES1	1.98e-271	2.51959	0.525	0.137	5.35e-267
BEX5	5.72e-108	2.50517	0.244	0.043	1.55e-103
PERP	7.42e-264	2.50499	0.505	0.118	2.01e-259
CD200	1.25e-99	2.50444	0.247	0.055	3.38e-95
Downregulated in HUMAN LDS VSMC1 v LDS VSMC2
#gene name	p_val	avg_log2FC	pct.1	pct.2	p_val_adj
WNT6	0	-10.6264	0	0.217	0
CCL8	0	-8.76686	0.002	0.273	0
PTGER1	0	-8.64673	0.002	0.257	0
CCL21	0	-8.49873	0.009	0.436	0
COX4I2	0	-8.39861	0.005	0.693	0
STEAP4	0	-8.3799	0.017	0.673	0
ADRA2A	0	-8.22304	0.002	0.379	0
CCL19	0	-8.22227	0.013	0.372	0
FABP4	0	-8.17461	0.024	0.839	0
FAM162B	0	-8.03604	0.004	0.561	0
SUCNR1	0	-8.03526	0.002	0.225	0
RASD1	0	-7.9	0.015	0.601	0
APOE	0	-7.84982	0.038	0.689	0
IL6	0	-7.79458	0.005	0.224	0
CD36	0	-7.61118	0.009	0.473	0
TMEM176A	0	-7.6052	0.006	0.434	0
CYGB	0	-7.52082	0.004	0.331	0
NCKAP5	0	-7.48028	0.003	0.42	0
ADAMTS4	0	-7.4415	0.008	0.523	0
CNGA1	0	-7.41433	0.003	0.21	0
CHRDL1	0	-7.28083	0.004	0.314	0
TMEM176B	0	-7.24219	0.007	0.458	0
SCN4B	0	-7.17582	0.003	0.331	0
ADAMTS5	0	-7.1517	0.003	0.22	0
ADGRF5	0	-7.0993	0.008	0.512	0
EDNRB	0	-7.02973	0.005	0.452	0
AVPR1A	0	-6.93363	0.008	0.44	0
MYC	0	-6.8735	0.022	0.59	0
LINC00924	0	-6.78246	0.006	0.348	0
SSTR2	0	-6.77236	0.006	0.424	0
GGT5	0	-6.76377	0.015	0.577	0
CRISPLD2	0	-6.69991	0.014	0.671	0
TCIM	0	-6.68831	0.021	0.554	0
EBF2	0	-6.65976	0.004	0.458	0
COLEC11	0	-6.60768	0.005	0.246	0
PLPPR4	0	-6.57932	0.004	0.279	0
NRARP	0	-6.54666	0.003	0.266	0
FABP5	0	-6.42475	0.019	0.619	0
OAF	0	-6.39753	0.005	0.277	0
FXYD6	0	-6.39631	0.007	0.408	0
RERGL	0	-6.30814	0.029	0.372	0
HOPX	0	-6.27491	0.01	0.341	0
TPPP3	0	-6.25342	0.011	0.548	0
MT1A	0	-6.20898	0.06	0.557	0
CCL2	0	-6.18853	0.067	0.569	0
FGF10	0	-6.08839	0.005	0.244	0
NEURL1B	0	-5.87091	0.011	0.503	0
APOLD1	0	-5.86202	0.032	0.612	0
IFITM1	0	-5.83485	0.029	0.537	0
RGS6	0	-5.80885	0.003	0.239	0
NRIP2	0	-5.79388	0.004	0.201	0
HIC1	0	-5.73943	0.007	0.295	0
ODF3B	0	-5.7321	0.007	0.236	0
DOCK8	0	-5.6995	0.006	0.287	0
LIN7A	0	-5.68604	0.007	0.289	0
ATP1B2	0	-5.64693	0.01	0.424	0
LINC02381	0	-5.64347	0.007	0.266	0
CLSTN2	0	-5.54494	0.014	0.37	0
CFD	0	-5.49832	0.046	0.288	0
ENPEP	0	-5.49328	0.018	0.454	0
LGI4	0	-5.48563	0.036	0.662	0
GUCY1A2	0	-5.48212	0.015	0.457	0
PPARG	0	-5.45481	0.008	0.314	0
ANKRD29	0	-5.42299	0.019	0.558	0
NTRK2	0	-5.42105	0.04	0.774	0
SOCS3	0	-5.36566	0.043	0.483	0
ARHGAP15	0	-5.36105	0.018	0.452	0
CPM	0	-5.32184	0.015	0.293	0
SLC7A2	0	-5.31265	0.044	0.74	0
C7	0	-5.31109	0.019	0.304	0
FGF7	0	-5.30204	0.059	0.61	0
SERPINF1	0	-5.18699	0.019	0.432	0
NR4A3	0	-5.16102	0.021	0.43	0
COL5A3	0	-5.12228	0.007	0.21	0
RGS16	0	-5.06921	0.029	0.441	0
CDH6	0	-5.00638	0.023	0.523	0
IGFBP4	0	-5.00218	0.132	0.874	0
SYTL2	0	-4.99037	0.042	0.683	0
NGFR	0	-4.98127	0.011	0.213	0
RCSD1	0	-4.94468	0.013	0.339	0
CLMN	0	-4.89364	0.032	0.579	0
CCDC102B	0	-4.8442	0.054	0.566	0
TEX41	0	-4.80925	0.012	0.253	0
ANGPTL4	0	-4.78771	0.013	0.273	0
ADGRA2	0	-4.73855	0.015	0.378	0
NR4A1	0	-4.71087	0.179	0.857	0
SLC2A3	0	-4.60913	0.032	0.47	0
CYP7B1	0	-4.58883	0.02	0.351	0
AGT	0	-4.55385	0.049	0.557	0
KRT18	0	-4.48343	0.009	0.213	0
ARHGAP42	0	-4.45695	0.025	0.41	0
EGFLAM	0	-4.42917	0.026	0.349	0
SH3BP2	0	-4.36995	0.014	0.249	0
PLAC9	0	-4.33541	0.208	0.946	0
LAMA3	0	-4.28786	0.011	0.236	0
MT2A	0	-4.2836	0.577	0.958	0
COL25A1	0	-4.26852	0.017	0.232	0
CHRD	0	-4.25722	0.019	0.306	0
GFRA1	0	-4.22743	0.013	0.226	0
LINC01197	0	-4.22738	0.055	0.541	0
RBPMS2	0	-4.19286	0.025	0.306	0
EPHA3	0	-4.15353	0.017	0.253	0
CALCRL	0	-4.14521	0.03	0.406	0
PDK4	0	-4.13398	0.145	0.655	0
NR4A2	0	-4.13168	0.047	0.49	0
MT1F	0	-4.12839	0.026	0.318	0
MDK	0	-4.12532	0.048	0.359	0
RALGPS2	0	-4.10965	0.021	0.257	0
ADGRL3	0	-4.10468	0.036	0.372	0
IGFBP5	0	-4.07462	0.528	0.977	0
GJA4	0	-4.05481	0.125	0.656	0
TP53I11	0	-4.05168	0.024	0.301	0
FBXL13	0	-4.01903	0.015	0.21	0
PHLDA1	0	-3.99393	0.126	0.579	0
TYMP	0	-3.98366	0.03	0.351	0
AGTR1	0	-3.91922	0.032	0.258	0
ADCY3	0	-3.91722	0.059	0.562	0
FHL5	0	-3.90716	0.111	0.747	0
GALNT16	0	-3.88239	0.016	0.213	0
TNC	0	-3.85201	0.046	0.304	0
SCN3A	0	-3.82652	0.024	0.239	0
PGF	0	-3.79279	0.075	0.446	0
CEBPD	0	-3.77479	0.46	0.927	0
BMP2	0	-3.76805	0.057	0.375	0
PLAU	0	-3.65689	0.042	0.283	0
FOSB	0	-3.6444	0.062	0.512	0
SOX13	0	-3.60877	0.019	0.208	0
CSF1	0	-3.60621	0.03	0.317	0
NFASC	0	-3.59379	0.036	0.369	0
ADAMTS1	0	-3.56489	0.442	0.925	0
MT1M	0	-3.56272	0.36	0.734	0
LAMA4	0	-3.54329	0.063	0.503	0
BTG2	0	-3.53979	0.256	0.796	0
PRKAR2B	0	-3.51274	0.046	0.307	0
PROCR	0	-3.48989	0.08	0.432	0
CTSC	0	-3.46461	0.152	0.491	0
ABCC9	0	-3.45678	0.144	0.643	0
ATF3	0	-3.45651	0.143	0.634	0
PAG1	0	-3.44703	0.025	0.23	0
NR2F2	0	-3.42905	0.405	0.943	0
TCF21	0	-3.39103	0.061	0.334	0
PODN	0	-3.39031	0.038	0.33	0
JUNB	0	-3.38648	0.549	0.918	0
SUSD2	0	-3.3843	0.033	0.262	0
NDUFA4L2	0	-3.35913	0.092	0.726	0
MEOX2	0	-3.35723	0.058	0.41	0
KCNJ8	0	-3.35286	0.091	0.452	0
FOS	0	-3.27771	0.299	0.898	0
EDNRA	0	-3.25531	0.115	0.625	0
EPHX1	0	-3.21715	0.224	0.74	0
KLHL23	0	-3.20467	0.11	0.54	0
NT5DC2	0	-3.15461	0.085	0.485	0
HRC	0	-3.1477	0.038	0.32	0
PEAR1	0	-3.14714	0.037	0.291	0
SH3KBP1	0	-3.1003	0.084	0.456	0
MT1E	0	-3.08169	0.438	0.843	0
GRIN2A	2.64e-271	-3.06496	0.029	0.213	7.14e-267
CXCL12	0	-3.0567	0.275	0.797	0
ZNF331	1.98e-241	-3.05084	0.159	0.423	5.36e-237
THY1	0	-3.03386	0.114	0.43	0
TBX2	0	-3.02206	0.147	0.578	0
IL32	0	-3.00775	0.065	0.37	0
GADD45B	0	-3.00542	0.553	0.843	0
ZFP36	0	-2.99761	0.477	0.829	0
APOL6	0	-2.99146	0.049	0.294	0
C2orf40	0	-2.98151	0.287	0.811	0
FAM13C	0	-2.97308	0.161	0.585	0
CSRNP1	0	-2.95275	0.075	0.353	0
ANGPT2	0	-2.94502	0.143	0.634	0
SPRY2	0	-2.93462	0.131	0.54	0
TLE2	1.04e-303	-2.93228	0.04	0.257	2.83e-299
GUCY1B1	0	-2.93183	0.172	0.67	0
RGS7BP	8.93e-227	-2.92872	0.036	0.208	2.42e-222
THBS1	3.71e-263	-2.90353	0.128	0.398	1e-258
PODXL2	6.51e-228	-2.88423	0.036	0.211	1.76e-223
KCNE4	0	-2.8713	0.167	0.522	0
ISYNA1	0	-2.86377	0.218	0.745	0
HES4	0	-2.85318	0.321	0.824	0
TIMP3	0	-2.85257	0.696	0.986	0
C20orf27	0	-2.83129	0.174	0.578	0
NFIL3	8.52e-289	-2.80108	0.119	0.396	2.31e-284
PLTP	0	-2.79731	0.067	0.36	0
SNAI2	1.83e-257	-2.79655	0.055	0.267	4.94e-253
ESAM	0	-2.79301	0.134	0.674	0
HGF	0	-2.78277	0.11	0.401	0
FRMD3	2.13e-304	-2.78133	0.078	0.338	5.75e-300
CSRNP3	1.54e-285	-2.77959	0.049	0.27	4.18e-281
SRPX	8.34e-286	-2.7597	0.092	0.35	2.26e-281
TBX2-AS1	3.77e-296	-2.75114	0.102	0.373	1.02e-291
NID1	0	-2.73799	0.067	0.368	0
TBX3	1.14e-224	-2.73222	0.042	0.222	3.07e-220
RBM24	1.42e-195	-2.7319	0.045	0.214	3.83e-191
ZEB2	0	-2.72617	0.395	0.876	0
NRP1	0	-2.72004	0.162	0.633	0
SEMA5A	0	-2.70738	0.1	0.443	0
NPY1R	8.19e-252	-2.69935	0.065	0.286	2.22e-247
A1BG	0	-2.69737	0.062	0.352	0
NOTCH3	0	-2.68042	0.422	0.904	0
MAFB	9.15e-297	-2.65021	0.076	0.332	2.48e-292
JUN	0	-2.64549	0.583	0.892	0
MOCS1	2.37e-281	-2.61839	0.06	0.292	6.41e-277
SLIT3	0	-2.61147	0.275	0.763	0
CAVIN2	0	-2.60998	0.094	0.413	0
PHLDA2	6.64e-167	-2.60943	0.119	0.321	1.8e-162
SNRK	0	-2.56344	0.096	0.408	0
EGR1	0	-2.53186	0.315	0.745	0

## Sheet: ClueGO Results
ID	Term	Ontology Source	Term PValue	Term PValue Corrected with Bonferroni	Group PValue	Group PValue Corrected with Bonferroni	GOLevels	GOGroups	% Associated Genes	Nr. Genes	Cluster	Genes Cluster #1	Genes Cluster #2	%Genes Cluster #1	%Genes Cluster #2	%Genes Cluster #1.adjusted.to.input.list.size	%Genes Cluster #2.adjusted.to.input.list.size	Associated Genes Found
CUSTOM:HALLMARK_APOPTOSIS_6	HALLMARK_APOPTOSIS	CUSTOM_h.all.v2023.2.Hs.symbols.gmt_09.04.2024	1.11129e-05	0.00316717	1.11129e-05	0.000300047	[-1]	Group00	8.07453	13	Specific for Cluster #2	[CLU, MMP2]	[ATF3, AVPR1A, BMP2, BTG2, GADD45B, HGF, IL6, JUN, KRT18, PLPPR4, TIMP3]	15.3846	84.6154	17.2154	82.7846	[ATF3, AVPR1A, BMP2, BTG2, CLU, GADD45B, HGF, IL6, JUN, KRT18, MMP2, PLPPR4, TIMP3]
CUSTOM:HALLMARK_EPITHELIAL_MESENCHYMAL_TRANSITION_13	HALLMARK_EPITHELIAL_MESENCHYMAL_TRANSITION	CUSTOM_h.all.v2023.2.Hs.symbols.gmt_09.04.2024	7.37927e-21	2.10309e-18	7.37927e-21	1.9924e-19	[-1]	Group01	16	32	None Specific Cluster	[BASP1, CDH2, COL8A2, CTHRC1, FBLN5, FN1, GJA1, IGFBP2, MGP, MMP2, PCOLCE2, SFRP1, SGCD, TFPI2, THBS2, TNFRSF11B, VCAN]	[CDH6, COL5A3, CXCL12, GADD45B, IGFBP4, IL32, IL6, JUN, LAMA3, SLIT3, SNAI2, THBS1, THY1, TIMP3, TNC]	53.125	46.875	56.4507	43.5493	[BASP1, CDH2, CDH6, COL5A3, COL8A2, CTHRC1, CXCL12, FBLN5, FN1, GADD45B, GJA1, IGFBP2, IGFBP4, IL32, IL6, JUN, LAMA3, MGP, MMP2, PCOLCE2, SFRP1, SGCD, SLIT3, SNAI2, TFPI2, THBS1, THBS2, THY1, TIMP3, TNC, TNFRSF11B, VCAN]
CUSTOM:HALLMARK_UV_RESPONSE_DN_46	HALLMARK_UV_RESPONSE_DN	CUSTOM_h.all.v2023.2.Hs.symbols.gmt_09.04.2024	1.76464e-05	0.00502921	1.76464e-05	0.000476452	[-1]	Group02	8.33333	12	None Specific Cluster	[EFEMP1, FBLN5, GJA1, LPAR1, LTBP1]	[IGFBP5, MT1E, MYC, NRP1, PPARG, PRKAR2B, SNAI2]	41.6667	58.3333	44.9631	55.0369	[EFEMP1, FBLN5, GJA1, IGFBP5, LPAR1, LTBP1, MT1E, MYC, NRP1, PPARG, PRKAR2B, SNAI2]
bioplanet_1414	Oncostatin M	CUSTOM_BioPlanet-pathway.txt.txt_09.04.2024	6.46878e-12	1.8436e-09	6.46878e-12	1.74657e-10	[-1]	Group03	9.00322	28	Specific for Cluster #2	[ANXA3, BTC, CST6, FN1, IGFBP2, MMP2]	[ADAMTS4, ANGPT2, ATF3, CCL2, CCL21, CCL8, CEBPD, CXCL12, HGF, IL6, JUN, JUNB, KRT18, MT1E, MT2A, MYC, PGF, PLAU, PPARG, RGS16, SOCS3, TNC]	21.4286	78.5714	23.7765	76.2235	[ADAMTS4, ANGPT2, ANXA3, ATF3, BTC, CCL2, CCL21, CCL8, CEBPD, CST6, CXCL12, FN1, HGF, IGFBP2, IL6, JUN, JUNB, KRT18, MMP2, MT1E, MT2A, MYC, PGF, PLAU, PPARG, RGS16, SOCS3, TNC]
bioplanet_1418	Interleukin-1 regulation of extracellular matrix	CUSTOM_BioPlanet-pathway.txt.txt_09.04.2024	7.21665e-09	2.05675e-06	7.21665e-09	1.9485e-07	[-1]	Group04	12.5	15	Specific for Cluster #2	[HAPLN1, PLXDC2, TNFRSF11B]	[BMP2, CCL2, CCL8, FABP5, FOS, IL6, JUN, MT2A, NR2F2, NR4A3, PPARG, ZFP36]	20	80	22.2357	77.7643	[BMP2, CCL2, CCL8, FABP5, FOS, HAPLN1, IL6, JUN, MT2A, NR2F2, NR4A3, PLXDC2, PPARG, TNFRSF11B, ZFP36]
bioplanet_1425	Interleukin-4 regulation of apoptosis	CUSTOM_BioPlanet-pathway.txt.txt_09.04.2024	6.78306e-09	1.93317e-06	6.78306e-09	1.83142e-07	[-1]	Group05	8.2397	22	Specific for Cluster #2	[FGL2, FN1, IL13RA2, PCDH7, SPINT2, VCAN]	[BMP2, CCL2, CPM, CTSC, EDNRA, FOS, GADD45B, GJA4, GUCY1B1, IL6, JUN, LAMA3, MYC, NFIL3, TIMP3, TNC]	27.2727	72.7273	30.0164	69.9836	[BMP2, CCL2, CPM, CTSC, EDNRA, FGL2, FN1, FOS, GADD45B, GJA4, GUCY1B1, IL13RA2, IL6, JUN, LAMA3, MYC, NFIL3, PCDH7, SPINT2, TIMP3, TNC, VCAN]
bioplanet_1433	TSH regulation of gene expression	CUSTOM_BioPlanet-pathway.txt.txt_09.04.2024	2.77315e-12	7.90347e-10	2.77315e-12	7.48749e-11	[-1]	Group06	17.5258	17	Specific for Cluster #2	[NOX4]	[ADAMTS1, ADCY3, AGT, CCL2, CSF1, EGR1, FOS, GADD45B, JUN, MYC, NOTCH3, NR4A1, NR4A3, PGF, RGS16, TIMP3]	5.88235	94.1176	6.67153	93.3285	[ADAMTS1, ADCY3, AGT, CCL2, CSF1, EGR1, FOS, GADD45B, JUN, MYC, NOTCH3, NOX4, NR4A1, NR4A3, PGF, RGS16, TIMP3]
bioplanet_1435	FSH regulation of apoptosis	CUSTOM_BioPlanet-pathway.txt.txt_09.04.2024	1.02362e-05	0.00291733	1.02362e-05	0.000276379	[-1]	Group07	6.46388	17	Specific for Cluster #2	[ATRNL1, CLU, TFPI2, TNFRSF11B]	[APOE, CD36, IFITM1, IGFBP4, IGFBP5, KRT18, NPY1R, RGS16, THBS1, THY1, TIMP3, TP53I11, ZNF331]	23.5294	76.4706	26.0313	73.9687	[APOE, ATRNL1, CD36, CLU, IFITM1, IGFBP4, IGFBP5, KRT18, NPY1R, RGS16, TFPI2, THBS1, THY1, TIMP3, TNFRSF11B, TP53I11, ZNF331]
CUSTOM:WP4541_456	Hippo Merlin signaling dysregulation	CUSTOM_wikipathways-20240310-gmt-Homo-sapiens (1).gmt_09.04.2024	1.74918e-05	0.00498518	1.74918e-05	0.00047228	[-1]	Group08	9.09091	11	None Specific Cluster	[CDH13, CDH2, ITGA10, ITGA11, ITGA8, PDGFRA]	[CDH6, MYC, NGFR, NTRK2, PRKAR2B]	54.5455	45.4545	57.8504	42.1496	[CDH13, CDH2, CDH6, ITGA10, ITGA11, ITGA8, MYC, NGFR, NTRK2, PDGFRA, PRKAR2B]
bioplanet_1438	EGFR1 pathway	CUSTOM_BioPlanet-pathway.txt.txt_09.04.2024	3.03165e-05	0.0086402	3.03165e-05	0.000818545	[-1]	Group09	7.89474	12	Specific for Cluster #2	[]	[CSF1, FGF7, HGF, MT1F, MT1M, MYC, NR4A3, PHLDA1, PHLDA2, PLAU, SPRY2, TIMP3]	0	100	0	100	[CSF1, FGF7, HGF, MT1F, MT1M, MYC, NR4A3, PHLDA1, PHLDA2, PLAU, SPRY2, TIMP3]
bioplanet_1442	TGF-beta regulation of extracellular matrix	CUSTOM_BioPlanet-pathway.txt.txt_09.04.2024	2.26457e-24	6.45403e-22	2.26457e-24	6.11434e-23	[-1]	Group10	9.73451	55	None Specific Cluster	[AKR1C2, CCN5, CDH2, COL8A2, CST6, EFEMP1, FBLN5, FGL2, FN1, HAND2, ITGA11, LMO7, LPAR1, LTBP2, MYOZ2, NOX4, NPTX2, OGN, PDGFD, PDGFRA, PTGIS, SCRG1, SFRP1, SPINT2, TFPI2, THBS2, UCHL1, VCAN]	[ABCC9, ADAMTS1, AGT, AGTR1, ANGPT2, APOE, ATF3, C7, CCL8, CD36, CEBPD, CFD, CSF1, CTSC, FGF7, HGF, IL6, JUNB, LAMA4, MYC, NR2F2, PPARG, SLIT3, SNAI2, SRPX, TIMP3, TNC]	50.9091	49.0909	54.2567	45.7433	[ABCC9, ADAMTS1, AGT, AGTR1, AKR1C2, ANGPT2, APOE, ATF3, C7, CCL8, CCN5, CD36, CDH2, CEBPD, CFD, COL8A2, CSF1, CST6, CTSC, EFEMP1, FBLN5, FGF7, FGL2, FN1, HAND2, HGF, IL6, ITGA11, JUNB, LAMA4, LMO7, LPAR1, LTBP2, MYC, MYOZ2, NOX4, NPTX2, NR2F2, OGN, PDGFD, PDGFRA, PPARG, PTGIS, SCRG1, SFRP1, SLIT3, SNAI2, SPINT2, SRPX, TFPI2, THBS2, TIMP3, TNC, UCHL1, VCAN]
CUSTOM:WP2431_111	Spinal cord injury	CUSTOM_wikipathways-20240310-gmt-Homo-sapiens (1).gmt_09.04.2024	5.62966e-08	1.60445e-05	5.62966e-08	1.52001e-06	[-1]	Group11	11.6667	14	Specific for Cluster #2	[AQP1, GJA1, NOX4, VCAN]	[BTG2, CCL2, EGR1, FOS, IL6, MYC, NGFR, NR4A1, SLIT3, ZFP36]	28.5714	71.4286	31.3894	68.6106	[AQP1, BTG2, CCL2, EGR1, FOS, GJA1, IL6, MYC, NGFR, NOX4, NR4A1, SLIT3, VCAN, ZFP36]
bioplanet_29	TSP1-induced apoptosis in microvascular endothelial cell	CUSTOM_BioPlanet-pathway.txt.txt_09.04.2024	8.07433e-06	0.00230118	8.07433e-06	0.000218007	[-1]	Group12	50	4	Specific for Cluster #2	[]	[CD36, FOS, JUN, THBS1]	0	100	0	100	[CD36, FOS, JUN, THBS1]
CUSTOM:WP2877_177	Vitamin D receptor pathway	CUSTOM_wikipathways-20240310-gmt-Homo-sapiens (1).gmt_09.04.2024	1.21798e-05	0.00347125	1.21798e-05	0.000328856	[-1]	Group13	7.48663	14	None Specific Cluster	[CD200, COL13A1, CST6, GXYLT2, SFRP1, TNFRSF11B]	[ADAMTS5, CLMN, COLEC11, IGFBP5, JUNB, MYC, STEAP4, TIMP3]	42.8571	57.1429	46.1733	53.8267	[ADAMTS5, CD200, CLMN, COL13A1, COLEC11, CST6, GXYLT2, IGFBP5, JUNB, MYC, SFRP1, STEAP4, TIMP3, TNFRSF11B]
CUSTOM:WP3859_274	TGF beta signaling in thyroid cells for epithelial mesenchymal transition	CUSTOM_wikipathways-20240310-gmt-Homo-sapiens (1).gmt_09.04.2024	1.16667e-05	0.003325	1.16667e-05	0.000315	[-1]	Group14	29.4118	5	None Specific Cluster	[CDH2, FN1]	[CDH6, SNAI2, TNC]	40	60	43.2624	56.7376	[CDH2, CDH6, FN1, SNAI2, TNC]
CUSTOM:WP5205_708	Clock controlled autophagy in bone metabolism	CUSTOM_wikipathways-20240310-gmt-Homo-sapiens (1).gmt_09.04.2024	1.86601e-05	0.00531812	1.86601e-05	0.000503822	[-1]	Group15	11.25	9	None Specific Cluster	[BHLHE41, CTHRC1, SOST, TNFRSF11B]	[BMP2, CHRD, CSF1, IL6, SERPINF1]	44.4444	55.5556	47.7807	52.2193	[BHLHE41, BMP2, CHRD, CSF1, CTHRC1, IL6, SERPINF1, SOST, TNFRSF11B]
CUSTOM:WP98_870	Prostaglandin synthesis and regulation	CUSTOM_wikipathways-20240310-gmt-Homo-sapiens (1).gmt_09.04.2024	1.66814e-06	0.000475419	1.66814e-06	4.50397e-05	[-1]	Group16	17.7778	8	None Specific Cluster	[AKR1C2, ANXA3, PTGIS, TBXA2R]	[EDNRA, EDNRB, PPARG, PTGER1]	50	50	53.3528	46.6472	[AKR1C2, ANXA3, EDNRA, EDNRB, PPARG, PTGER1, PTGIS, TBXA2R]
KEGG:04020	Calcium signaling pathway	KEGG_09.04.2024	2.44481e-05	0.0069677	2.44481e-05	0.000660098	[-1]	Group17	6.32411	16	Specific for Cluster #2	[ERBB4, PDGFD, PDGFRA, TBXA2R]	[ADCY3, AGTR1, AVPR1A, EDNRA, EDNRB, FGF10, FGF7, GRIN2A, HGF, HRC, NTRK2, PTGER1]	25	75	27.6018	72.3982	[ADCY3, AGTR1, AVPR1A, EDNRA, EDNRB, ERBB4, FGF10, FGF7, GRIN2A, HGF, HRC, NTRK2, PDGFD, PDGFRA, PTGER1, TBXA2R]
CUSTOM:HALLMARK_HYPOXIA_21	HALLMARK_HYPOXIA	CUSTOM_h.all.v2023.2.Hs.symbols.gmt_09.04.2024	5.81826e-06	0.0016582	5.81826e-06	0.000157093	[-1]	Group18	7.5	15	Specific for Cluster #2	[CCN5, PAM, PFKFB3]	[ANGPTL4, ATF3, FOS, IL6, JUN, MT1E, MT2A, NFIL3, PGF, SLC2A3, SRPX, ZFP36]	20	80	22.2357	77.7643	[ANGPTL4, ATF3, CCN5, FOS, IL6, JUN, MT1E, MT2A, NFIL3, PAM, PFKFB3, PGF, SLC2A3, SRPX, ZFP36]
KEGG:04933	AGE-RAGE signaling pathway in diabetic complications	KEGG_09.04.2024	1.83724e-05	0.00523614	1.83724e-05	0.000496056	[-1]	Group19	10	10	None Specific Cluster	[COL4A4, FN1, MMP2, NOX4]	[AGT, AGTR1, CCL2, EGR1, IL6, JUN]	40	60	43.2624	56.7376	[AGT, AGTR1, CCL2, COL4A4, EGR1, FN1, IL6, JUN, MMP2, NOX4]
KEGG:05200	Pathways in cancer	KEGG_09.04.2024	2.77388e-06	0.000790557	2.77388e-06	7.48949e-05	[-1]	Group20	5.08475	27	Specific for Cluster #2	[COL4A4, FN1, LPAR1, MMP2, PDGFRA]	[ADCY3, AGT, AGTR1, BMP2, CXCL12, EDNRA, EDNRB, FGF10, FGF7, FOS, GADD45B, HGF, IL6, JUN, LAMA3, LAMA4, MYC, NOTCH3, PGF, PPARG, PTGER1, WNT6]	18.5185	81.4815	20.6313	79.3687	[ADCY3, AGT, AGTR1, BMP2, COL4A4, CXCL12, EDNRA, EDNRB, FGF10, FGF7, FN1, FOS, GADD45B, HGF, IL6, JUN, LAMA3, LAMA4, LPAR1, MMP2, MYC, NOTCH3, PDGFRA, PGF, PPARG, PTGER1, WNT6]
R-HSA:1566948	Elastic fibre formation	REACTOME_Pathways_09.04.2024	1.3941e-06	0.000397318	1.3941e-06	3.76407e-05	[-1]	Group21	18.1818	8	Specific for Cluster #1	[EFEMP1, FBLN5, FN1, ITGA8, LTBP1, LTBP2, MFAP2]	[BMP2]	87.5	12.5	88.8966	11.1034	[BMP2, EFEMP1, FBLN5, FN1, ITGA8, LTBP1, LTBP2, MFAP2]
R-HSA:2129379	Molecules associated with elastic fibres	REACTOME_Pathways_09.04.2024	3.40385e-07	9.70098e-05	1.3941e-06	3.76407e-05	[-1]	Group21	21.6216	8	Specific for Cluster #1	[EFEMP1, FBLN5, FN1, ITGA8, LTBP1, LTBP2, MFAP2]	[BMP2]	87.5	12.5	88.8966	11.1034	[BMP2, EFEMP1, FBLN5, FN1, ITGA8, LTBP1, LTBP2, MFAP2]
R-HSA:5660526	Response to metal ions	REACTOME_Pathways_09.04.2024	3.95362e-06	0.00112678	3.95362e-06	0.000106748	[-1]	Group22	35.7143	5	Specific for Cluster #2	[]	[MT1A, MT1E, MT1F, MT1M, MT2A]	0	100	0	100	[MT1A, MT1E, MT1F, MT1M, MT2A]
R-HSA:5661231	Metallothioneins bind metals	REACTOME_Pathways_09.04.2024	9.55722e-07	0.000272381	3.95362e-06	0.000106748	[-1]	Group22	45.4545	5	Specific for Cluster #2	[]	[MT1A, MT1E, MT1F, MT1M, MT2A]	0	100	0	100	[MT1A, MT1E, MT1F, MT1M, MT2A]
R-HSA:381426	Regulation of Insulin-like Growth Factor (IGF) transport and uptake by Insulin-like Growth Factor Binding Proteins (IGFBPs)	REACTOME_Pathways_09.04.2024	9.47243e-08	2.69964e-05	9.47243e-08	2.55756e-06	[-1]	Group23	11.2	14	None Specific Cluster	[CDH2, FN1, IGFBP2, LTBP1, MMP2, VCAN]	[APOE, CHRDL1, CSF1, HRC, IGFBP4, IGFBP5, IL6, TNC]	42.8571	57.1429	46.1733	53.8267	[APOE, CDH2, CHRDL1, CSF1, FN1, HRC, IGFBP2, IGFBP4, IGFBP5, IL6, LTBP1, MMP2, TNC, VCAN]
R-HSA:8957275	Post-translational protein phosphorylation	REACTOME_Pathways_09.04.2024	8.65242e-07	0.000246594	9.47243e-08	2.55756e-06	[-1]	Group23	11.1111	12	Specific for Cluster #2	[CDH2, FN1, LTBP1, VCAN]	[APOE, CHRDL1, CSF1, HRC, IGFBP4, IGFBP5, IL6, TNC]	33.3333	66.6667	36.3817	63.6183	[APOE, CDH2, CHRDL1, CSF1, FN1, HRC, IGFBP4, IGFBP5, IL6, LTBP1, TNC, VCAN]
CUSTOM:WP289_186	Myometrial relaxation and contraction pathways	CUSTOM_wikipathways-20240310-gmt-Homo-sapiens (1).gmt_09.04.2024	1.46159e-06	0.000416552	1.46159e-06	3.94629e-05	[-1]	Group24	8.97436	14	Specific for Cluster #2	[GJA1, IGFBP2, LPAR1, RAMP1]	[ADCY3, ATF3, FOS, IGFBP4, IGFBP5, IL6, JUN, PRKAR2B, RGS16, RGS6]	28.5714	71.4286	31.3894	68.6106	[ADCY3, ATF3, FOS, GJA1, IGFBP2, IGFBP4, IGFBP5, IL6, JUN, LPAR1, PRKAR2B, RAMP1, RGS16, RGS6]
bioplanet_1738	Myometrial relaxation and contraction pathways	CUSTOM_BioPlanet-pathway.txt.txt_09.04.2024	1.35291e-06	0.000385581	1.46159e-06	3.94629e-05	[-1]	Group24	9.03226	14	Specific for Cluster #2	[GJA1, IGFBP2, LPAR1, RAMP1]	[ADCY3, ATF3, FOS, IGFBP4, IGFBP5, IL6, JUN, PRKAR2B, RGS16, RGS6]	28.5714	71.4286	31.3894	68.6106	[ADCY3, ATF3, FOS, GJA1, IGFBP2, IGFBP4, IGFBP5, IL6, JUN, LPAR1, PRKAR2B, RAMP1, RGS16, RGS6]
CUSTOM:HALLMARK_TNFA_SIGNALING_VIA_NFKB_44	HALLMARK_TNFA_SIGNALING_VIA_NFKB	CUSTOM_h.all.v2023.2.Hs.symbols.gmt_09.04.2024	6.98928e-15	1.99195e-12	4.7553e-19	1.28393e-17	[-1]	Group25	13	26	Specific for Cluster #2	[PFKFB3]	[ATF3, BMP2, BTG2, CCL2, CEBPD, CSF1, EGR1, FOS, FOSB, GADD45B, IL6, JUN, JUNB, MYC, NFIL3, NR4A1, NR4A2, NR4A3, PHLDA1, PHLDA2, PLAU, SLC2A3, SOCS3, TNC, ZFP36]	3.84615	96.1538	4.37485	95.6252	[ATF3, BMP2, BTG2, CCL2, CEBPD, CSF1, EGR1, FOS, FOSB, GADD45B, IL6, JUN, JUNB, MYC, NFIL3, NR4A1, NR4A2, NR4A3, PFKFB3, PHLDA1, PHLDA2, PLAU, SLC2A3, SOCS3, TNC, ZFP36]
R-HSA:6785807	Interleukin-4 and Interleukin-13 signaling	REACTOME_Pathways_09.04.2024	8.65242e-07	0.000246594	4.7553e-19	1.28393e-17	[-1]	Group25	11.1111	12	Specific for Cluster #2	[FN1, IL13RA2, MMP2]	[CCL2, CD36, CEBPD, FOS, HGF, IL6, JUNB, MYC, SOCS3]	25	75	27.6018	72.3982	[CCL2, CD36, CEBPD, FN1, FOS, HGF, IL13RA2, IL6, JUNB, MMP2, MYC, SOCS3]
bioplanet_1311	FRA pathway	CUSTOM_BioPlanet-pathway.txt.txt_09.04.2024	2.02869e-08	5.78177e-06	4.7553e-19	1.28393e-17	[-1]	Group25	24.3243	9	Specific for Cluster #2	[GJA1, MGP, MMP2]	[CCL2, IL6, JUN, JUNB, LAMA3, PLAU]	33.3333	66.6667	36.3817	63.6183	[CCL2, GJA1, IL6, JUN, JUNB, LAMA3, MGP, MMP2, PLAU]
bioplanet_1342	ATF2 transcription factor network	CUSTOM_BioPlanet-pathway.txt.txt_09.04.2024	1.42691e-06	0.000406669	4.7553e-19	1.28393e-17	[-1]	Group25	15.2542	9	Specific for Cluster #2	[MMP2, PDGFRA]	[ATF3, FOS, IL6, JUN, JUNB, PLAU, SOCS3]	22.2222	77.7778	24.6299	75.3701	[ATF3, FOS, IL6, JUN, JUNB, MMP2, PDGFRA, PLAU, SOCS3]
bioplanet_1343	AP-1 transcription factor network	CUSTOM_BioPlanet-pathway.txt.txt_09.04.2024	3.7648e-11	1.07297e-08	4.7553e-19	1.28393e-17	[-1]	Group25	20	14	Specific for Cluster #2	[GJA1]	[AGT, ATF3, CCL2, EGR1, FABP4, FOS, FOSB, IL6, JUN, JUNB, MT2A, MYC, PLAU]	7.14286	92.8571	8.08661	91.9134	[AGT, ATF3, CCL2, EGR1, FABP4, FOS, FOSB, GJA1, IL6, JUN, JUNB, MT2A, MYC, PLAU]
bioplanet_1443	BDNF signaling pathway	CUSTOM_BioPlanet-pathway.txt.txt_09.04.2024	1.60958e-15	4.5873e-13	4.7553e-19	1.28393e-17	[-1]	Group25	11.4943	30	Specific for Cluster #2	[CD200, CDH2, CLU, MGP, PDGFRA, RAMP1, TFPI2, VCAN]	[ATF3, BMP2, BTG2, C7, CXCL12, EGR1, FOS, FOSB, HGF, IGFBP4, IGFBP5, IL6, JUN, JUNB, LAMA3, MYC, NR4A1, NR4A2, NR4A3, PHLDA2, SLIT3, ZFP36]	26.6667	73.3333	29.374	70.626	[ATF3, BMP2, BTG2, C7, CD200, CDH2, CLU, CXCL12, EGR1, FOS, FOSB, HGF, IGFBP4, IGFBP5, IL6, JUN, JUNB, LAMA3, MGP, MYC, NR4A1, NR4A2, NR4A3, PDGFRA, PHLDA2, RAMP1, SLIT3, TFPI2, VCAN, ZFP36]
CUSTOM:WP306_195	Focal adhesion	CUSTOM_wikipathways-20240310-gmt-Homo-sapiens (1).gmt_09.04.2024	2.20487e-07	6.28387e-05	7.3031e-19	1.97184e-17	[-1]	Group26	8.54271	17	None Specific Cluster	[COL4A4, FN1, ITGA10, ITGA11, ITGA8, PDGFD, PDGFRA, THBS2, TLN2]	[COL5A3, HGF, JUN, LAMA3, LAMA4, PGF, THBS1, TNC]	52.9412	47.0588	56.2692	43.7308	[COL4A4, COL5A3, FN1, HGF, ITGA10, ITGA11, ITGA8, JUN, LAMA3, LAMA4, PDGFD, PDGFRA, PGF, THBS1, THBS2, TLN2, TNC]
CUSTOM:WP3932_302	Focal adhesion PI3K Akt mTOR signaling pathway	CUSTOM_wikipathways-20240310-gmt-Homo-sapiens (1).gmt_09.04.2024	1.35881e-08	3.87262e-06	7.3031e-19	1.97184e-17	[-1]	Group26	7.61589	23	None Specific Cluster	[COL4A4, FN1, ITGA10, ITGA11, ITGA8, LPAR1, PDGFD, PDGFRA, PFKFB3, THBS2]	[ANGPT2, COL5A3, CSF1, FGF10, FGF7, HGF, LAMA3, LAMA4, NGFR, PGF, SLC2A3, THBS1, TNC]	43.4783	56.5217	46.8031	53.1969	[ANGPT2, COL4A4, COL5A3, CSF1, FGF10, FGF7, FN1, HGF, ITGA10, ITGA11, ITGA8, LAMA3, LAMA4, LPAR1, NGFR, PDGFD, PDGFRA, PFKFB3, PGF, SLC2A3, THBS1, THBS2, TNC]
CUSTOM:WP4172_353	PI3K Akt signaling pathway	CUSTOM_wikipathways-20240310-gmt-Homo-sapiens (1).gmt_09.04.2024	1.27281e-07	3.62752e-05	7.3031e-19	1.97184e-17	[-1]	Group26	6.74487	23	None Specific Cluster	[COL4A4, FN1, ITGA10, ITGA11, ITGA8, LPAR1, PDGFD, PDGFRA, THBS2]	[ANGPT2, CSF1, FGF10, FGF7, HGF, IL6, LAMA3, LAMA4, MYC, NGFR, NTRK2, PGF, THBS1, TNC]	39.1304	60.8696	42.372	57.628	[ANGPT2, COL4A4, CSF1, FGF10, FGF7, FN1, HGF, IL6, ITGA10, ITGA11, ITGA8, LAMA3, LAMA4, LPAR1, MYC, NGFR, NTRK2, PDGFD, PDGFRA, PGF, THBS1, THBS2, TNC]
CUSTOM:WP5087_630	Pleural mesothelioma	CUSTOM_wikipathways-20240310-gmt-Homo-sapiens (1).gmt_09.04.2024	2.26499e-12	6.45522e-10	7.3031e-19	1.97184e-17	[-1]	Group26	7.74487	34	Specific for Cluster #2	[BTC, CDH13, CDH2, COL4A4, CTHRC1, FN1, MMP2, PDGFD, PDGFRA, SFRP1, SOST]	[ADAMTS1, ANGPT2, ATF3, CCL2, CDH6, CSF1, CXCL12, FABP4, FGF10, FGF7, HGF, IL6, JUN, LAMA3, LAMA4, MDK, MYC, NGFR, NTRK2, PGF, PLAU, SERPINF1, WNT6]	32.3529	67.6471	35.3592	64.6408	[ADAMTS1, ANGPT2, ATF3, BTC, CCL2, CDH13, CDH2, CDH6, COL4A4, CSF1, CTHRC1, CXCL12, FABP4, FGF10, FGF7, FN1, HGF, IL6, JUN, LAMA3, LAMA4, MDK, MMP2, MYC, NGFR, NTRK2, PDGFD, PDGFRA, PGF, PLAU, SERPINF1, SFRP1, SOST, WNT6]
KEGG:04015	Rap1 signaling pathway	KEGG_09.04.2024	1.0499e-05	0.00299222	7.3031e-19	1.97184e-17	[-1]	Group26	7.14286	15	Specific for Cluster #2	[AFDN, LPAR1, PDGFD, PDGFRA, TLN2]	[ADCY3, ANGPT2, CSF1, FGF10, FGF7, GRIN2A, HGF, NGFR, PGF, THBS1]	33.3333	66.6667	36.3817	63.6183	[ADCY3, AFDN, ANGPT2, CSF1, FGF10, FGF7, GRIN2A, HGF, LPAR1, NGFR, PDGFD, PDGFRA, PGF, THBS1, TLN2]
KEGG:04151	PI3K-Akt signaling pathway	KEGG_09.04.2024	1.87688e-08	5.3491e-06	7.3031e-19	1.97184e-17	[-1]	Group26	6.96379	25	None Specific Cluster	[COL4A4, ERBB4, FN1, ITGA10, ITGA11, ITGA8, LPAR1, PDGFD, PDGFRA, THBS2]	[ANGPT2, CSF1, FGF10, FGF7, HGF, IL6, LAMA3, LAMA4, MYC, NGFR, NR4A1, NTRK2, PGF, THBS1, TNC]	40	60	43.2624	56.7376	[ANGPT2, COL4A4, CSF1, ERBB4, FGF10, FGF7, FN1, HGF, IL6, ITGA10, ITGA11, ITGA8, LAMA3, LAMA4, LPAR1, MYC, NGFR, NR4A1, NTRK2, PDGFD, PDGFRA, PGF, THBS1, THBS2, TNC]
KEGG:04510	Focal adhesion	KEGG_09.04.2024	1.38581e-06	0.000394956	7.3031e-19	1.97184e-17	[-1]	Group26	7.92079	16	None Specific Cluster	[COL4A4, FN1, ITGA10, ITGA11, ITGA8, PDGFD, PDGFRA, THBS2, TLN2]	[HGF, JUN, LAMA3, LAMA4, PGF, THBS1, TNC]	56.25	43.75	59.5229	40.4771	[COL4A4, FN1, HGF, ITGA10, ITGA11, ITGA8, JUN, LAMA3, LAMA4, PDGFD, PDGFRA, PGF, THBS1, THBS2, TLN2, TNC]
KEGG:04512	ECM-receptor interaction	KEGG_09.04.2024	8.51013e-07	0.000242539	7.3031e-19	1.97184e-17	[-1]	Group26	12.3596	11	None Specific Cluster	[COL4A4, FN1, ITGA10, ITGA11, ITGA8, THBS2]	[CD36, LAMA3, LAMA4, THBS1, TNC]	54.5455	45.4545	57.8504	42.1496	[CD36, COL4A4, FN1, ITGA10, ITGA11, ITGA8, LAMA3, LAMA4, THBS1, THBS2, TNC]
KEGG:04820	Cytoskeleton in muscle cells	KEGG_09.04.2024	2.9231e-05	0.00833084	7.3031e-19	1.97184e-17	[-1]	Group26	6.55022	15	Specific for Cluster #1	[COL4A4, FN1, ITGA10, ITGA11, ITGA8, MYH10, MYOZ2, SGCD, THBS2, TLN2, VCAN]	[ATP1B2, COL5A3, NID1, THBS1]	73.3333	26.6667	75.8764	24.1236	[ATP1B2, COL4A4, COL5A3, FN1, ITGA10, ITGA11, ITGA8, MYH10, MYOZ2, NID1, SGCD, THBS1, THBS2, TLN2, VCAN]
R-HSA:1474228	Degradation of the extracellular matrix	REACTOME_Pathways_09.04.2024	2.37545e-06	0.000677004	7.3031e-19	1.97184e-17	[-1]	Group26	9.28571	13	None Specific Cluster	[COL13A1, COL4A4, COL8A1, COL8A2, FN1, MMP2]	[ADAMTS1, ADAMTS4, ADAMTS5, COL25A1, COL5A3, LAMA3, NID1]	46.1538	53.8462	49.5041	50.4959	[ADAMTS1, ADAMTS4, ADAMTS5, COL13A1, COL25A1, COL4A4, COL5A3, COL8A1, COL8A2, FN1, LAMA3, MMP2, NID1]
R-HSA:1474244	Extracellular matrix organization	REACTOME_Pathways_09.04.2024	4.42193e-13	1.26025e-10	7.3031e-19	1.97184e-17	[-1]	Group26	9.66667	29	Specific for Cluster #1	[COL13A1, COL21A1, COL4A4, COL8A1, COL8A2, EFEMP1, FBLN5, FN1, HAPLN1, ITGA10, ITGA11, ITGA8, LTBP1, LTBP2, MFAP2, MMP2, PCOLCE2, VCAN]	[ADAMTS1, ADAMTS4, ADAMTS5, BMP2, COL25A1, COL5A3, LAMA3, LAMA4, NID1, THBS1, TNC]	62.069	37.931	65.1761	34.8239	[ADAMTS1, ADAMTS4, ADAMTS5, BMP2, COL13A1, COL21A1, COL25A1, COL4A4, COL5A3, COL8A1, COL8A2, EFEMP1, FBLN5, FN1, HAPLN1, ITGA10, ITGA11, ITGA8, LAMA3, LAMA4, LTBP1, LTBP2, MFAP2, MMP2, NID1, PCOLCE2, THBS1, TNC, VCAN]
R-HSA:216083	Integrin cell surface interactions	REACTOME_Pathways_09.04.2024	5.31356e-07	0.000151436	7.3031e-19	1.97184e-17	[-1]	Group26	12.9412	11	Specific for Cluster #1	[COL13A1, COL4A4, COL8A1, COL8A2, FN1, ITGA10, ITGA11, ITGA8]	[COL5A3, THBS1, TNC]	72.7273	27.2727	75.3086	24.6914	[COL13A1, COL4A4, COL5A3, COL8A1, COL8A2, FN1, ITGA10, ITGA11, ITGA8, THBS1, TNC]
R-HSA:3000178	ECM proteoglycans	REACTOME_Pathways_09.04.2024	1.22401e-05	0.00348844	7.3031e-19	1.97184e-17	[-1]	Group26	11.8421	9	None Specific Cluster	[COL4A4, FN1, HAPLN1, ITGA8, VCAN]	[COL5A3, LAMA3, LAMA4, TNC]	55.5556	44.4444	58.8424	41.1576	[COL4A4, COL5A3, FN1, HAPLN1, ITGA8, LAMA3, LAMA4, TNC, VCAN]
R-HSA:8948216	Collagen chain trimerization	REACTOME_Pathways_09.04.2024	1.62969e-05	0.00464462	7.3031e-19	1.97184e-17	[-1]	Group26	15.9091	7	Specific for Cluster #1	[COL13A1, COL21A1, COL4A4, COL8A1, COL8A2]	[COL25A1, COL5A3]	71.4286	28.5714	74.0891	25.9109	[COL13A1, COL21A1, COL25A1, COL4A4, COL5A3, COL8A1, COL8A2]
bioplanet_1295	Beta-1 integrin cell surface interactions	CUSTOM_BioPlanet-pathway.txt.txt_09.04.2024	2.33839e-10	6.6644e-08	7.3031e-19	1.97184e-17	[-1]	Group26	19.697	13	None Specific Cluster	[COL4A4, FN1, ITGA10, ITGA11, ITGA8, THBS2]	[LAMA3, LAMA4, MDK, NID1, PLAU, THBS1, TNC]	46.1538	53.8462	49.5041	50.4959	[COL4A4, FN1, ITGA10, ITGA11, ITGA8, LAMA3, LAMA4, MDK, NID1, PLAU, THBS1, THBS2, TNC]
bioplanet_1303	Beta-3 integrin cell surface interactions	CUSTOM_BioPlanet-pathway.txt.txt_09.04.2024	1.3926e-05	0.00396891	7.3031e-19	1.97184e-17	[-1]	Group26	16.2791	7	Specific for Cluster #2	[COL4A4, FN1]	[LAMA4, PLAU, THBS1, THY1, TNC]	28.5714	71.4286	31.3894	68.6106	[COL4A4, FN1, LAMA4, PLAU, THBS1, THY1, TNC]
bioplanet_1341	Syndecan 4 pathway	CUSTOM_BioPlanet-pathway.txt.txt_09.04.2024	2.51729e-05	0.00717426	7.3031e-19	1.97184e-17	[-1]	Group26	18.75	6	Specific for Cluster #2	[FN1]	[CXCL12, LAMA3, MDK, THBS1, TNC]	16.6667	83.3333	18.6165	81.3835	[CXCL12, FN1, LAMA3, MDK, THBS1, TNC]
bioplanet_237	ECM-receptor interaction	CUSTOM_BioPlanet-pathway.txt.txt_09.04.2024	5.23396e-08	1.49168e-05	7.3031e-19	1.97184e-17	[-1]	Group26	14.2857	12	None Specific Cluster	[COL4A4, FN1, ITGA10, ITGA11, ITGA8, THBS2]	[CD36, COL5A3, LAMA3, LAMA4, THBS1, TNC]	50	50	53.3528	46.6472	[CD36, COL4A4, COL5A3, FN1, ITGA10, ITGA11, ITGA8, LAMA3, LAMA4, THBS1, THBS2, TNC]
bioplanet_769	Collagen biosynthesis and modifying enzymes	CUSTOM_BioPlanet-pathway.txt.txt_09.04.2024	2.51511e-05	0.00716807	7.3031e-19	1.97184e-17	[-1]	Group26	12.5	8	Specific for Cluster #1	[COL13A1, COL21A1, COL4A4, COL8A1, COL8A2, PCOLCE2]	[COL25A1, COL5A3]	75	25	77.433	22.567	[COL13A1, COL21A1, COL25A1, COL4A4, COL5A3, COL8A1, COL8A2, PCOLCE2]

## Sheet: ClueGO log
Selection Citeria:
Statistical Test Used = Enrichment/Depletion (Two-sided hypergeometric test)
Use pvalue cutoff = true
pvalue cutoff = 0.01
Correction Method Used = Bonferroni
Min GO Level = 3
Max GO Level = 8
Cluster #1
Sample File Name = File selection: ManuallyAddedOrModifiedIDs
Number of Genes = 3
Min Percentage = 4.0
Cluster #2
Sample File Name = File selection: ManuallyAddedOrModifiedIDs
Number of Genes = 3
Min Percentage = 4.0
Combine Clusters With 'Or' = true
Percentage for a Cluster to be Specific = 60.0
GO Fusion = false
GO Group = true
Kappa Score Threshold = 0.4
Over View Term = GenePercentInitialList
Group By Kappa Statistics = true
Initial Group Size = 1
Sharing Group Percentage = 50.0
ClueGO Log:
### All results were created with ClueGO v2.5.10 ###
Organism analyzed: Homo Sapiens [9606]
Identifier types used: [SymbolID]
Evidence codes used: [All]
#Genes in CUSTOM_h.all.v2023.2.Hs.symbols.gmt_09.04.2024 : 4382
#Genes in KEGG_09.04.2024 : 8736
#Genes in CUSTOM_wikipathways-20240310-gmt-Homo-sapiens (1).gmt_09.04.2024 : 8421
#Genes in CUSTOM_BioPlanet-pathway.txt.txt_09.04.2024 : 9819
#Genes in REACTOME_Pathways_09.04.2024 : 11091
#All unique genes in selected ontologies: 14836 (reference set for hypergeometric test)
#Genes from Cluster#1: unique uploaded ids 138 -> corresponding genes 137, with 1 (0.72%) missing -> 137 recognized by ClueGO.
#Genes from Cluster#2: unique uploaded ids 206 -> corresponding genes 206, with 0 (0.0%) missing -> All genes were recognized by ClueGO.
-> To improve the % of found genes, verify gene identifiers, download new available ClueGO conversion files or add/request additional files.
#Genes with functional annotations in all selected Ontologies from Cluster#1: 106 (77.37%) -> 31 (22.63%) are not functionally annotated in any selected Ontology!
#Genes with functional annotations in all selected Ontologies from Cluster#2: 173 (83.98%) -> 33 (16.02%) are not functionally annotated in any selected Ontology!
#Unique genes with functional annotations in all selected ontologies from the 2 Clusters: 279 (81.34%) -> 64 (18.66%) are not functionally annotated!
-> To improve the % of annotated genes, chose additional ontologies.
#Genes from all Clusters associated to 368 representative Terms and Pathways (after applying general selection criteria): 242 (70.55%)
#Genes from all Clusters associated to 54 representative Terms and Pathways (after p-value significance selection criteria): 169 (49.27%)
KappaScore Grouping:
Iteration: 0 with 32 groups
Iteration: 1 with 30 groups
Iteration: 2 with 27 groups
Final KappaScore groups = 27
# Terms not grouped = 0
# Merge redundant groups with >50.0% overlap
Final group size after merging: 27
#GO All Terms Specific for Cluster #1: 7
#GO All Terms Specific for Cluster #2: 27
#GO All Terms not Specific for a Cluster: 20
#GO Terms: 54
#GO Term Connections: 44
List of missing Genes -> make sure the ids exists or are written propperly -> if yes make sure you have their annotation in ClueGO!
Cluster #1
Gene IDs not found (no annotation or wrong ids) in Cluster#1:
AP002884.1
Cluster #2

## Sheet: MSigDB Hallmark 2020
HUMAN AORTIC SAMPLES, TRANSCRIPTS LDS VSMC2 vs LDS VSMC1
Pct >0.2 in higher expressing sample, Adj P<0.05, Abs FC >2.5
Table of top 10 significant p-values and q-values for MSigDB Hallmark 2020
term	p-value	q-value	overlap_genes
TNF-alpha Signaling via NF-kB	2.30066e-19	1.0583e-17	[BTG2, CSF1, CEBPD, TNC, SLC2A3, SOCS3, ZFP36, NFIL3, PLAU, MYC, CCL2, PHLDA2, JUNB, PHLDA1, EGR1, JUN, GADD45B, FOS, NR4A2, NR4A1, IL6, BMP2, NR4A3, FOSB, ATF3]
Epithelial Mesenchymal Transition	8.82592e-12	2.02996e-10	[IL32, JUN, GADD45B, IGFBP4, IGFBP2, LAMA3, FN1, TNC, THY1, THBS1, CDH6, IL6, CXCL12, COL5A3, MGP, SNAI2, TIMP3, SLIT3]
Apoptosis	2.29479e-07	3.51868e-06	[JUN, BMP2, IL6, BTG2, KRT18, GADD45B, HGF, PLPPR4, TIMP3, AVPR1A, CLU, ATF3]
Hypoxia	3.50434e-07	4.02999e-06	[SRPX, JUN, SLC2A3, FOS, PGF, MT2A, ZFP36, IL6, NFIL3, ANGPTL4, PAM, ATF3, MT1E]
UV Response Up	1.02415e-05	9.4222e-05	[NR4A1, BMP2, IL6, BTG2, IGFBP2, EPHX1, FOSB, FOS, JUNB, ATF3]
IL-2/STAT5 Signaling	1.33639e-05	0.000102456	[NRP1, BMP2, GUCY1B1, GADD45B, NFIL3, CSF1, MYC, RGS16, SLC2A3, PHLDA1, HOPX]
UV Response Dn	3.15234e-05	0.000207153	[NRP1, EFEMP1, IGFBP5, PRKAR2B, MYC, SNAI2, PPARG, LTBP1, MT1E]
KRAS Signaling Up	7.71574e-05	0.000443655	[NRP1, BMP2, MAFB, ADGRA2, PLAU, TMEM176B, RGS16, TMEM176A, SPRY2, ANGPTL4]
Cholesterol Homeostasis	0.000164371	0.000840118	[NFIL3, FABP5, PPARG, AVPR1A, CLU, ATF3]
Inflammatory Response	0.000384131	0.001767	[IFITM1, BTG2, IL6, CALCRL, CSF1, MYC, RGS16, CCL2, SLC7A2
